# Supplementary material
Source: PubMed Central journal article supplement (PMC3845176)

**1433Z\_HUMAN**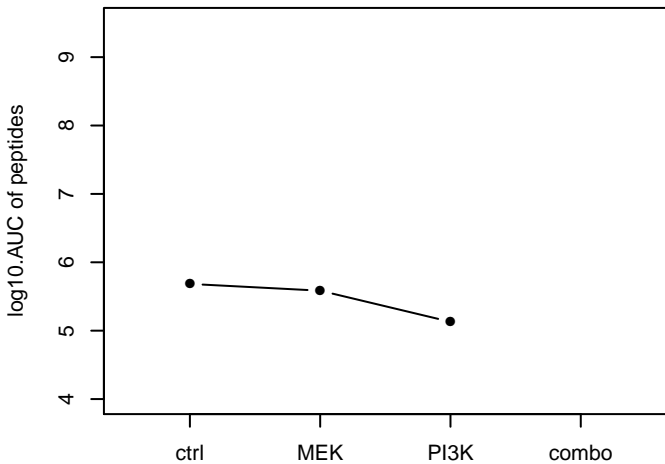**1433Z\_HUMAN**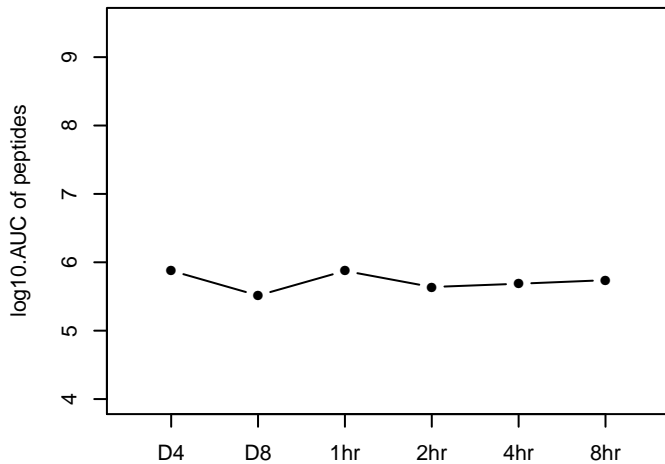**1A01\_HUMAN**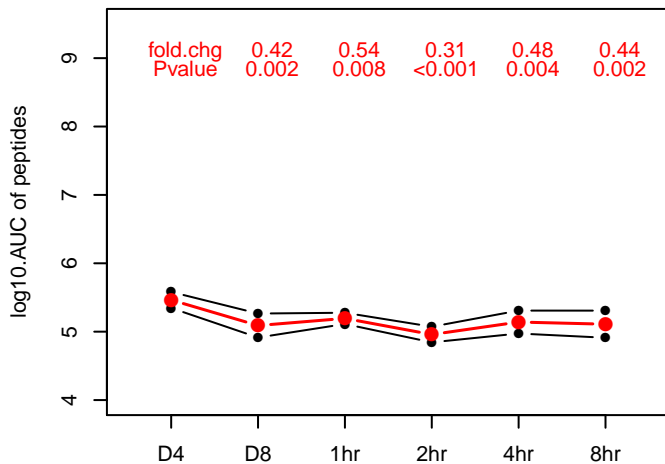**2A5A\_HUMAN**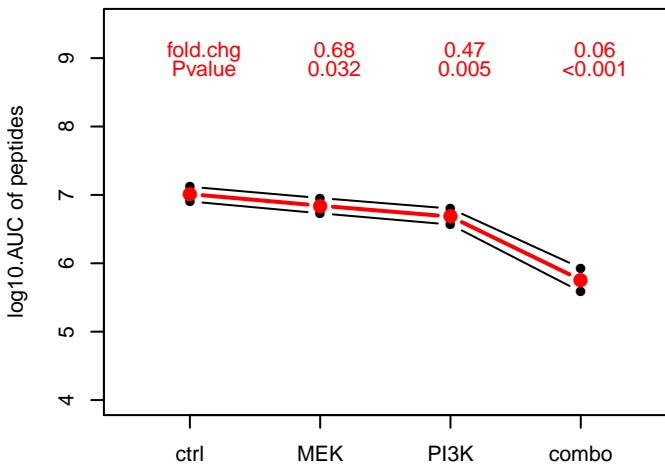**2A5A\_HUMAN**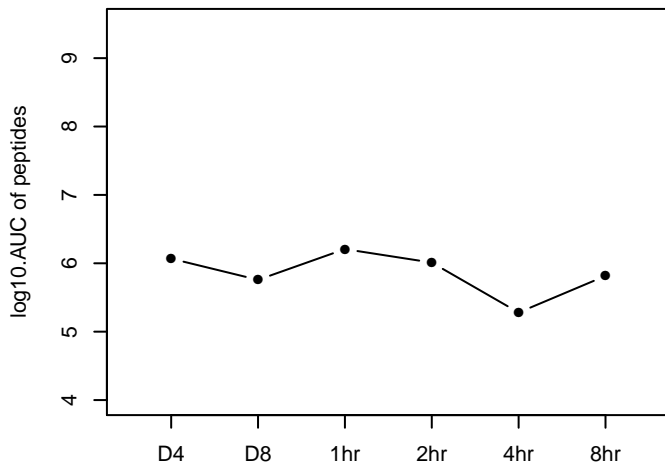

### 2A5B\_HUMAN

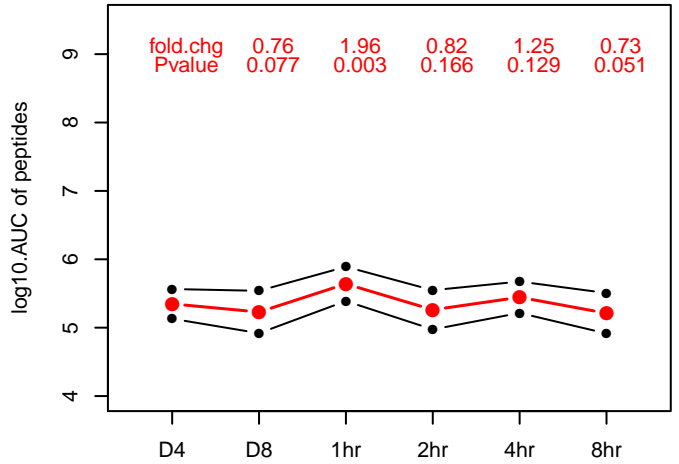

### 2A5E\_HUMAN

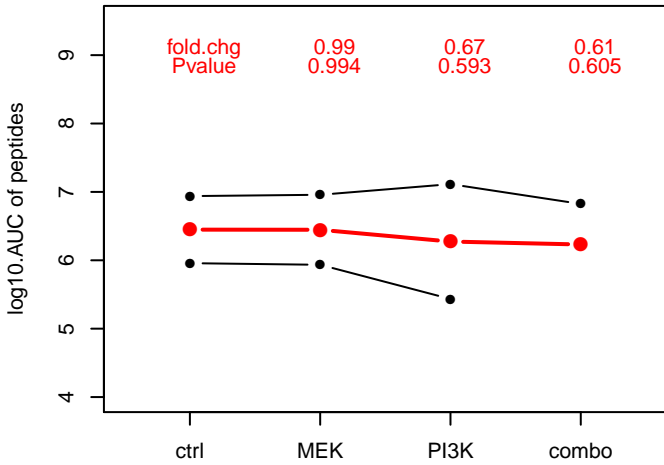

### 2A5E\_HUMAN

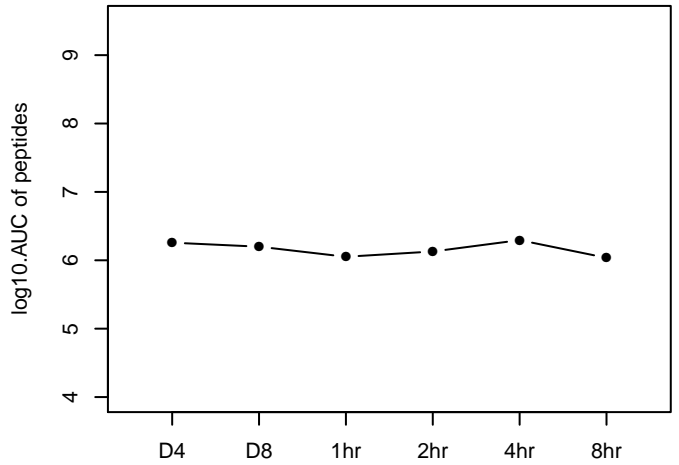

### 4EBP1\_HUMAN

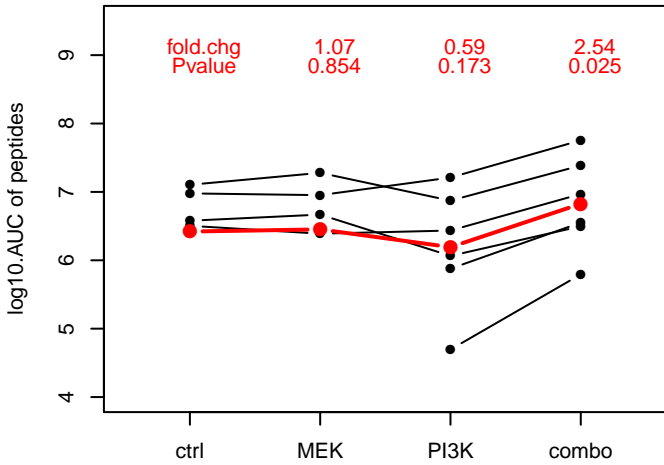

### 4EBP1\_HUMAN

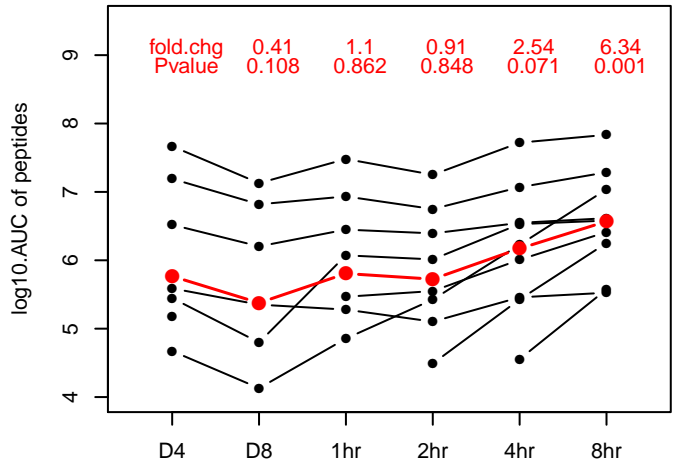

**A8K5L5\_HUMAN**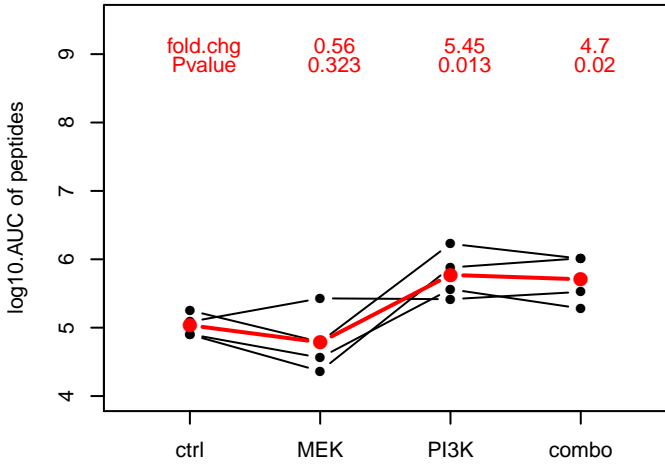**A8K5L5\_HUMAN**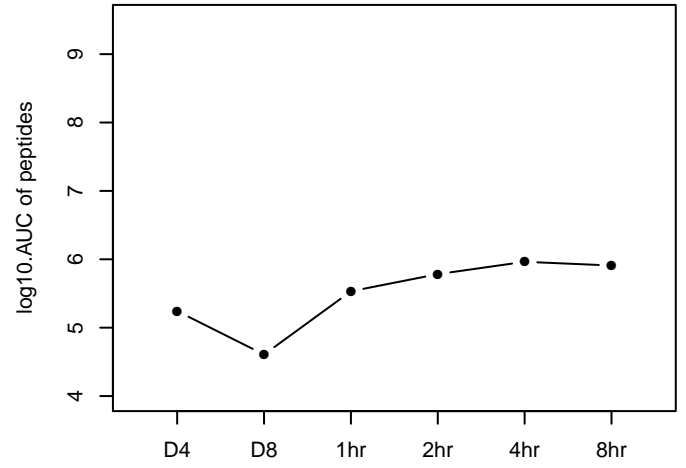**A8K7U3\_HUMAN**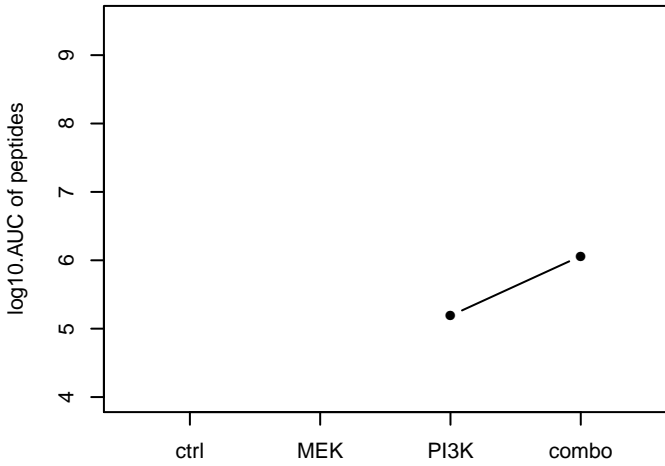**A8K7U3\_HUMAN**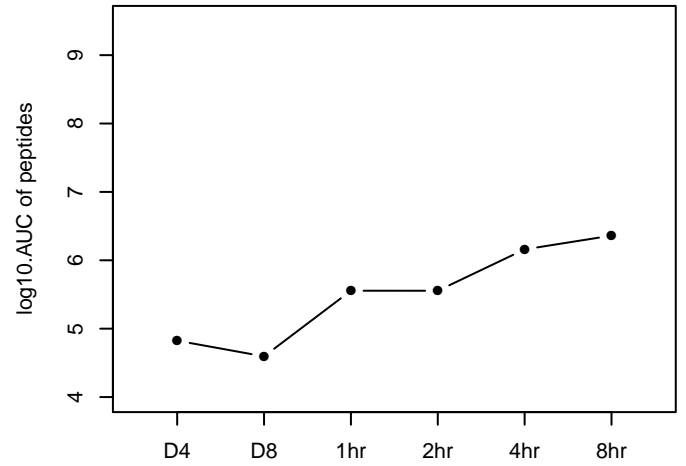**A8K968\_HUMAN**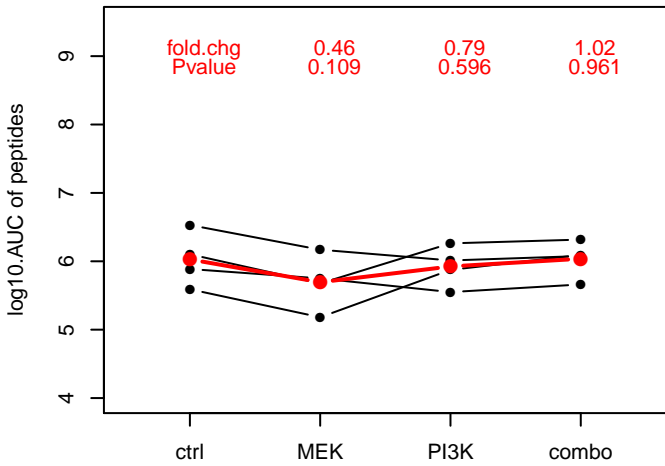**A8K968\_HUMAN**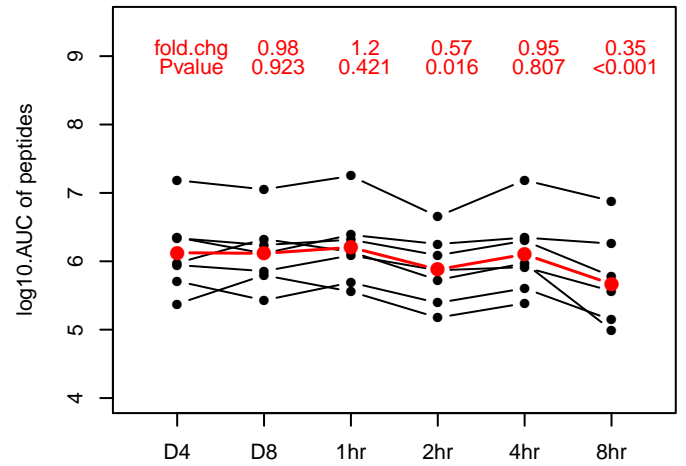

### A8KA09\_HUMAN

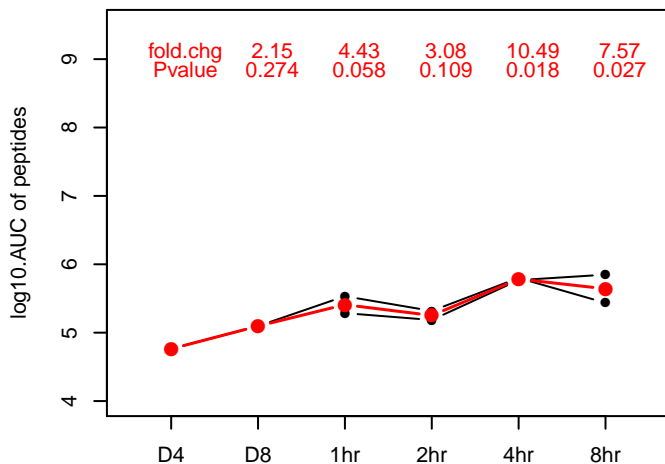

### ABCA7\_HUMAN

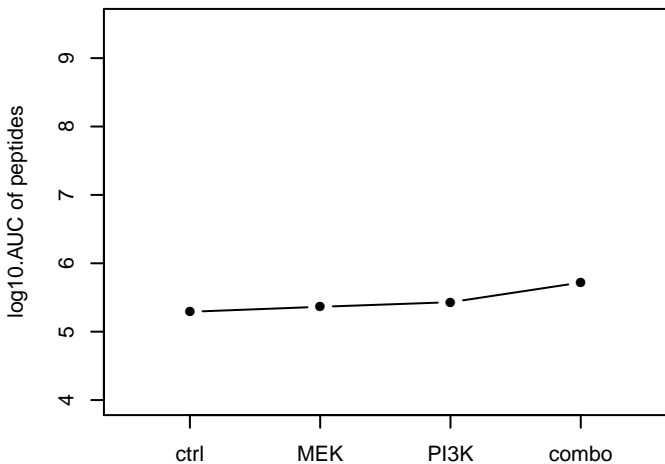

### ABCA7\_HUMAN

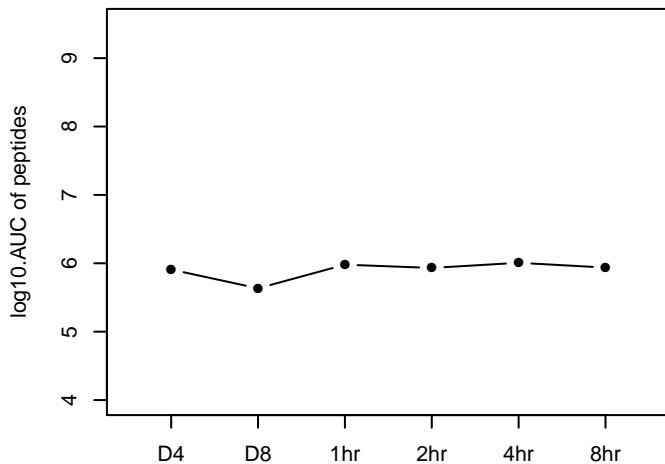

### ABCB6\_HUMAN

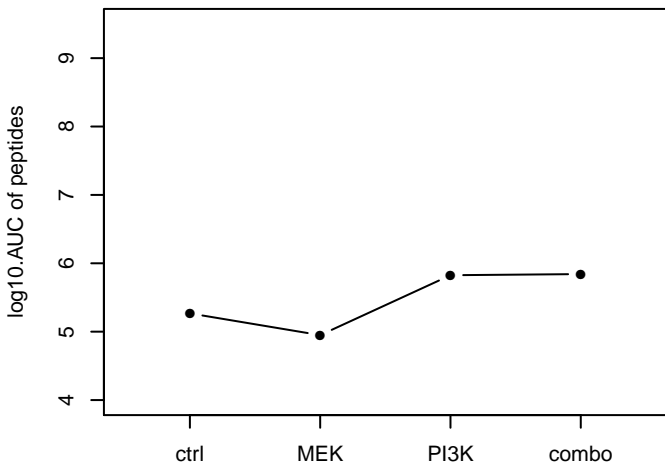

### ABCB6\_HUMAN

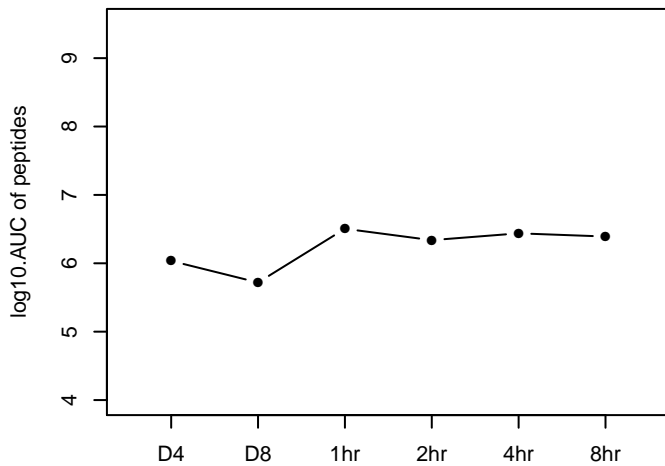

**ABCF1\_HUMAN**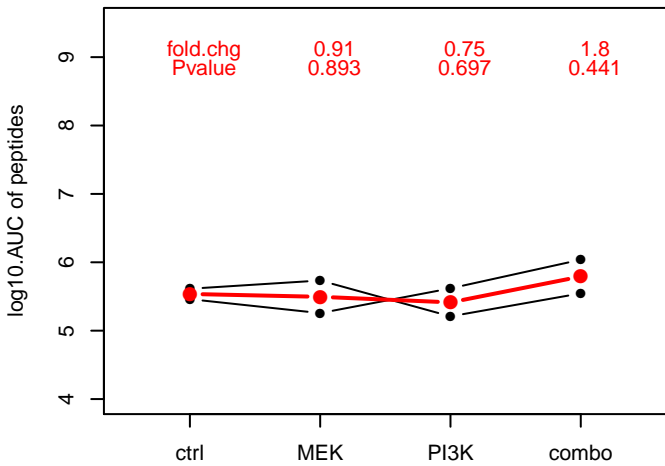**ABCF1\_HUMAN**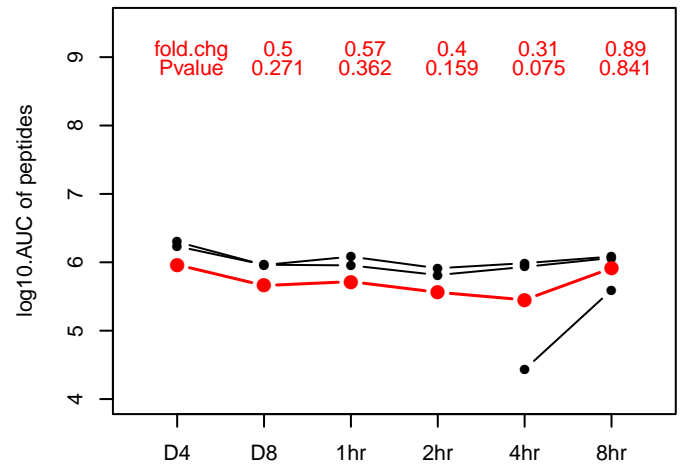**ABLM1\_HUMAN**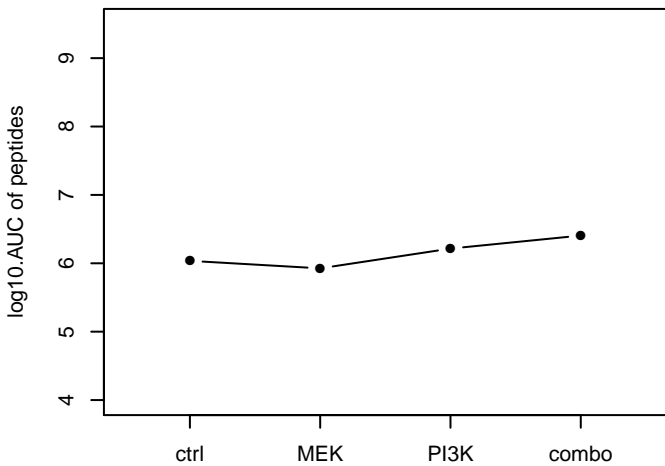**ABLM1\_HUMAN**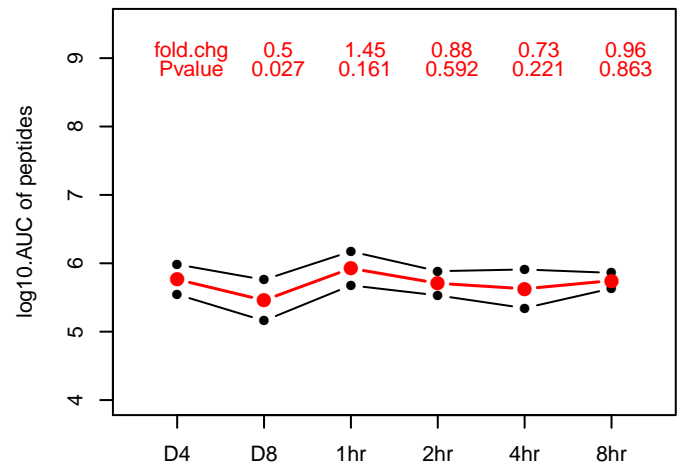**ACINU\_HUMAN**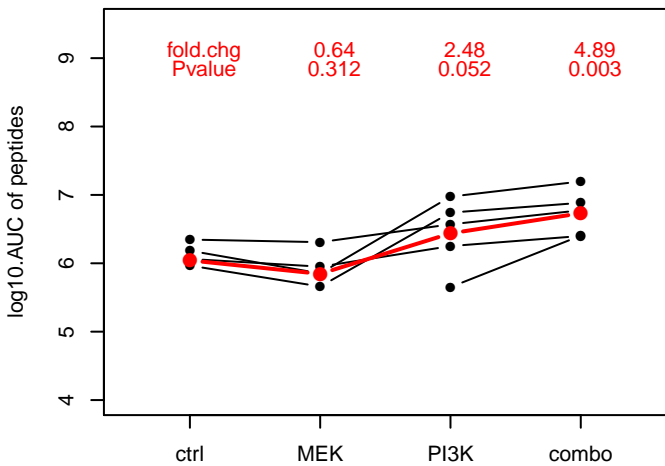**ACINU\_HUMAN**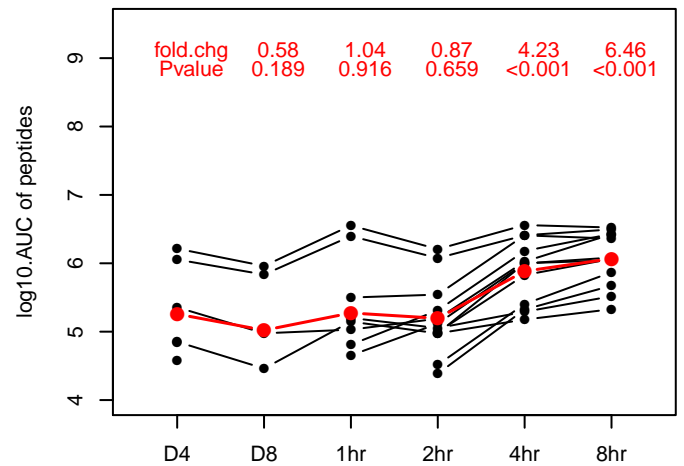

**ACLY\_HUMAN**

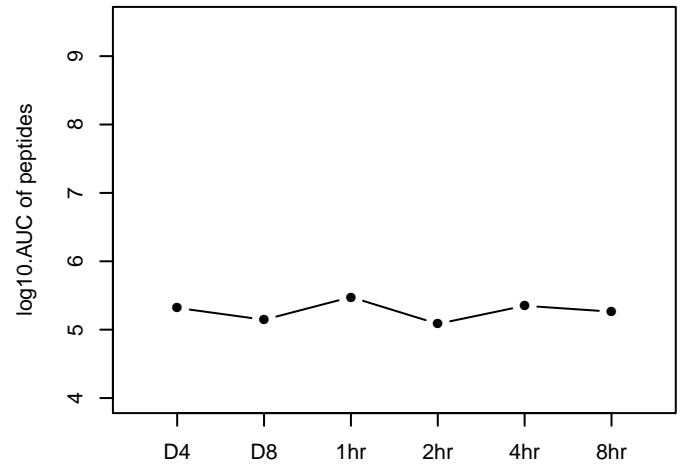

**ACSL3\_HUMAN**

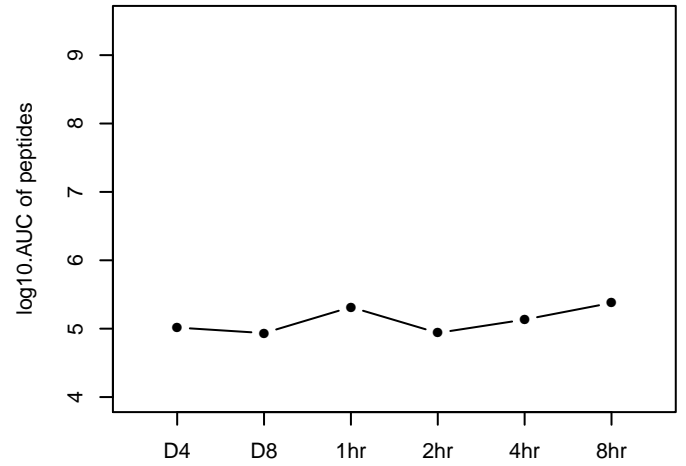

**ACTA\_HUMAN**

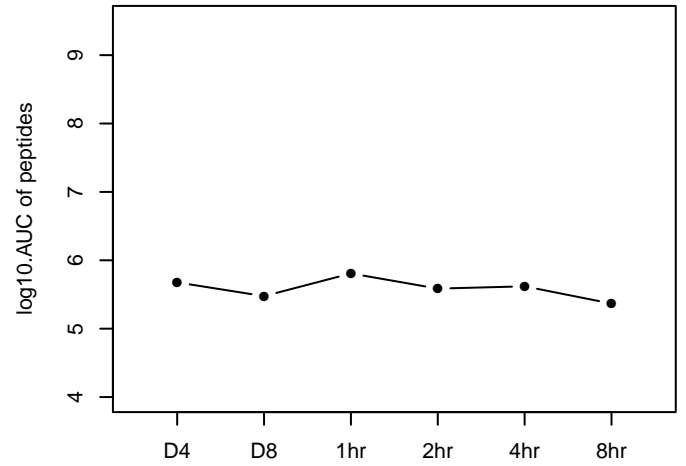

### ACTN1\_HUMAN

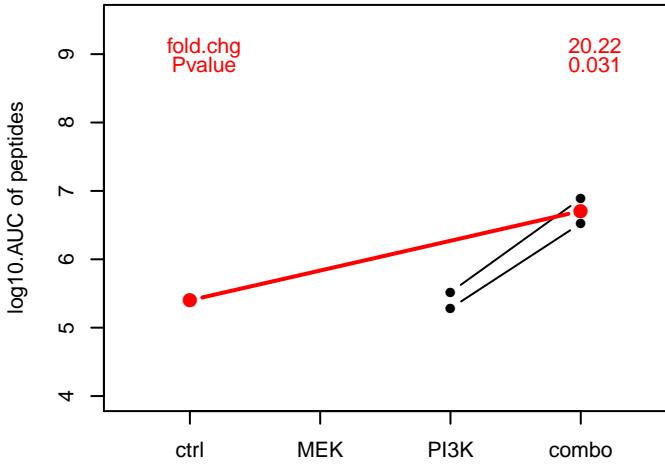

### ACTN1\_HUMAN

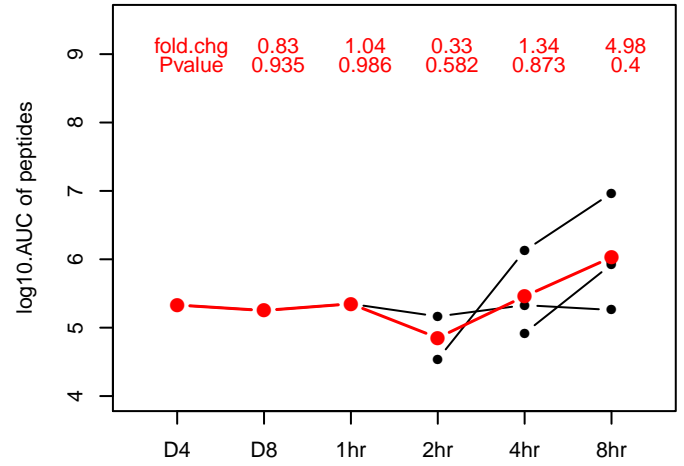

### ACTN4\_HUMAN

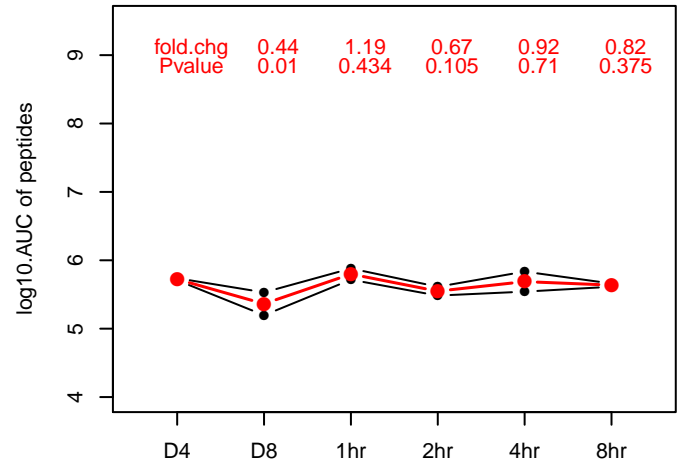

### ADDG\_HUMAN

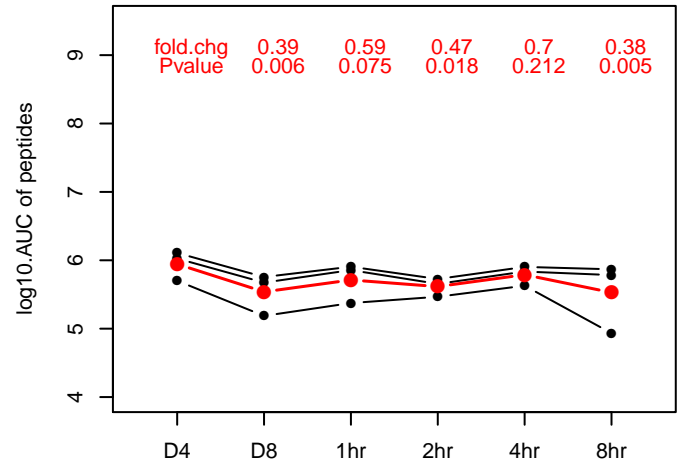

### ADNP\_HUMAN

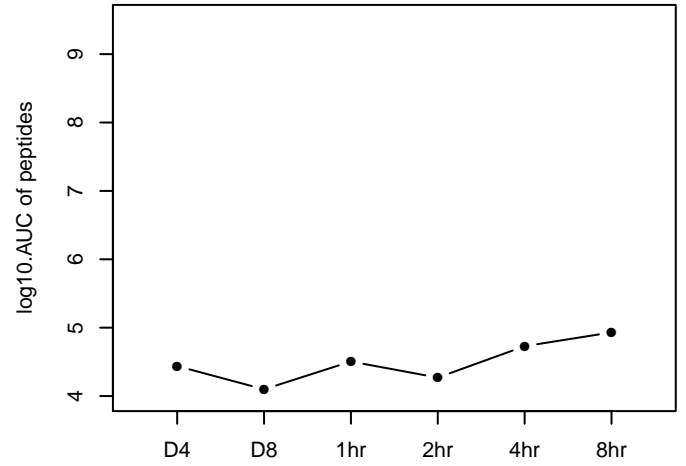

### ADT1\_HUMAN

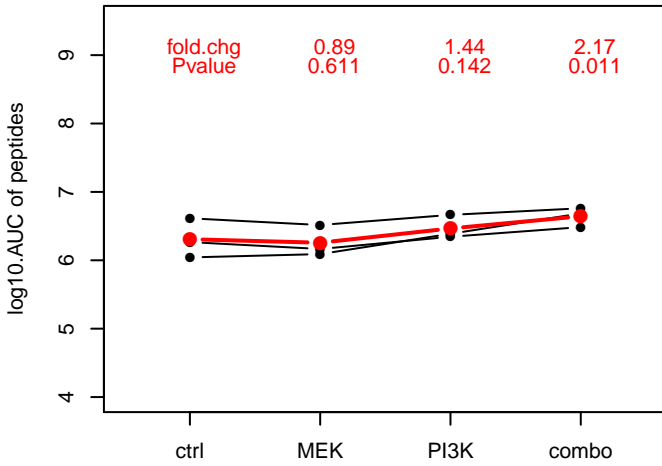

### ADT1\_HUMAN

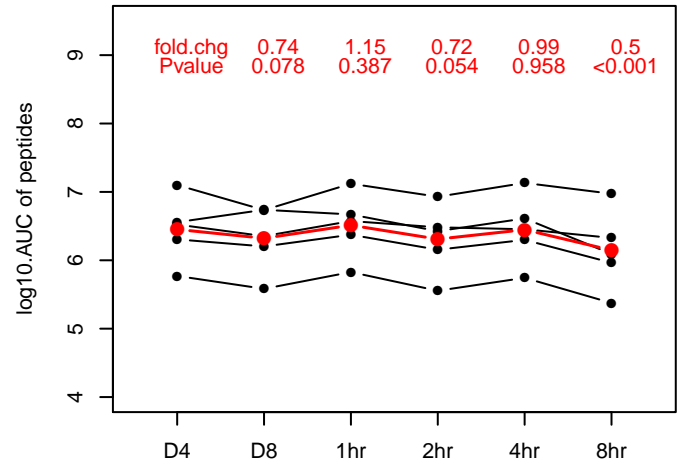

### ADT3\_HUMAN

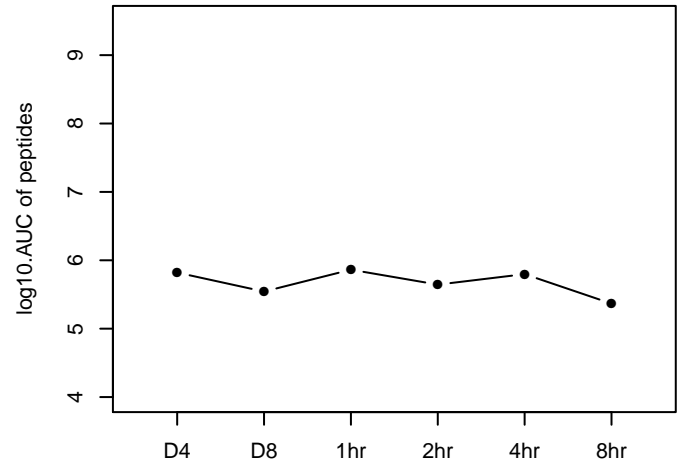



### AFAD\_HUMAN

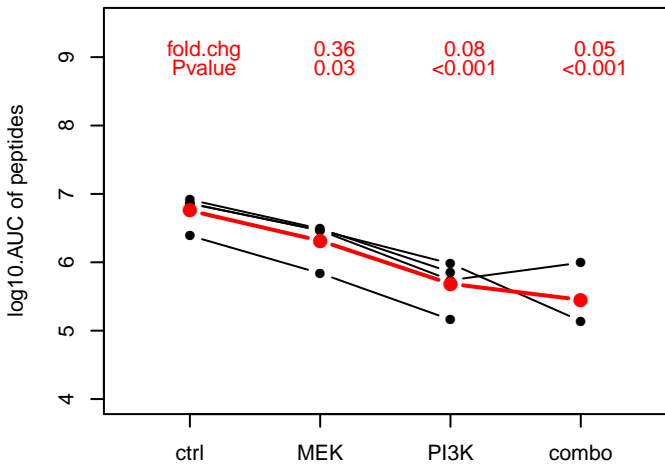

### AFAD\_HUMAN

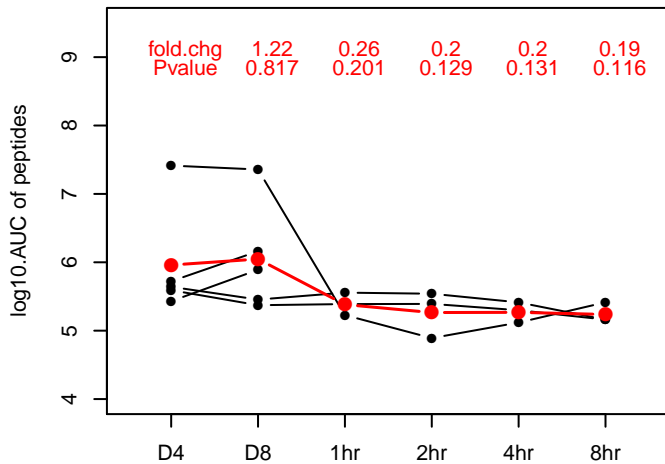

### AFF4\_HUMAN

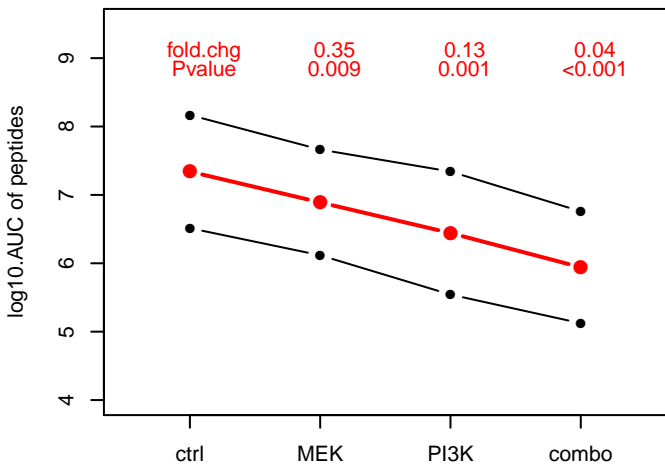

### AFF4\_HUMAN

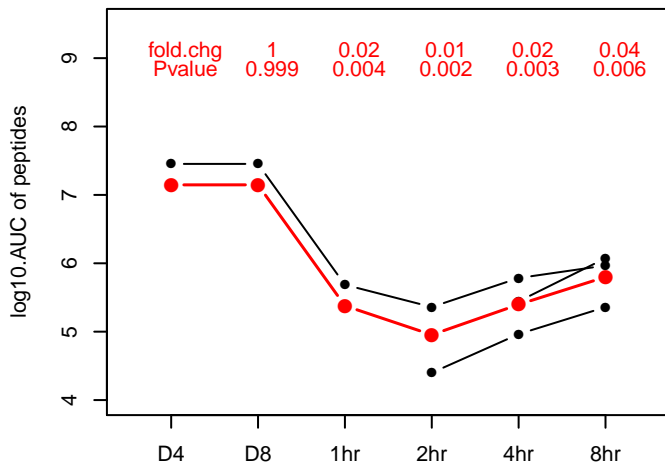

### AGAP1\_HUMAN

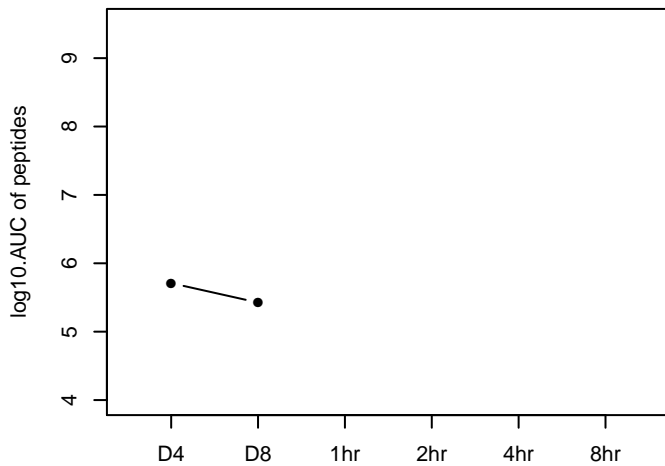

### AIBP\_HUMAN

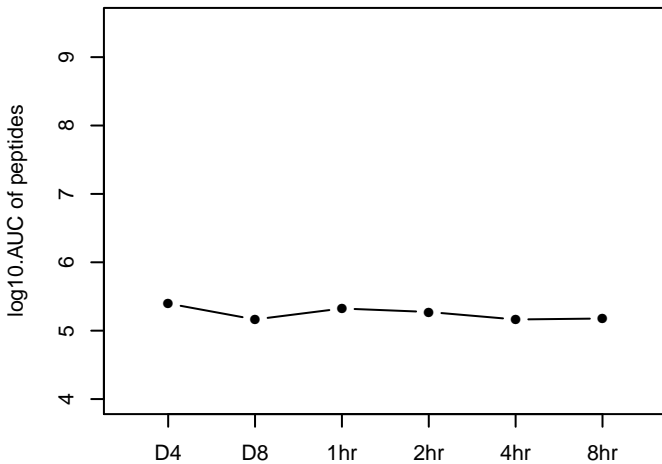

### AKA12\_HUMAN

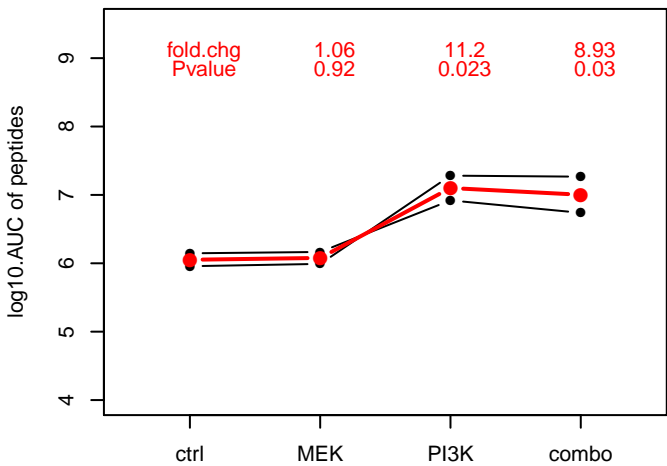

### AKA12\_HUMAN

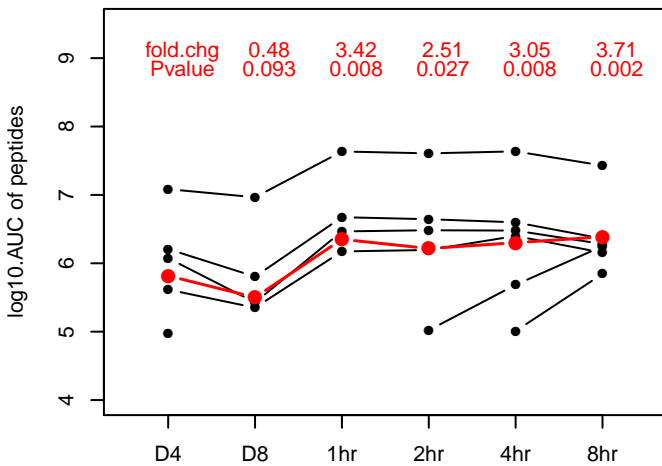

### AKAP2\_HUMAN

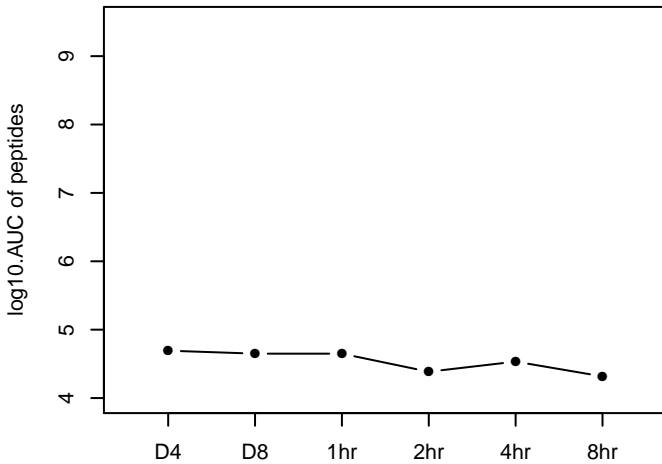

### AKP8L\_HUMAN

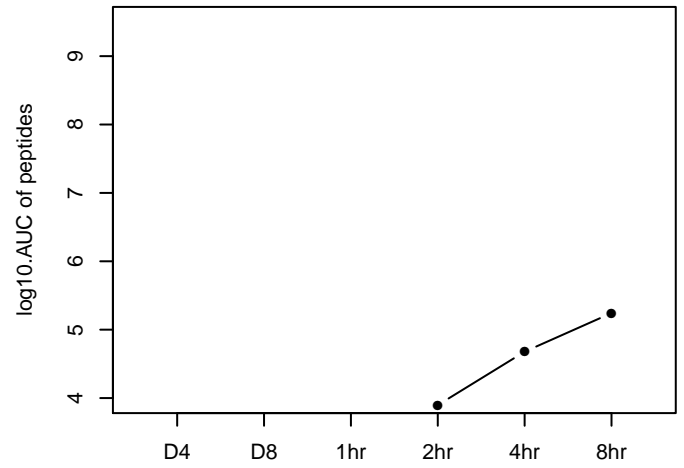

### AKT3\_HUMAN

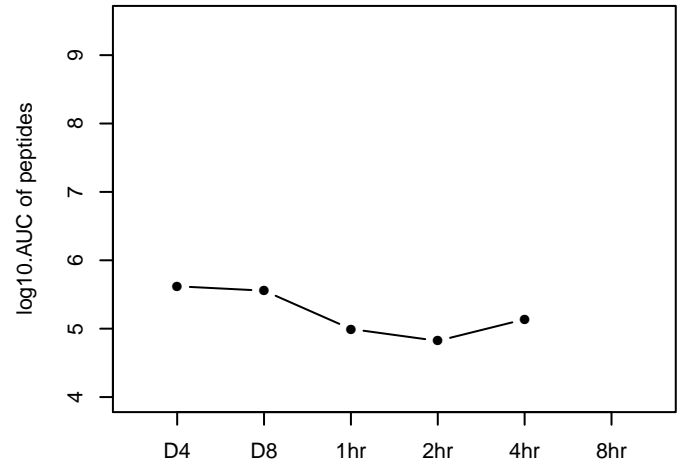

### ALDOA\_HUMAN

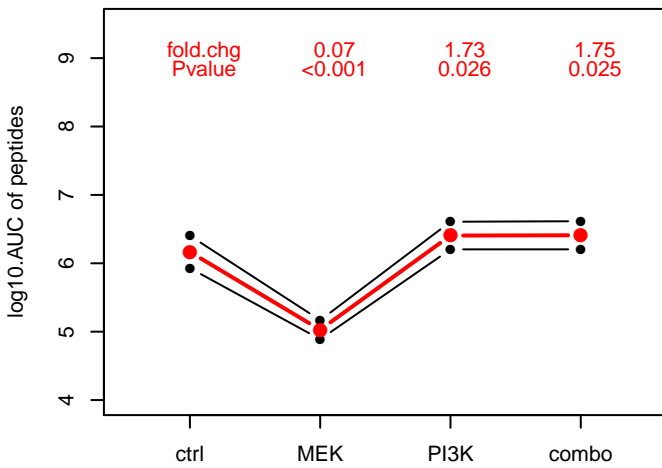

### ALDOA\_HUMAN

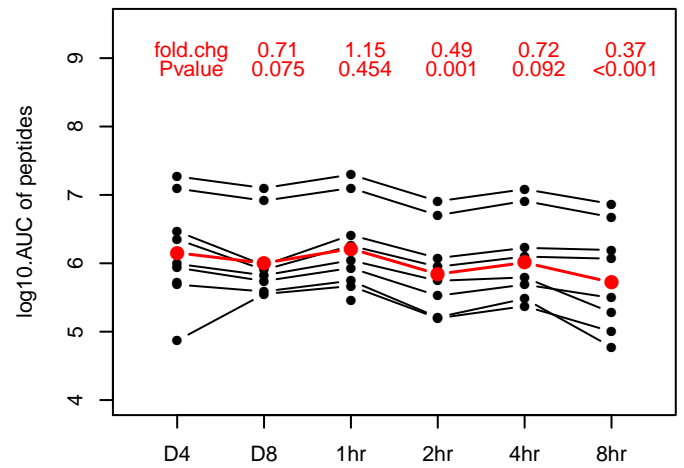

### ALDOC\_HUMAN

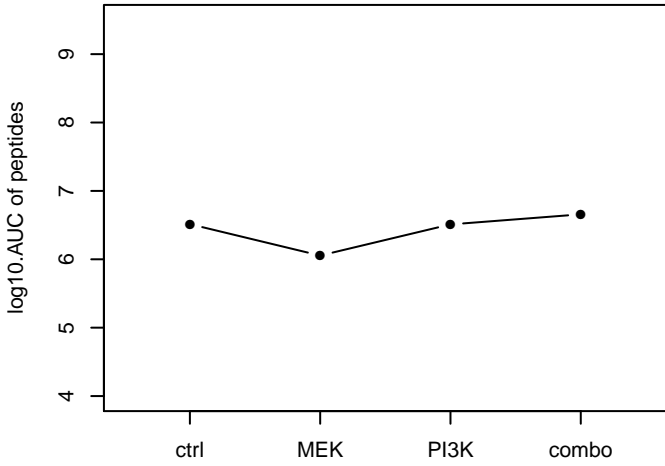

### ALDOC\_HUMAN

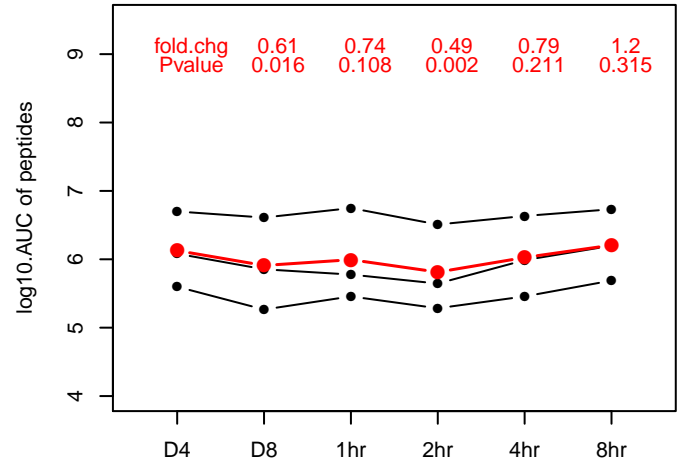

### ALS2\_HUMAN

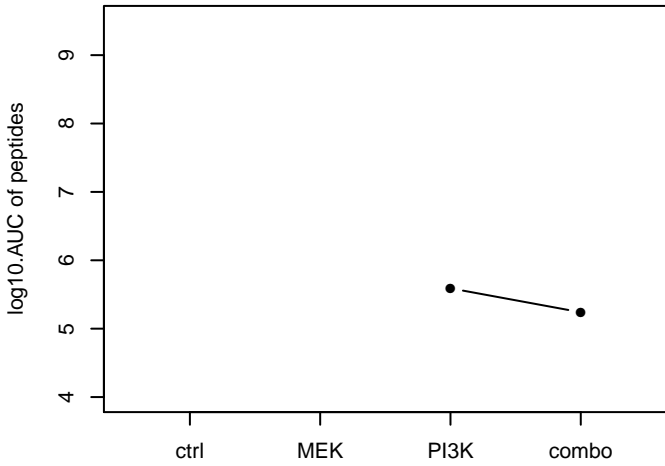

### ALS2\_HUMAN

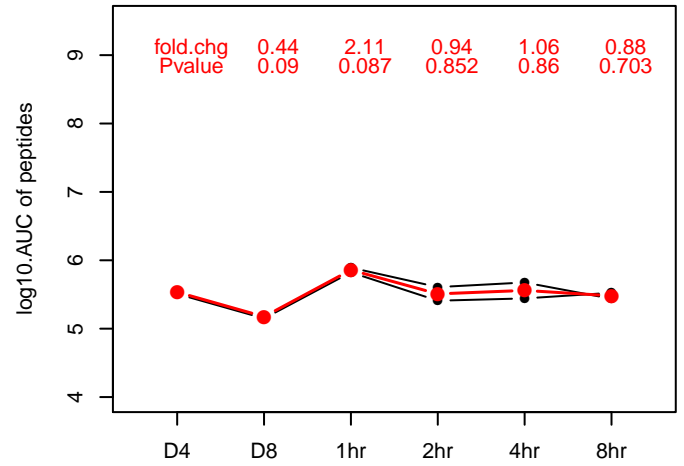

### AMPD2\_HUMAN

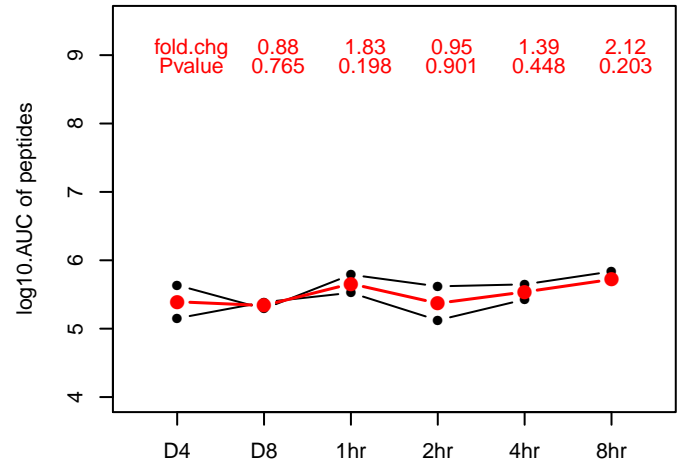

### AMPM1\_HUMAN

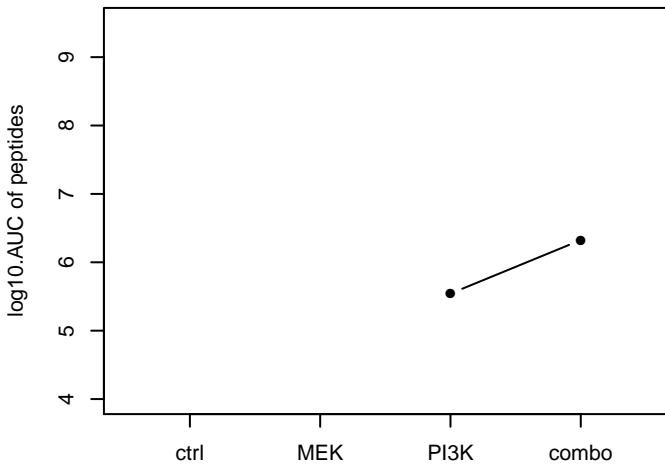

### AMPM1\_HUMAN

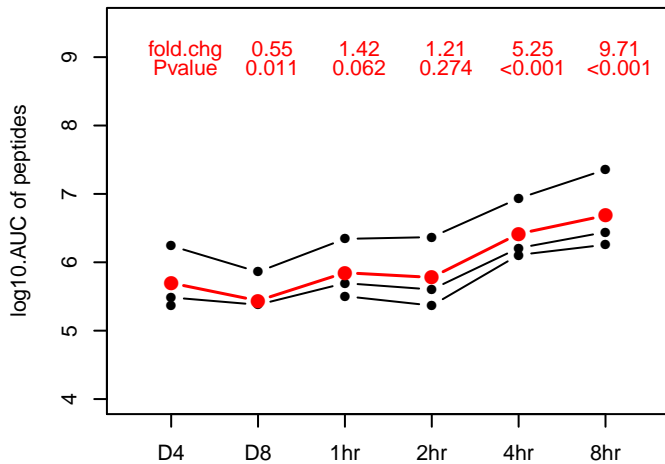

### AMRA1\_HUMAN

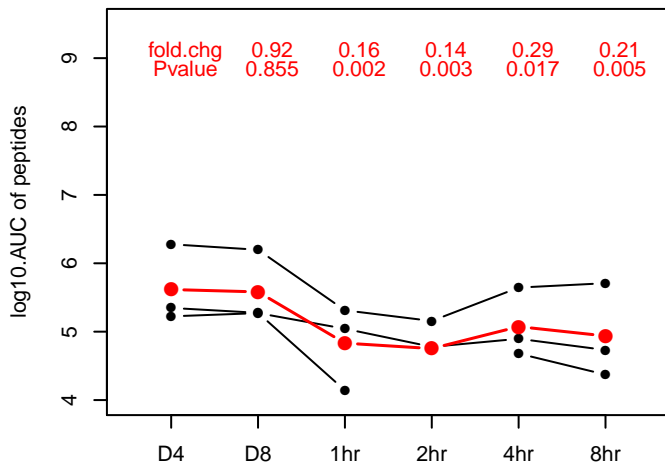

### ANKY2\_HUMAN

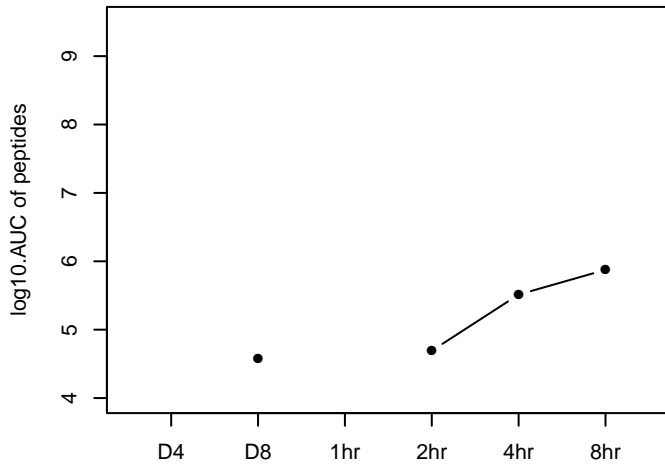

**ANLN\_HUMAN**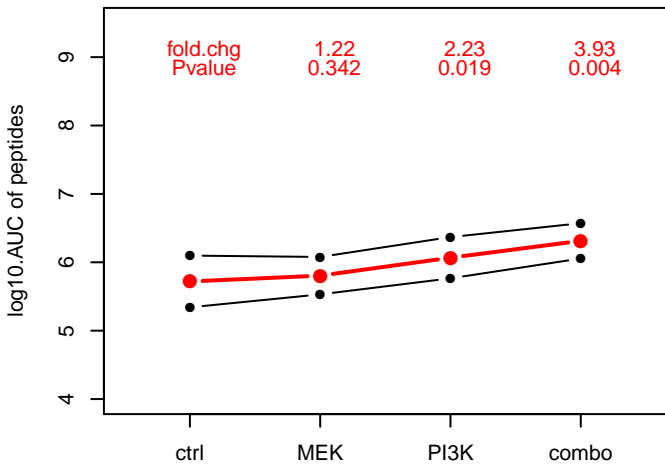**ANLN\_HUMAN**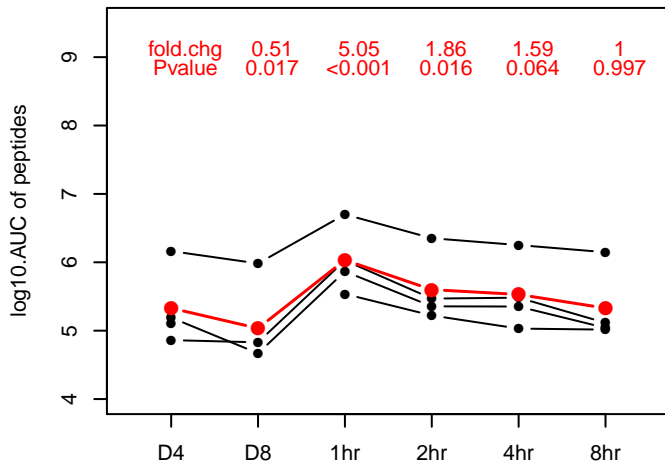**ANR12\_HUMAN**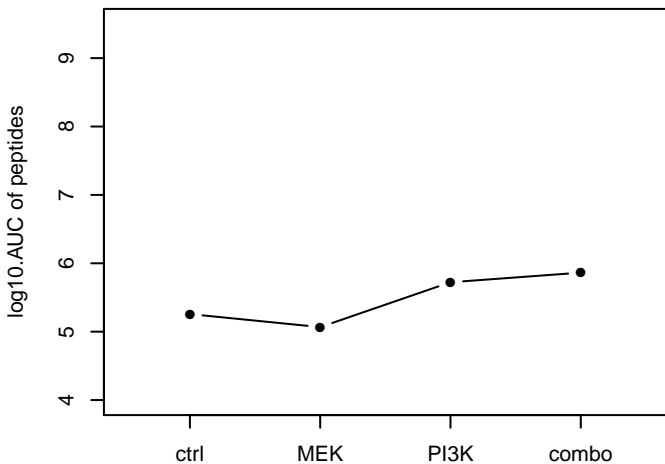**ANR12\_HUMAN**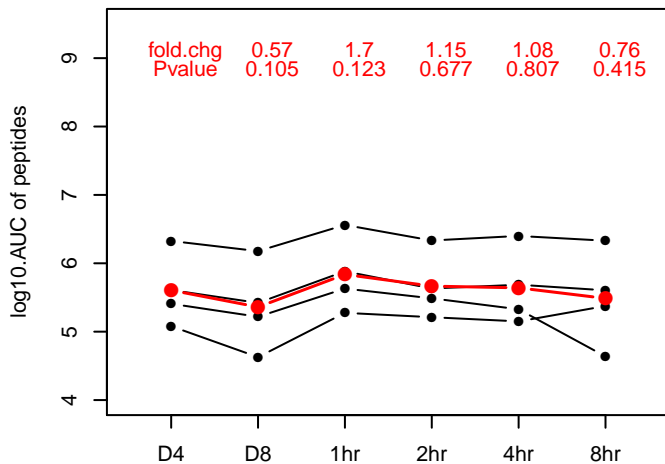**ANS1A\_HUMAN**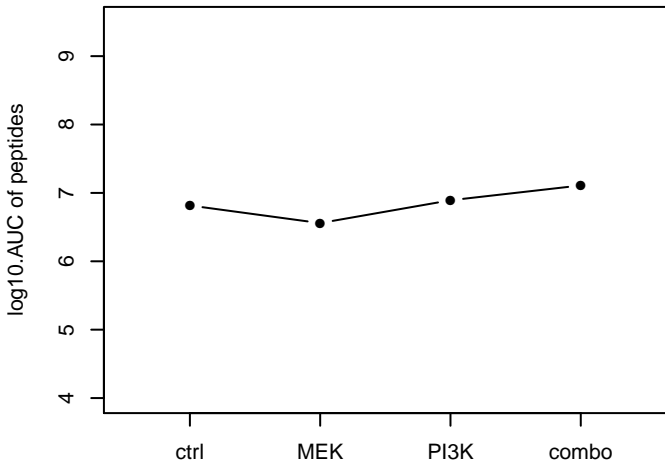**ANS1A\_HUMAN**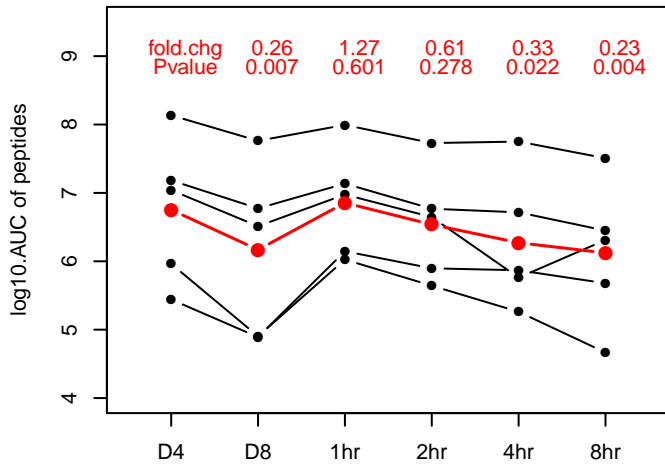

### APC\_HUMAN

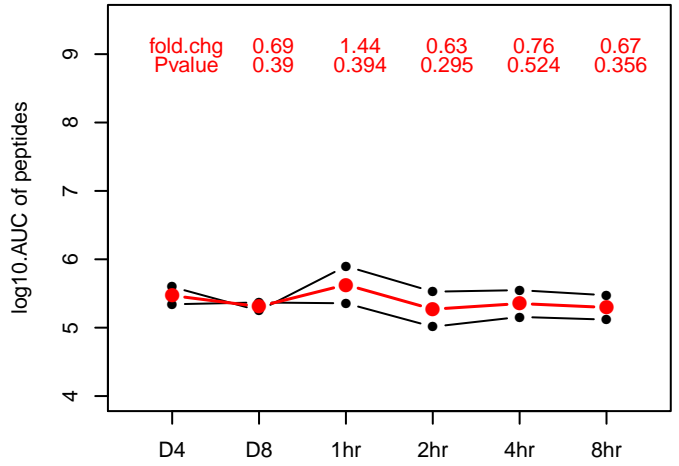

### APC1\_HUMAN

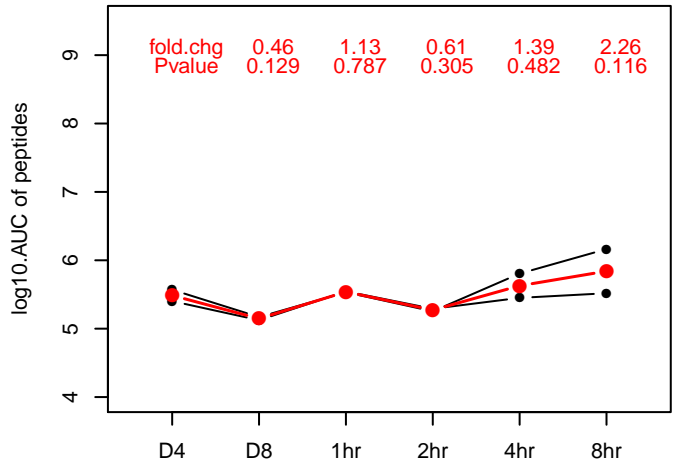

### APOA1\_HUMAN

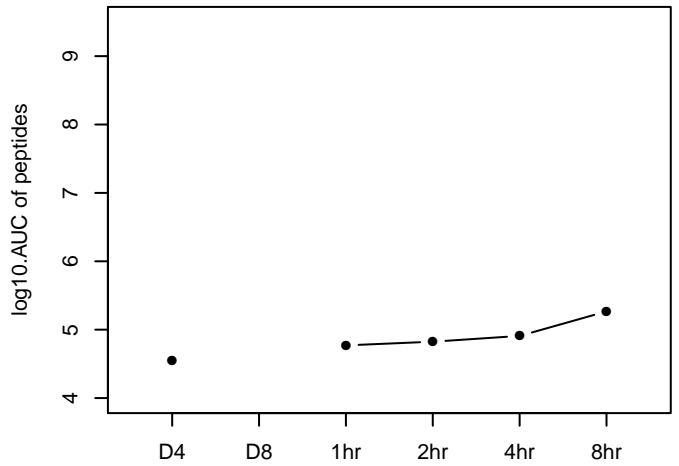

### AQR\_HUMAN

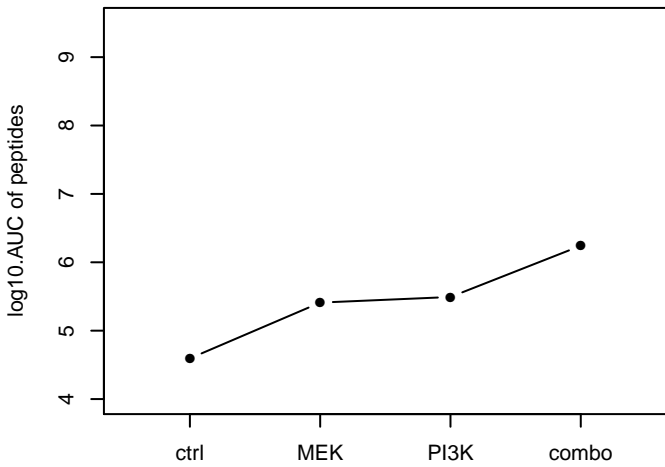

### ARC1B\_HUMAN

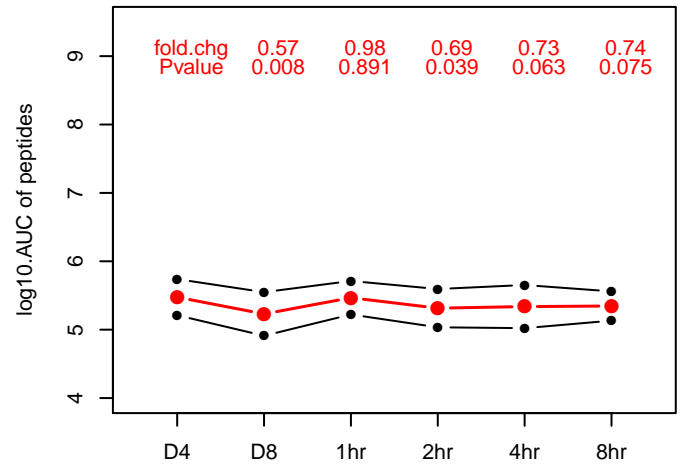

### ARFG2\_HUMAN

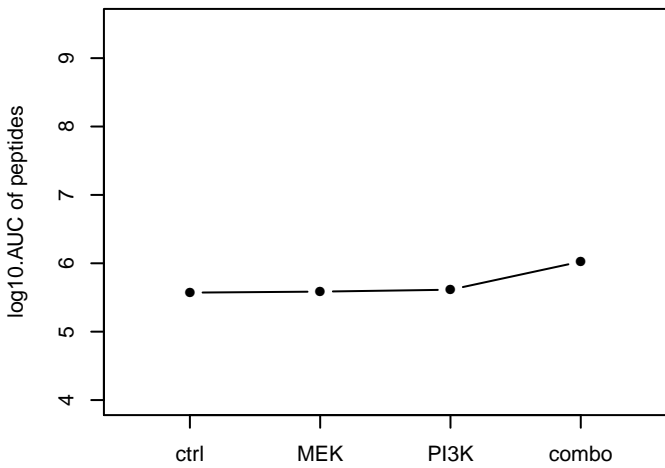

### ARFG2\_HUMAN

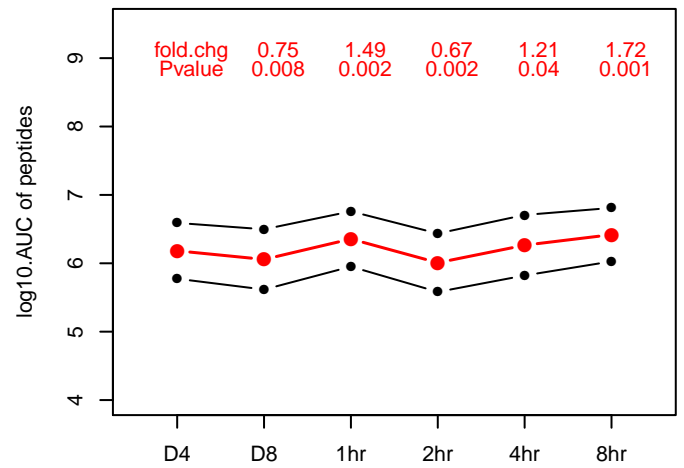



**ARHG2\_HUMAN**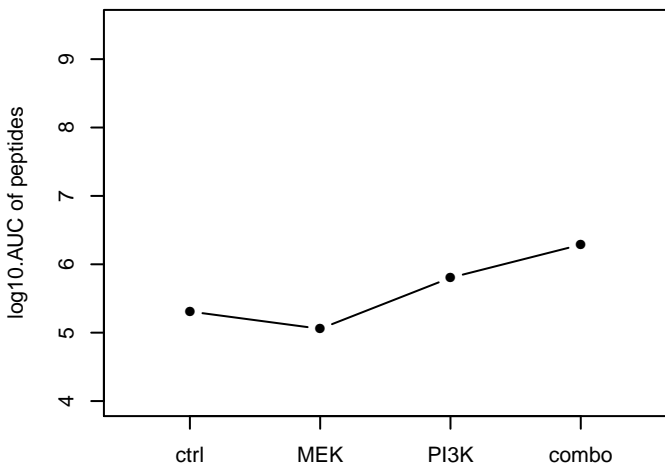**ARHG2\_HUMAN**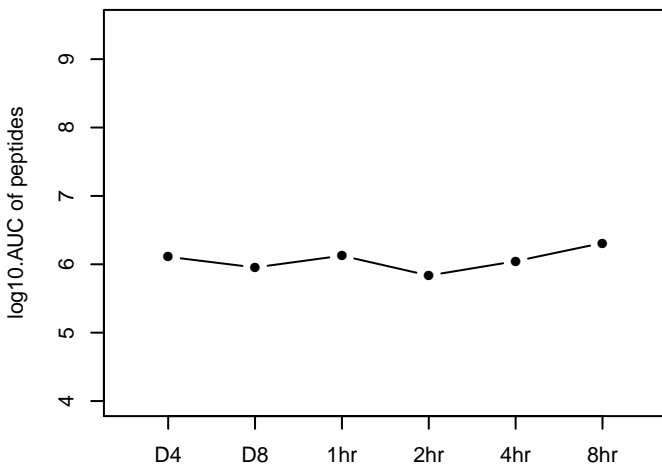**ARHGB\_HUMAN**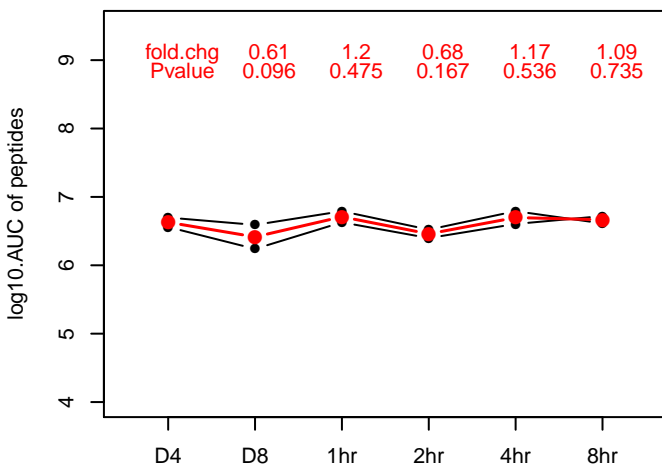**ARHGQ\_HUMAN**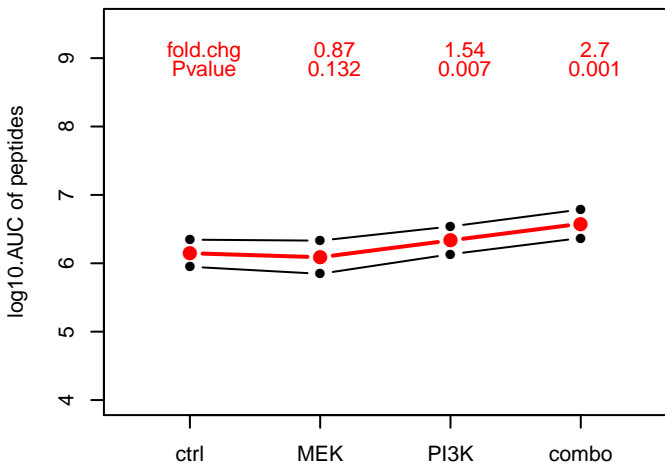**ARHGQ\_HUMAN**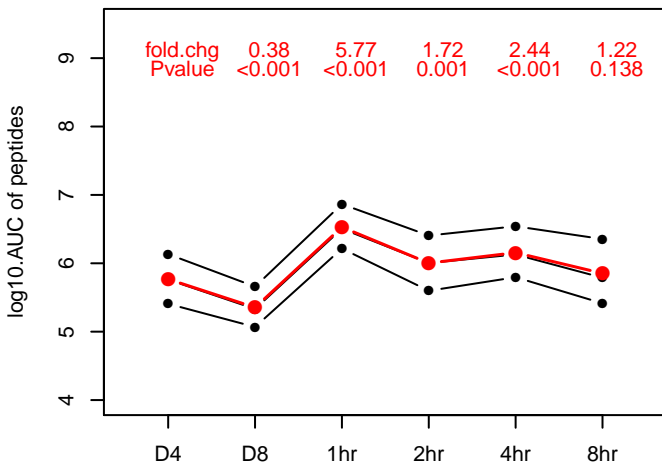

### ARI1A\_HUMAN

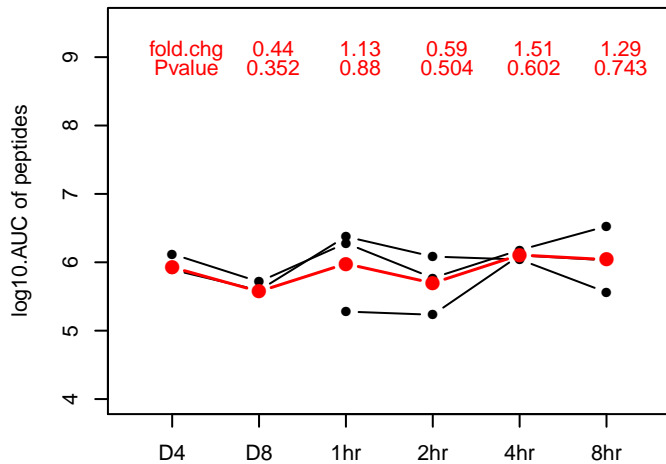

### ARI2\_HUMAN

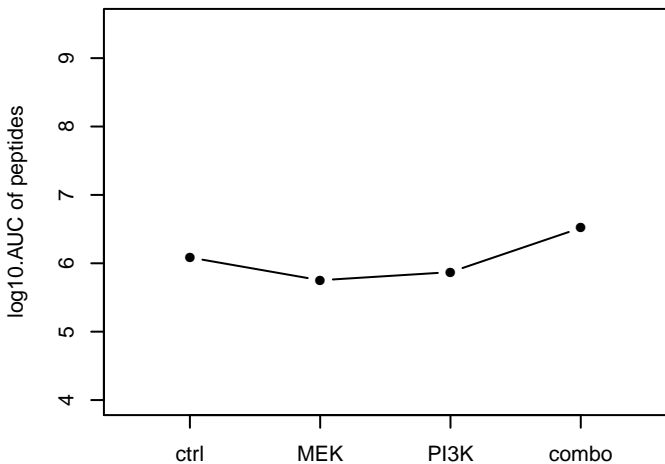

### ARI2\_HUMAN

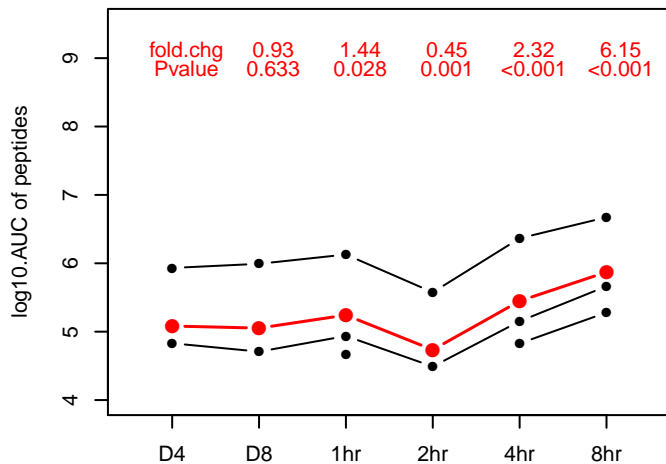

### ARNT\_HUMAN

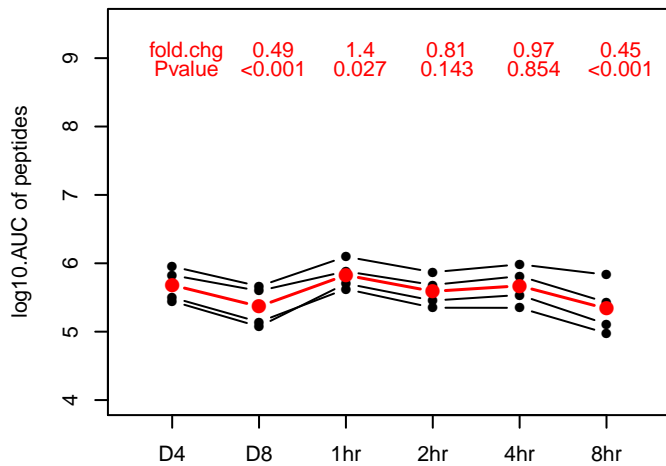

### ASXL2\_HUMAN

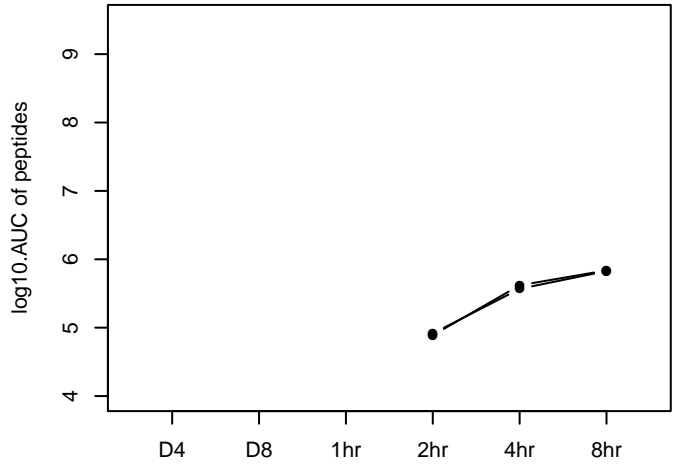

### AT11C\_HUMAN

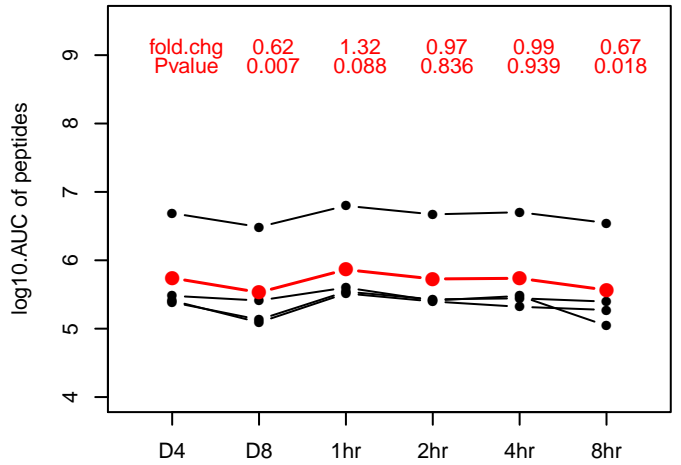

### AT12A\_HUMAN

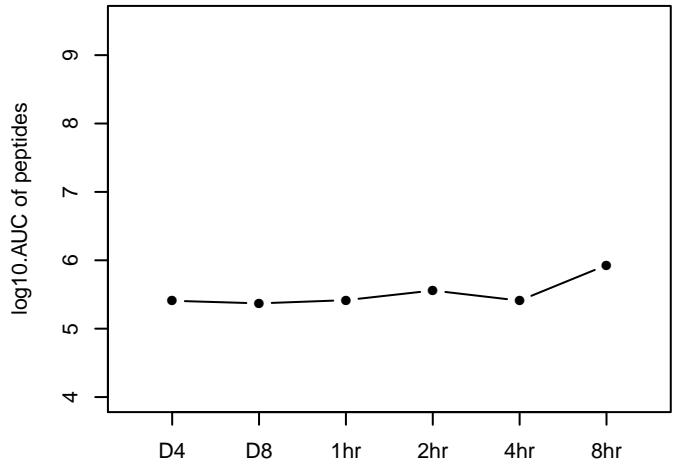

**AT133\_HUMAN**

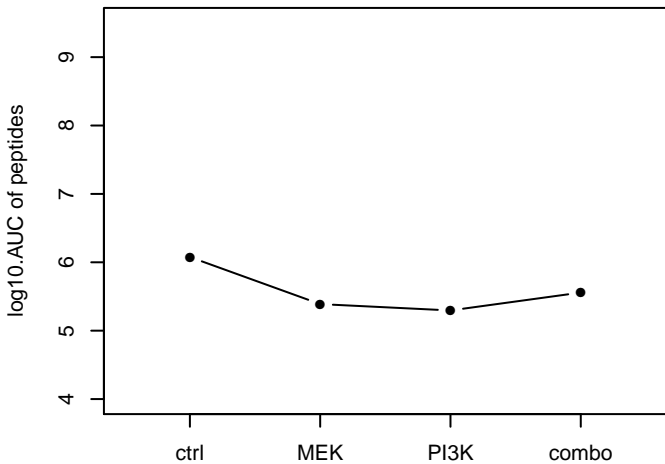

**AT133\_HUMAN**

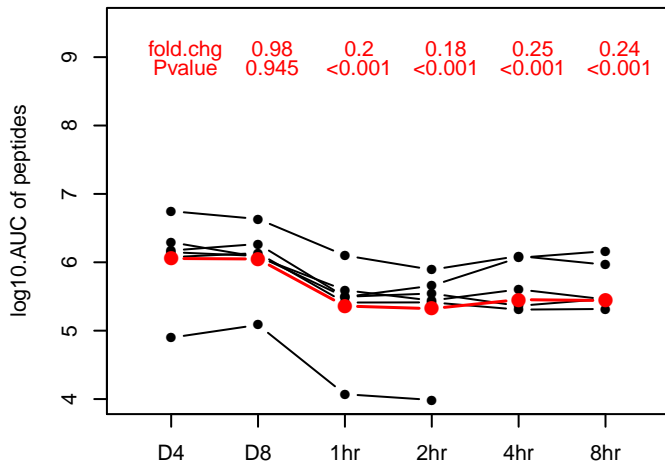

**AT1A1\_HUMAN**

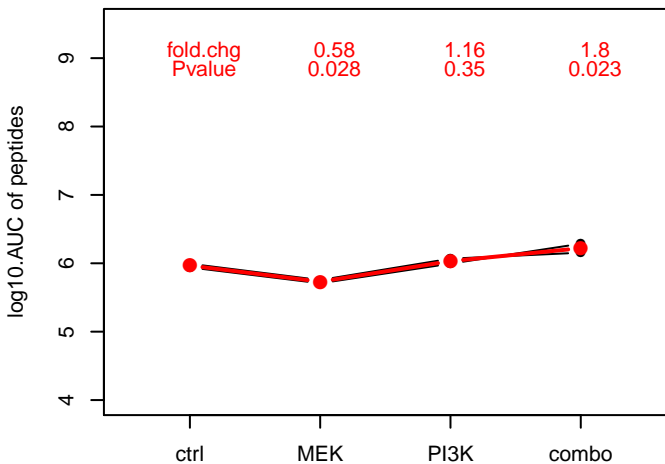

**AT1A1\_HUMAN**

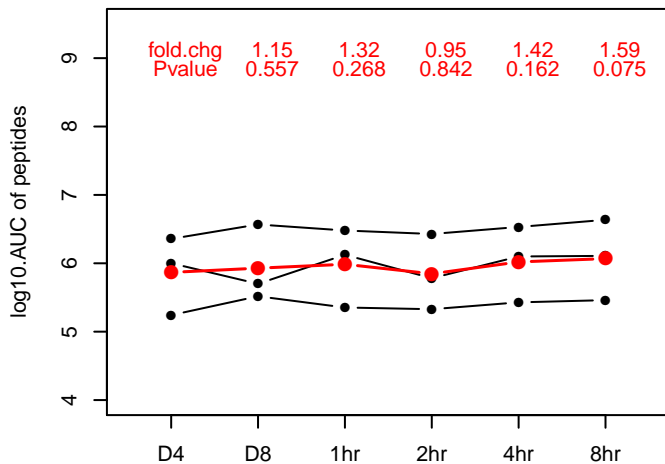

**AT5F1\_HUMAN**

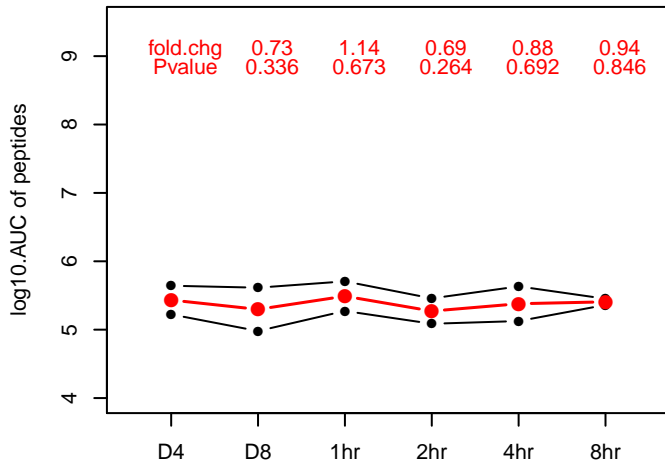

**ATAD2\_HUMAN**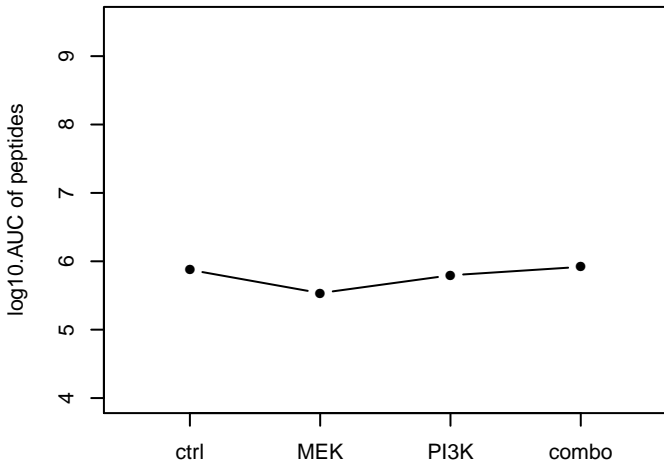**ATE1\_HUMAN**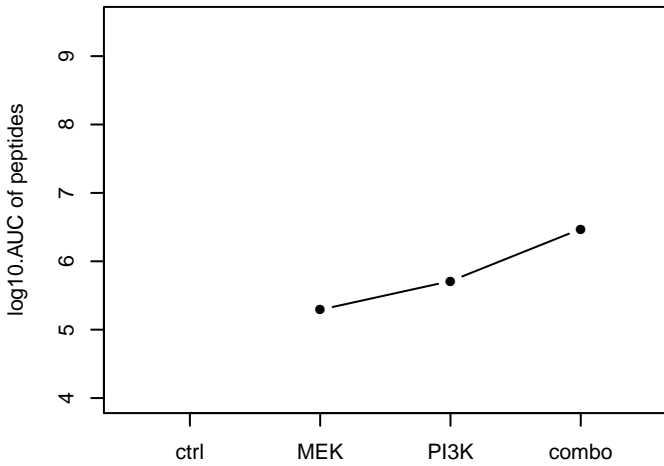**ATE1\_HUMAN**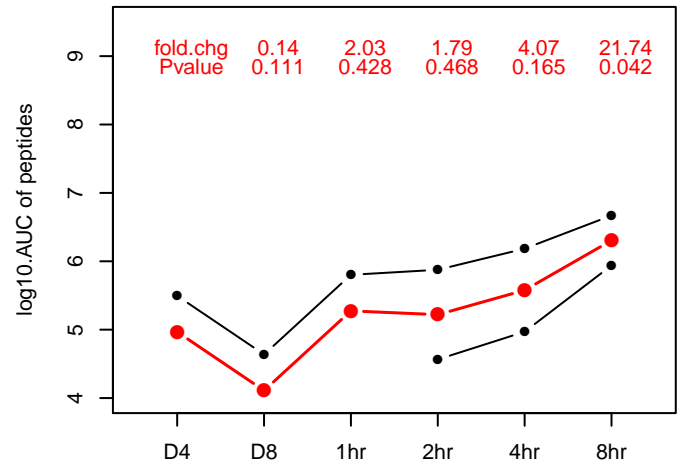**ATF7\_HUMAN**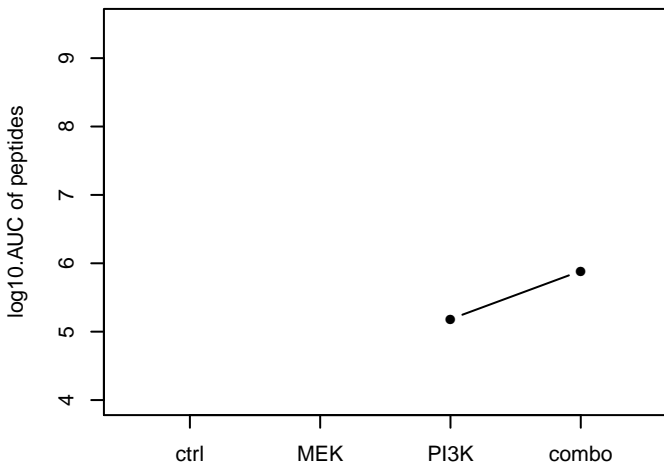**ATF7\_HUMAN**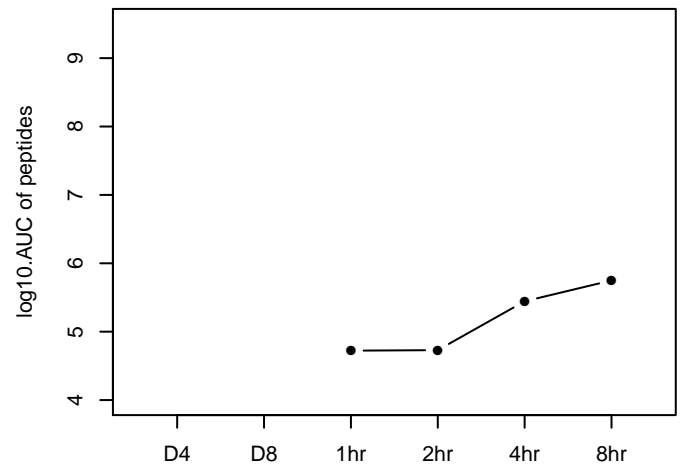

**ATM\_HUMAN**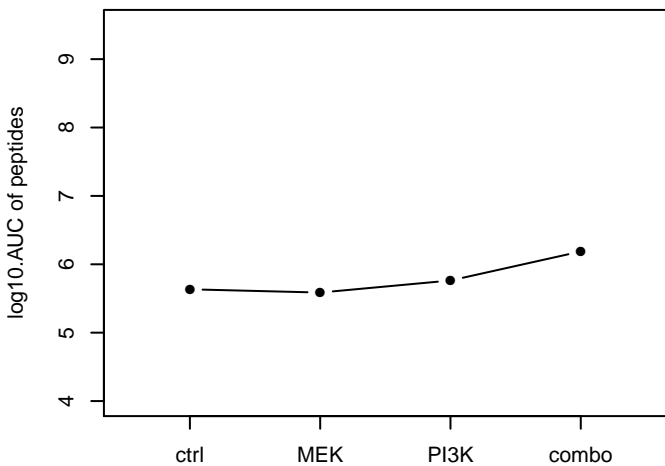**ATM\_HUMAN**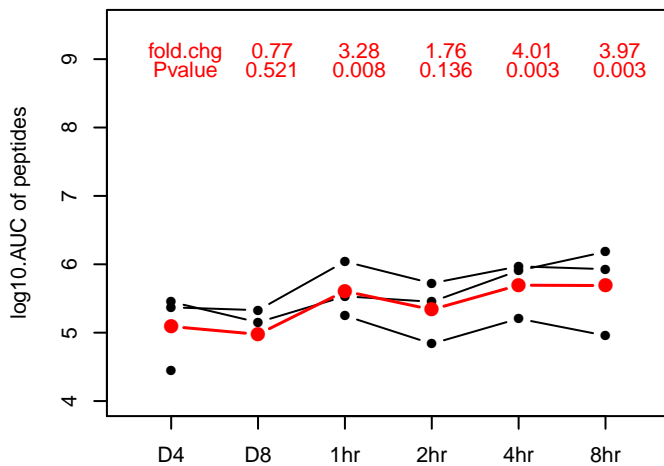**ATPA\_HUMAN**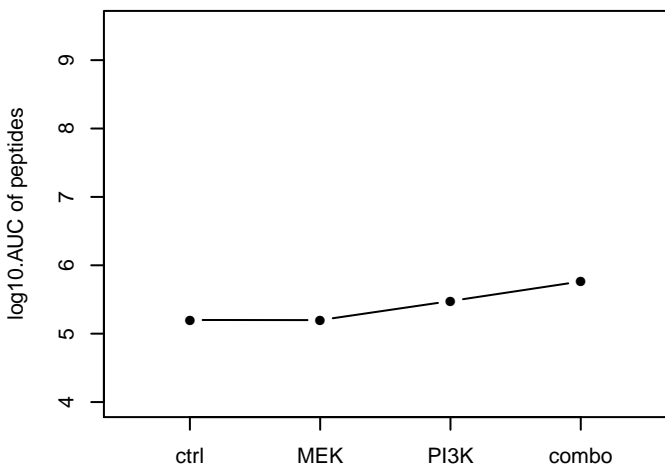**ATPA\_HUMAN**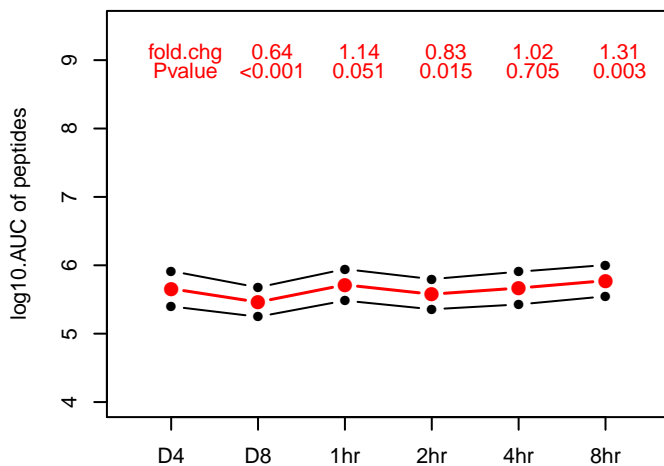**ATRX\_HUMAN**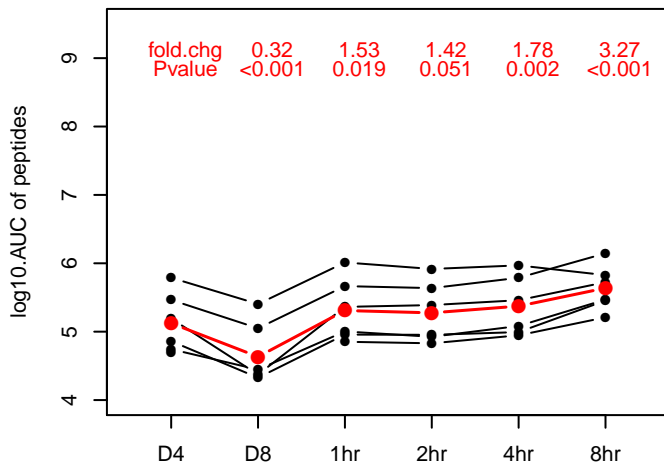

### ATX2L\_HUMAN

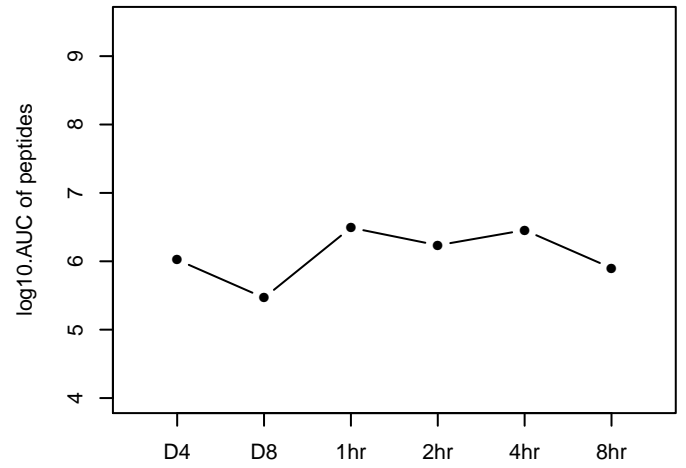

### B2R9R2\_HUMAN

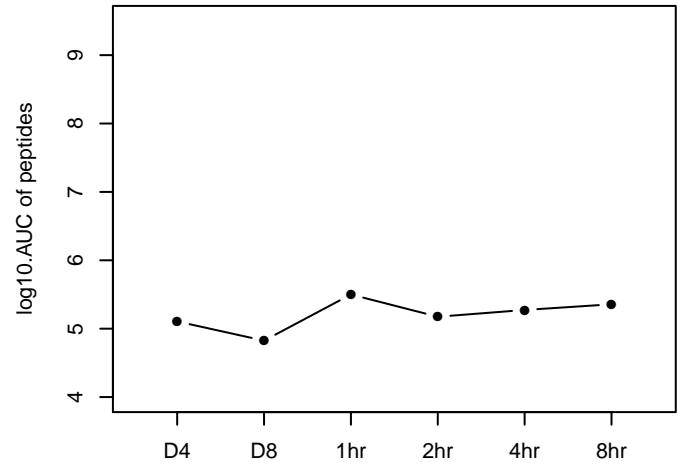

### B2RDE1\_HUMAN

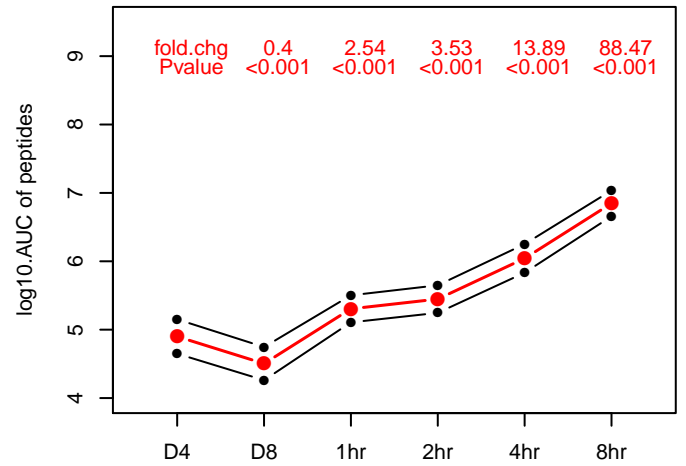

**B2RE15\_HUMAN**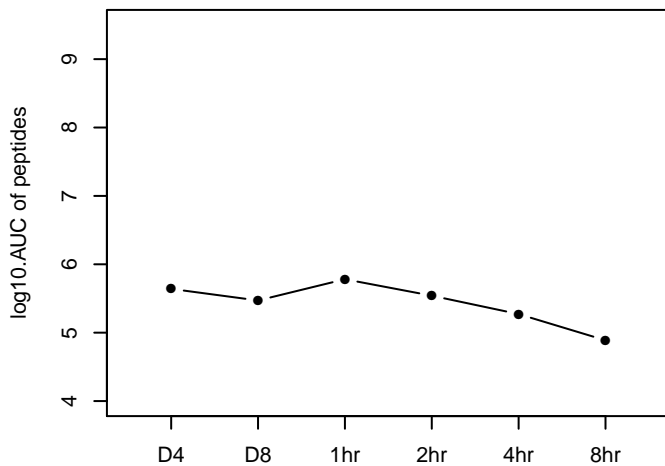**B4DJT8\_HUMAN**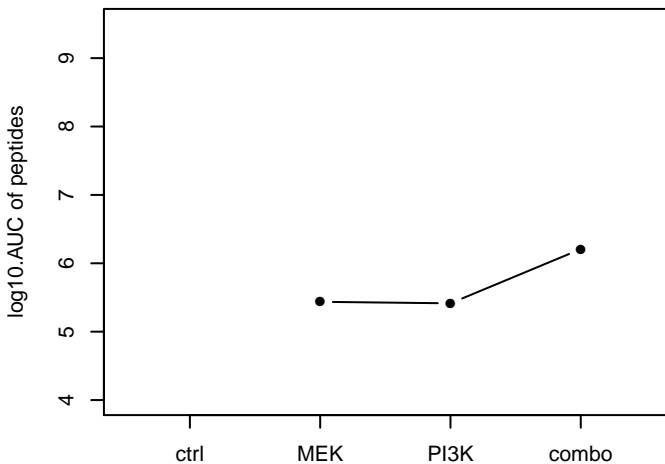**B4DJT8\_HUMAN**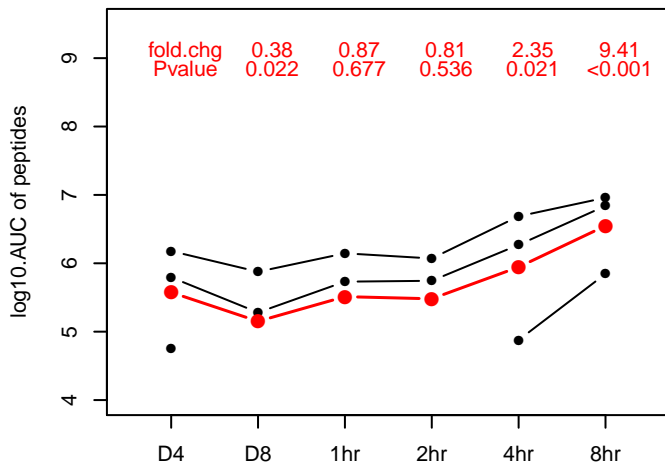**B4DLZ5\_HUMAN**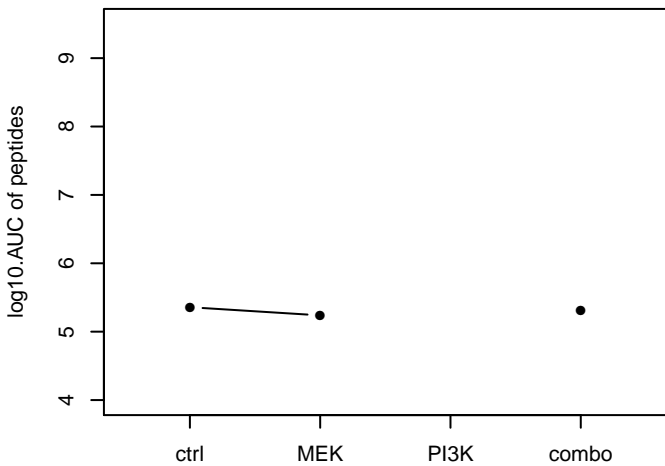



### B4DSP3\_HUMAN

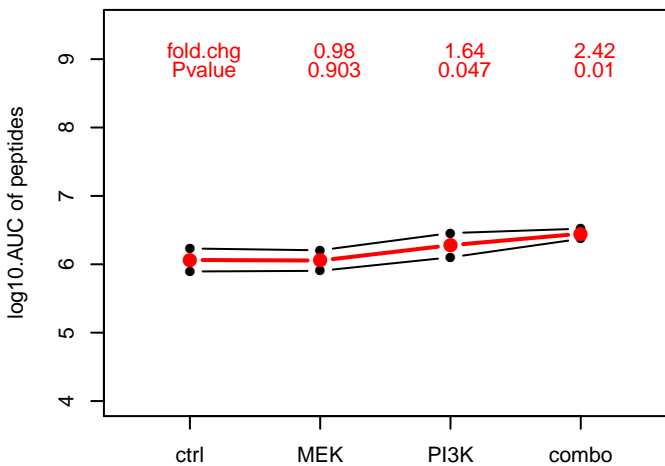

### B4DSP3\_HUMAN

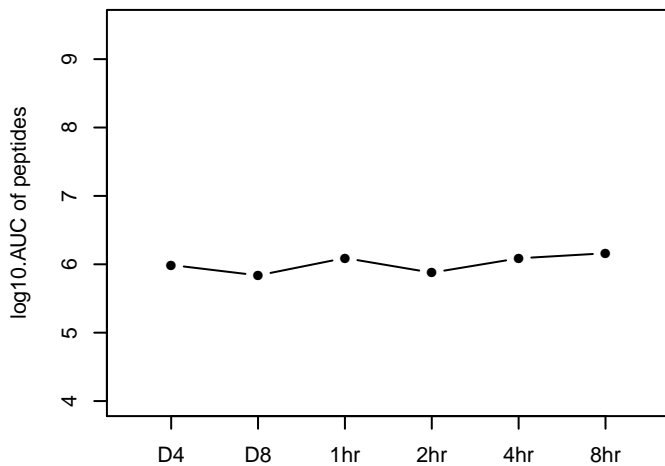

### B4DZW7\_HUMAN

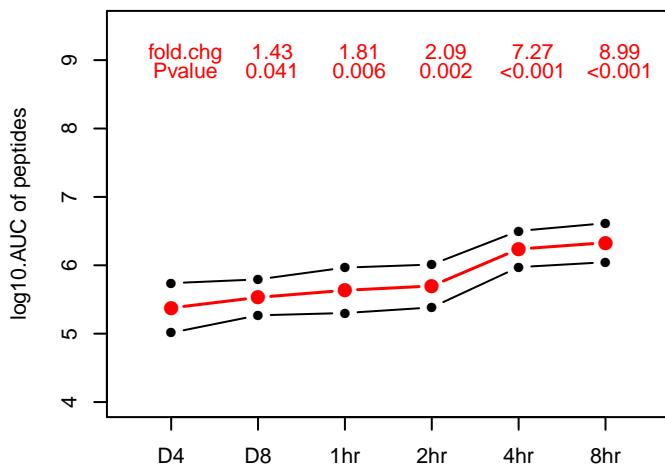

### BAZ1B\_HUMAN

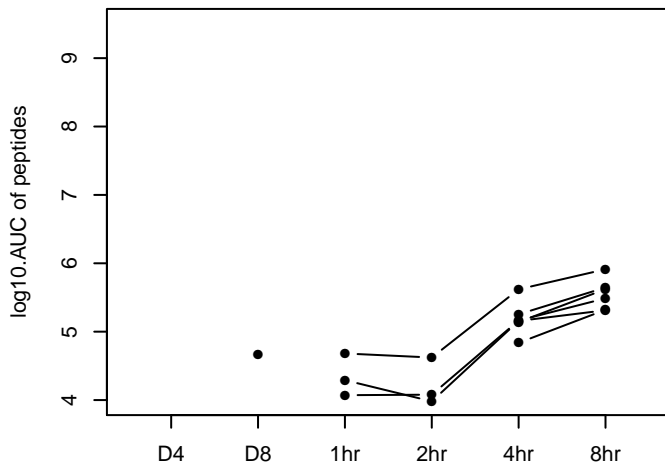

### BBX\_HUMAN

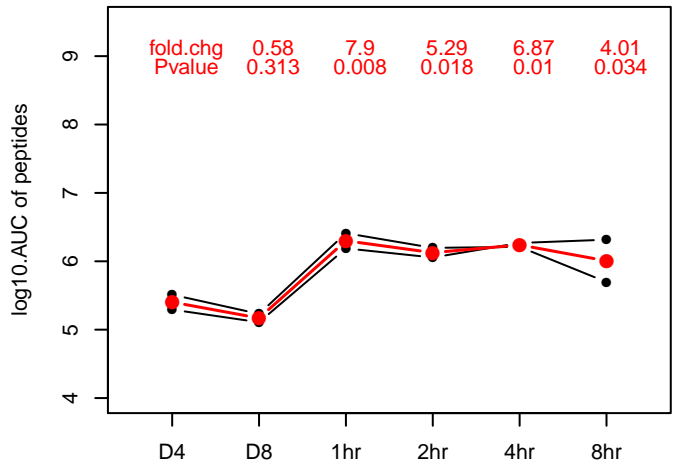

### BCL9\_HUMAN

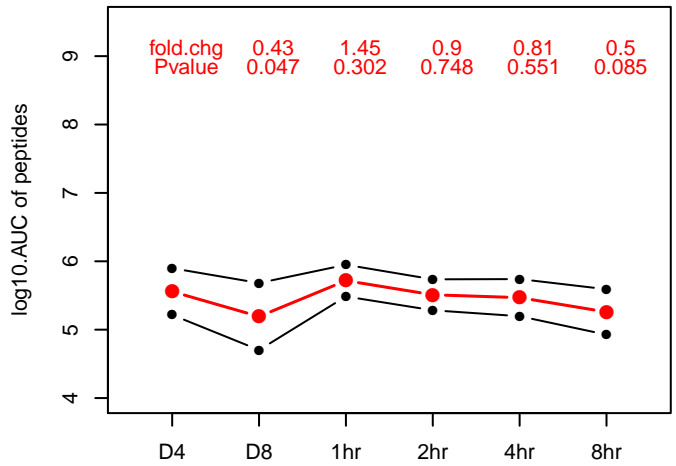

### BCLF1\_HUMAN

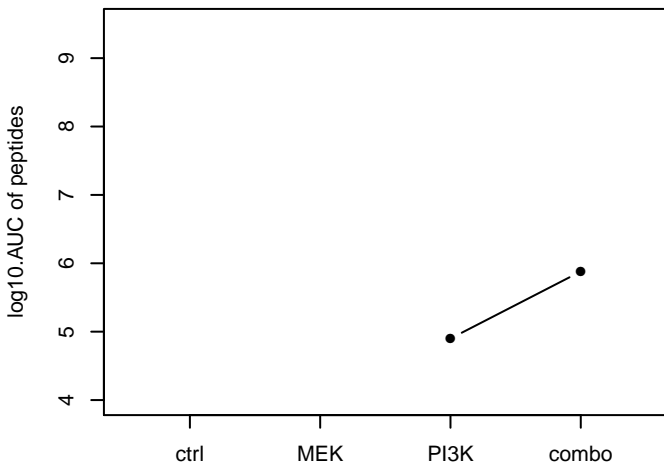

### BCLF1\_HUMAN

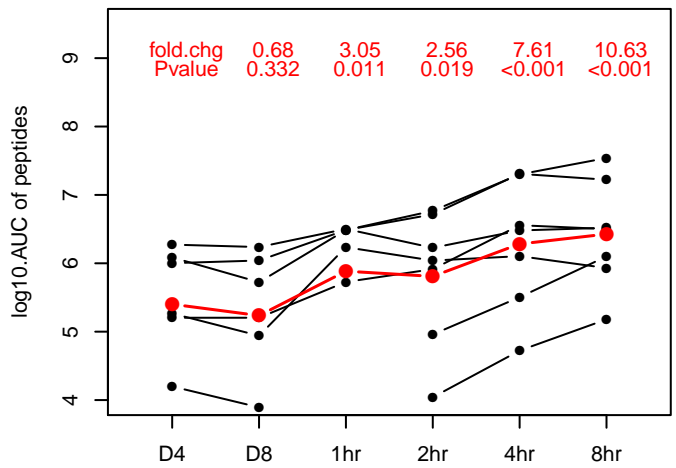

**BCR\_HUMAN**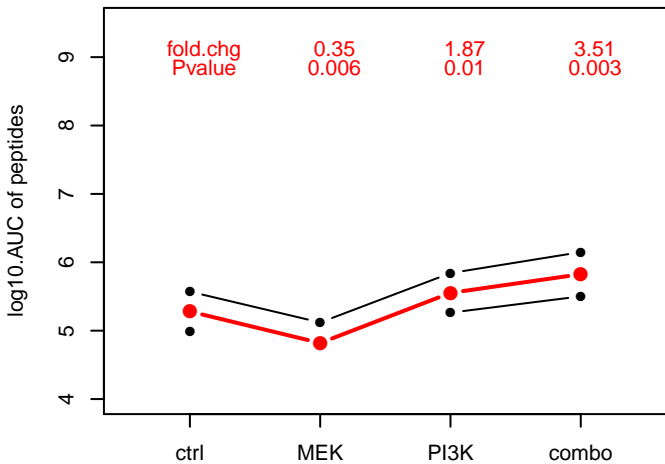**BCR\_HUMAN**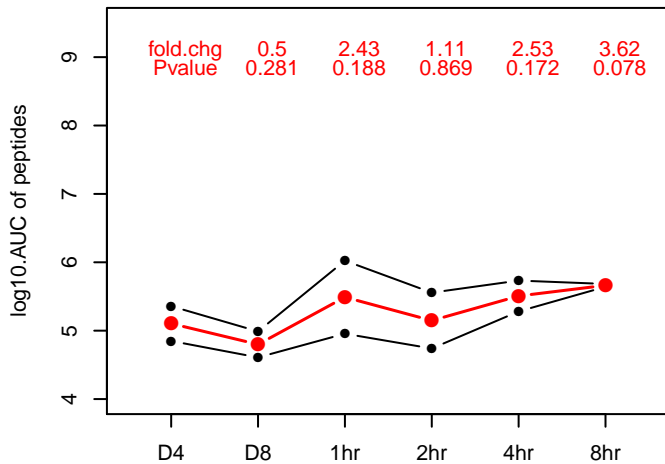**BET1\_HUMAN**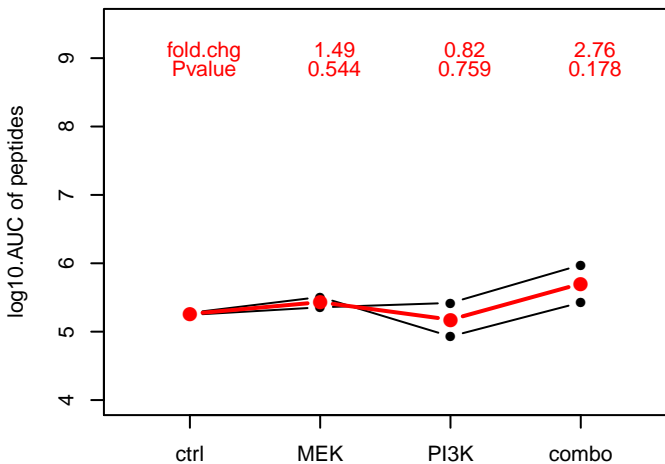**BET1\_HUMAN**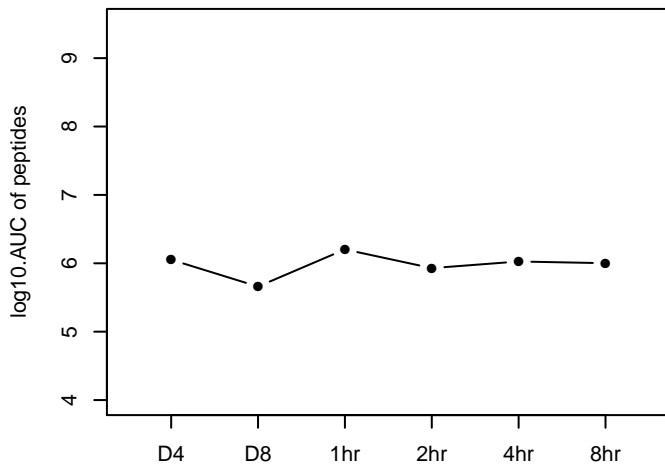**BICD2\_HUMAN**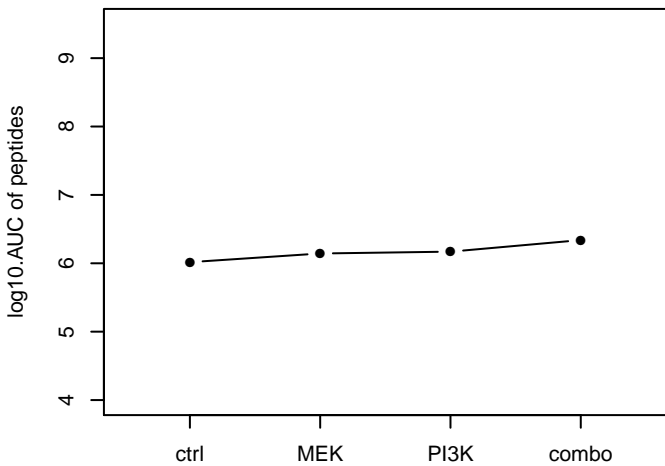**BICD2\_HUMAN**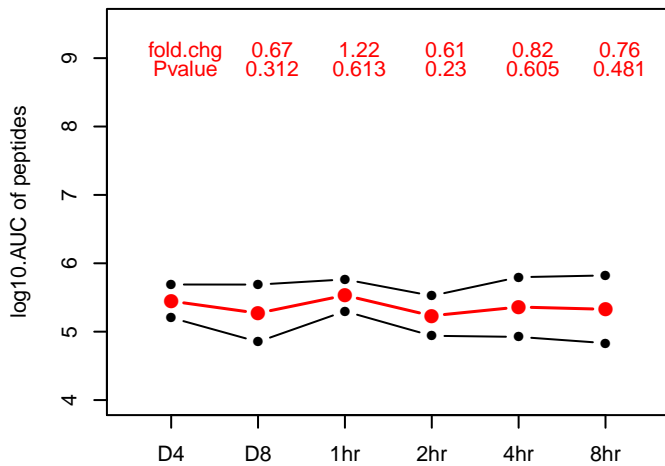

### BIG1\_HUMAN

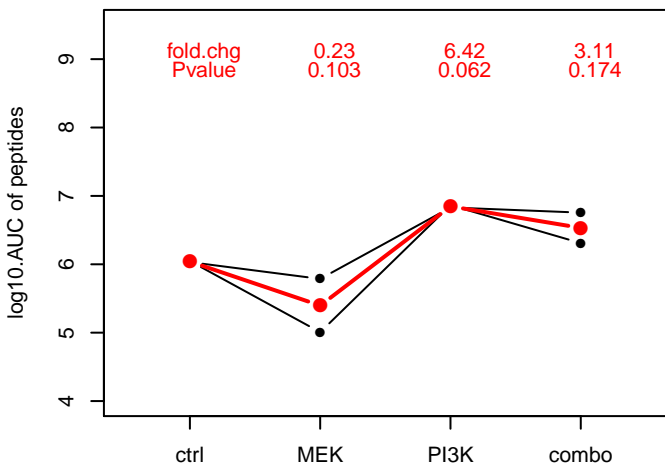

### BIG1\_HUMAN

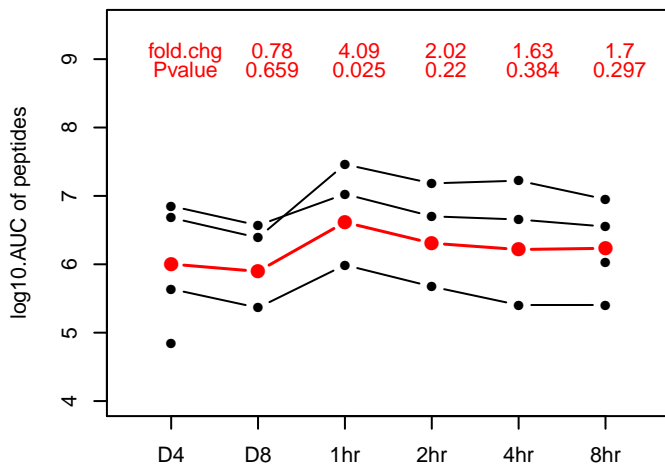

### BIG2\_HUMAN

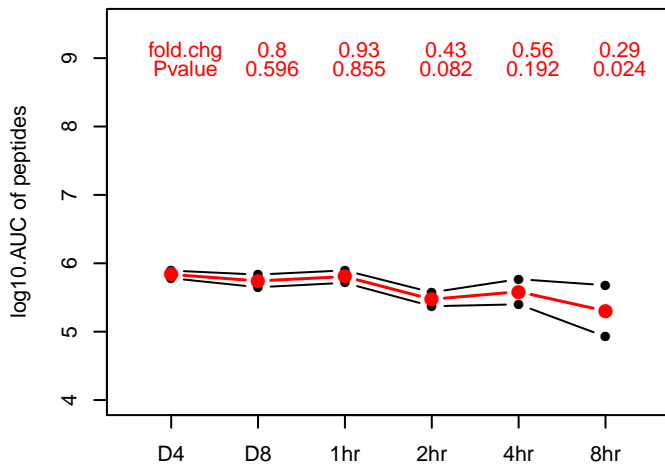

### BMP2K\_HUMAN

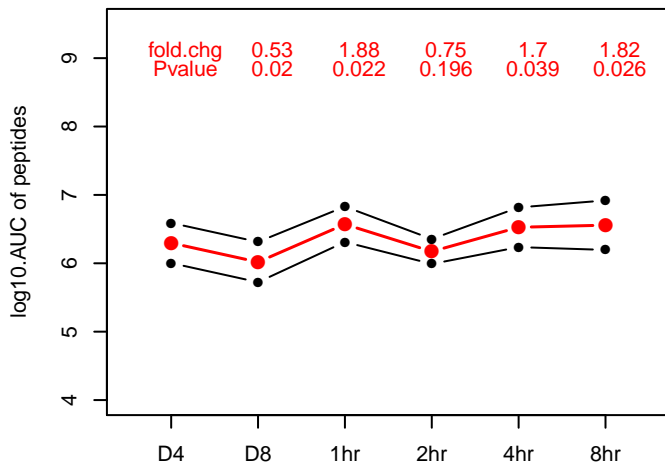

### BMS1\_HUMAN

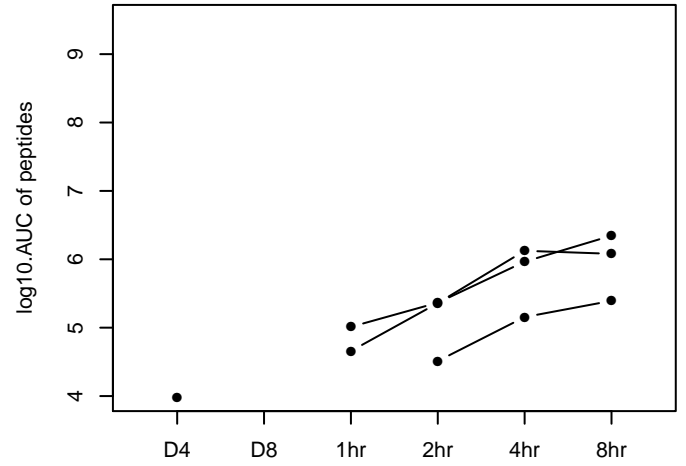

### BOD1L\_HUMAN

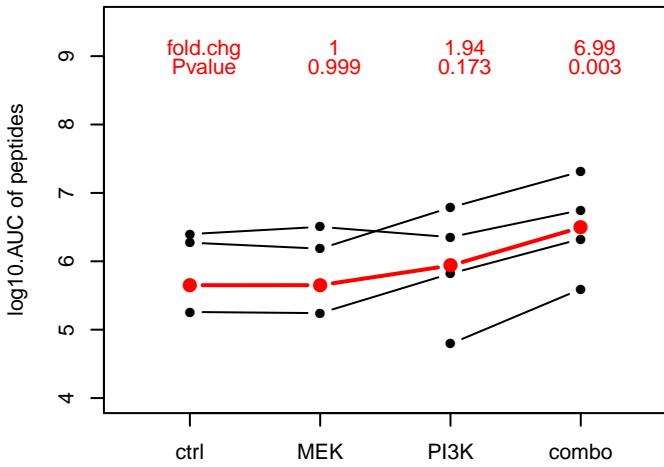

### BOD1L\_HUMAN

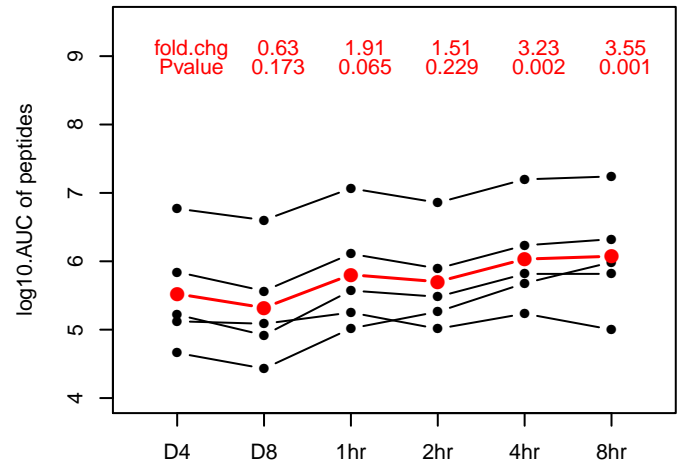

### BOREA\_HUMAN

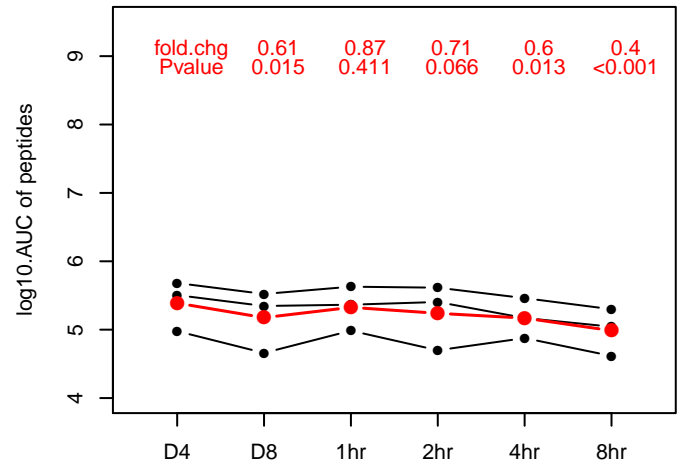

**BPTF\_HUMAN**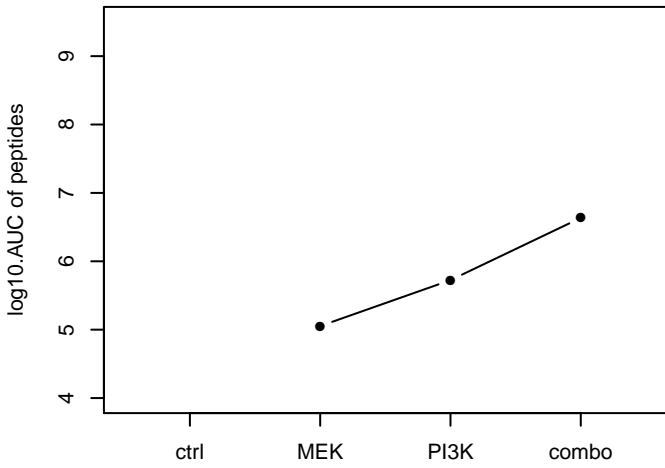**BPTF\_HUMAN**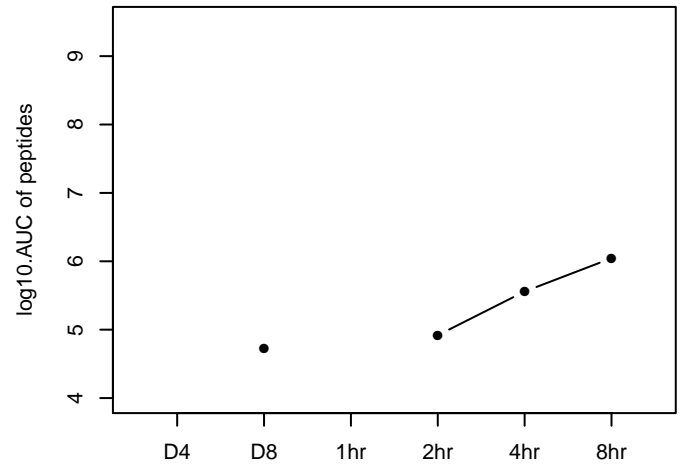**BRCA1\_HUMAN**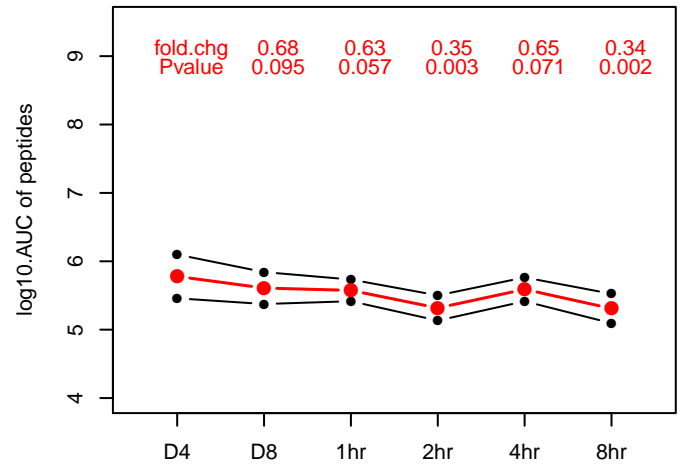**BRCA2\_HUMAN**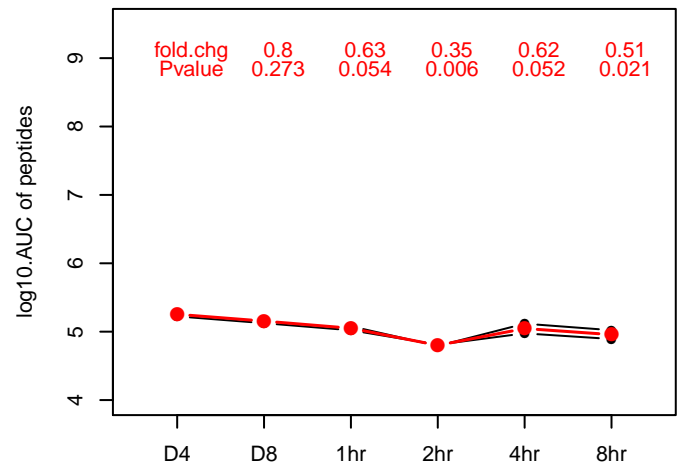

### BRD8\_HUMAN

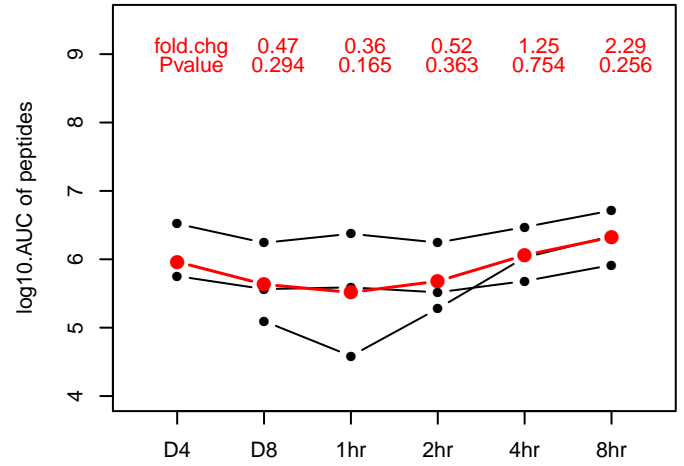

### BUB1\_HUMAN

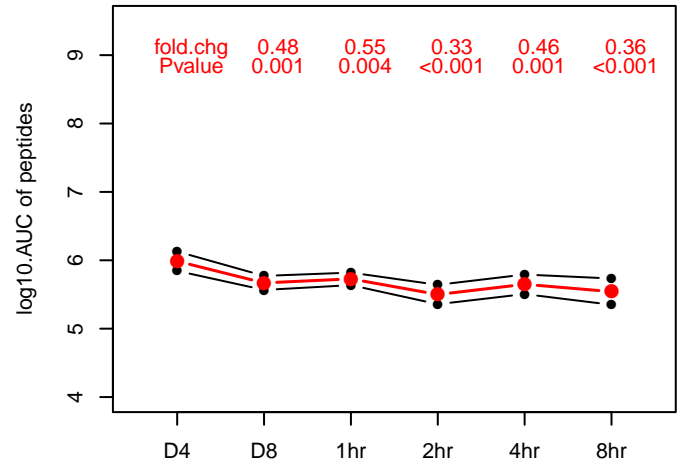

### BUB3\_HUMAN

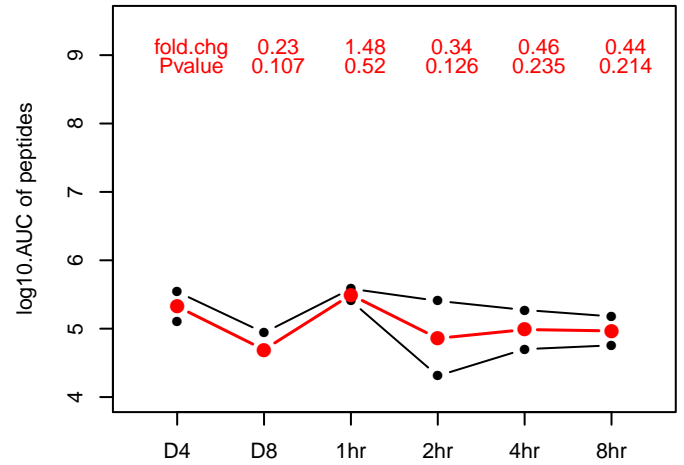

**BUD13\_HUMAN**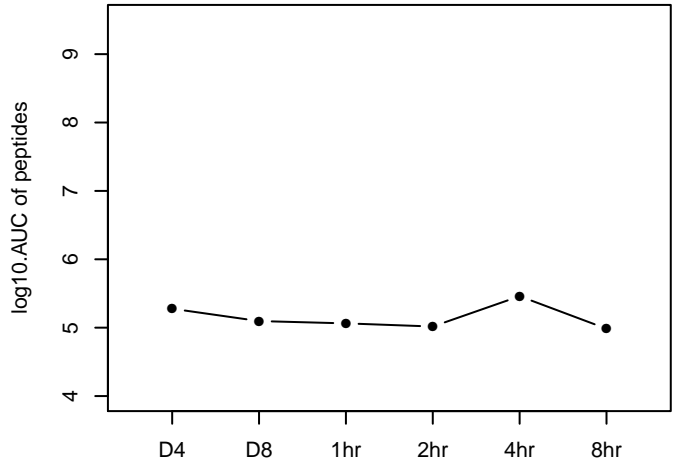**C19L1\_HUMAN**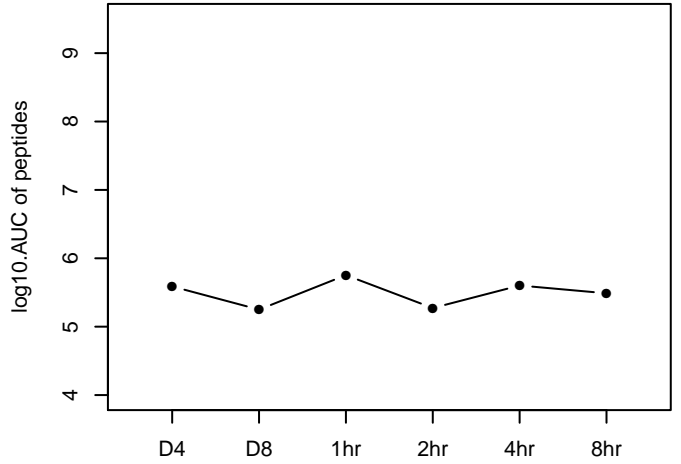**C8AP2\_HUMAN**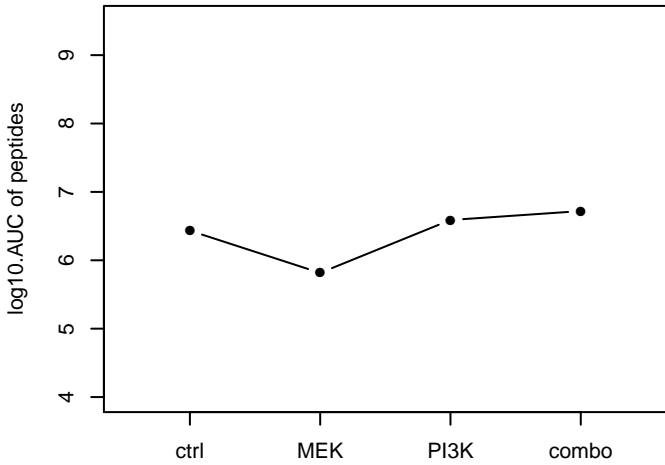**C8AP2\_HUMAN**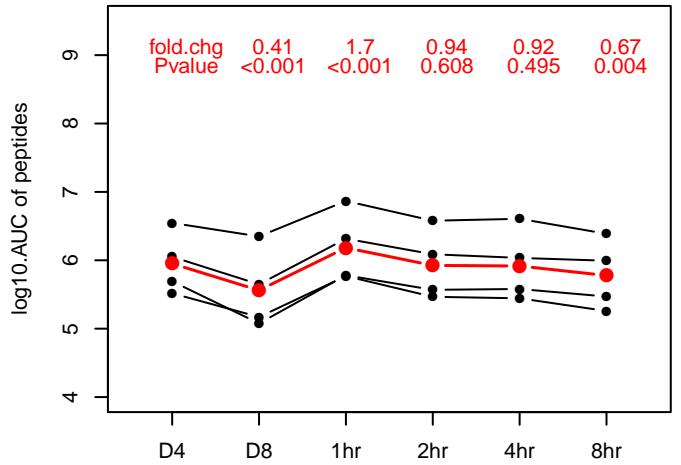



**CA021\_HUMAN**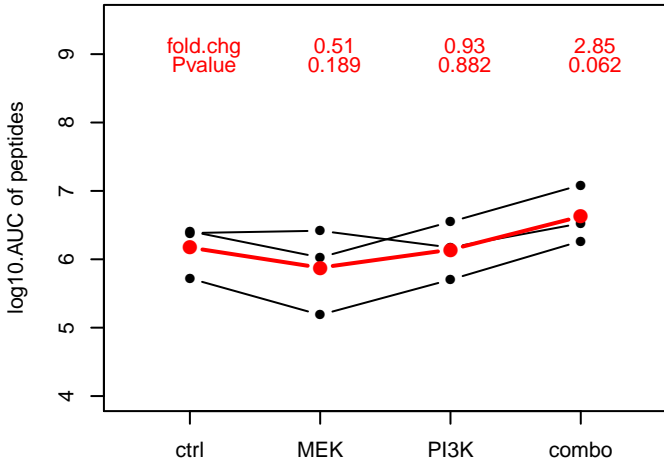**CA021\_HUMAN**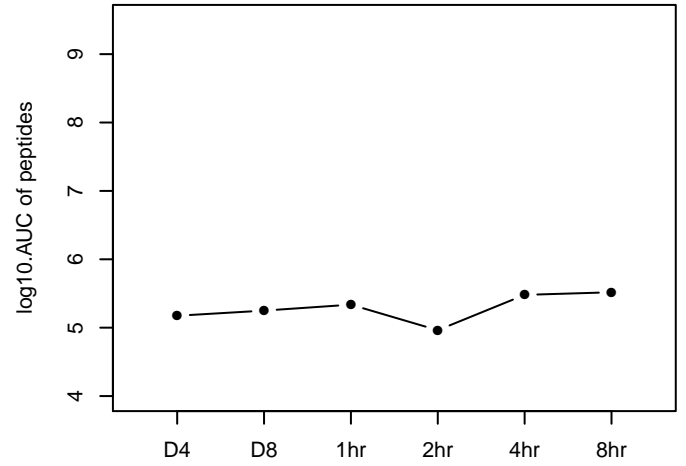**CA055\_HUMAN**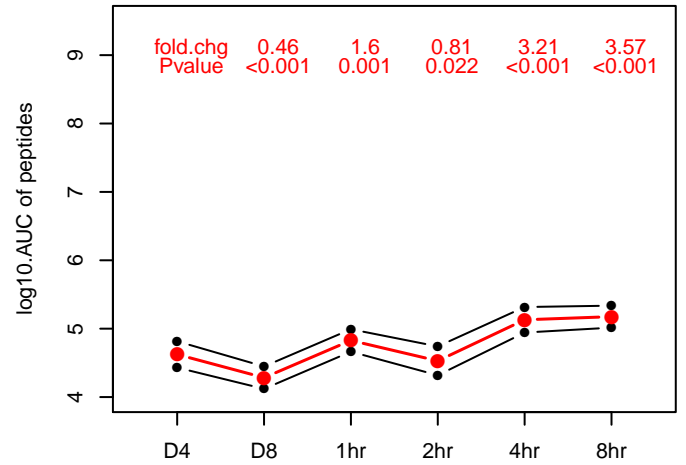**CA131\_HUMAN**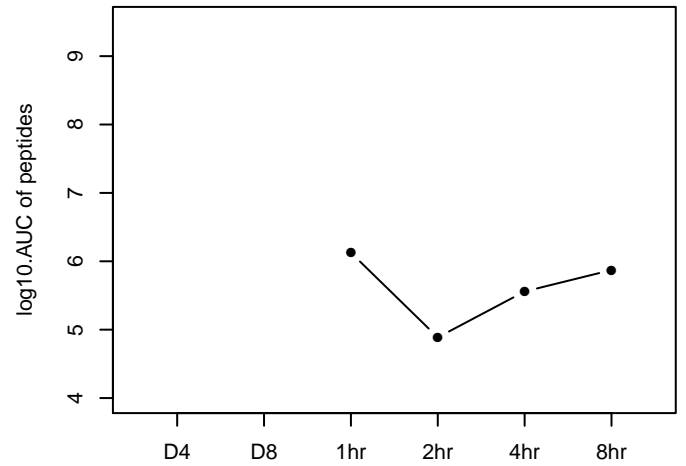

**CA198\_HUMAN**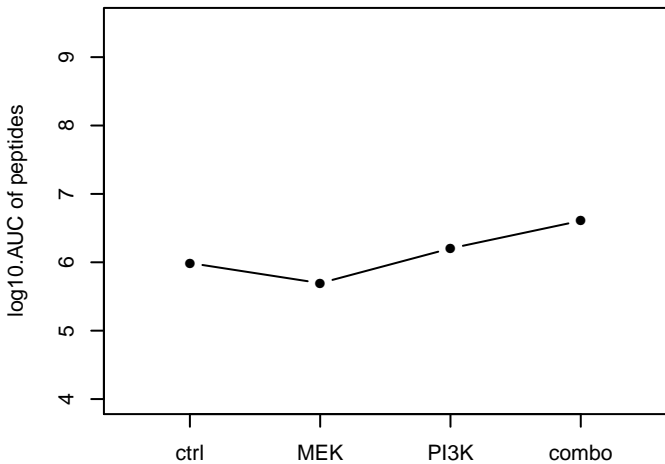**CA198\_HUMAN**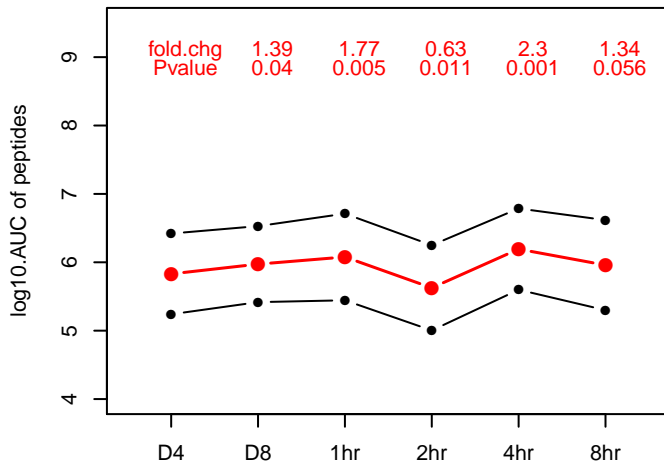**CAB45\_HUMAN**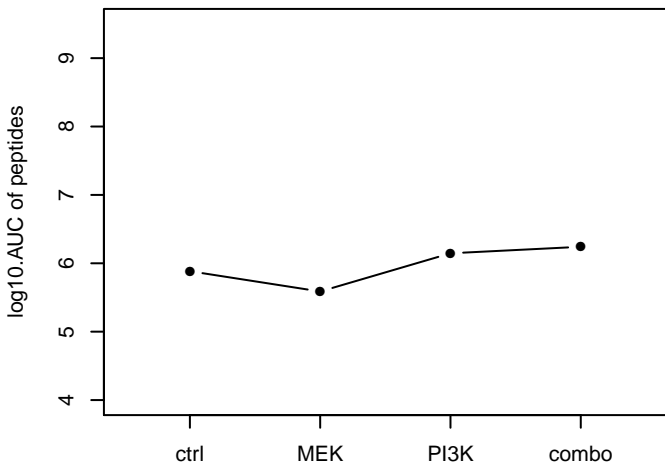**CAB45\_HUMAN**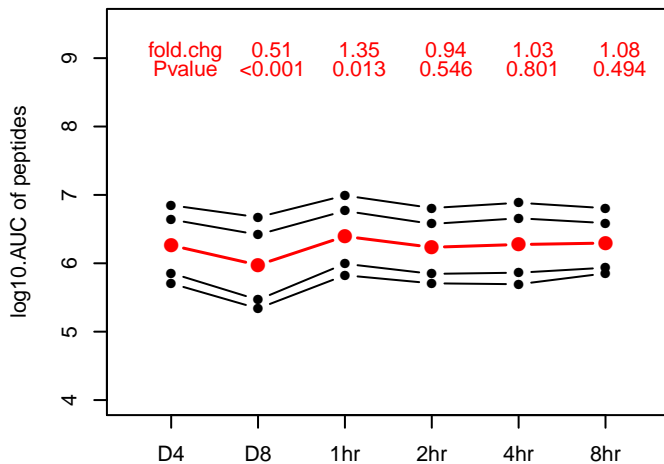**CADH2\_HUMAN**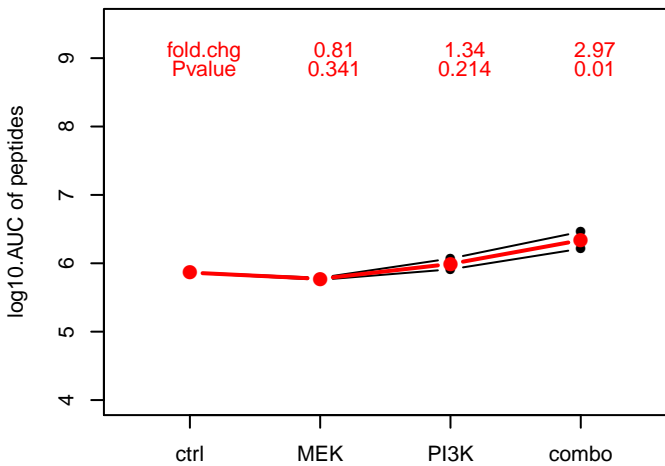**CADH2\_HUMAN**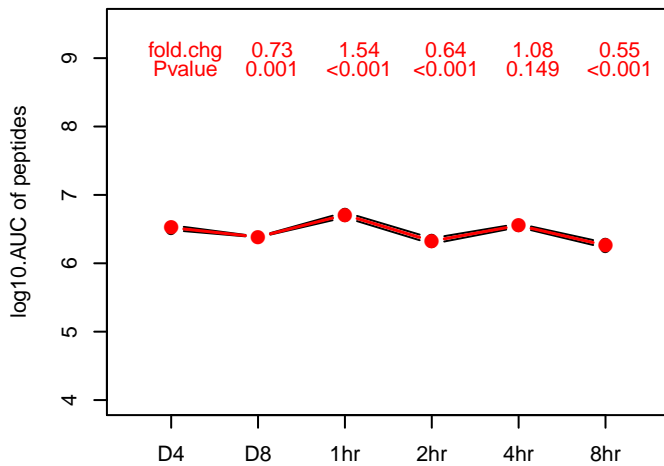

### CALD1\_HUMAN

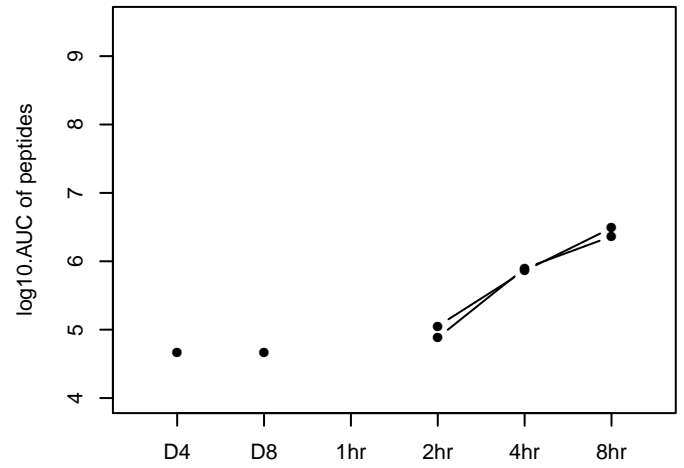

### CALU\_HUMAN

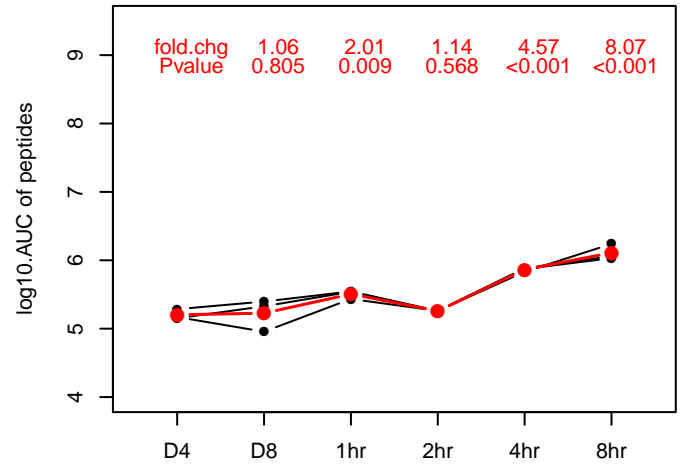

### CALX\_HUMAN

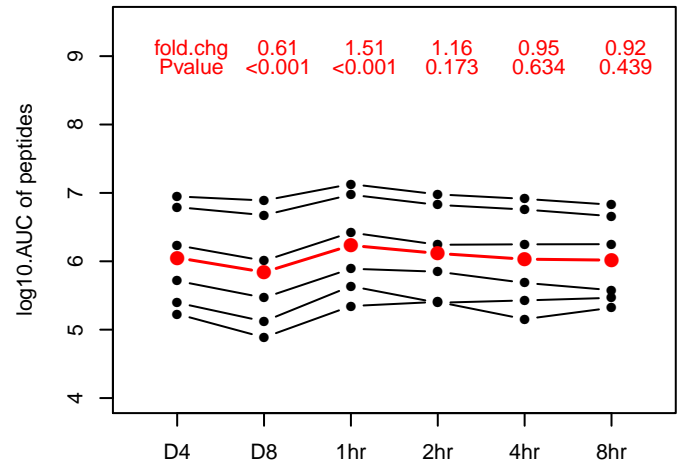

### CARF\_HUMAN

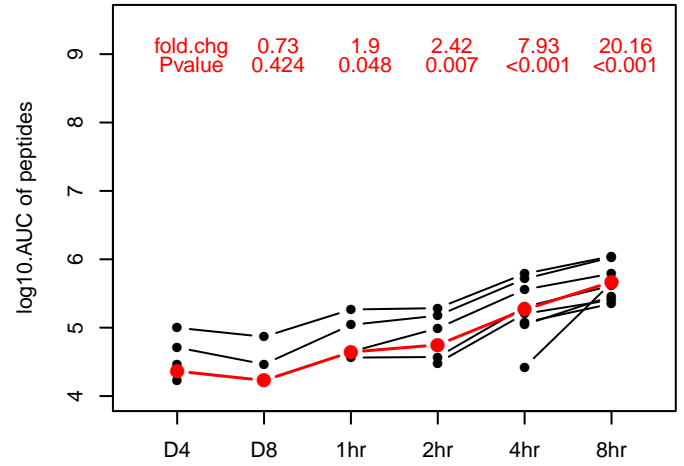

### CASC3\_HUMAN

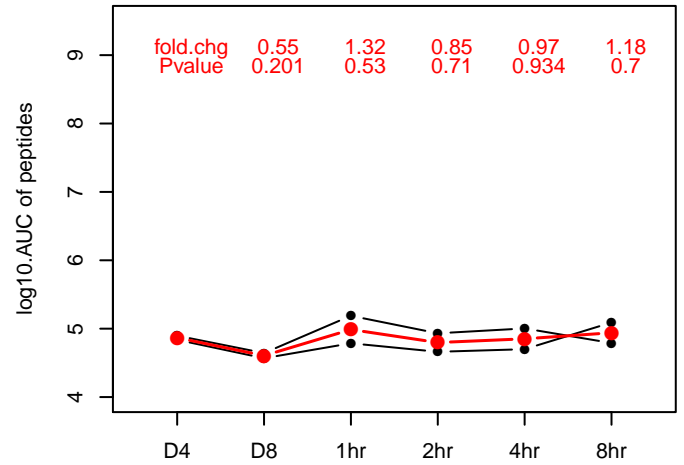

### CBLB\_HUMAN

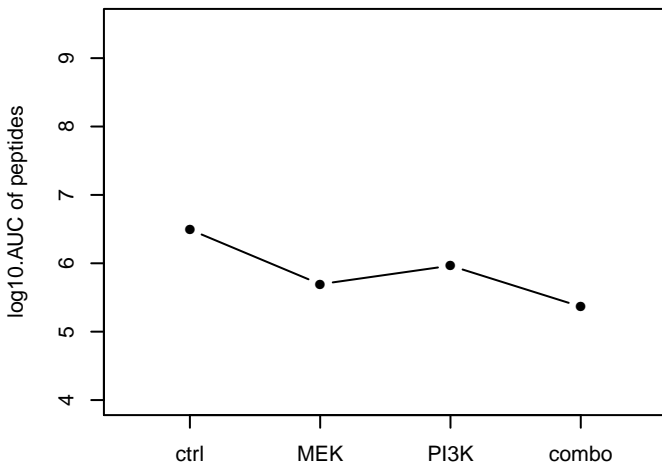

### CBLB\_HUMAN

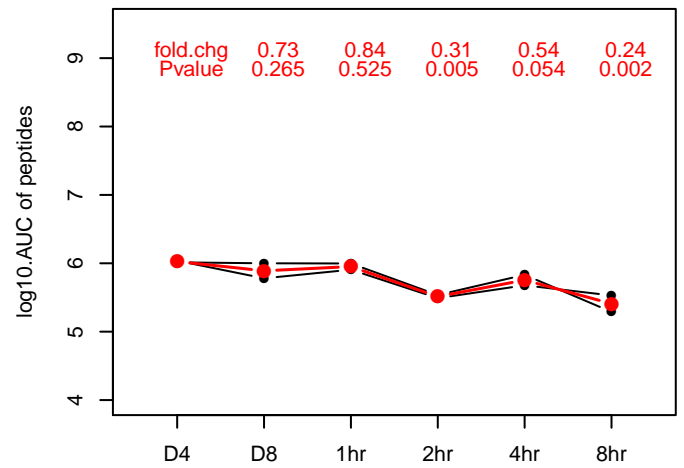

**CC037\_HUMAN**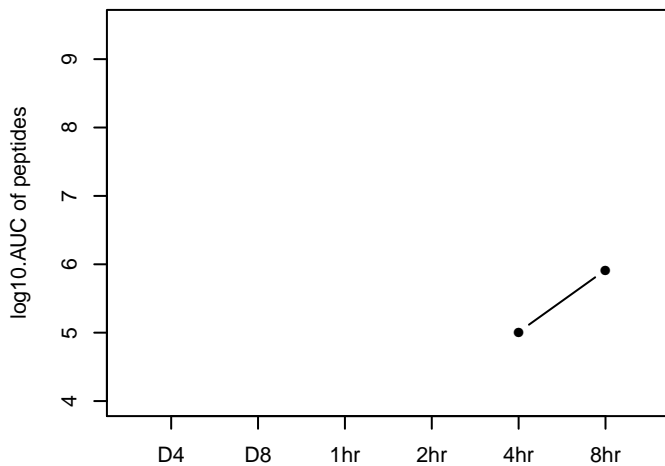**CCAR1\_HUMAN**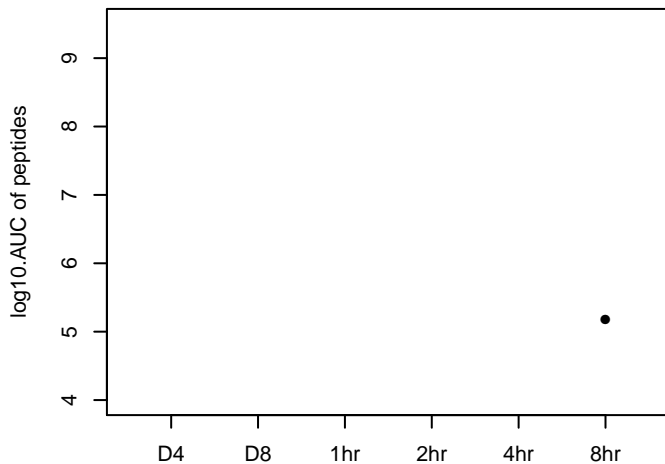**CCD86\_HUMAN**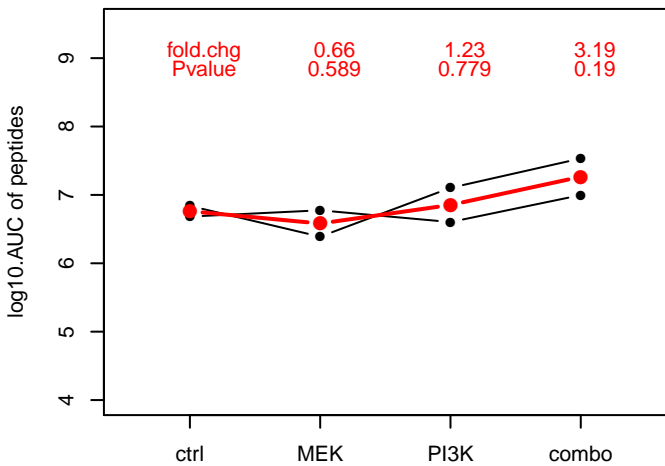**CCD86\_HUMAN**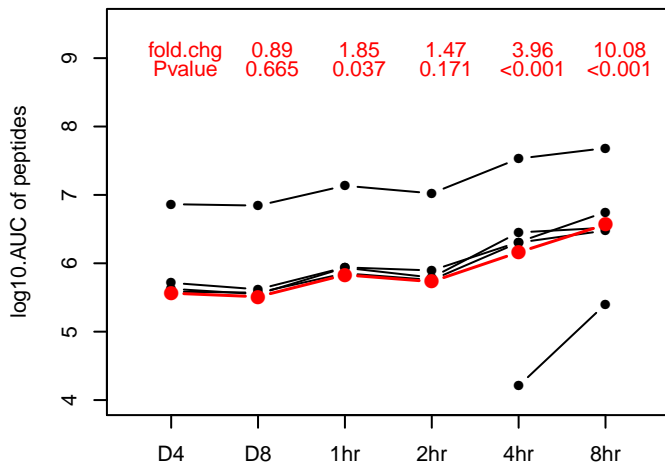

**CCNC\_HUMAN**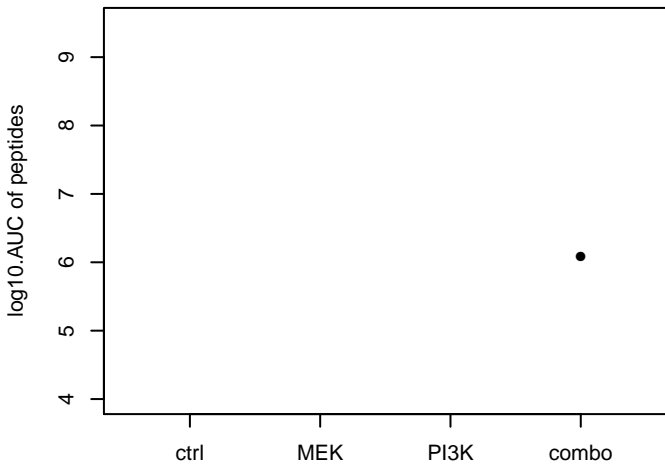**CCNC\_HUMAN**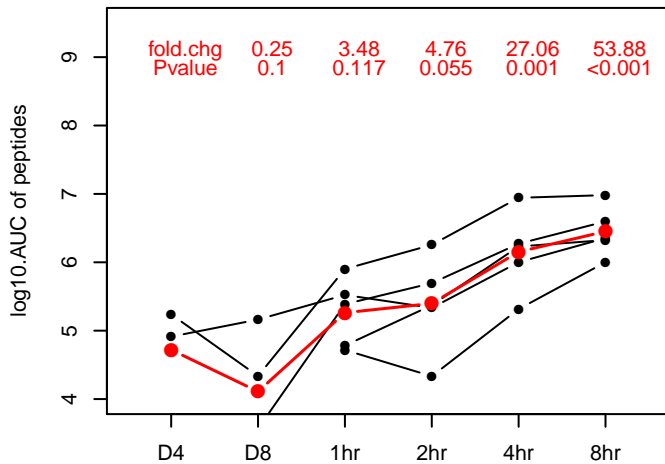**CCNT2\_HUMAN**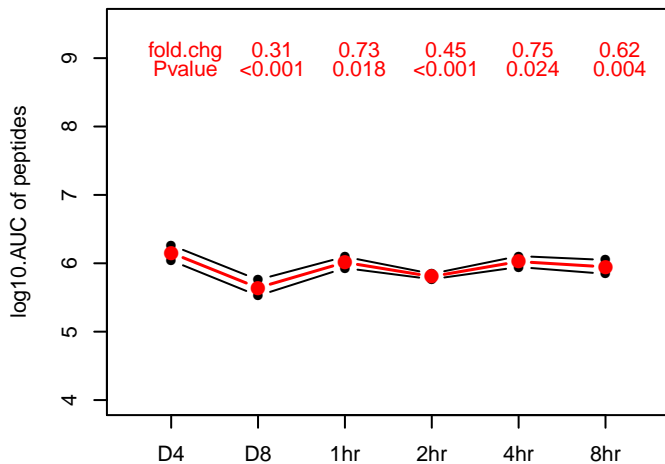**CCNY\_HUMAN**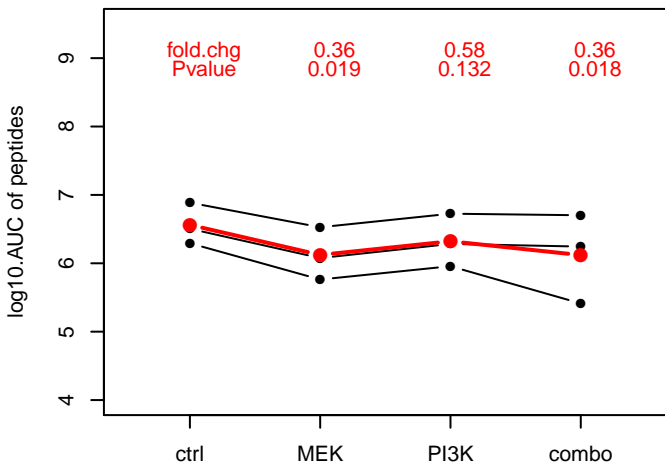**CCNY\_HUMAN**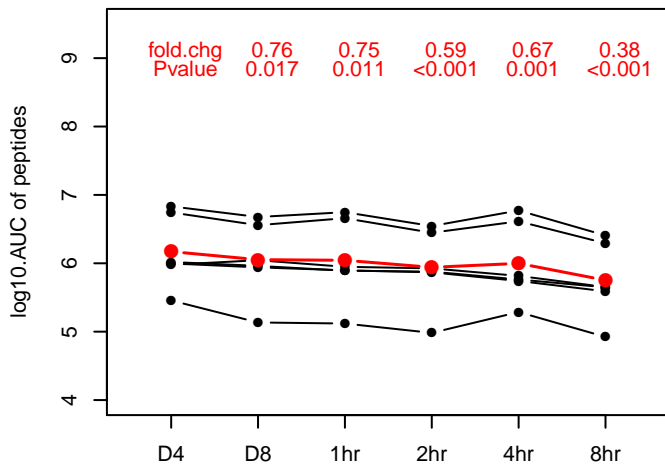

**CD11A\_HUMAN**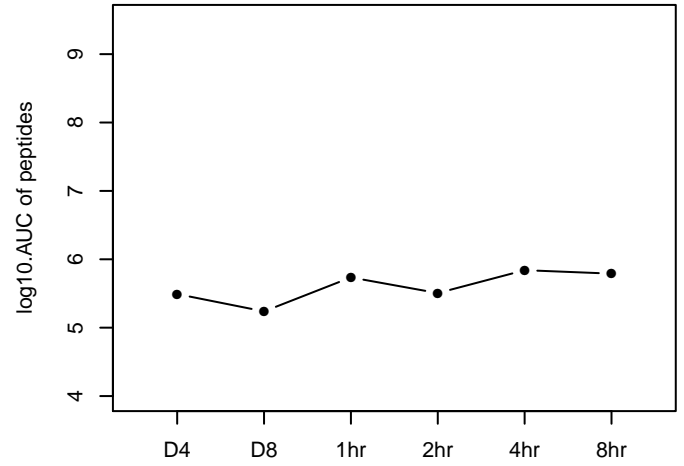**CD44\_HUMAN**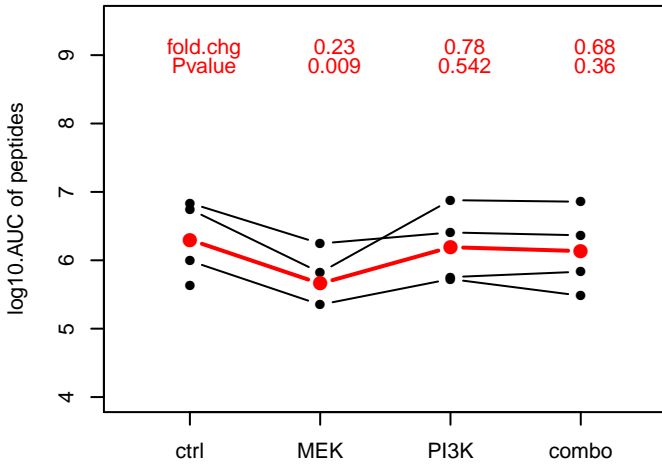**CD44\_HUMAN**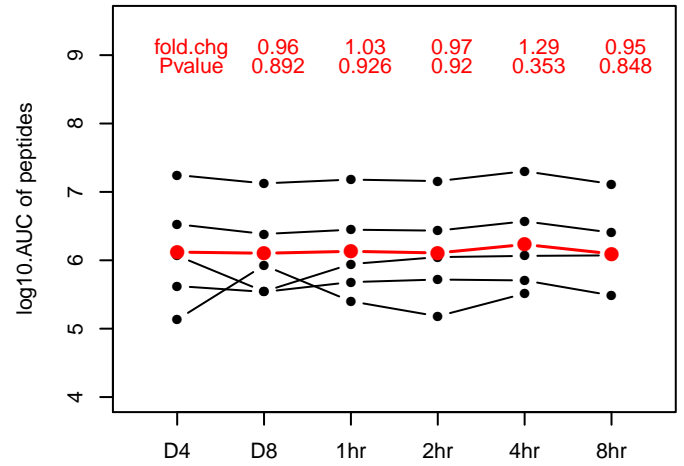**CDC26\_HUMAN**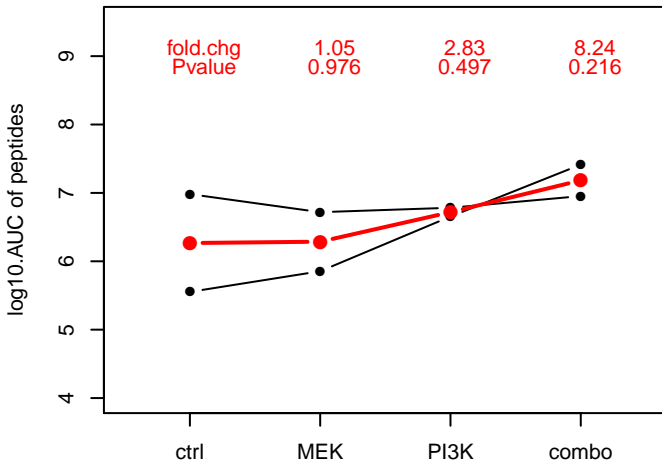**CDC26\_HUMAN**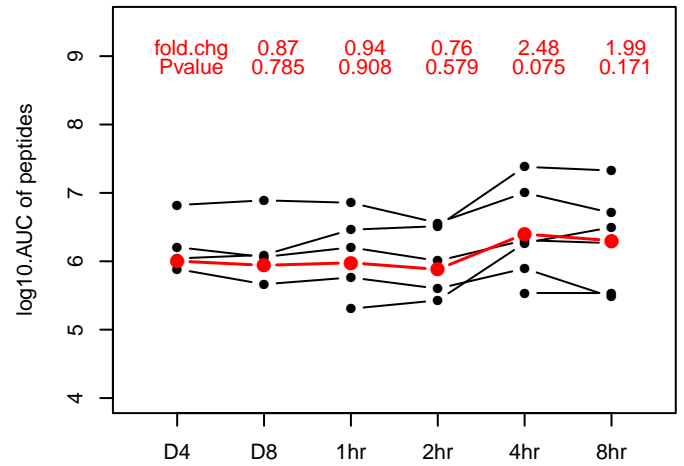

### CDC42\_HUMAN

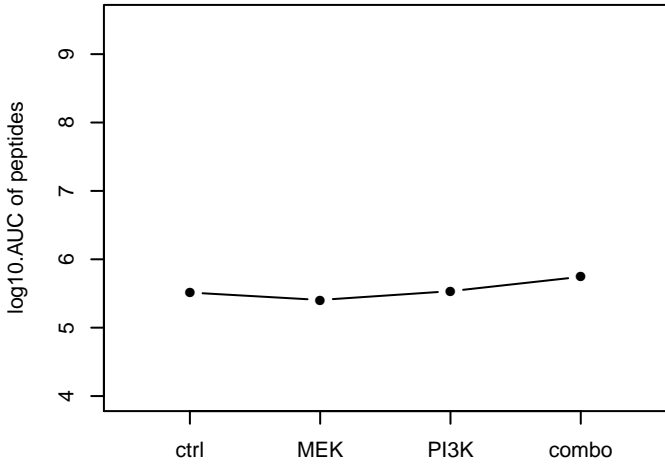

### CDC42\_HUMAN

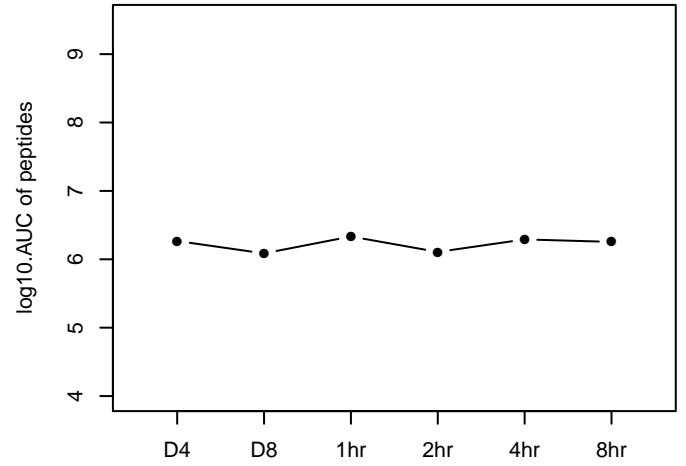

### CDK9\_HUMAN

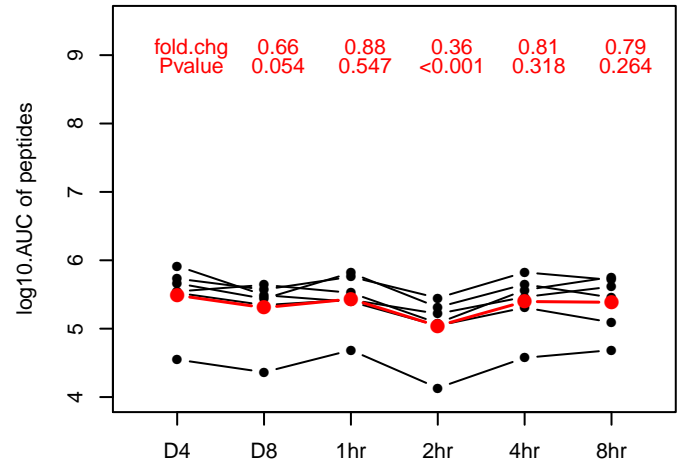

### CDKAL\_HUMAN

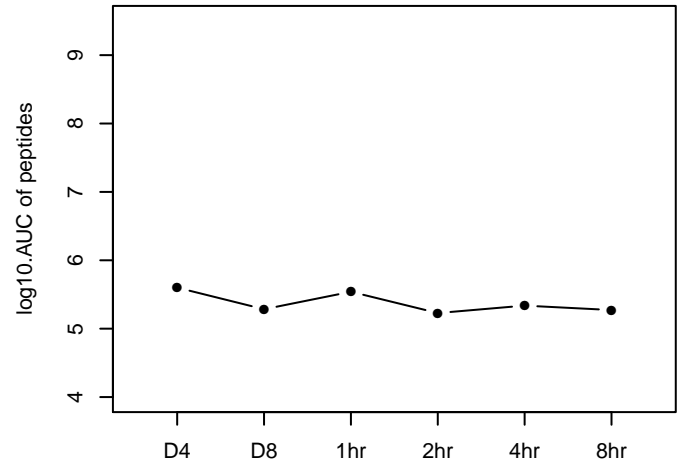



**CDYL1\_HUMAN**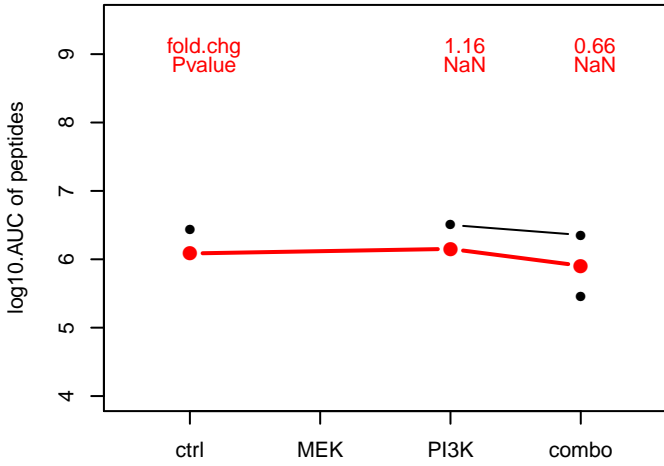**CDYL1\_HUMAN**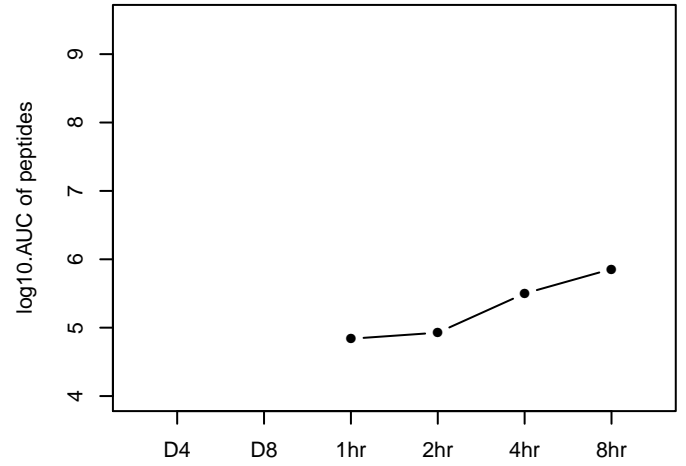**CE022\_HUMAN**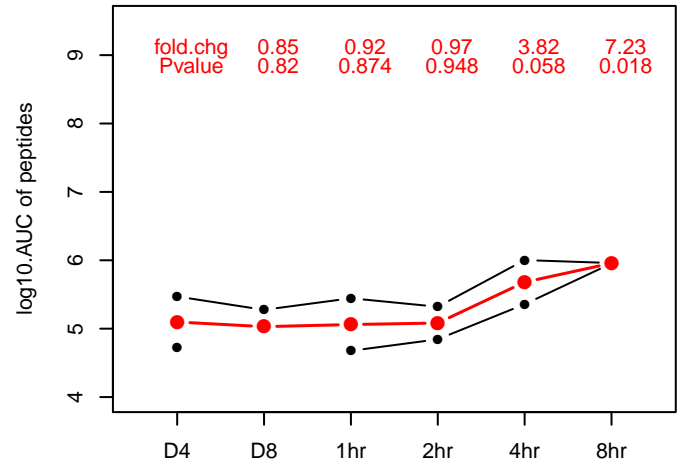**CE024\_HUMAN**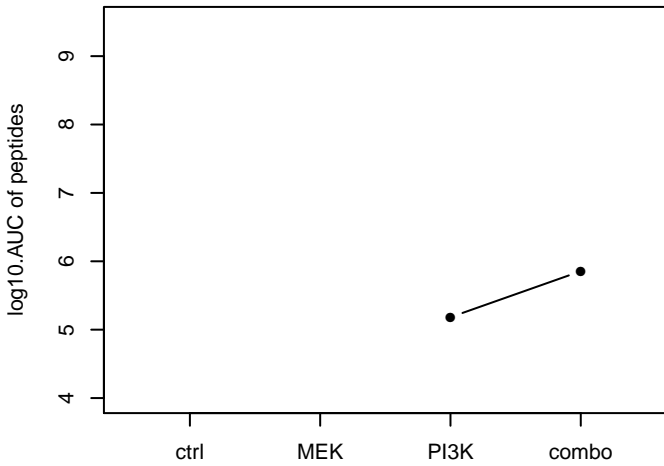**CE024\_HUMAN**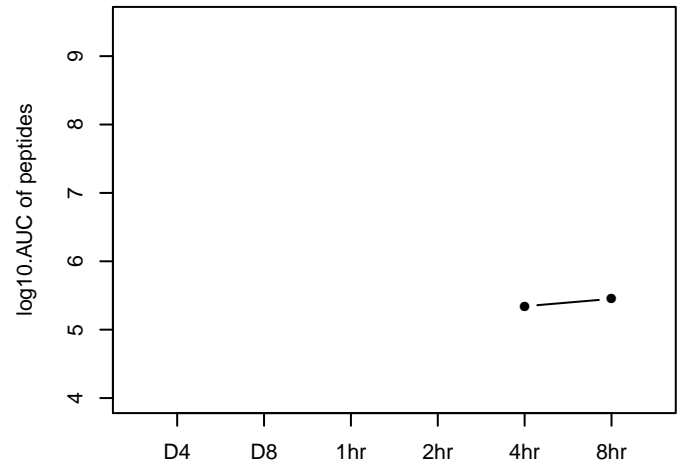

**CE164\_HUMAN**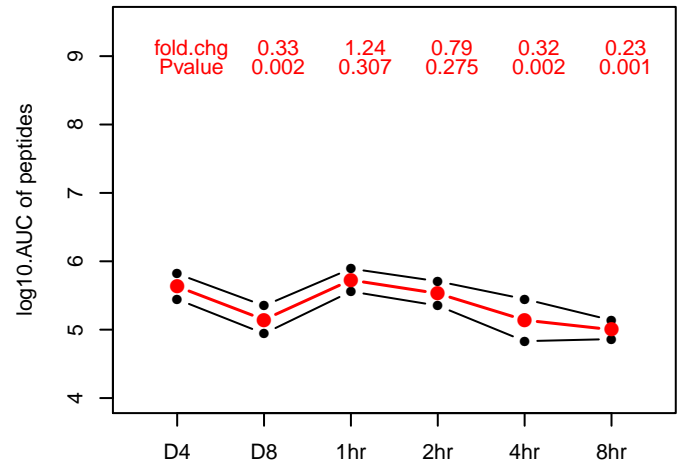**CE170\_HUMAN**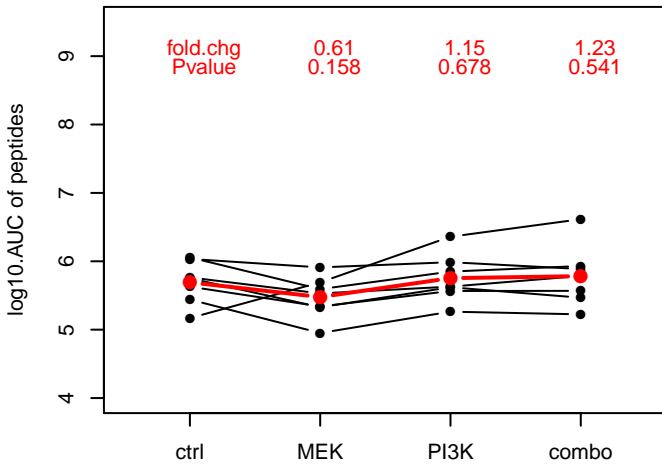**CE170\_HUMAN**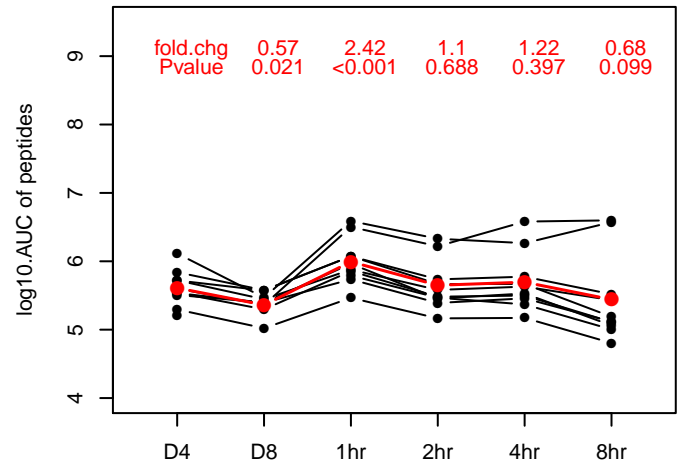**CENPL\_HUMAN**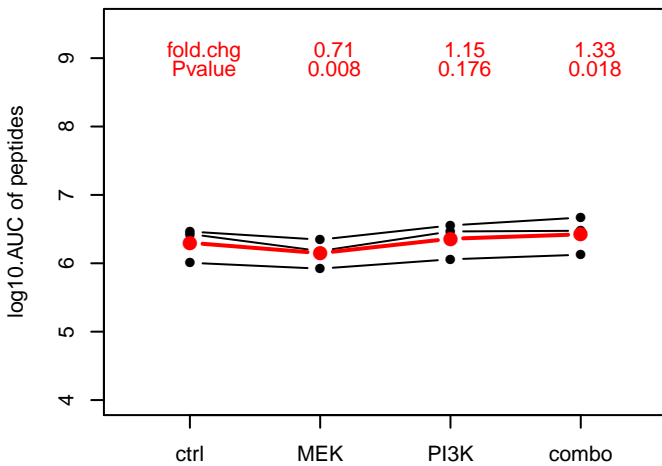**CENPL\_HUMAN**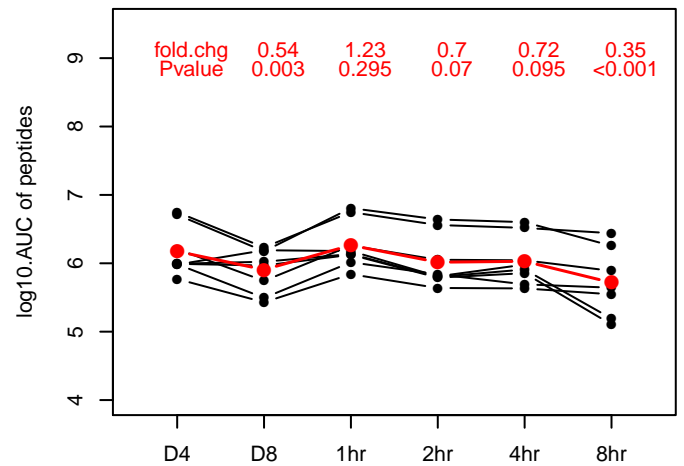

### CENPQ\_HUMAN

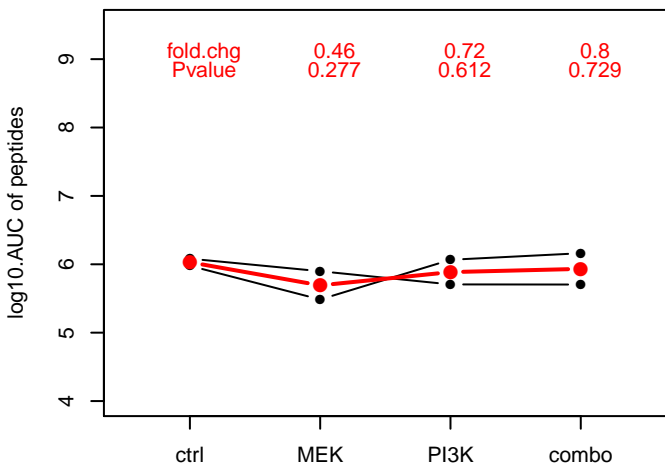

### CENPQ\_HUMAN

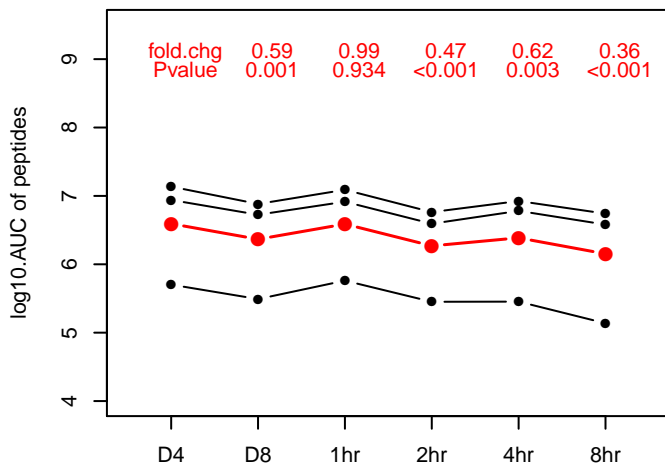

### CEP55\_HUMAN

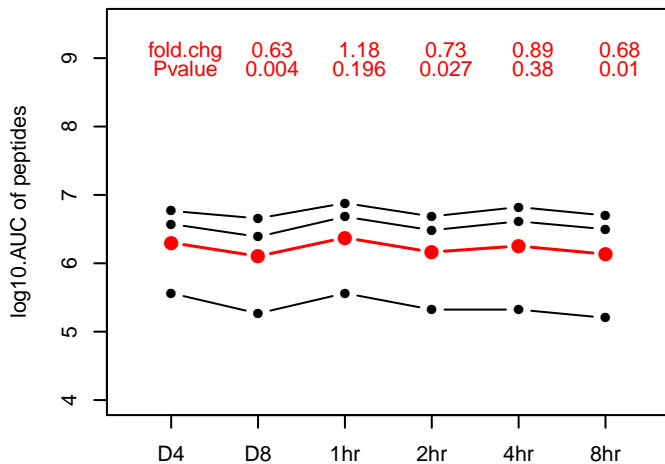

### CEP97\_HUMAN

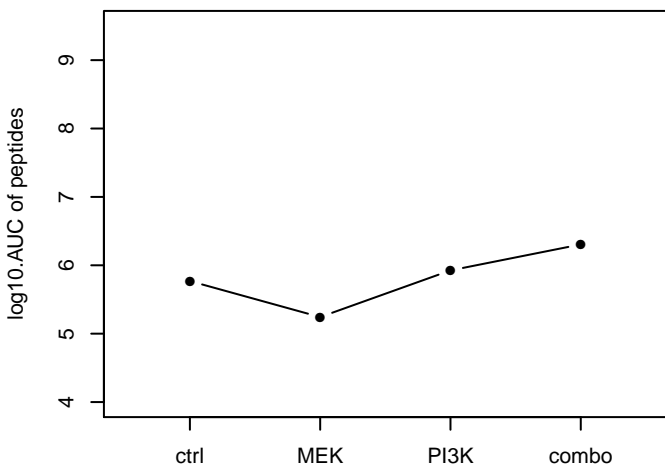

### CGBP1\_HUMAN

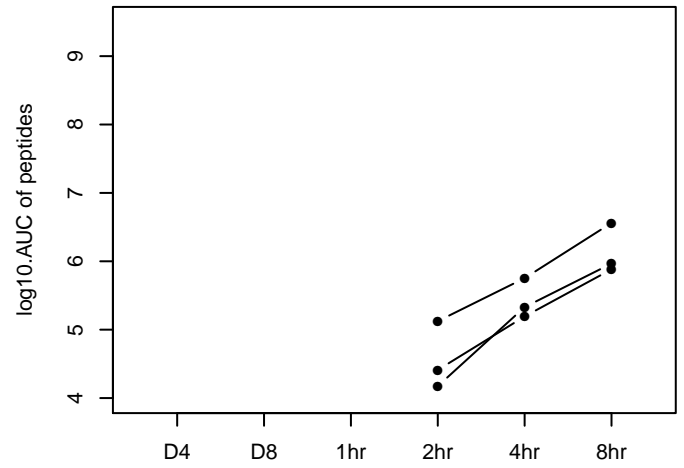

### CH055\_HUMAN

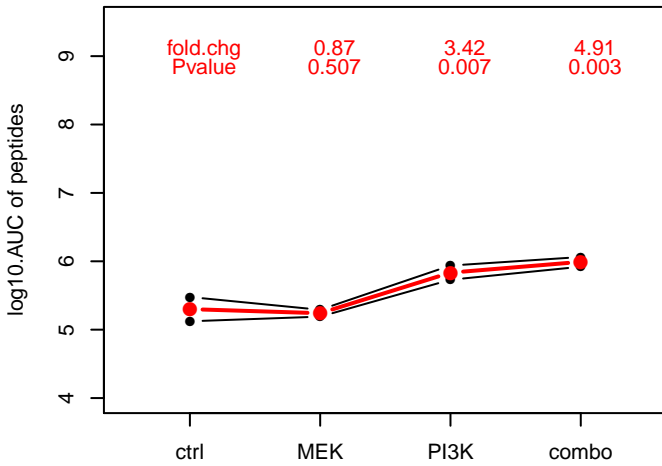

### CH055\_HUMAN

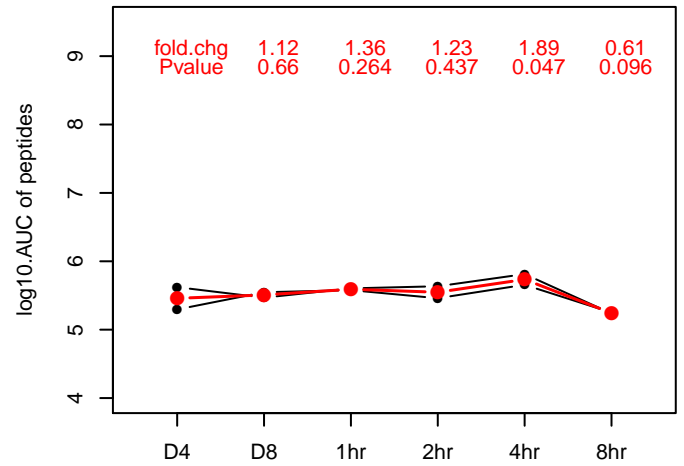

### CHD4\_HUMAN

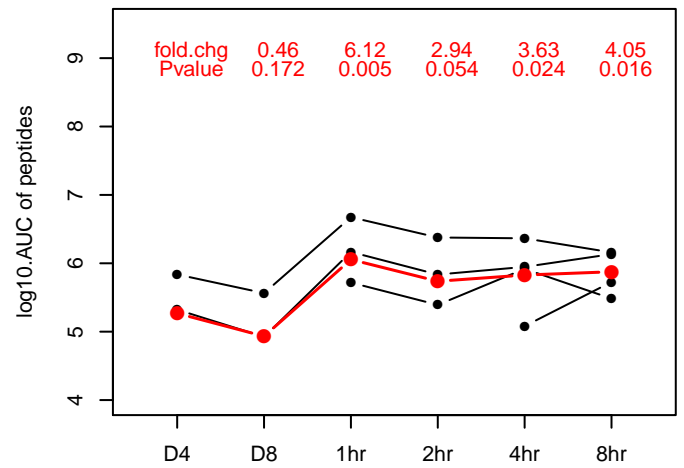

**CHMP6\_HUMAN**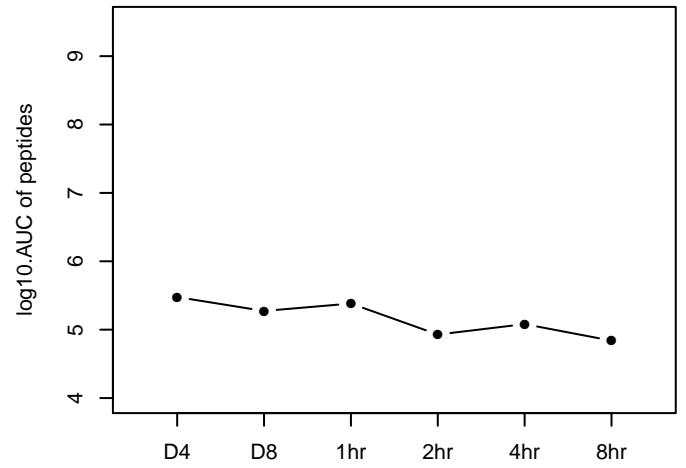**CING\_HUMAN**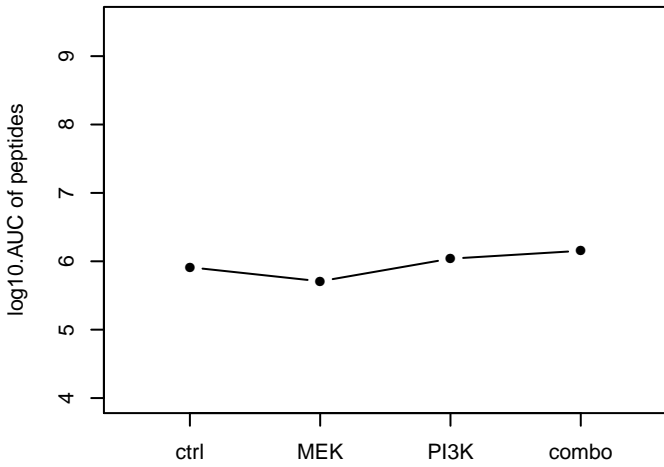**CING\_HUMAN**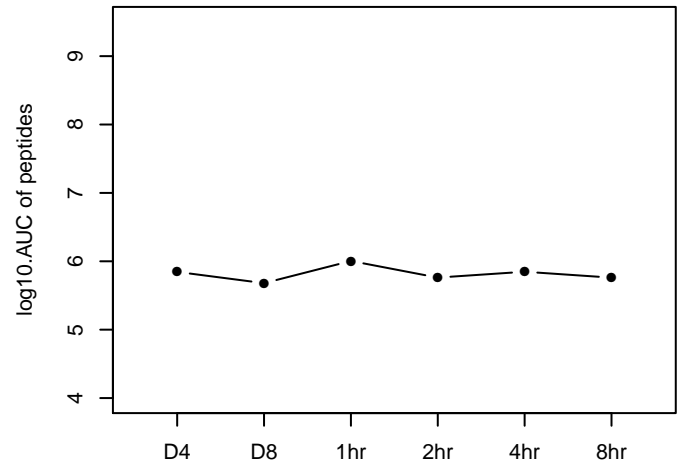**CIZ1\_HUMAN**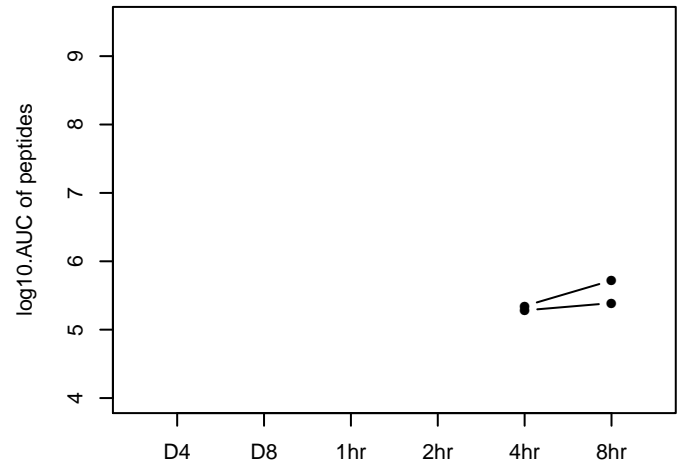

### CK048\_HUMAN

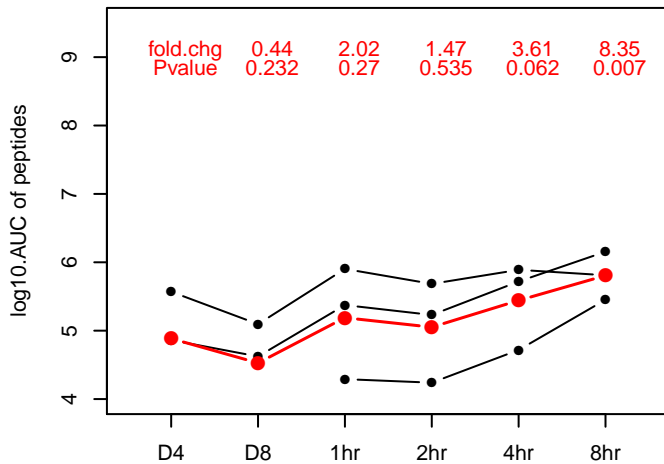

### CKAP5\_HUMAN

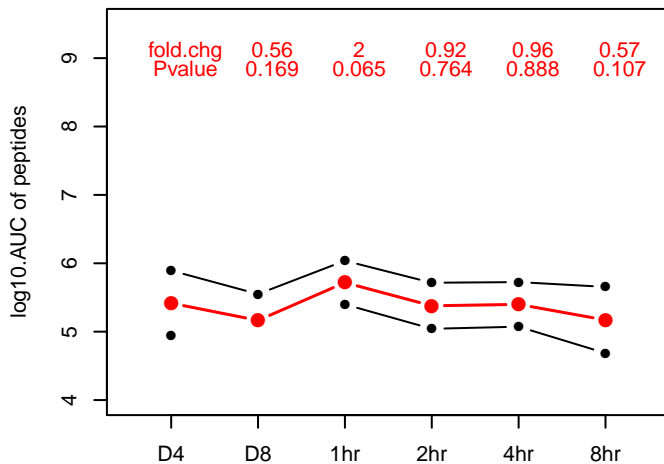

### CKS1\_HUMAN

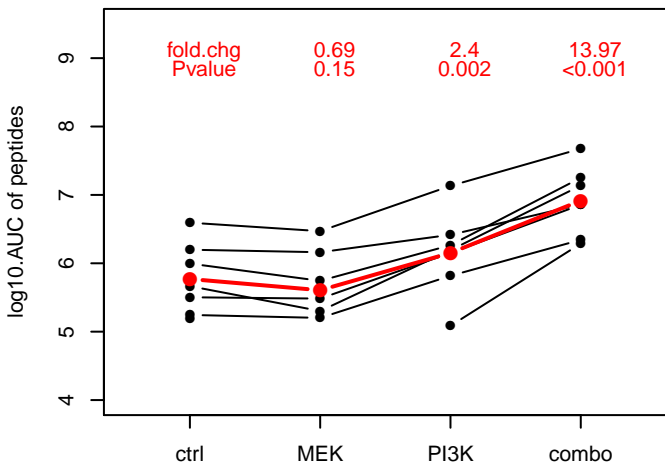

### CKS1\_HUMAN

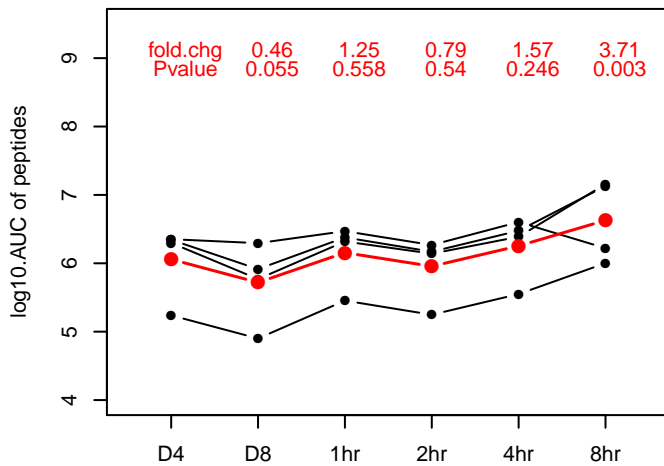

**CL041\_HUMAN**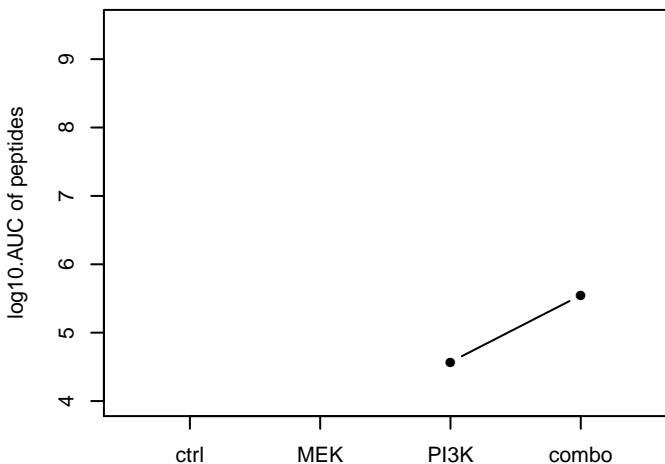**CL041\_HUMAN**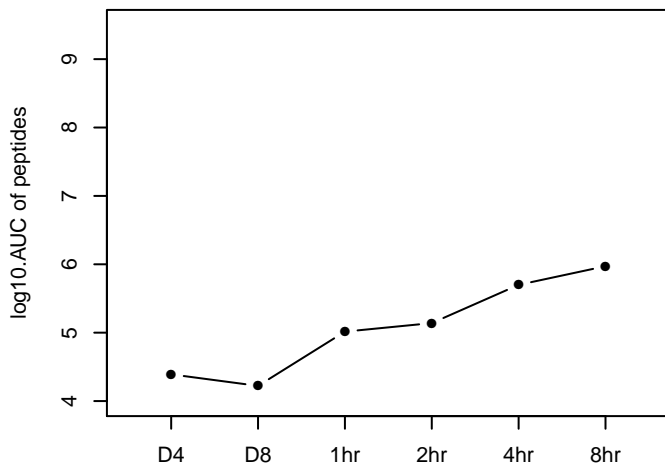**CL043\_HUMAN**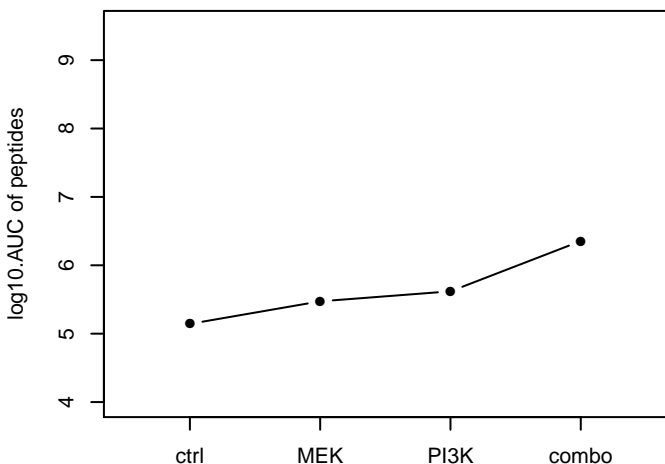**CL043\_HUMAN**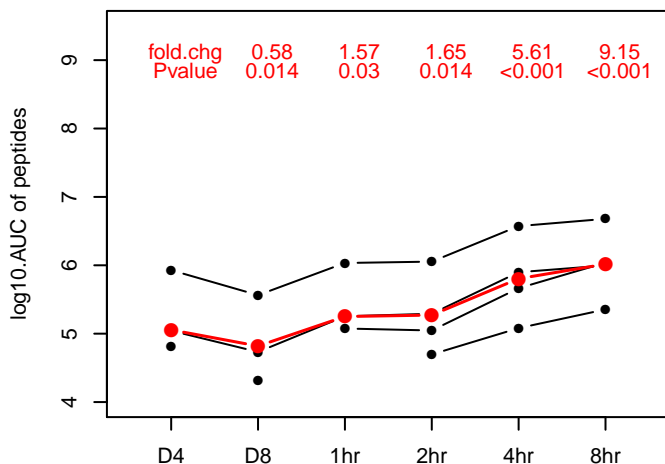**CLAP1\_HUMAN**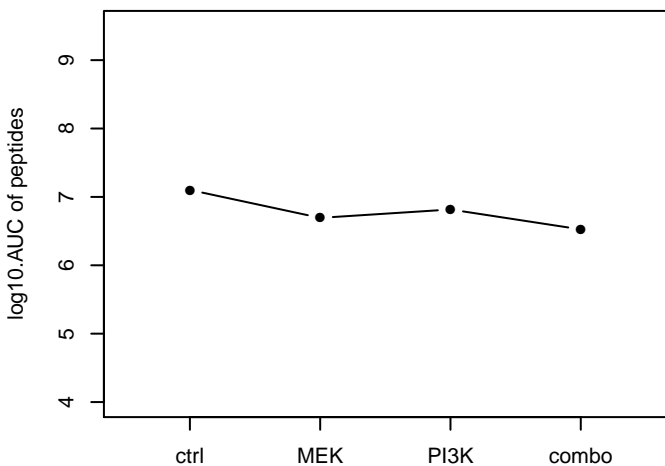**CLAP1\_HUMAN**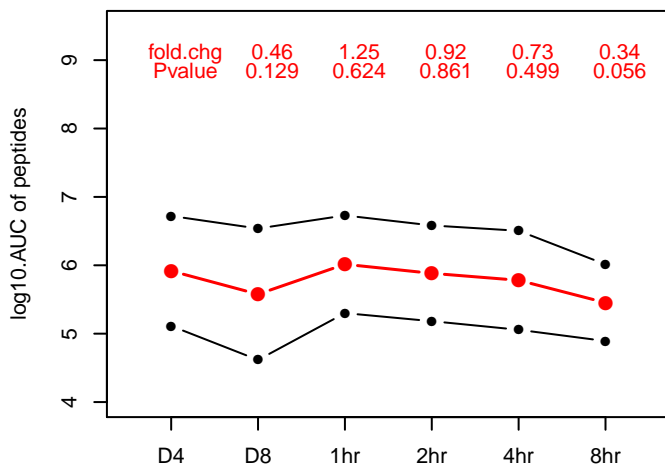

**CLAP2\_HUMAN**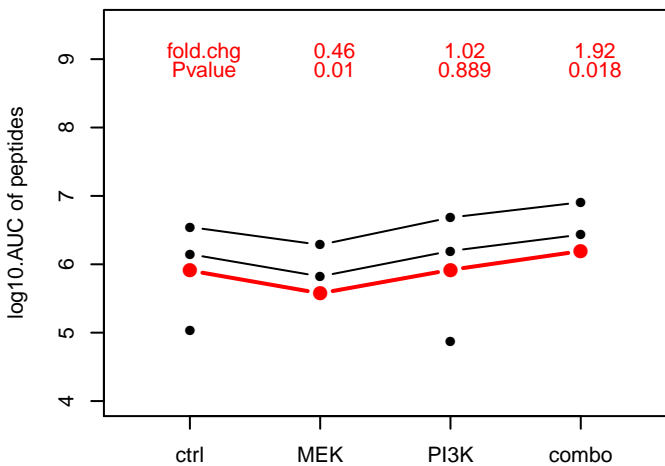**CLAP2\_HUMAN**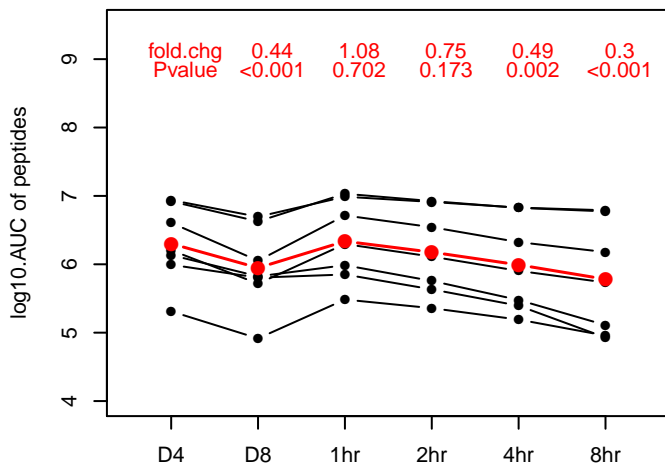**CLIC1\_HUMAN**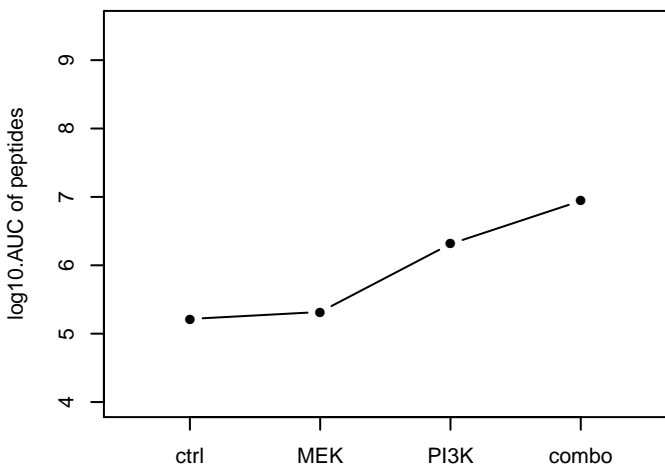**CLIC1\_HUMAN**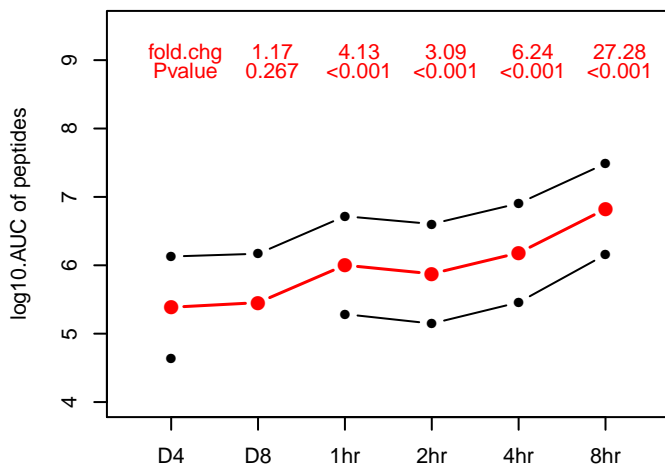**CLIP1\_HUMAN**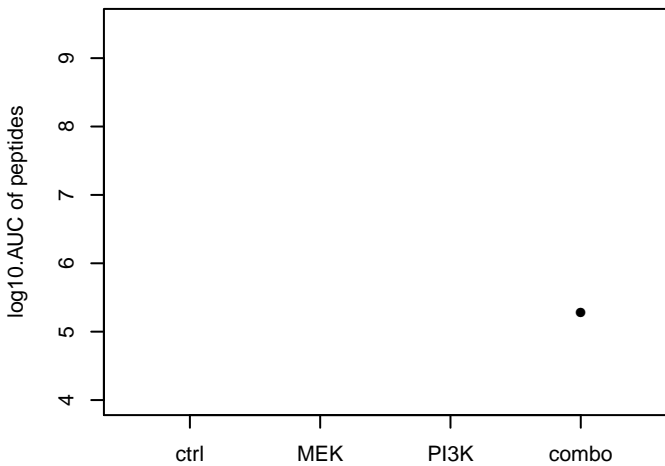**CLIP1\_HUMAN**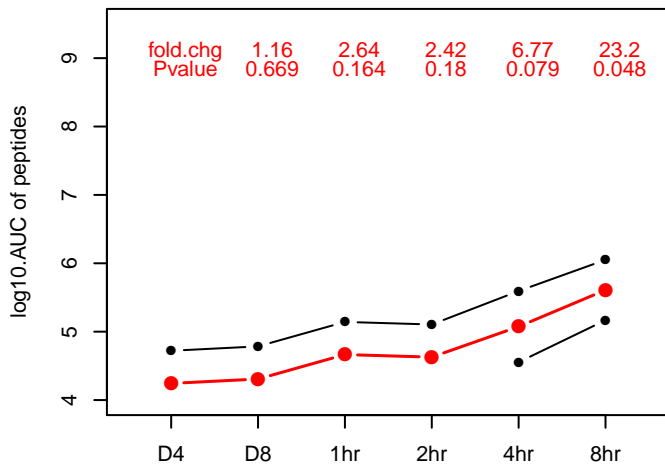



**CLSPN\_HUMAN**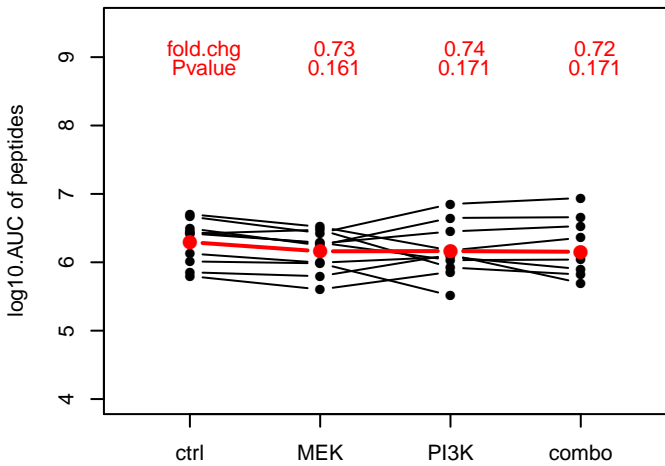**CLSPN\_HUMAN**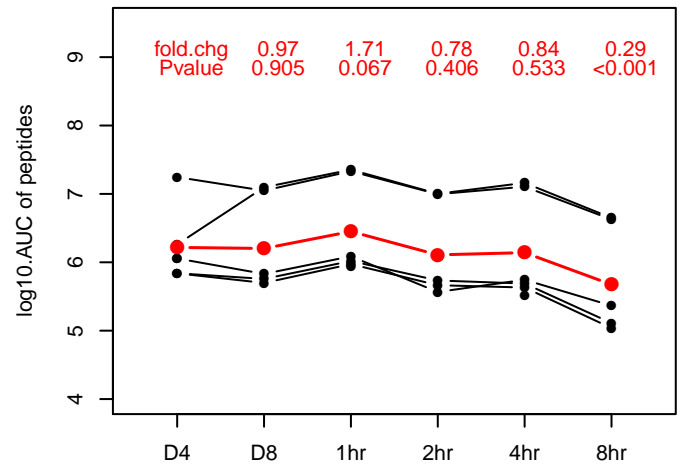**CN043\_HUMAN**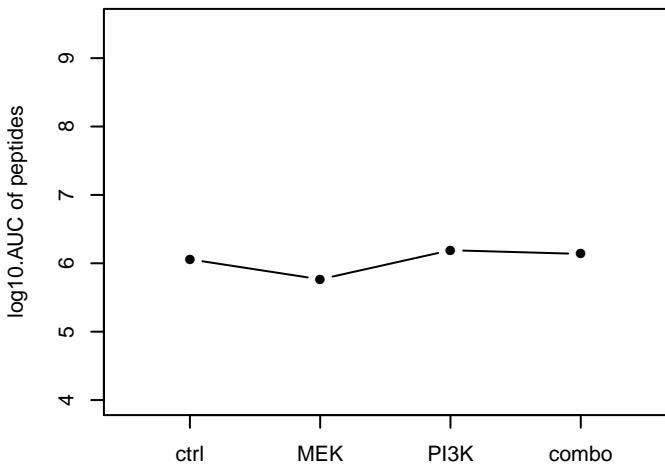**CN043\_HUMAN**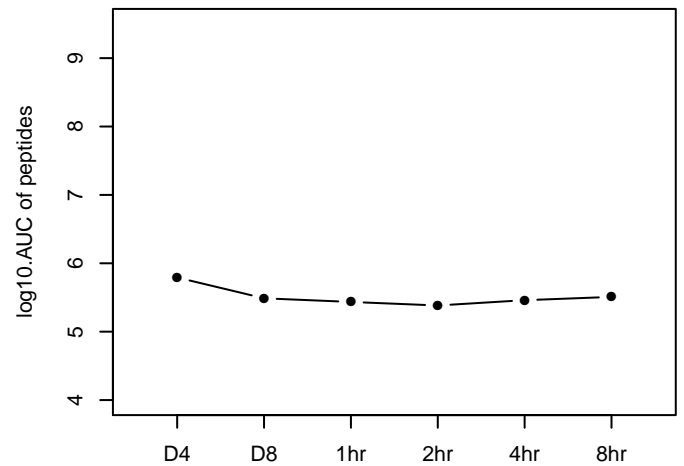**CND1\_HUMAN**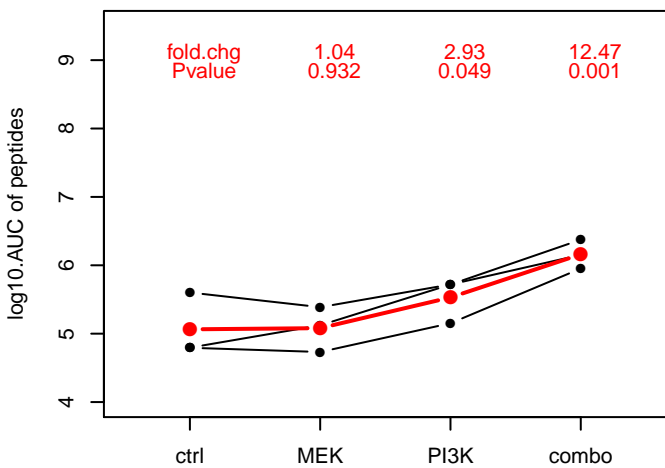**CND1\_HUMAN**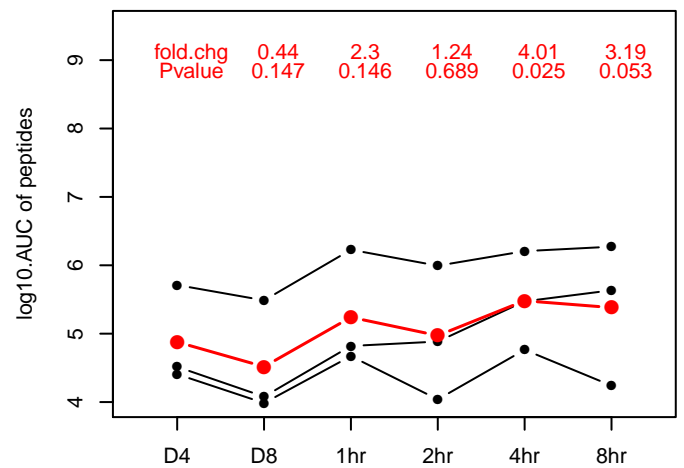

**CND3\_HUMAN**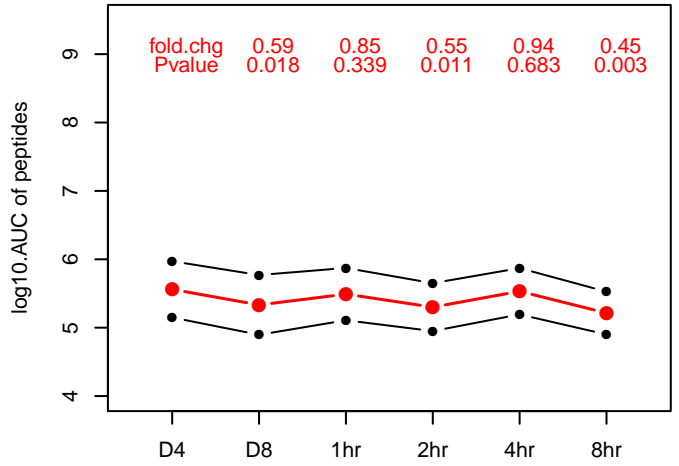**CNDH2\_HUMAN**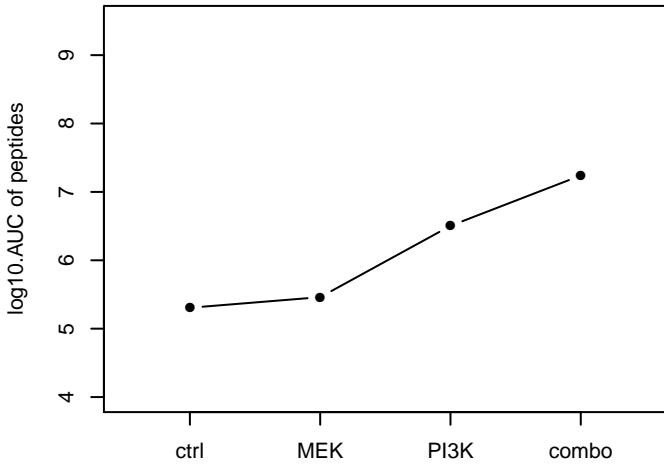**CNDH2\_HUMAN**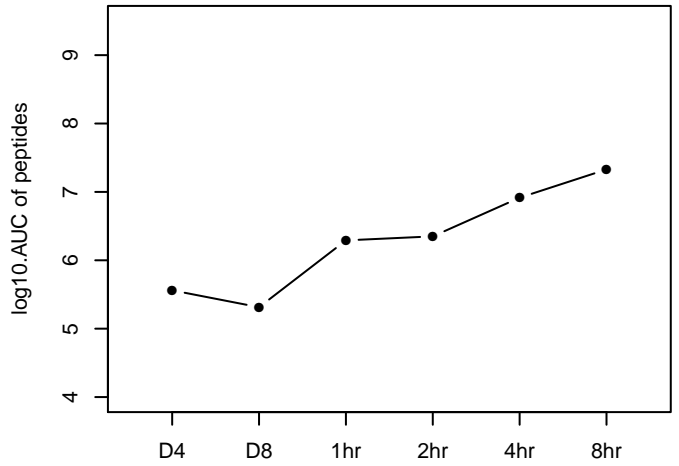**CNNM3\_HUMAN**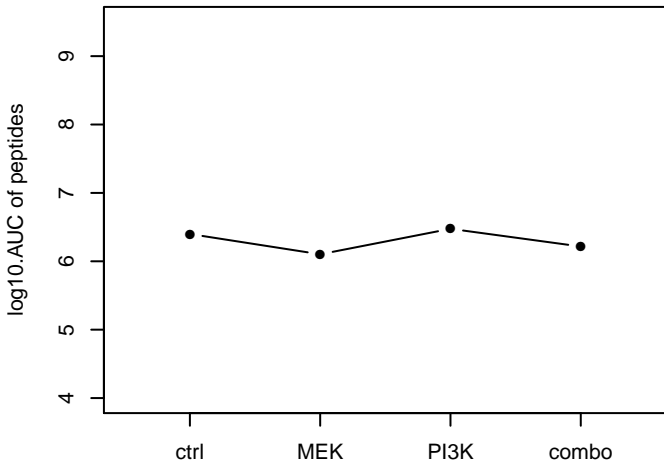**CNNM3\_HUMAN**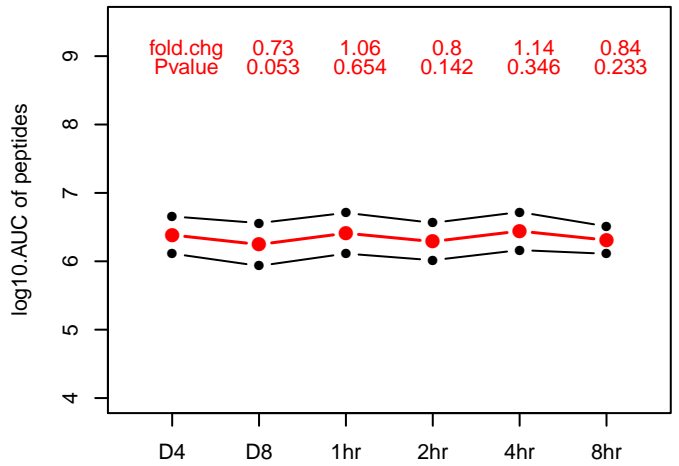

**CNOT2\_HUMAN**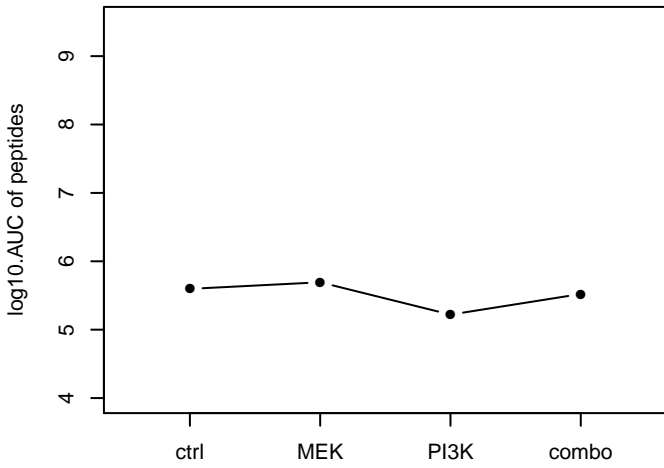**CNOT2\_HUMAN**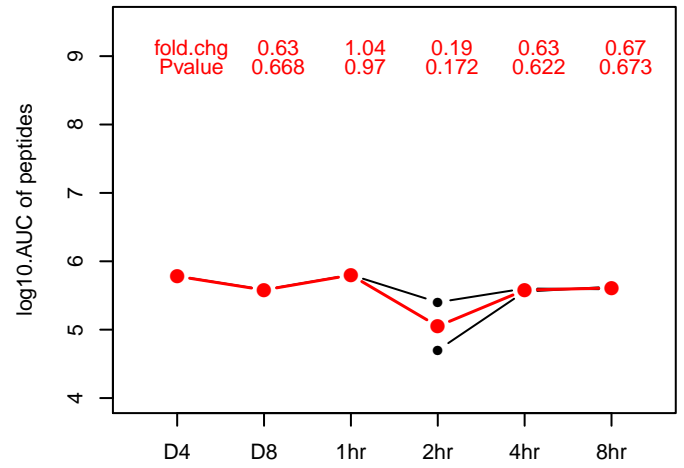**CO3\_HUMAN**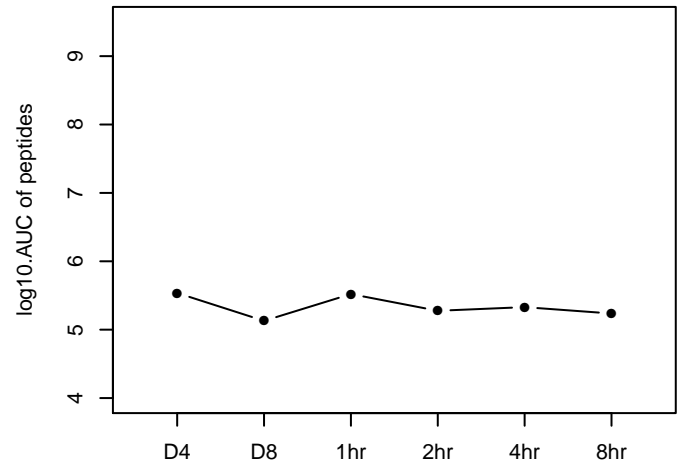**COG1\_HUMAN**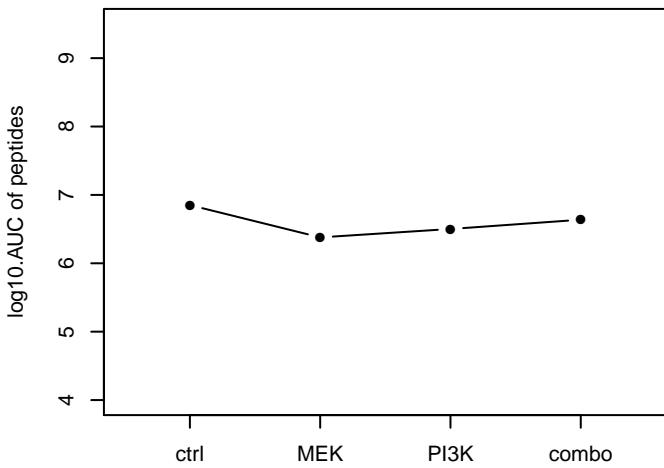**COG1\_HUMAN**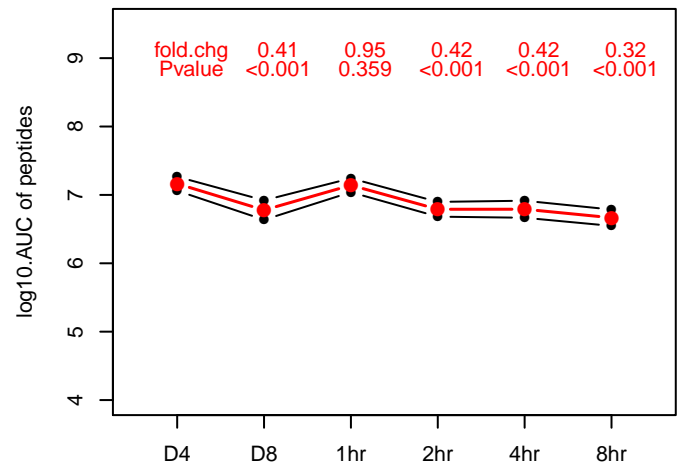

### COPB\_HUMAN

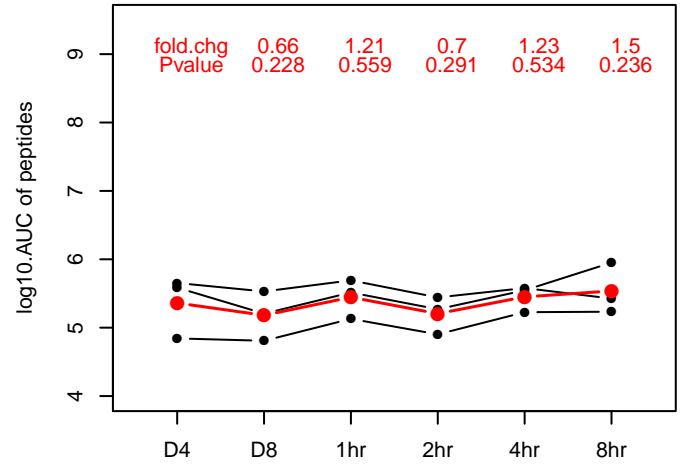

### CP110\_HUMAN

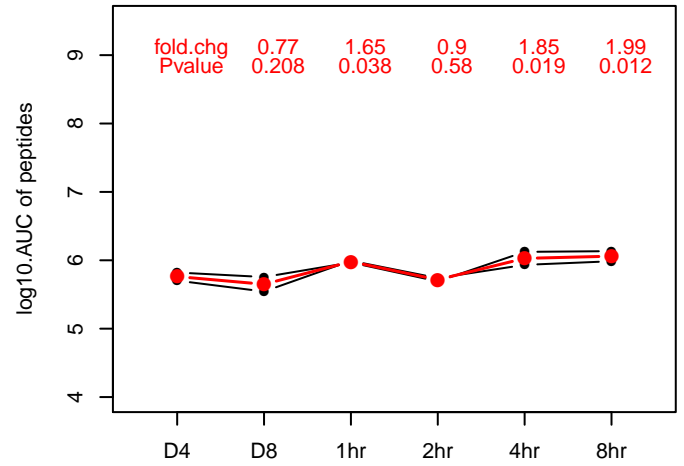

### CPSF5\_HUMAN

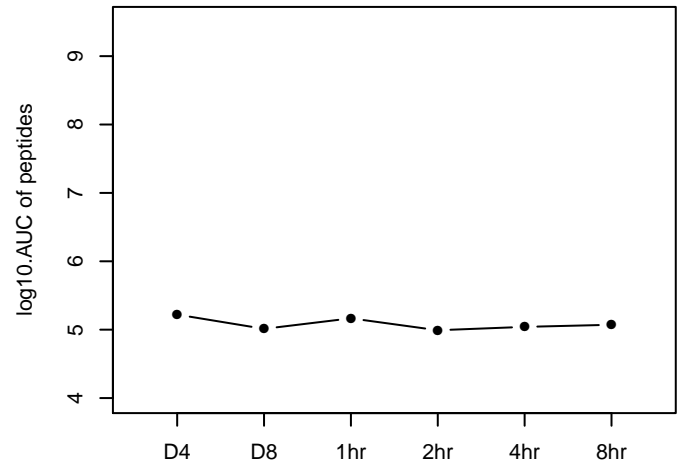

**CPSF7\_HUMAN**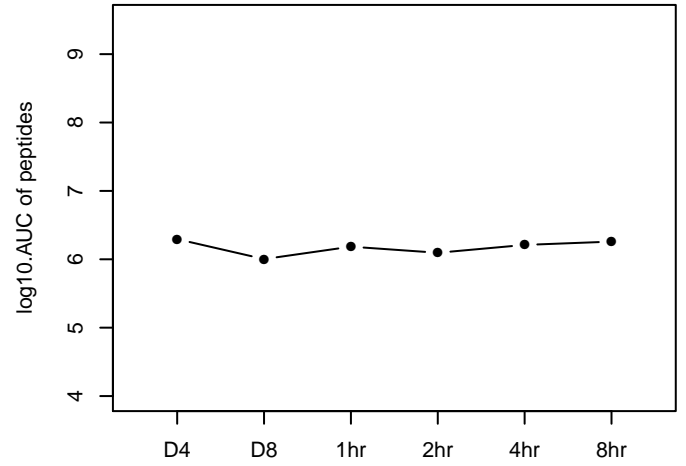**CR025\_HUMAN**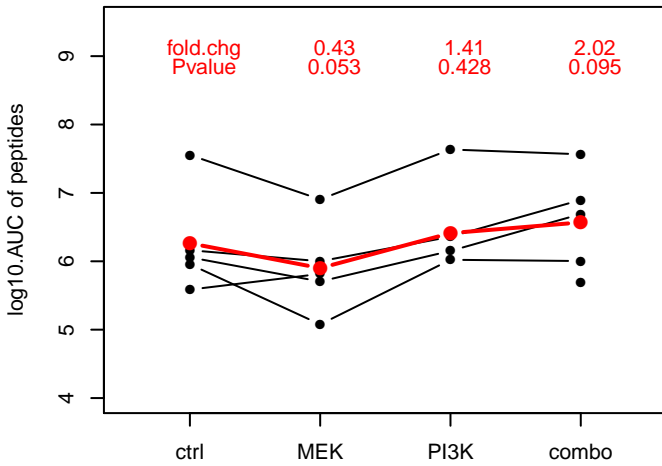**CR025\_HUMAN**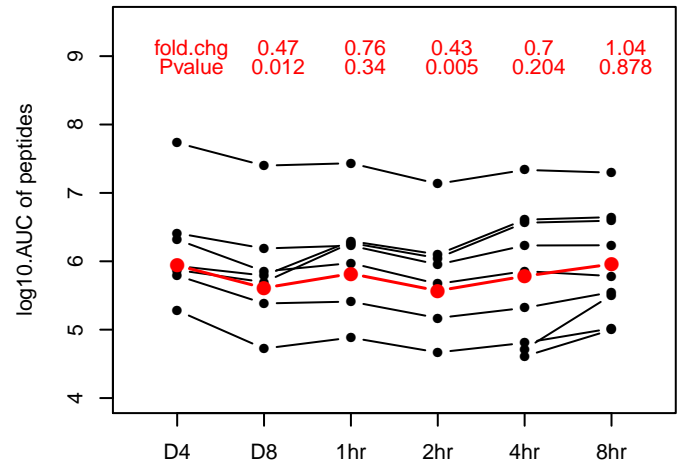**CRCM\_HUMAN**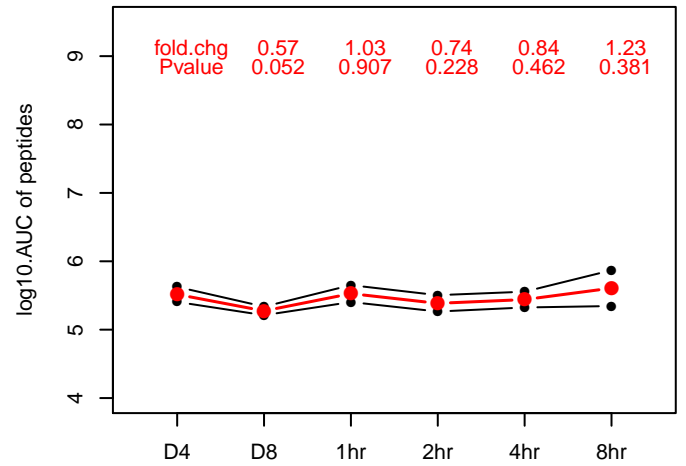

**CS029\_HUMAN**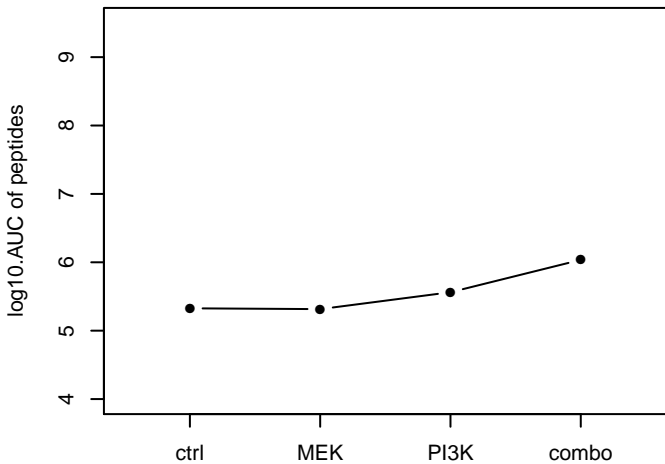**CS029\_HUMAN**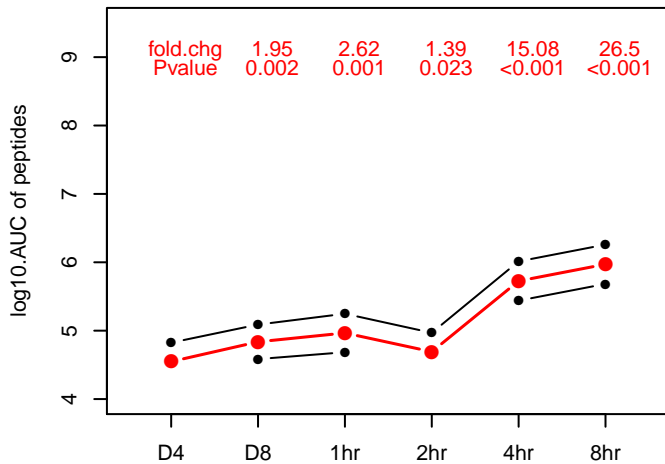**CSDE1\_HUMAN**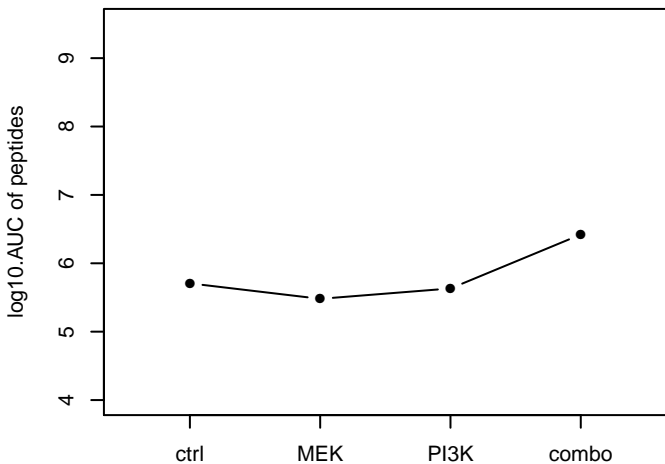**CSDE1\_HUMAN**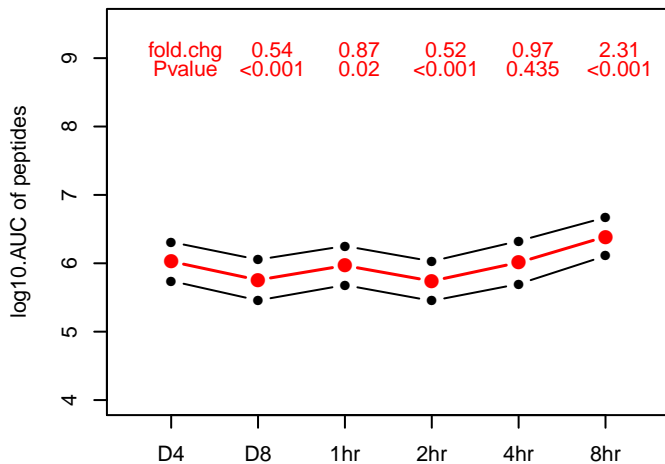**CSN1\_HUMAN**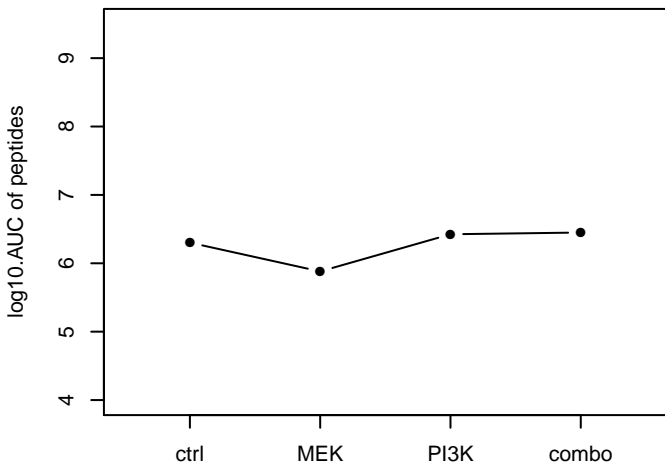**CSN1\_HUMAN**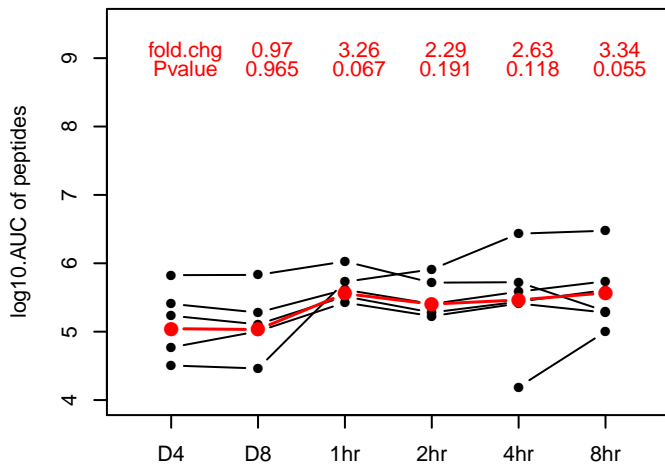

### CSN3\_HUMAN

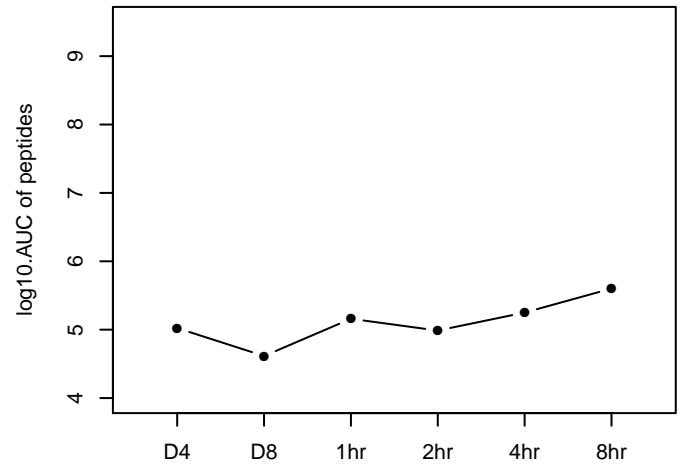

### CTBP1\_HUMAN

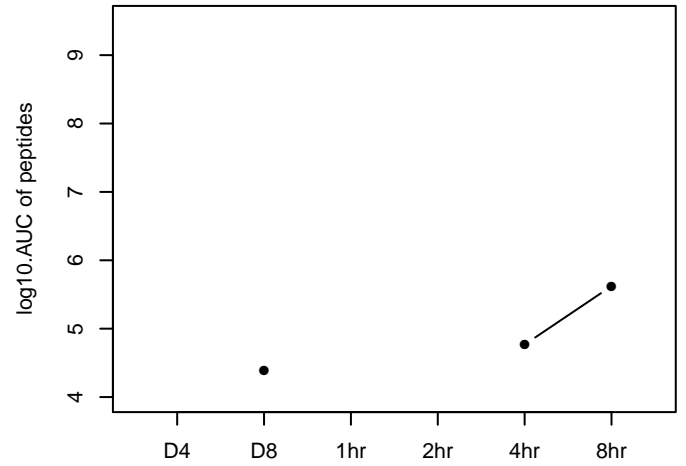

### CTDP1\_HUMAN

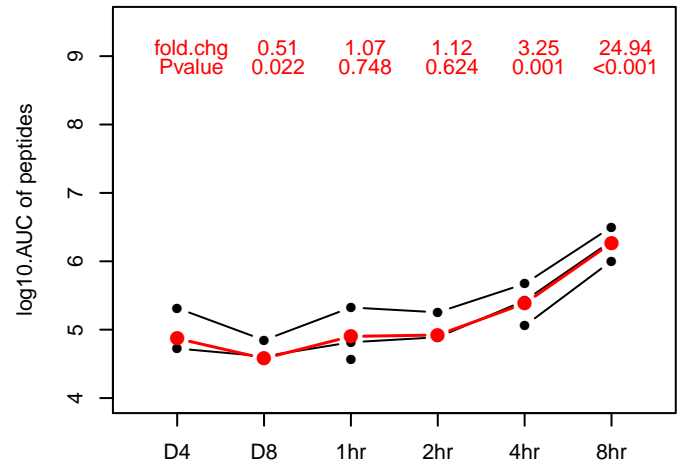

**CTR2\_HUMAN**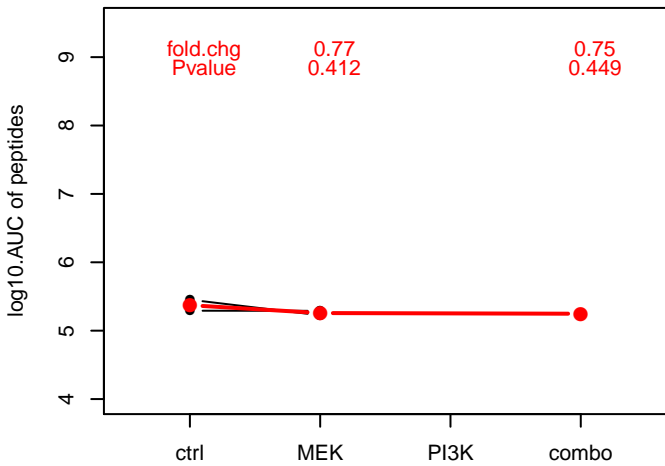**CTR2\_HUMAN**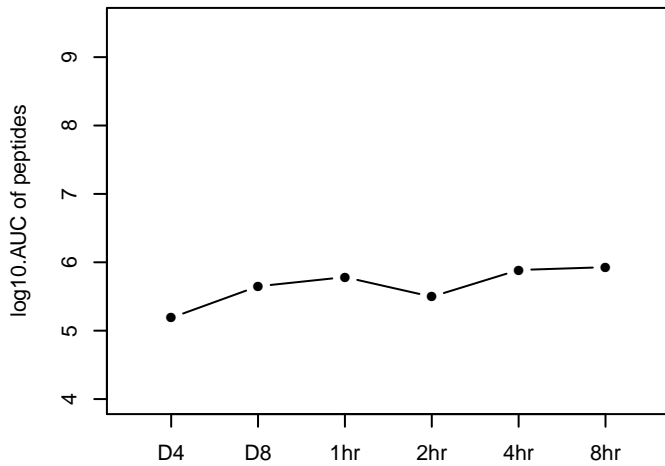**CTSL2\_HUMAN**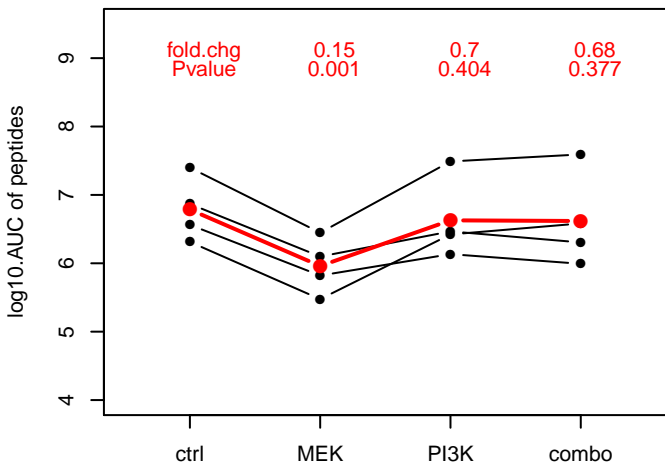**CTSL2\_HUMAN**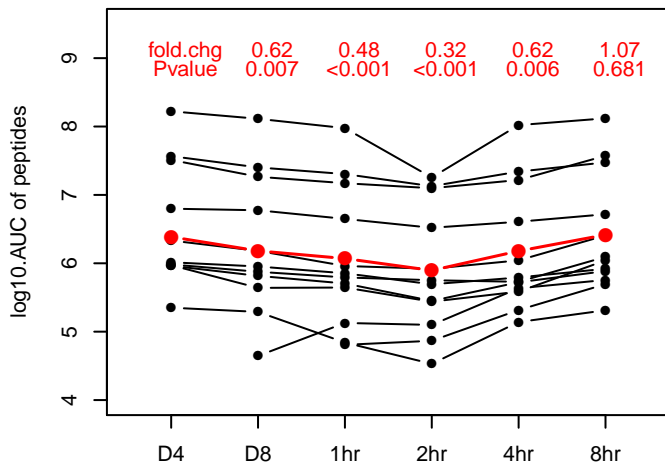**CUX1\_HUMAN**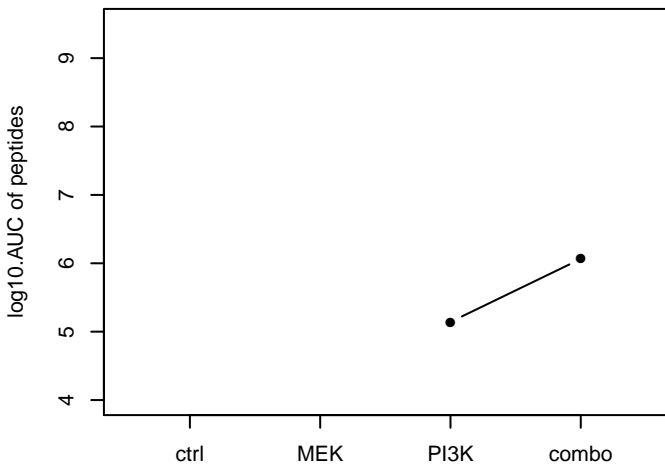**CUX1\_HUMAN**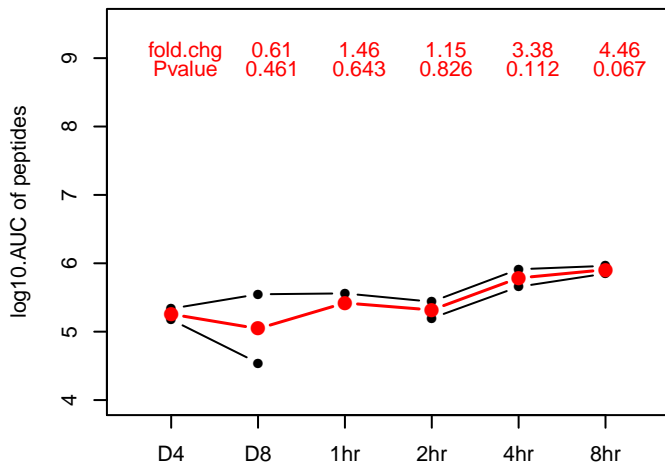



**CWC15\_HUMAN**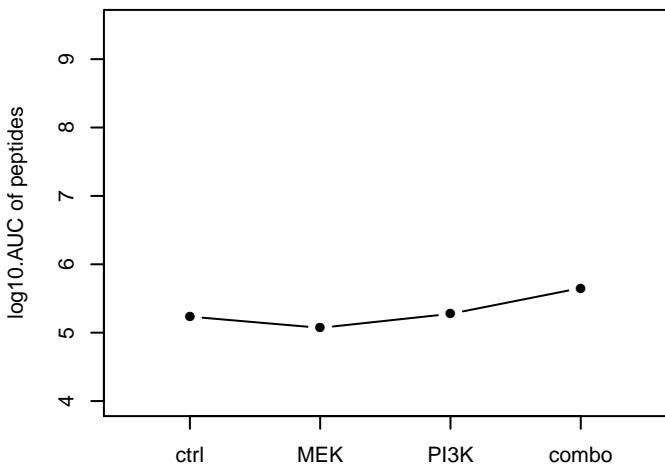**CWC15\_HUMAN**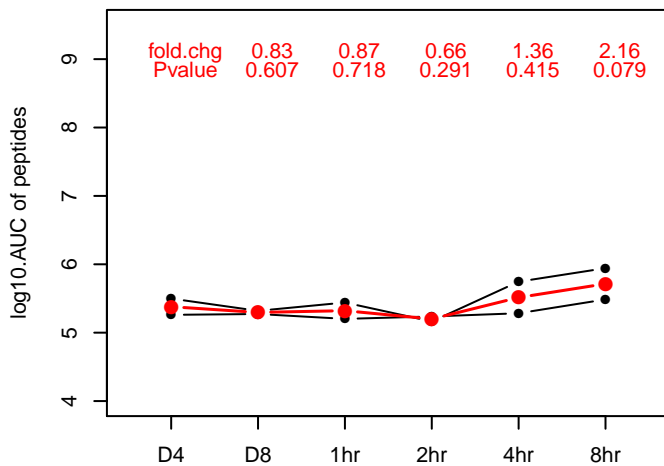**DAAM2\_HUMAN**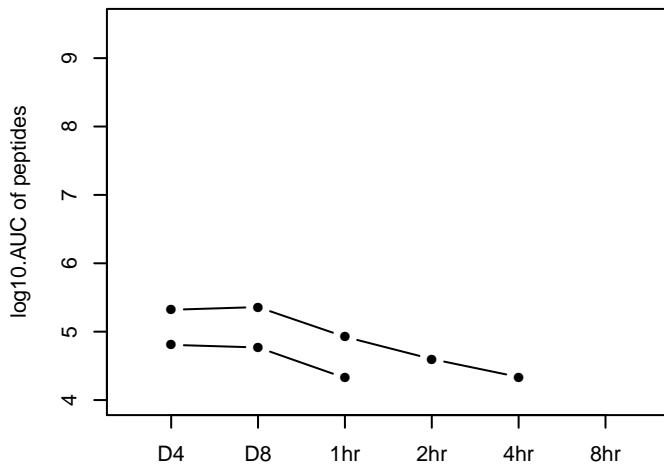**DBF4A\_HUMAN**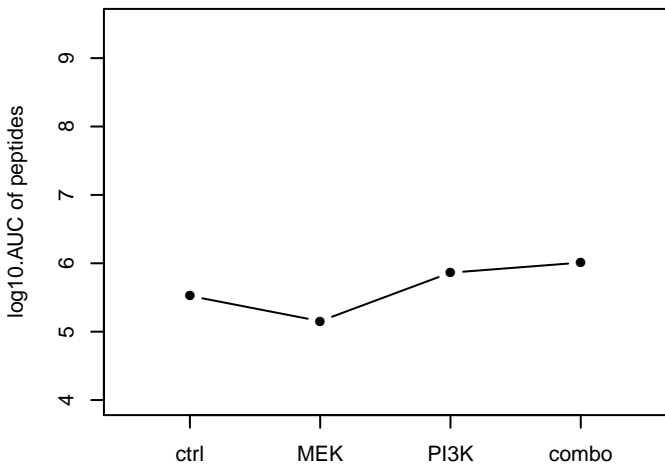**DBF4A\_HUMAN**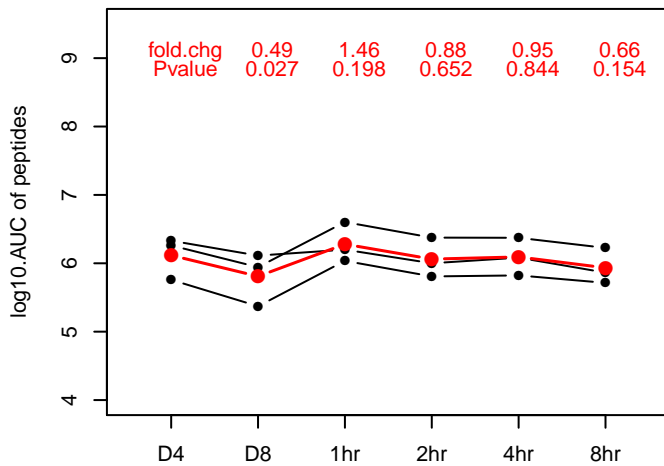

### DBNL\_HUMAN

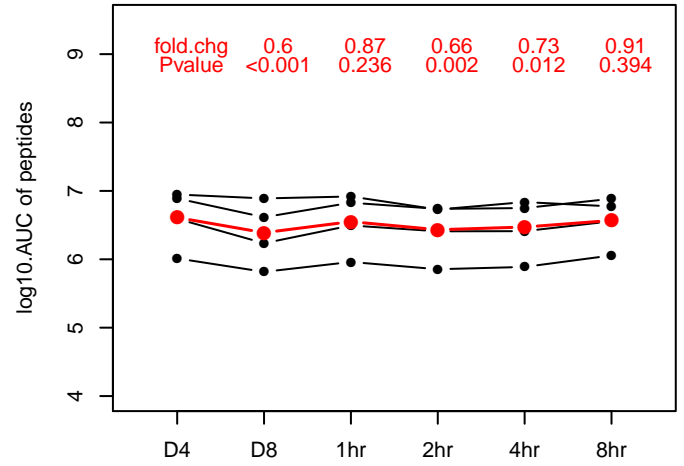

### DBPA\_HUMAN

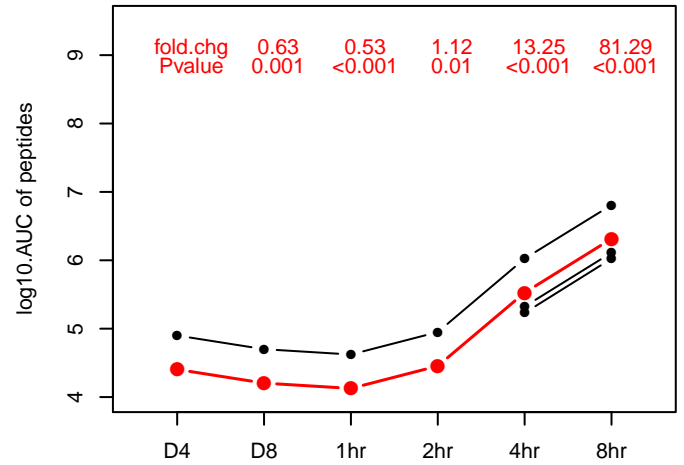

### DCK\_HUMAN

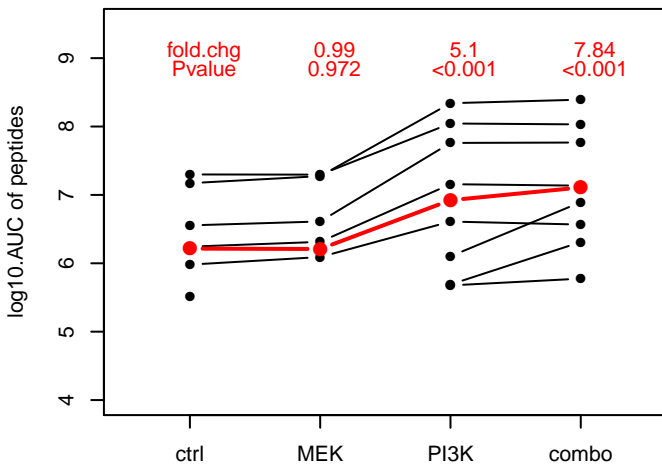

### DCK\_HUMAN

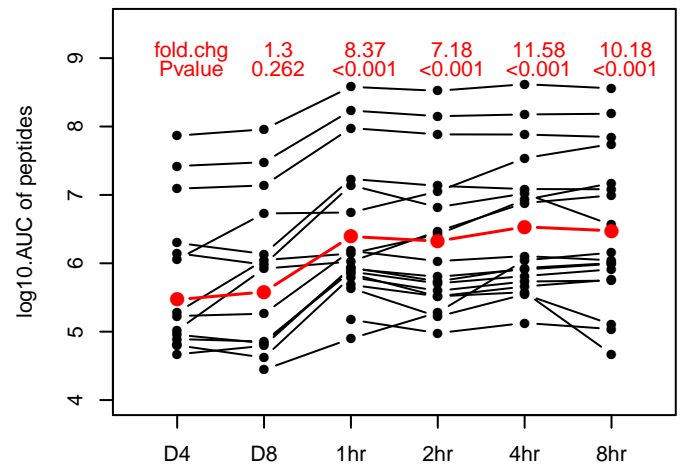

**DCNL1\_HUMAN**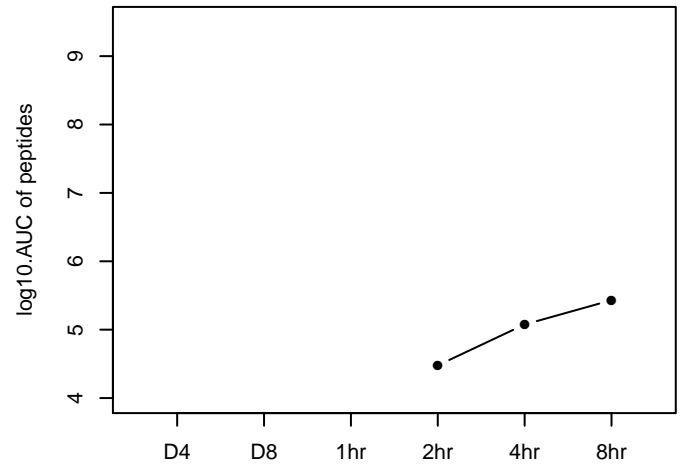**DCR1A\_HUMAN**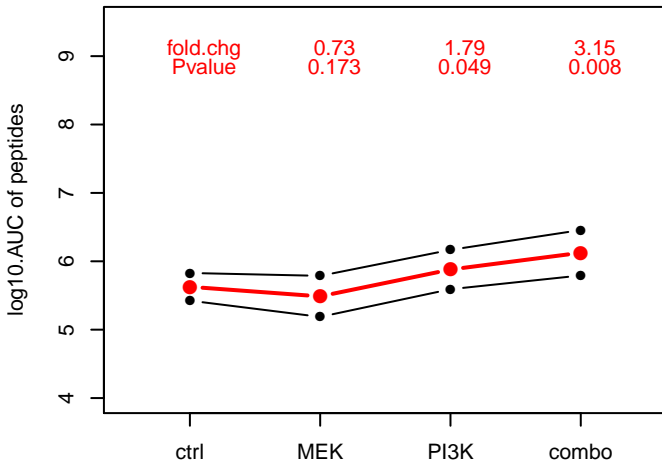**DCR1A\_HUMAN**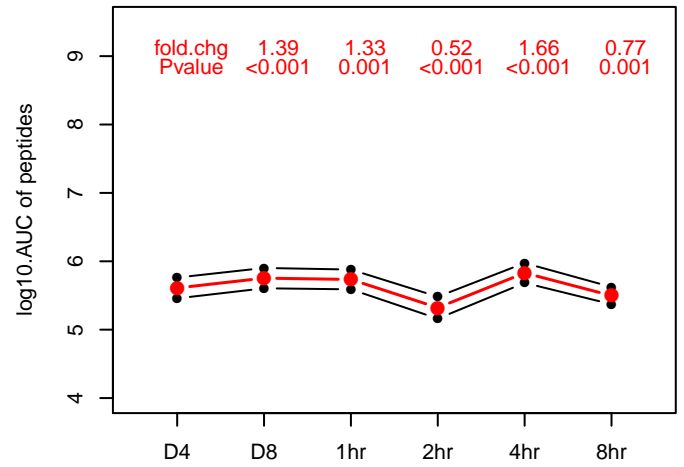**DCTN1\_HUMAN**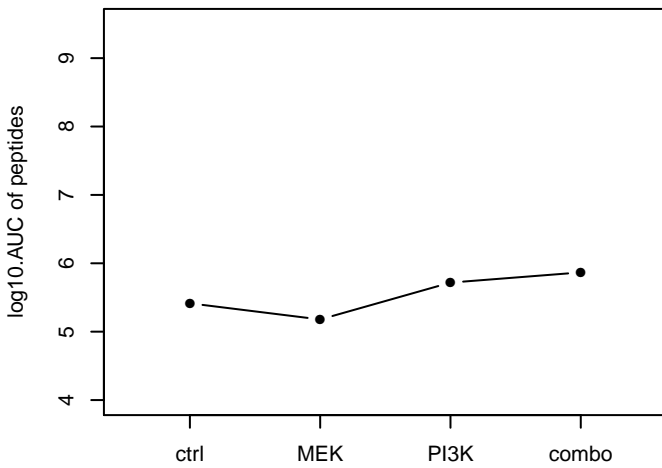**DCTN1\_HUMAN**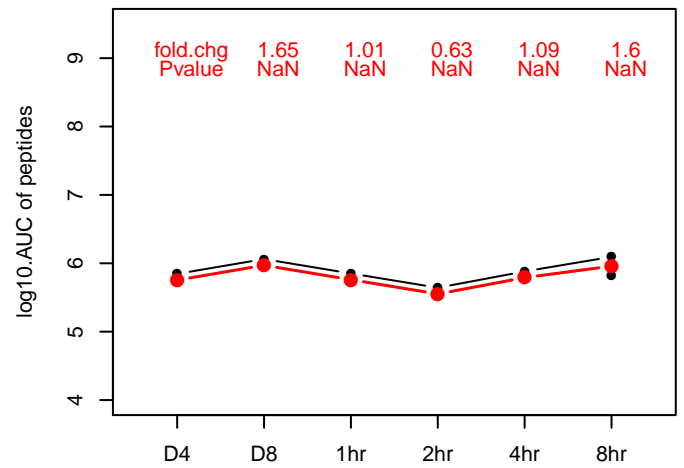

**DDX17\_HUMAN**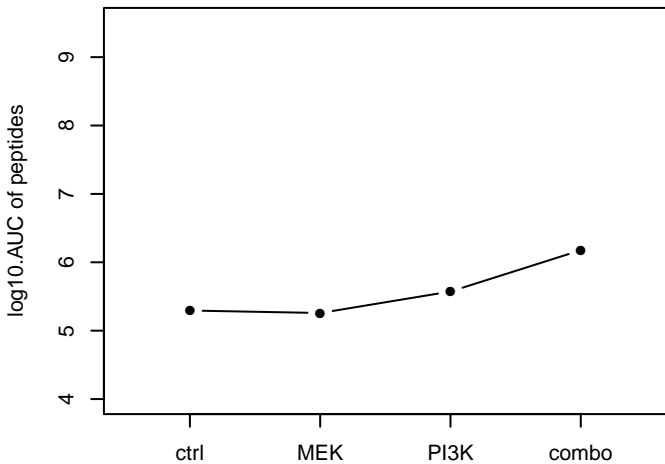**DDX17\_HUMAN**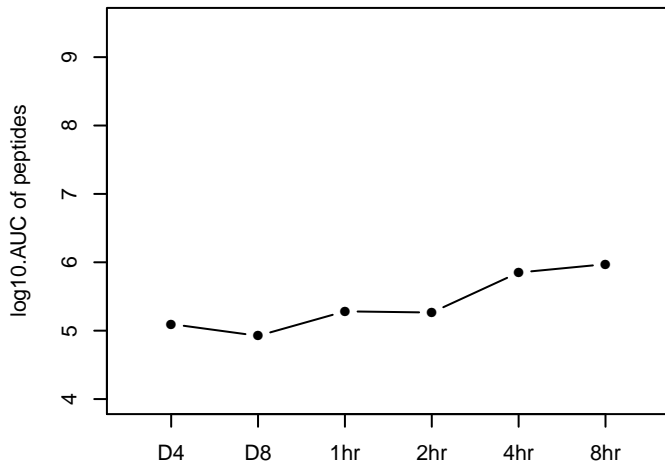**DDX18\_HUMAN**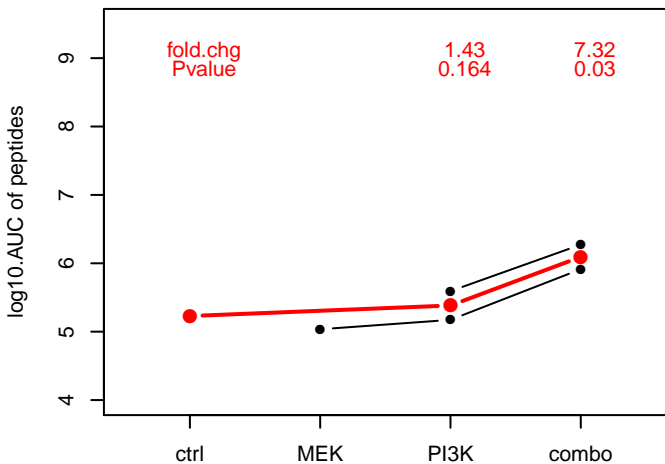**DDX18\_HUMAN**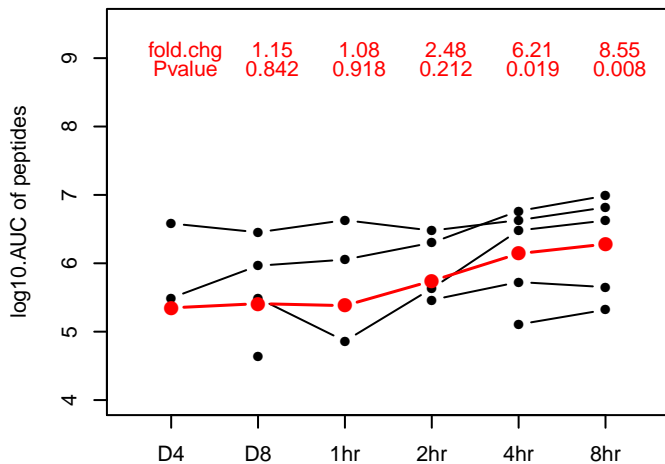**DDX20\_HUMAN**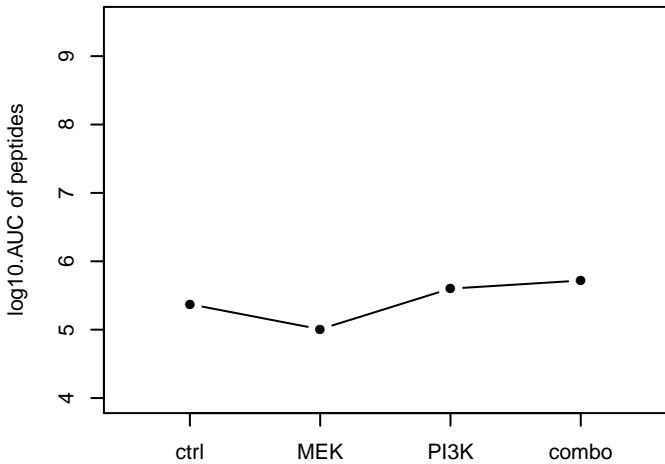**DDX20\_HUMAN**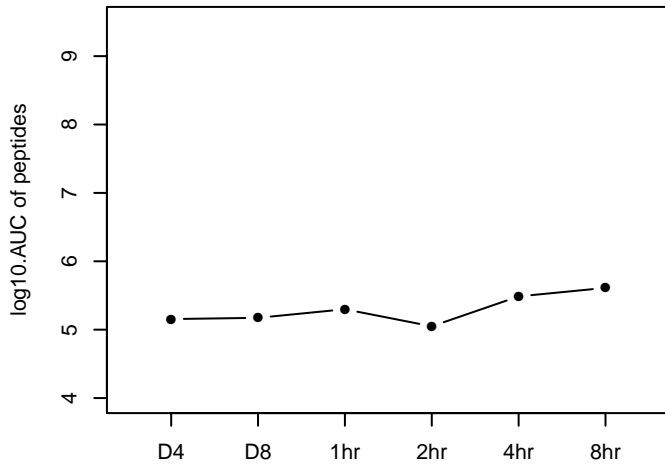

### DDX21\_HUMAN

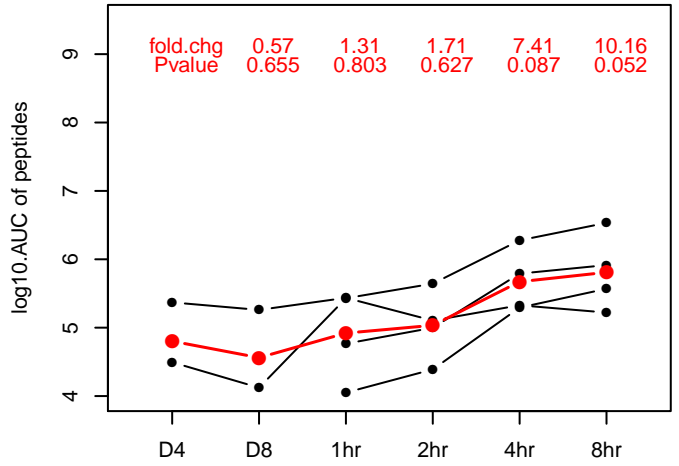

### DDX24\_HUMAN

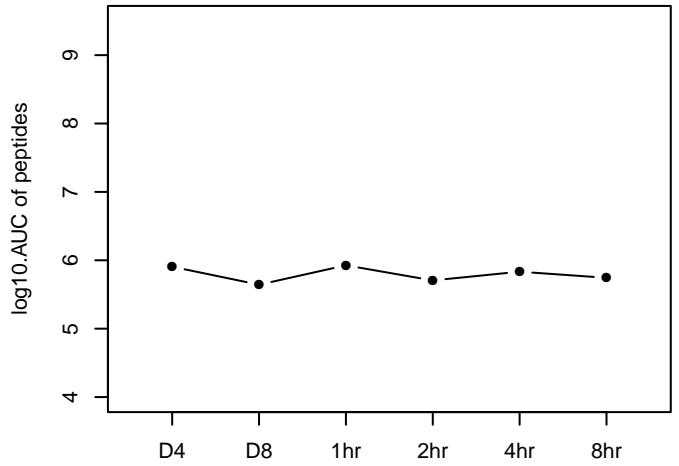

### DDX27\_HUMAN

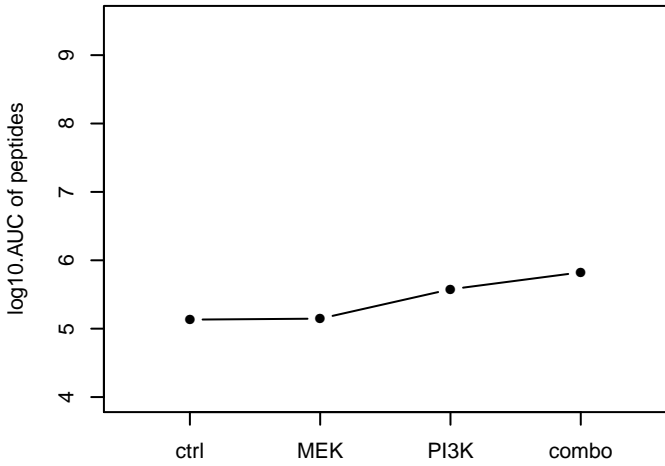

### DDX27\_HUMAN

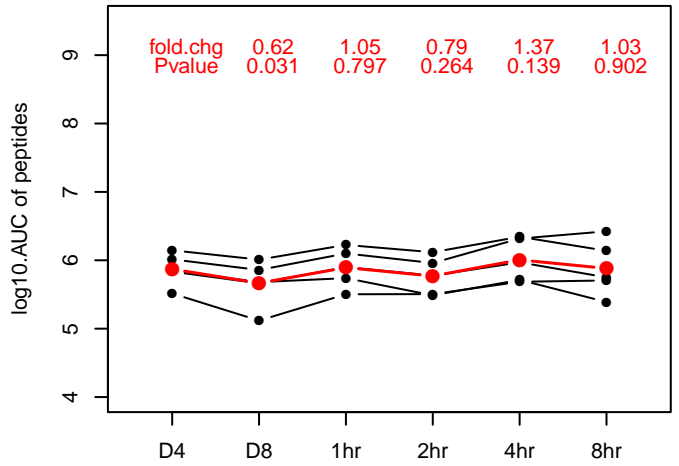

**DDX3X\_HUMAN**

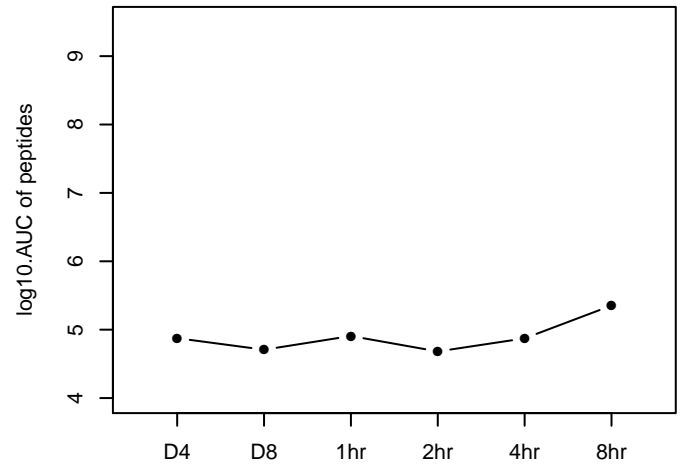

**DDX56\_HUMAN**

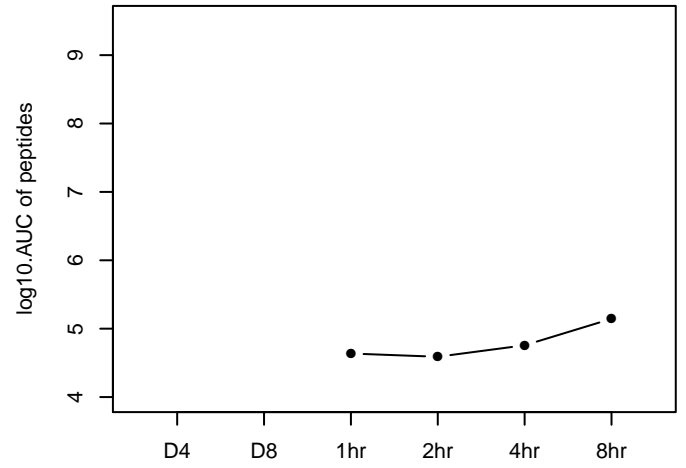

**DDX6\_HUMAN**

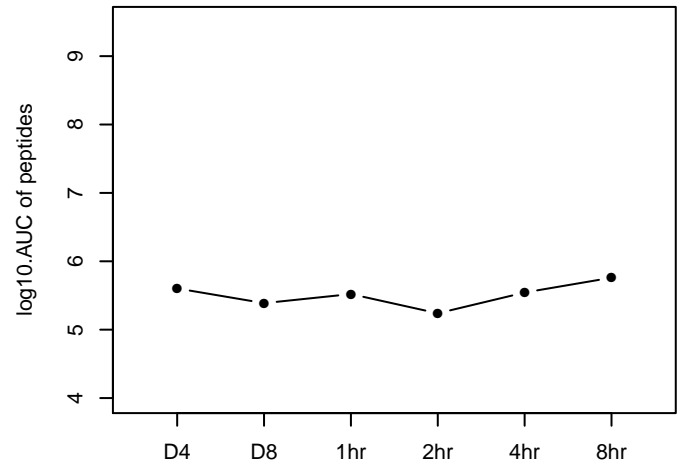

**DEN2A\_HUMAN**

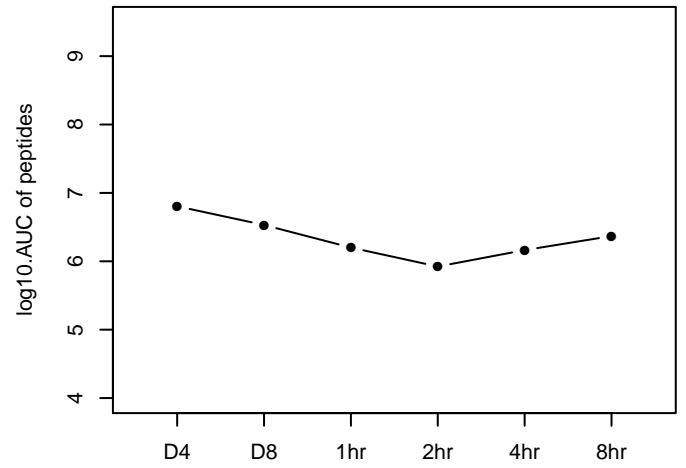

**DESP\_HUMAN**

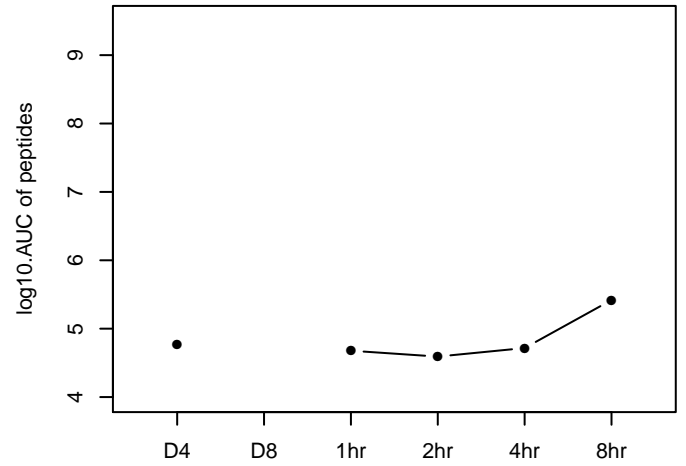

**DHX15\_HUMAN**

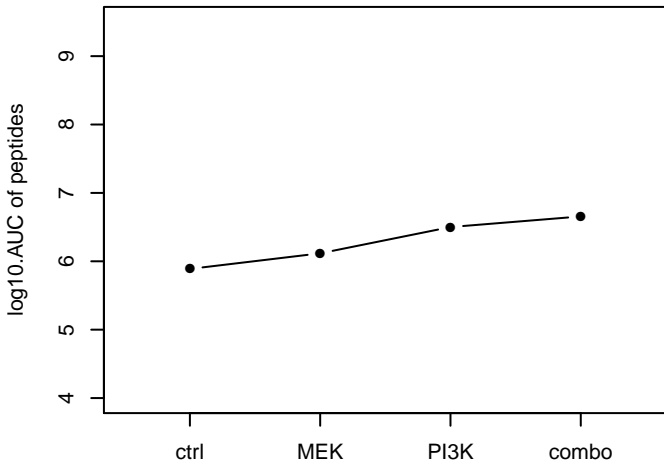

**DHX9\_HUMAN**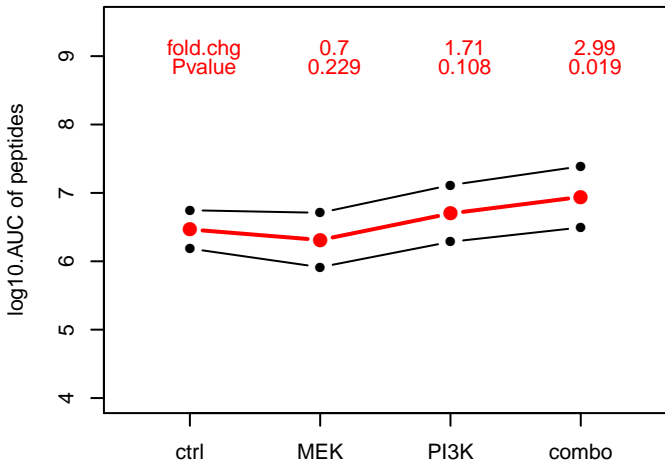**DHX9\_HUMAN**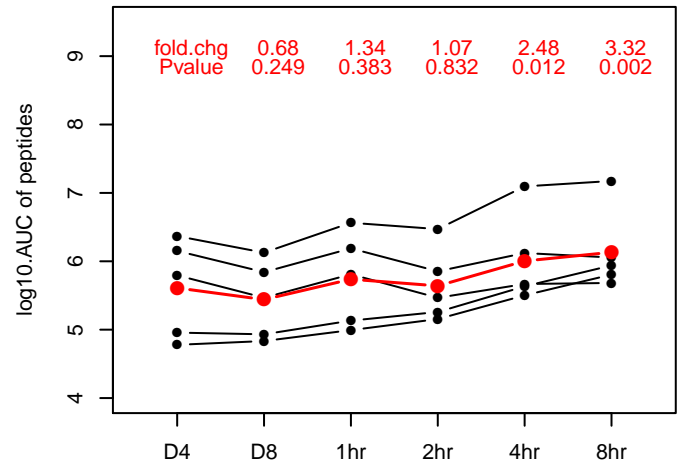**DHYS\_HUMAN**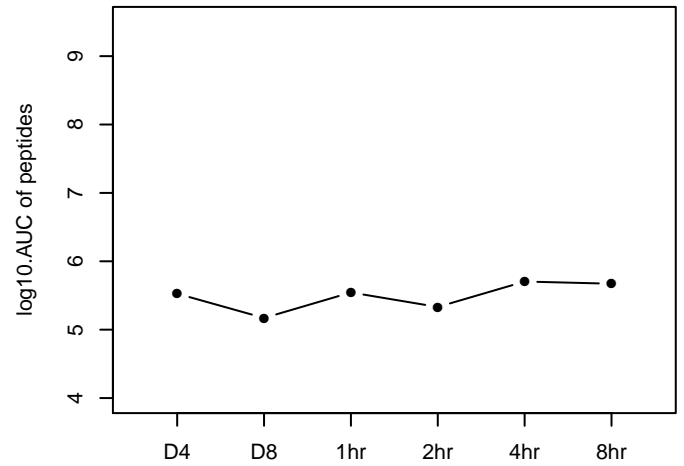**DIEXF\_HUMAN**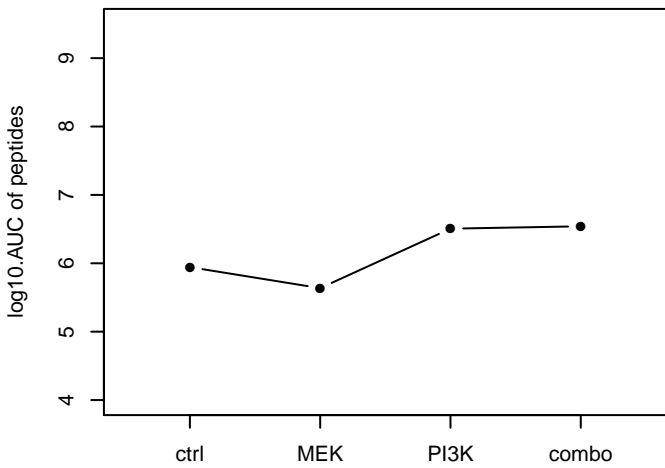**DIEXF\_HUMAN**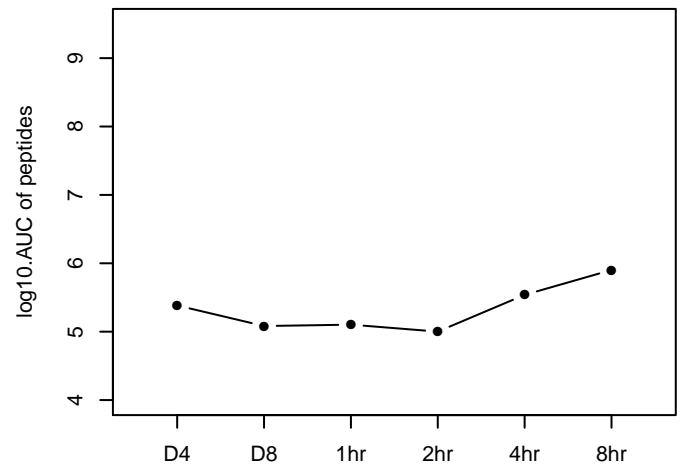



**DIP2B\_HUMAN**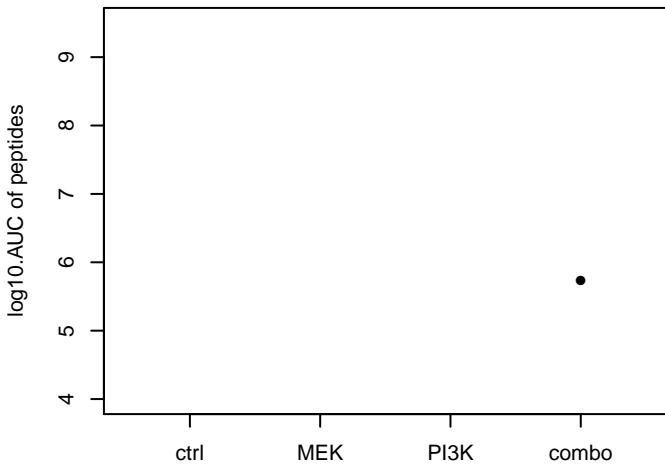**DIP2B\_HUMAN**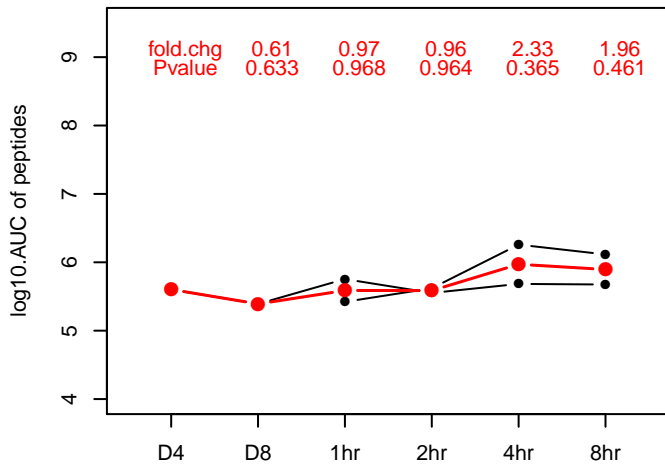**DJB11\_HUMAN**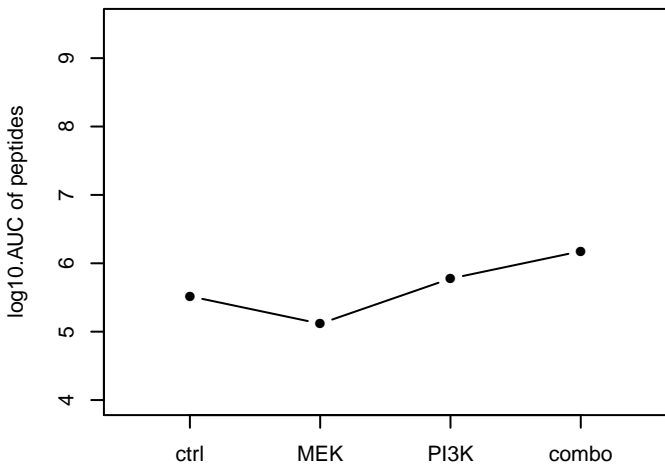**DJB11\_HUMAN**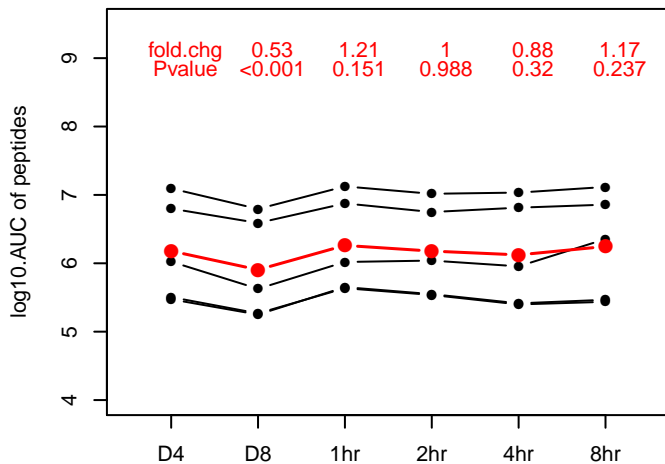**DJC30\_HUMAN**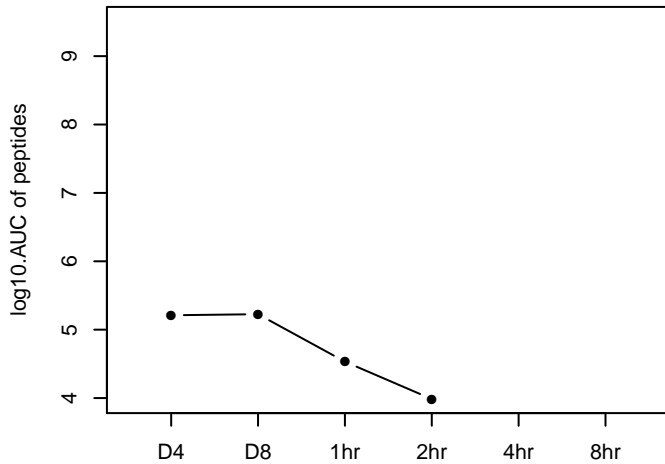

**DKC1\_HUMAN**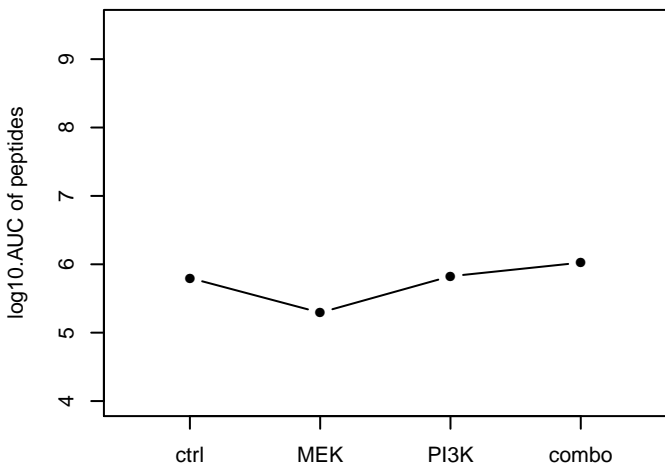**DKC1\_HUMAN**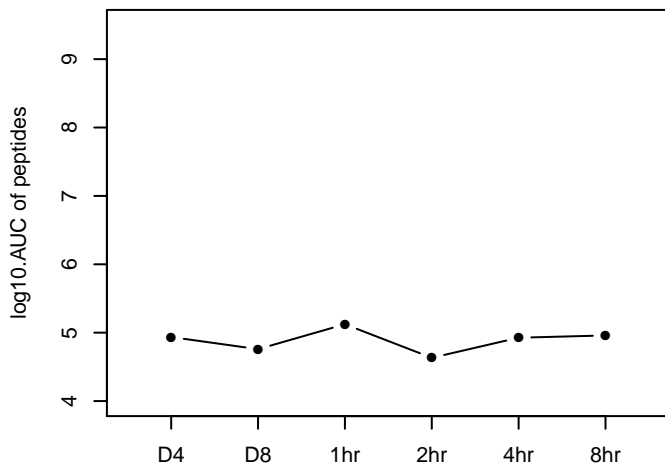**DLG1\_HUMAN**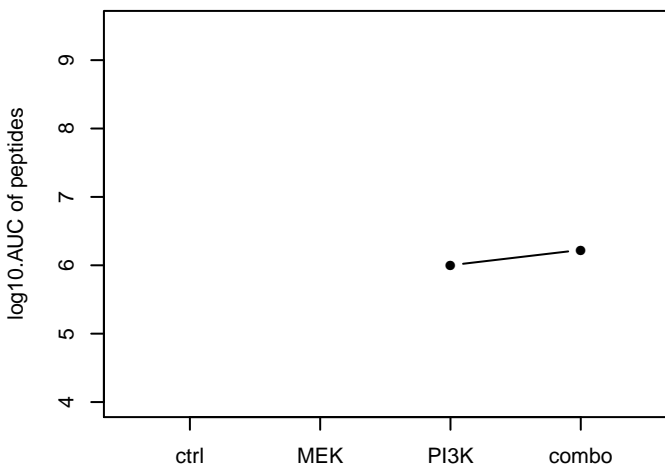**DLG1\_HUMAN**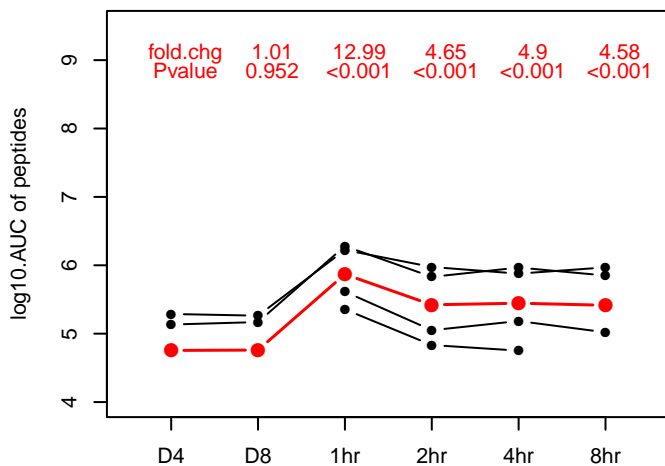**DNJA1\_HUMAN**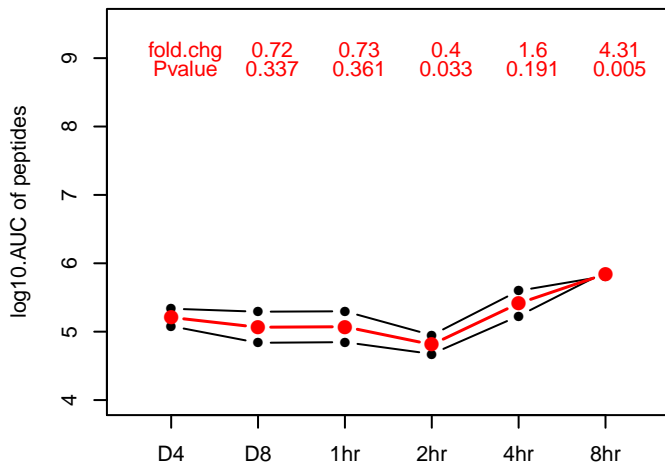

### DPOE1\_HUMAN

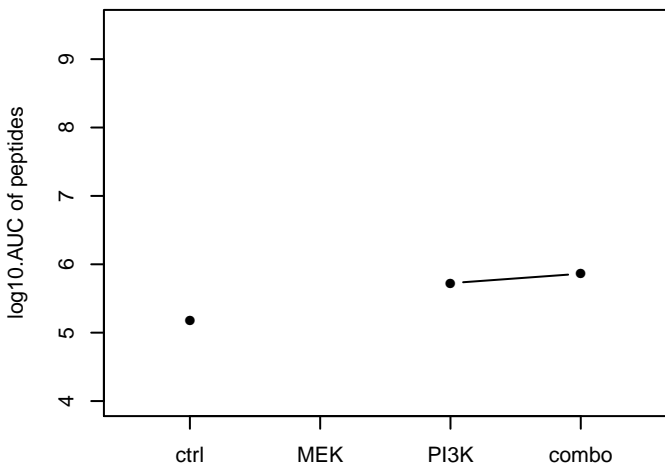

### DPOE1\_HUMAN

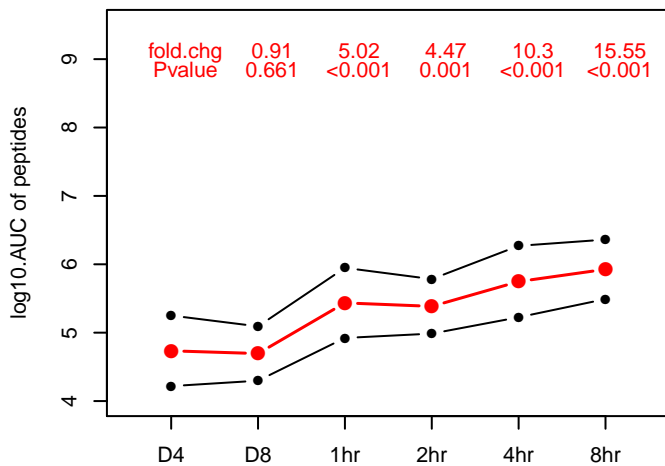

### DPOLZ\_HUMAN

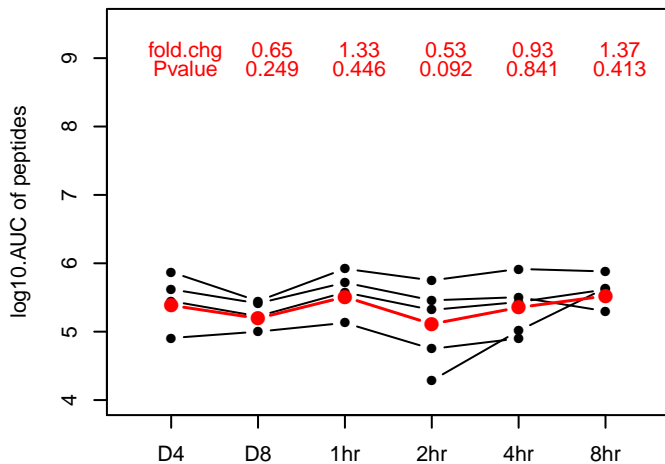

### DREB\_HUMAN

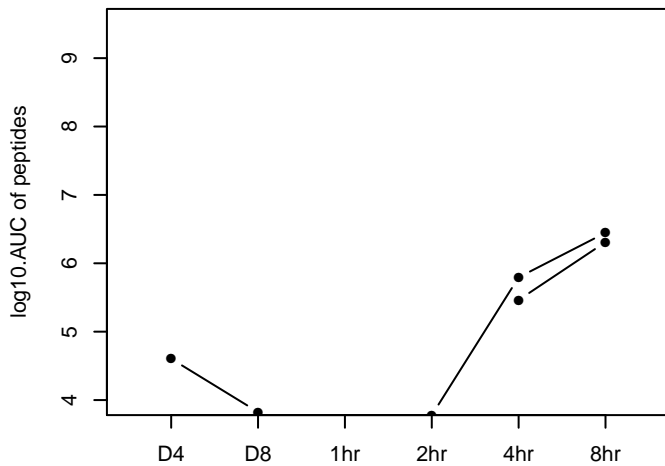

**DSRAD\_HUMAN**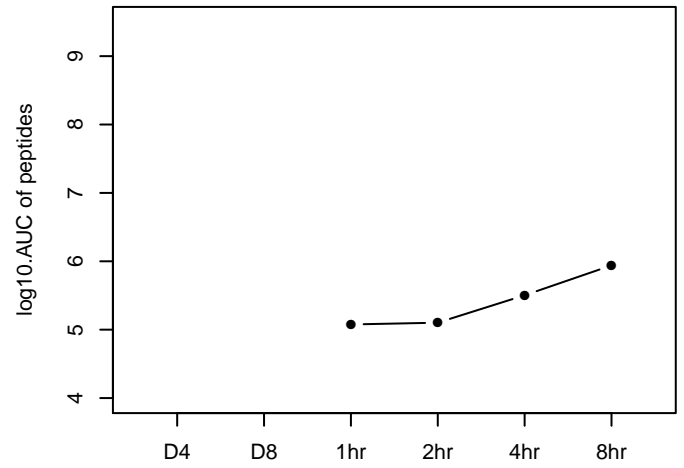**DTX3L\_HUMAN**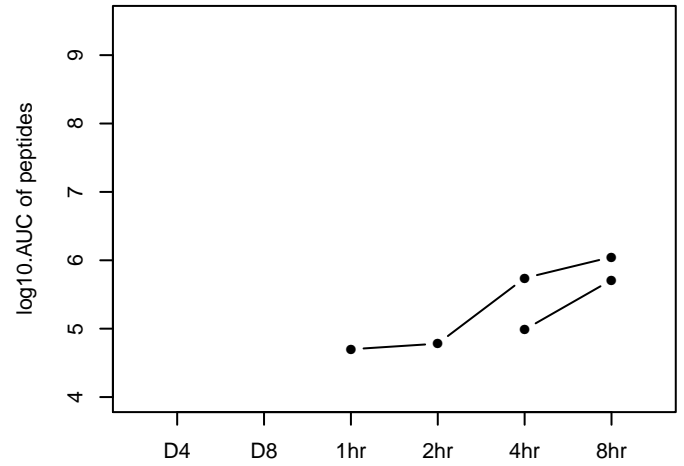**DUS12\_HUMAN**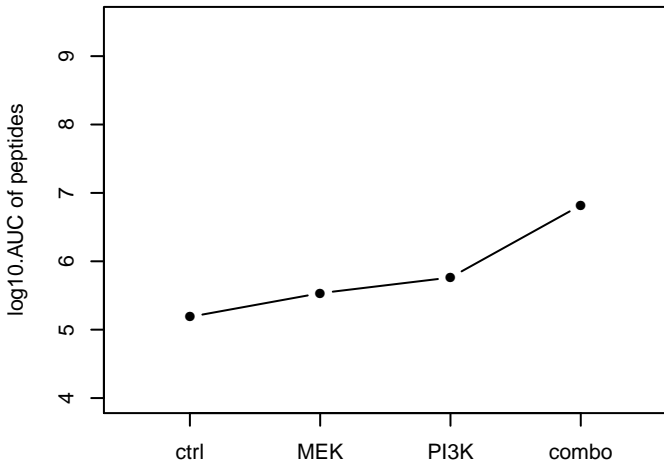**DUS12\_HUMAN**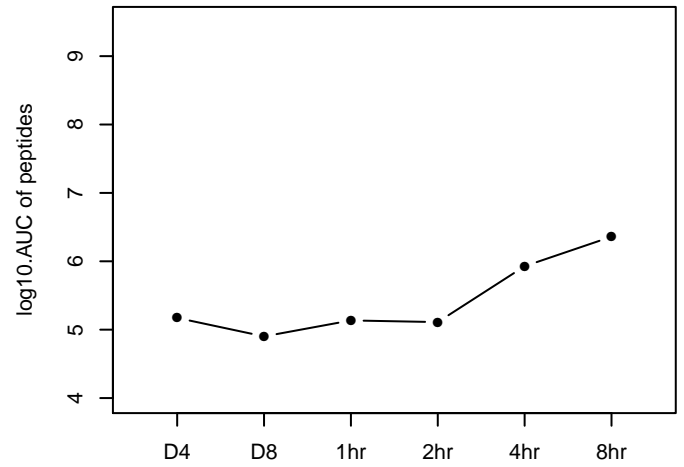

**DUS3\_HUMAN**

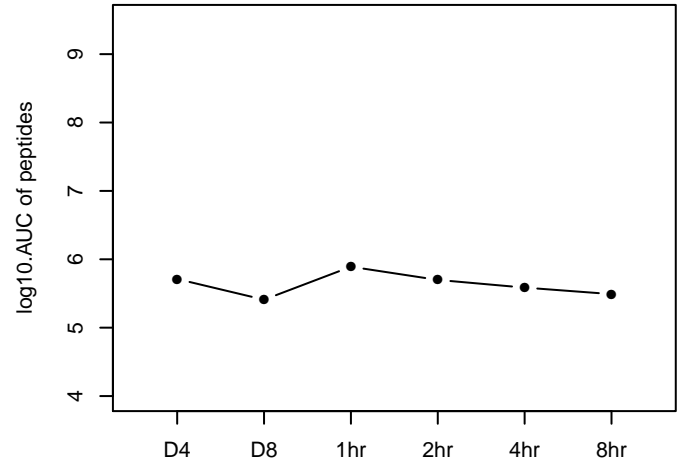

**DUS3L\_HUMAN**

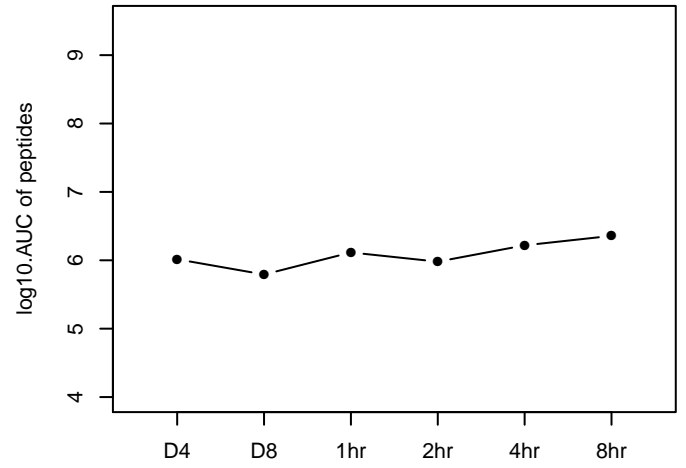

**DYHC1\_HUMAN**

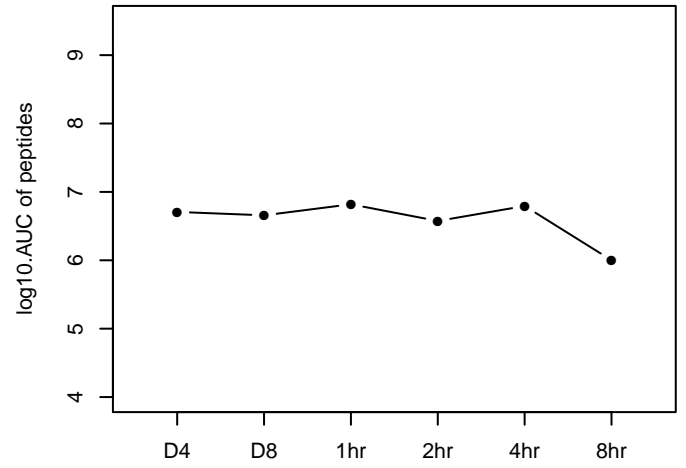

**DYST\_HUMAN**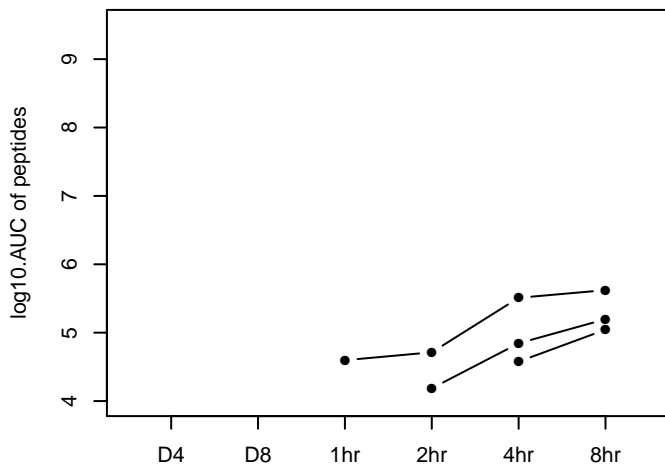**E41L2\_HUMAN**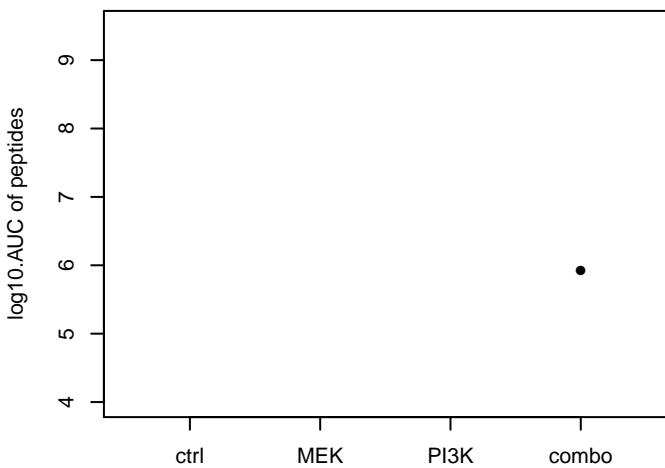**E41L2\_HUMAN**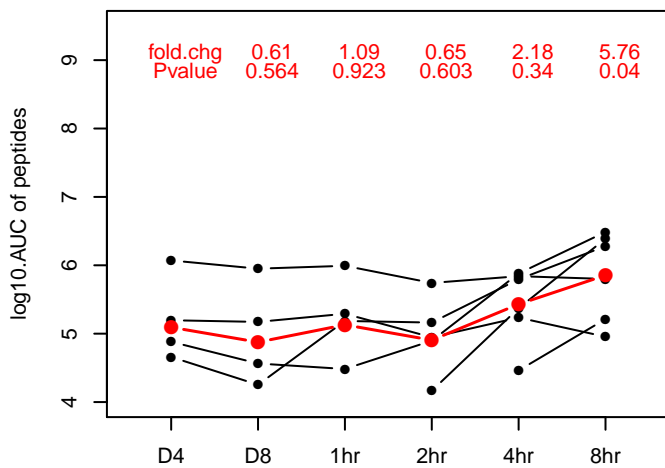**E41L3\_HUMAN**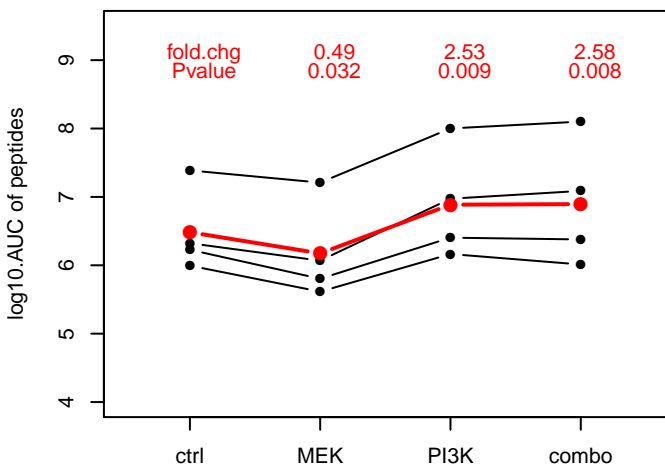**E41L3\_HUMAN**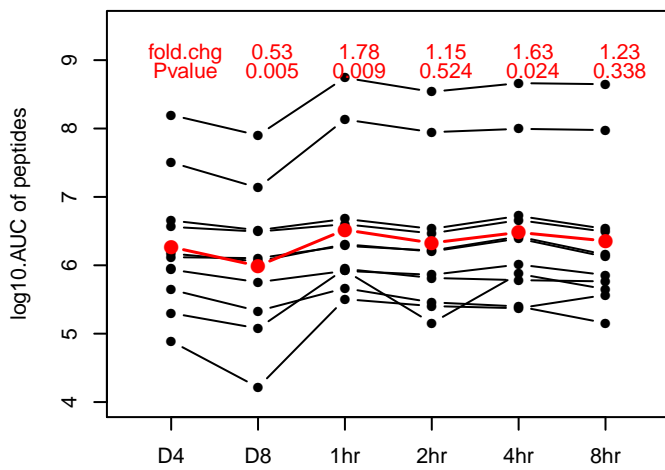

**E9PAX8\_HUMAN**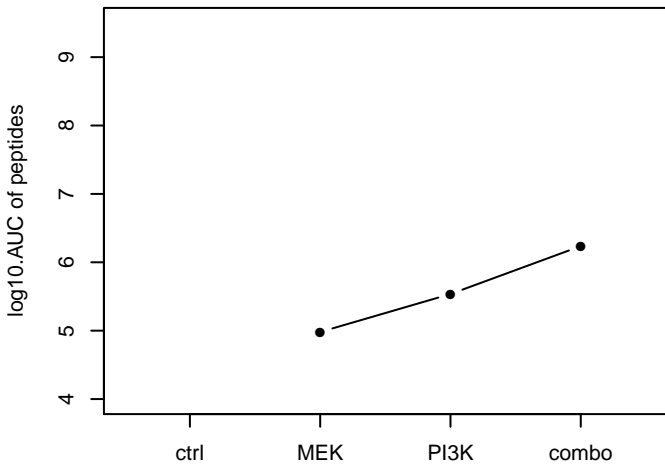**E9PAX8\_HUMAN**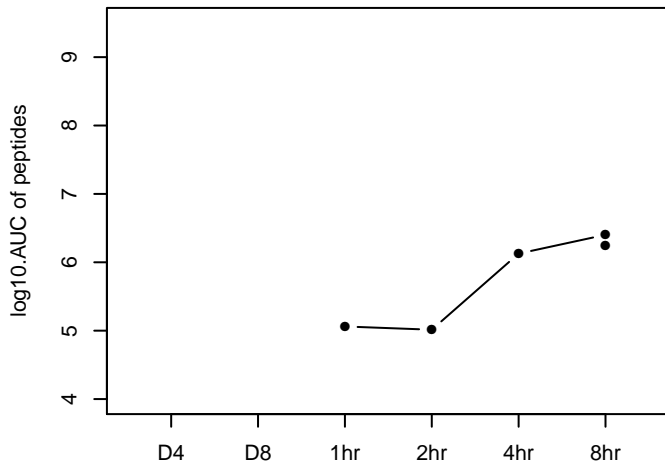**E9PEH3\_HUMAN**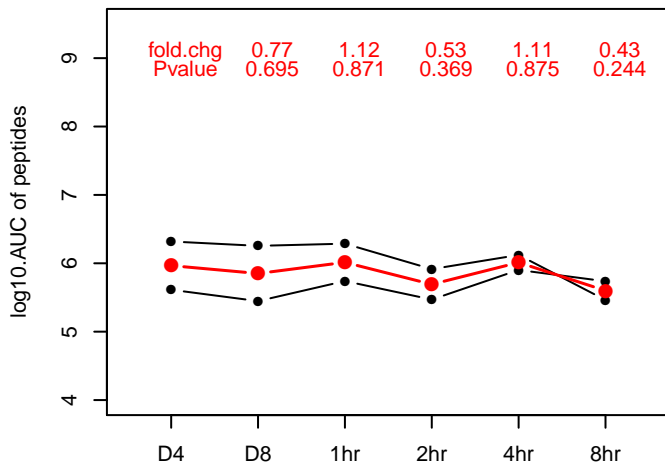**ECI1\_HUMAN**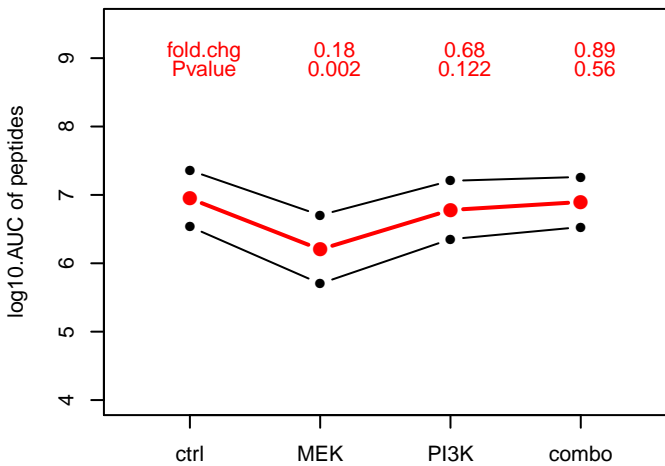**ECI1\_HUMAN**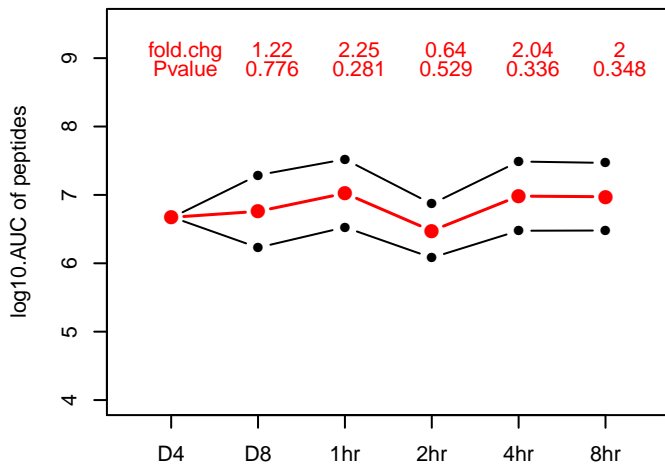

### EF1D\_HUMAN

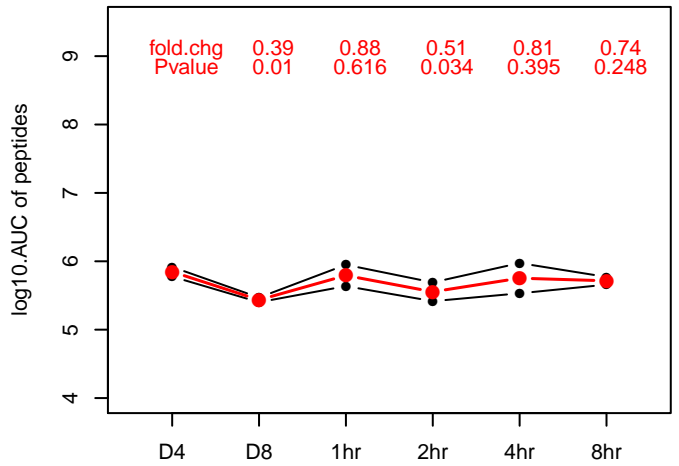

### EF1G\_HUMAN

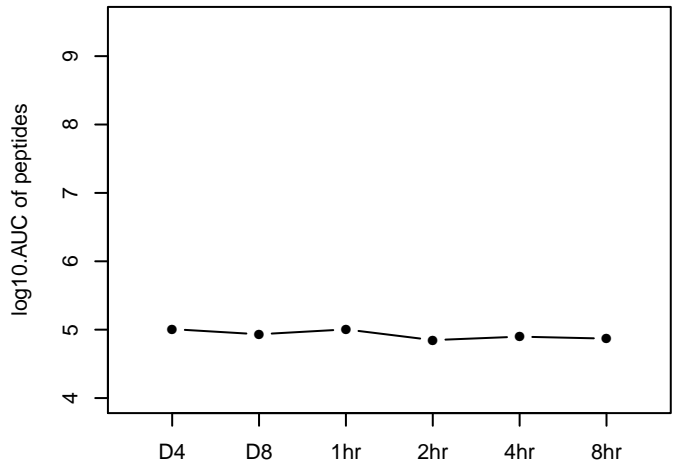

### EFR3A\_HUMAN

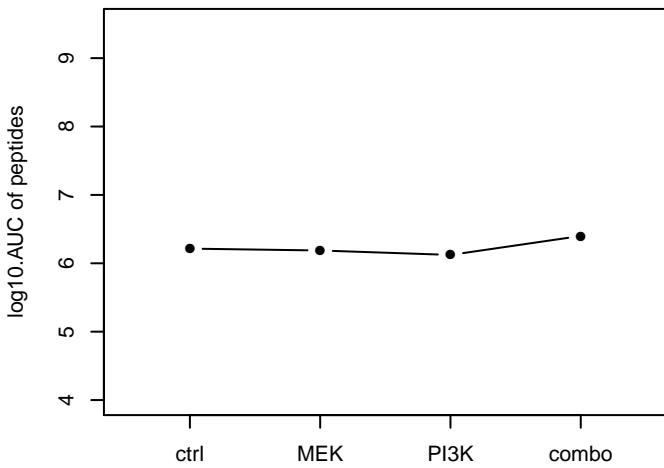

### EFR3A\_HUMAN

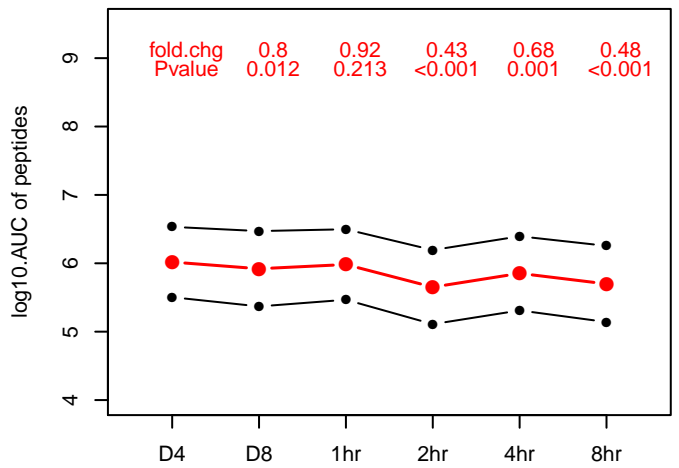



**EH1L1\_HUMAN**

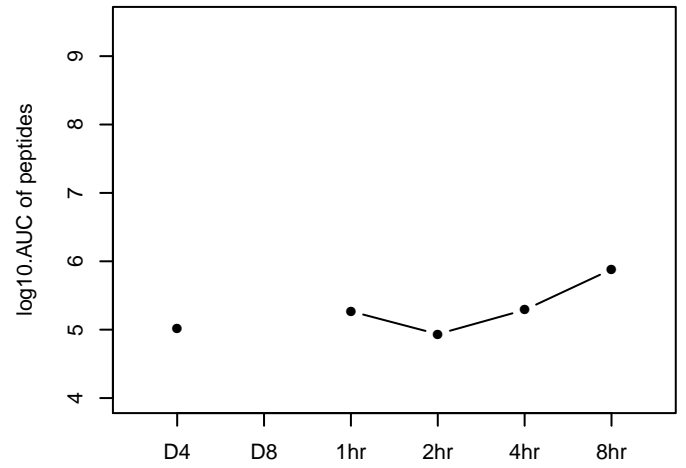

**EIF3B\_HUMAN**

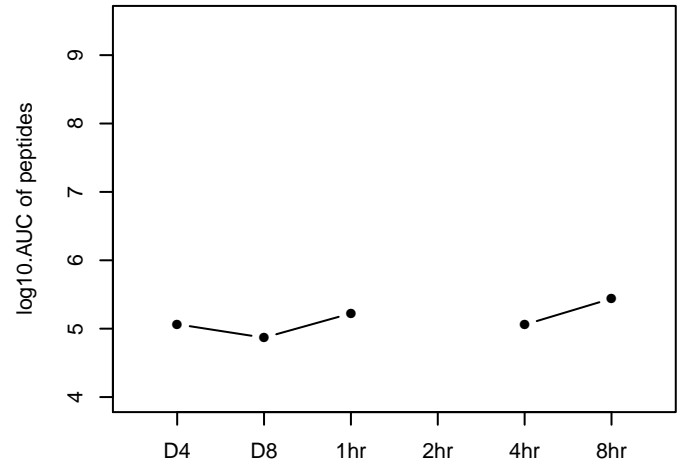

**EIF3E\_HUMAN**

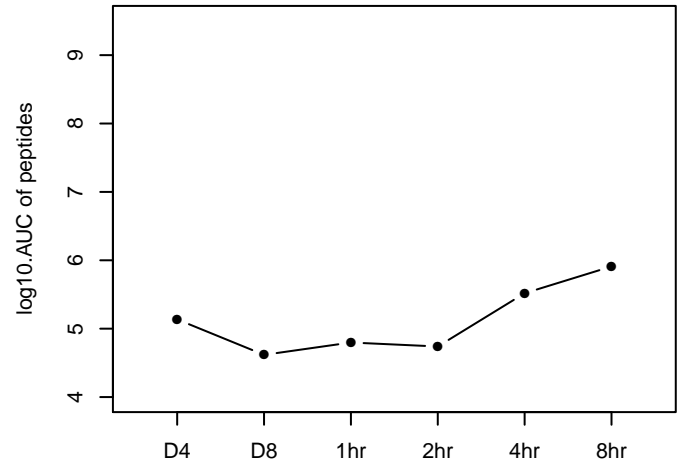

### ELAV1\_HUMAN

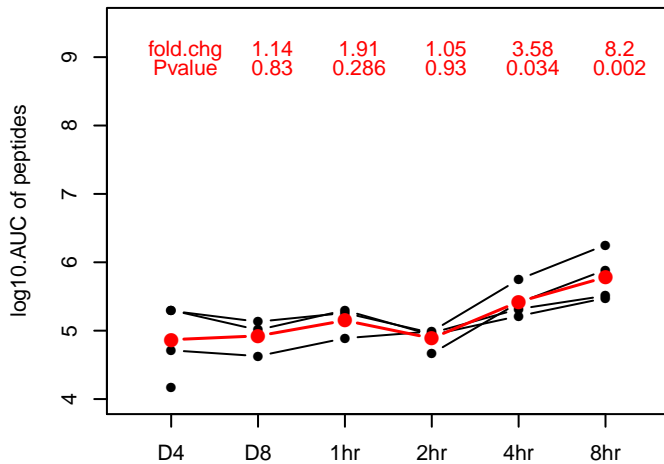

### ELF1\_HUMAN

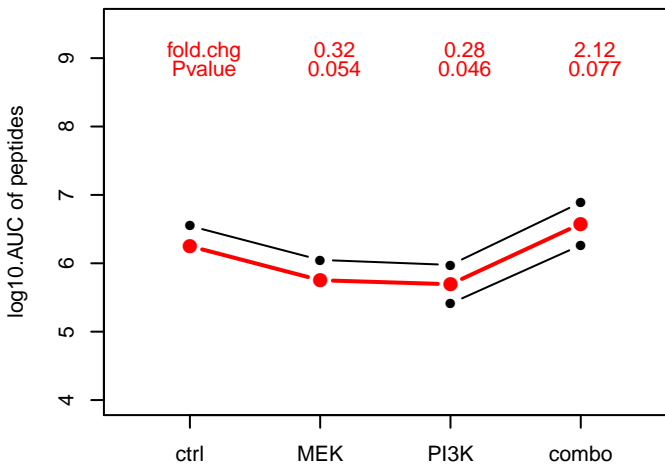

### ELF1\_HUMAN

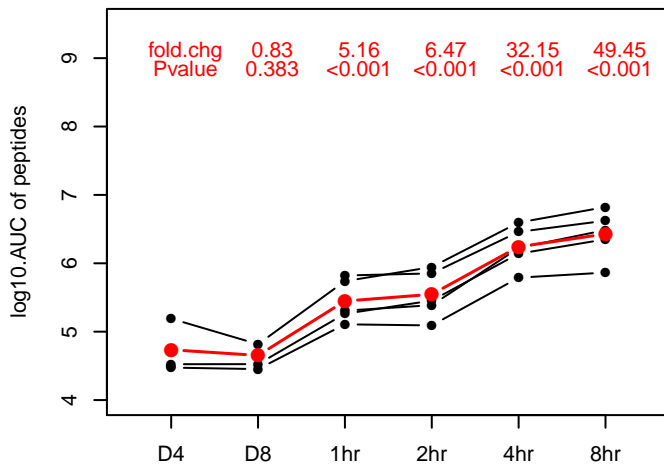

### ELYS\_HUMAN

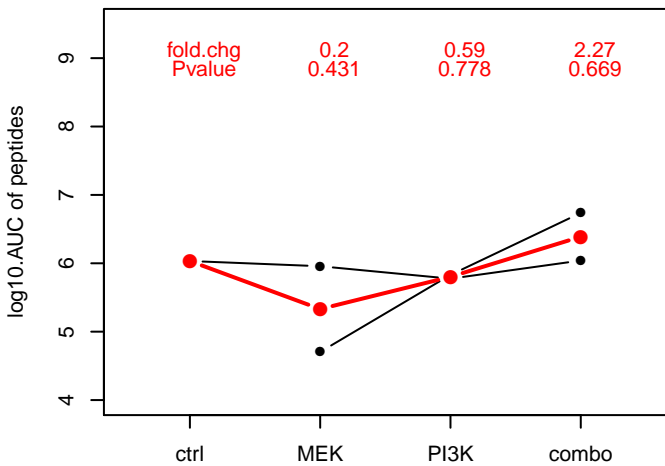

### ELYS\_HUMAN

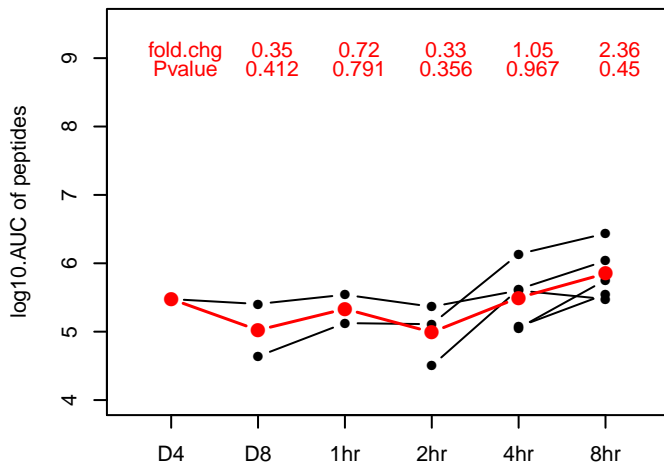

### ENAH\_HUMAN

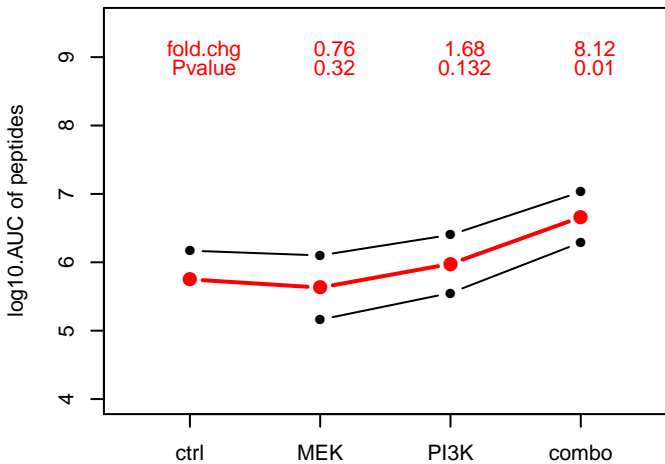

### ENAH\_HUMAN

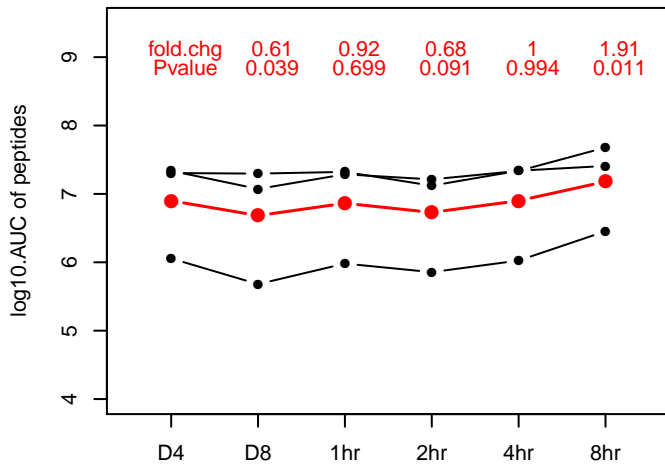

### ENASE\_HUMAN

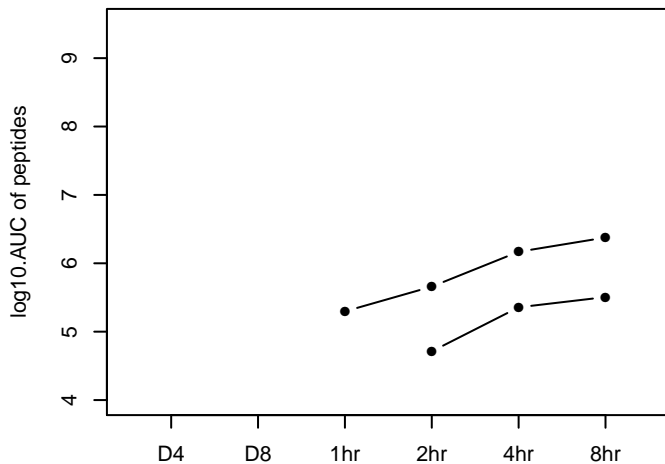

### ENPL\_HUMAN

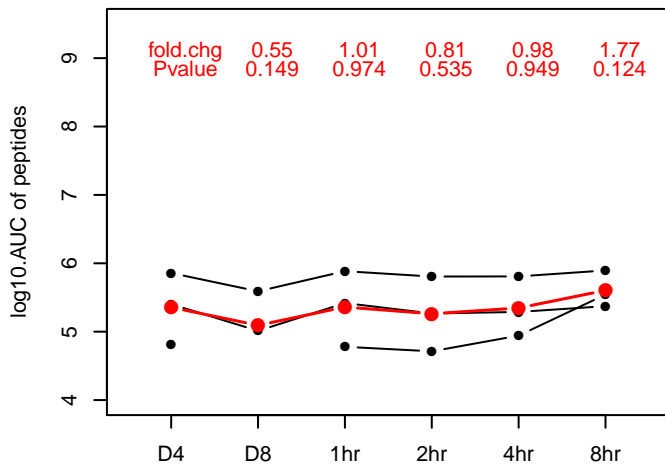

### ENSA\_HUMAN

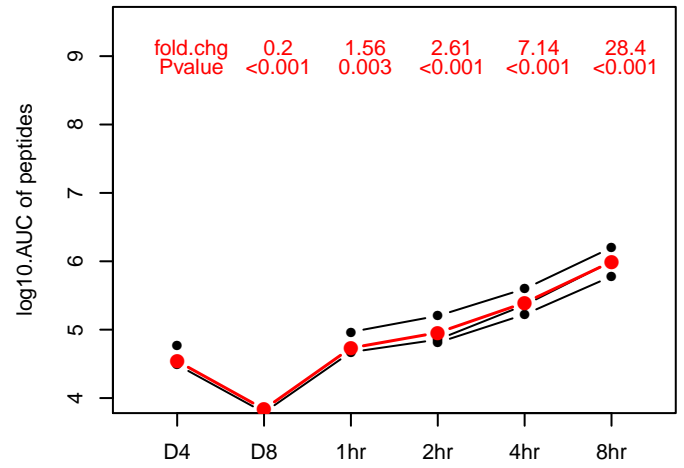

### EP15R\_HUMAN

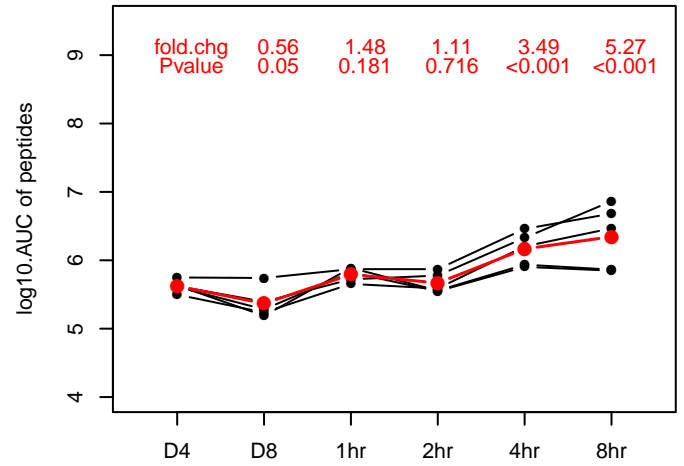

### EP300\_HUMAN

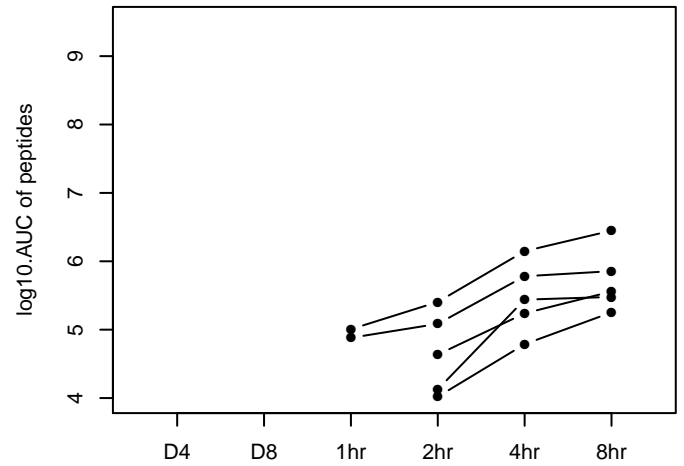

**EP400\_HUMAN**

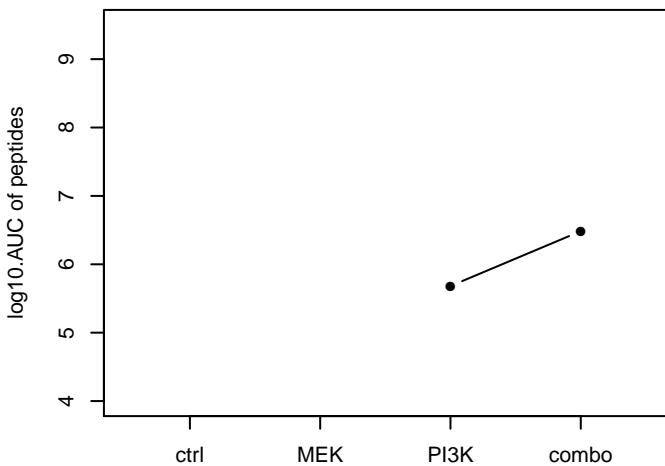

**EP400\_HUMAN**

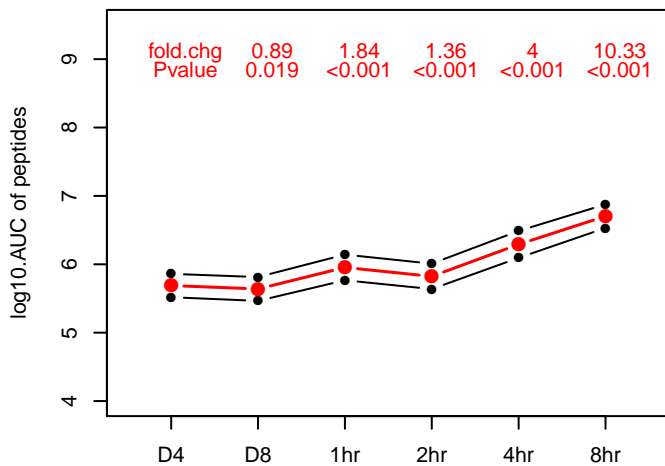

**EPS15\_HUMAN**

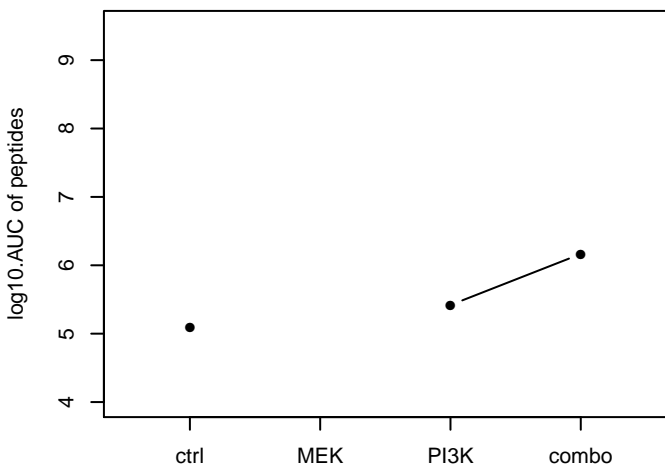

**EPS15\_HUMAN**

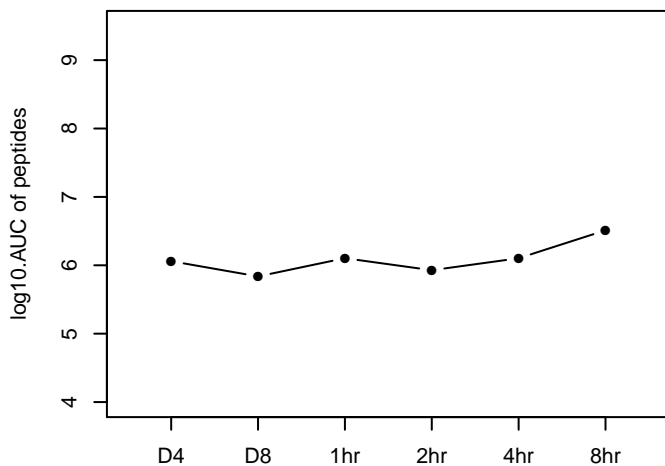

**EPS8\_HUMAN**

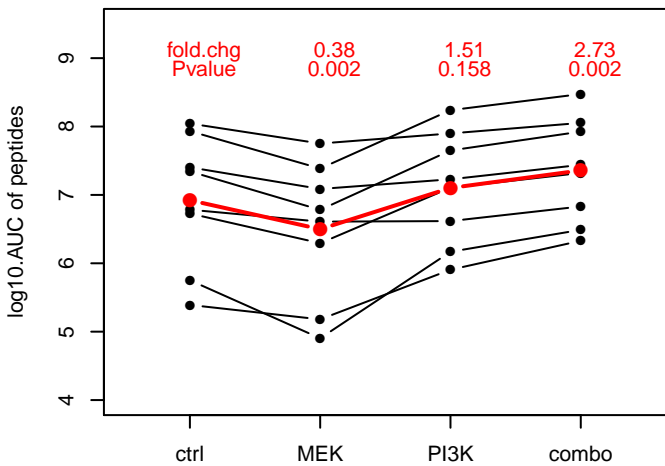

**EPS8\_HUMAN**

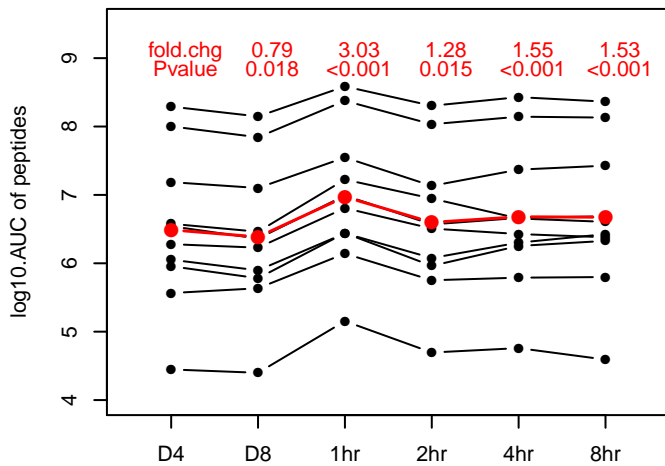

### ERC6L\_HUMAN

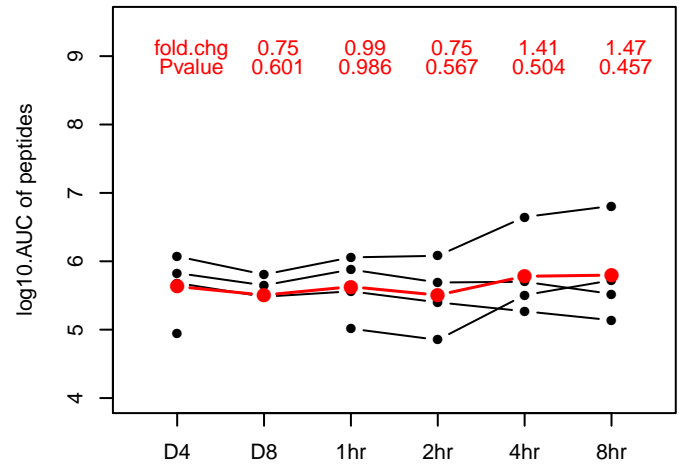

### ETV3\_HUMAN

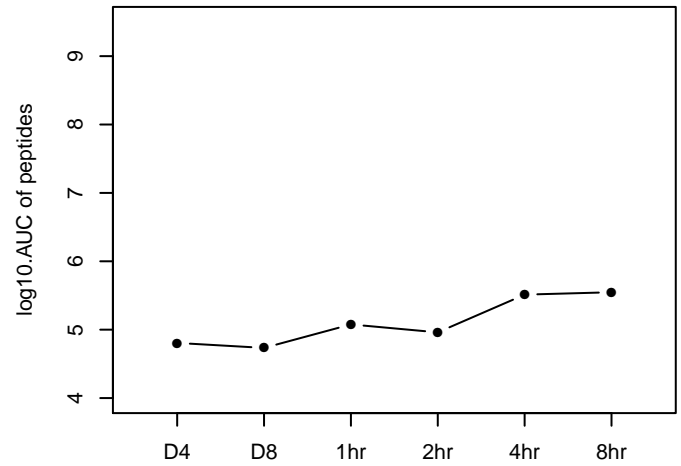

### EXOC2\_HUMAN

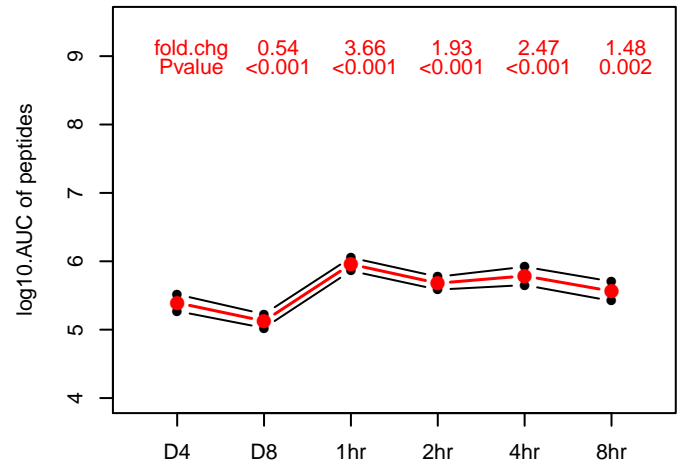

**F120A\_HUMAN**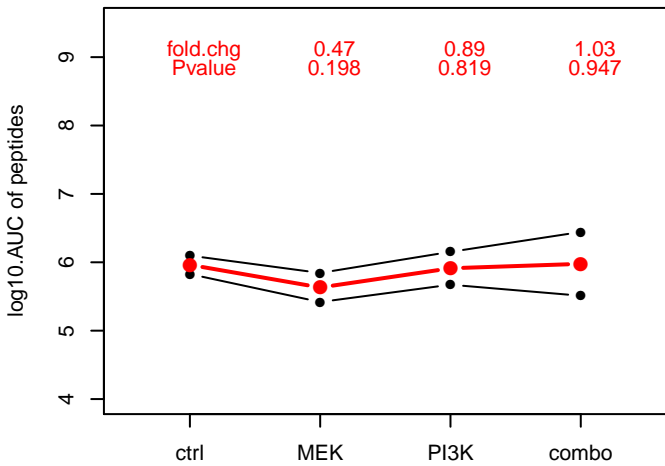**F120A\_HUMAN**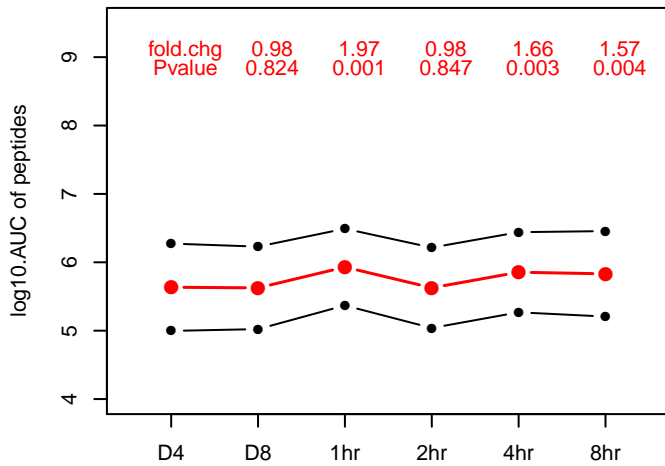**F136A\_HUMAN**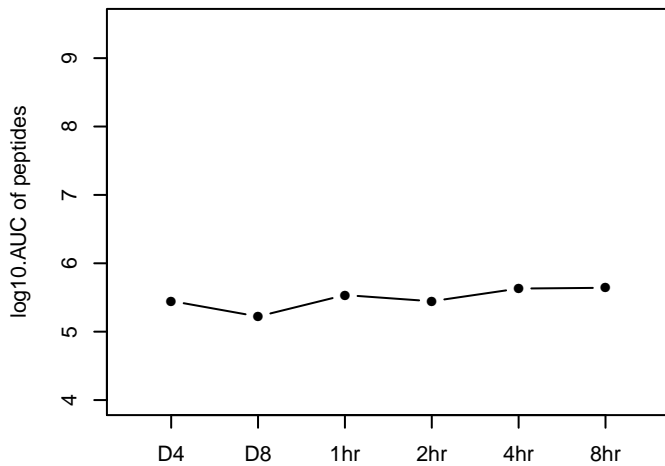**F1712\_HUMAN**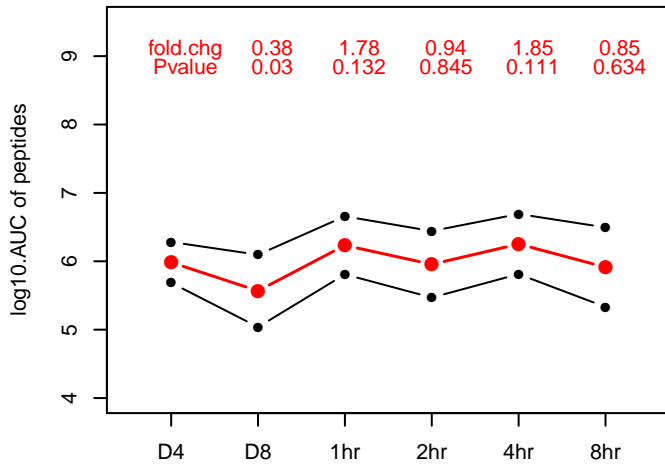

### F208A\_HUMAN

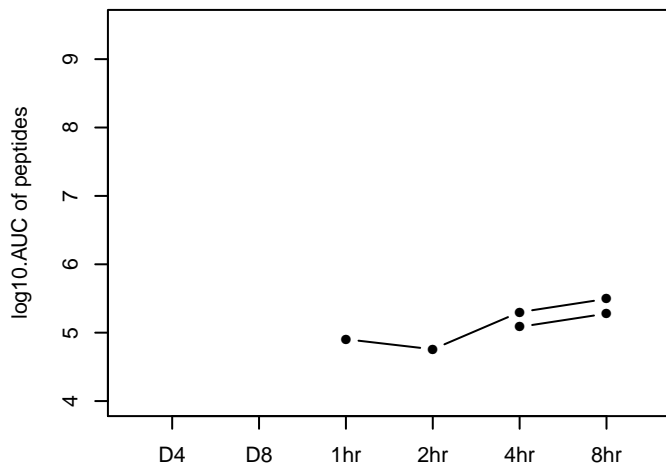

### F208B\_HUMAN

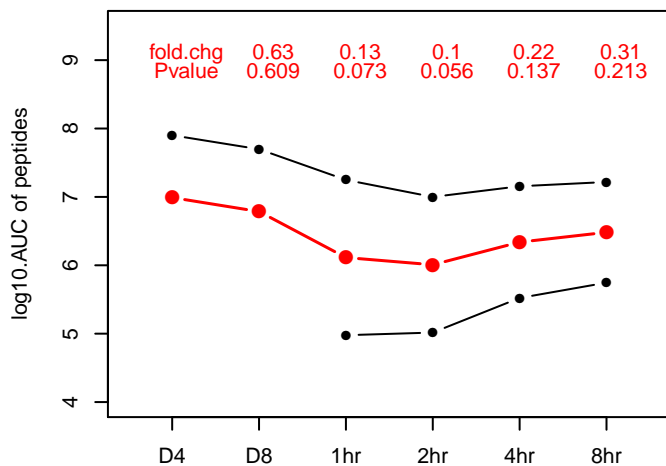

### F5GWH4\_HUMAN

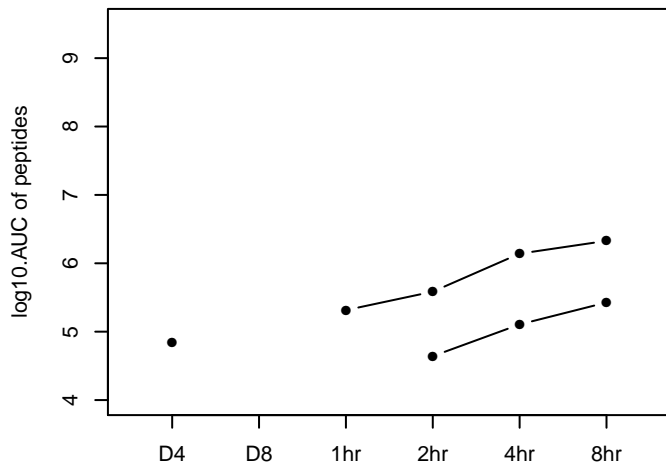



**F5GZS6\_HUMAN**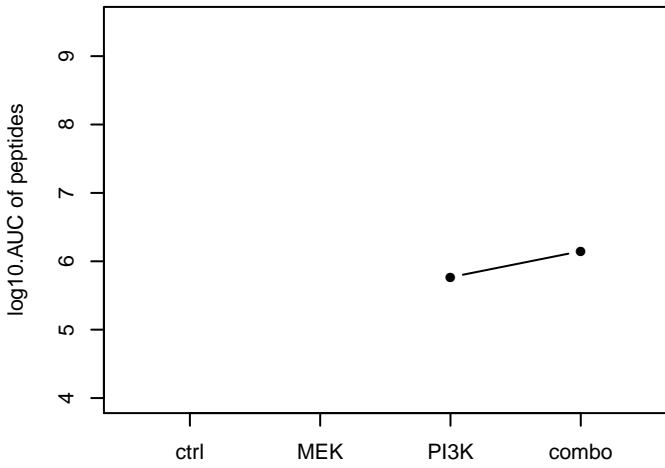**F5GZS6\_HUMAN**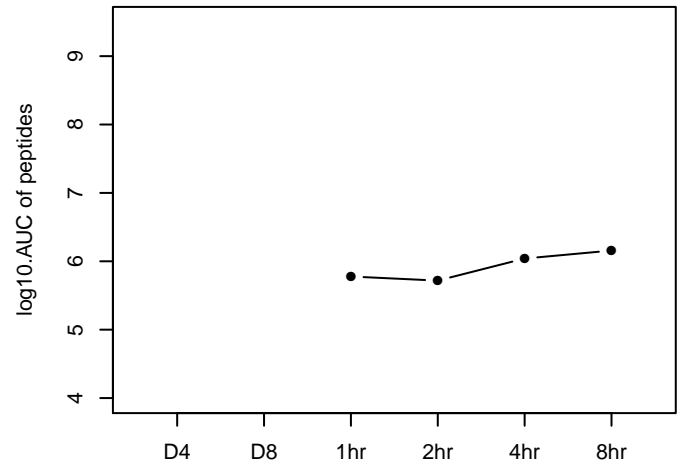**F91A1\_HUMAN**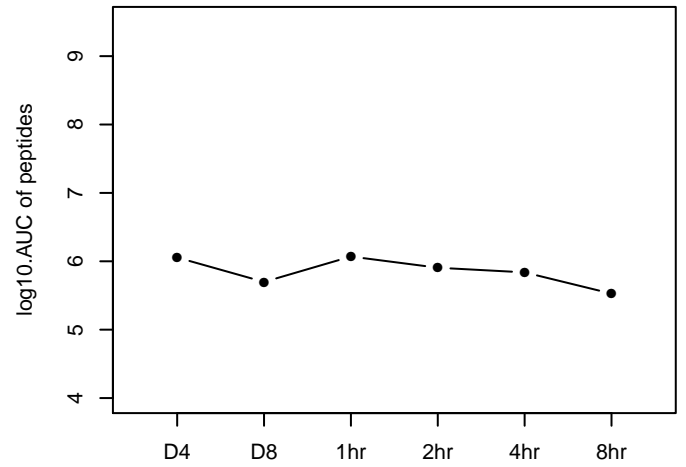**FAAA\_HUMAN**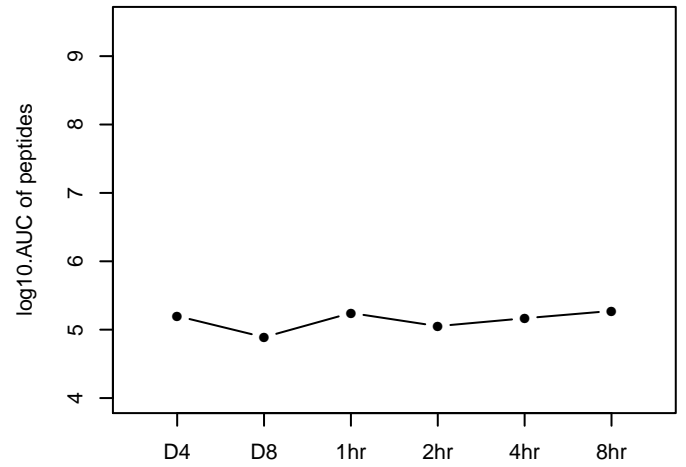

### FACD2\_HUMAN

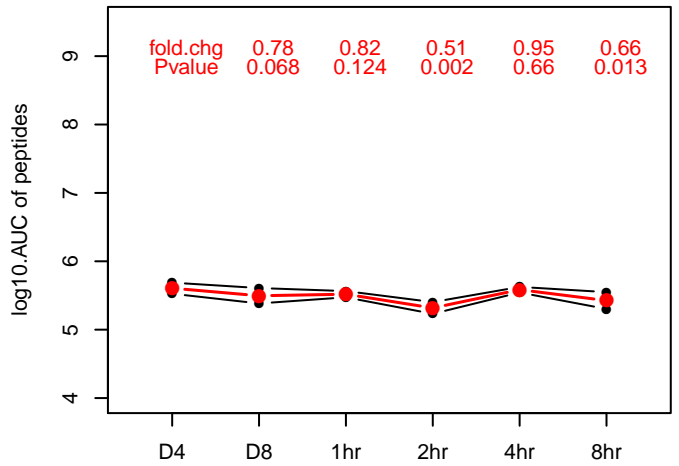

### FAH2A\_HUMAN

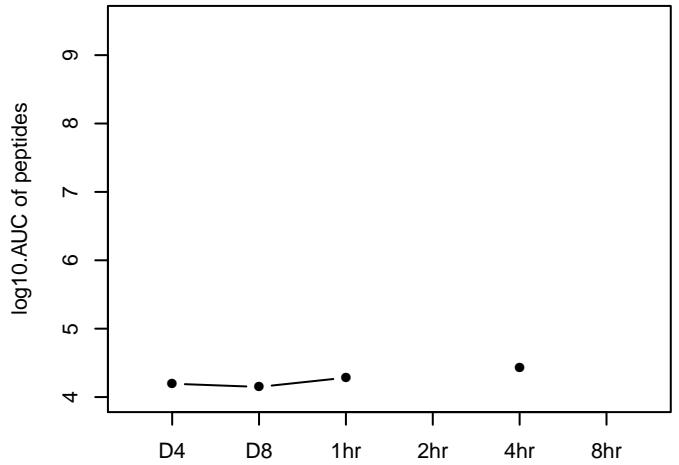

### FANCI\_HUMAN

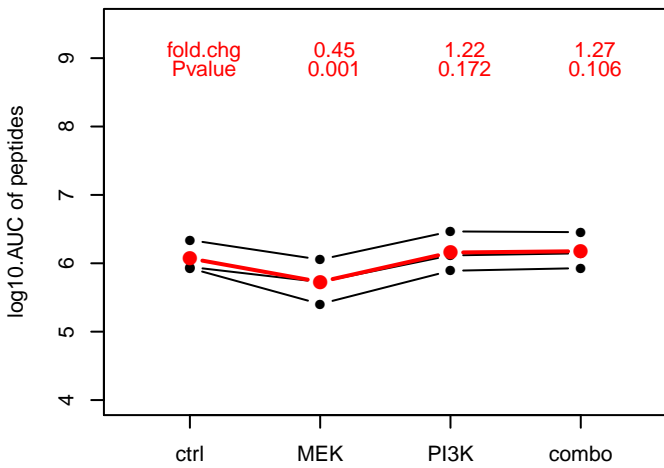

### FANCI\_HUMAN

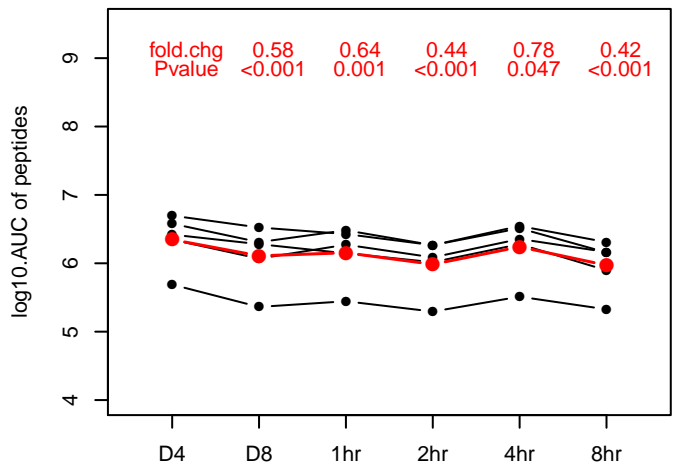

**FAS\_HUMAN**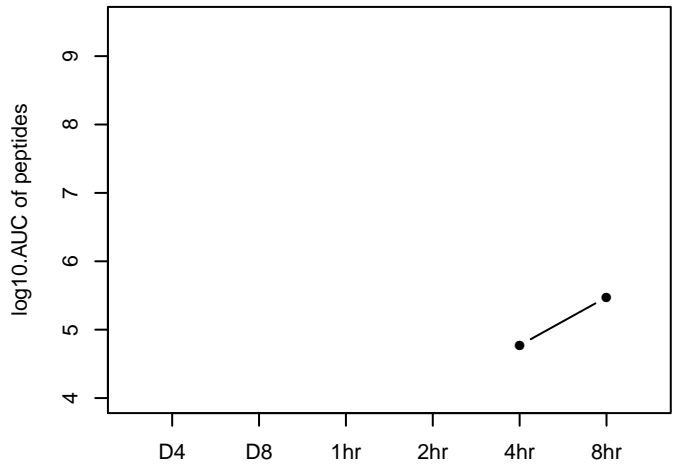**FKB15\_HUMAN**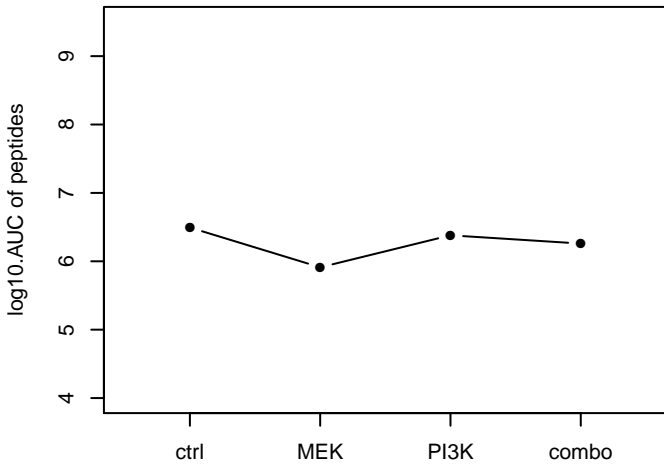**FKB15\_HUMAN**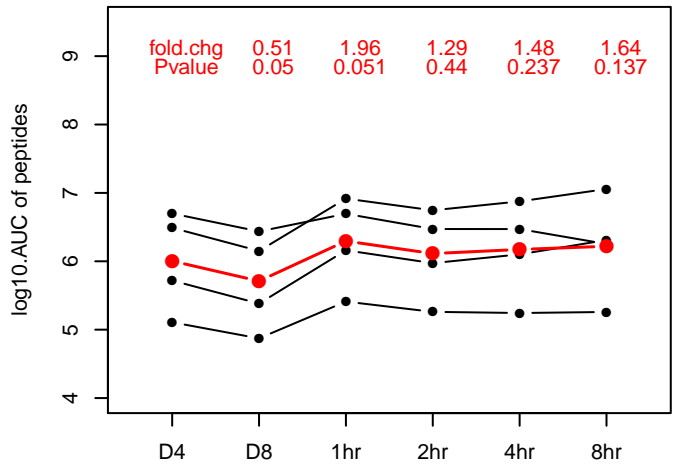**FKBP4\_HUMAN**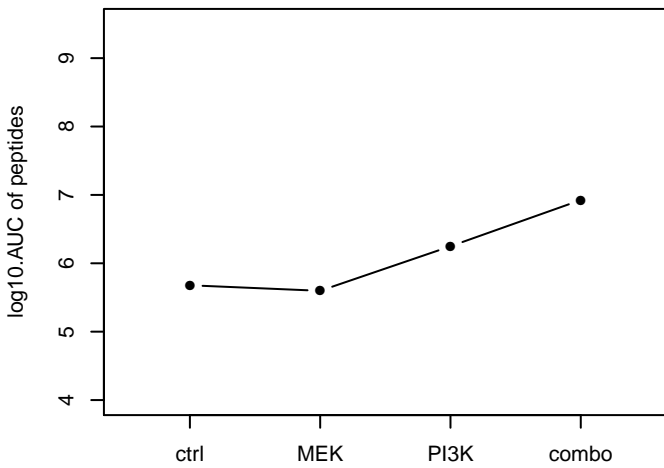**FKBP4\_HUMAN**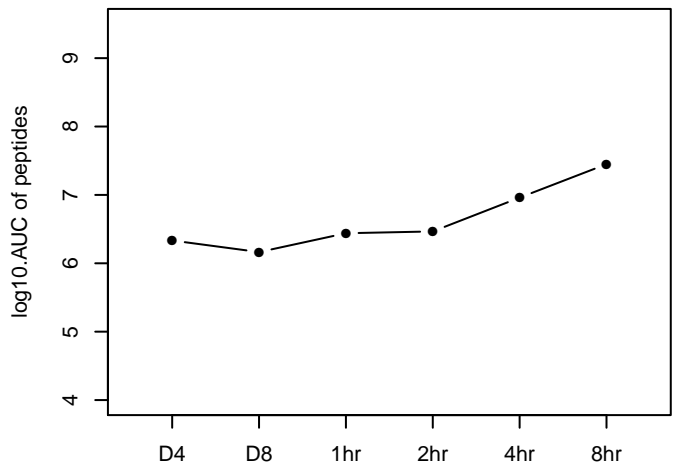

FKBP5\_HUMAN

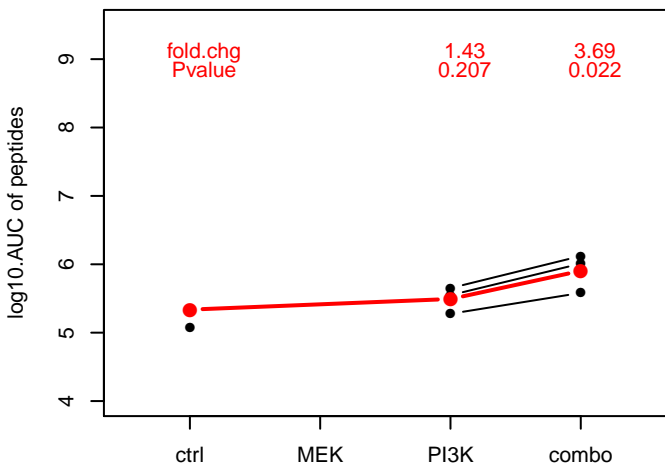

FKBP5\_HUMAN

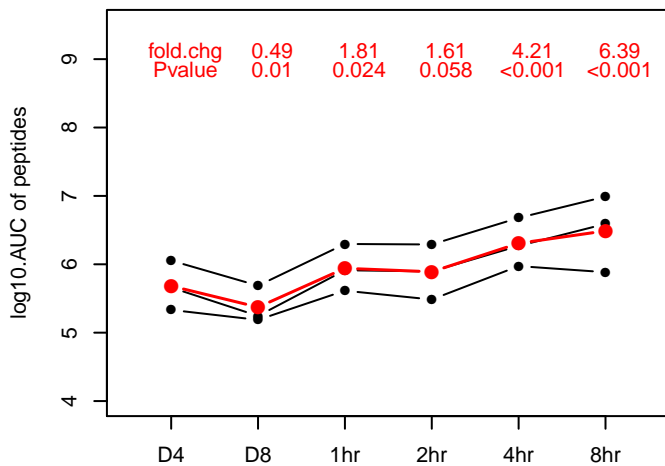

FL2D\_HUMAN

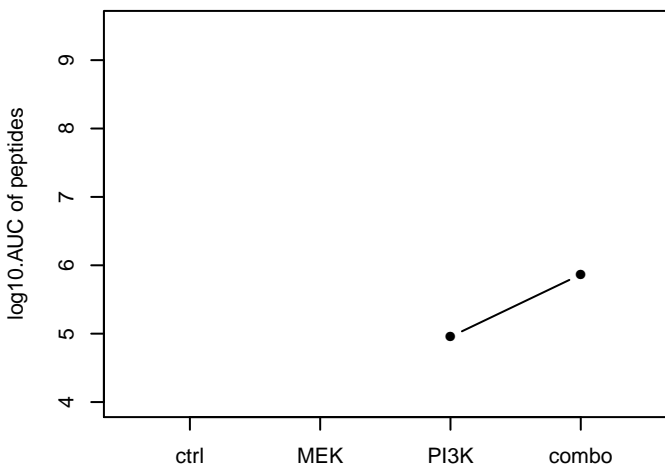

FL2D\_HUMAN

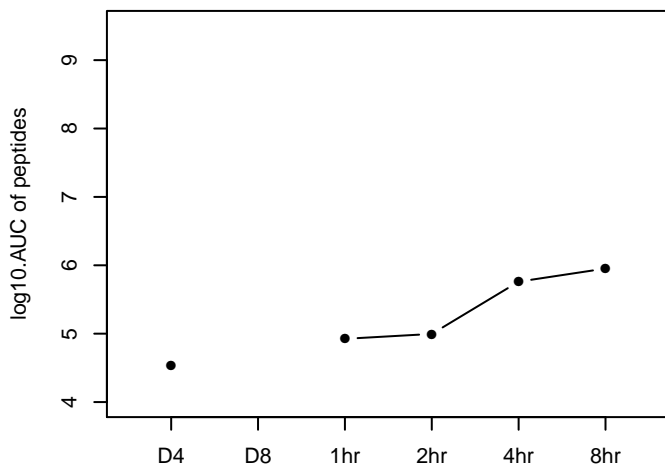

FLNA\_HUMAN

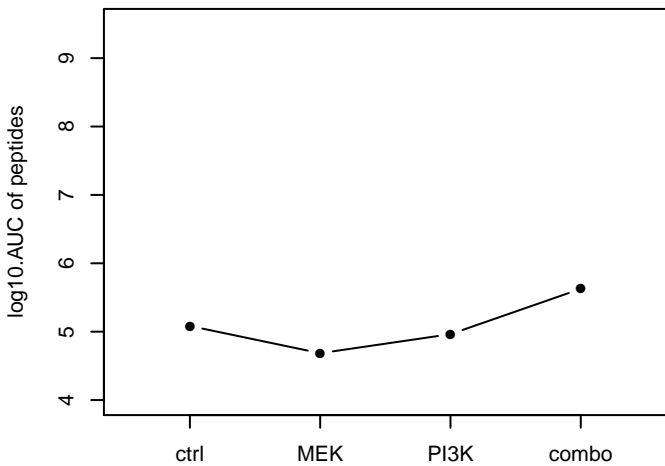

FLNA\_HUMAN

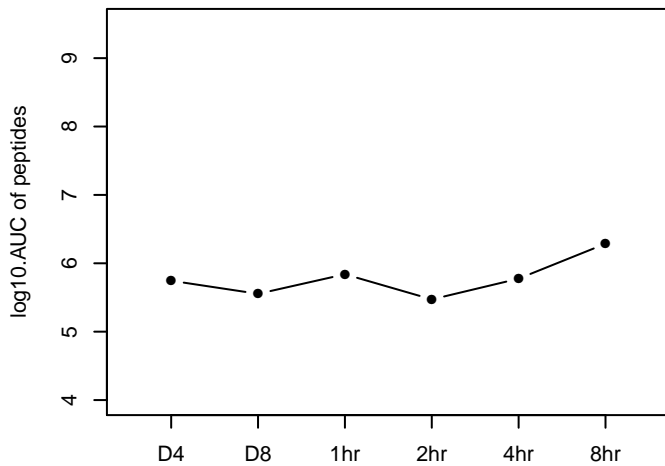

**FLNB\_HUMAN**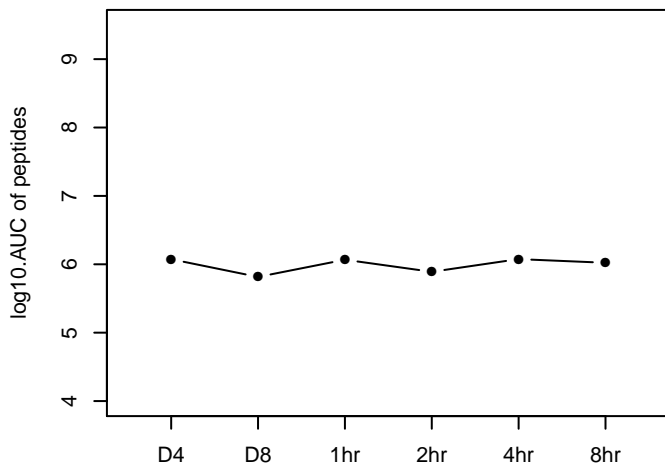**FOXO3\_HUMAN**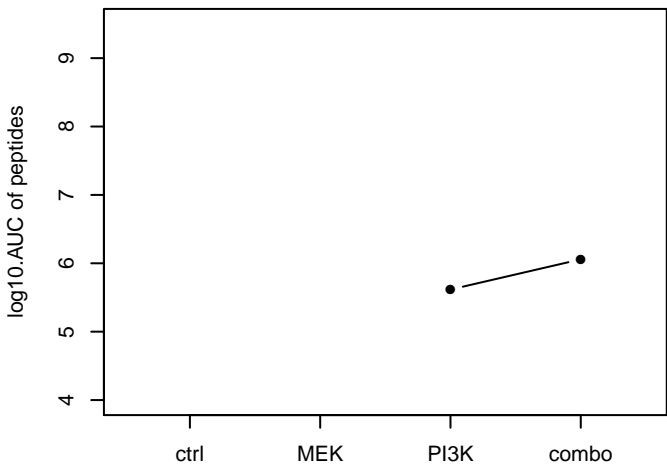**FOXO3\_HUMAN**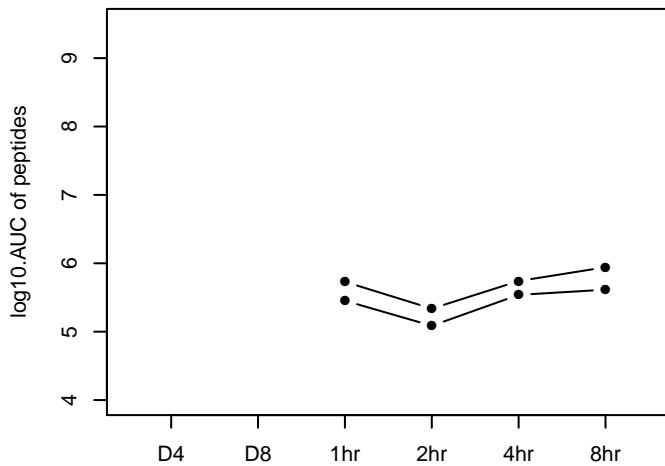**FRM4A\_HUMAN**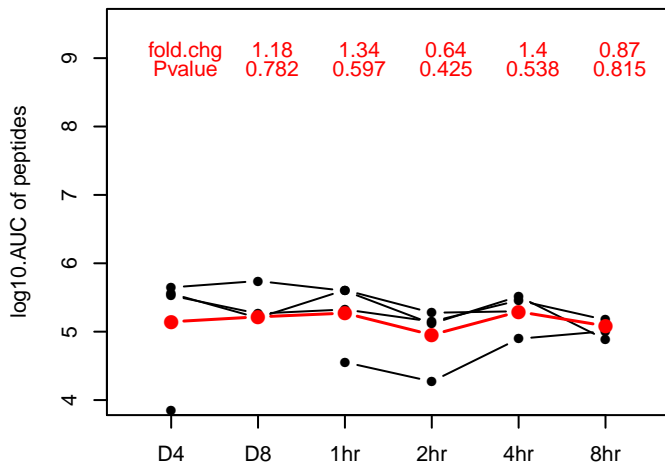

**FUBP2\_HUMAN**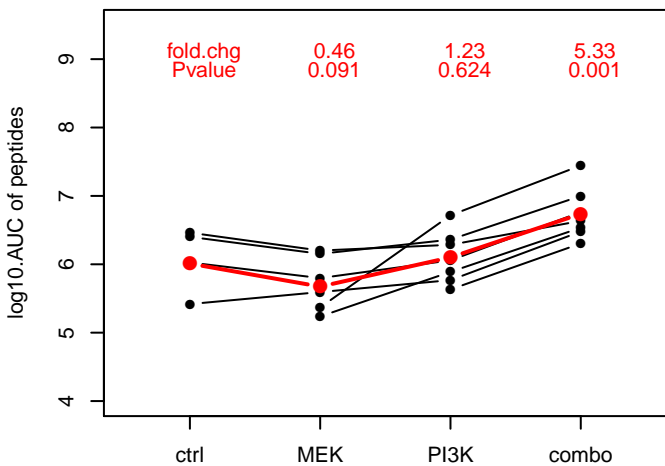**FUBP2\_HUMAN**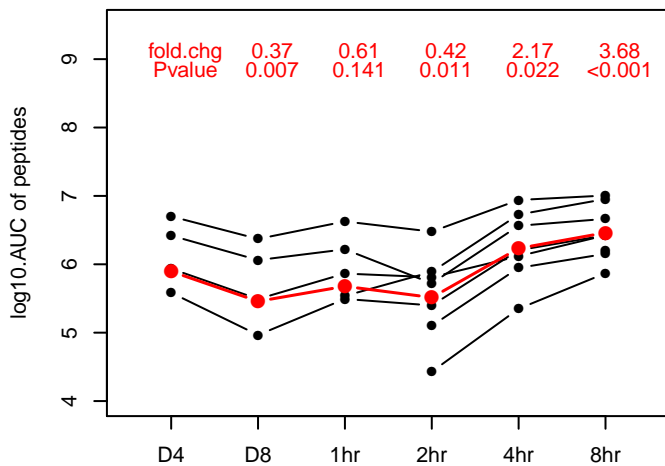**FUBP3\_HUMAN**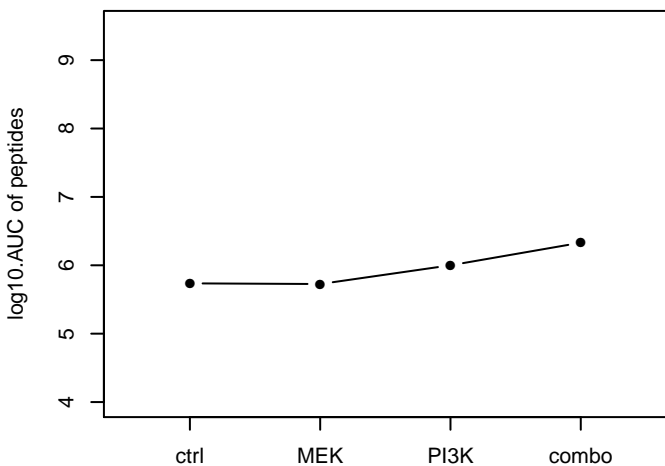**FUBP3\_HUMAN**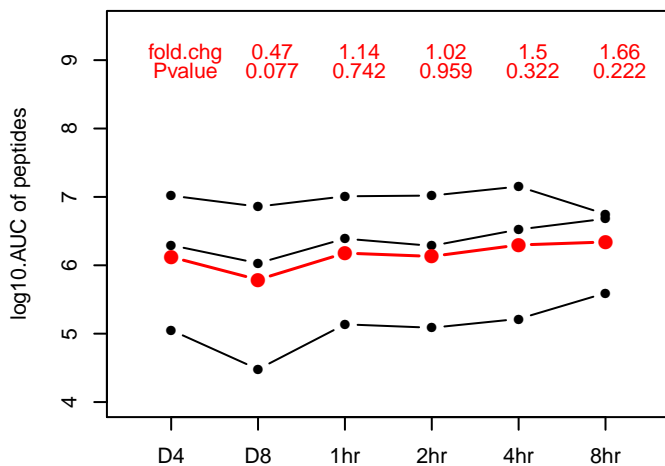**FXR1\_HUMAN**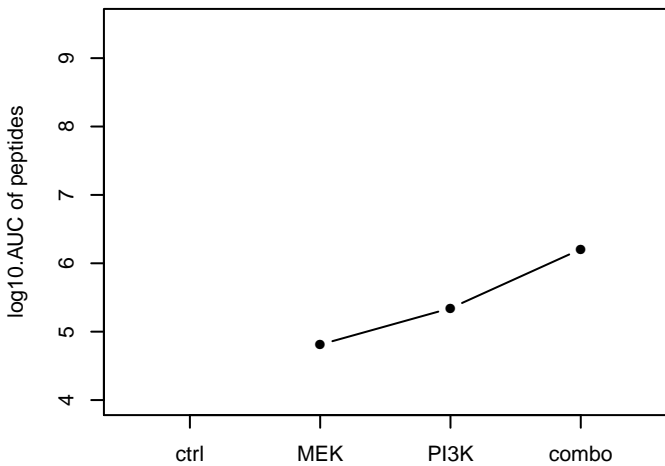**FXR1\_HUMAN**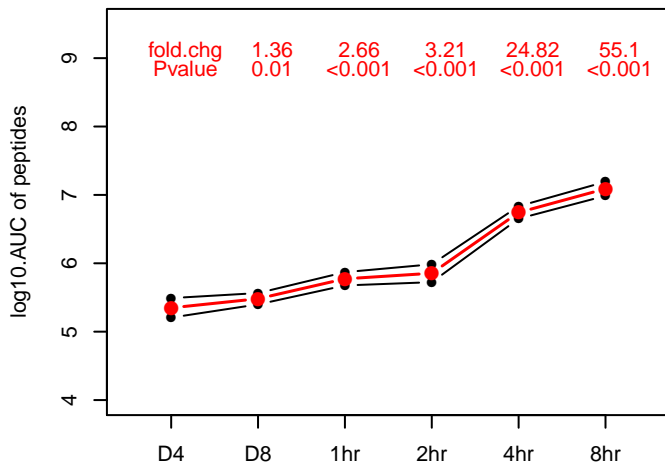

**G3BP1\_HUMAN**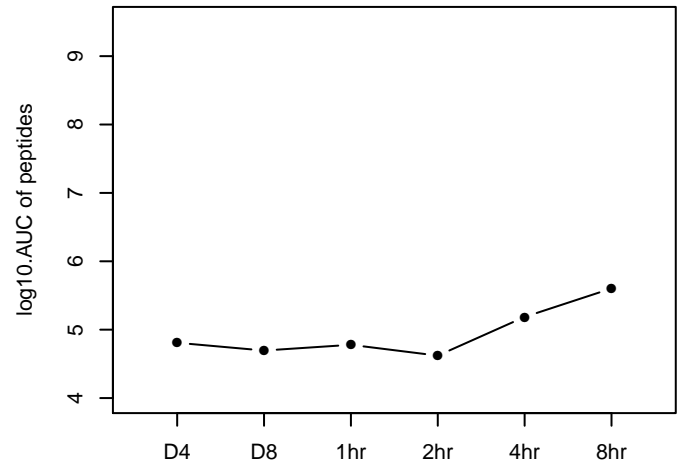**G3P\_HUMAN**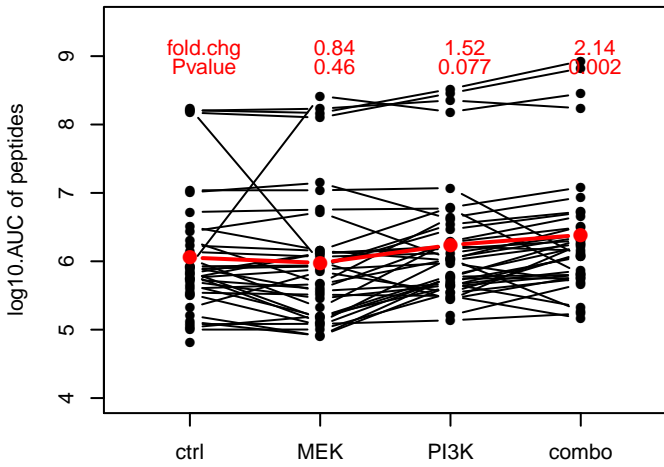**G3P\_HUMAN**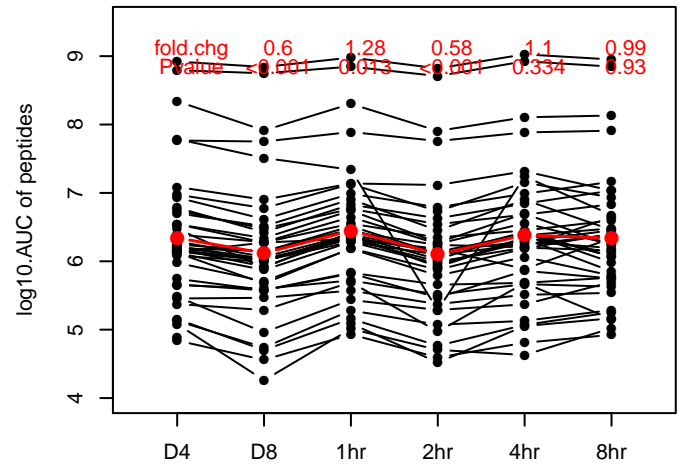**G6PD\_HUMAN**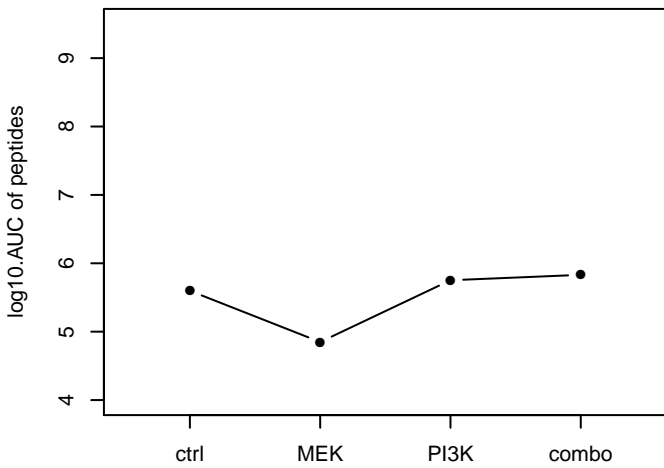**G6PD\_HUMAN**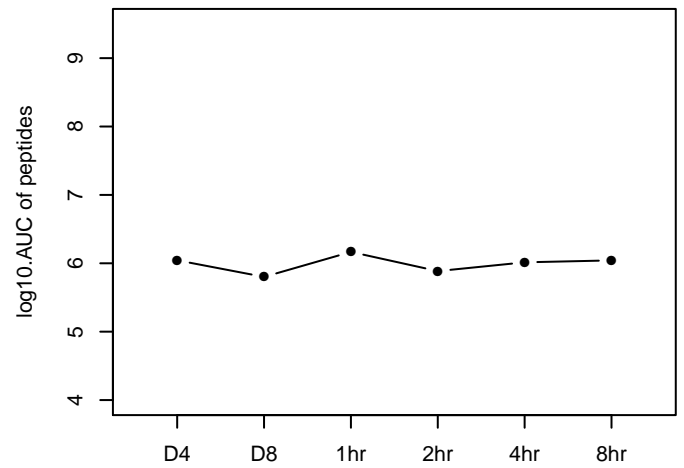

### G6PI\_HUMAN

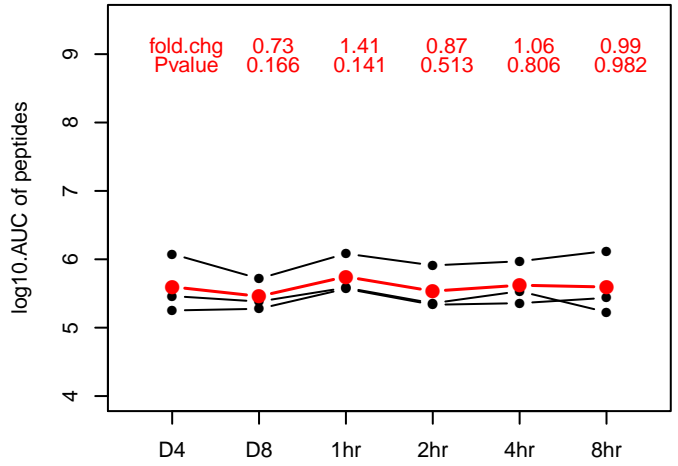

### GAGB1\_HUMAN

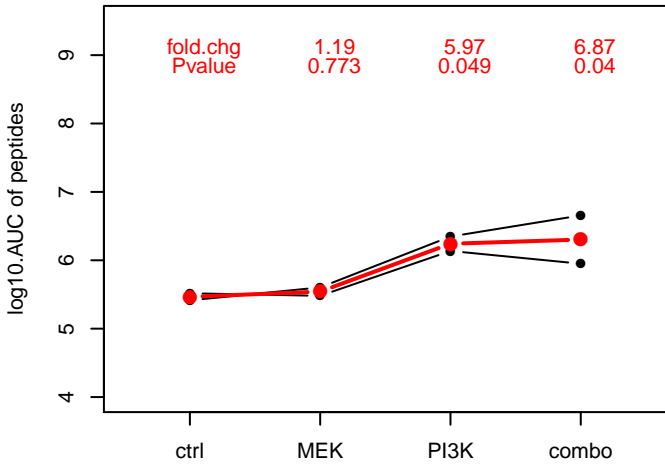

### GAGB1\_HUMAN

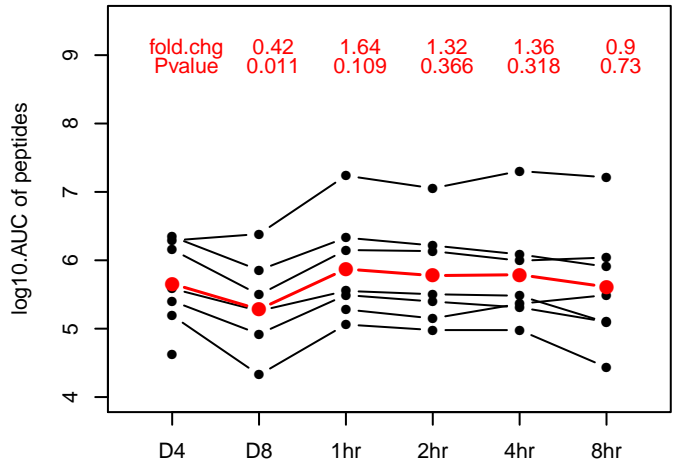

### GAPD1\_HUMAN

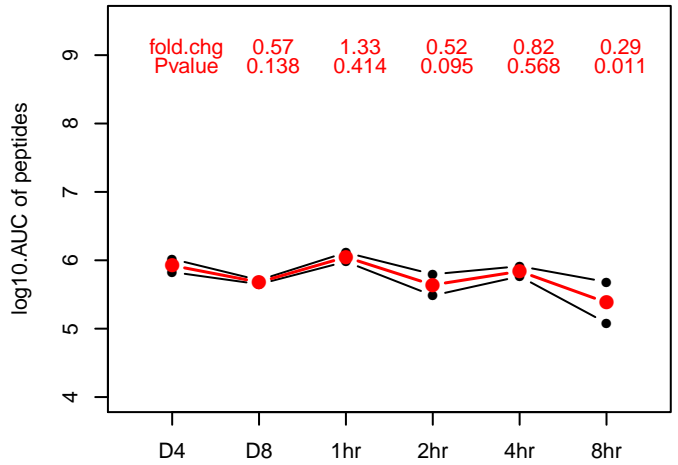



### GBB1\_HUMAN

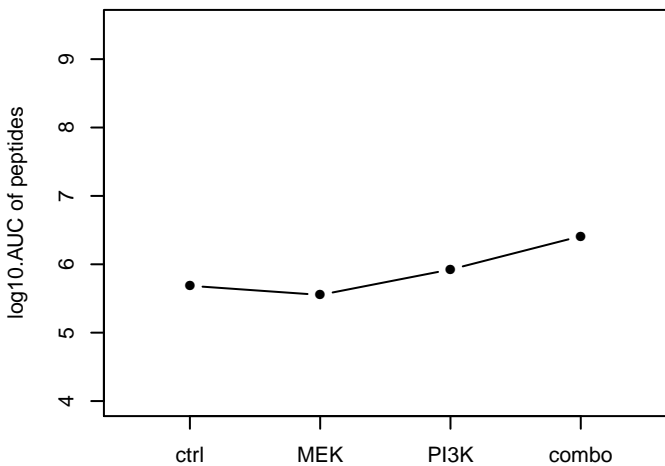

### GBB2\_HUMAN

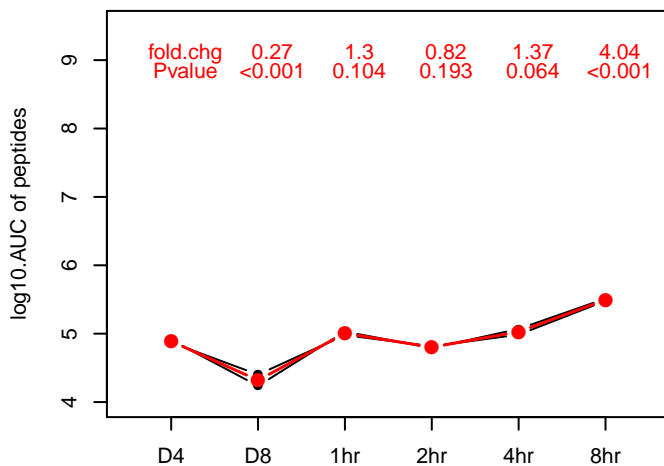

### GBF1\_HUMAN

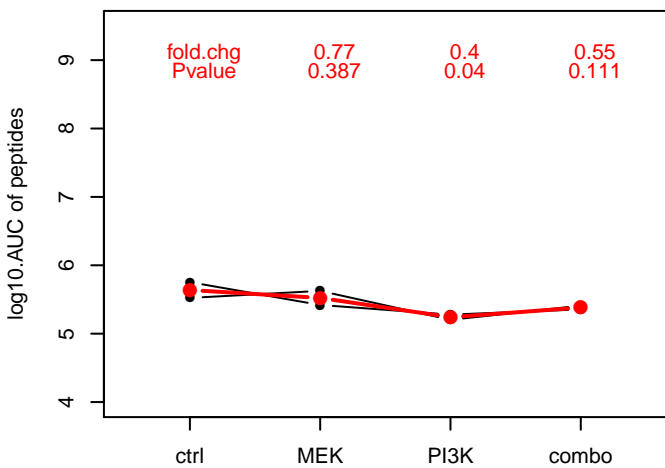

### GBF1\_HUMAN

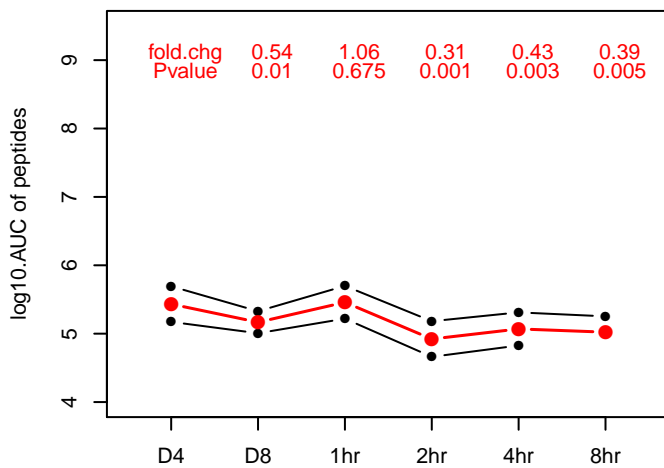

**GCP3\_HUMAN**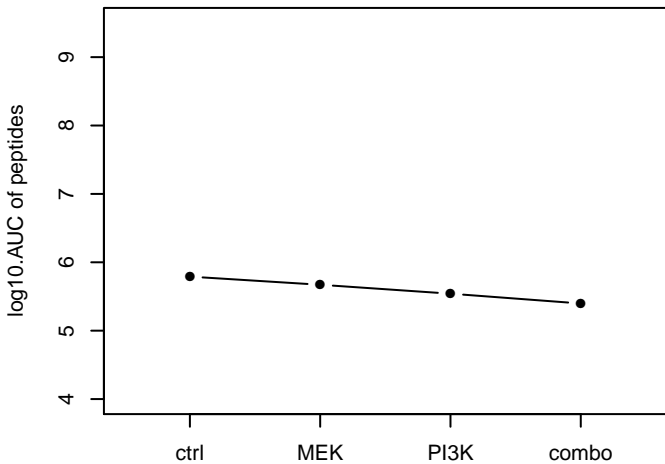**GCP3\_HUMAN**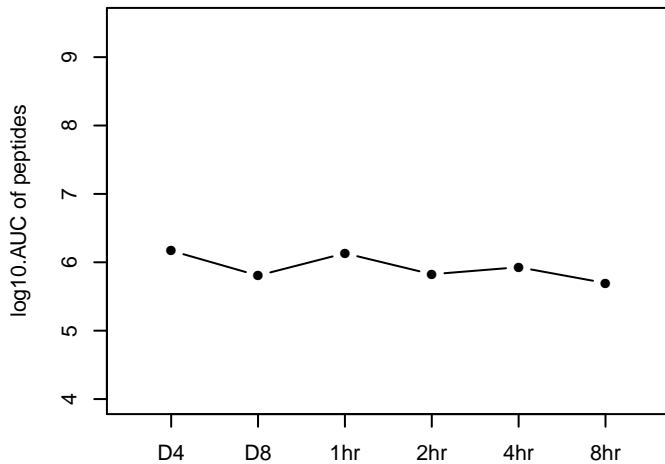**GDAP1\_HUMAN**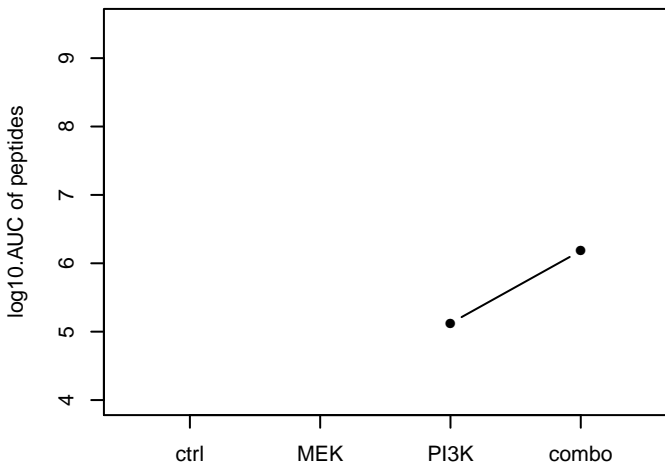**GDAP1\_HUMAN**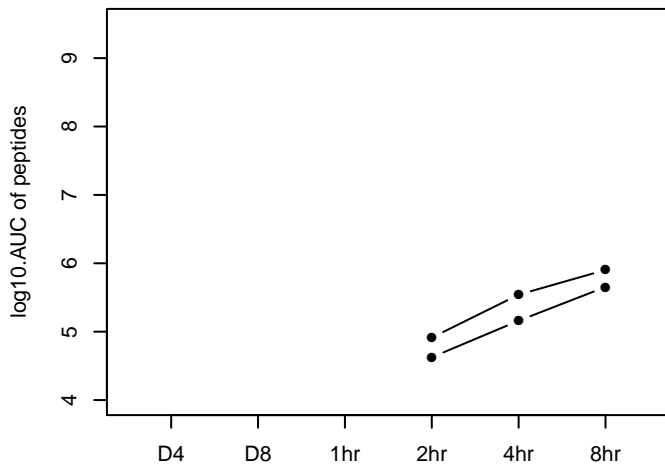**GEMI\_HUMAN**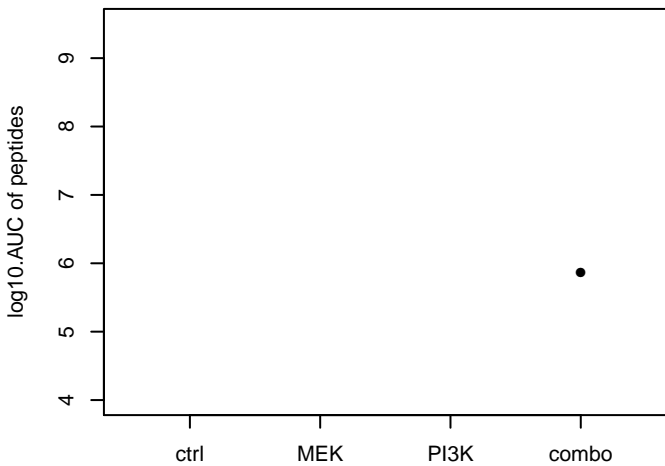**GEMI\_HUMAN**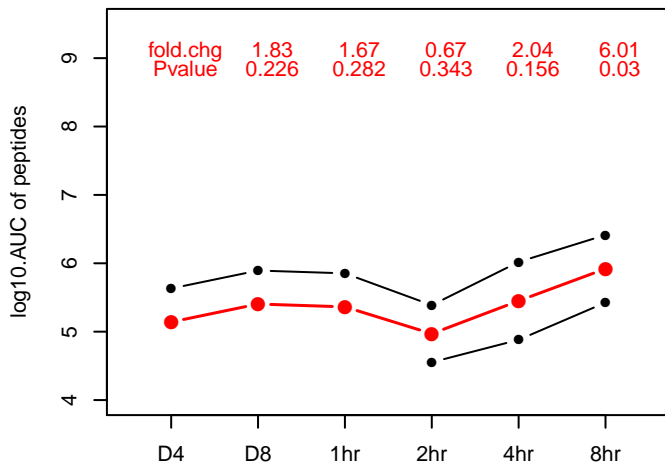

### GEMI4\_HUMAN

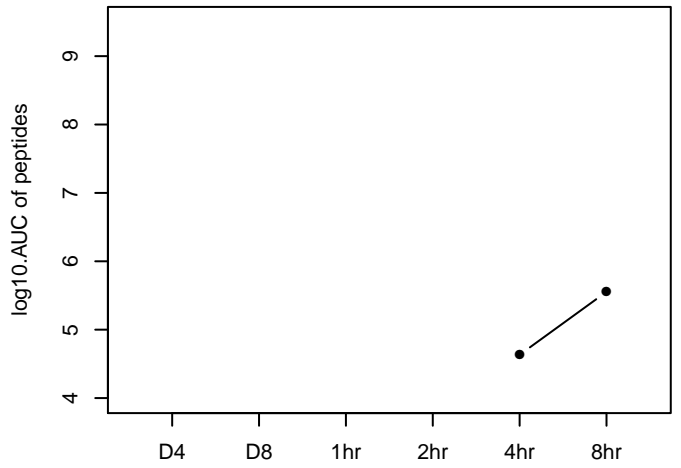

### GIPC1\_HUMAN

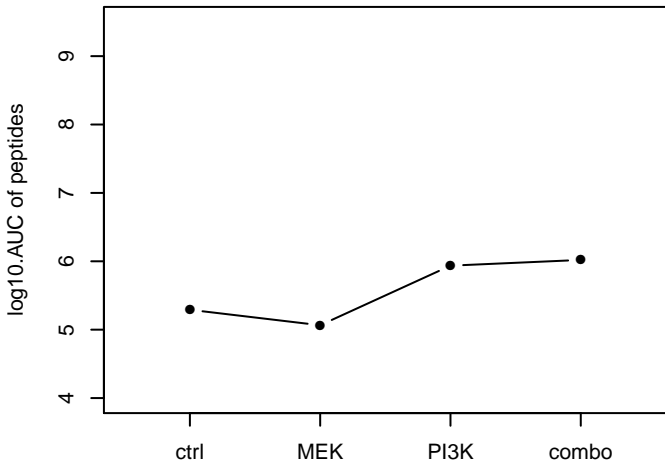

### GNL1\_HUMAN

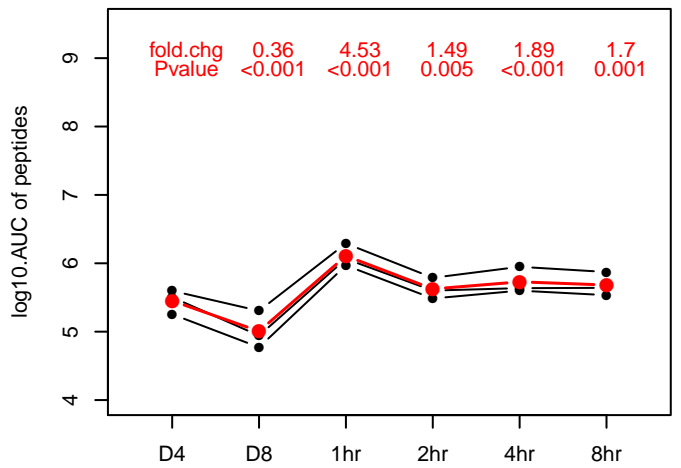

### GOGA3\_HUMAN

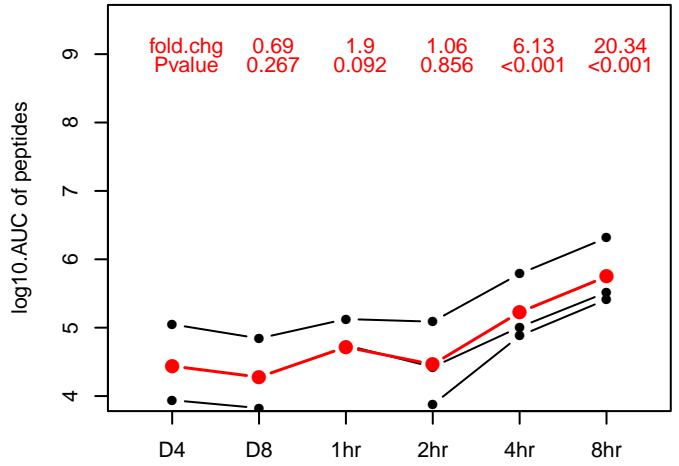

### GPTC8\_HUMAN

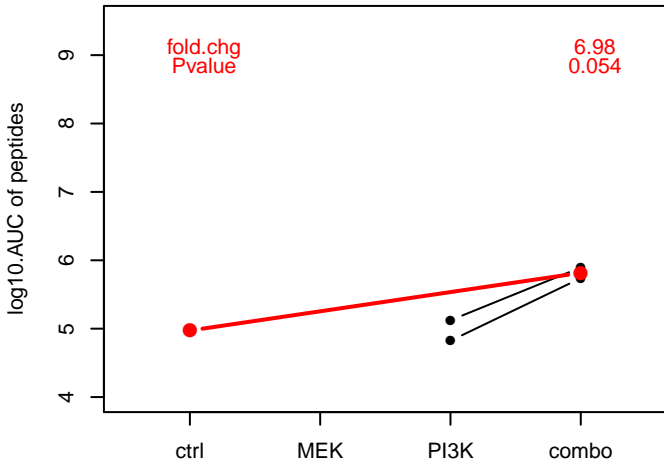

### GPTC8\_HUMAN

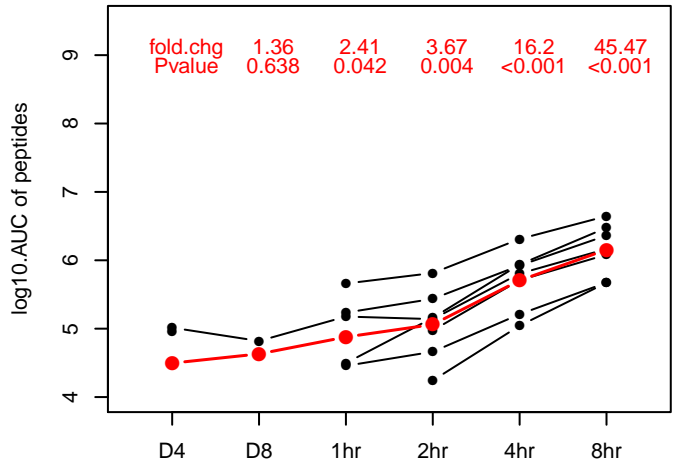

### GRAP1\_HUMAN

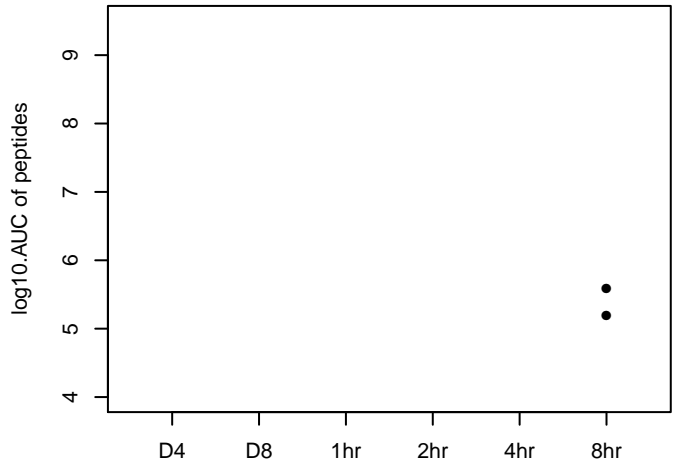

**GRDN\_HUMAN**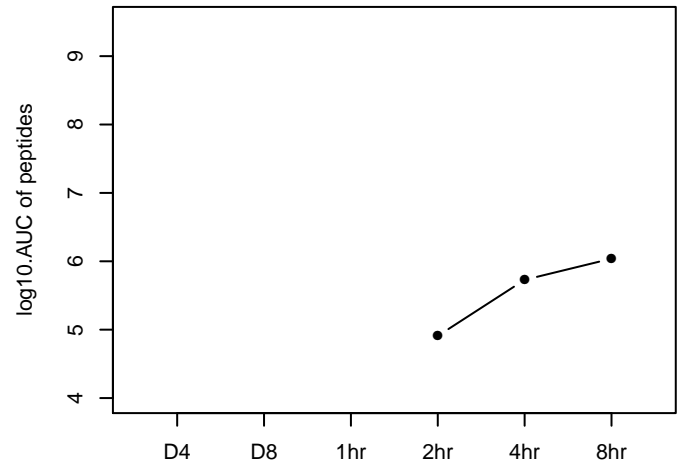**GRL1A\_HUMAN**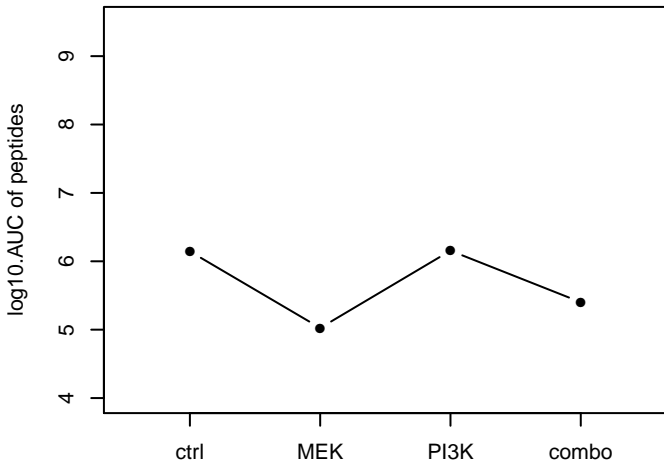**GRL1A\_HUMAN**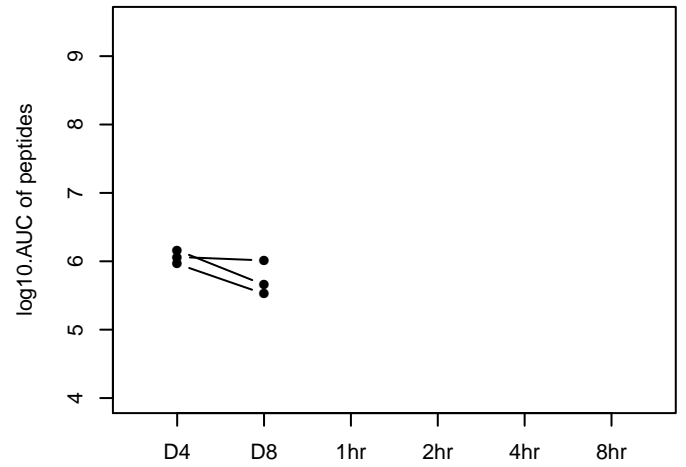**GRM1A\_HUMAN**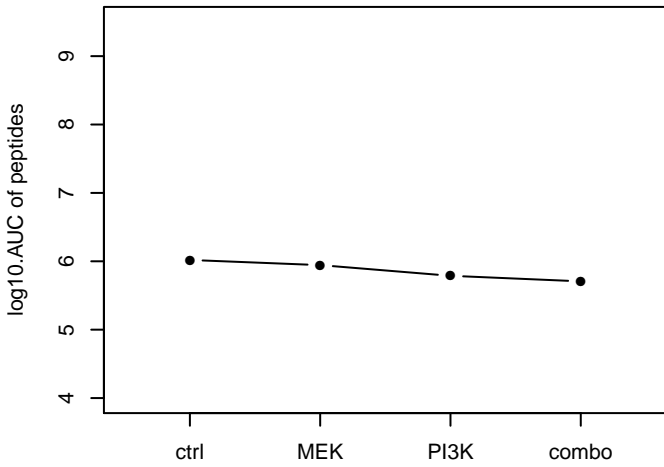**GRM1A\_HUMAN**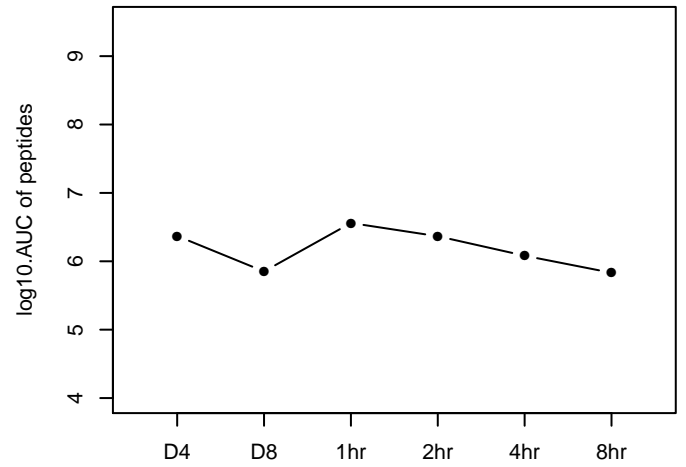

**GRP75\_HUMAN**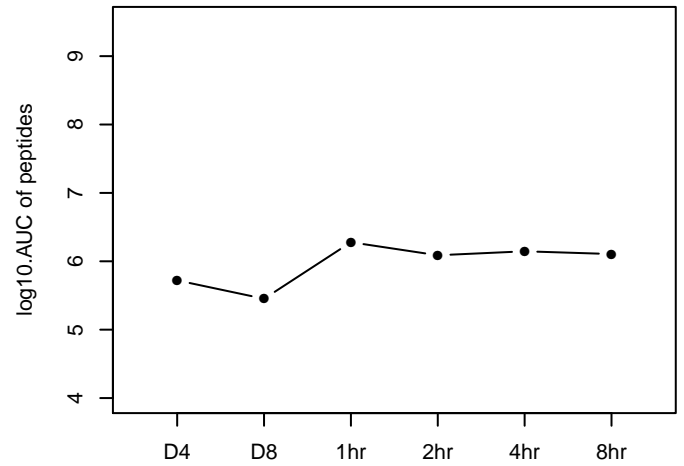**GTF2I\_HUMAN**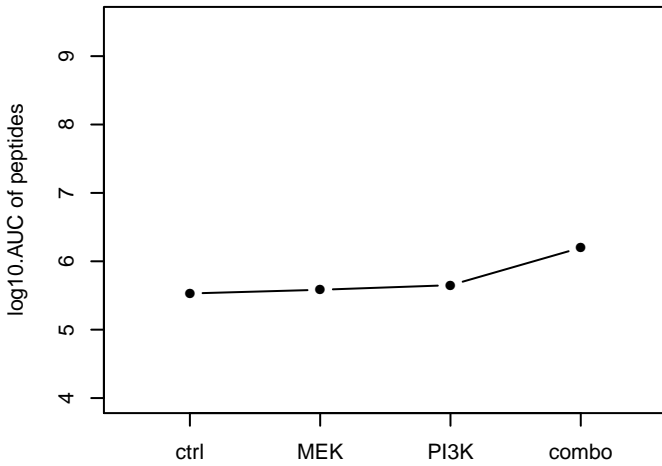**GTF2I\_HUMAN**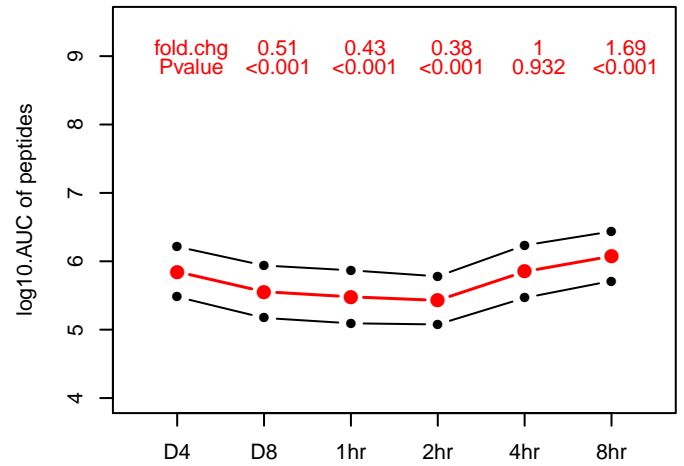**GTR1\_HUMAN**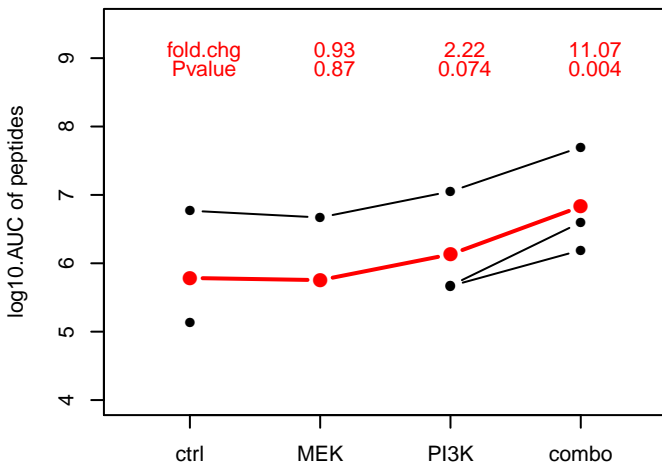**GTR1\_HUMAN**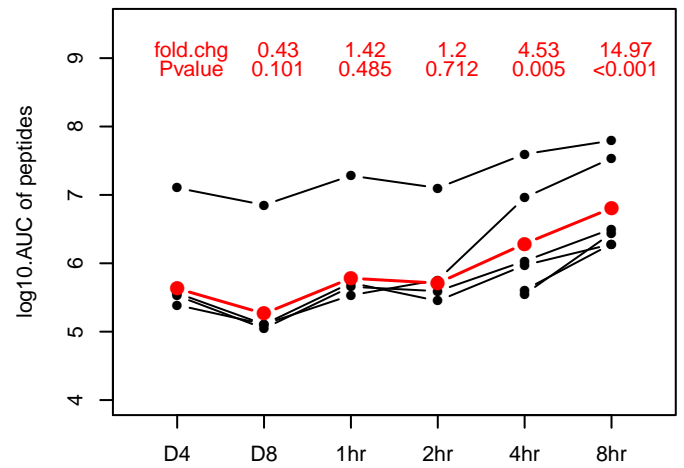

**GTR14\_HUMAN**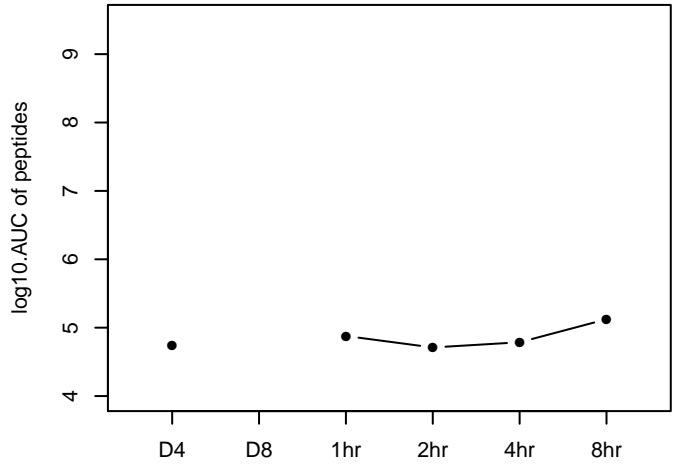**H2AX\_HUMAN**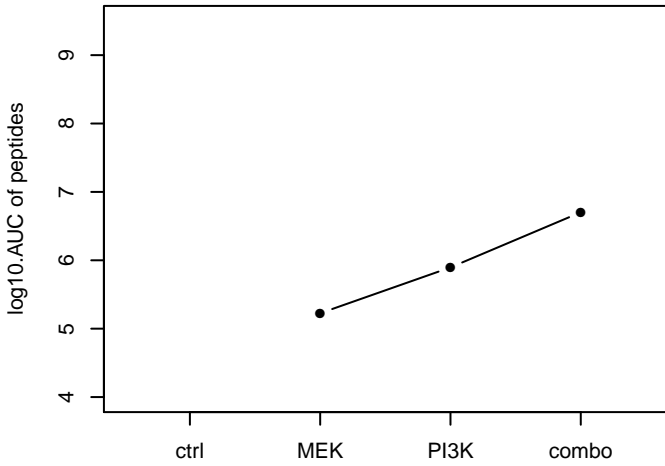**H2AX\_HUMAN**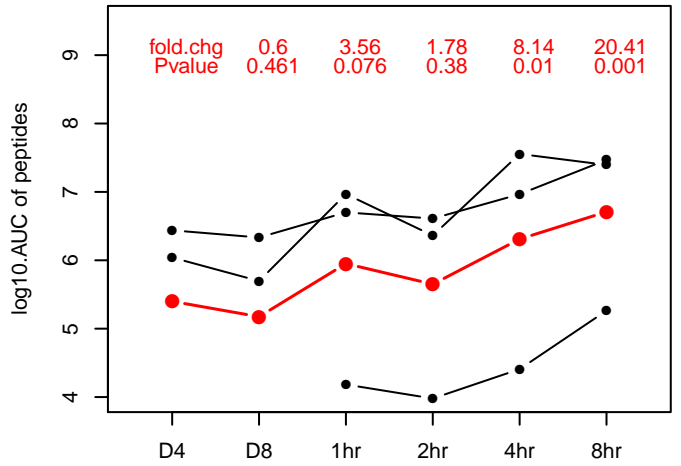**H90B3\_HUMAN**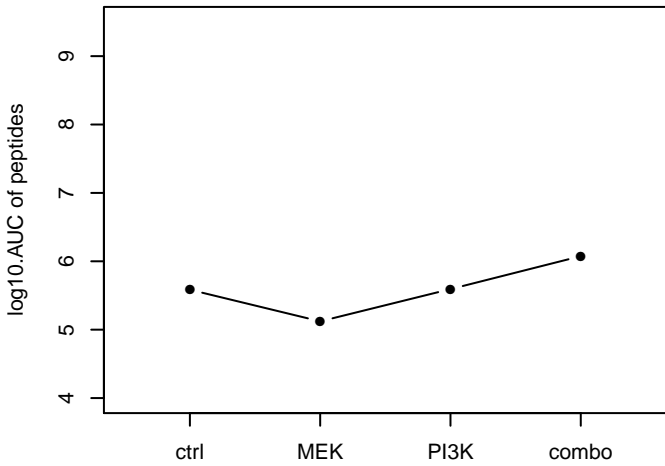**H90B3\_HUMAN**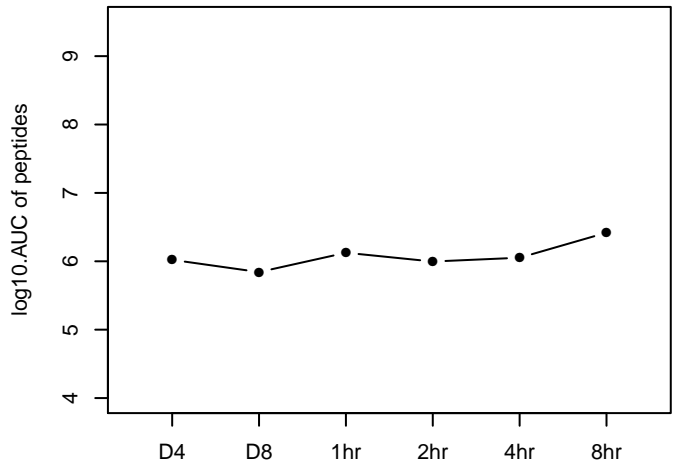

### HAP28\_HUMAN

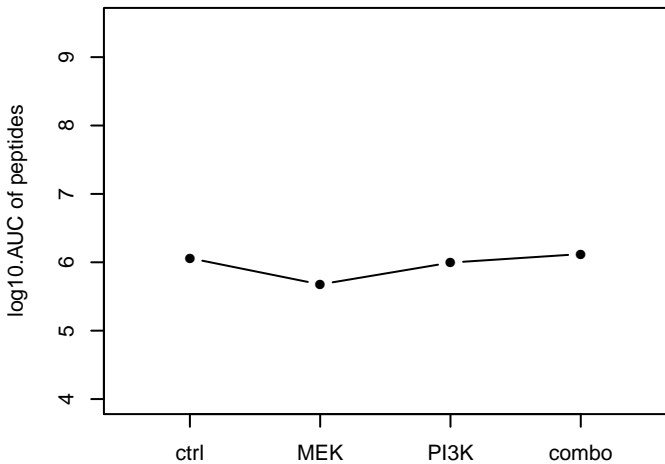

### HAP28\_HUMAN

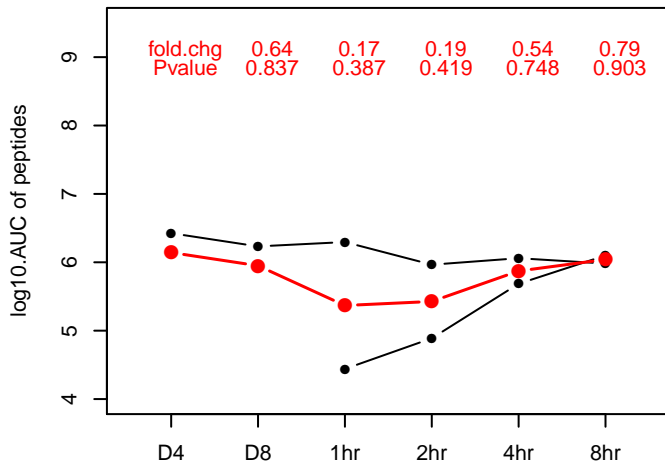

### HBB\_HUMAN

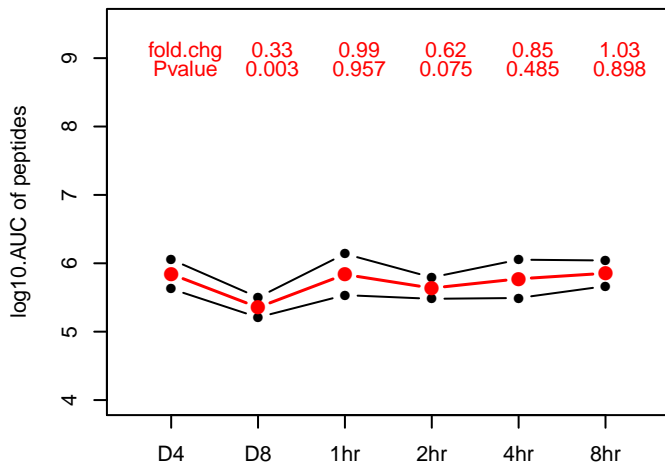

### HCFC1\_HUMAN

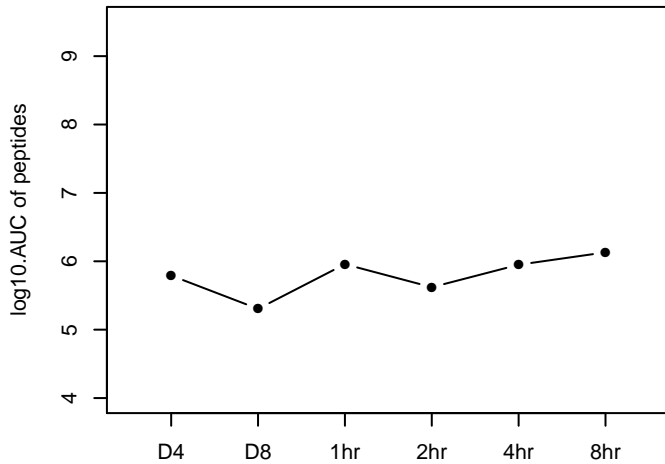



**HECD1\_HUMAN**

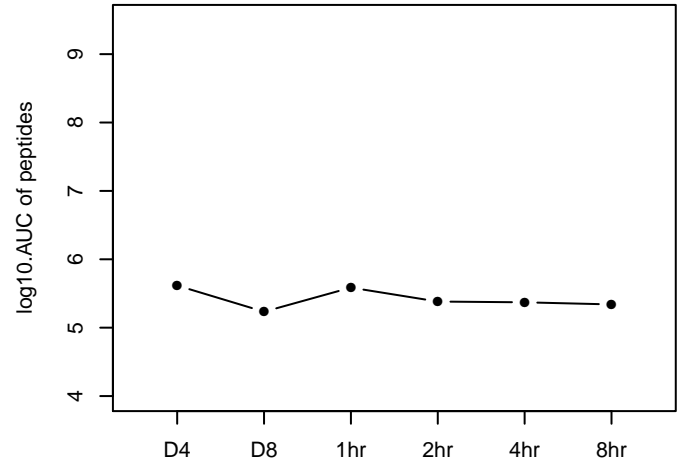

**HERC2\_HUMAN**

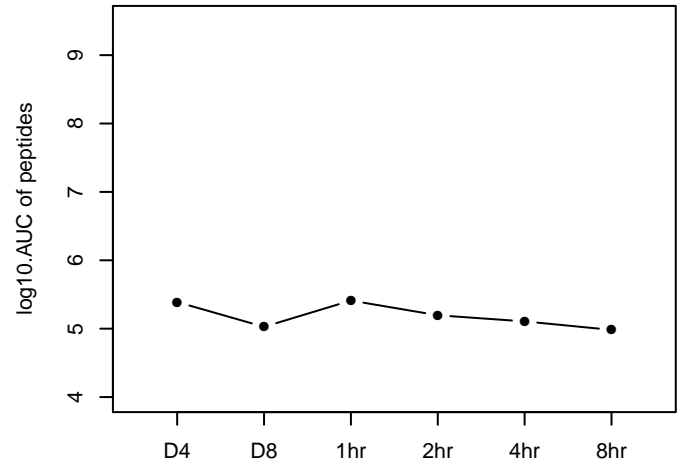

**HEXI1\_HUMAN**

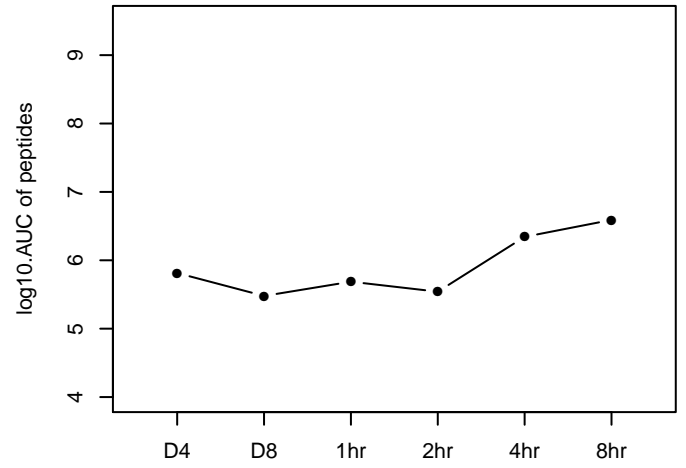

**HIN1L\_HUMAN**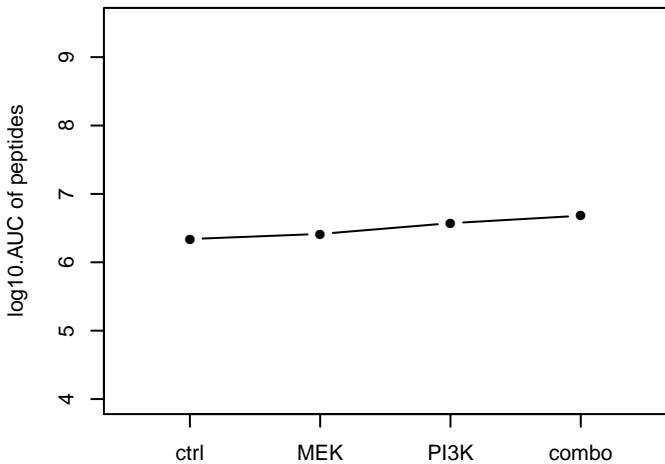**HIN1L\_HUMAN**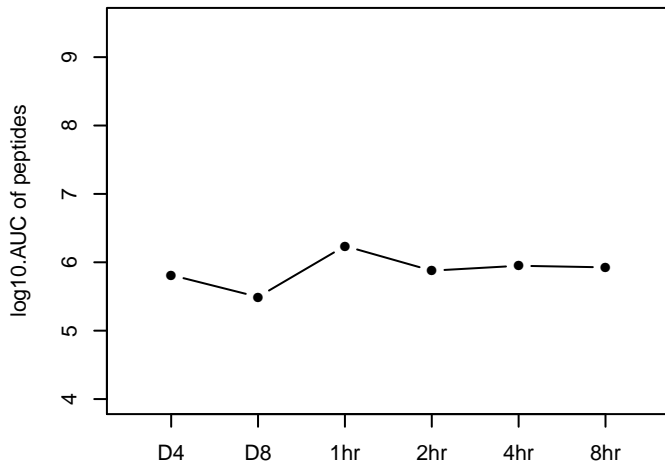**HMGA1\_HUMAN**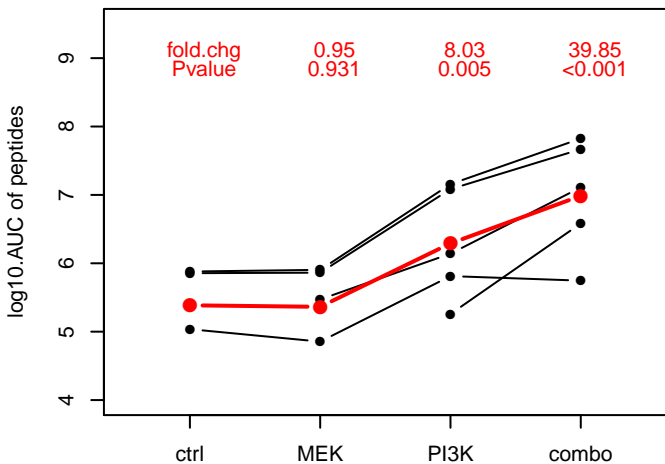**HMGA1\_HUMAN**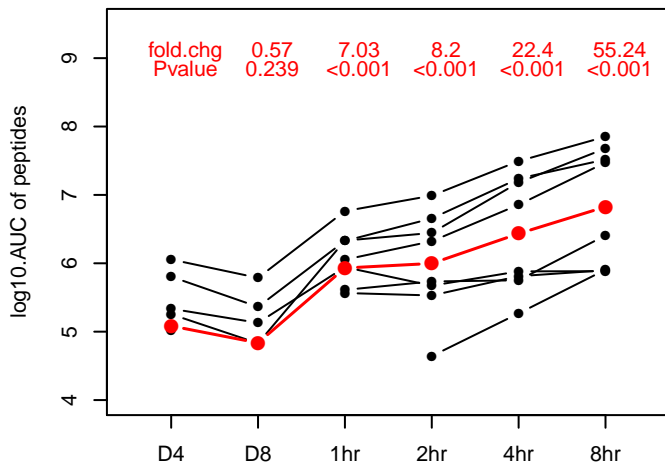**HMGN4\_HUMAN**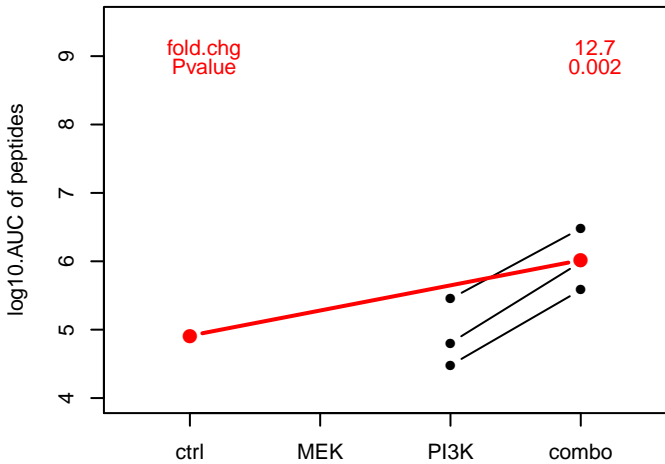**HMGN4\_HUMAN**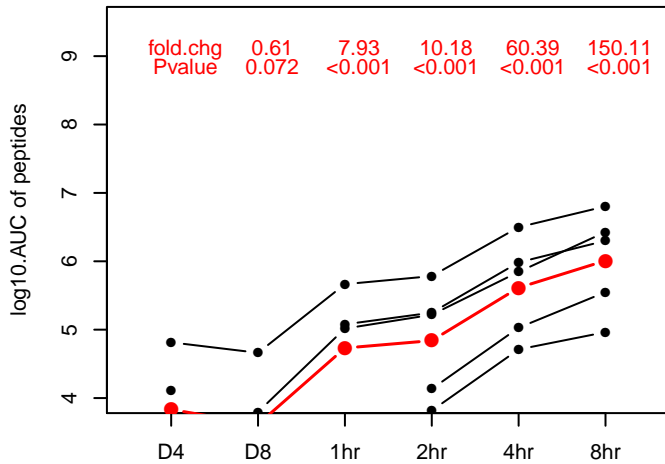

**HNRLI\_HUMAN**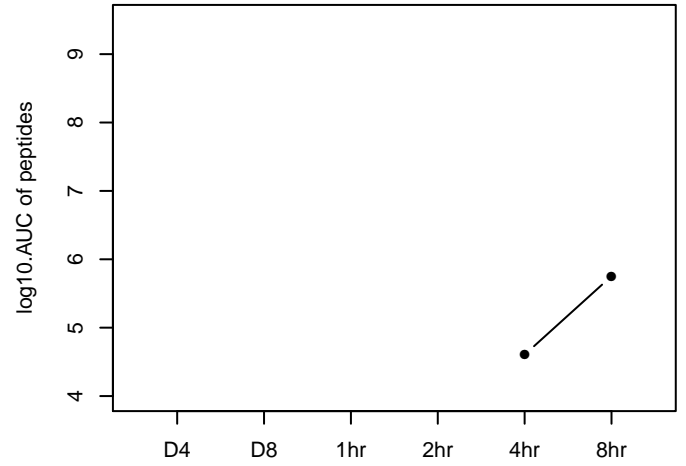**HNRPF\_HUMAN**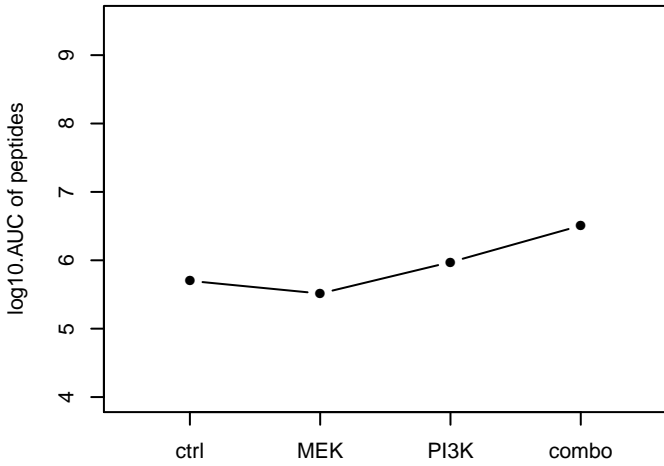**HNRPF\_HUMAN**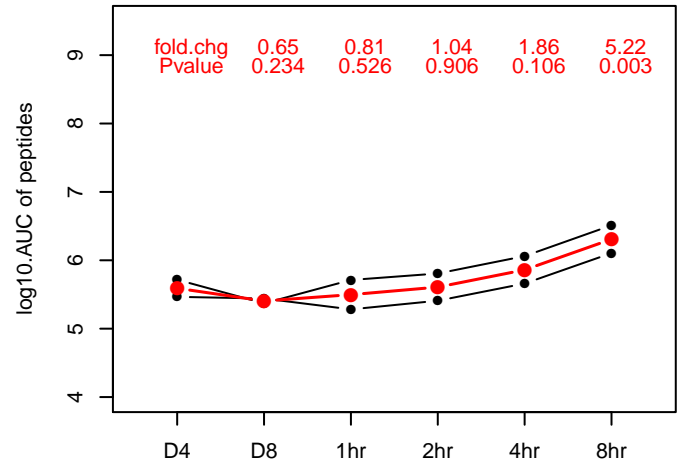**HNRPK\_HUMAN**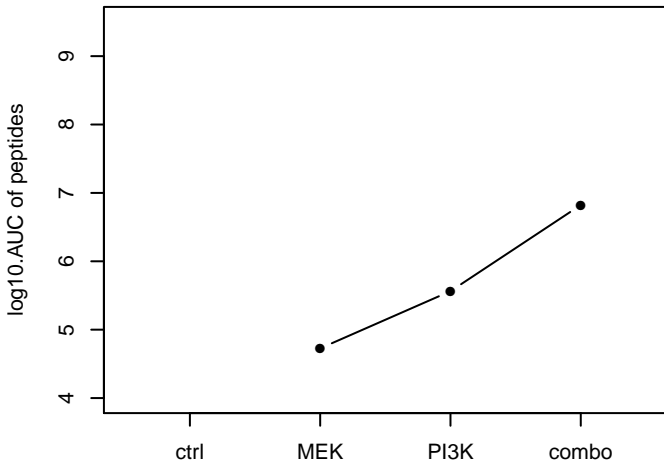**HNRPK\_HUMAN**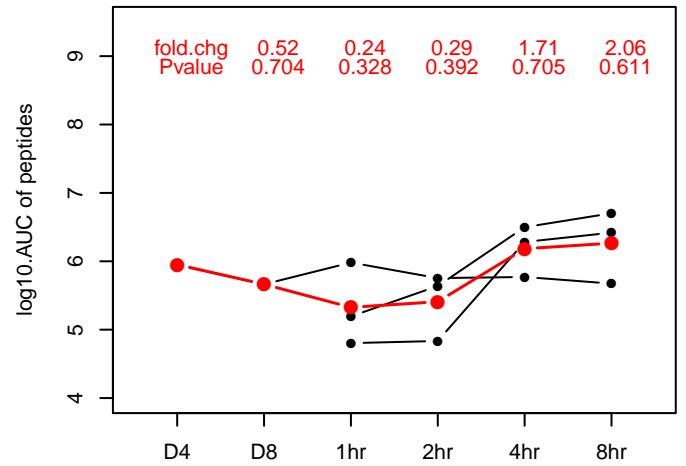

### HNRPU\_HUMAN

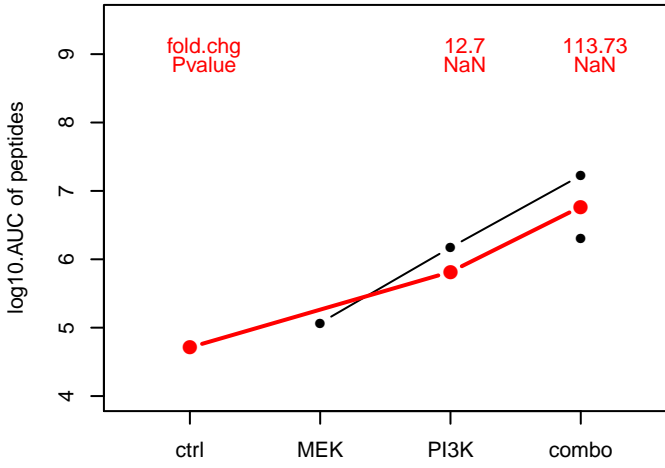

### HNRPU\_HUMAN

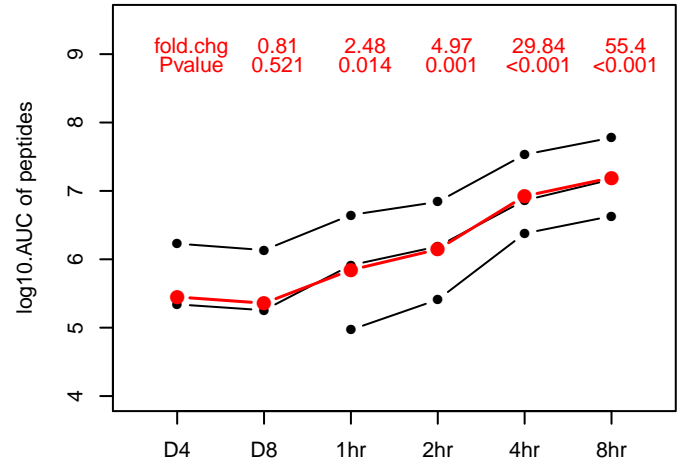

### HP1B3\_HUMAN

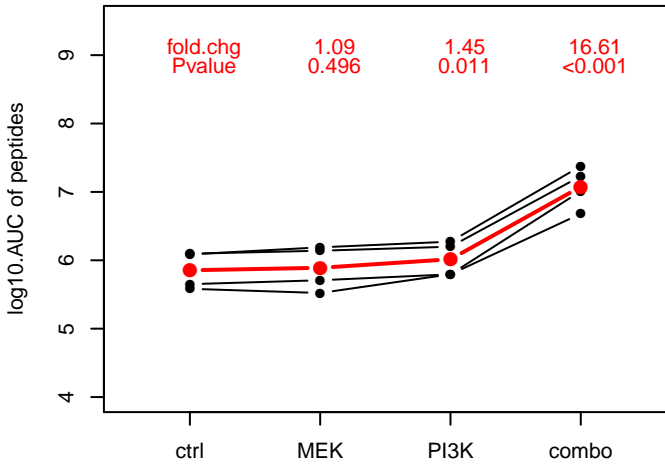

### HP1B3\_HUMAN

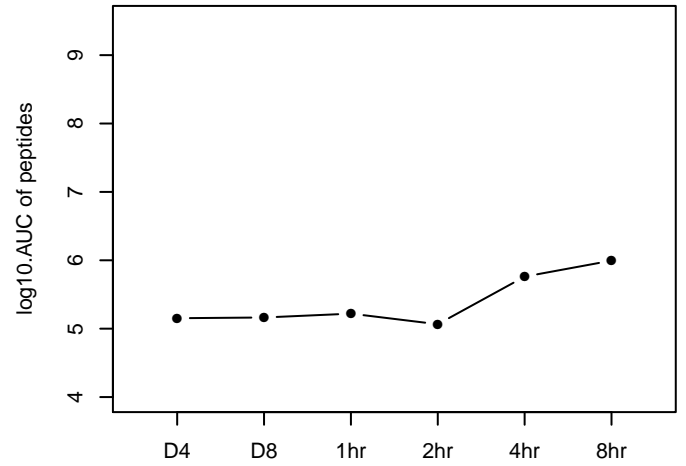

### HS105\_HUMAN

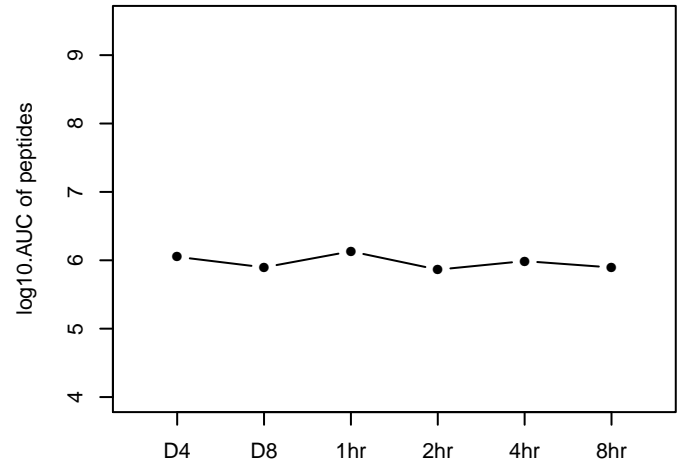

### HS71L\_HUMAN

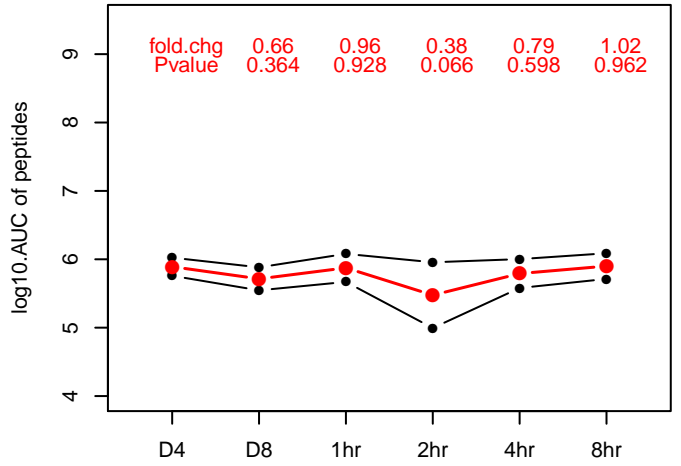

### HS905\_HUMAN

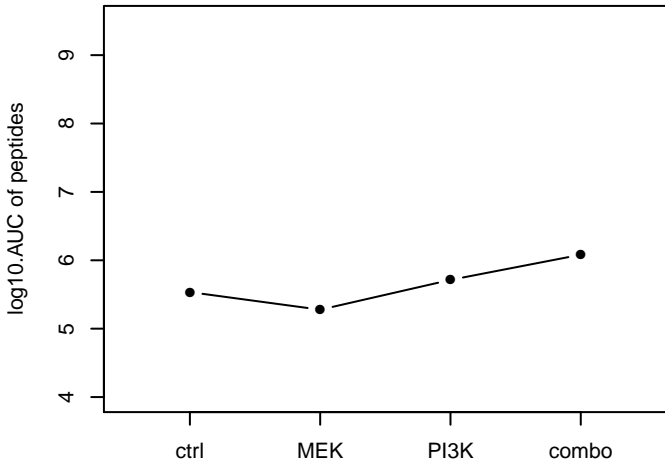

### HS905\_HUMAN

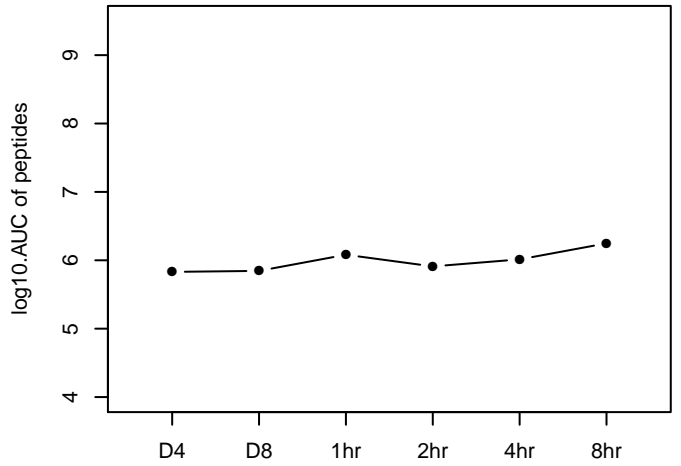

### HS90A\_HUMAN

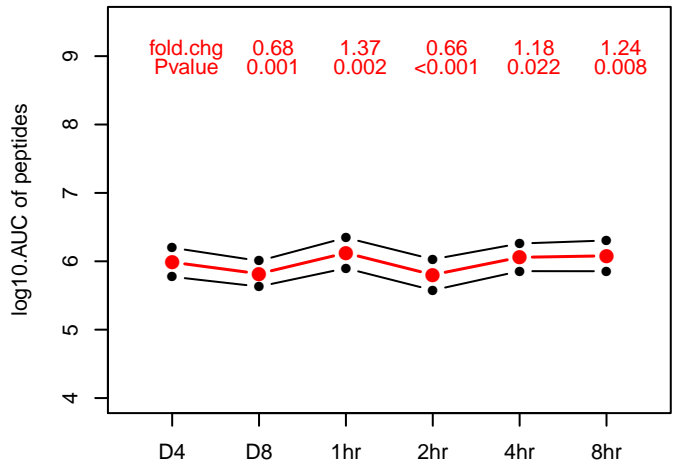

### HS90B\_HUMAN

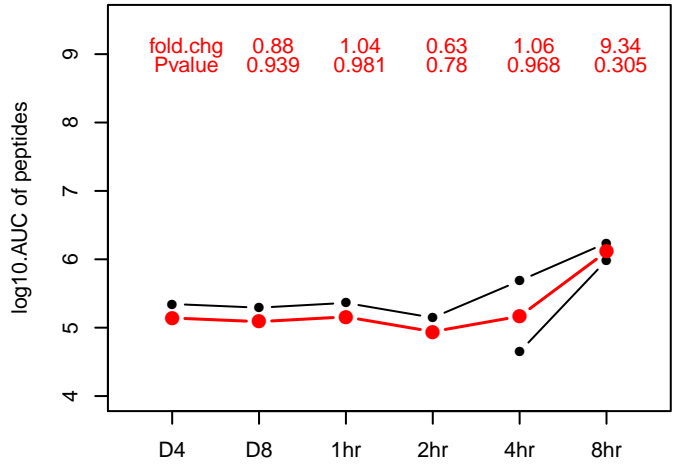

### HSP74\_HUMAN

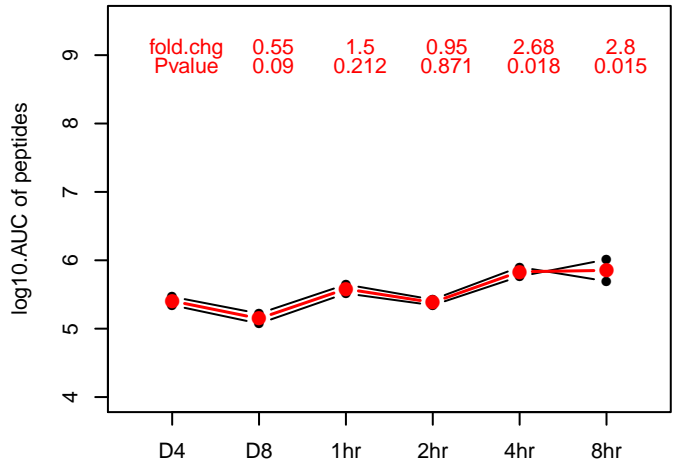

### HSP7C\_HUMAN

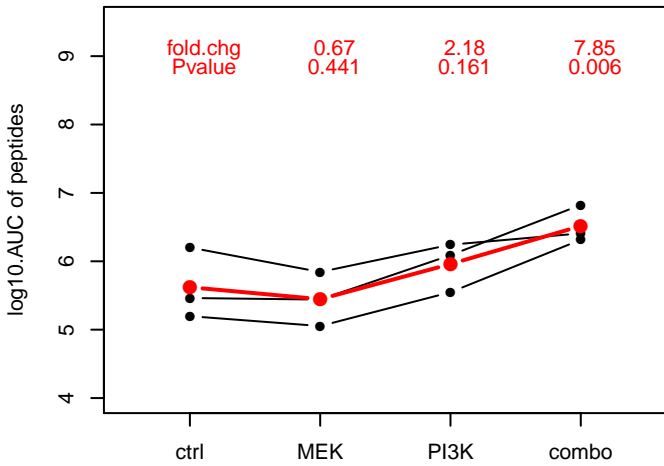

### HSP7C\_HUMAN

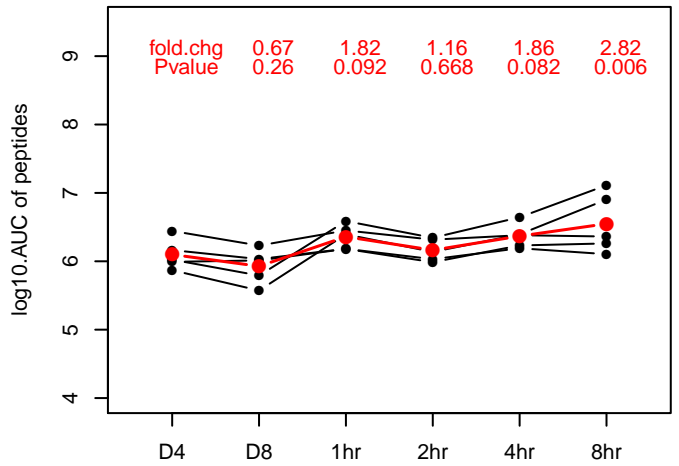

### HSPB1\_HUMAN

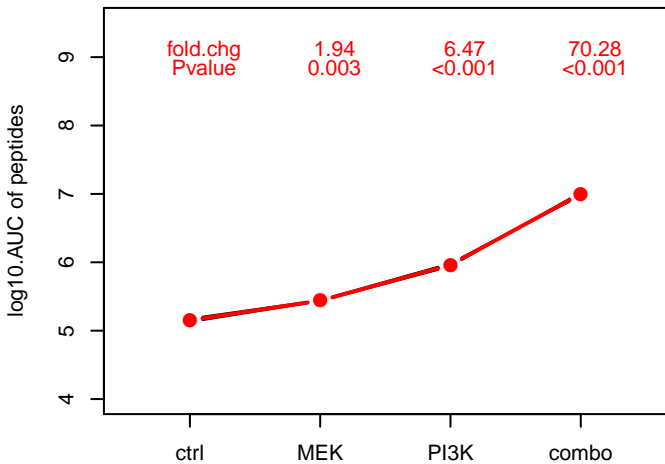

### HSPB1\_HUMAN

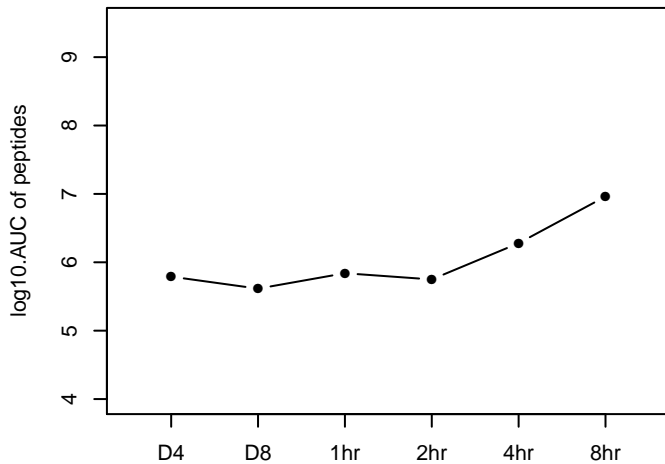

### HTSF1\_HUMAN

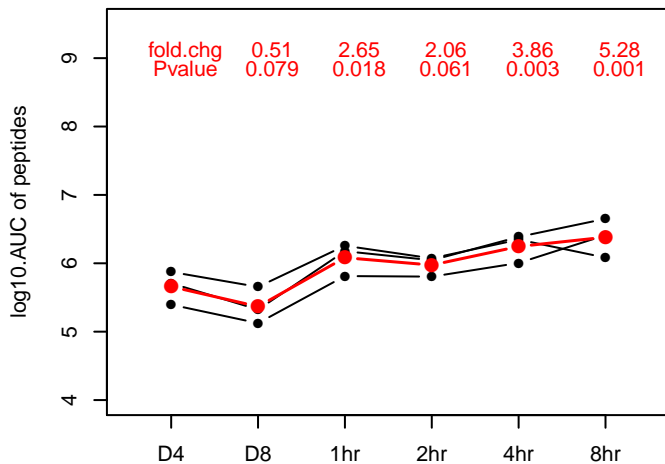

### HUWE1\_HUMAN

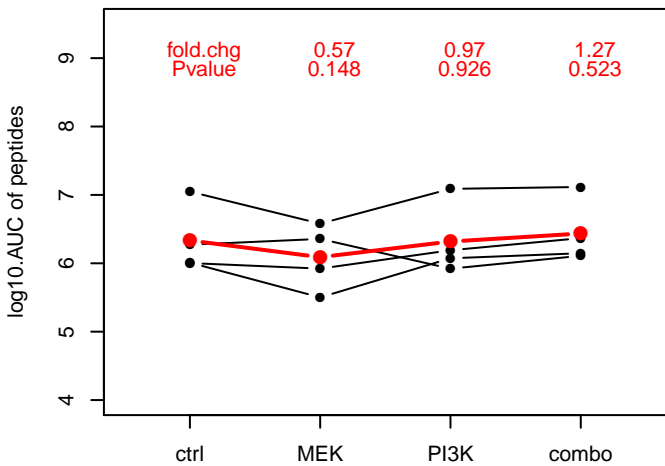

### HUWE1\_HUMAN

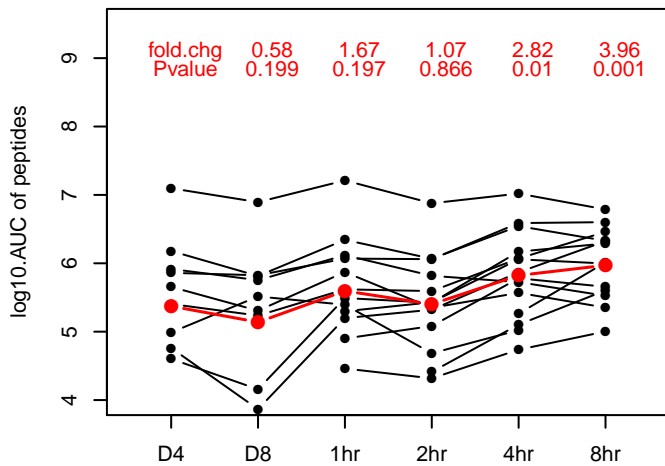

**HXC10\_HUMAN**

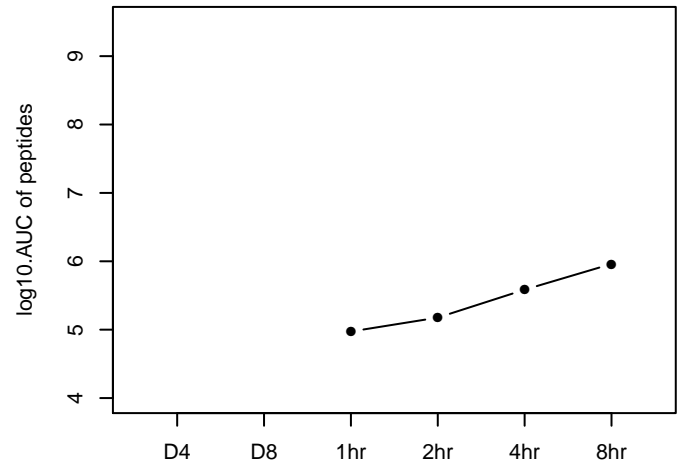

**HYLS1\_HUMAN**

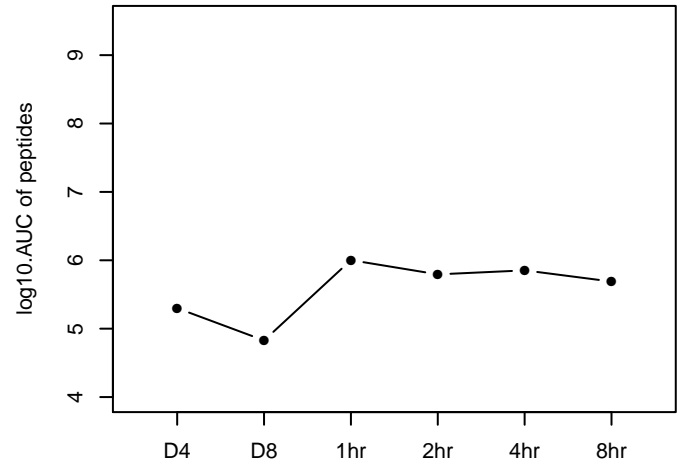

**ICAL\_HUMAN**

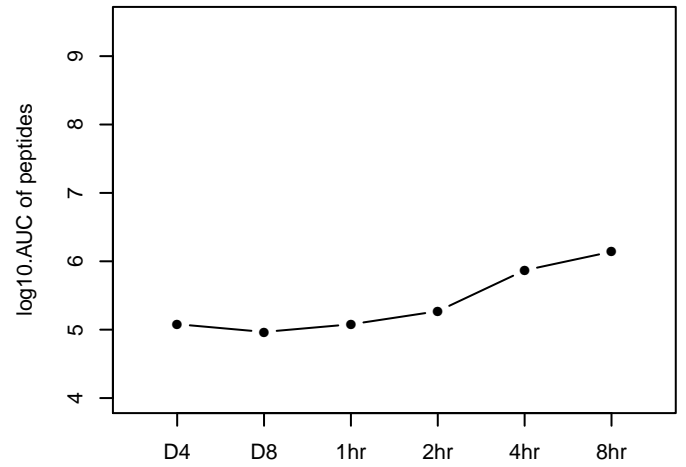



### ICLN\_HUMAN

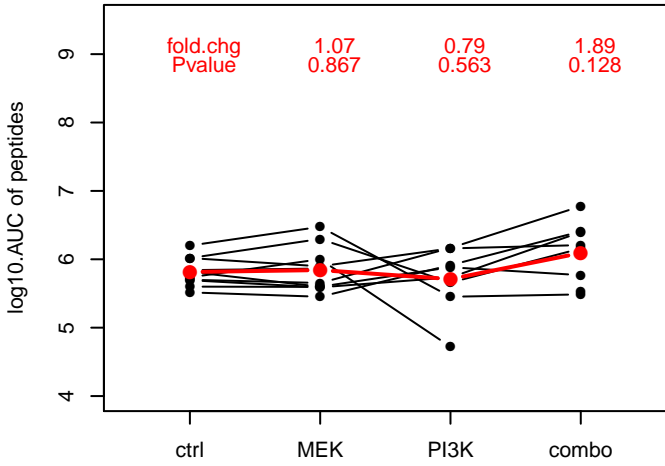

### ICLN\_HUMAN

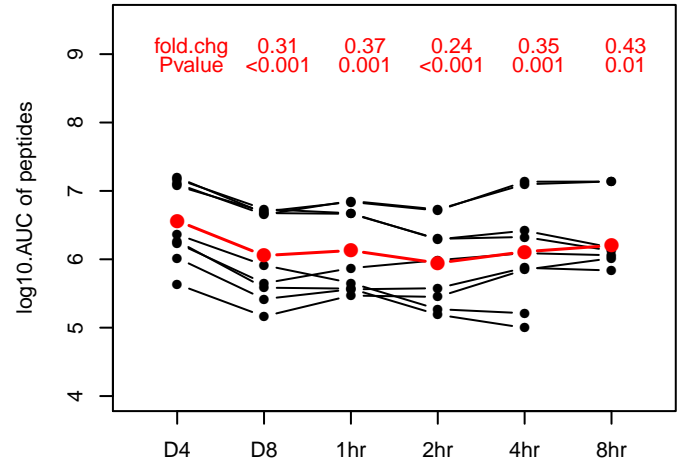

### IDHC\_HUMAN

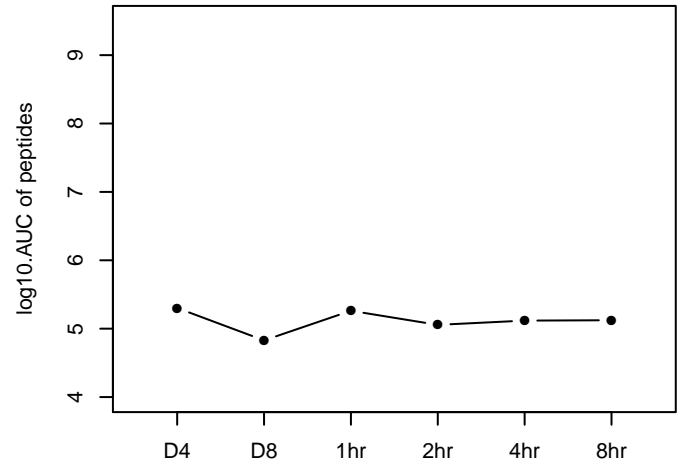

### IF16\_HUMAN

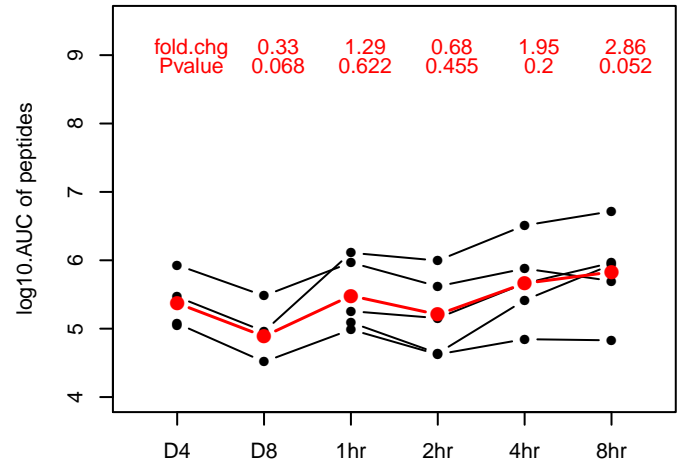

### IF2B\_HUMAN

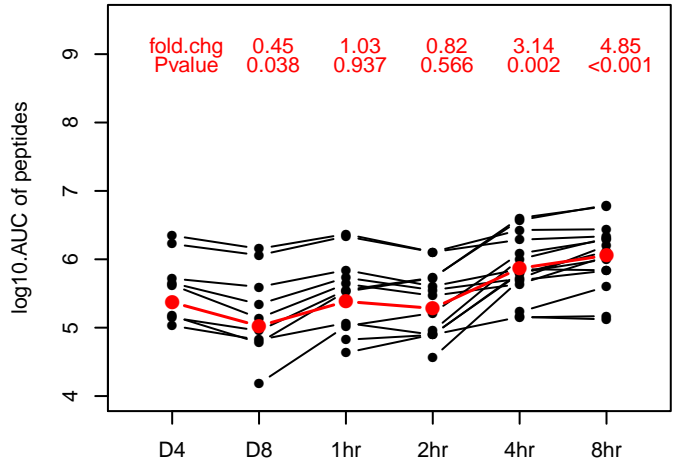

### IF2G\_HUMAN

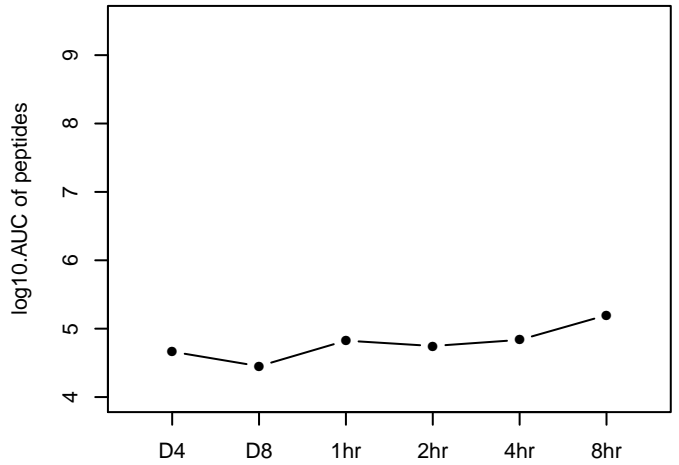

### IF4B\_HUMAN

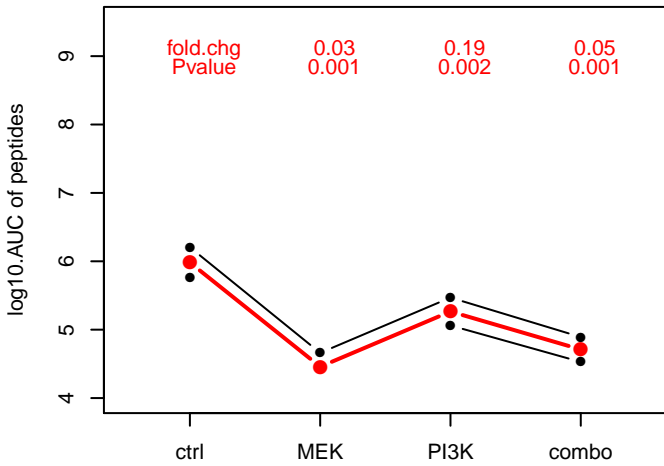

### IF4B\_HUMAN

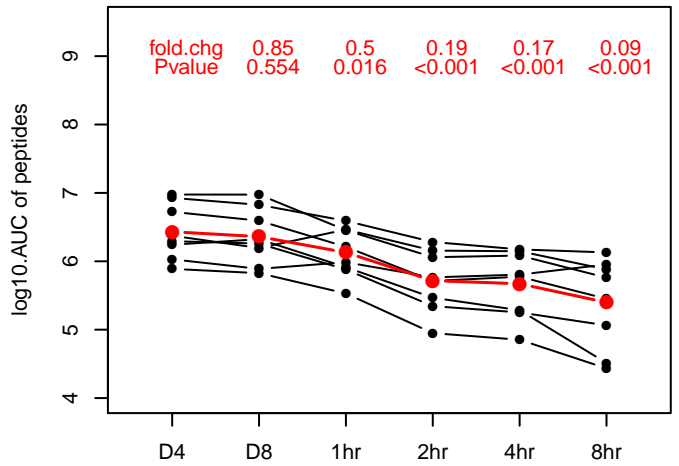

**IF4G1\_HUMAN**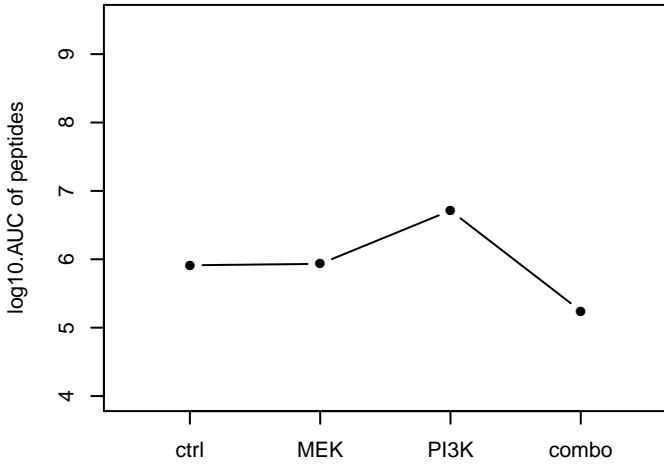**IF4G1\_HUMAN**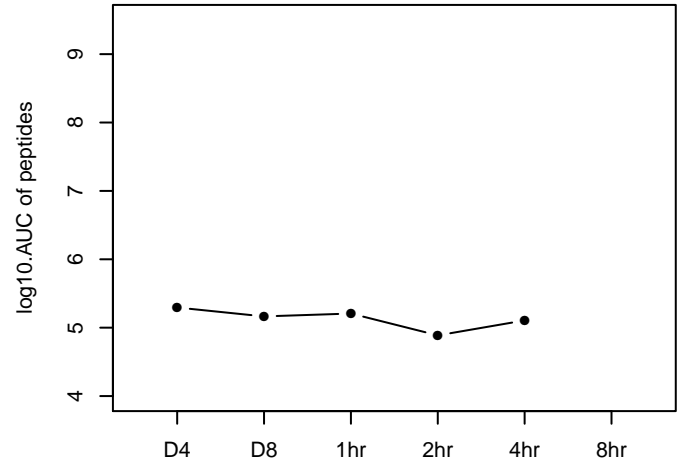**IF4G2\_HUMAN**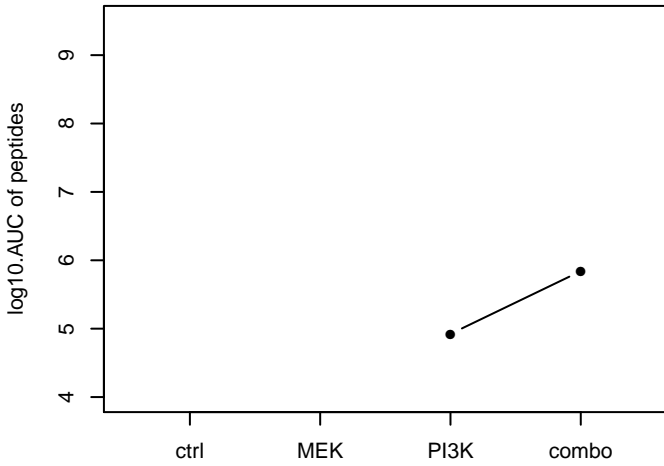**IFT81\_HUMAN**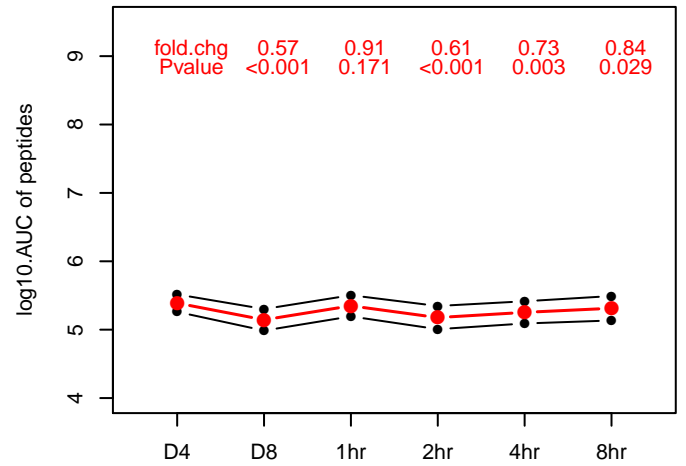

**ILF2\_HUMAN**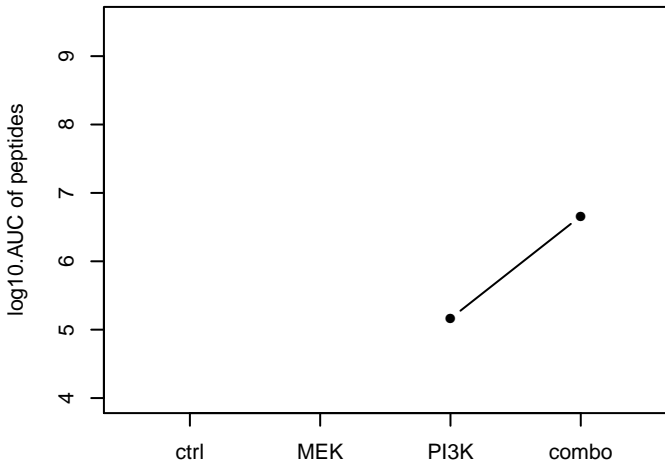**ILF2\_HUMAN**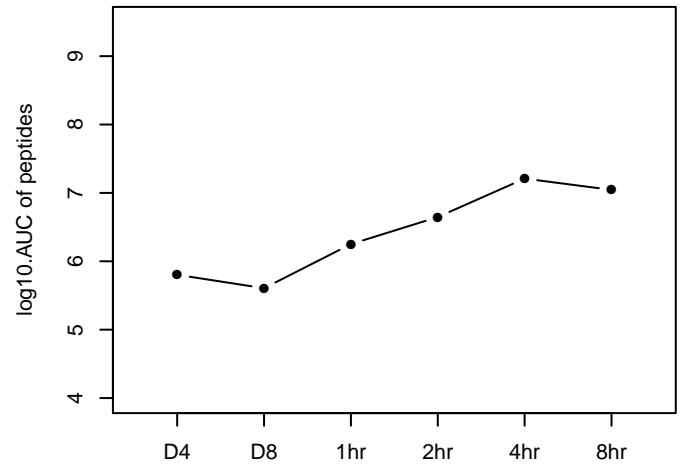**IMA2\_HUMAN**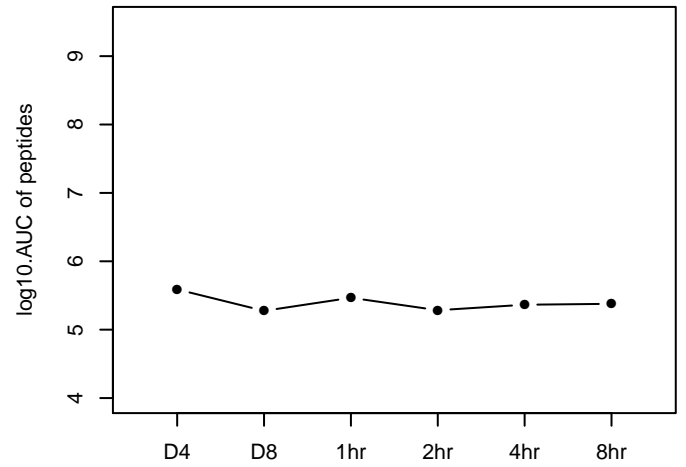**IMB1\_HUMAN**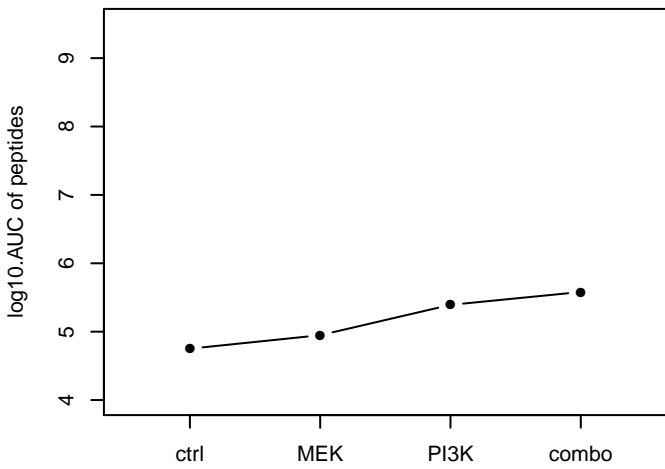

### IMDH2\_HUMAN

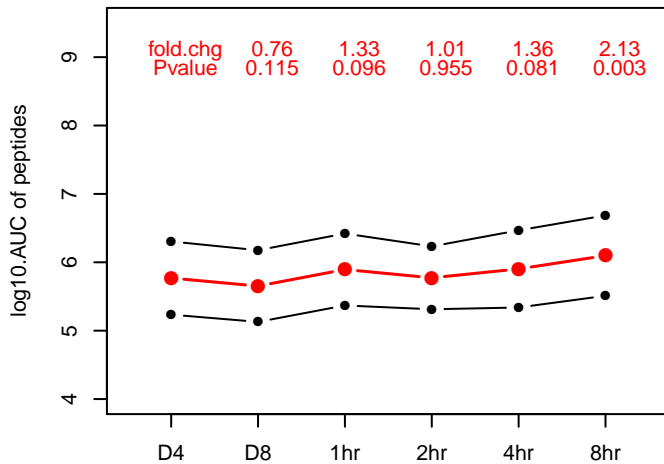

### IMMT\_HUMAN

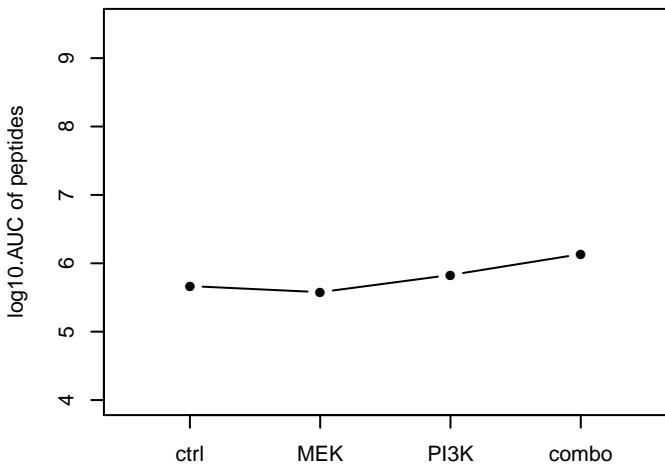

### IMMT\_HUMAN

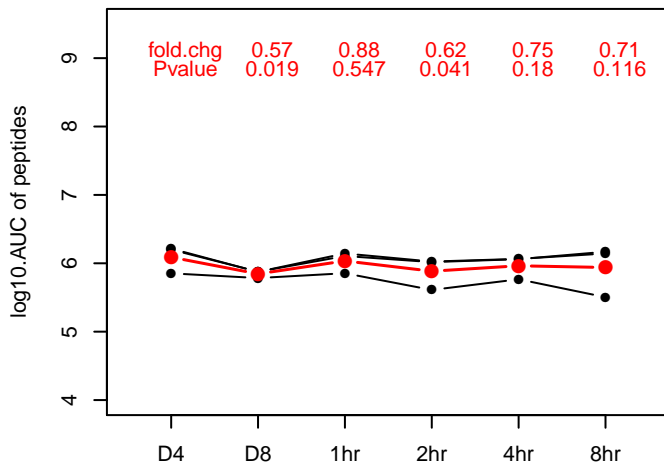

### INCE\_HUMAN

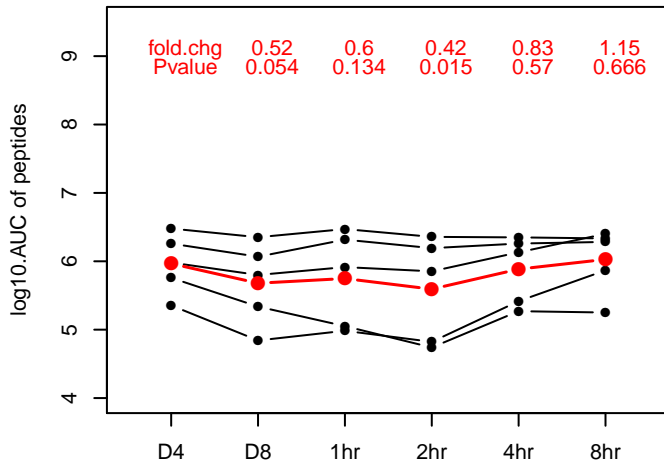

### INT5\_HUMAN

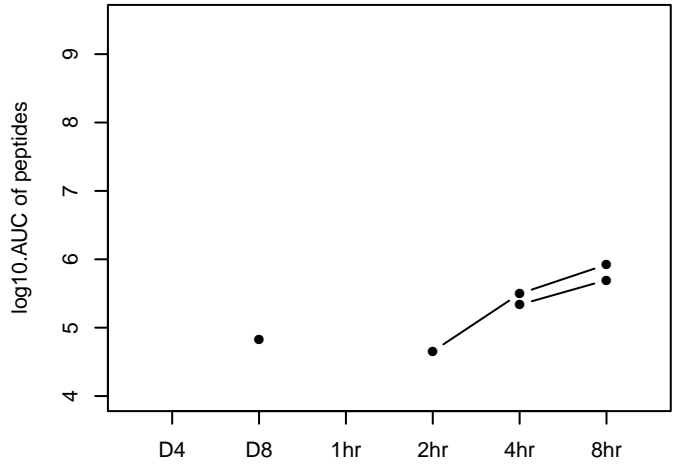

### IQGA1\_HUMAN

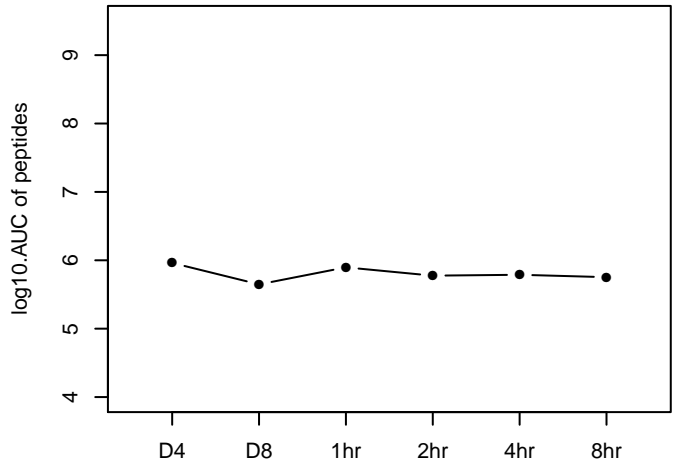

### IRS1\_HUMAN

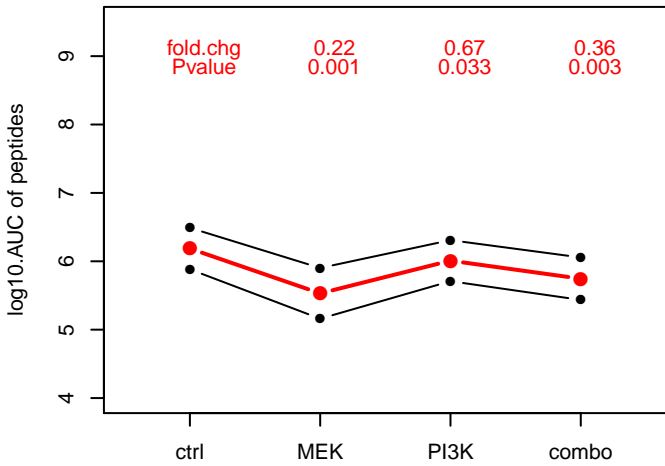

### IRS1\_HUMAN

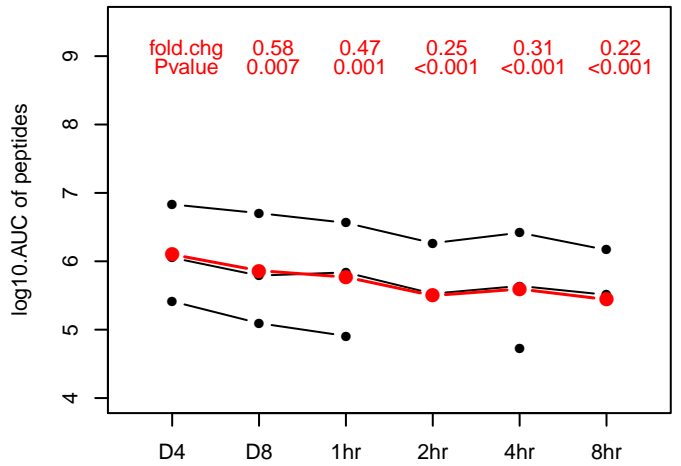

### IRS2\_HUMAN

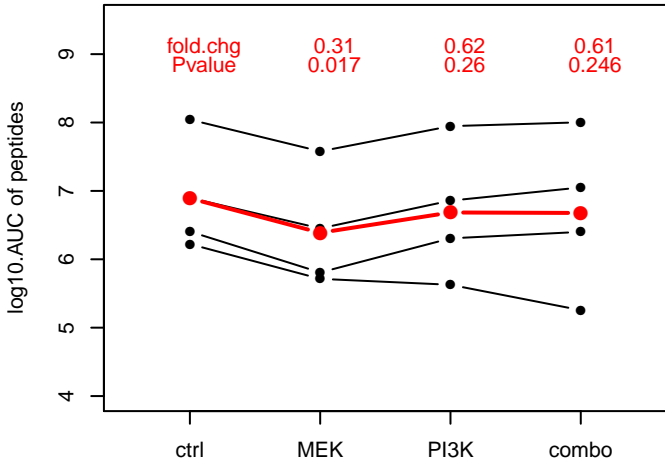

### IRS2\_HUMAN

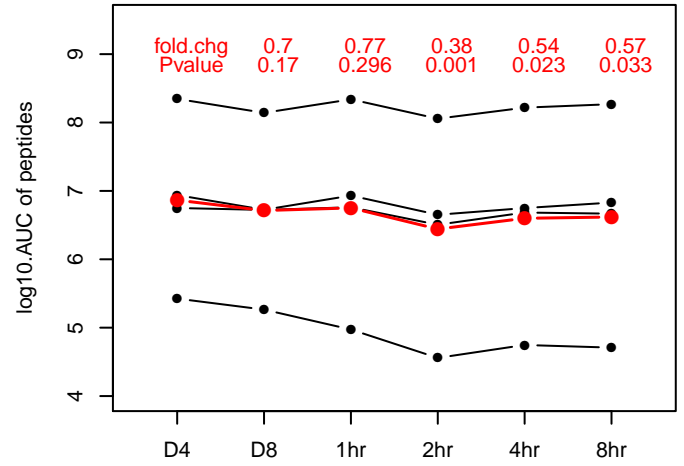

### JHD2C\_HUMAN

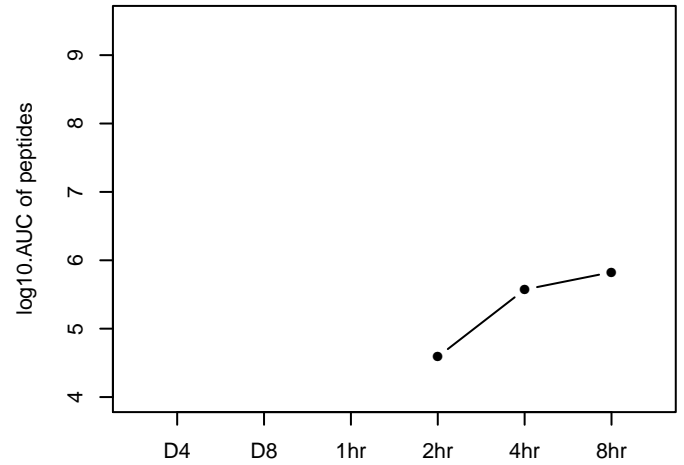

### JIP4\_HUMAN

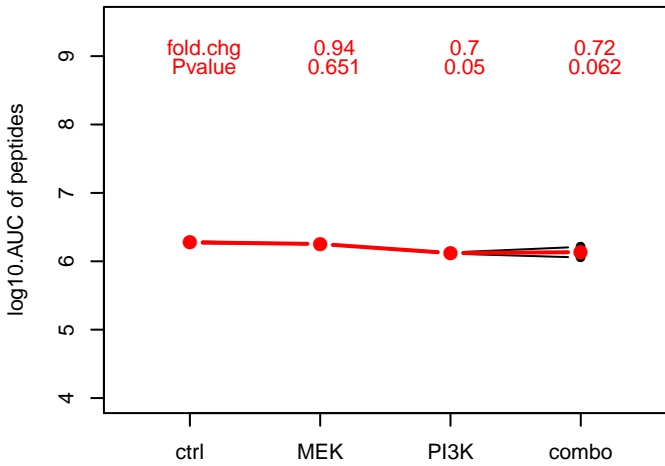

### JIP4\_HUMAN

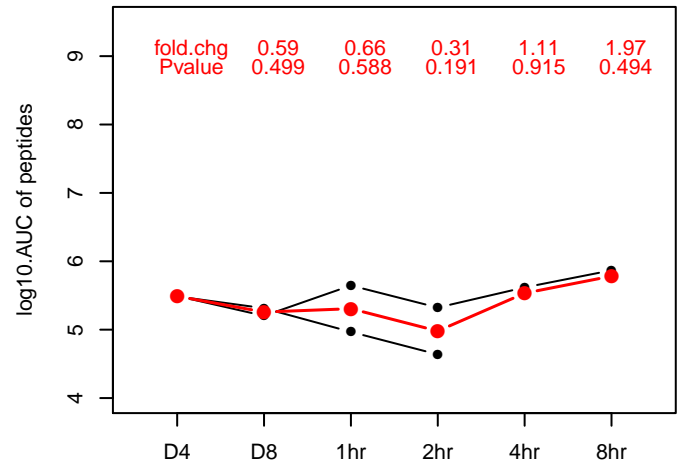

**JMJD6\_HUMAN**

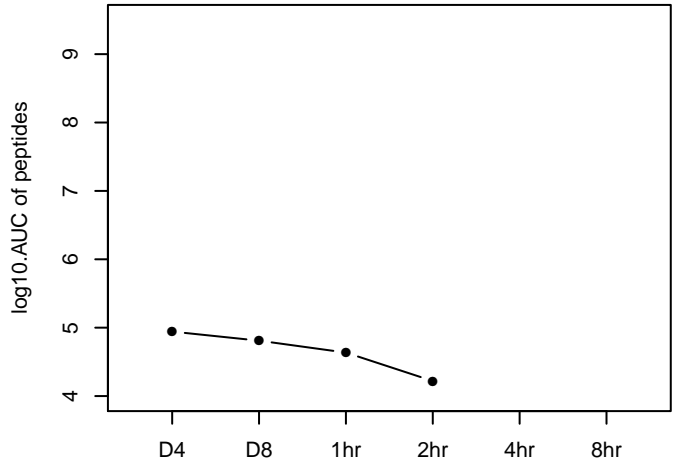

**K0528\_HUMAN**

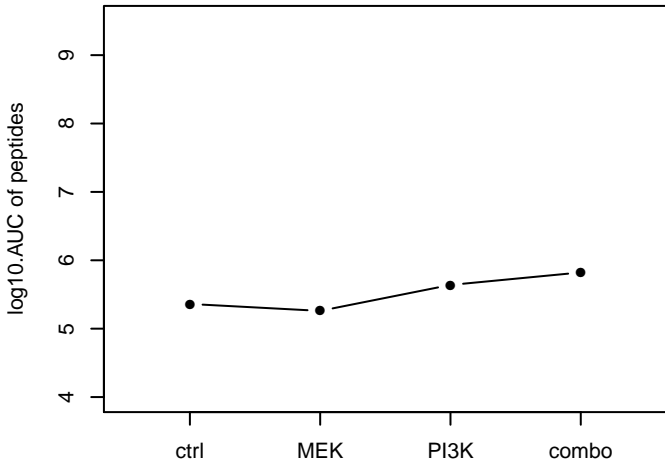

**K0528\_HUMAN**

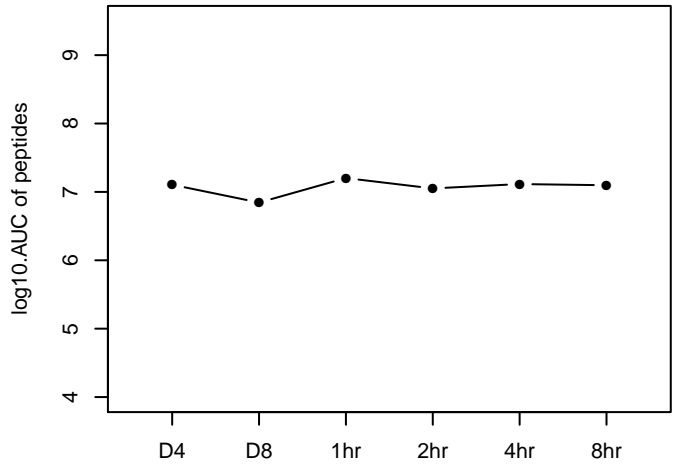

**K0664\_HUMAN**

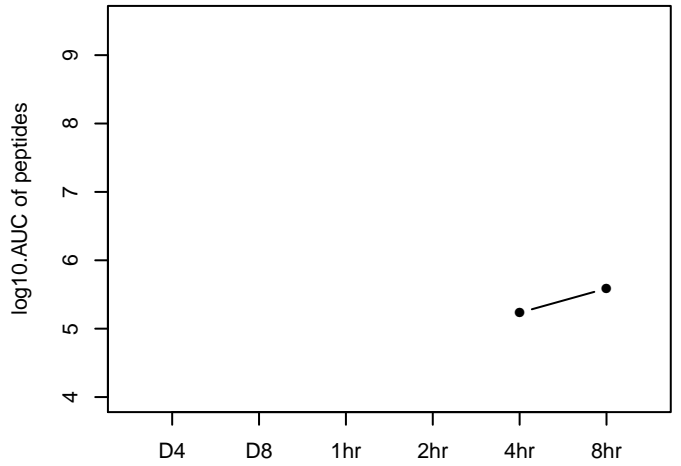



### K0947\_HUMAN

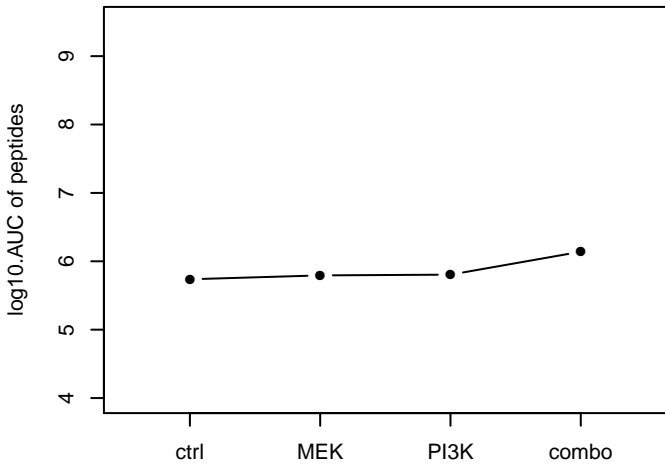

### K1109\_HUMAN

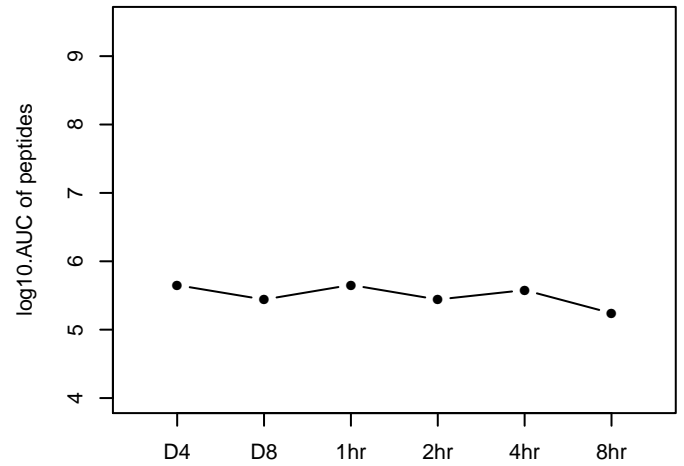

### K1967\_HUMAN

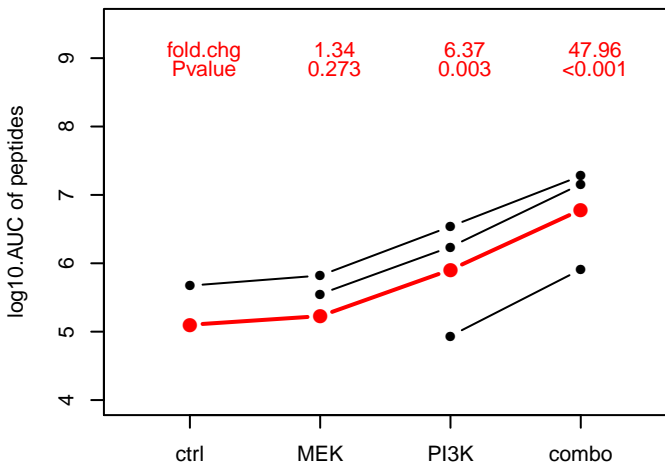

### K1967\_HUMAN

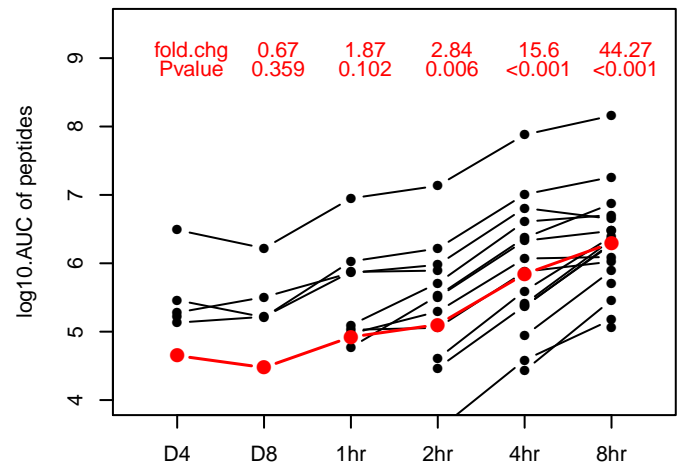

### KAD1\_HUMAN

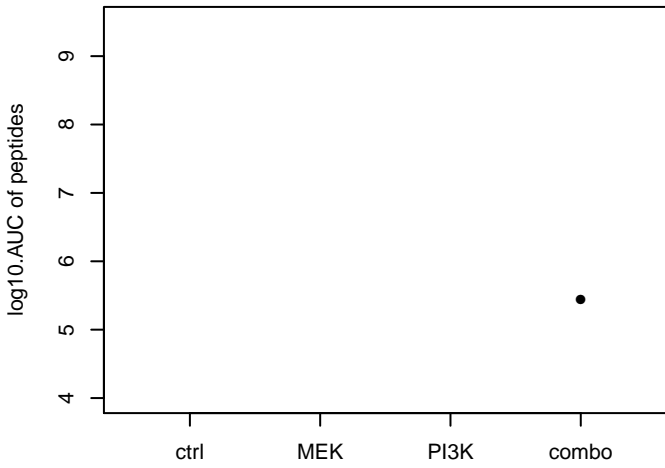

### KANK1\_HUMAN

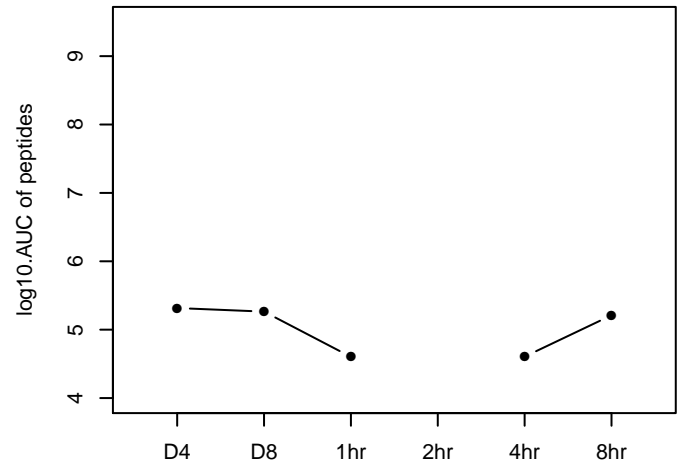

### KAT6A\_HUMAN

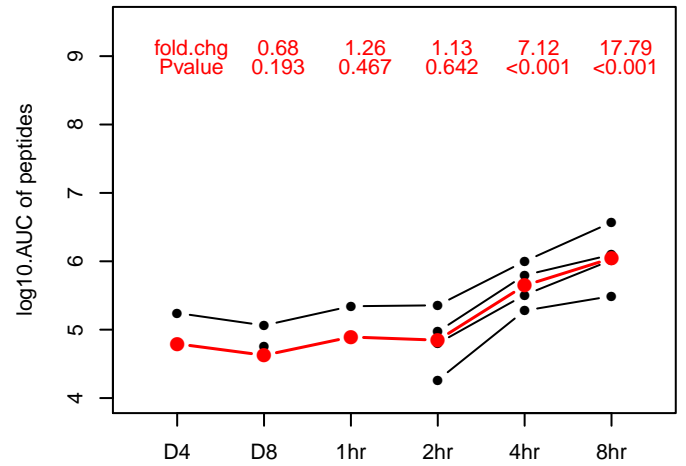

**KAT7\_HUMAN**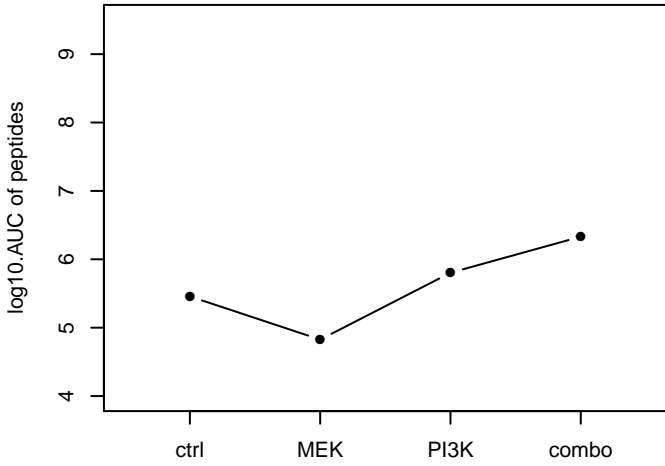**KAT7\_HUMAN**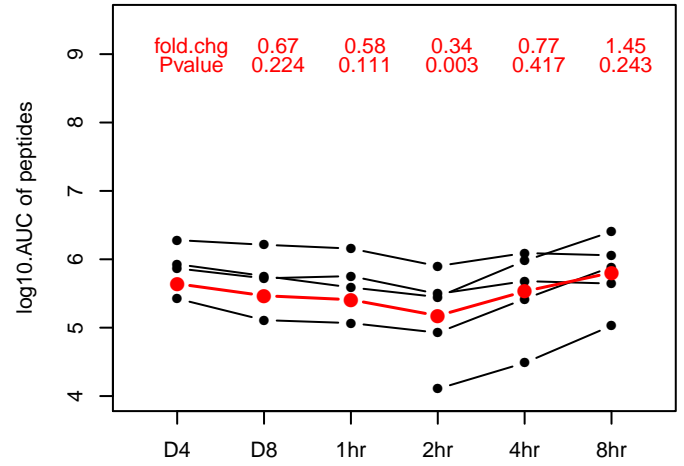**KC1D\_HUMAN**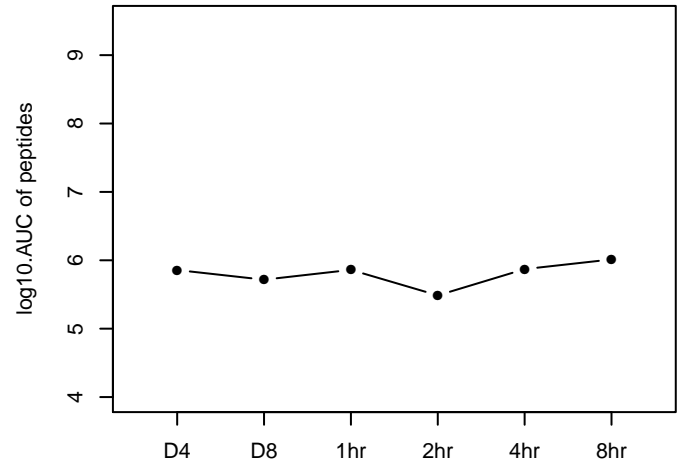**KC1E\_HUMAN**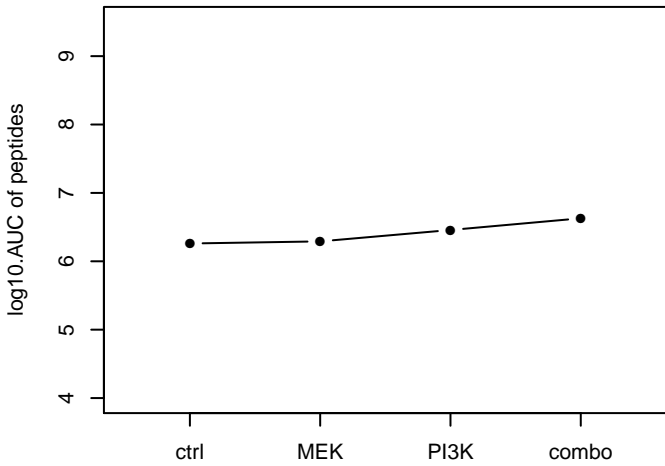**KC1E\_HUMAN**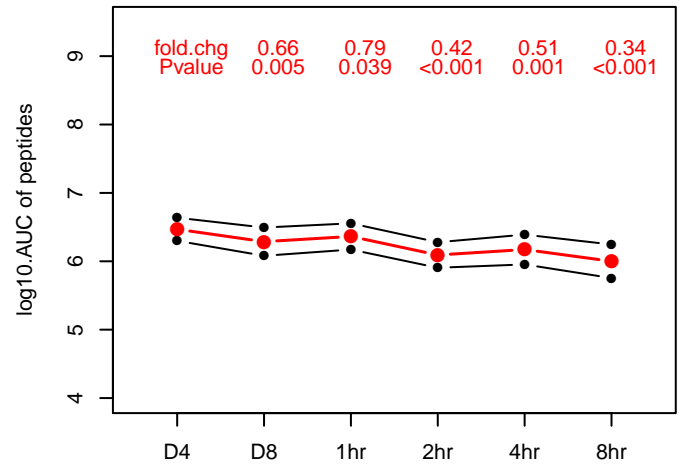

### KDIS\_HUMAN

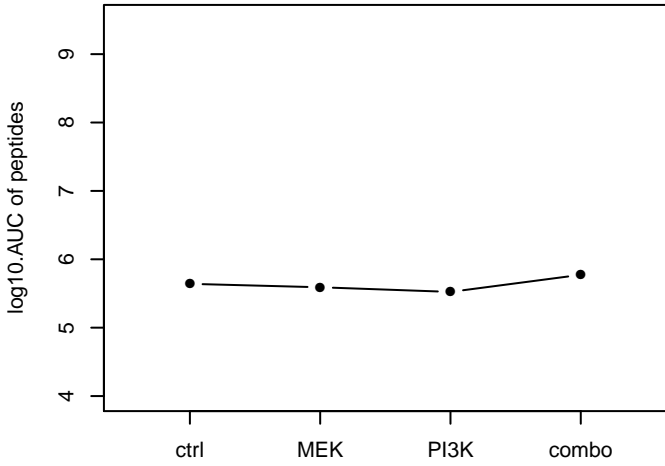

### KDIS\_HUMAN

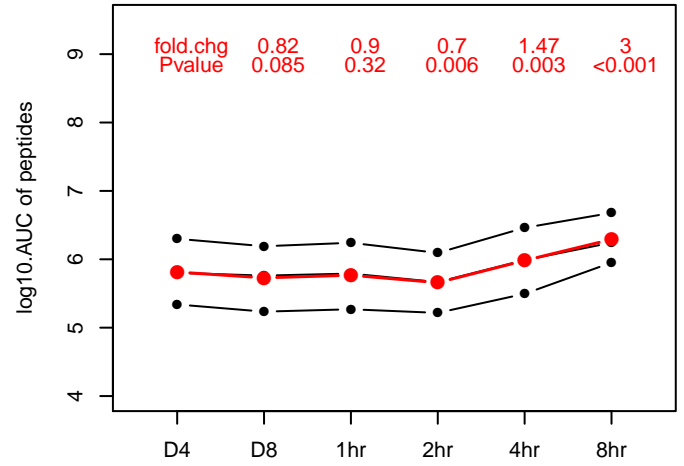

### KDM2A\_HUMAN

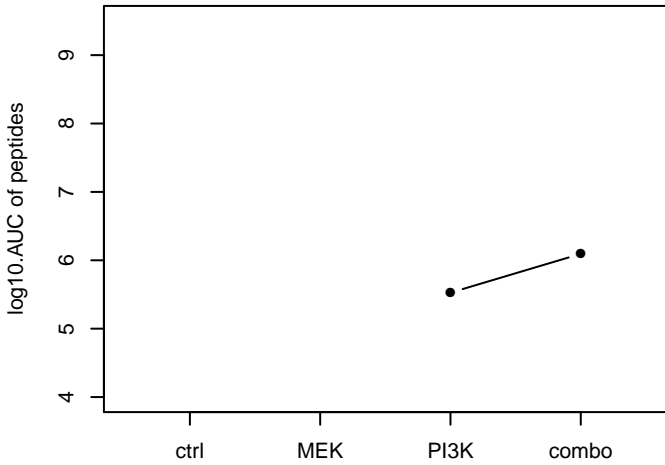

### KDM2A\_HUMAN

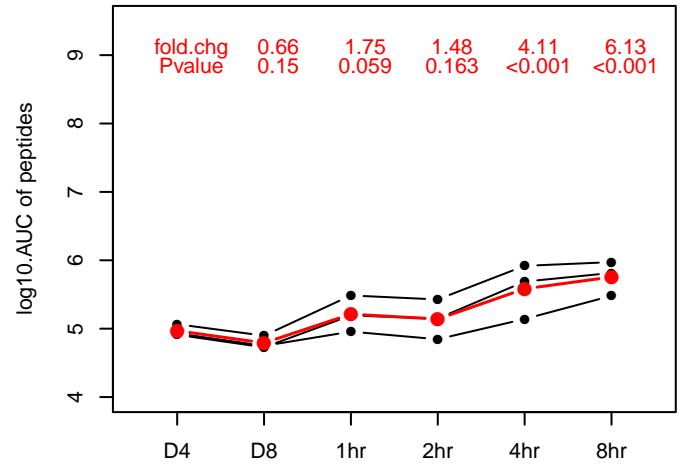

### KDM4A\_HUMAN

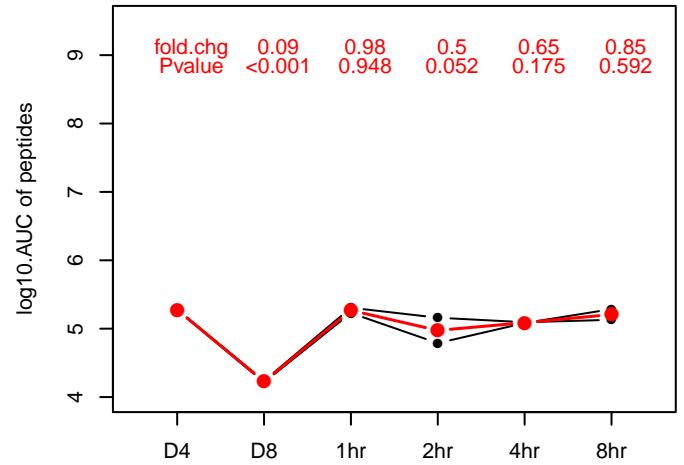

**KI13B\_HUMAN**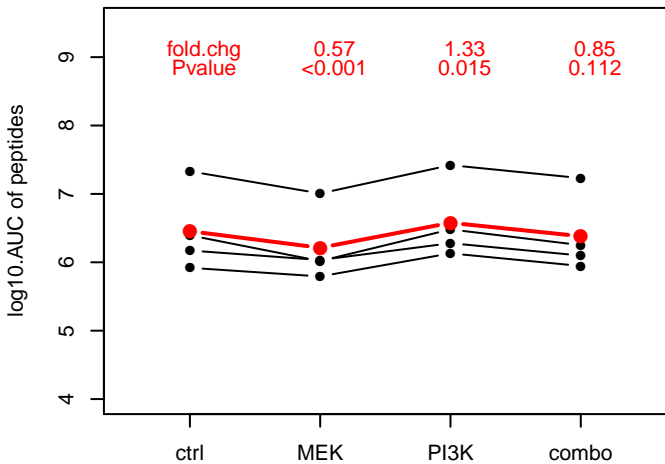**KI13B\_HUMAN**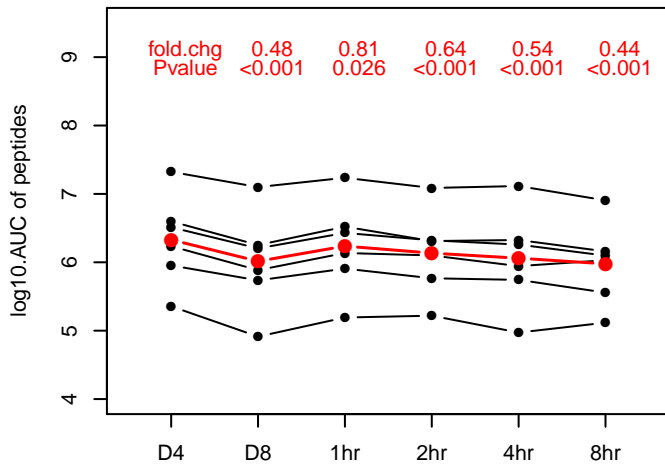**KI18A\_HUMAN**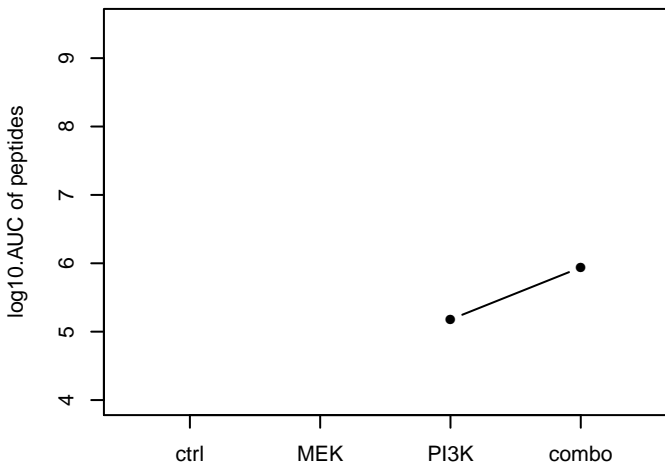**KI20A\_HUMAN**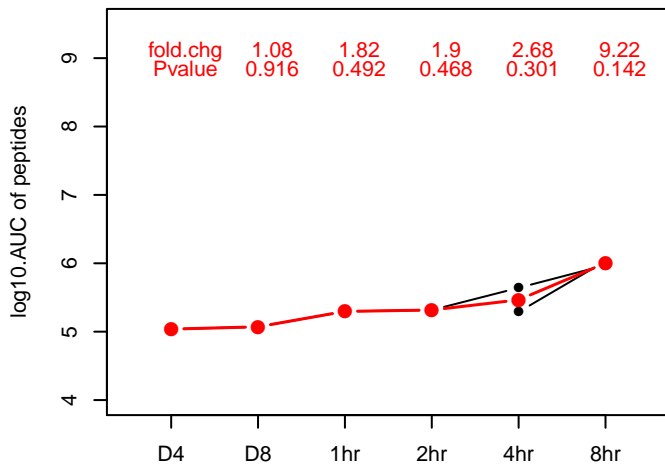

### KI67\_HUMAN

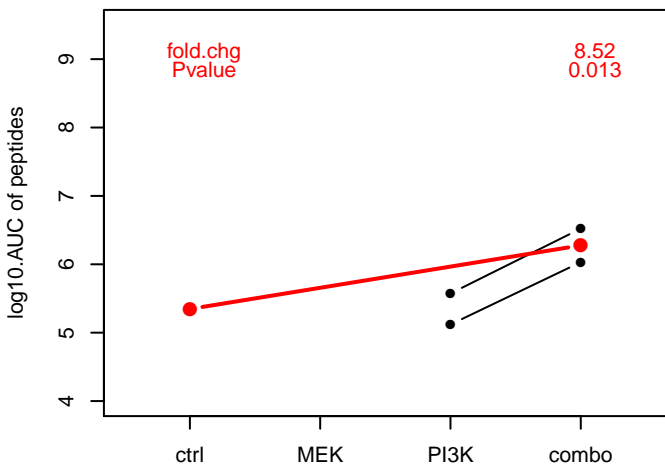

### KI67\_HUMAN

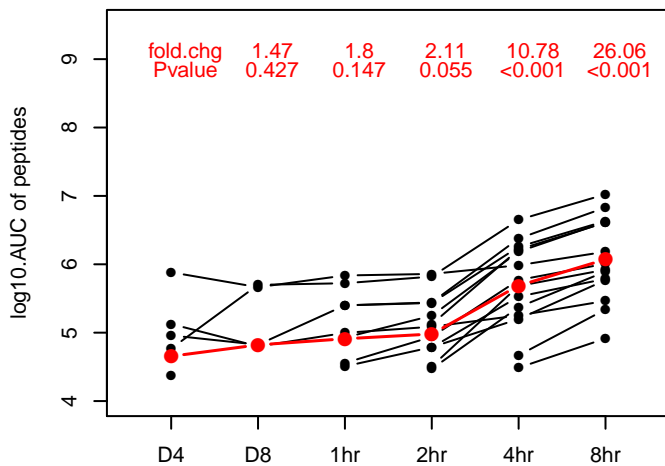

### KIF11\_HUMAN

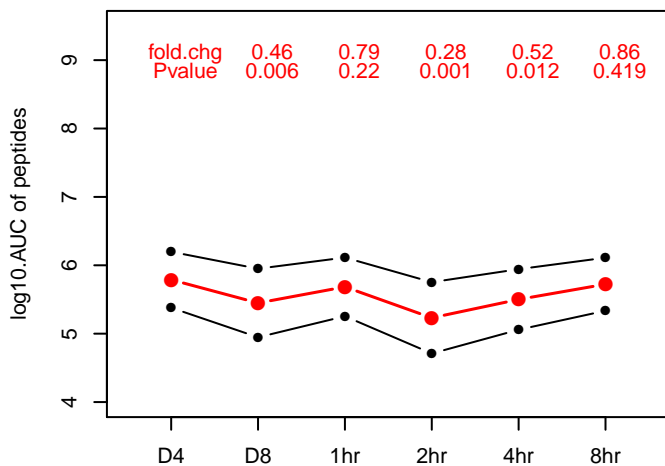

### KIF15\_HUMAN

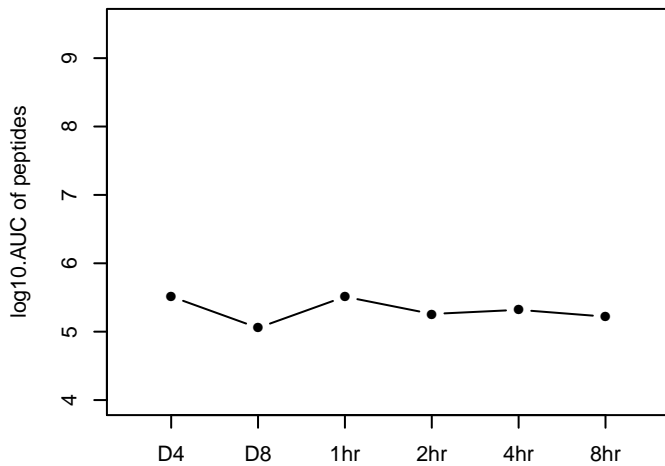

**KIF23\_HUMAN**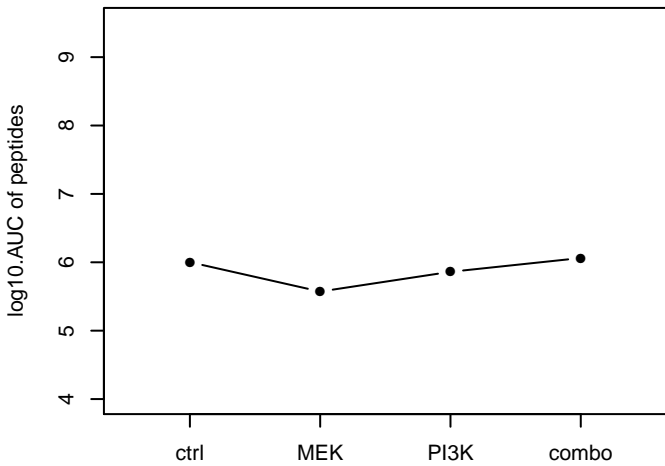**KIF23\_HUMAN**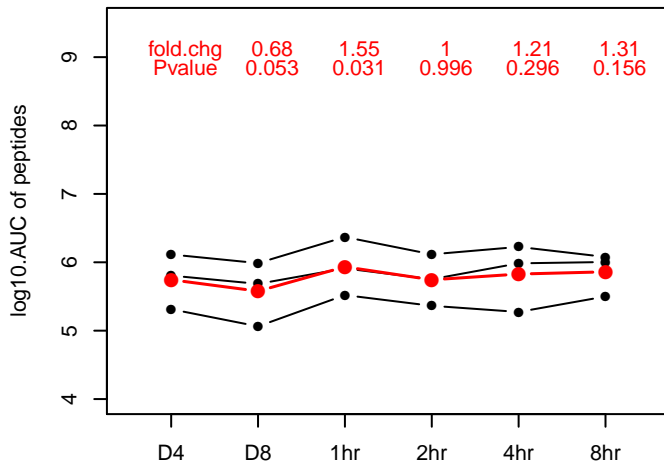**KIF2C\_HUMAN**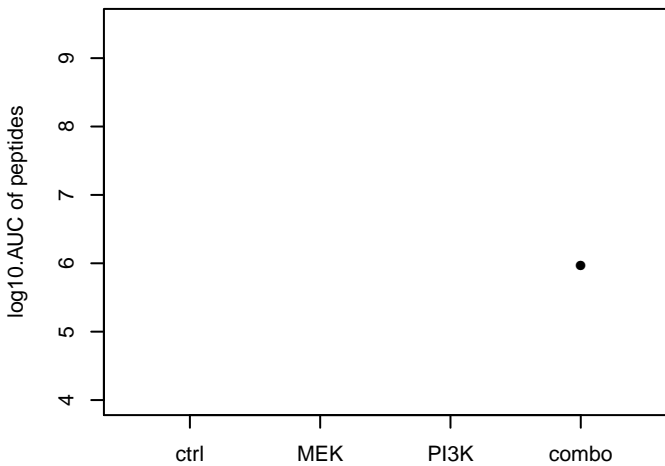**KIF2C\_HUMAN**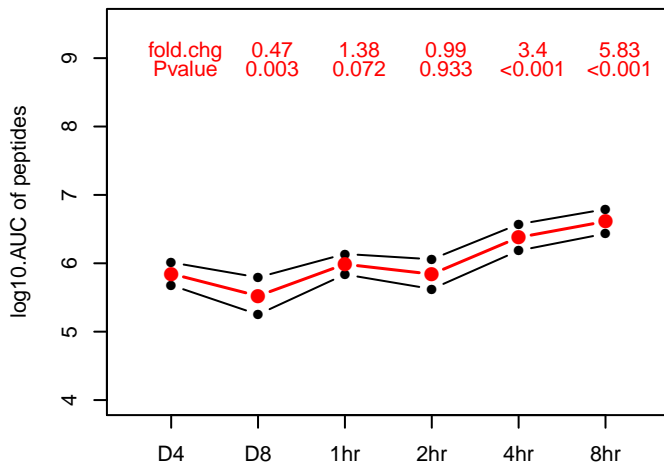**KIF4A\_HUMAN**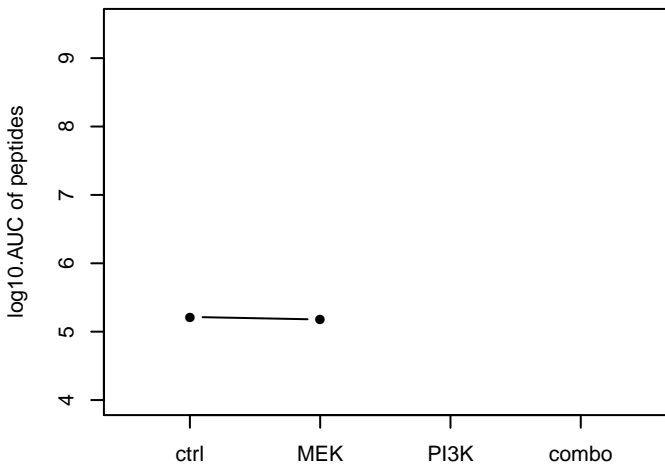**KIF4A\_HUMAN**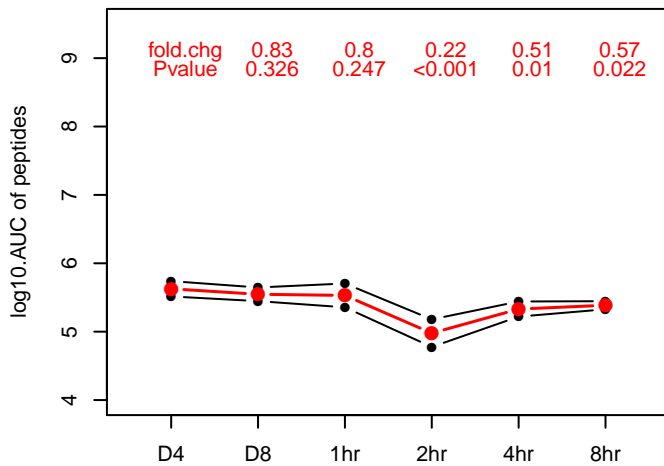

**KIFC1\_HUMAN**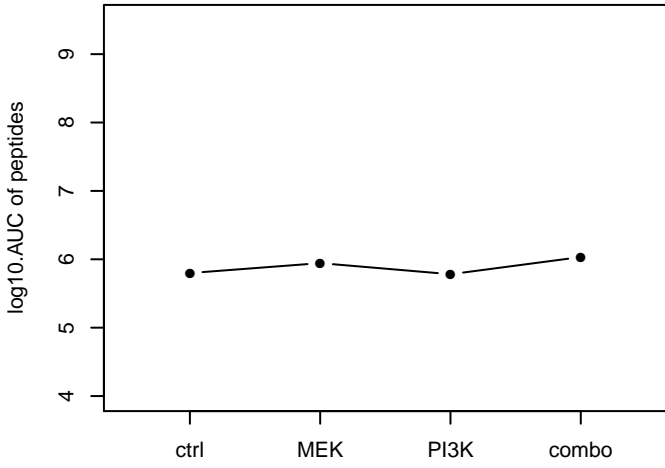**KIFC1\_HUMAN**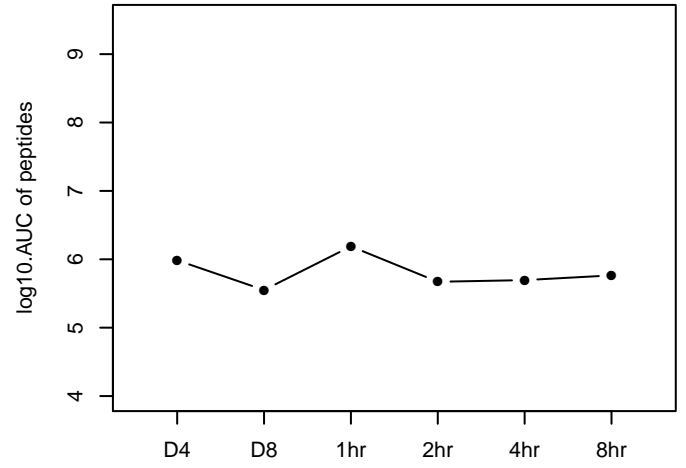**KIRR1\_HUMAN**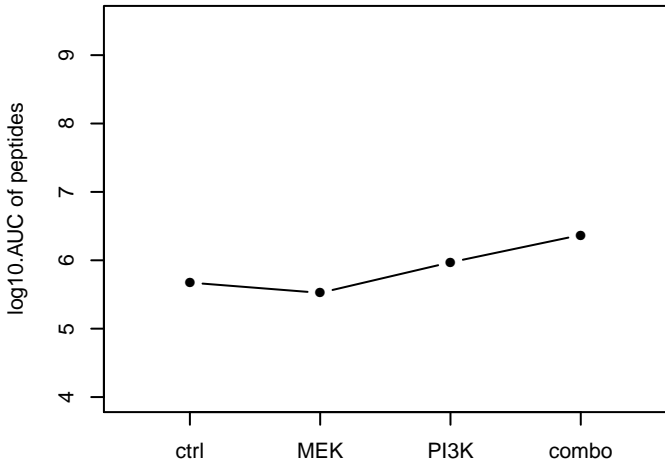**KIRR1\_HUMAN**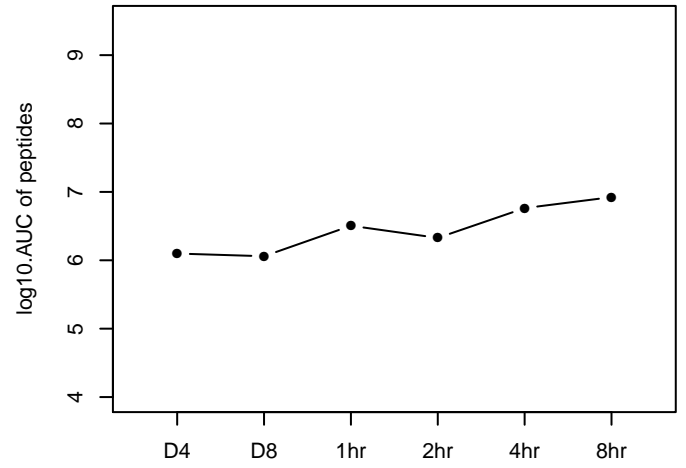**KPCD\_HUMAN**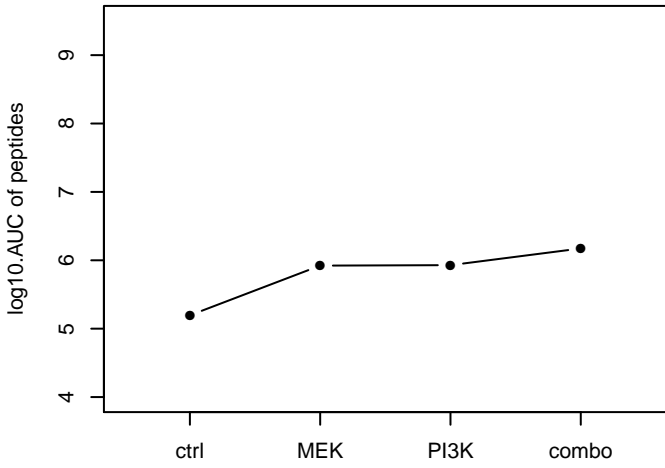**KPCD\_HUMAN**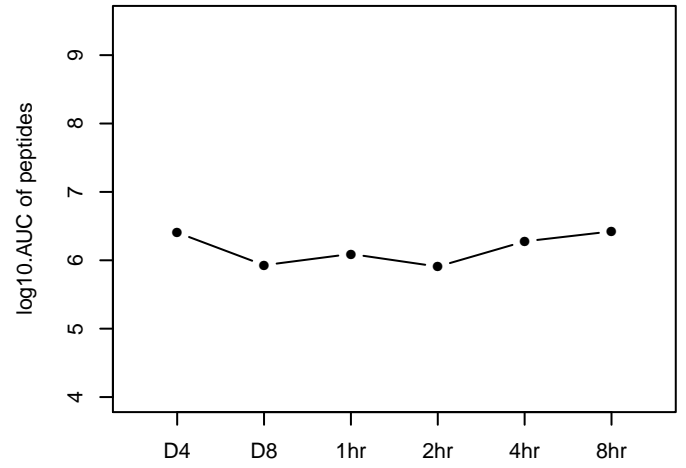



**KPCD1\_HUMAN**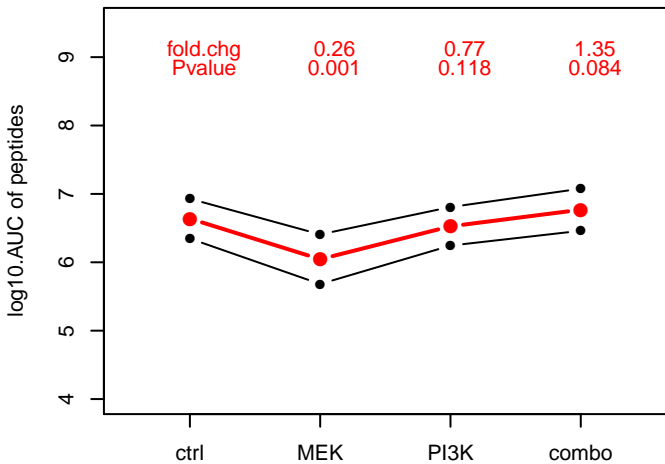**KPCD1\_HUMAN**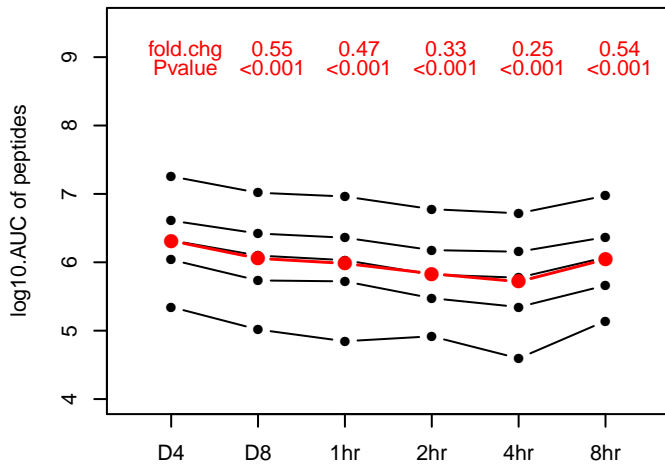**KPYM\_HUMAN**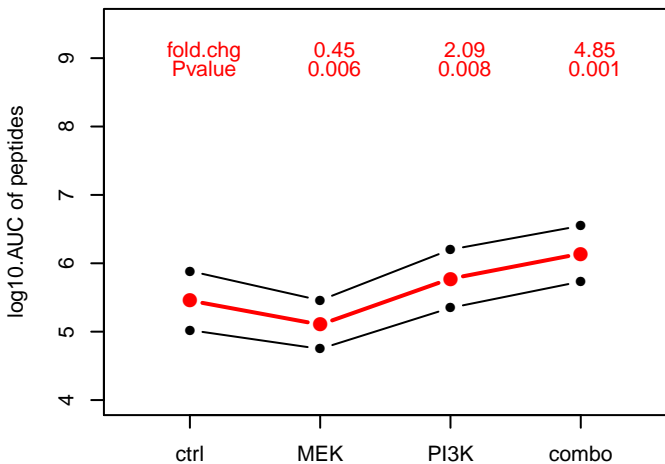**KPYM\_HUMAN**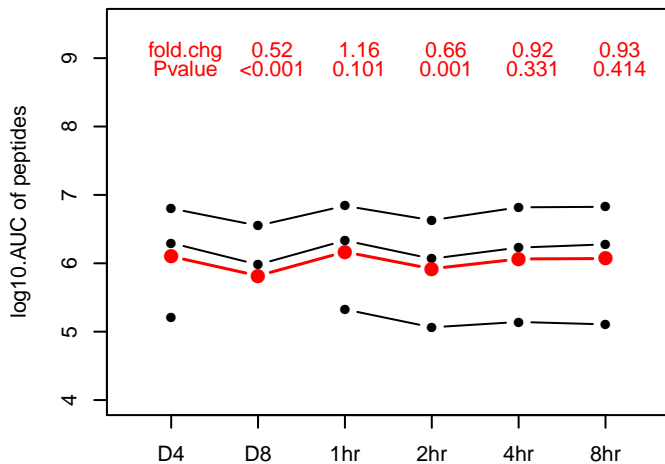**KRI1\_HUMAN**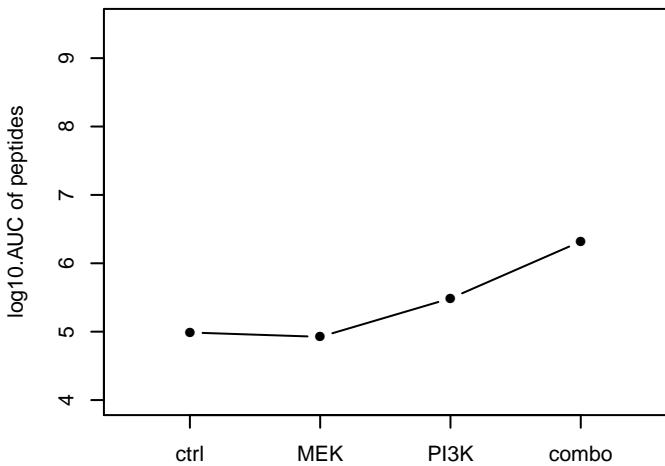**KRI1\_HUMAN**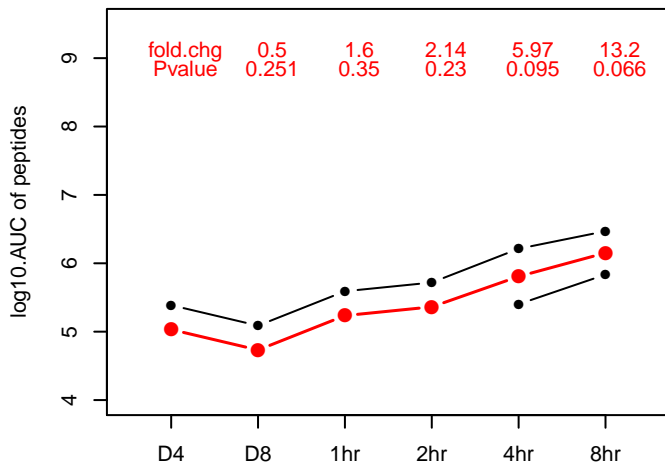

**KS6A5\_HUMAN**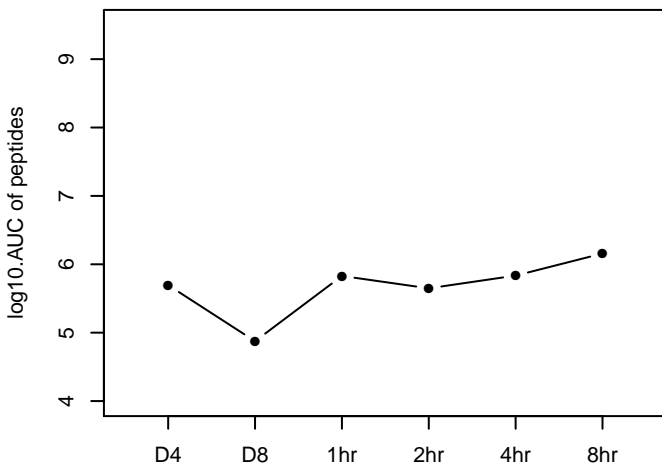**LAP2\_HUMAN**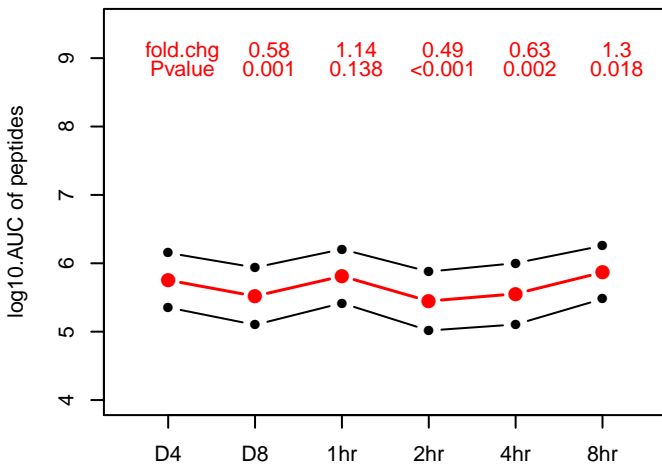**LAP2A\_HUMAN**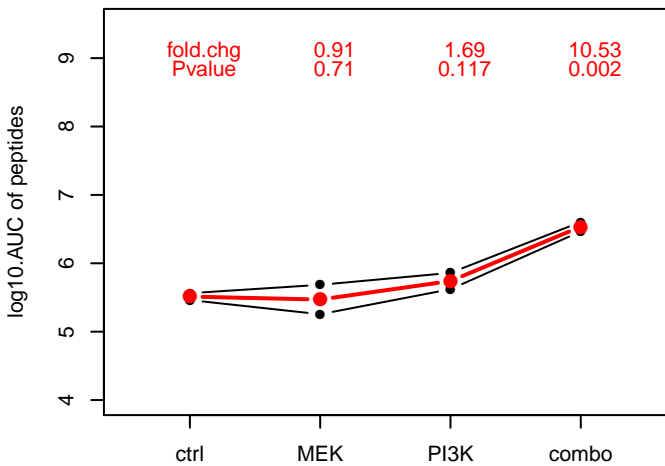**LAP2A\_HUMAN**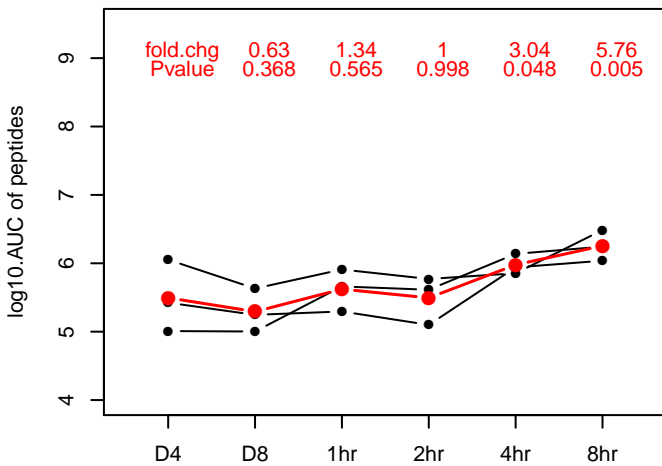

### LAP2B\_HUMAN

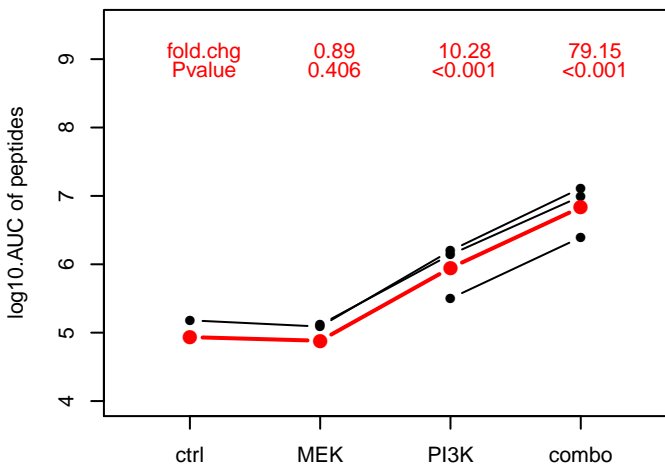

### LAP2B\_HUMAN

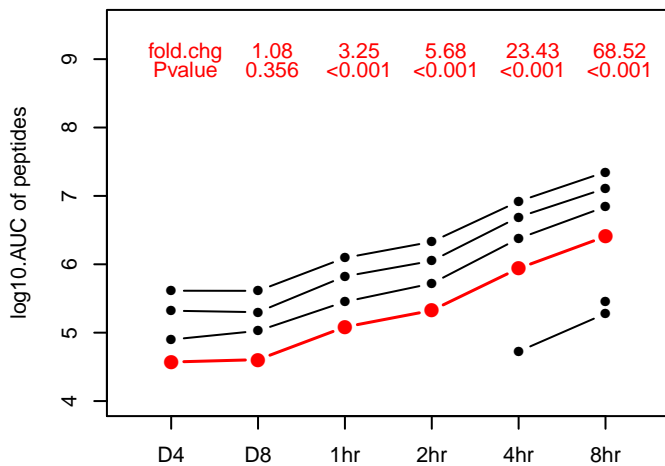

### LARP1\_HUMAN

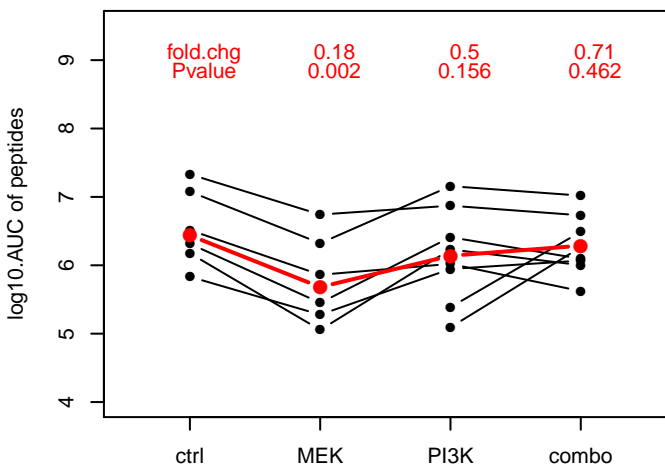

### LARP1\_HUMAN

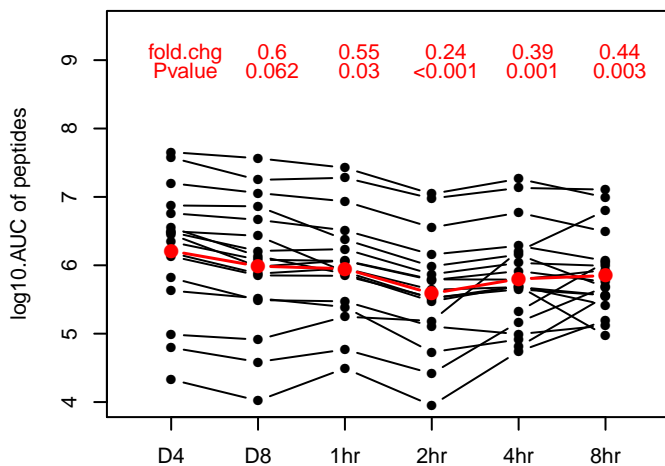

### LARP4\_HUMAN

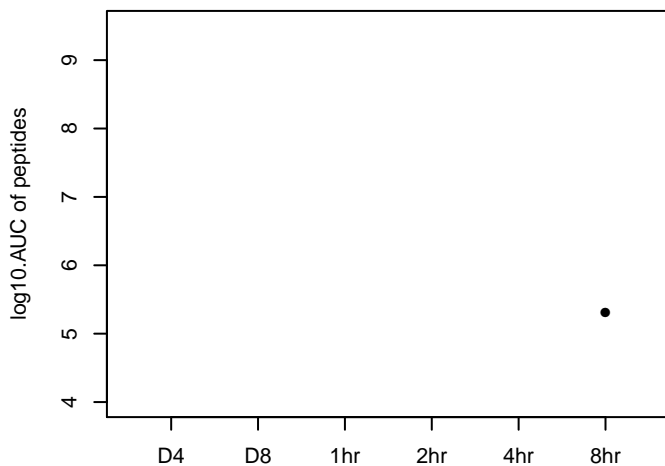

### LASP1\_HUMAN

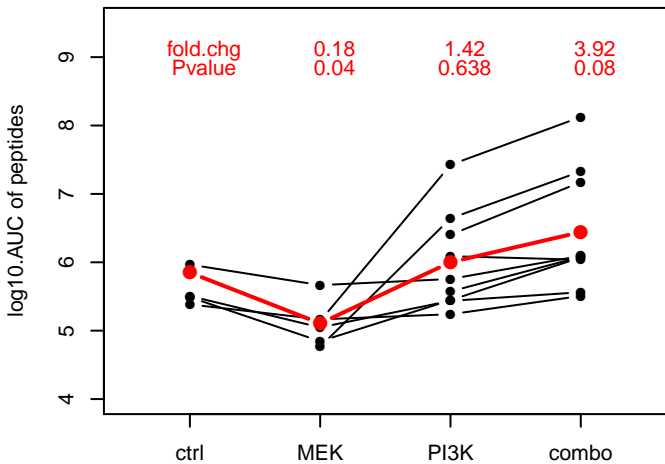

### LASP1\_HUMAN

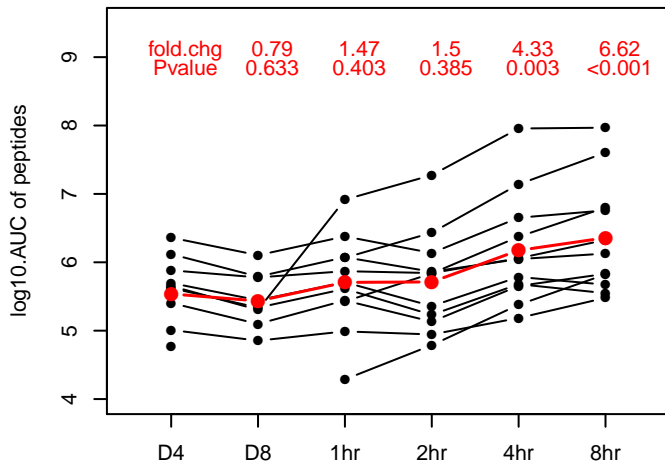

### LAT3\_HUMAN

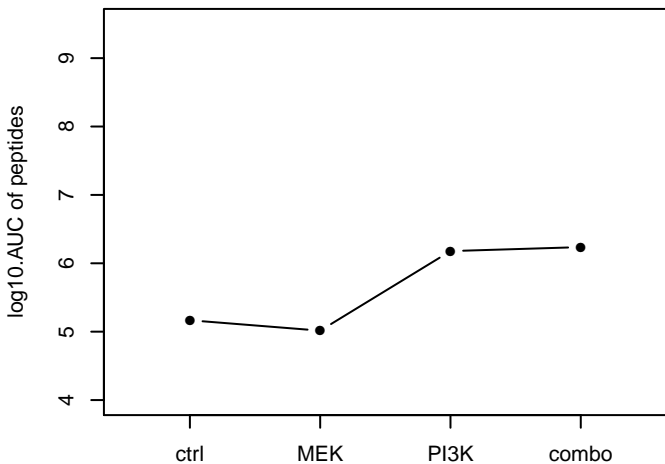

### LAT3\_HUMAN

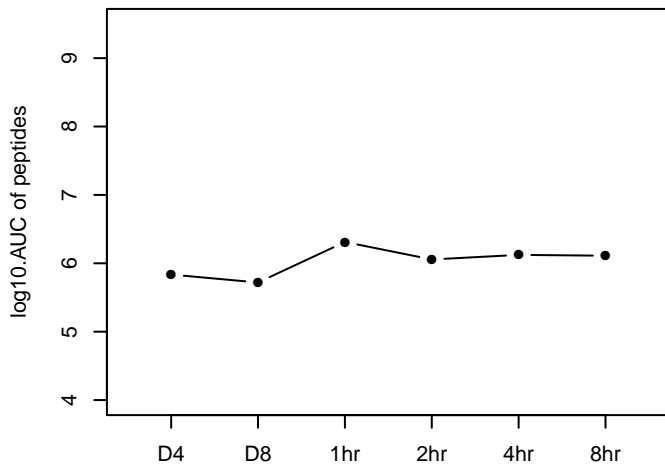

### LBR\_HUMAN

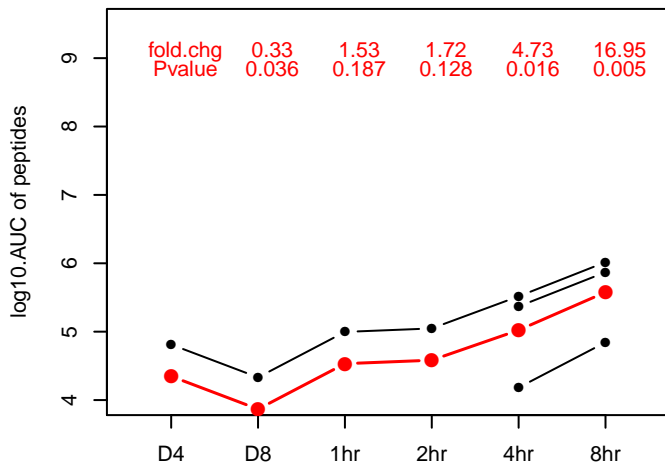

**LC7L3\_HUMAN**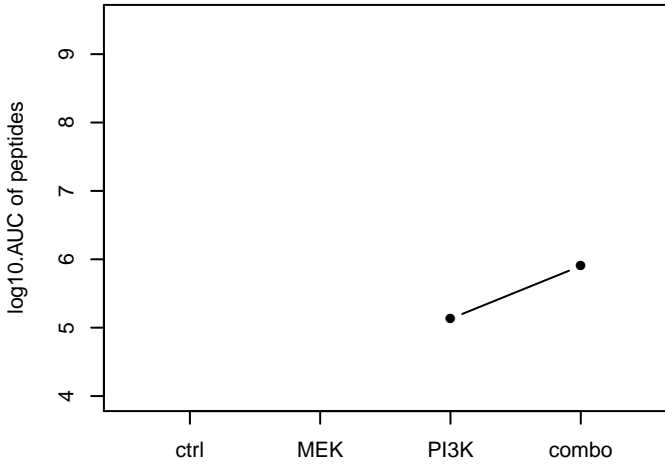**LC7L3\_HUMAN**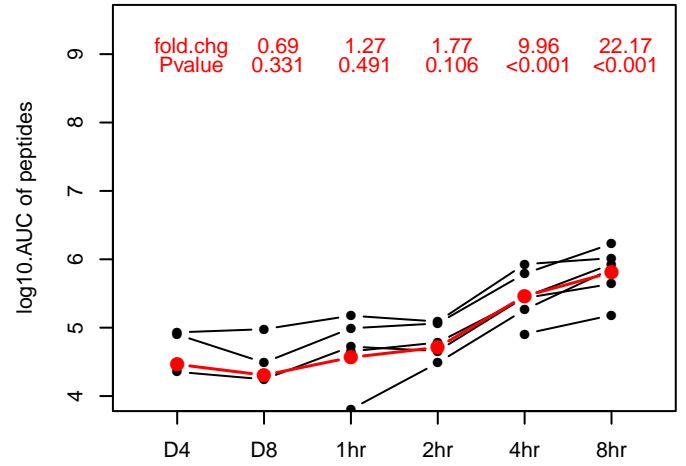**LIMA1\_HUMAN**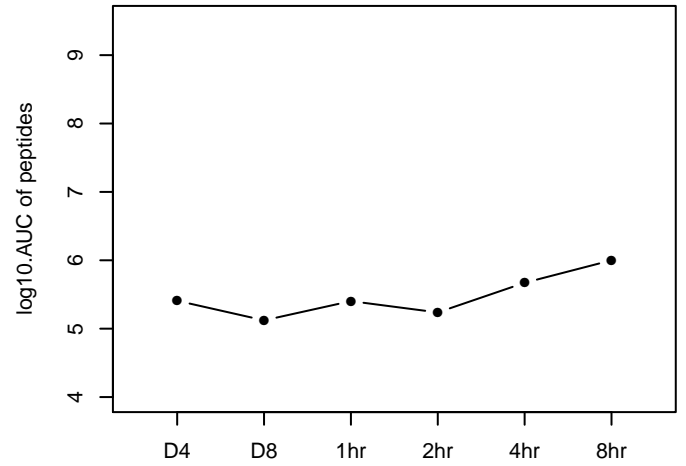**LIN9\_HUMAN**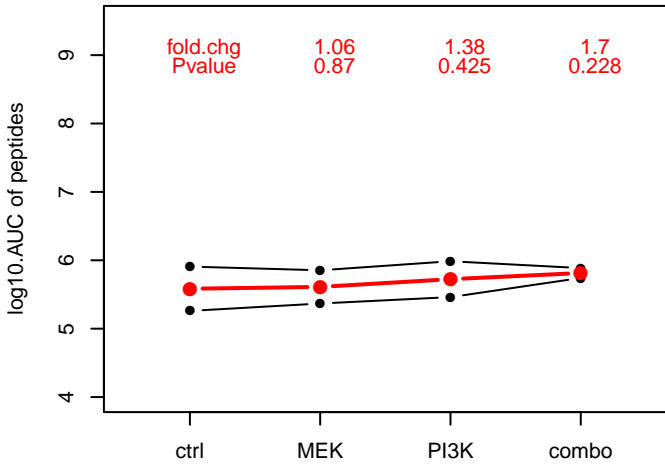**LIN9\_HUMAN**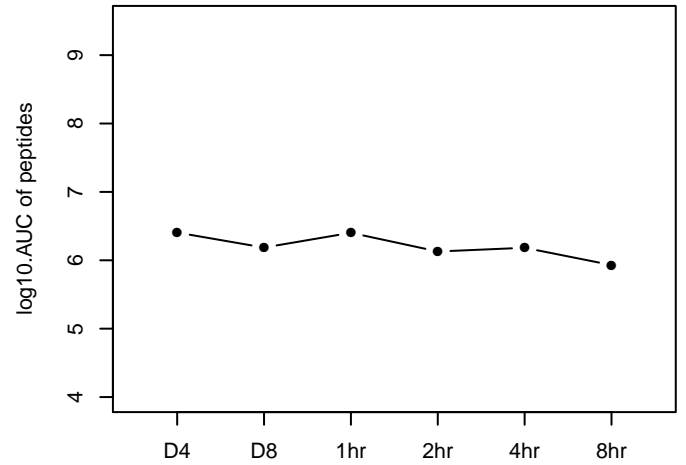

**LMAN1\_HUMAN**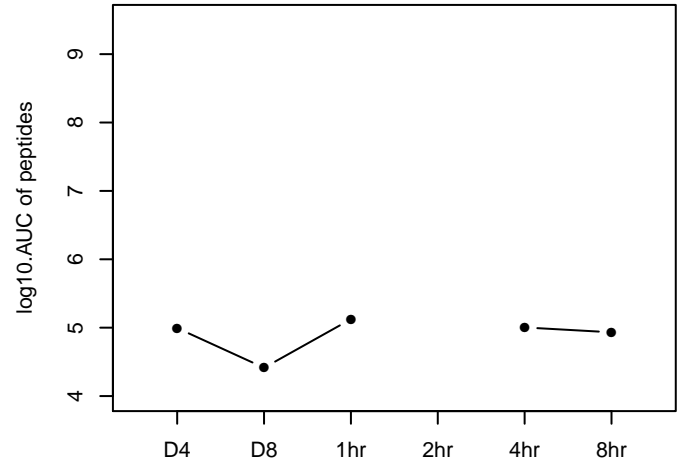**LMNA\_HUMAN**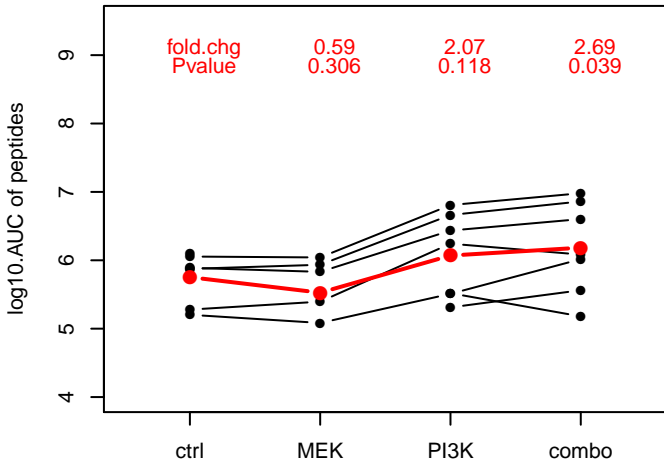**LMNA\_HUMAN**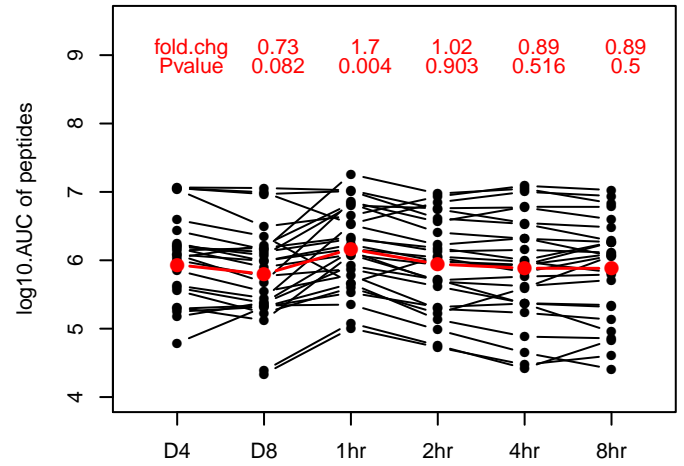**LMNB1\_HUMAN**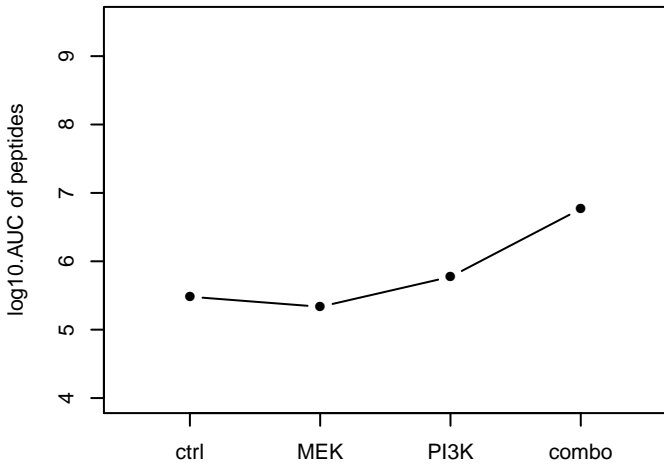**LMNB1\_HUMAN**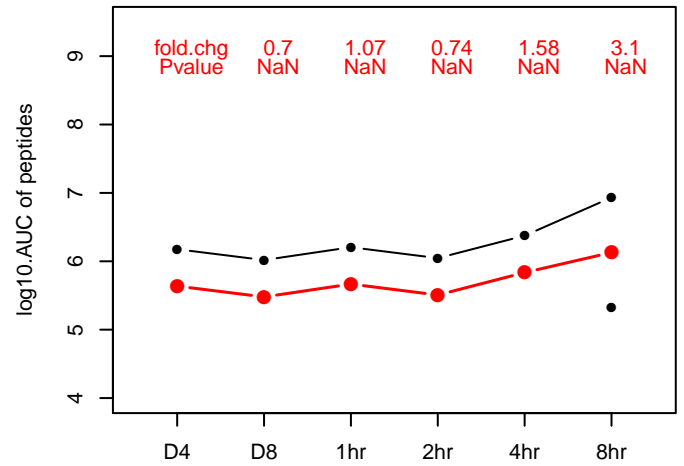

### LMO7\_HUMAN

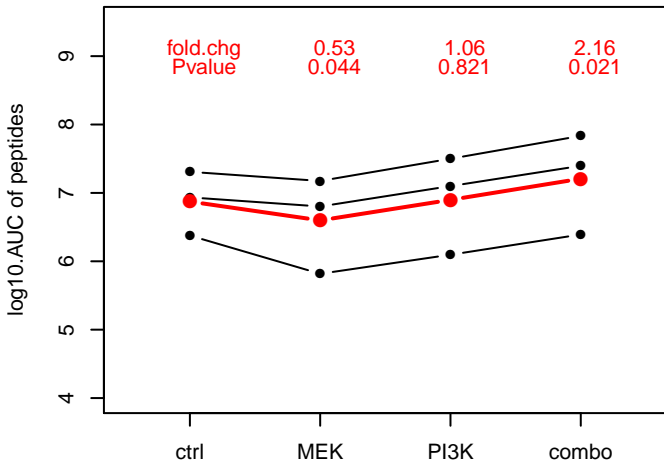

### LMO7\_HUMAN

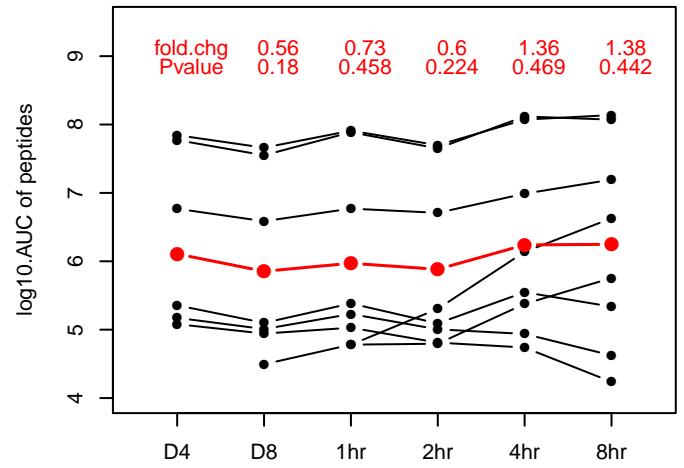

### LMTK2\_HUMAN

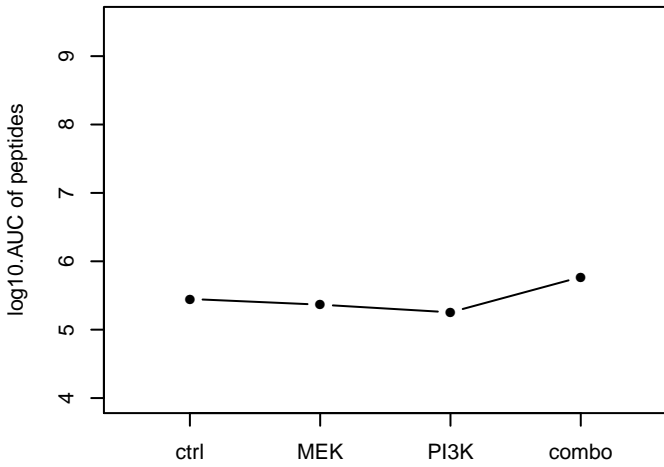

### LPAR3\_HUMAN

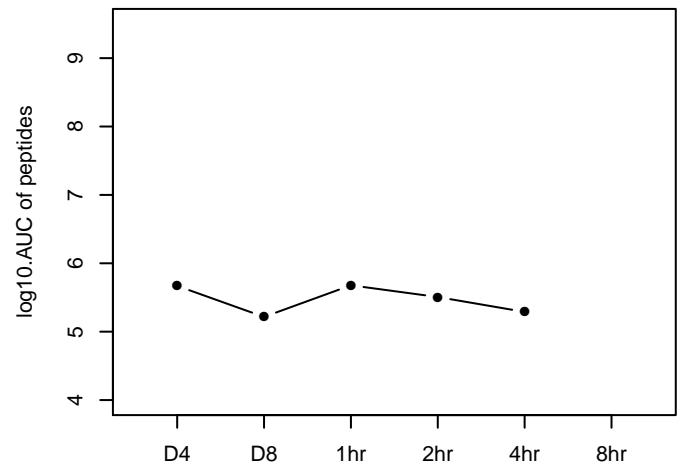

**LPIN1\_HUMAN**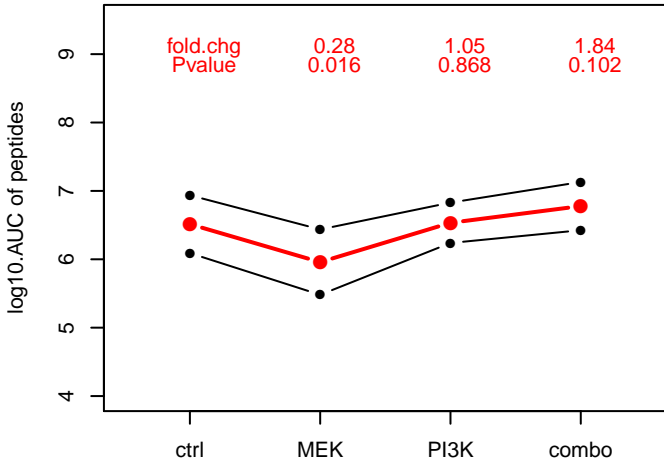**LPIN1\_HUMAN**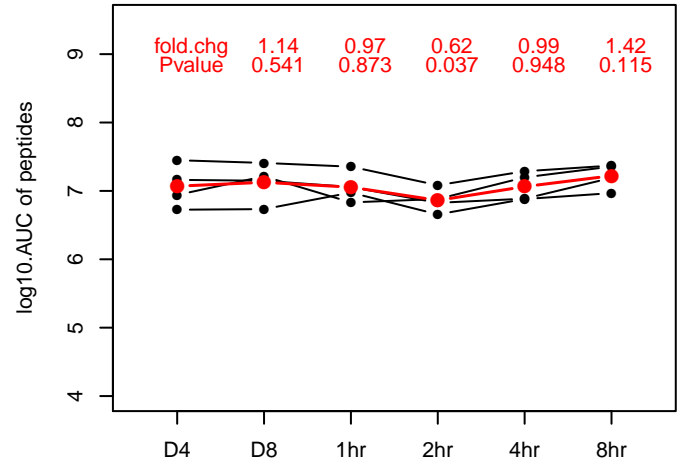**LRC41\_HUMAN**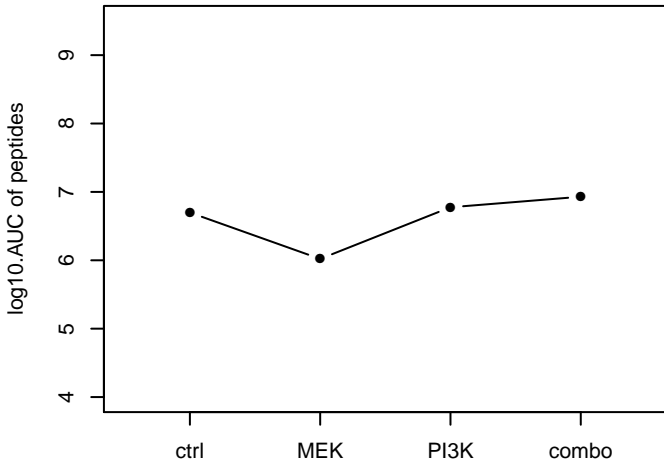**LRC41\_HUMAN**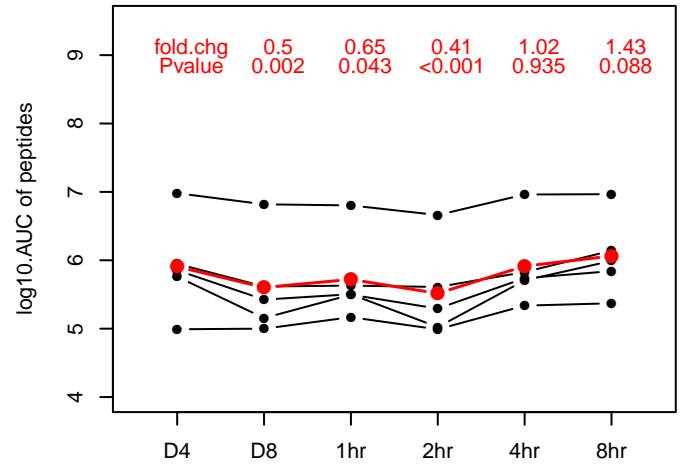**LRC45\_HUMAN**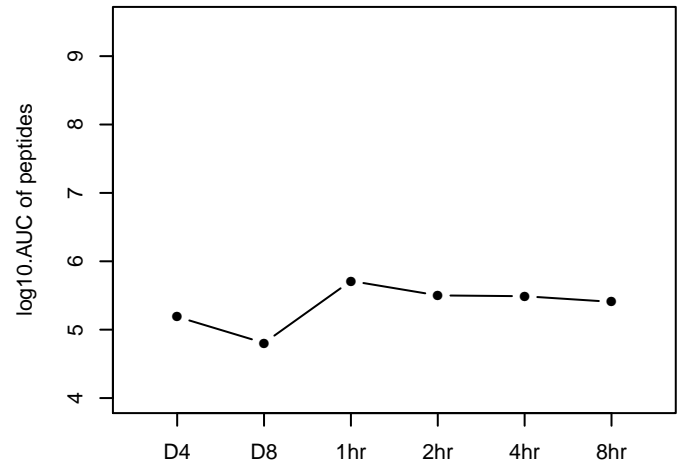



### LRC59\_HUMAN

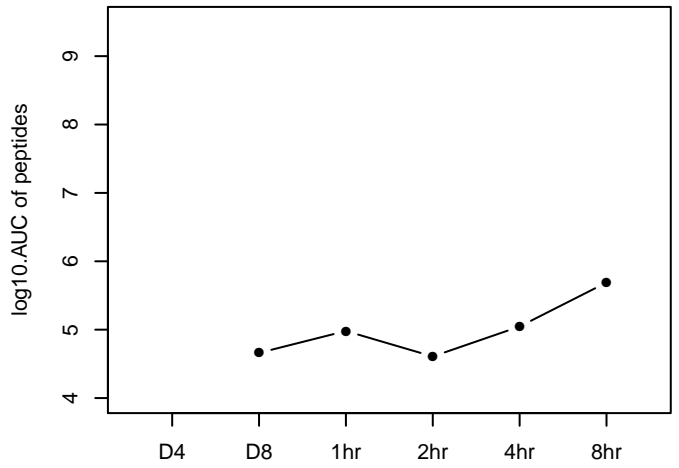

### LRCH3\_HUMAN

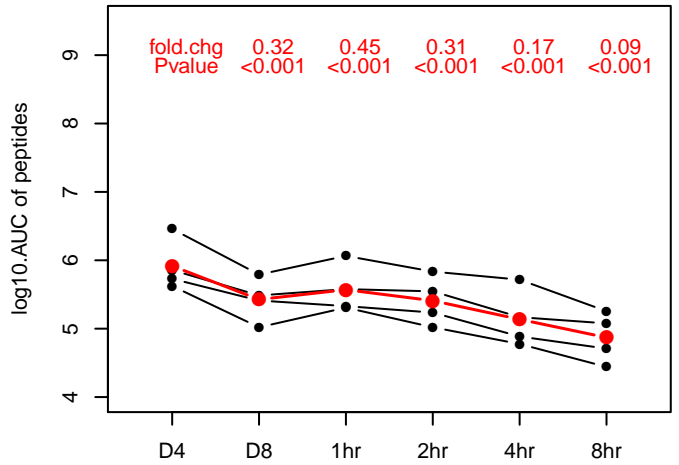

### LRRF1\_HUMAN

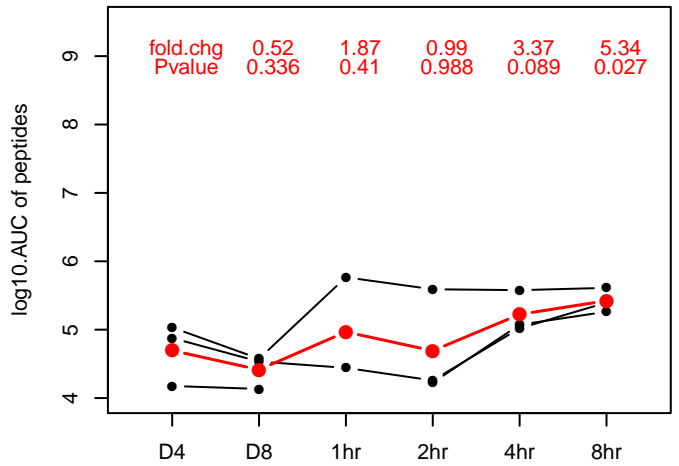

**LS14A\_HUMAN**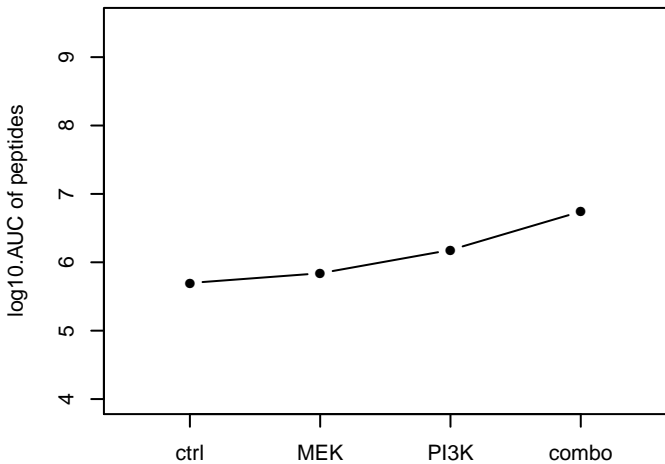**LS14A\_HUMAN**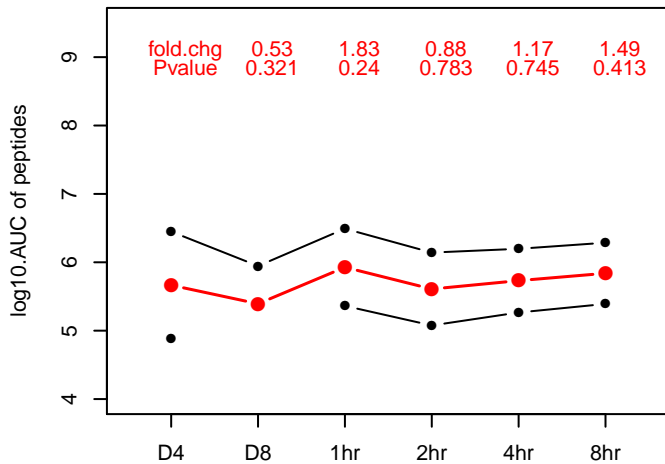**LSM11\_HUMAN**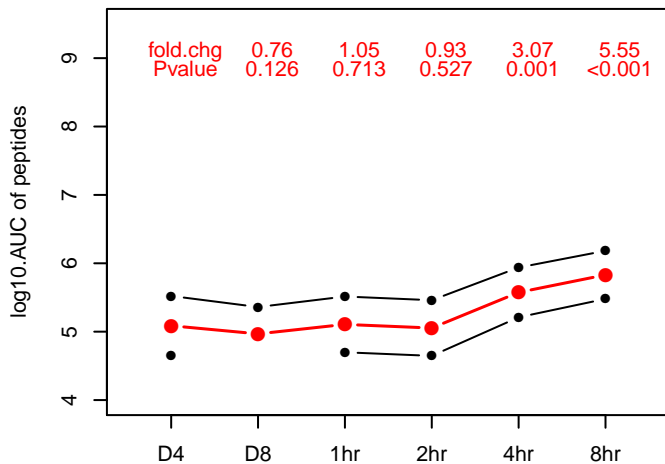**LSM2\_HUMAN**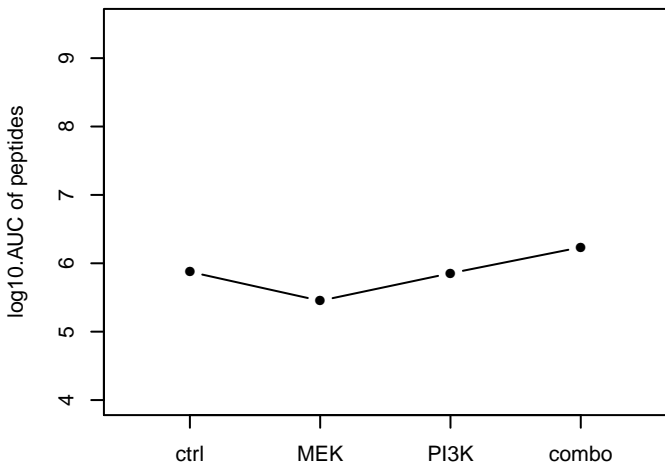**LSM2\_HUMAN**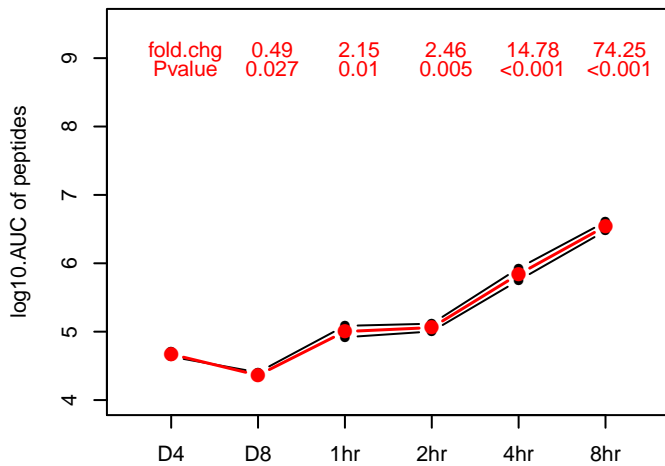

**LYRIC\_HUMAN**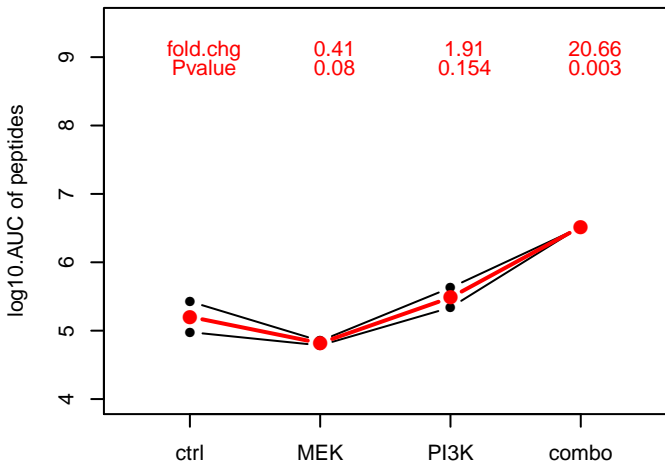**LYRIC\_HUMAN**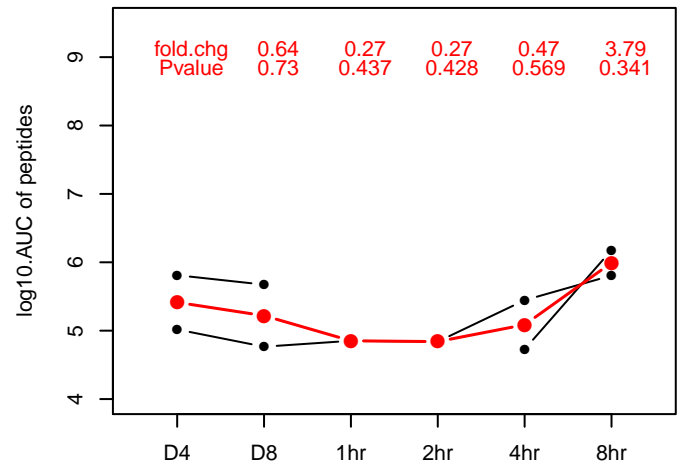**LYST\_HUMAN**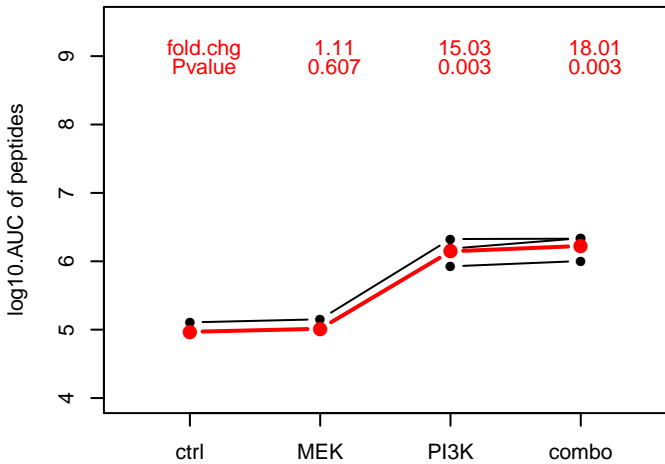**LYST\_HUMAN**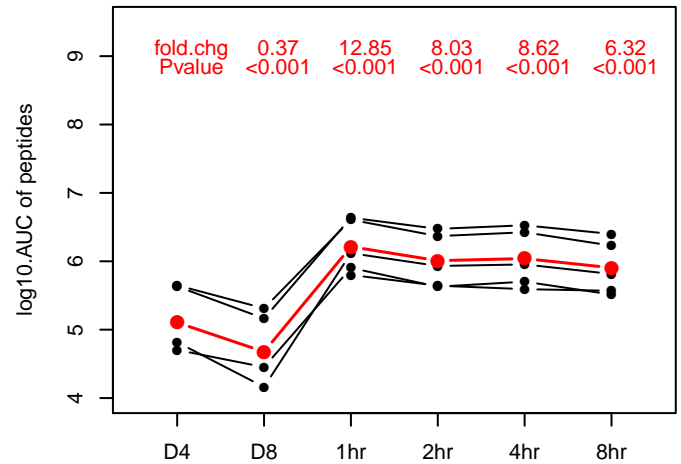**LZTS1\_HUMAN**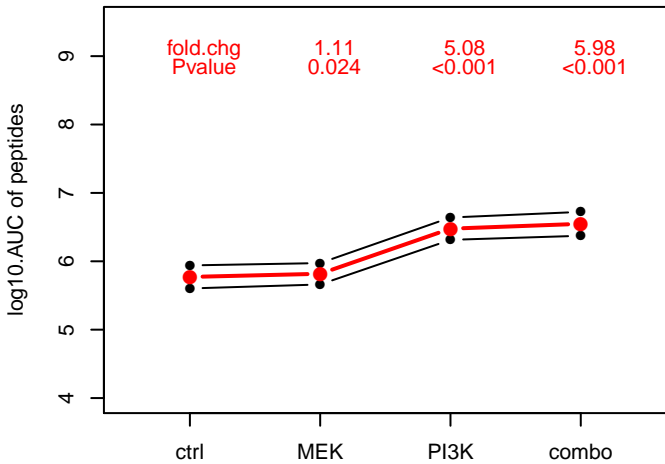**LZTS1\_HUMAN**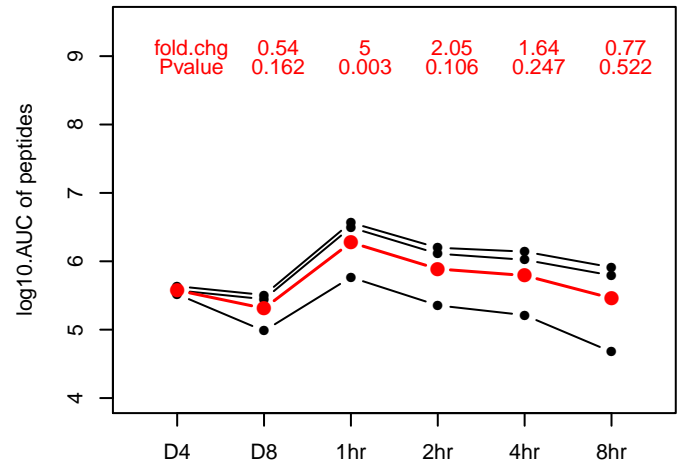

### M21D1\_HUMAN

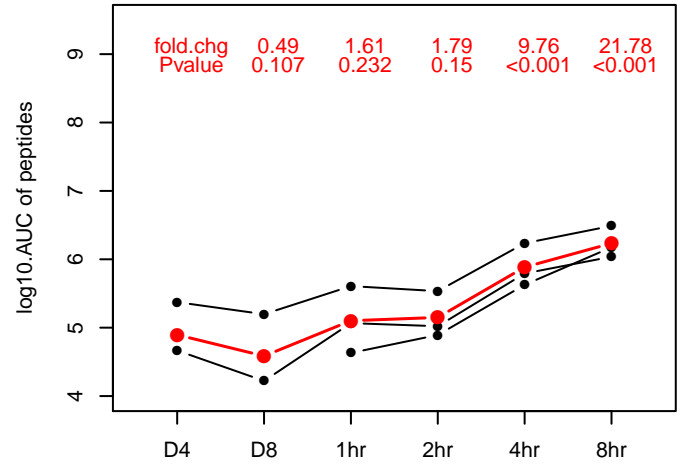

### MACF1\_HUMAN

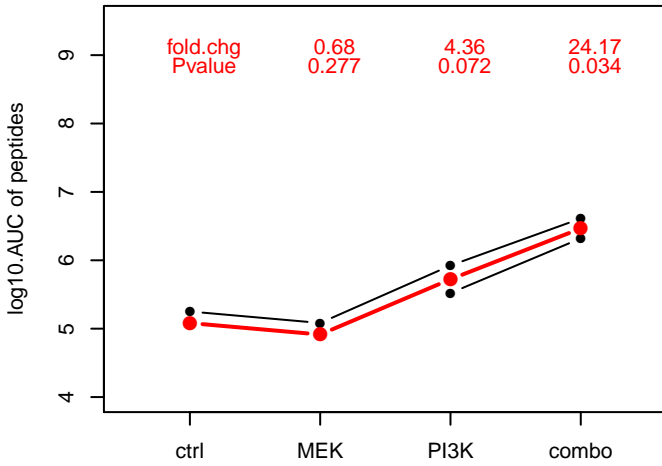

### MACF1\_HUMAN

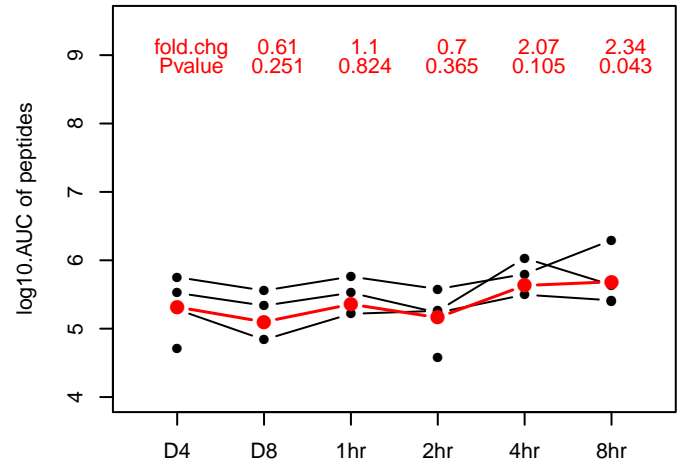

### MAF1\_HUMAN

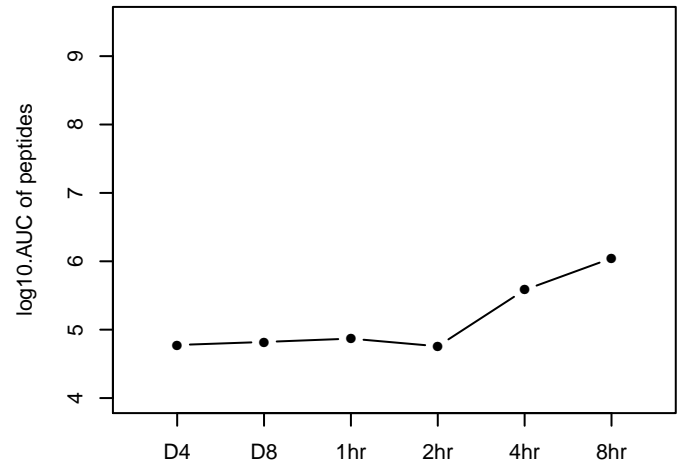

### MAGD2\_HUMAN

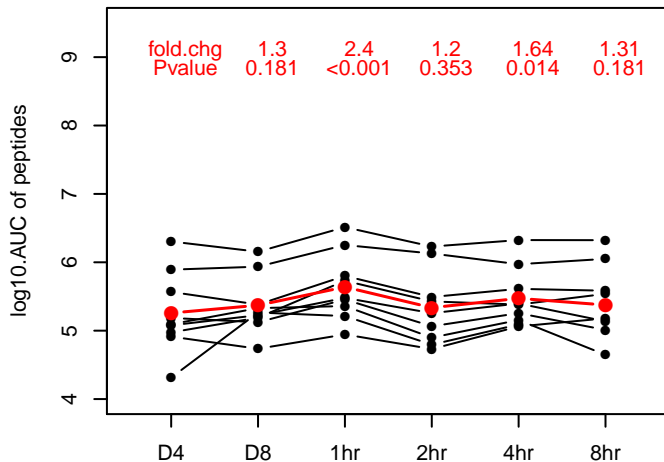

### MAP1B\_HUMAN

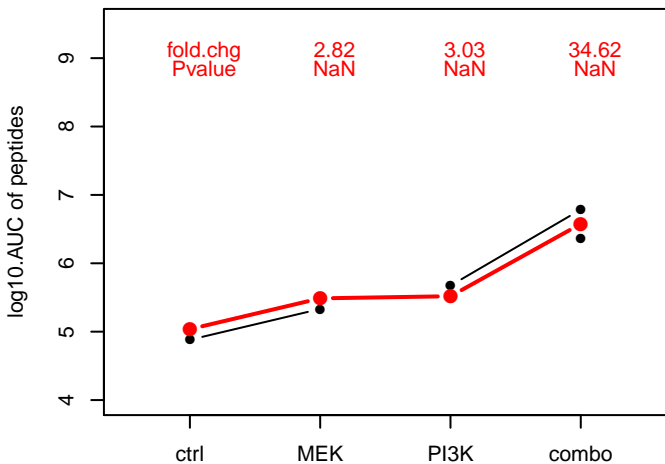

### MAP1B\_HUMAN

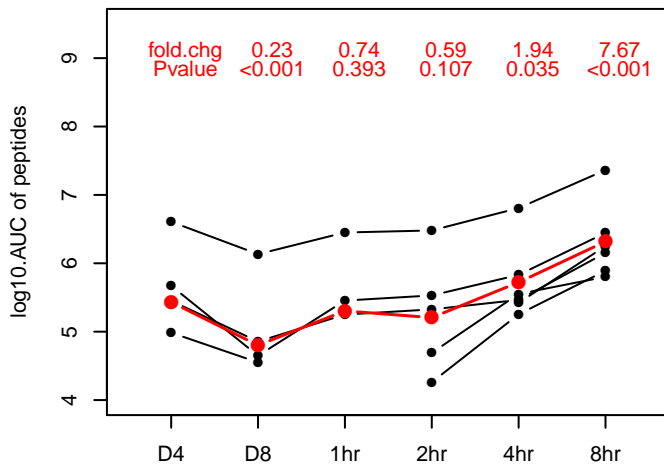

### MAP1S\_HUMAN

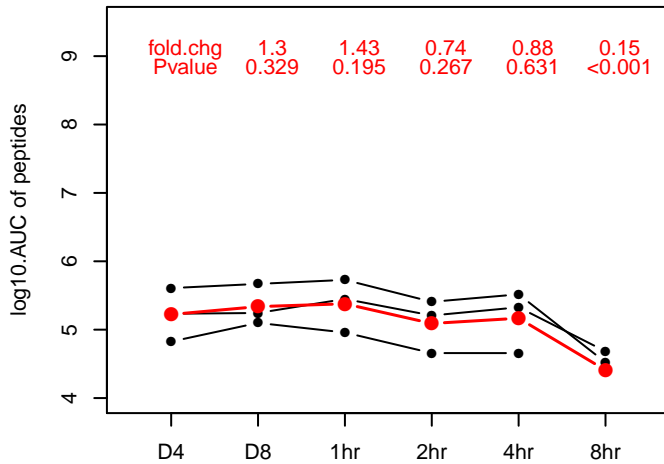

### MAP4\_HUMAN

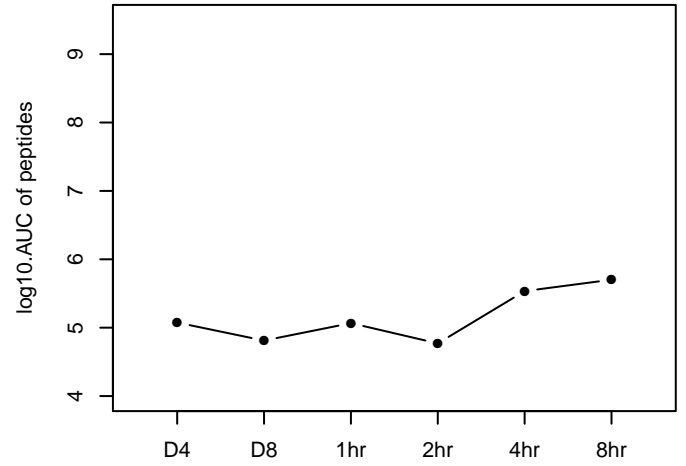

### MARE1\_HUMAN

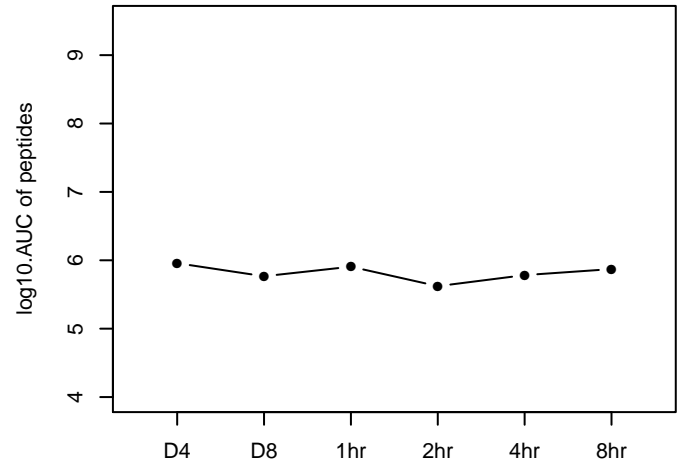

### MAST2\_HUMAN

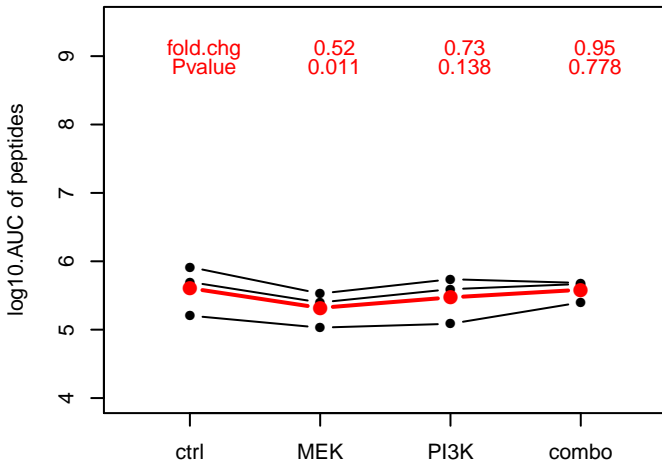

### MAST2\_HUMAN

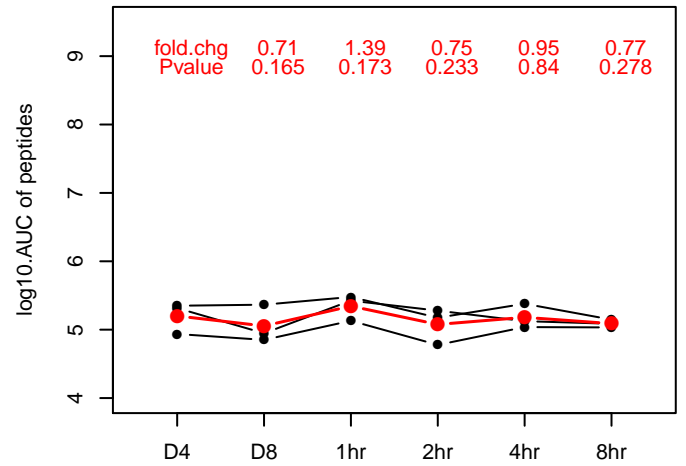

### MAT2B\_HUMAN

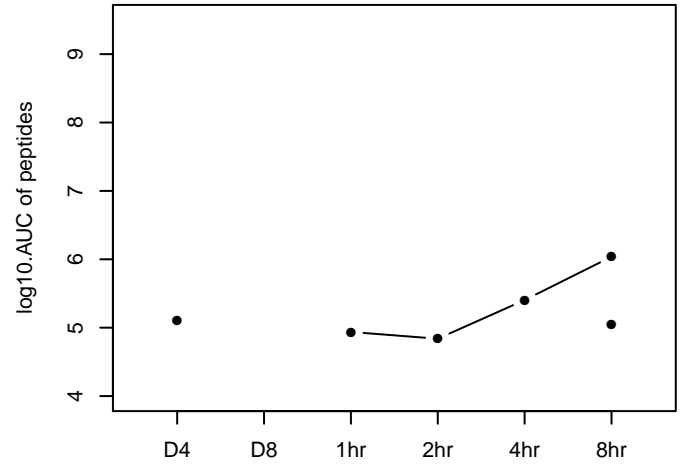

### MATR3\_HUMAN

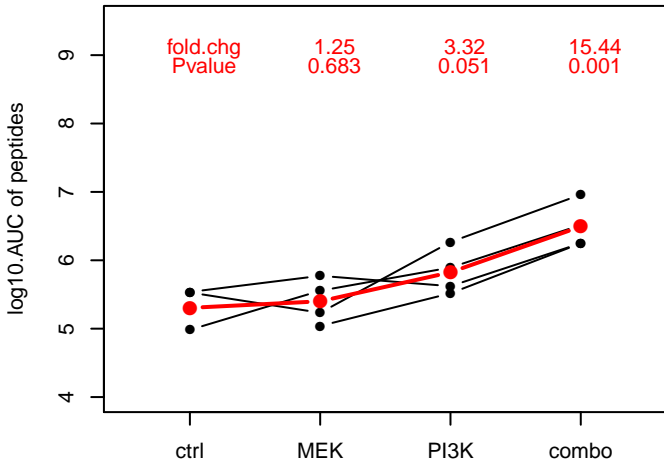

### MATR3\_HUMAN

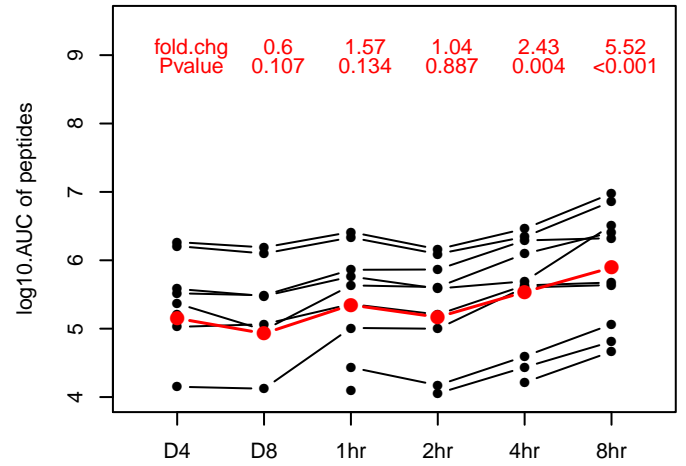

### MBB1A\_HUMAN

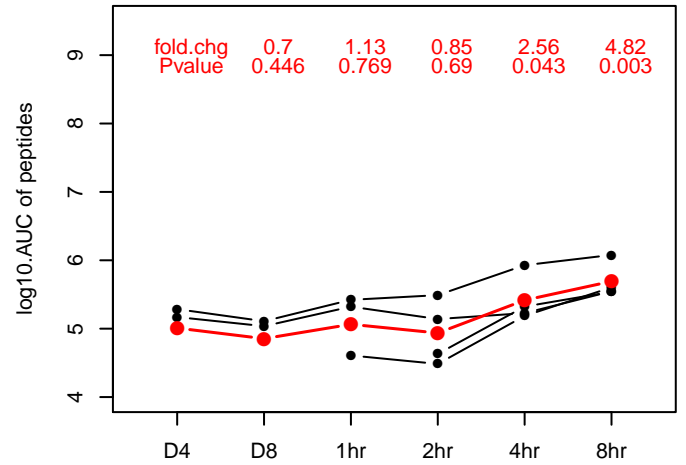

**MBD1\_HUMAN**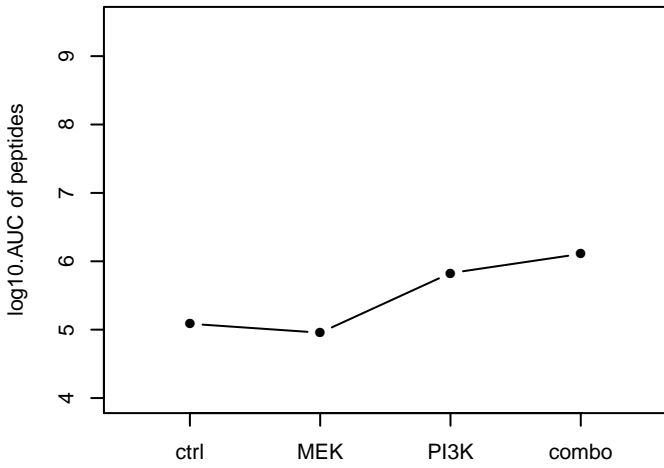**MBD1\_HUMAN**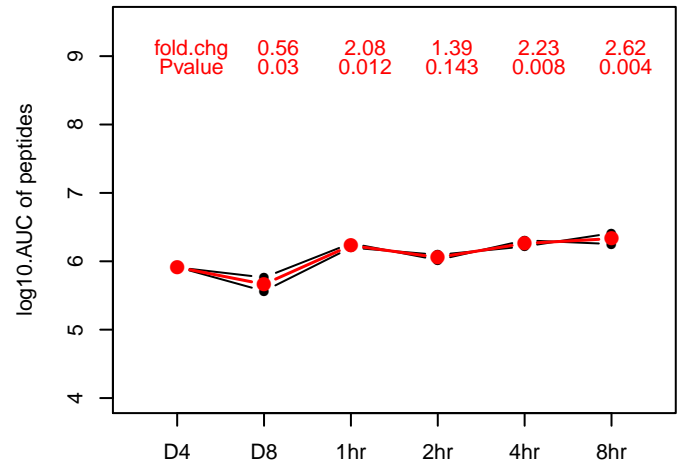**MCM2\_HUMAN**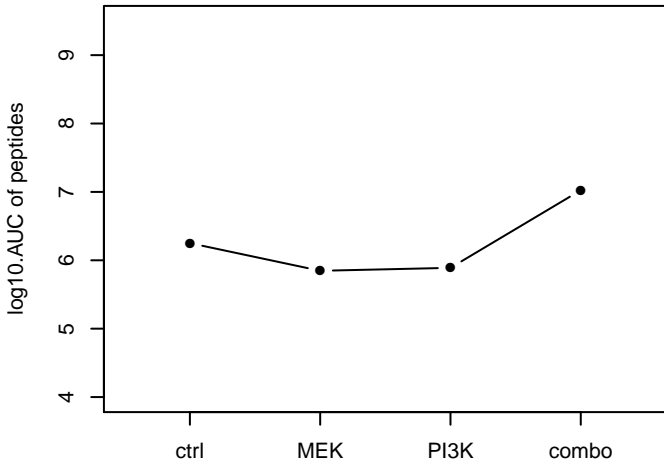**MCM2\_HUMAN**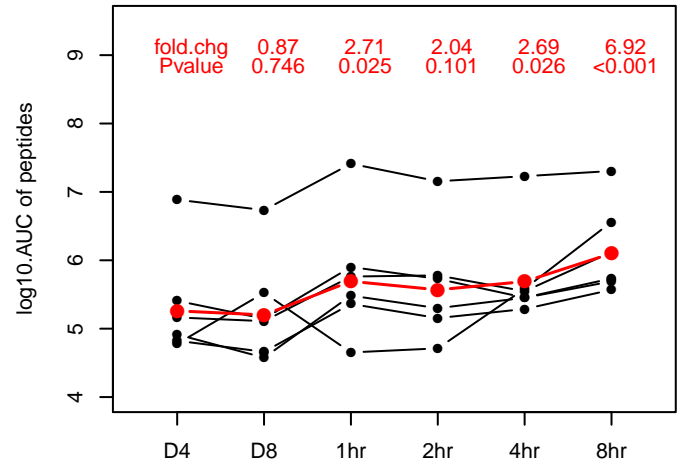**MCM5\_HUMAN**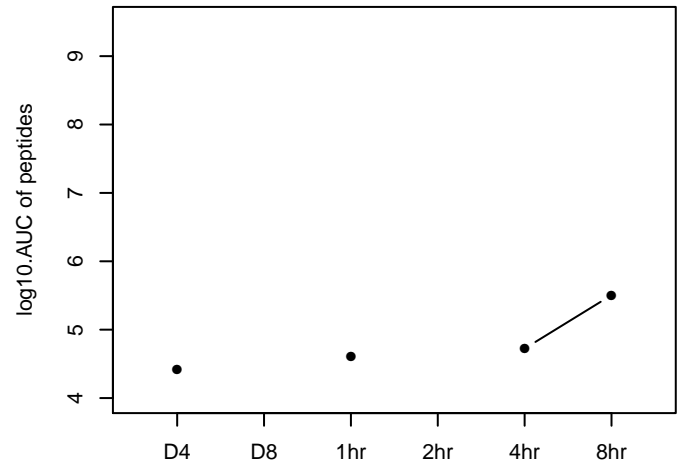



### MD2BP\_HUMAN

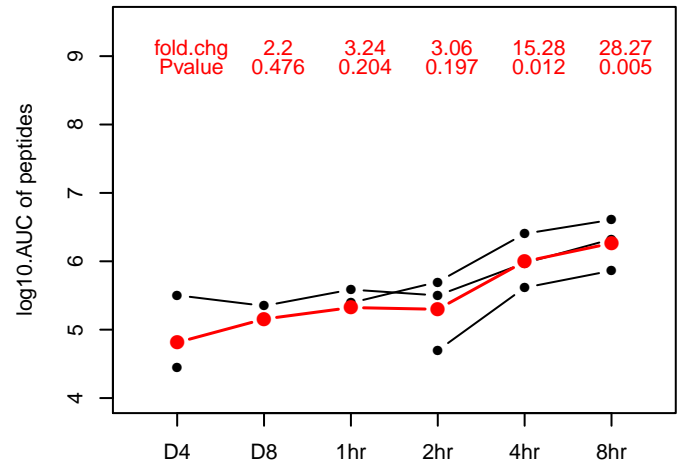

### MDC1\_HUMAN

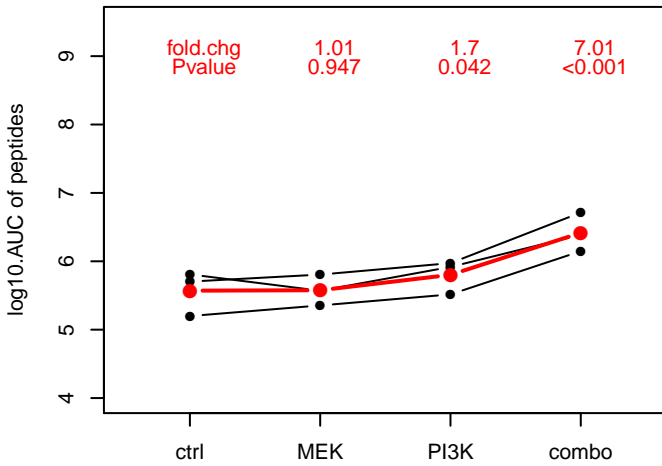

### MDC1\_HUMAN

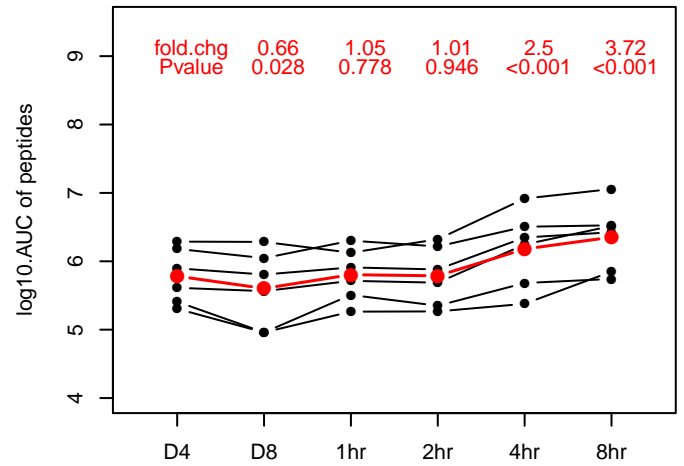

### MED1\_HUMAN

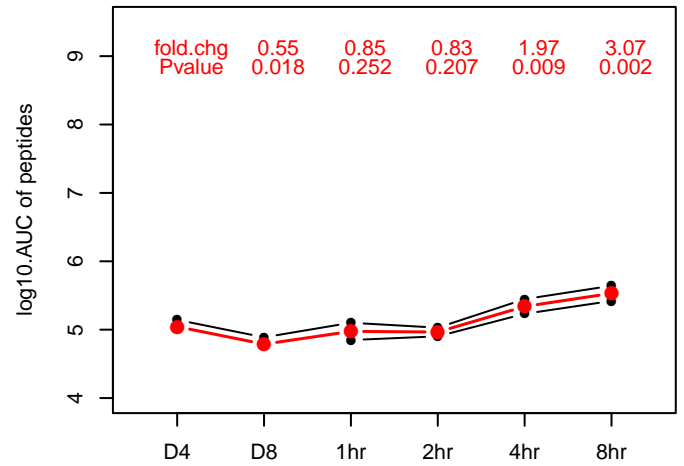

### MED13\_HUMAN

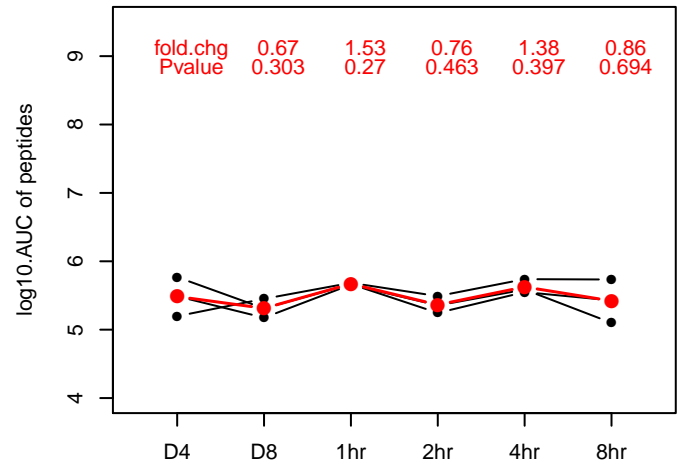

### MIB1\_HUMAN

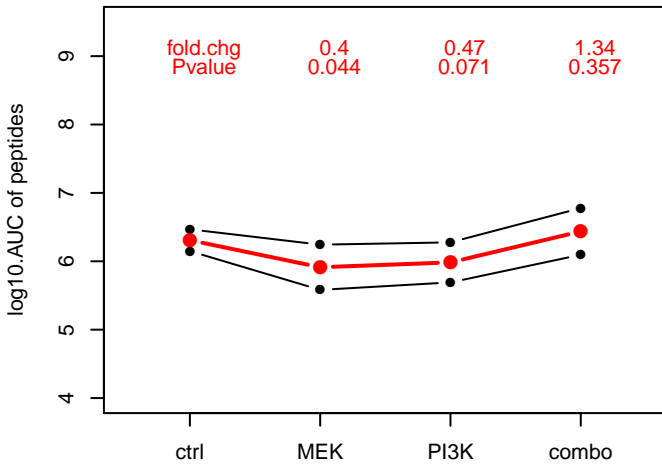

### MIB1\_HUMAN

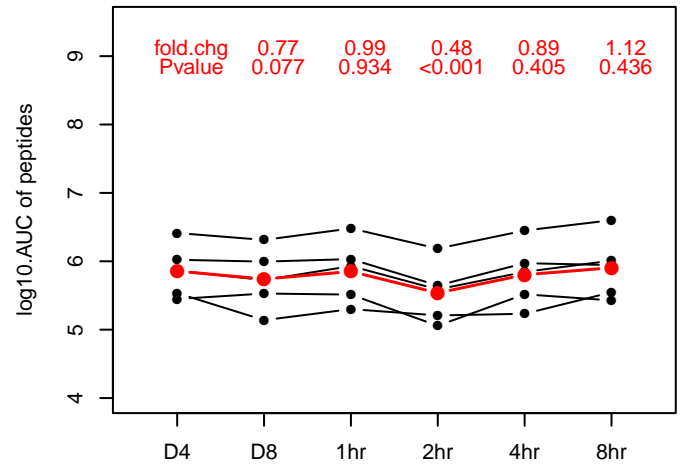

### MICA1\_HUMAN

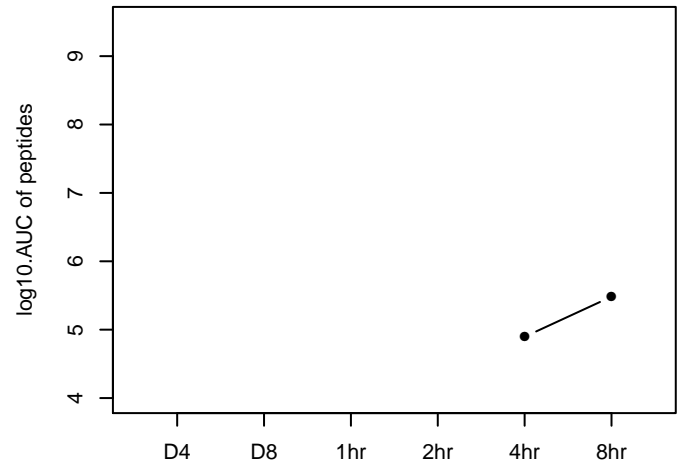

**MICA3\_HUMAN**

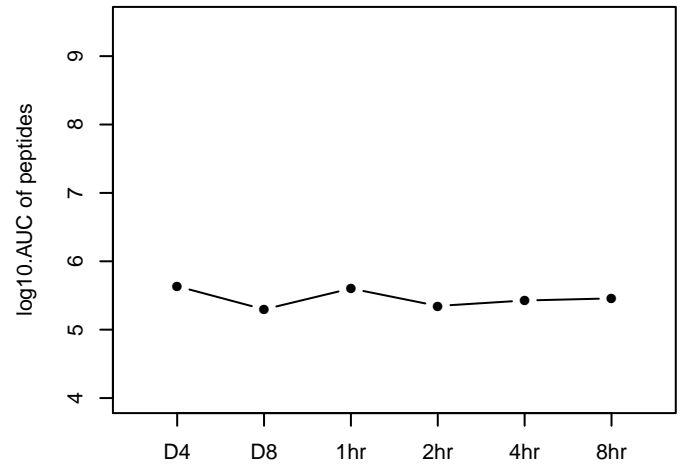

**MINT\_HUMAN**

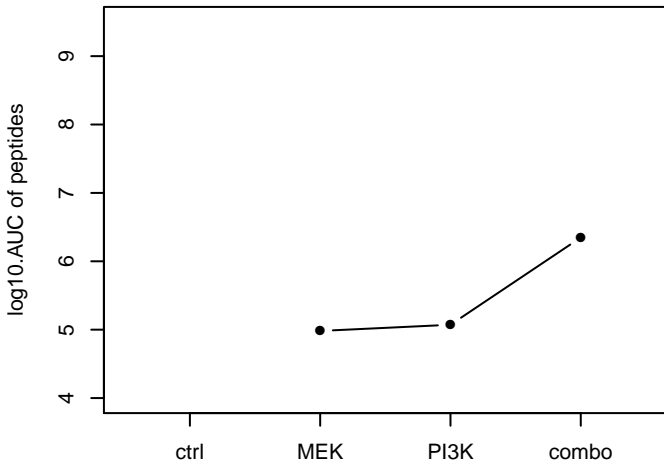

**MK04\_HUMAN**

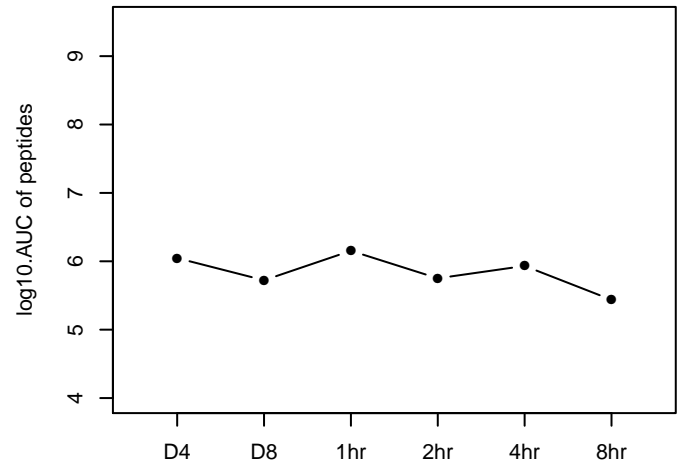

### MK67I\_HUMAN

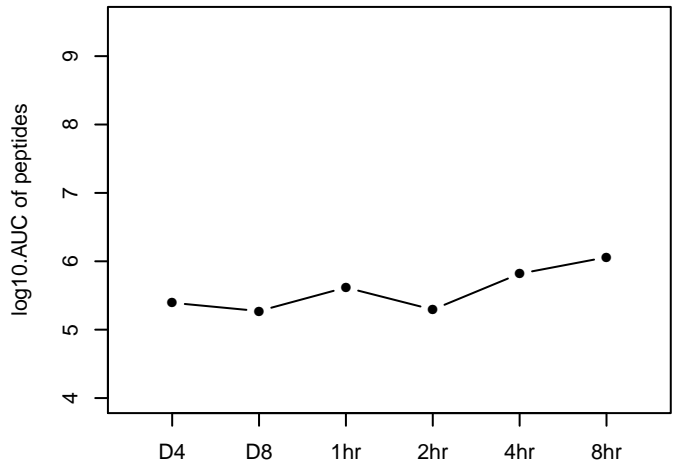

### MLL1\_HUMAN

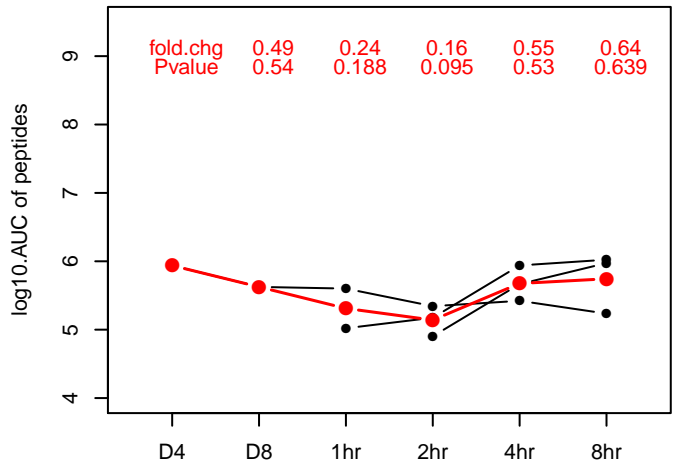

### MOES\_HUMAN

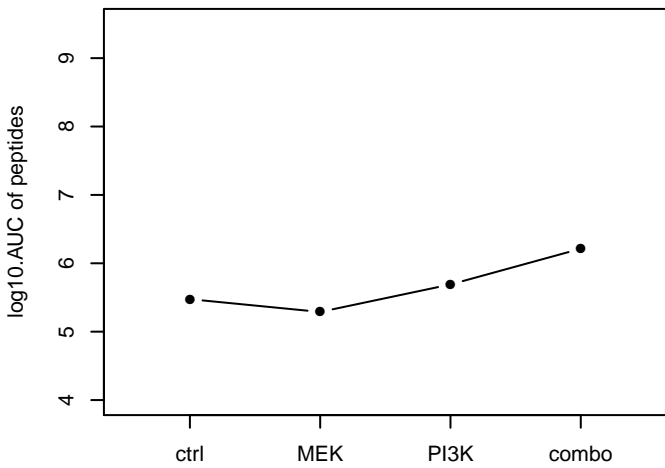

### MOES\_HUMAN

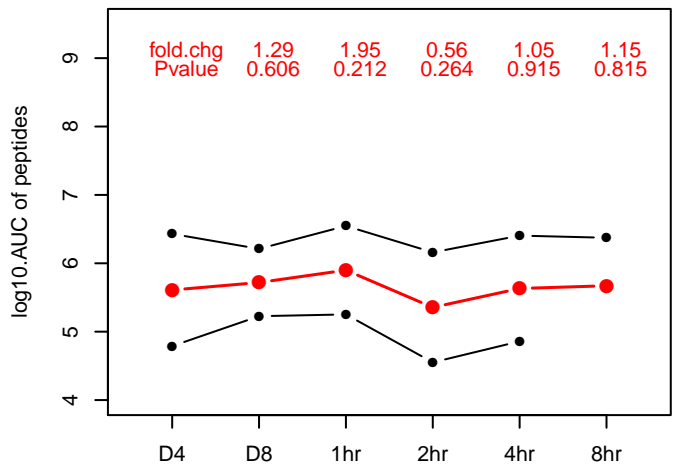

### MORC3\_HUMAN

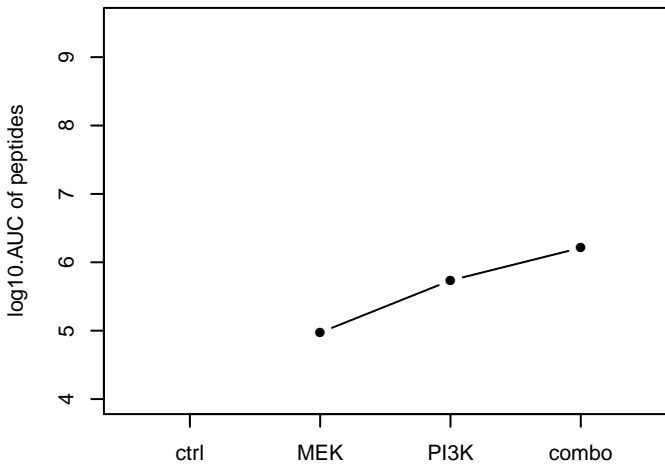

### MORC3\_HUMAN

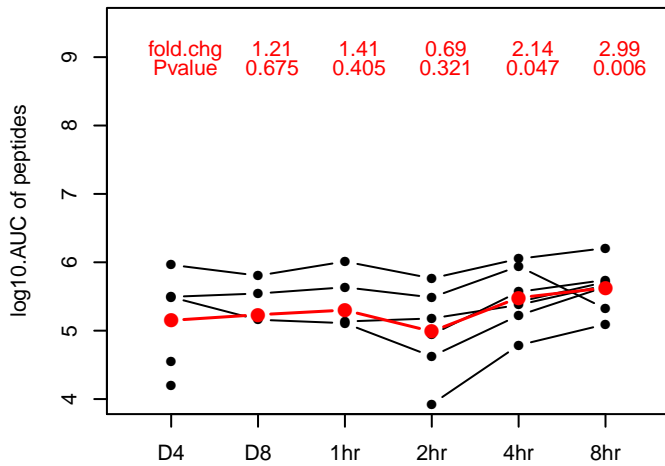

### MOV10\_HUMAN

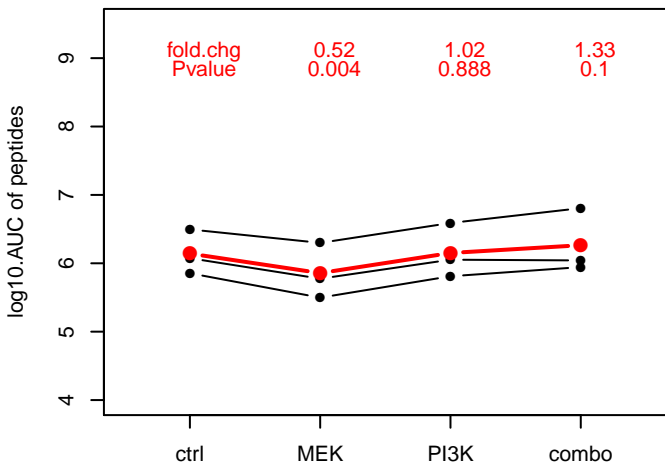

### MOV10\_HUMAN

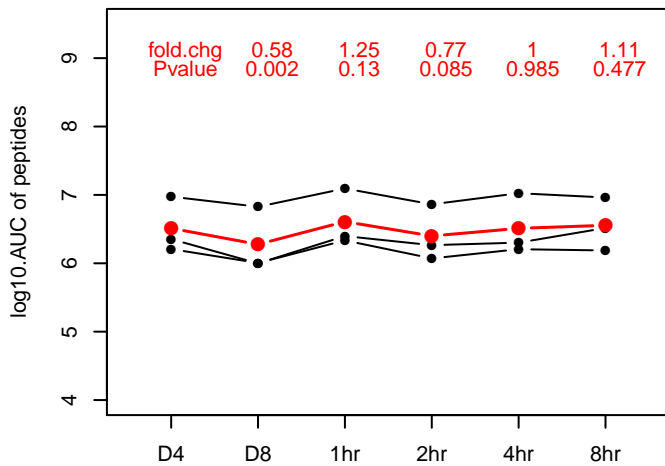

### MPDZ\_HUMAN

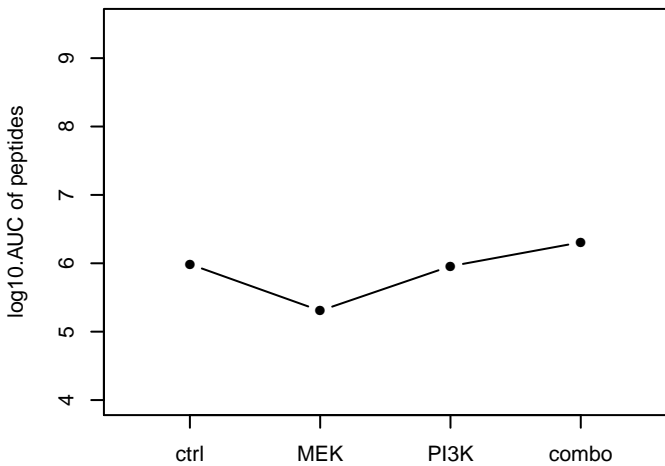

### MPDZ\_HUMAN

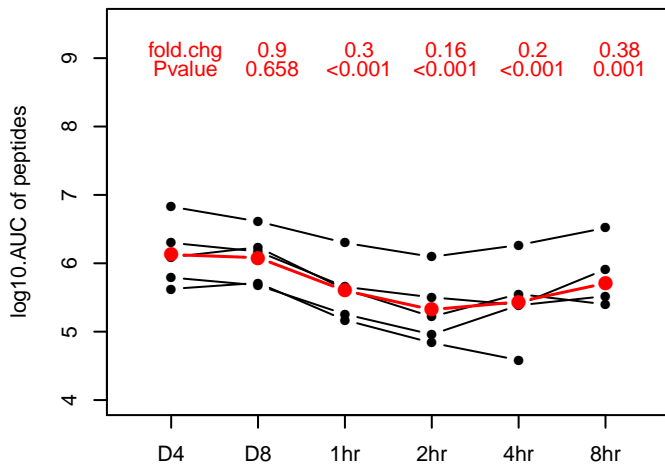

**MRE11\_HUMAN**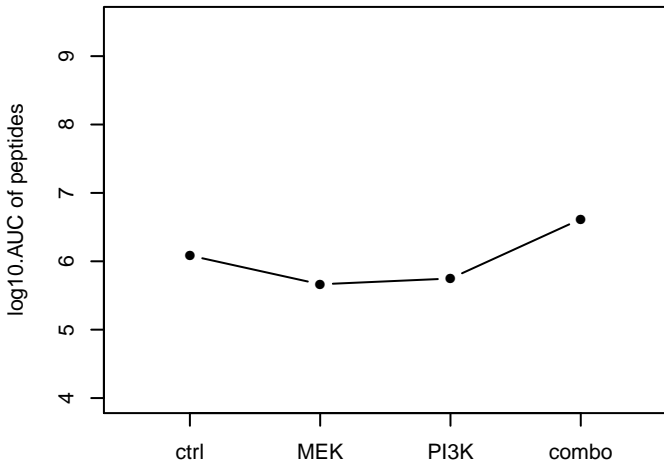**MRE11\_HUMAN**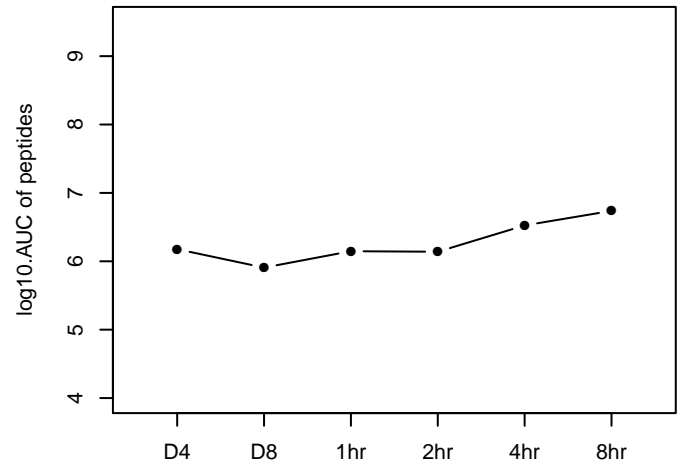**MSH3\_HUMAN**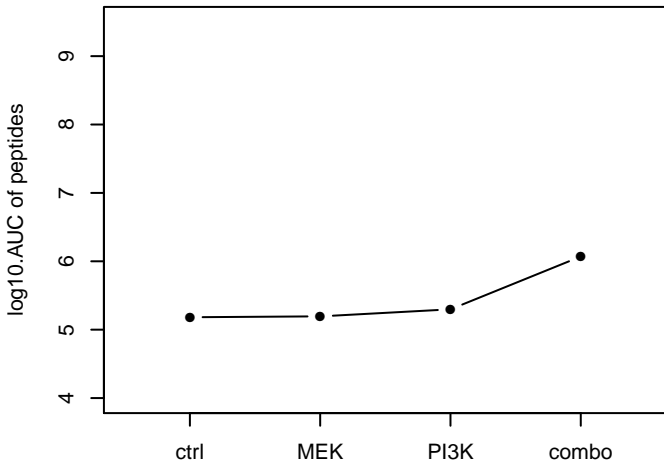**MSH6\_HUMAN**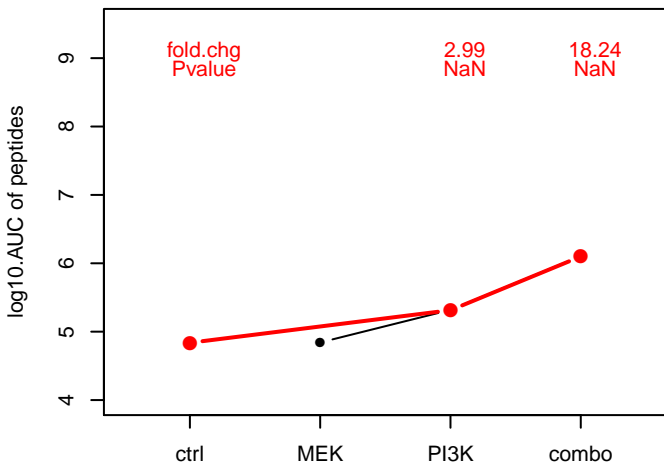**MSH6\_HUMAN**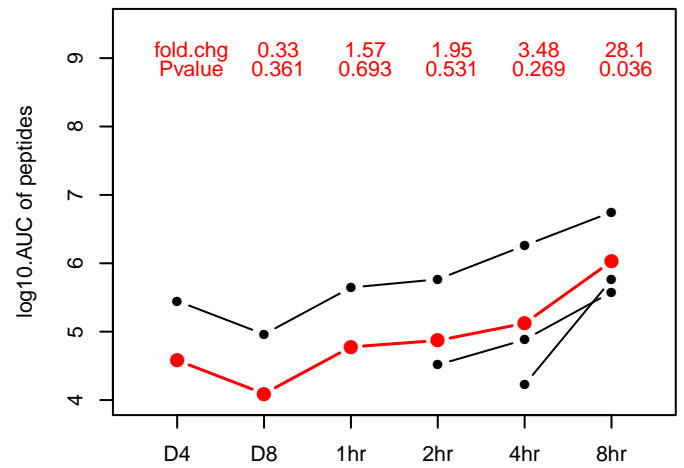

### MST4\_HUMAN

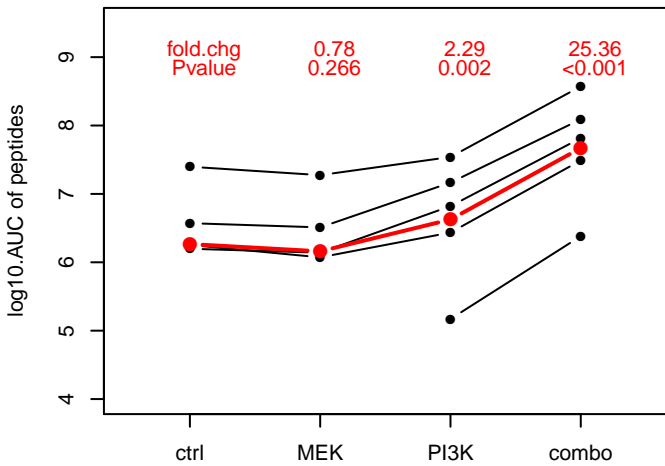

### MST4\_HUMAN

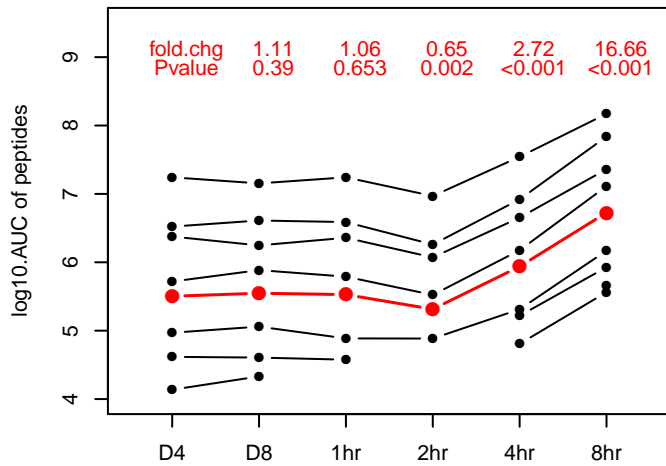

### MTL2B\_HUMAN

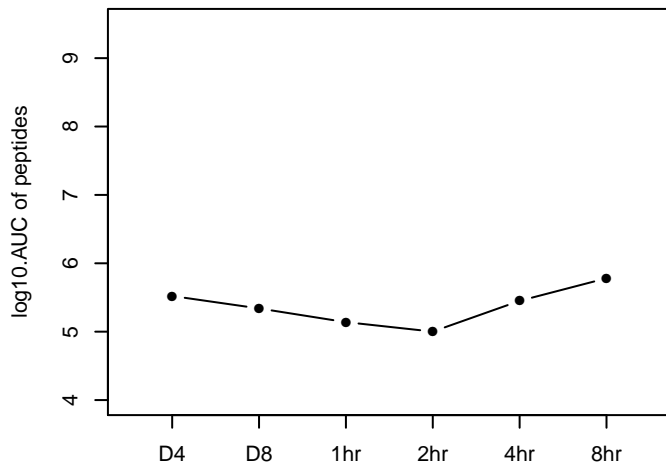

### MTUS1\_HUMAN

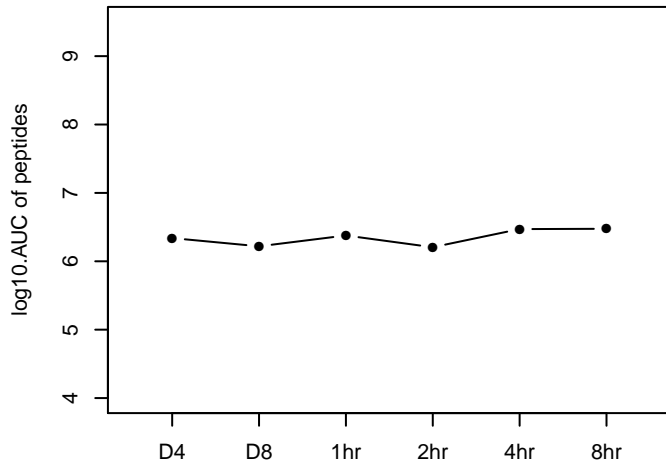

**MY18A\_HUMAN**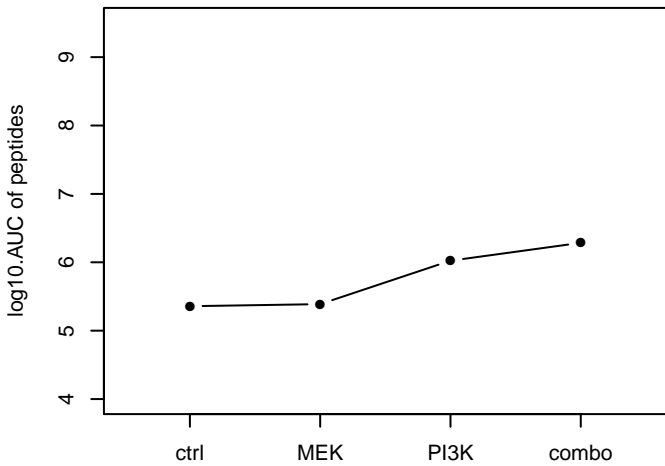**MY18A\_HUMAN**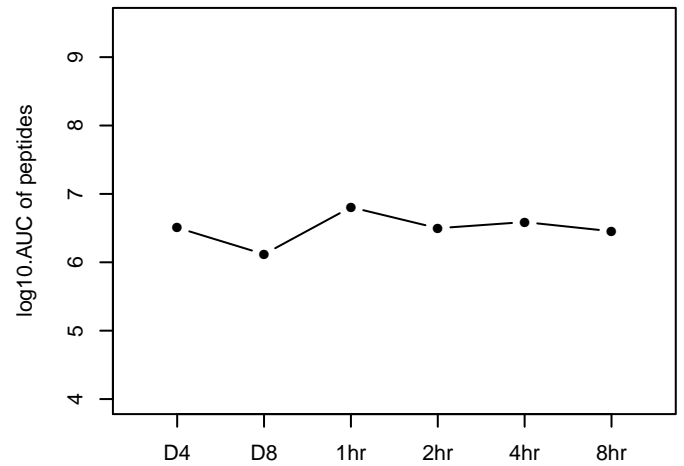**MYH10\_HUMAN**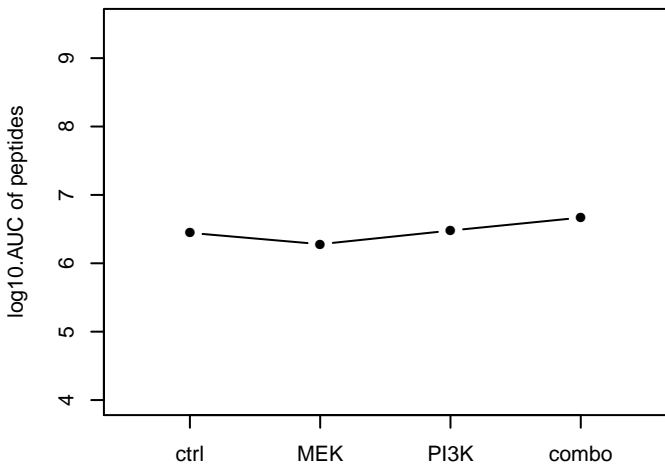**MYH10\_HUMAN**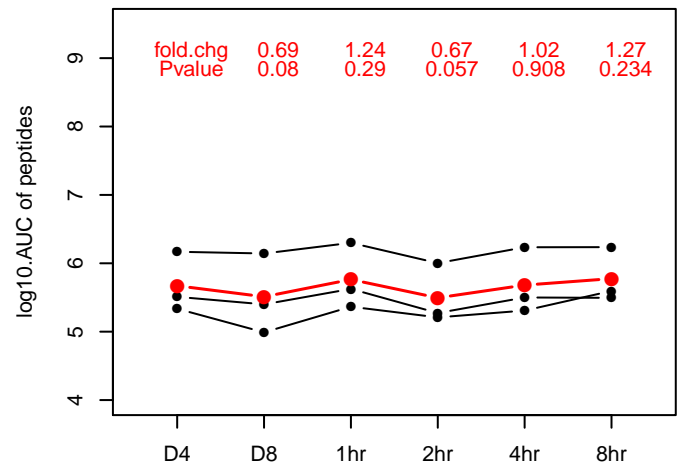**MYH9\_HUMAN**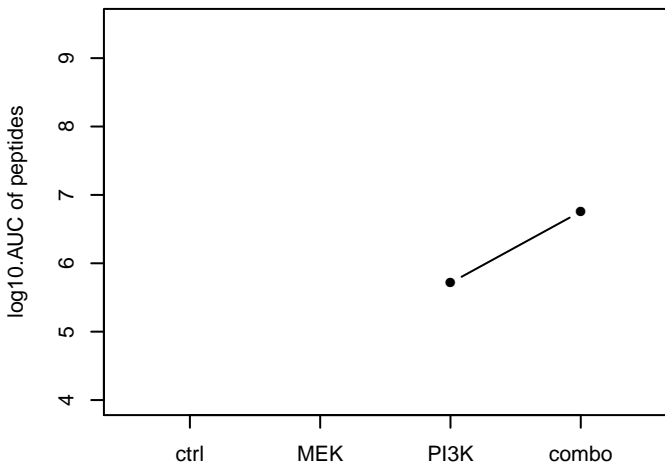**MYH9\_HUMAN**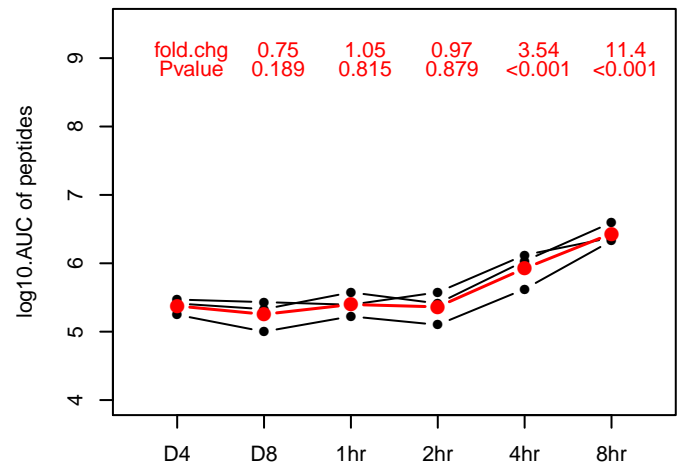



### MYLK\_HUMAN

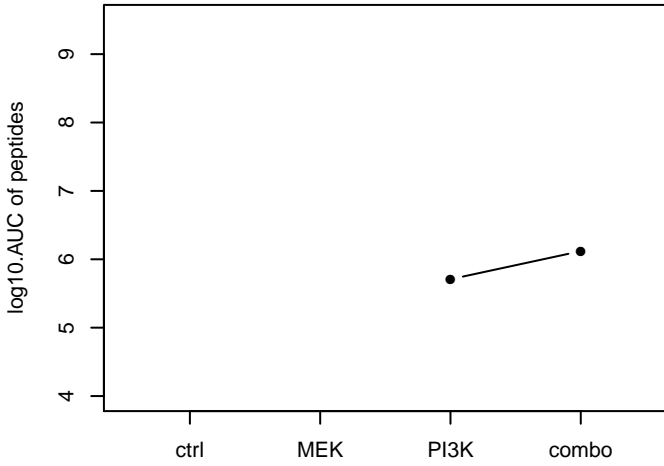

### MYLK\_HUMAN

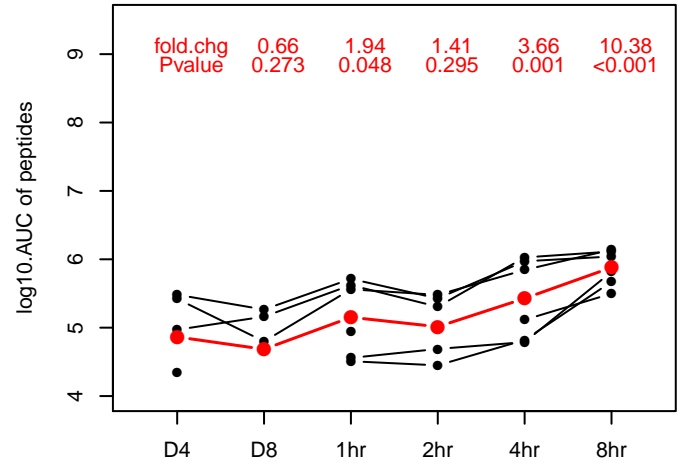

### MYO1E\_HUMAN

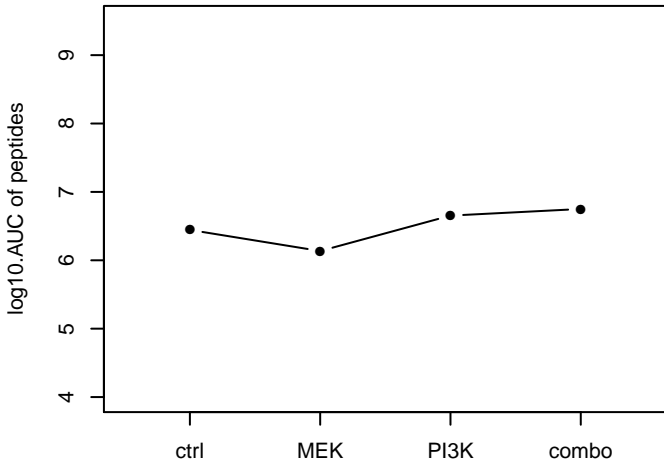

### MYO1E\_HUMAN

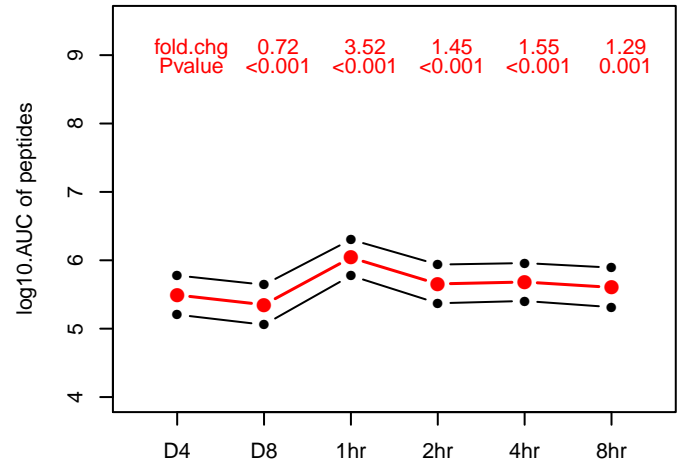

### MYO9B\_HUMAN

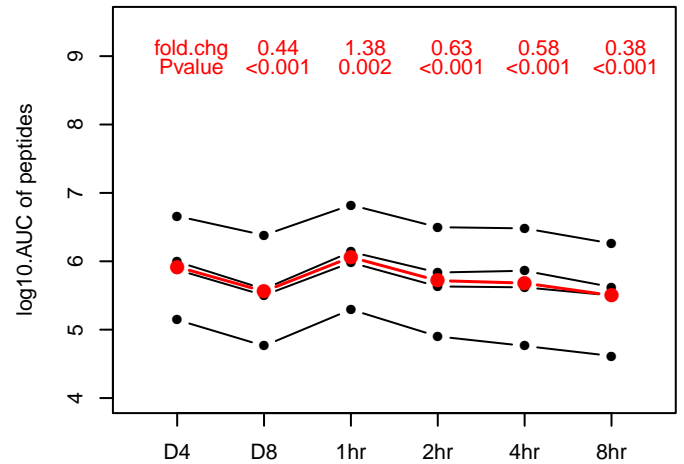

**MYOF\_HUMAN**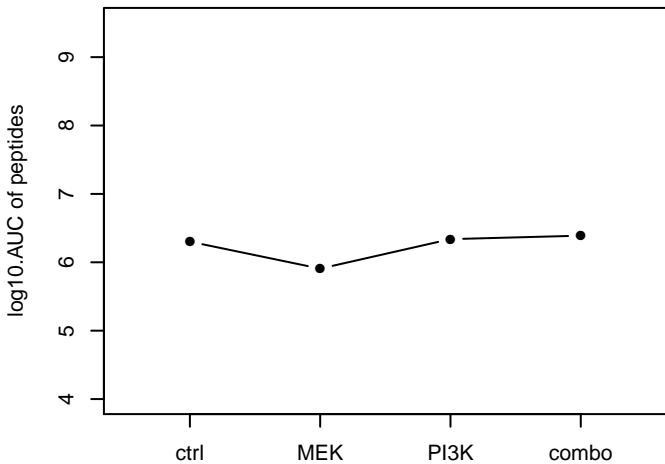**MYOF\_HUMAN**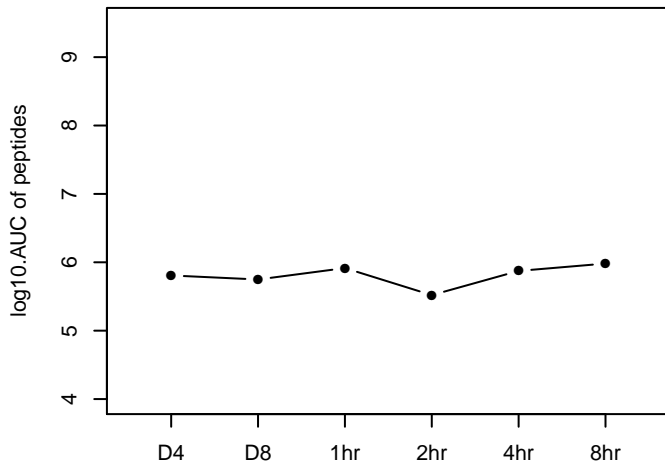**MYPT1\_HUMAN**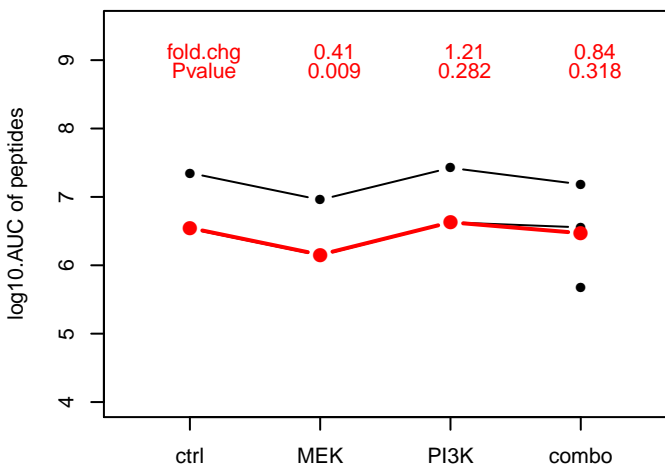**MYPT1\_HUMAN**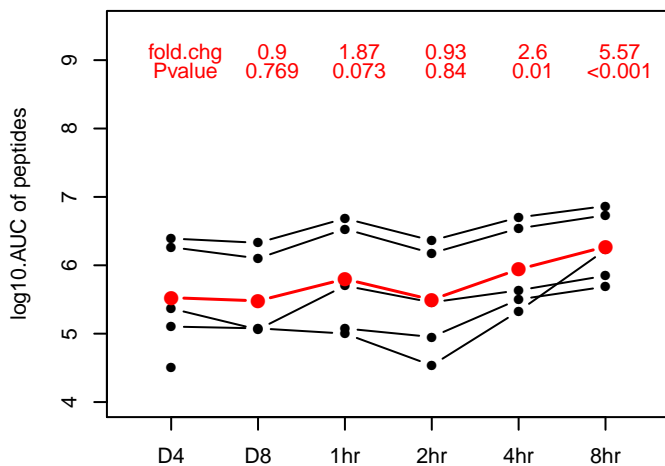**MYPT2\_HUMAN**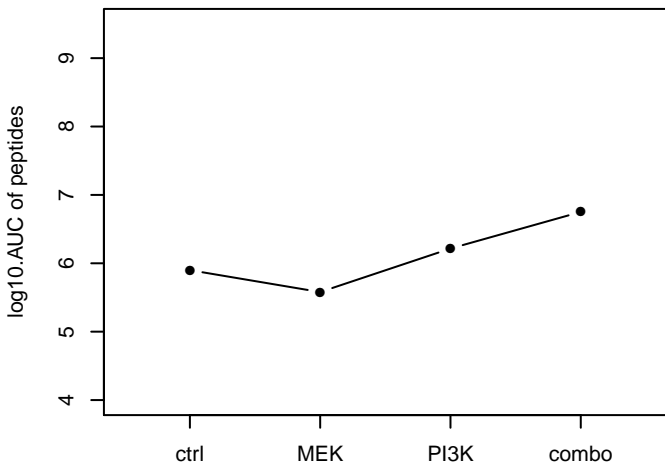**MYPT2\_HUMAN**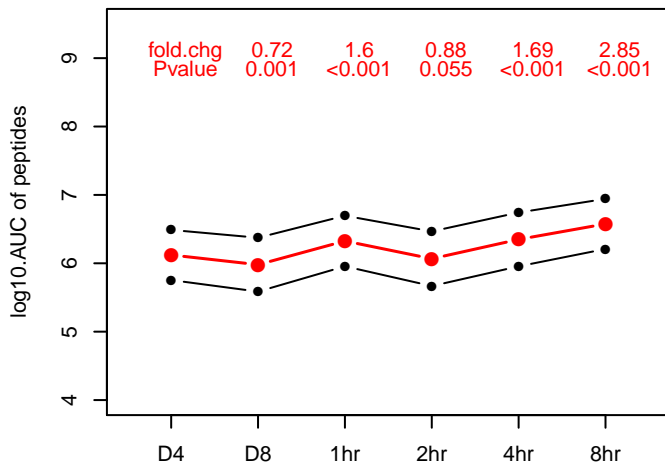

**NACA\_HUMAN**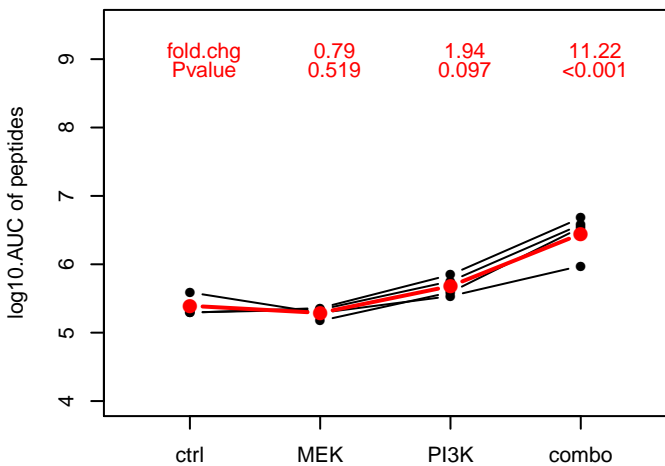**NACA\_HUMAN**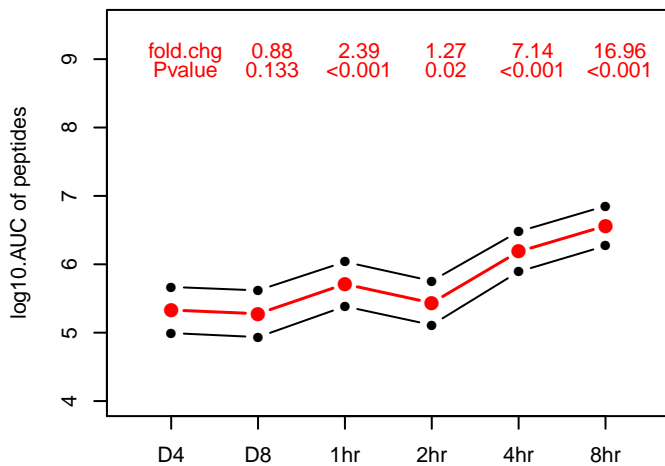**NADAP\_HUMAN**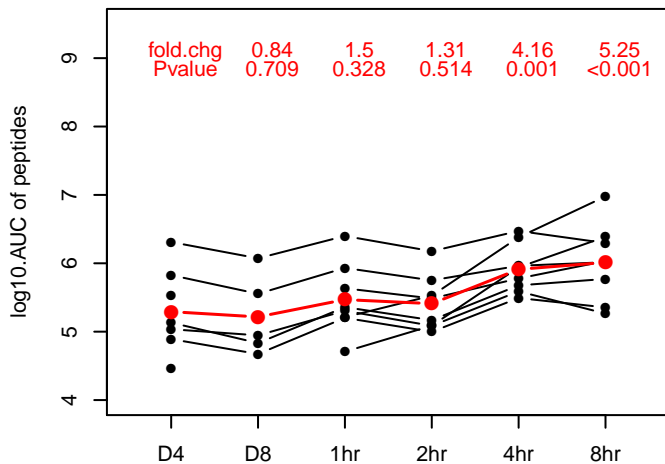**NASP\_HUMAN**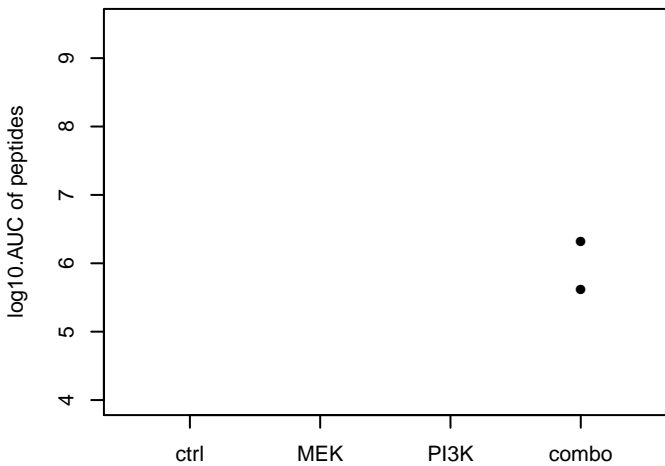**NASP\_HUMAN**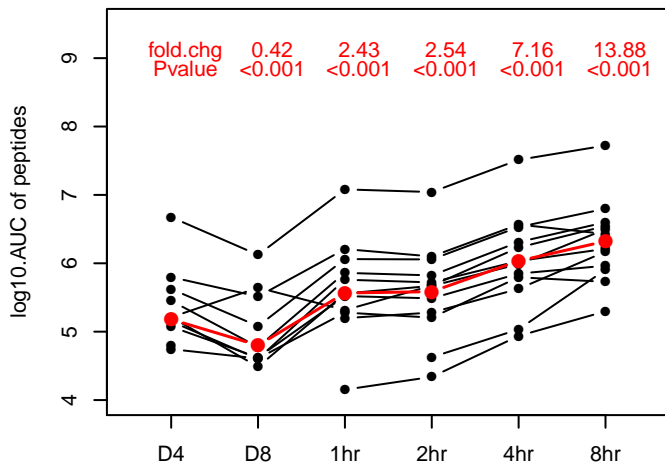

**NBEL1\_HUMAN**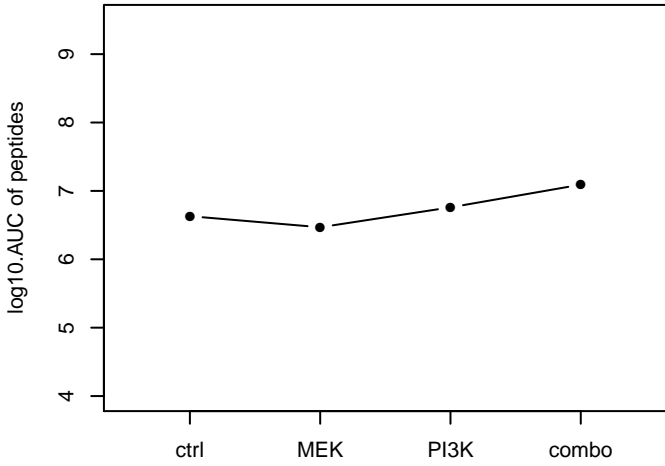**NBEL1\_HUMAN**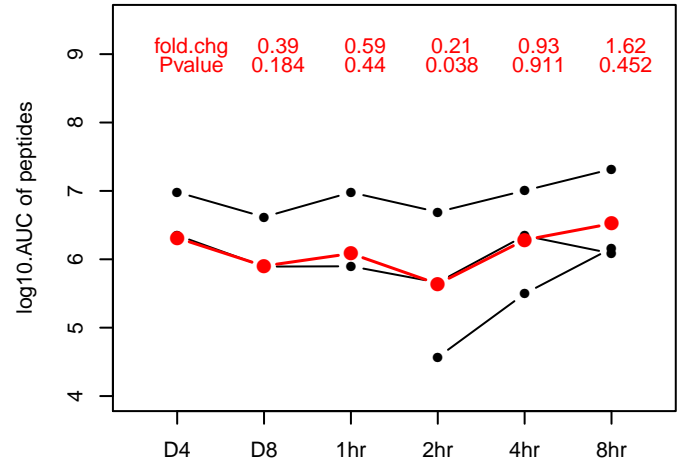**NBEL2\_HUMAN**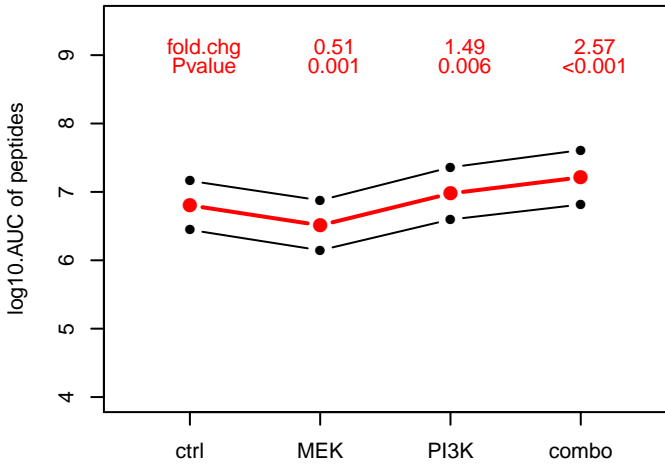**NBEL2\_HUMAN**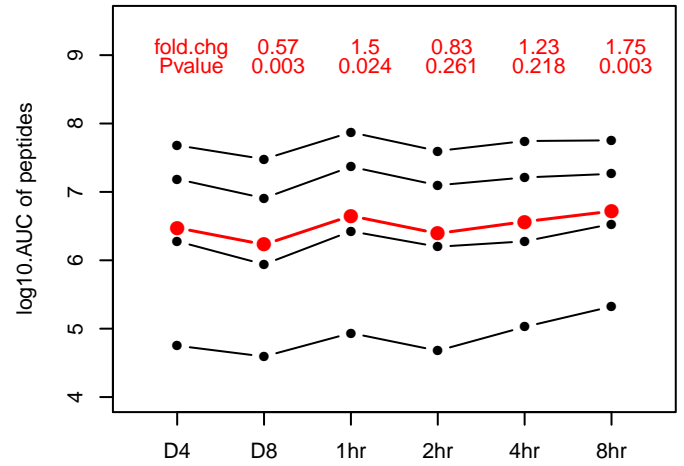**NBN\_HUMAN**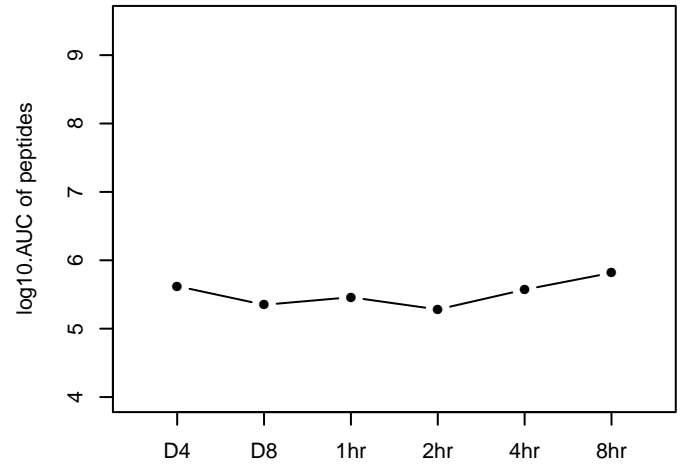

### NBR1\_HUMAN

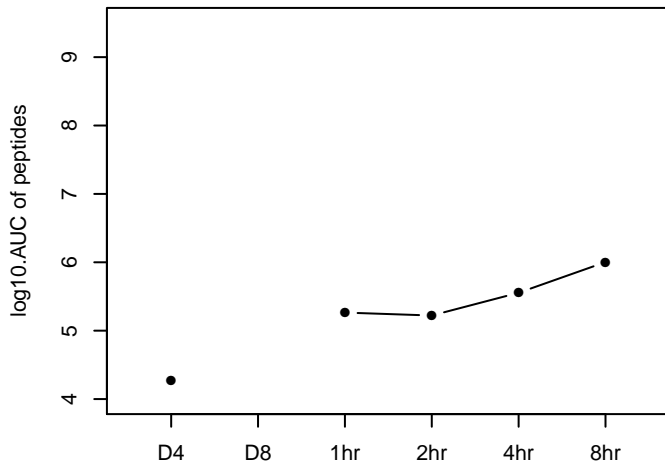

### NCOA4\_HUMAN

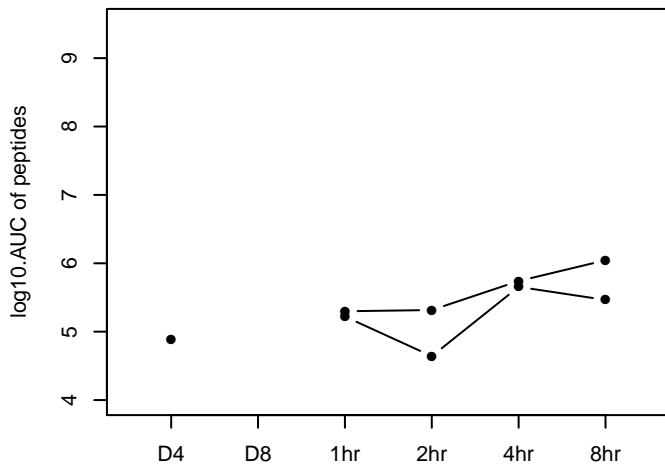

### NDC80\_HUMAN

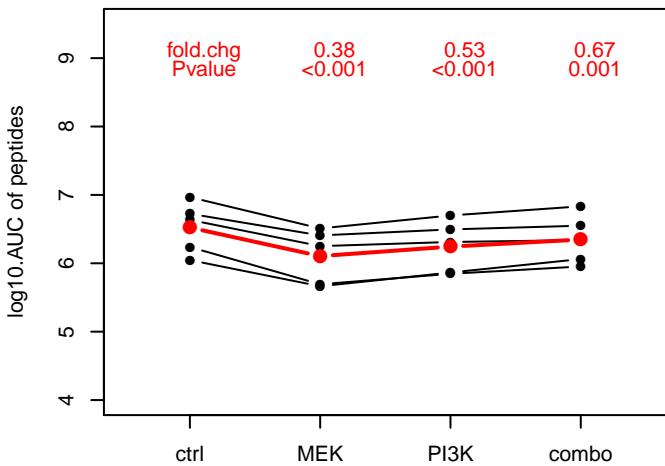

### NDC80\_HUMAN

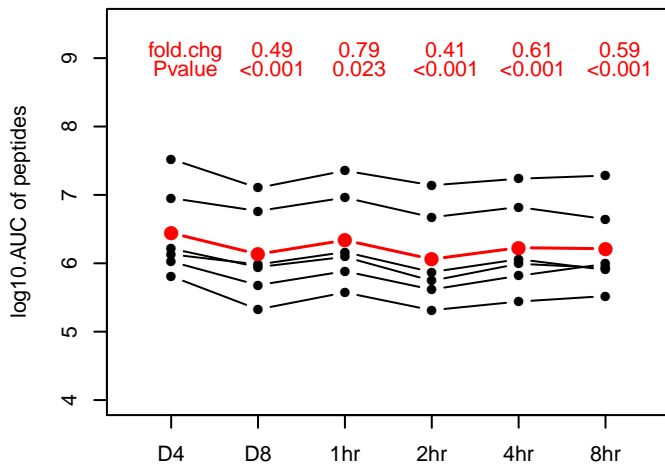

### NDE1\_HUMAN

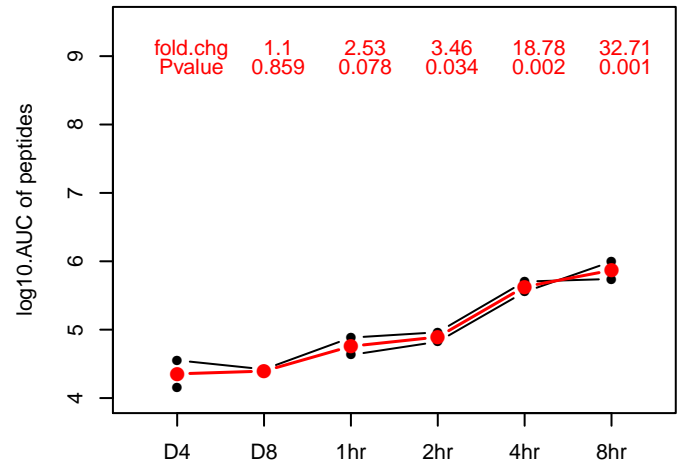

### NDRG2\_HUMAN

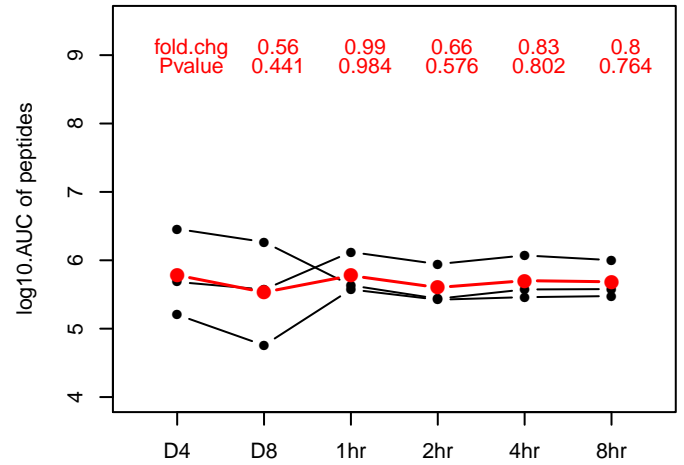

### NDRG3\_HUMAN

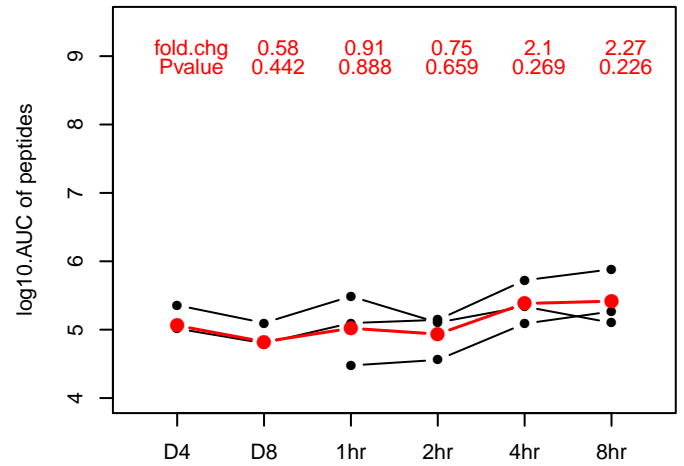

**NEB1\_HUMAN**

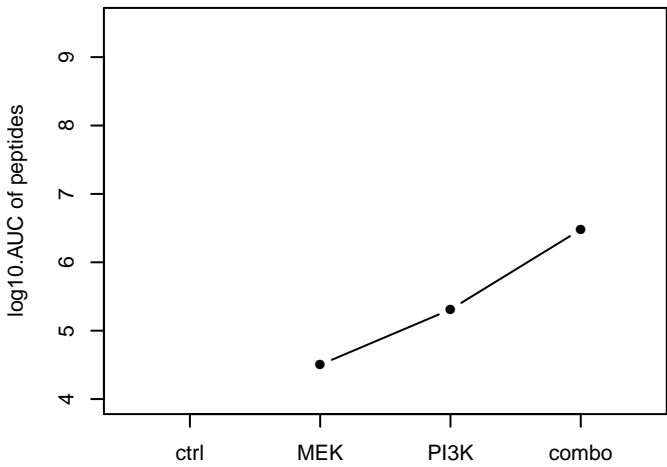

**NEB1\_HUMAN**

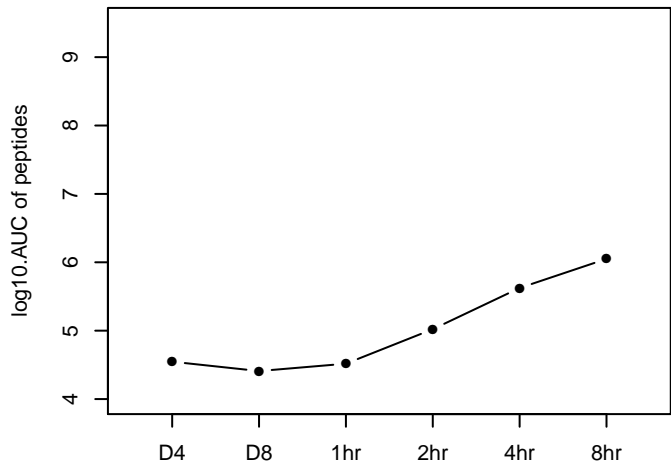

**NED4L\_HUMAN**

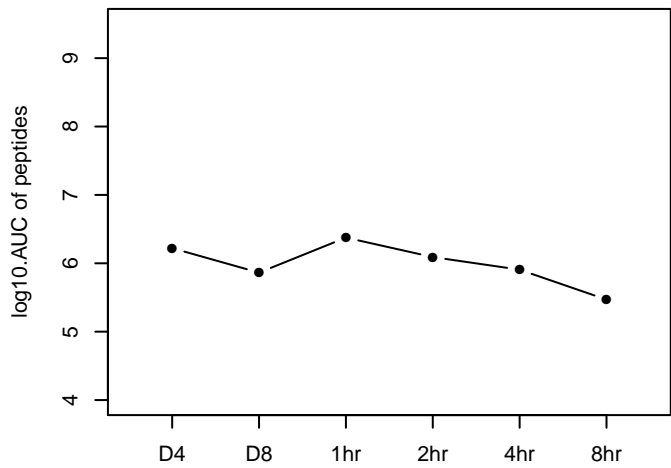

**NEK2\_HUMAN**

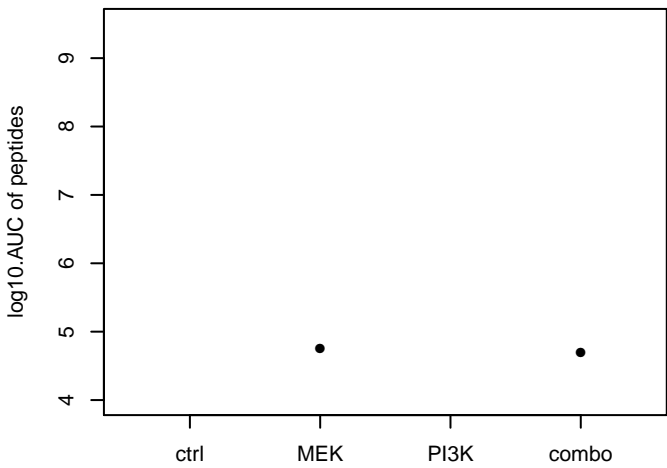

### NEP\_HUMAN

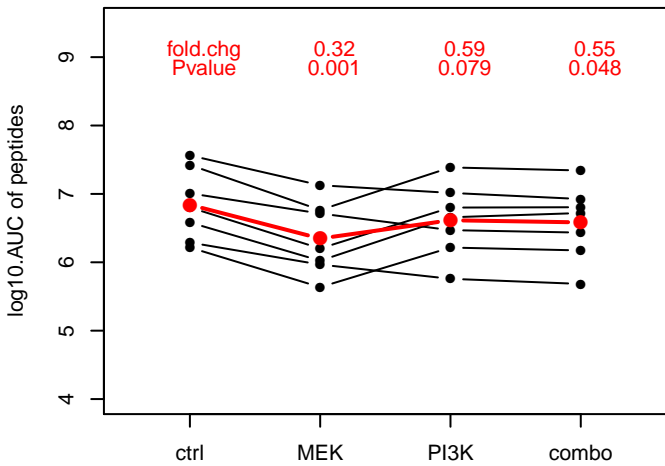

### NEP\_HUMAN

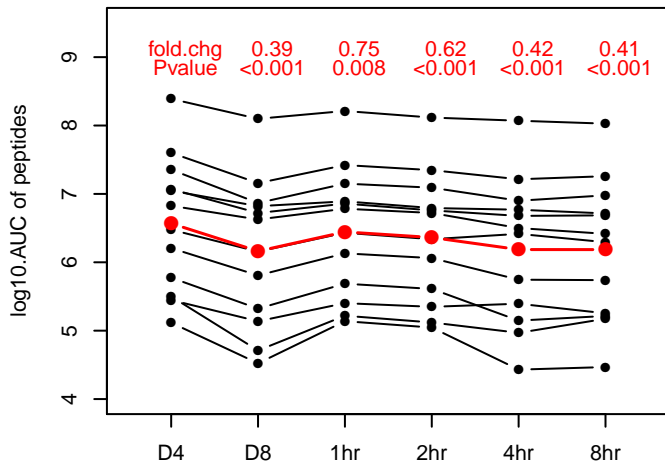

### NEST\_HUMAN

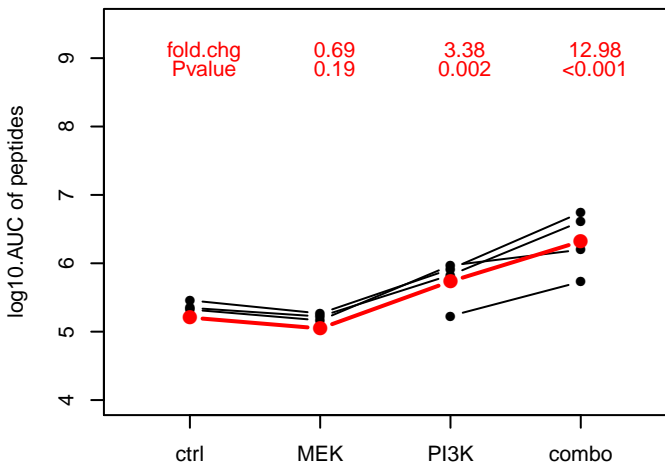

### NEST\_HUMAN

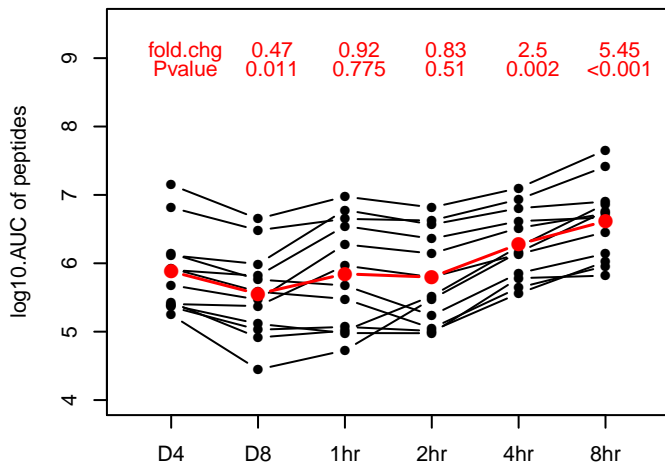

### NFIA\_HUMAN

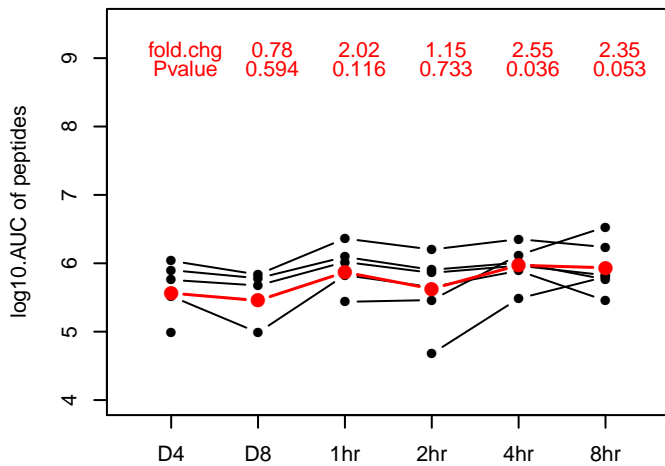



### NFIP2\_HUMAN

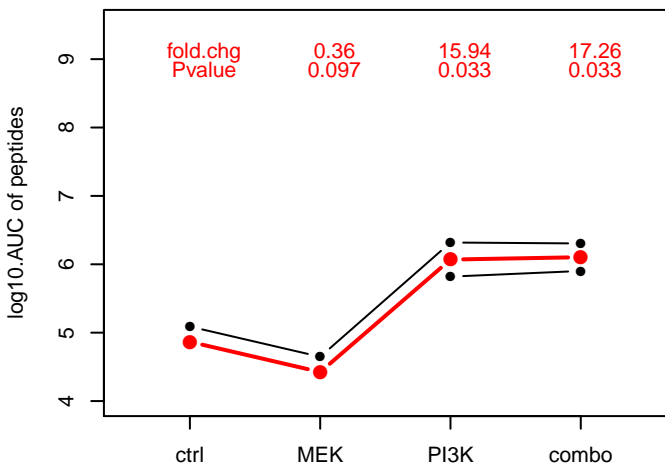

### NFIP2\_HUMAN

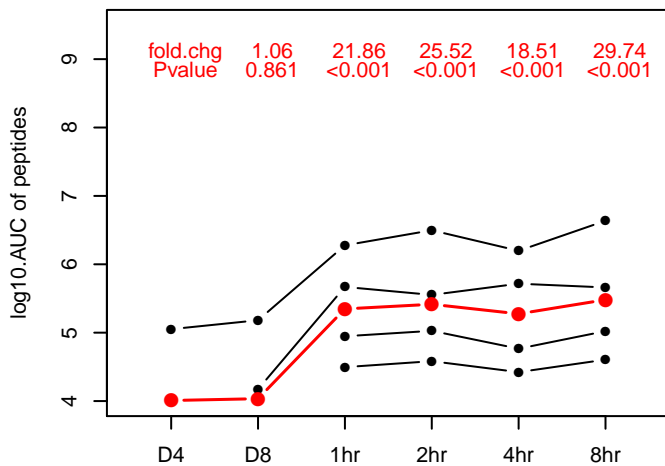

### NGAP\_HUMAN

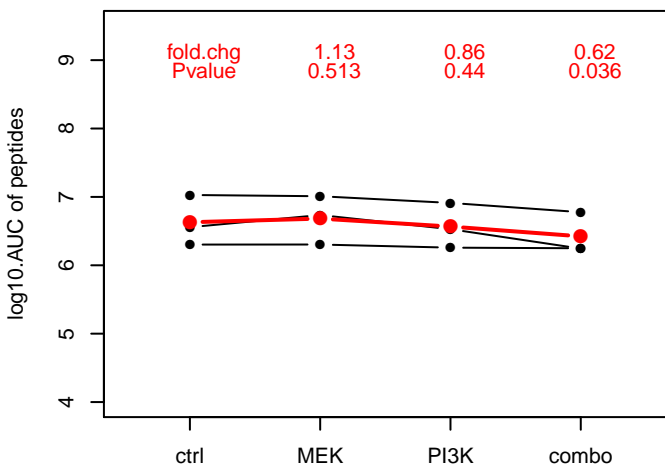

### NGAP\_HUMAN

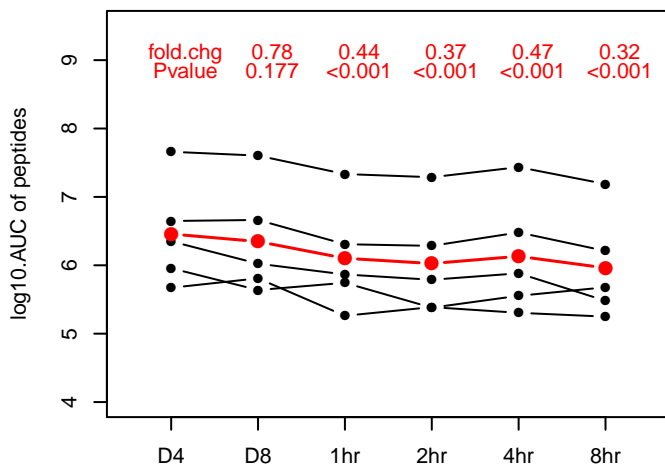

### NGDN\_HUMAN

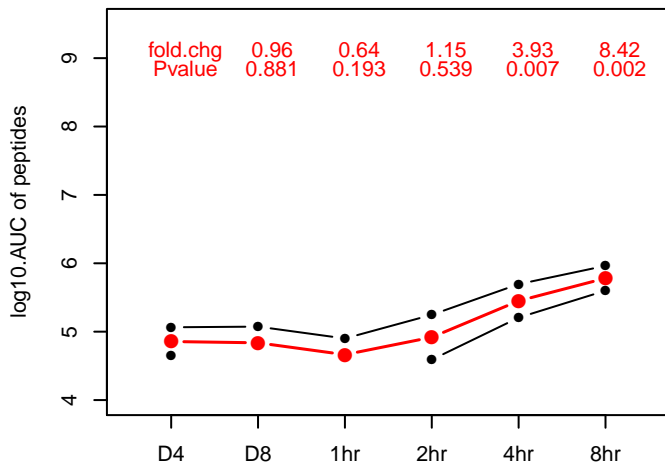

### NHSL1\_HUMAN

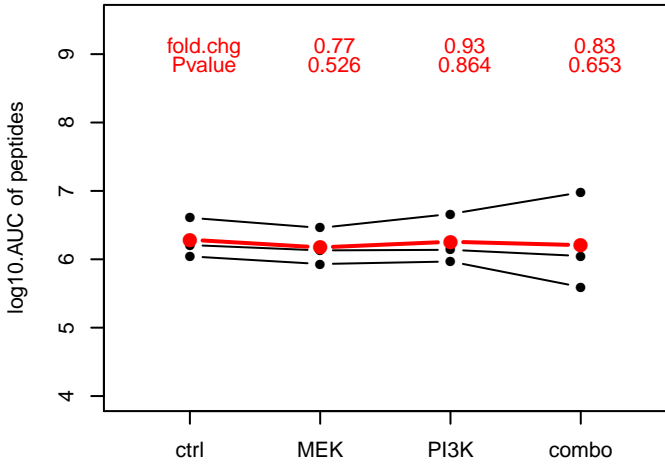

### NHSL1\_HUMAN

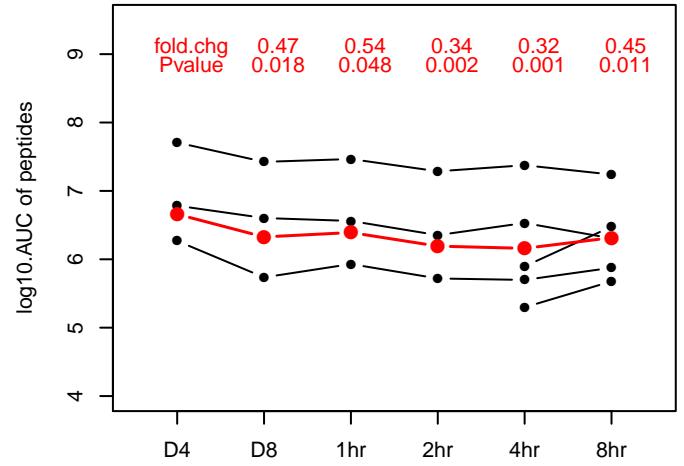

### NIPA\_HUMAN

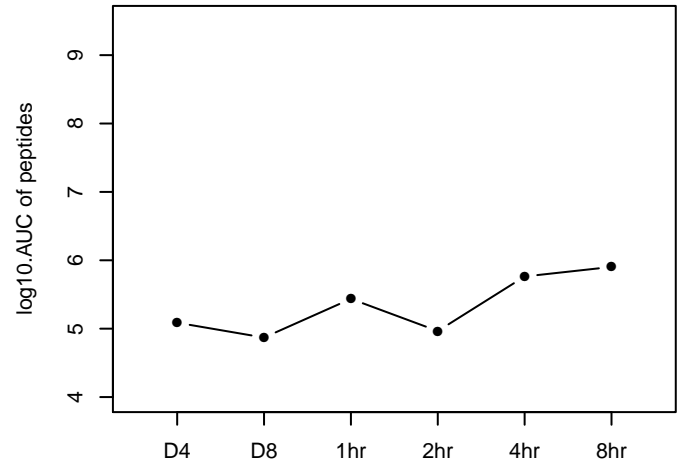

### NIPBL\_HUMAN

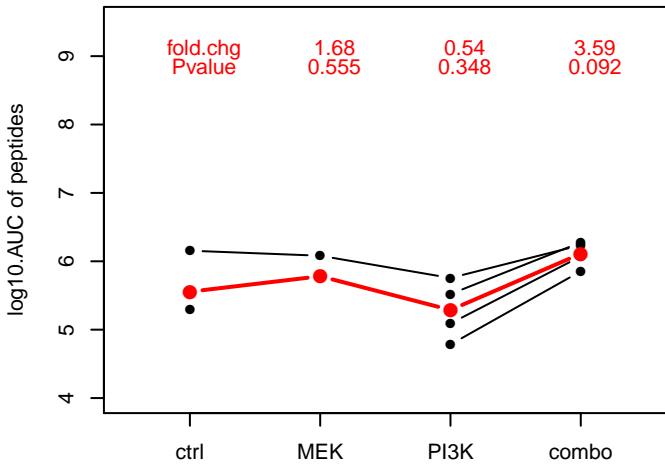

### NIPBL\_HUMAN

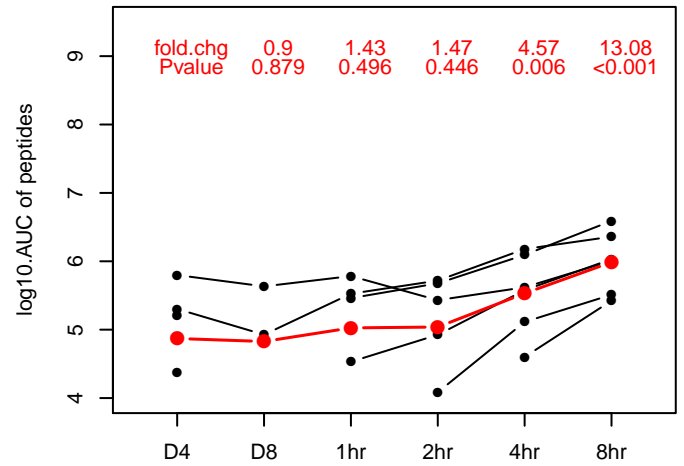

**NKAP\_HUMAN**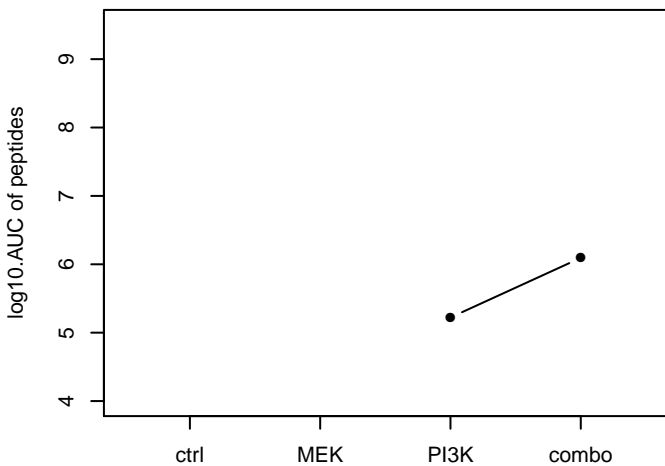**NKAP\_HUMAN**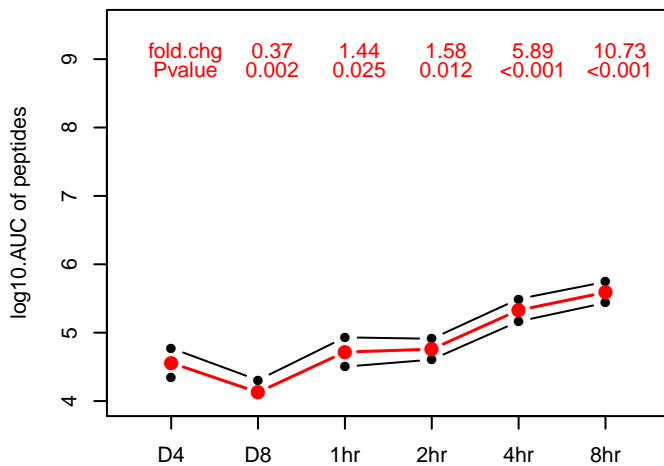**NKTR\_HUMAN**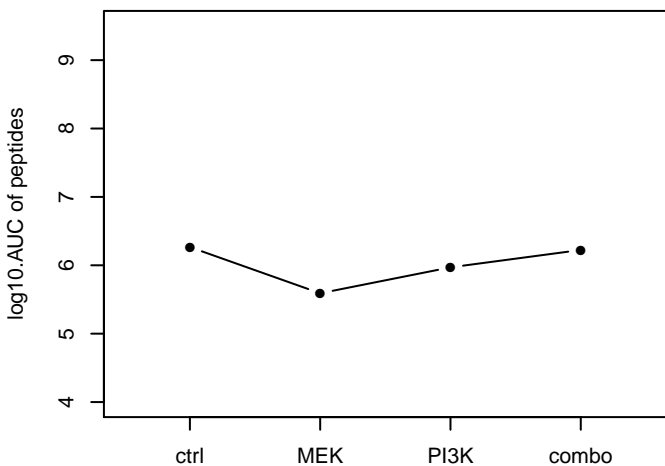**NKTR\_HUMAN**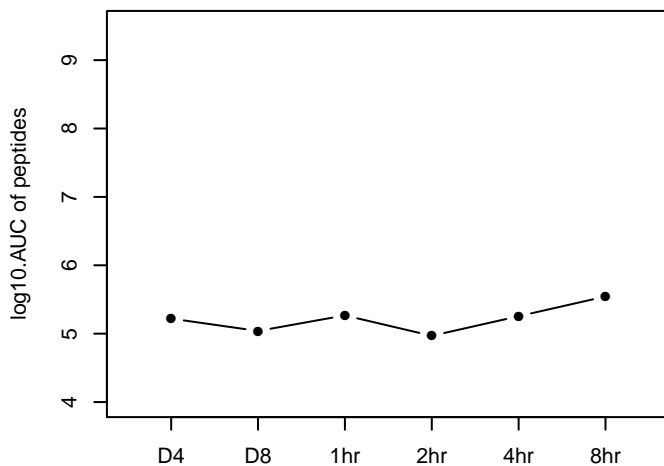**NLK\_HUMAN**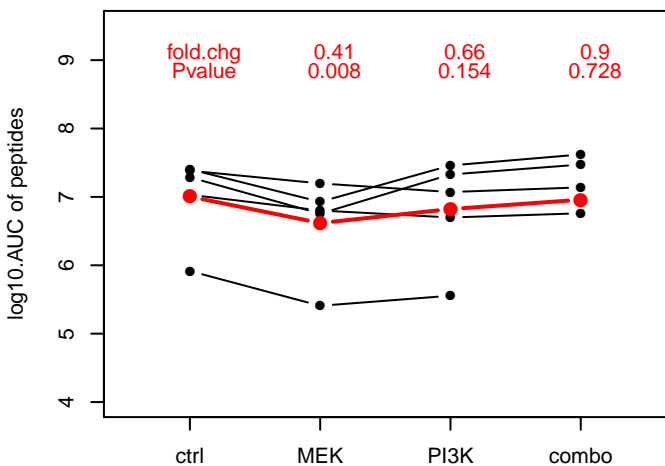**NLK\_HUMAN**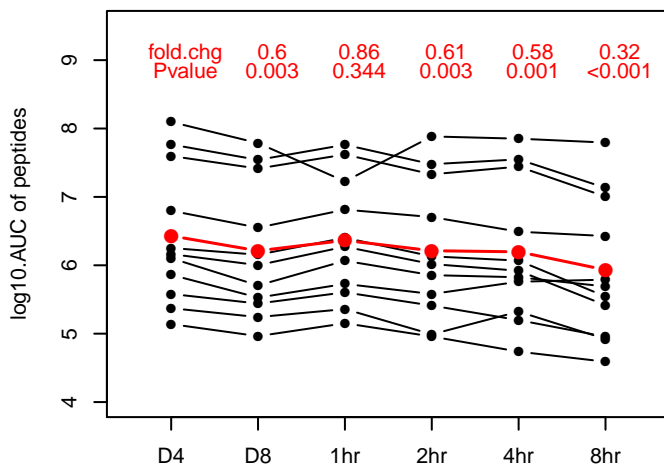

**NNTM\_HUMAN**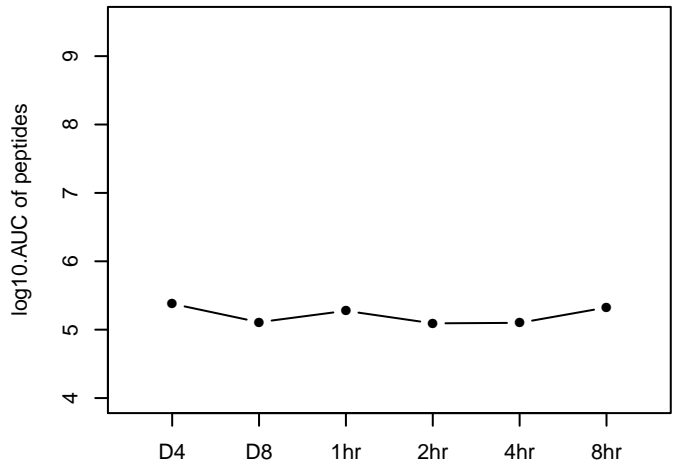**NOB1\_HUMAN**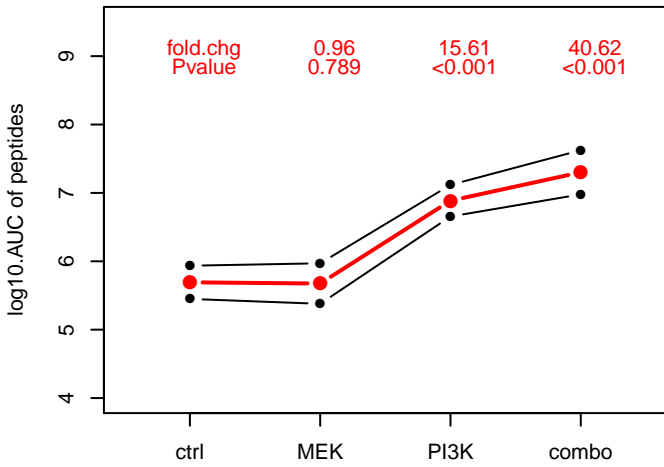**NOB1\_HUMAN**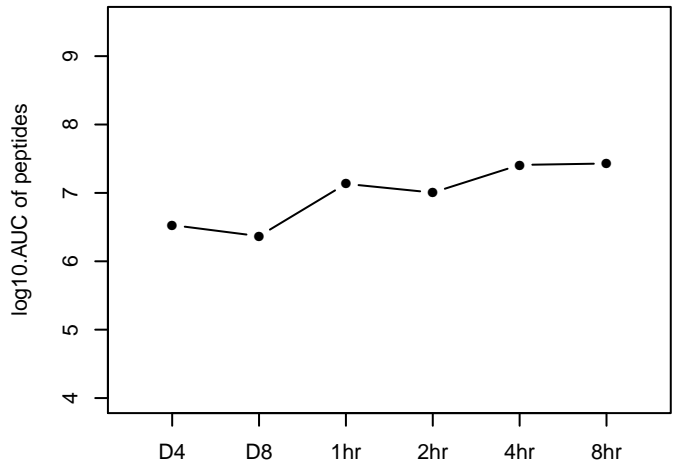**NOG1\_HUMAN**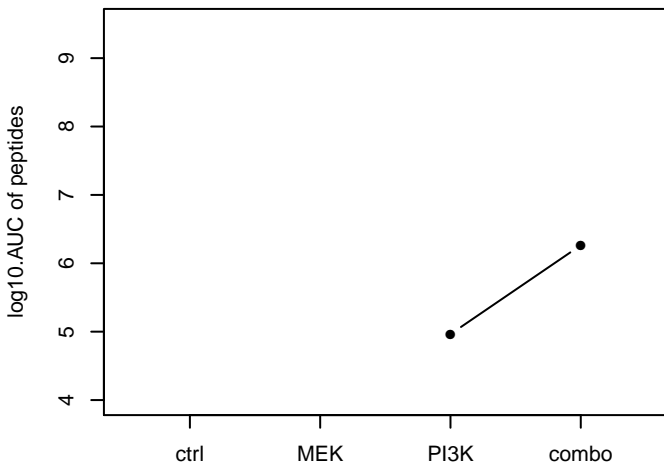**NOG1\_HUMAN**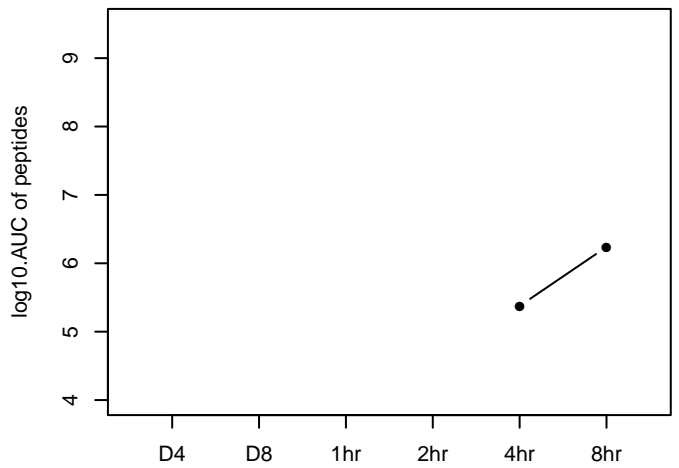

**NOL7\_HUMAN**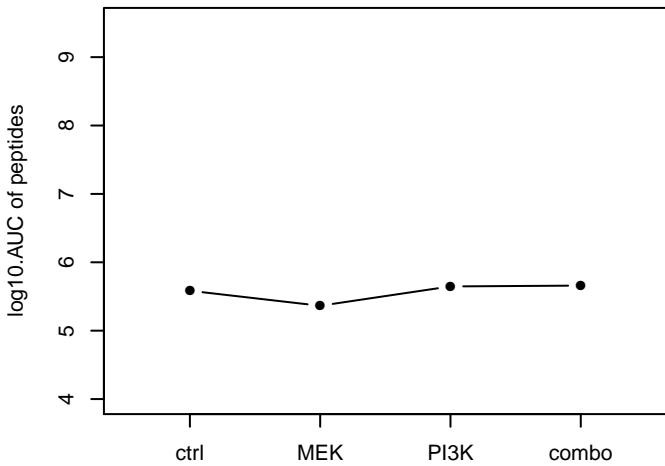**NOL7\_HUMAN**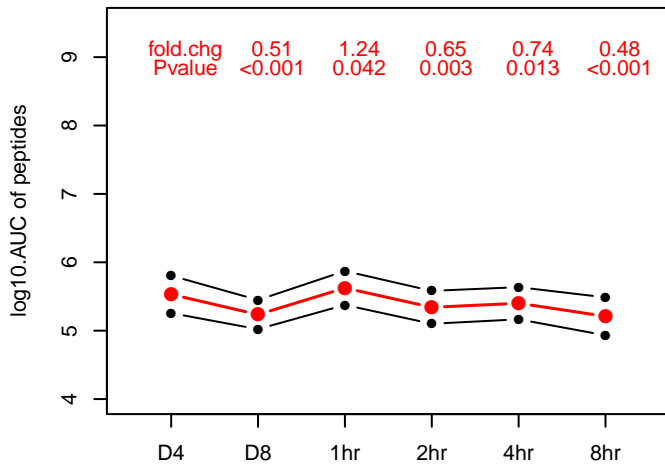**NOP2\_HUMAN**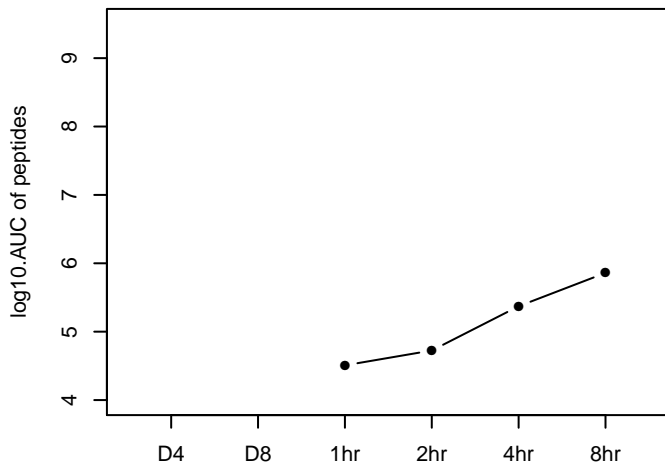**NOP56\_HUMAN**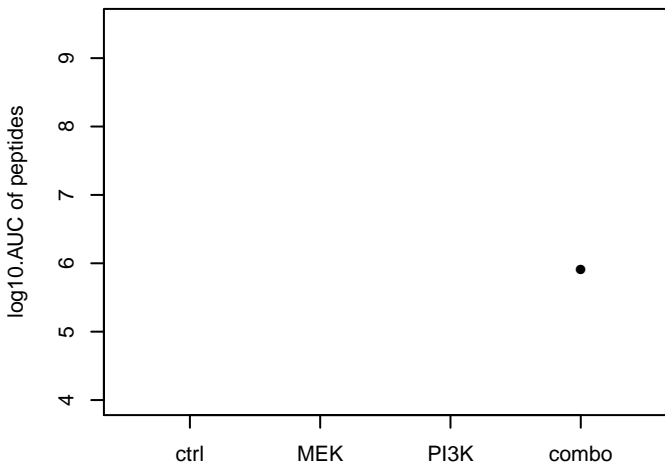**NOP56\_HUMAN**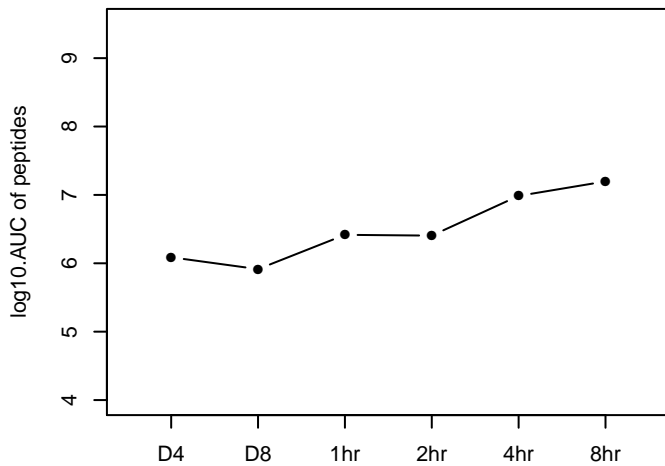

### NRP1\_HUMAN

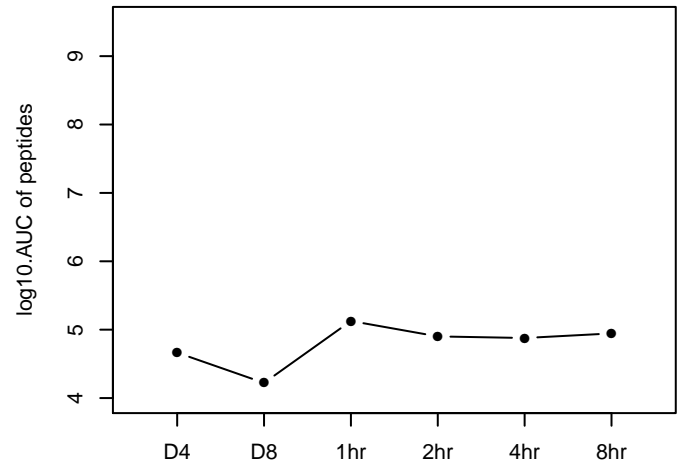

### NSD1\_HUMAN

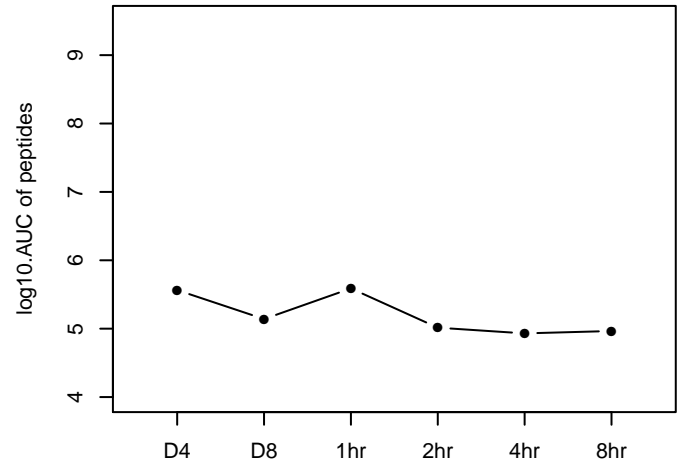

### NU153\_HUMAN

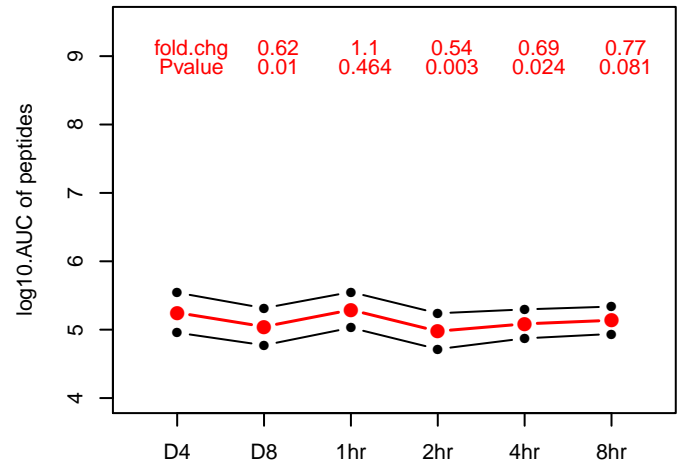

**NU205\_HUMAN**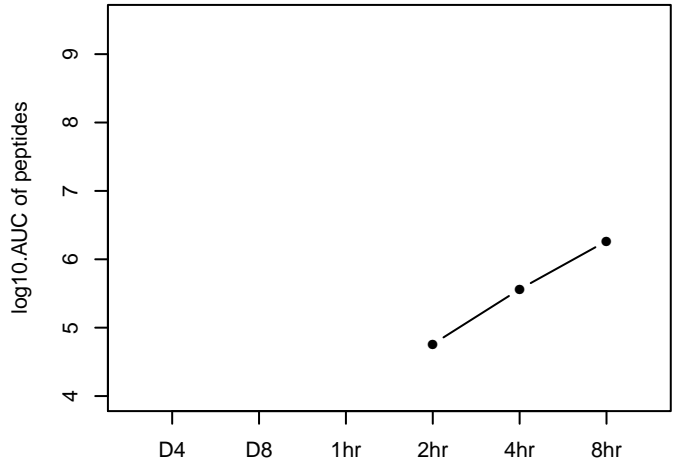**NU214\_HUMAN**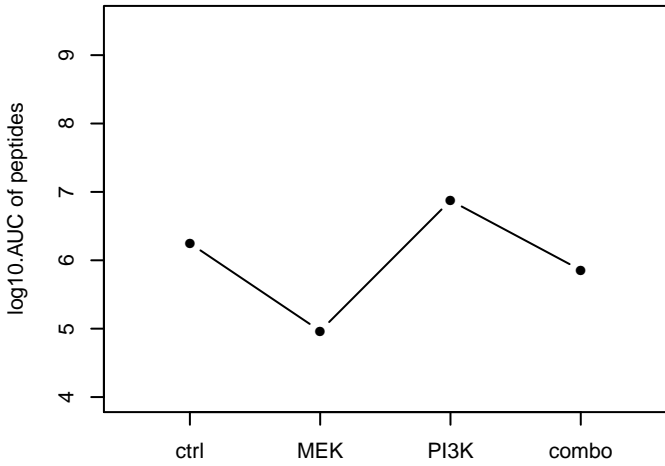**NUCKS\_HUMAN**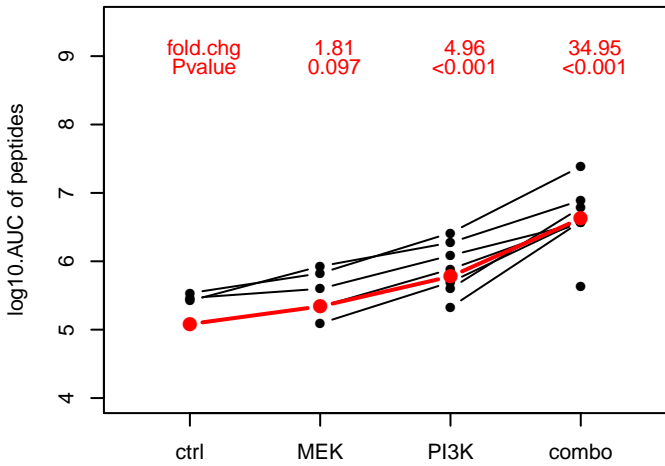**NUCKS\_HUMAN**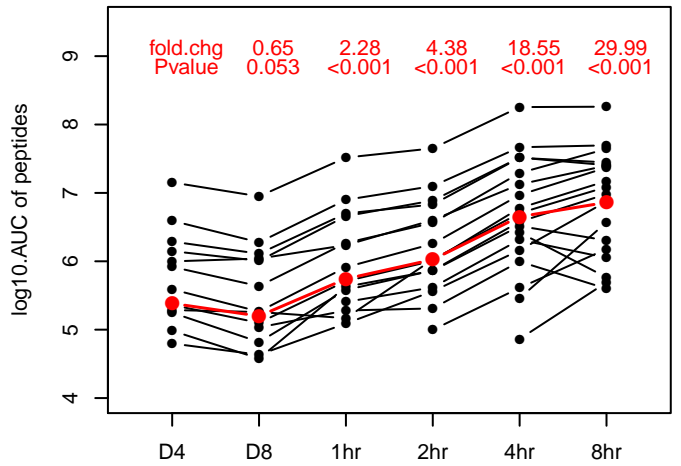

### NUCL\_HUMAN

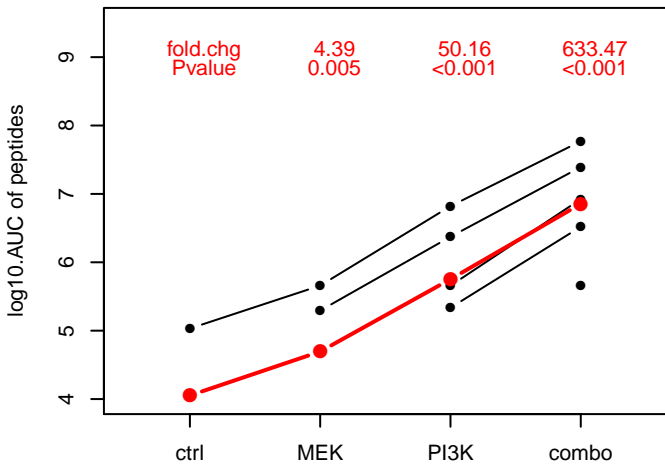

### NUCL\_HUMAN

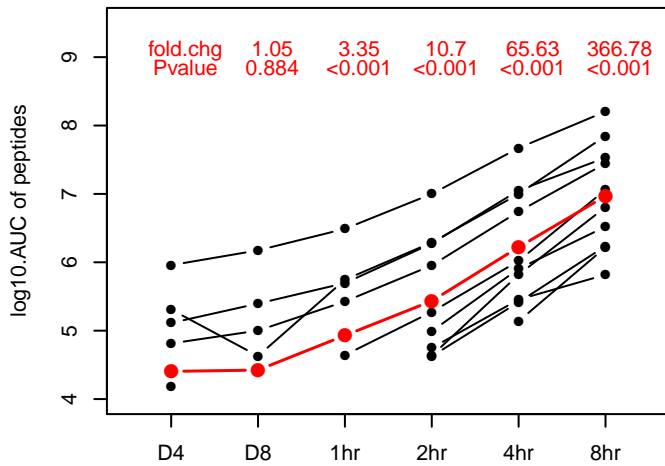

### NUMA1\_HUMAN

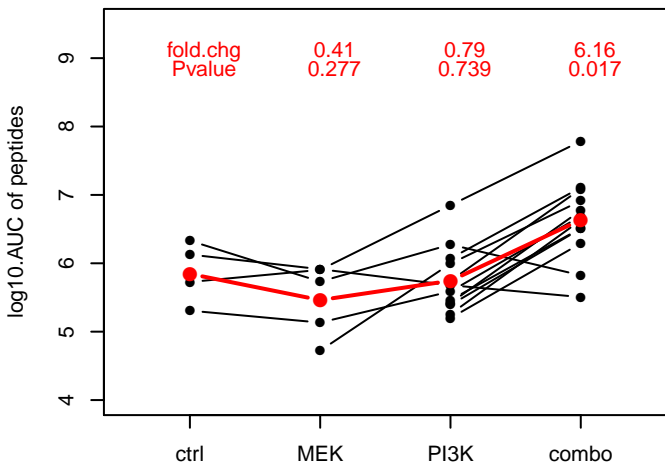

### NUMA1\_HUMAN

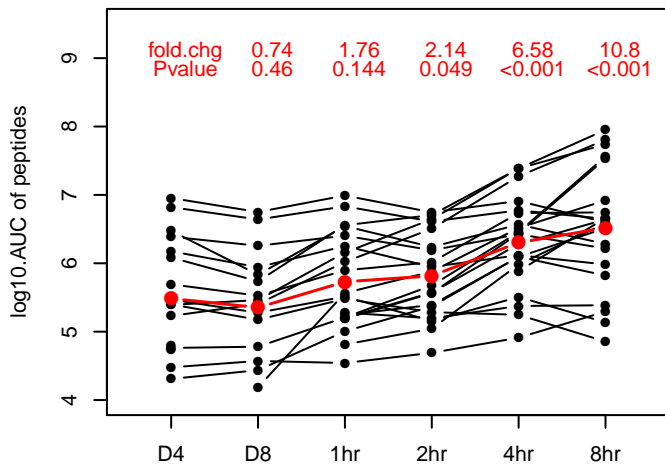

### NUP85\_HUMAN

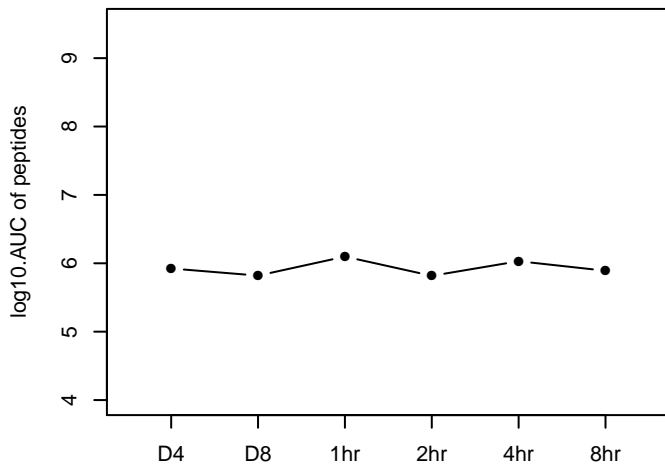



### NUP88\_HUMAN

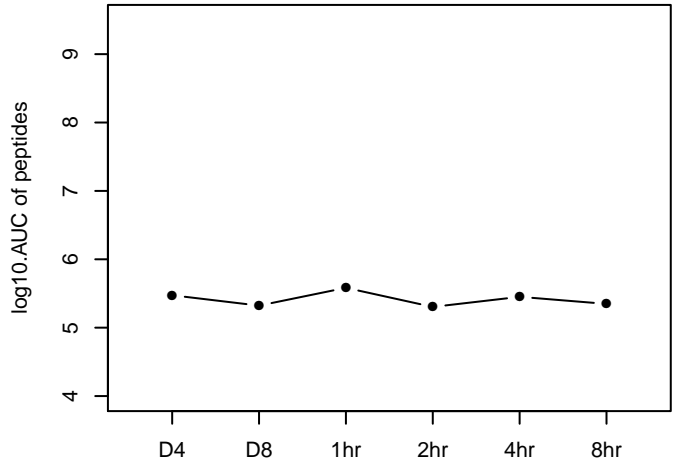

### NUP93\_HUMAN

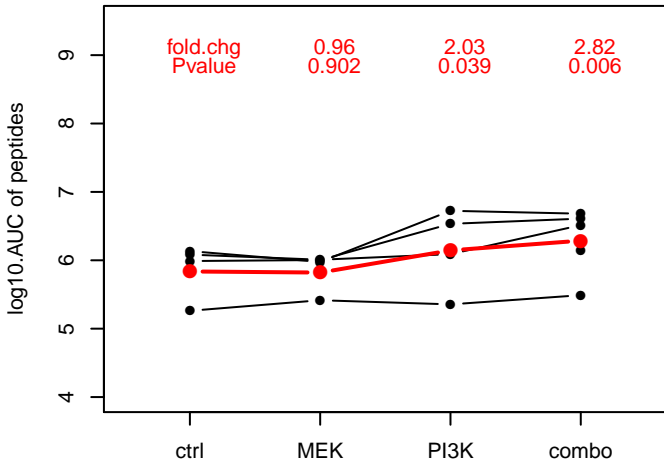

### NUP93\_HUMAN

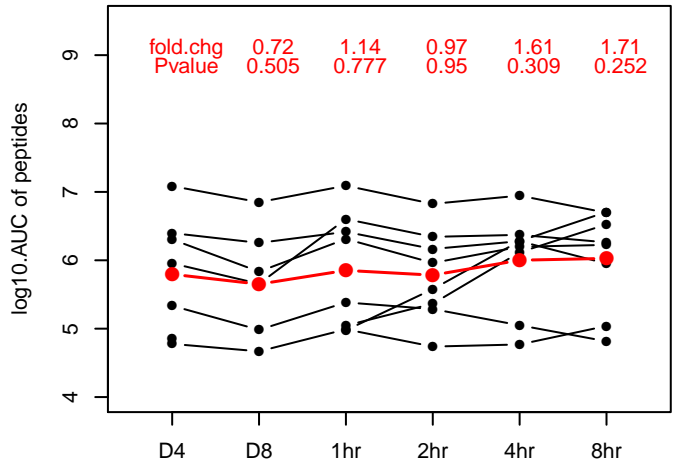

### NUP98\_HUMAN

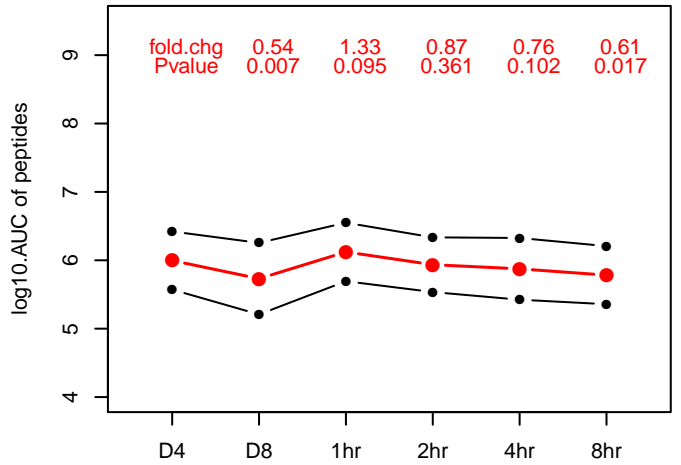

### NUSAP\_HUMAN

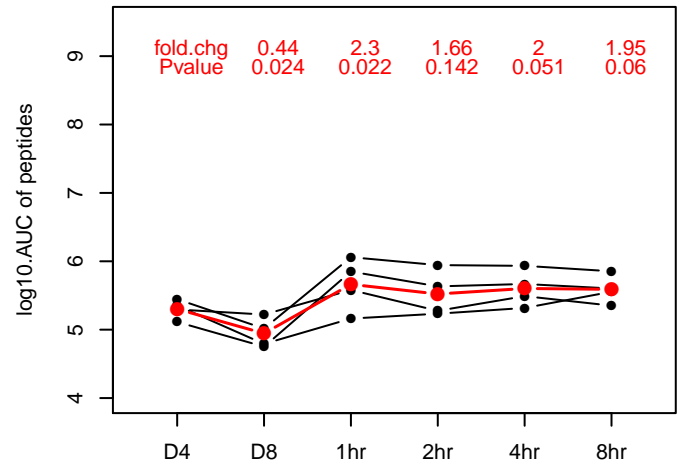

### OCAD1\_HUMAN

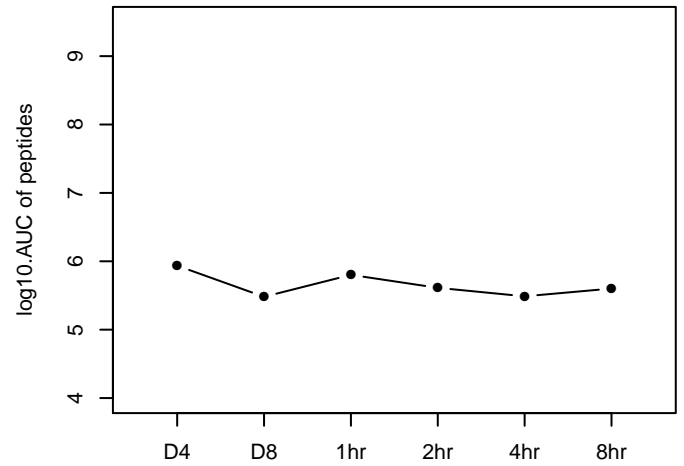

### OGFR\_HUMAN

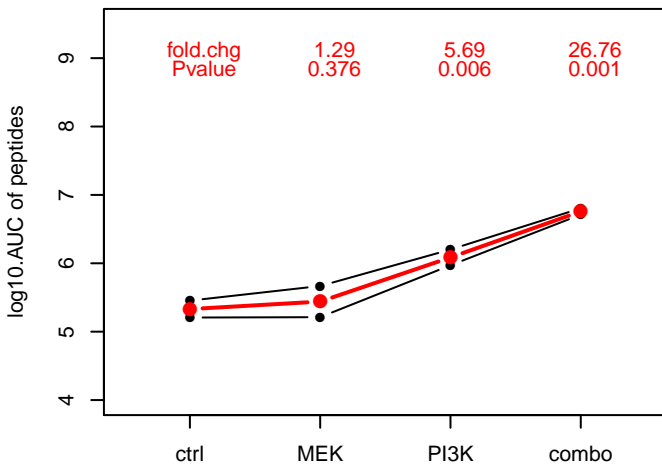

### OGFR\_HUMAN

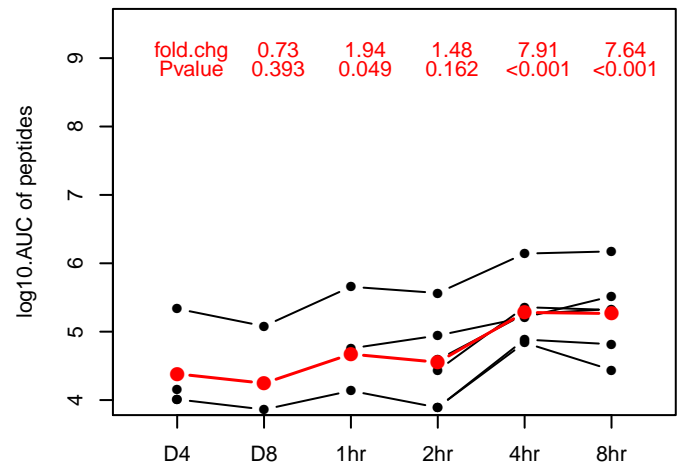

### OLA1\_HUMAN

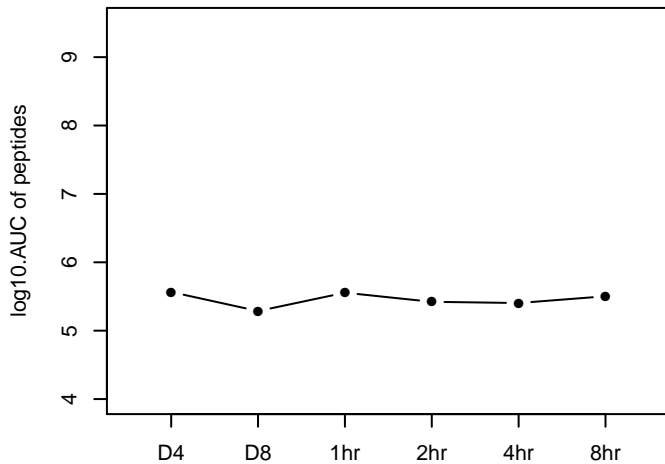

### OSB10\_HUMAN

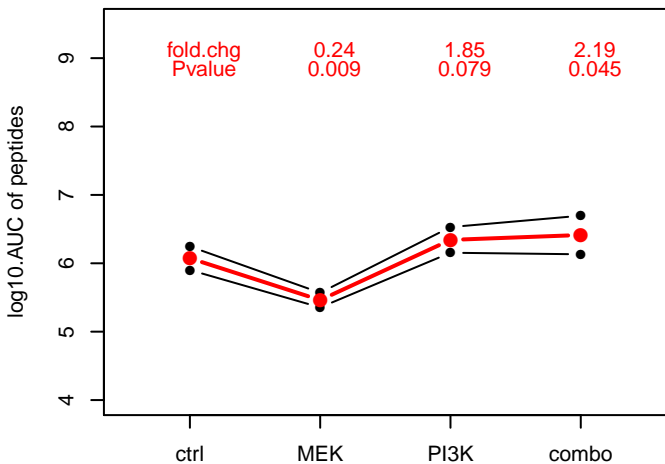

### OSB10\_HUMAN

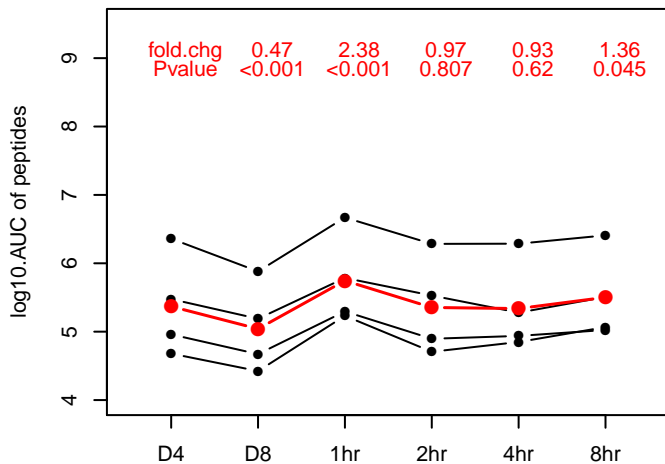

### OSB11\_HUMAN

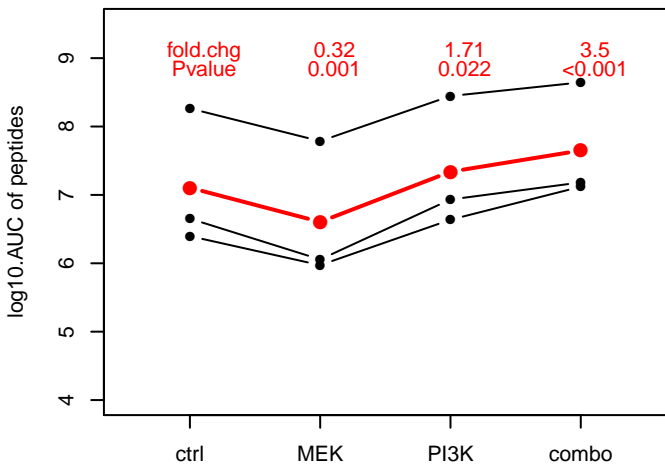

### OSB11\_HUMAN

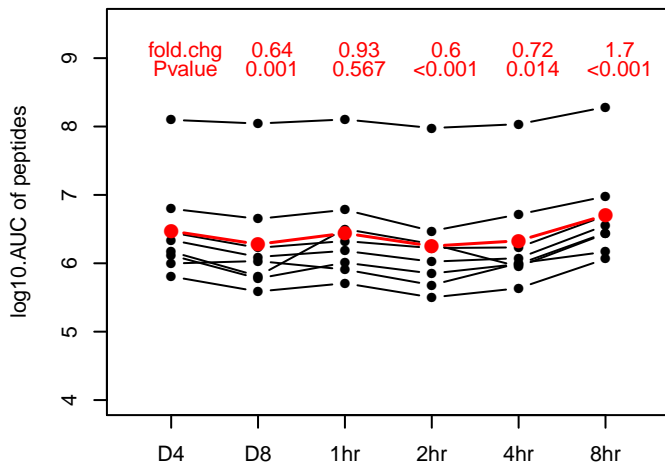

**P52K\_HUMAN**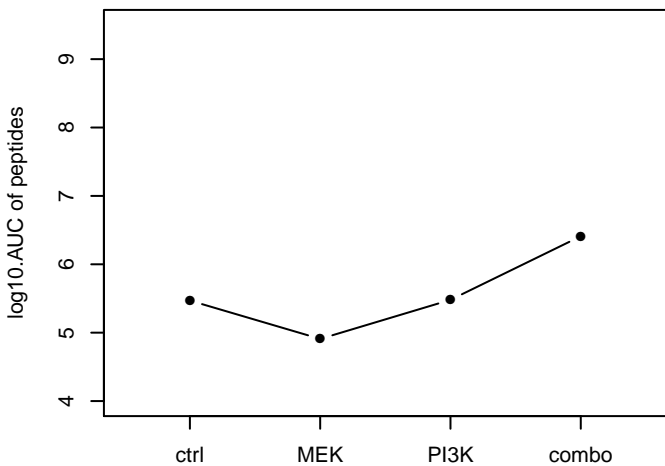**P52K\_HUMAN**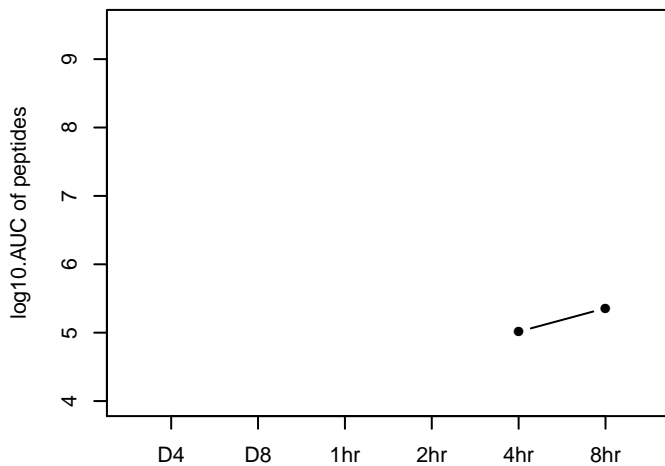**P511\_HUMAN**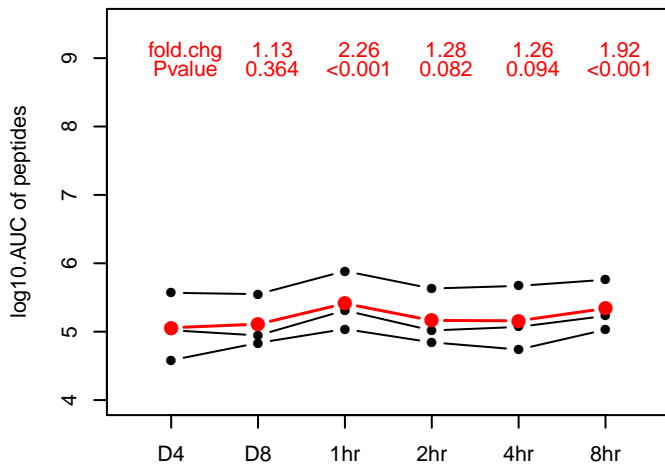**PA2G4\_HUMAN**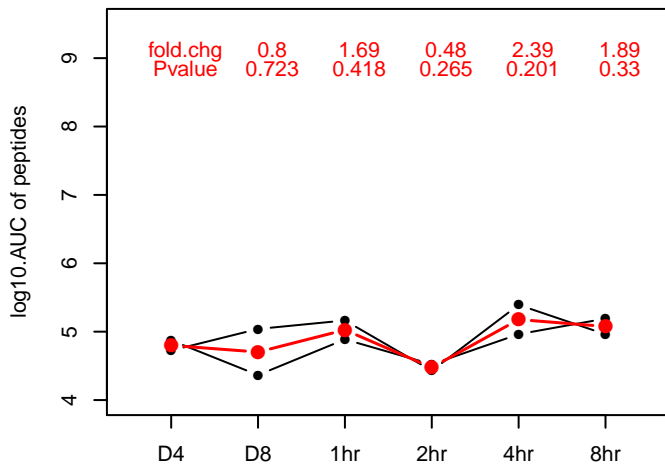

**PACE1\_HUMAN**

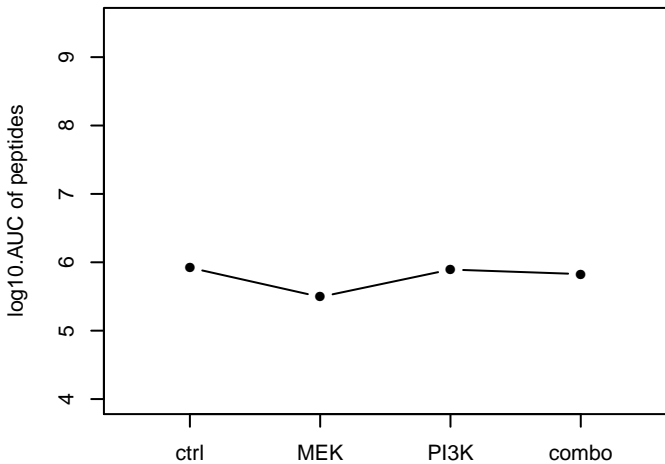

**PACE1\_HUMAN**

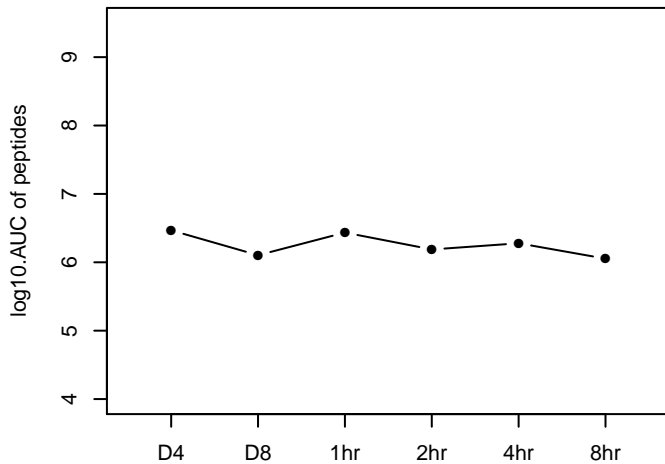

**PACS1\_HUMAN**

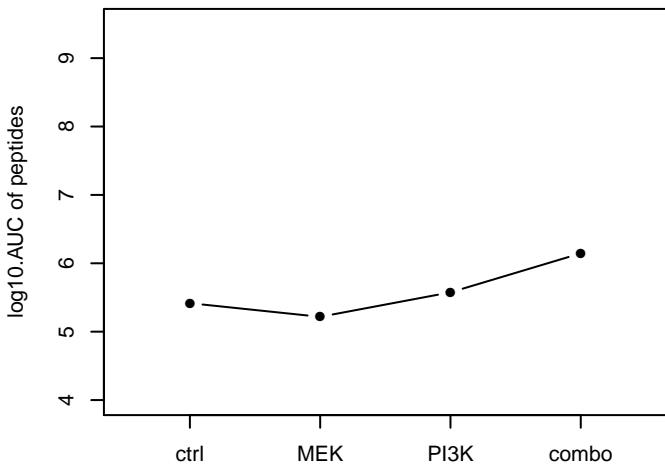

**PACS1\_HUMAN**

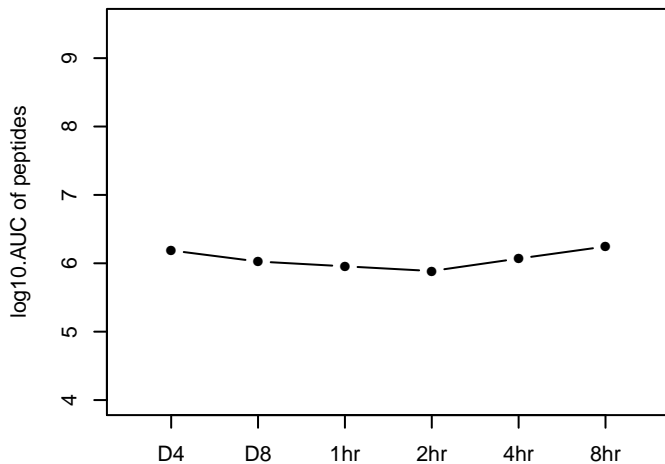

**PACS2\_HUMAN**

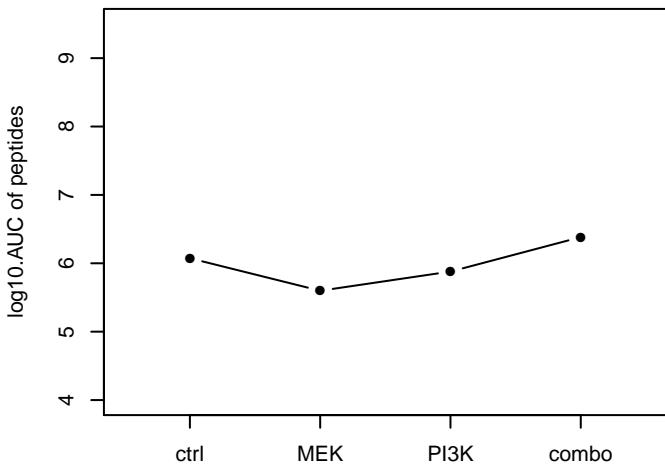

**PACS2\_HUMAN**

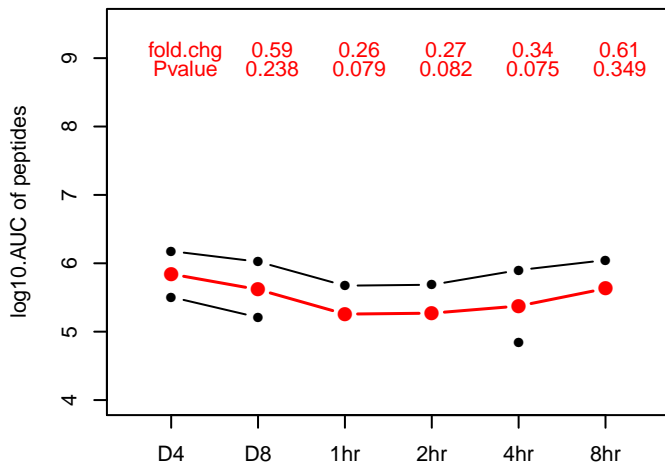

**PAIRB\_HUMAN**

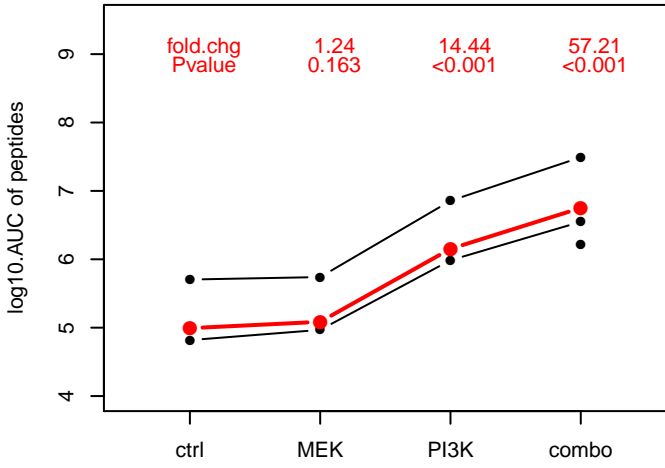

**PAIRB\_HUMAN**

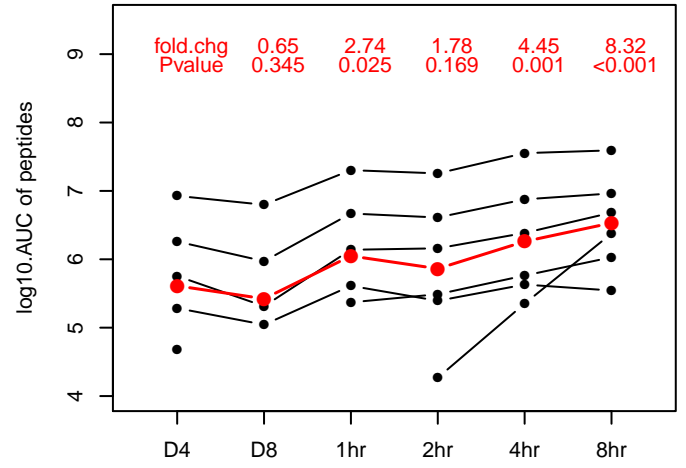

**PAPOA\_HUMAN**

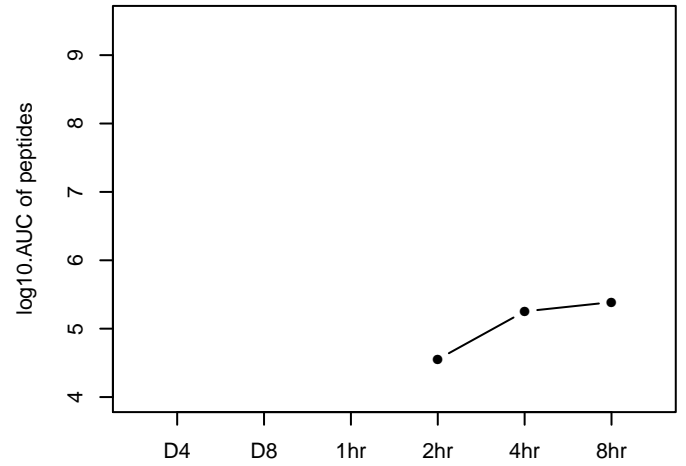

**PARD3\_HUMAN**

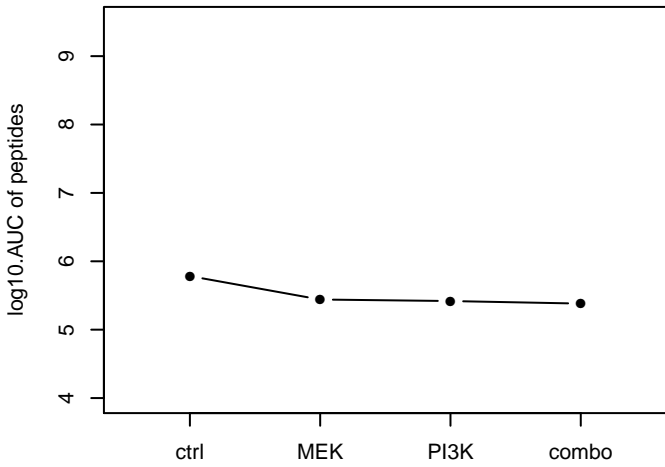

### PARN\_HUMAN

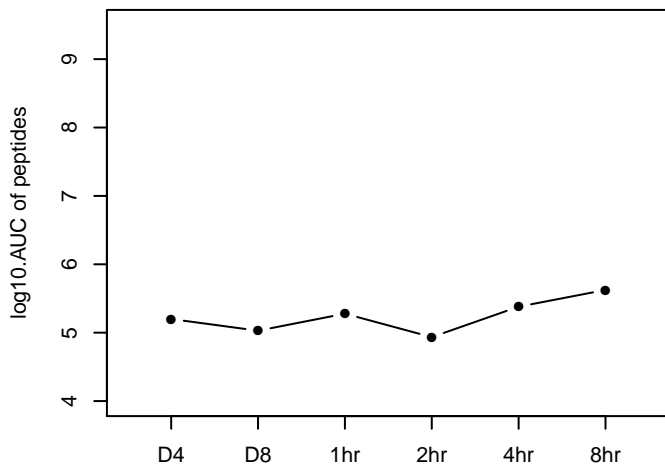

### PASK\_HUMAN

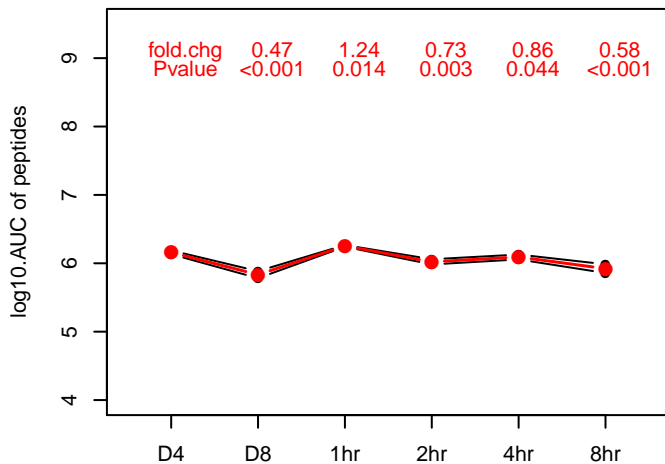

### PAXI\_HUMAN

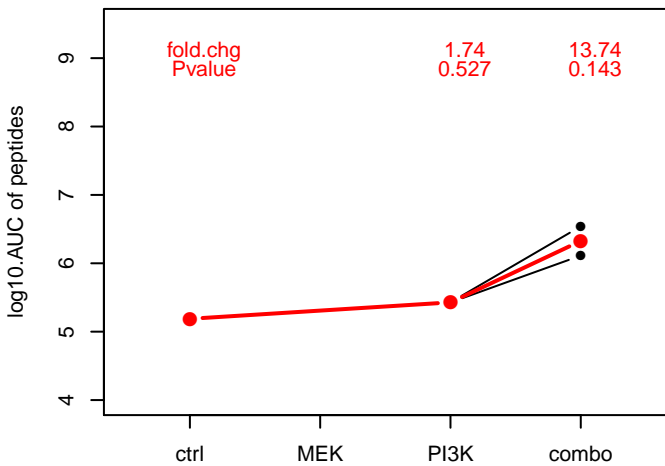

### PAXI\_HUMAN

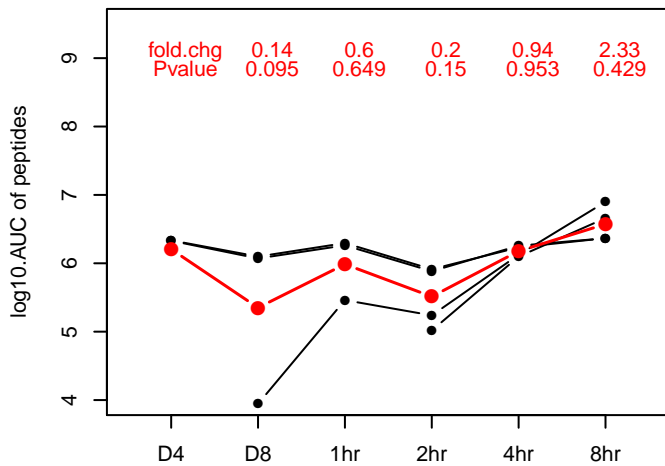

### PCCB\_HUMAN

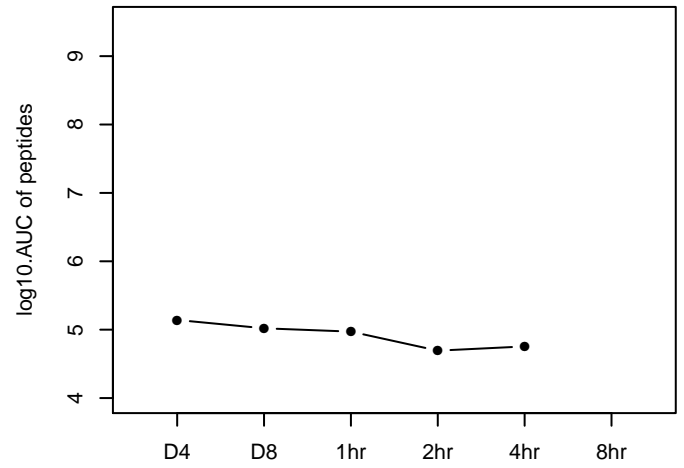

### PCF11\_HUMAN

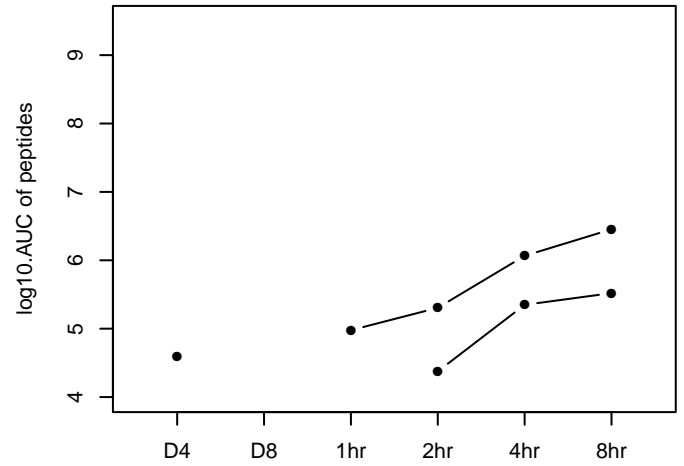

### PCM1\_HUMAN

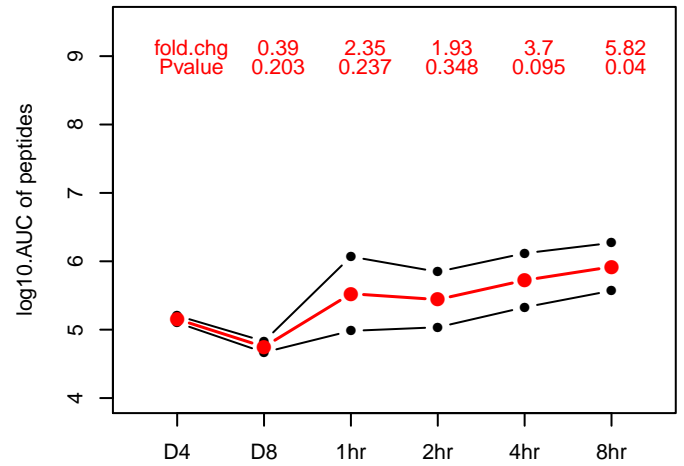



**PCNP\_HUMAN**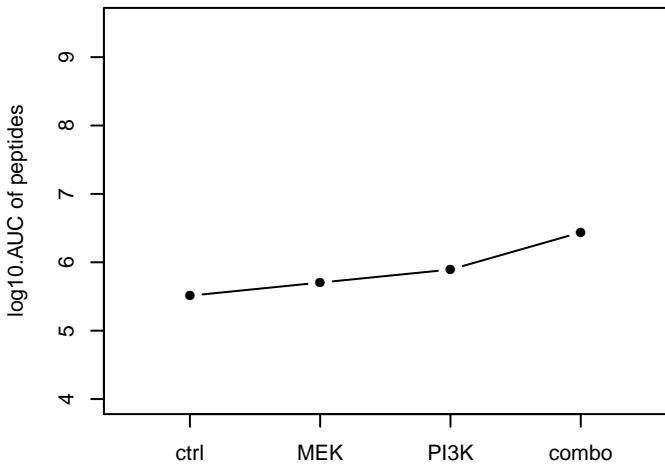**PCNP\_HUMAN**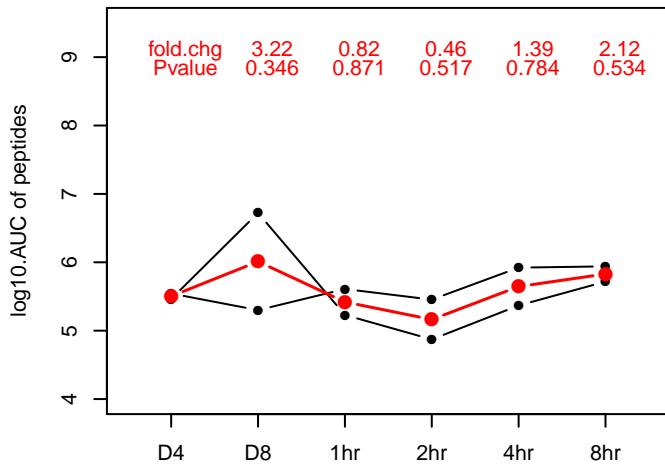**PCX3\_HUMAN**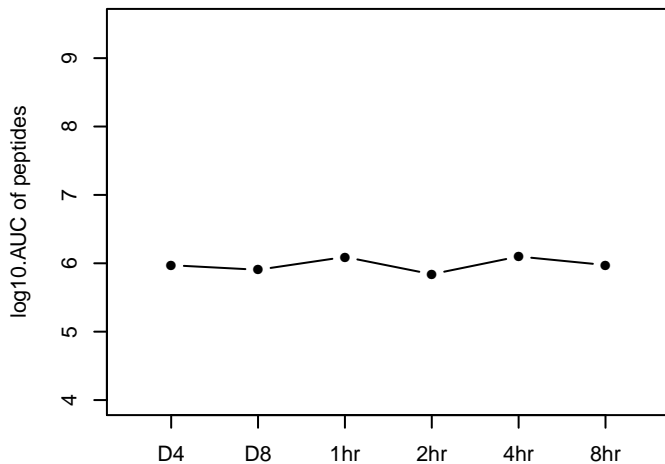**PDE4D\_HUMAN**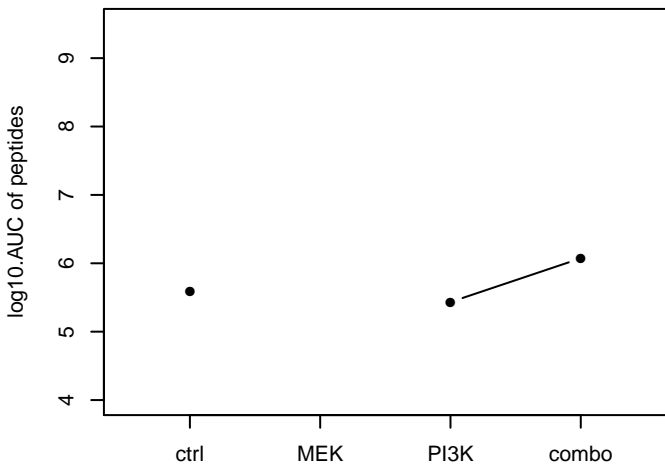**PDE4D\_HUMAN**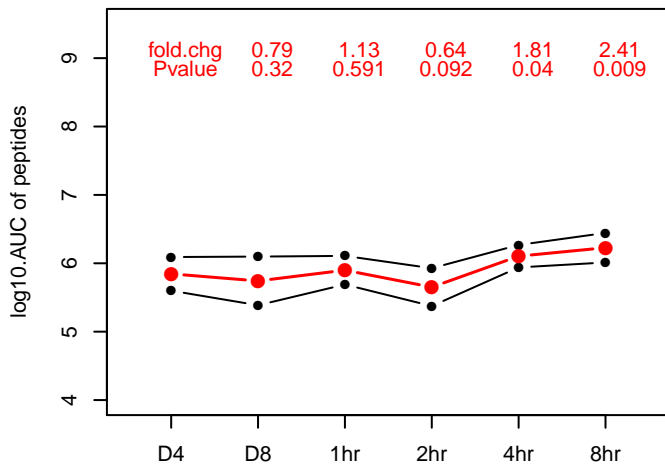

**PDIA4\_HUMAN**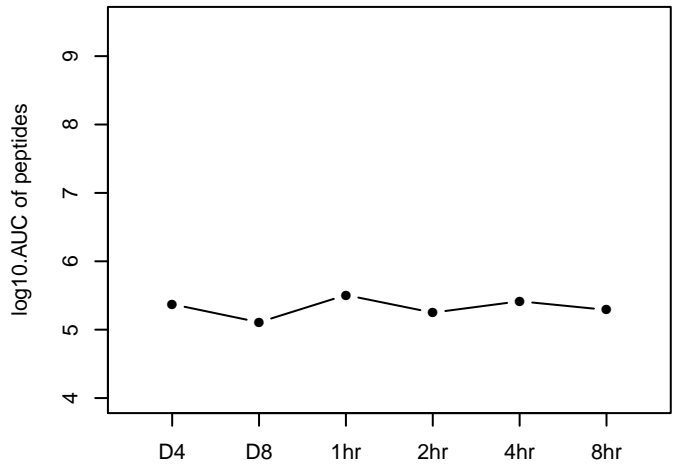**PDS5B\_HUMAN**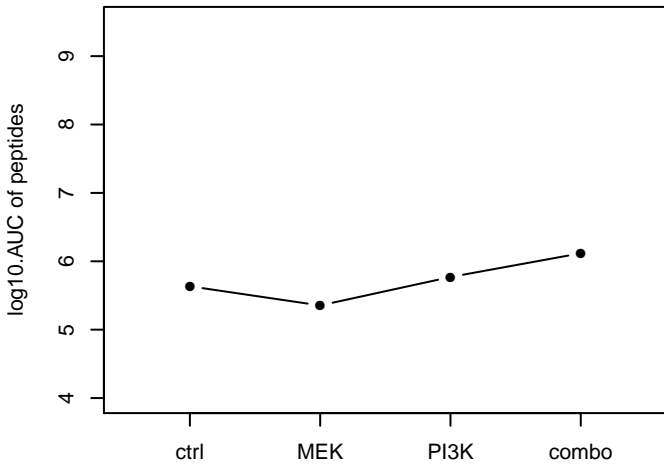**PDS5B\_HUMAN**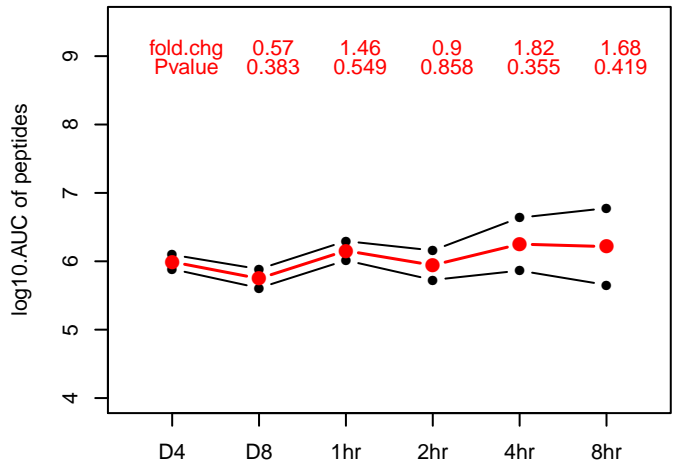**PDXD1\_HUMAN**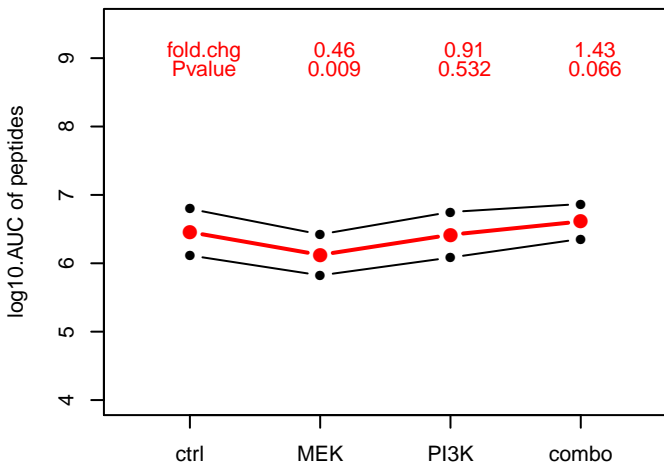**PDXD1\_HUMAN**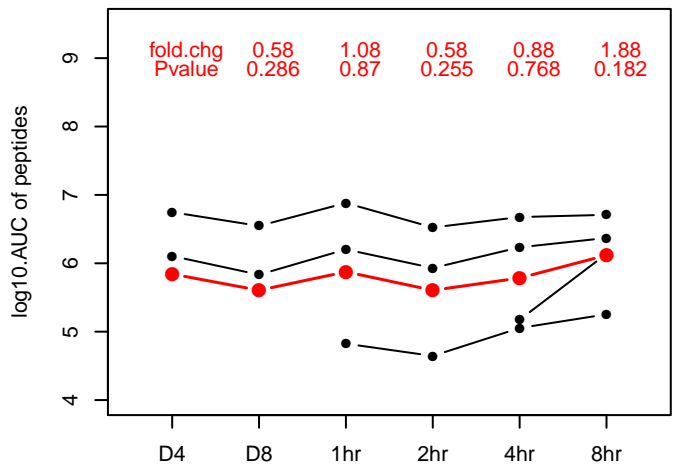

### PEAK1\_HUMAN

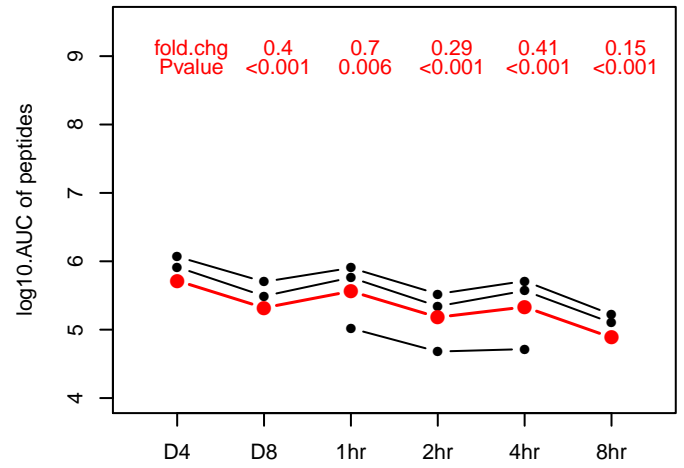

### PER1\_HUMAN

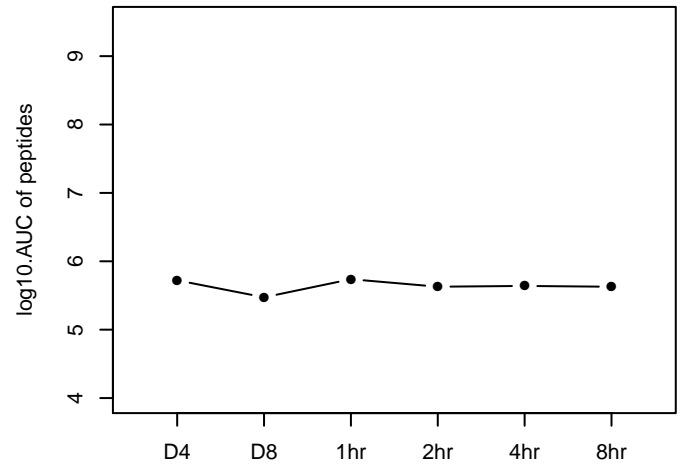

### PGAM5\_HUMAN

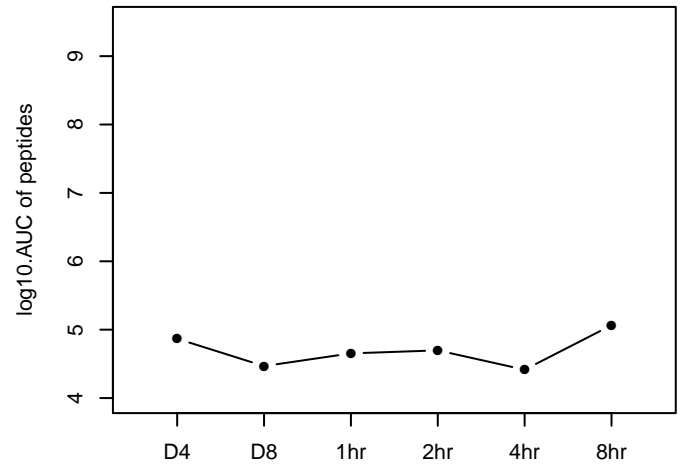

**PGM1\_HUMAN**

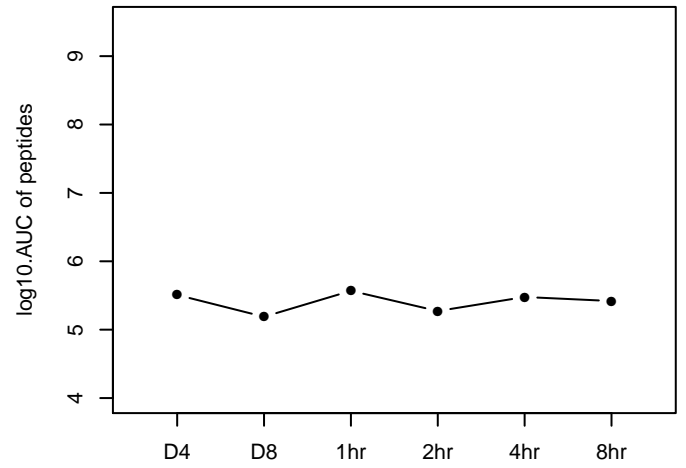

**PHAR4\_HUMAN**

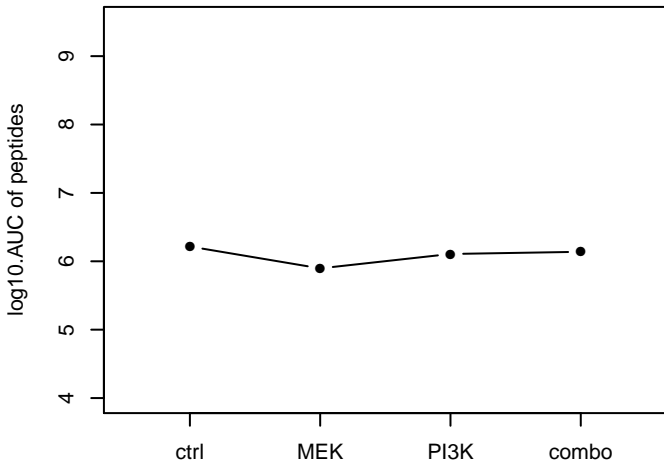

**PHAX\_HUMAN**

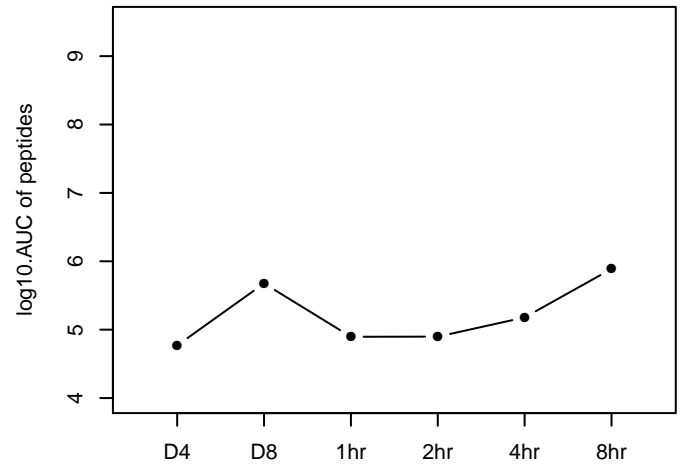

### PHB\_HUMAN

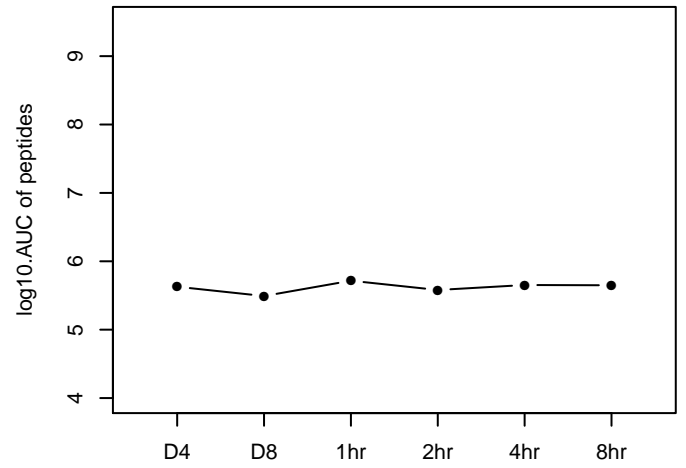

### PHB2\_HUMAN

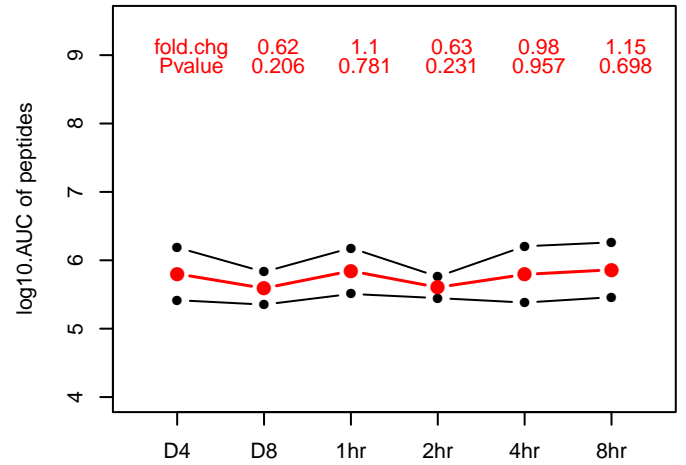

### PHC1\_HUMAN

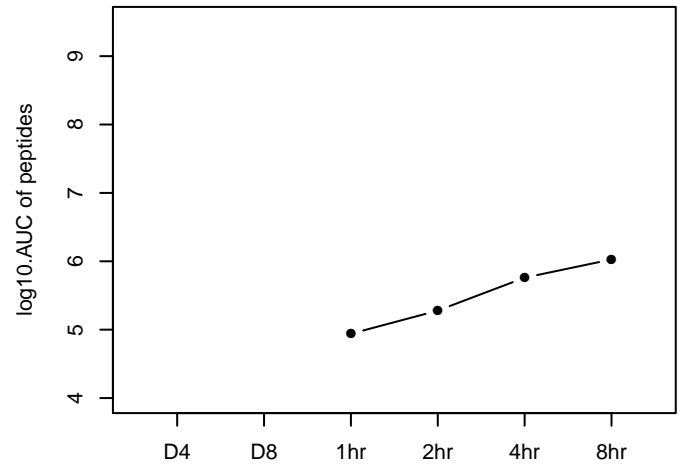

### PHF3\_HUMAN

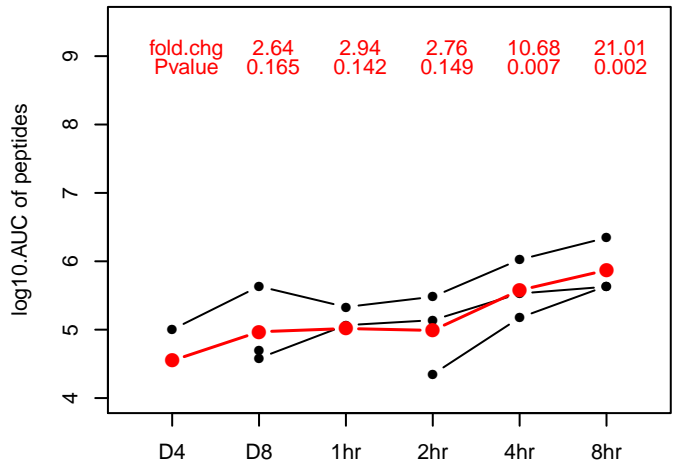

### PHF6\_HUMAN

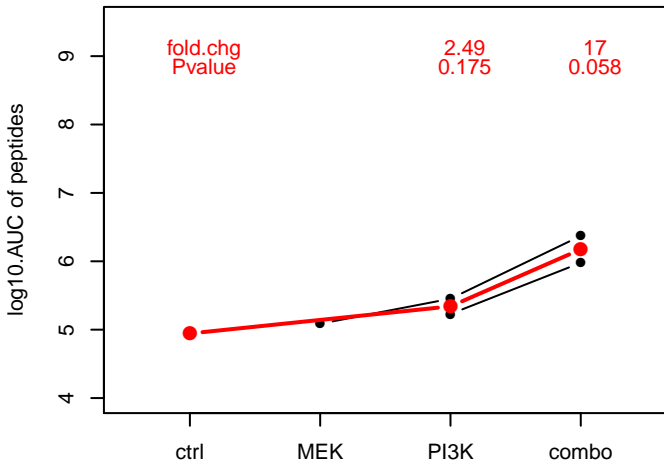

### PHF6\_HUMAN

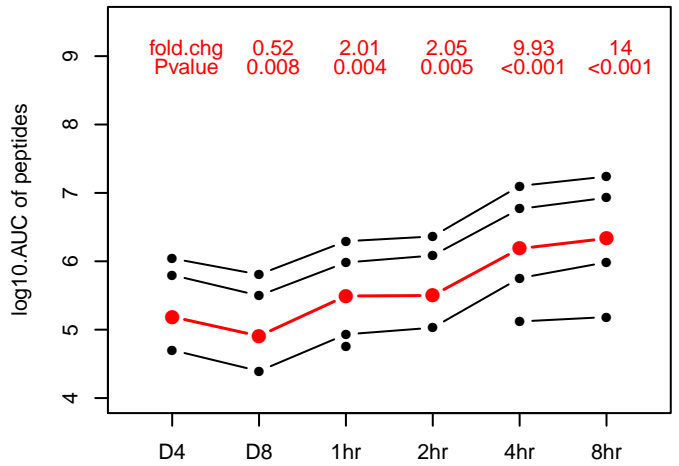

### PHLB1\_HUMAN

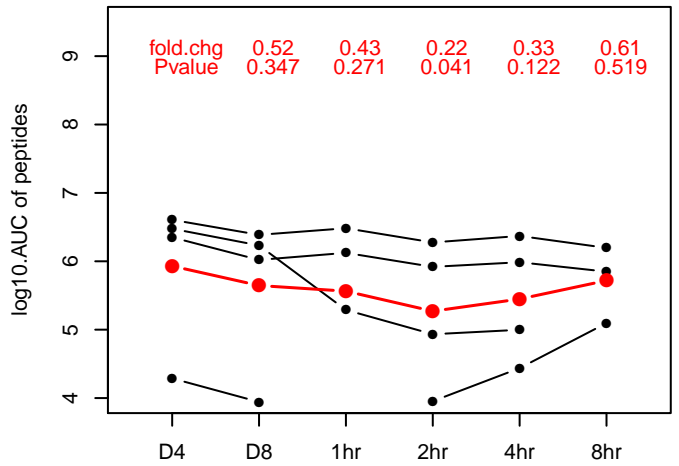

### PHLP\_HUMAN

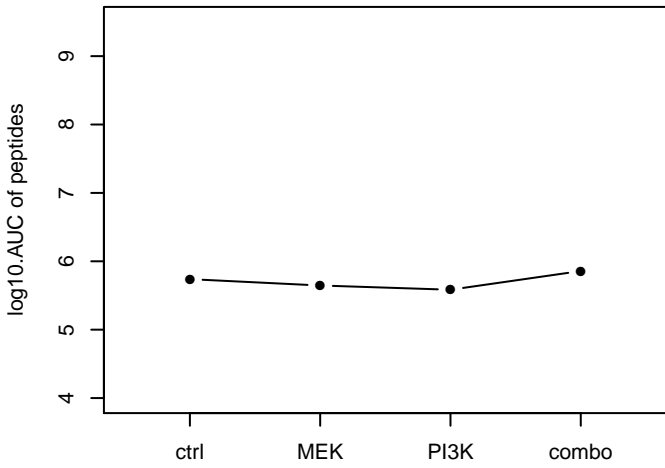

### PI51C\_HUMAN

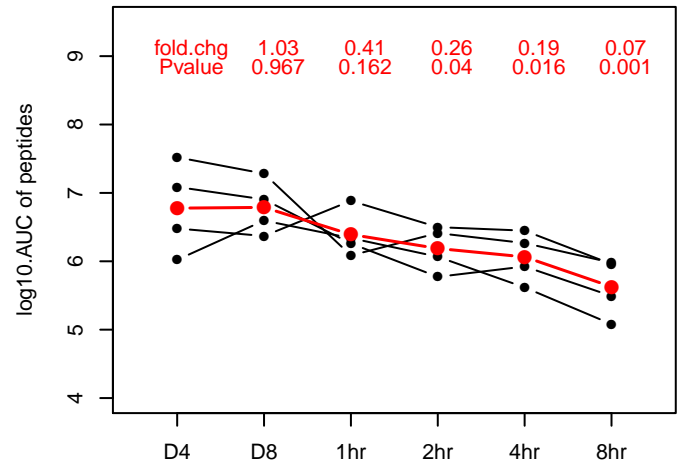

### PIPNA\_HUMAN

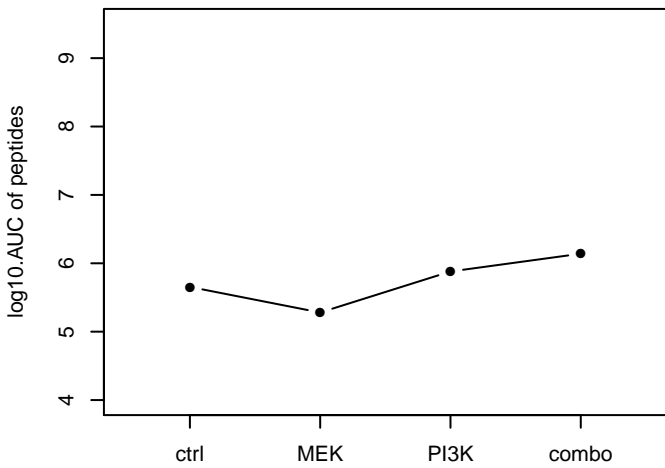

**PKHA3\_HUMAN**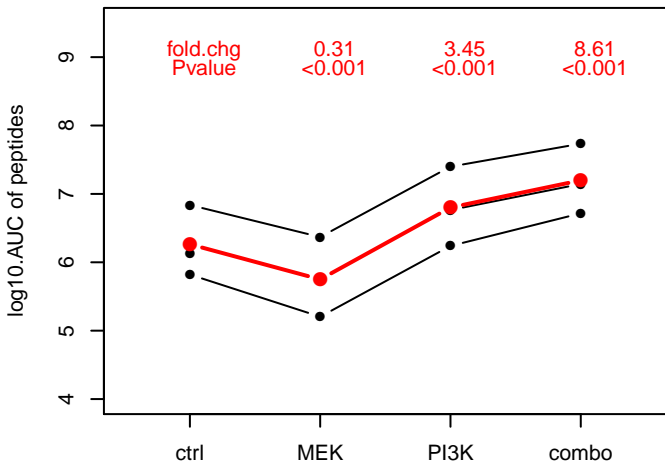**PKHA3\_HUMAN**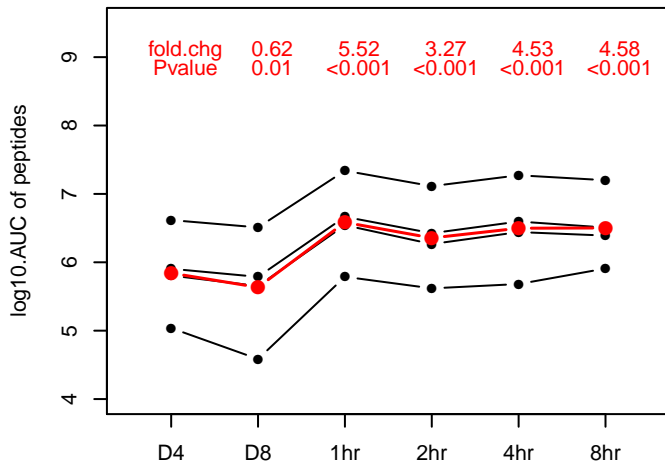**PKHA5\_HUMAN**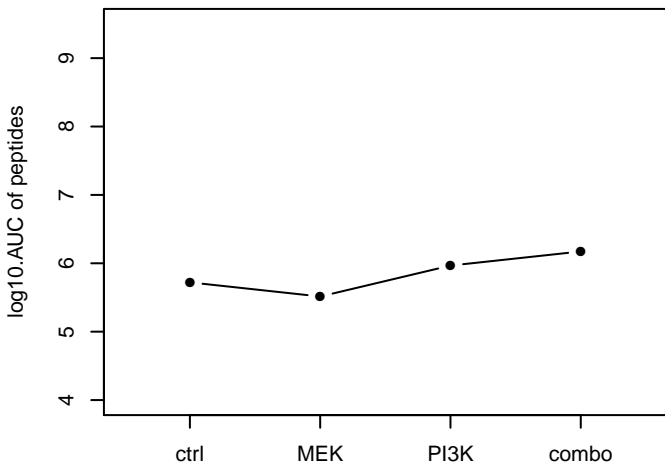**PKHA5\_HUMAN**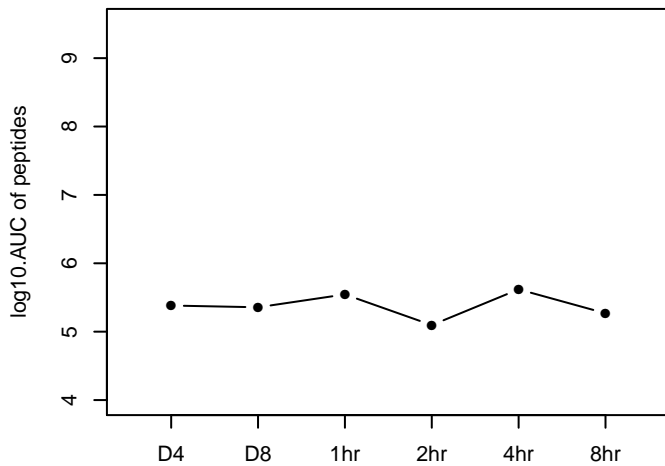**PKHH1\_HUMAN**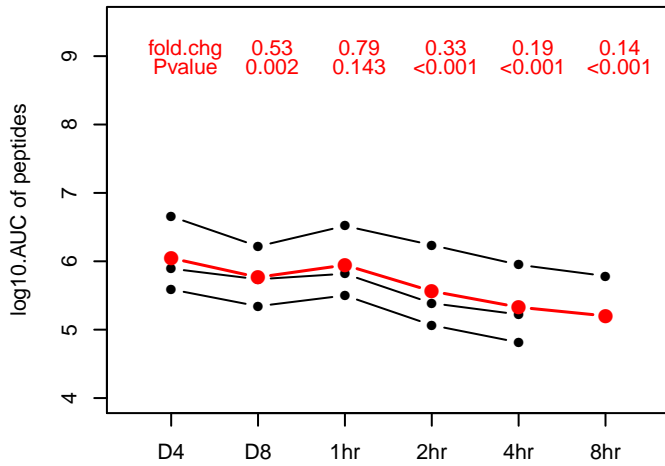



**PKN2\_HUMAN**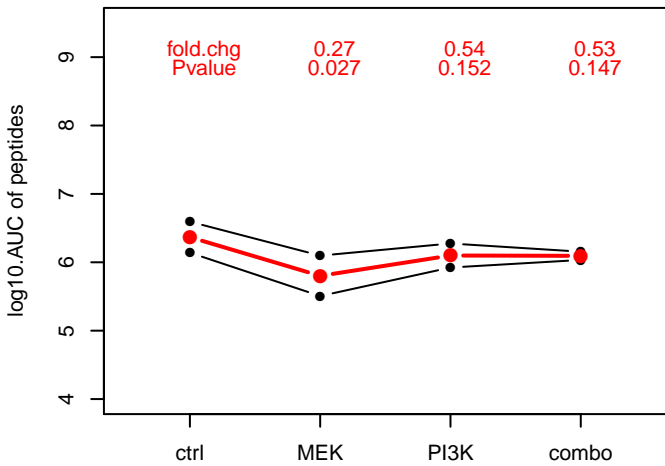**PKN2\_HUMAN**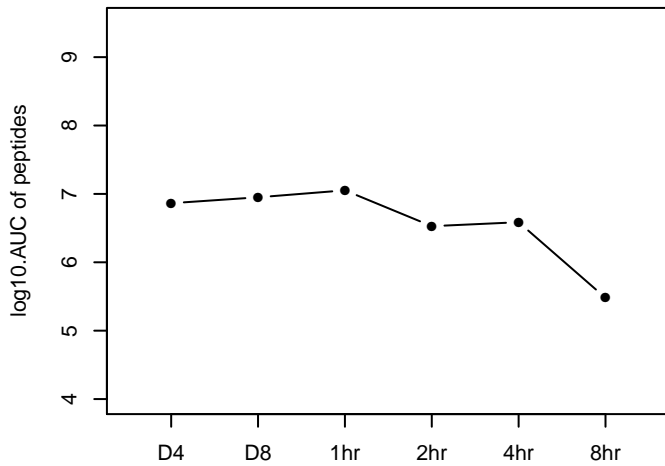**PKN3\_HUMAN**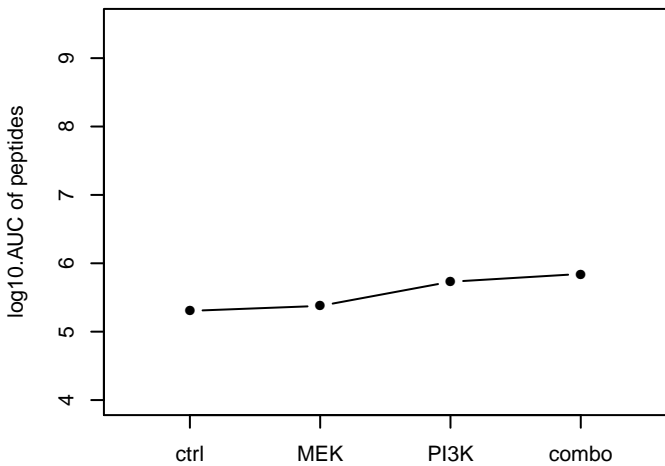**PKN3\_HUMAN**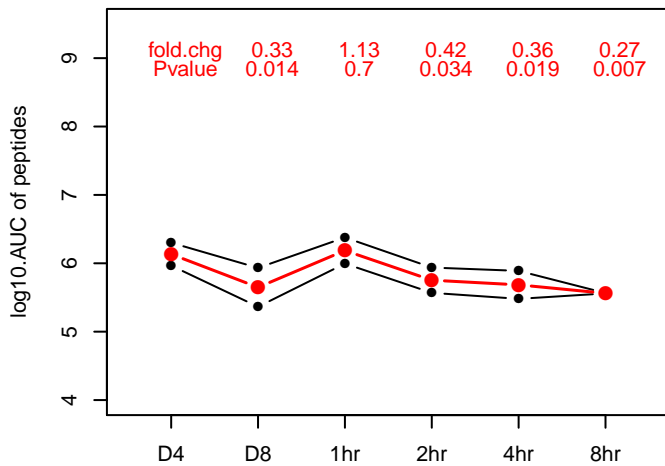**PKP4\_HUMAN**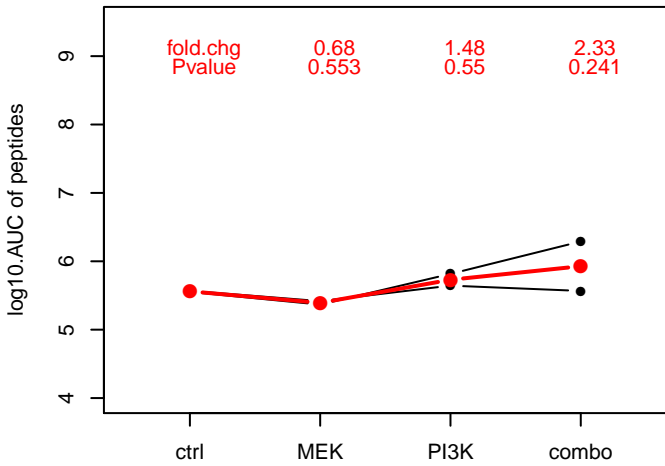**PKP4\_HUMAN**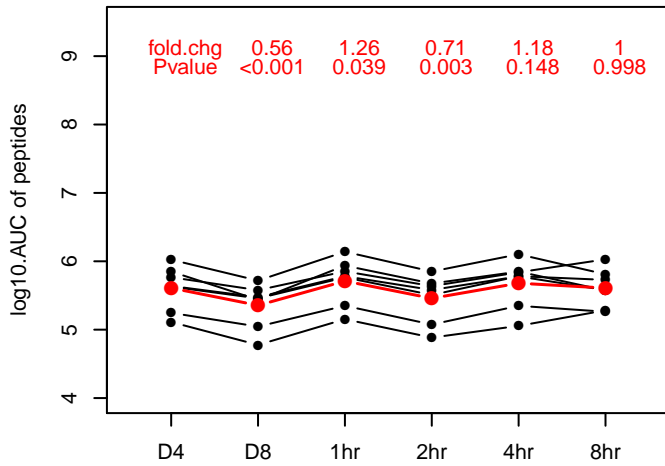

**PLCD3\_HUMAN**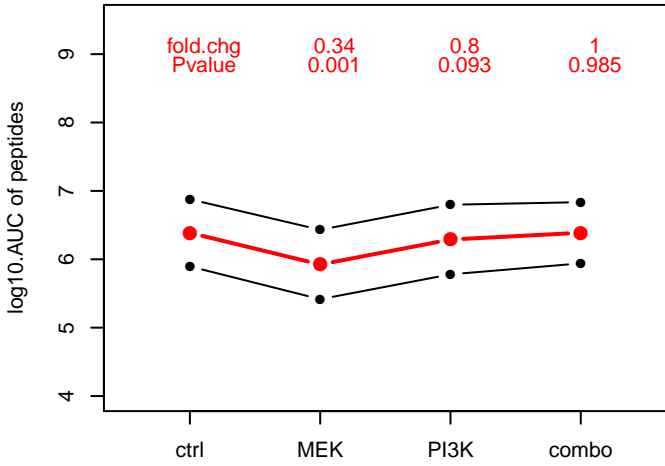**PLCD3\_HUMAN**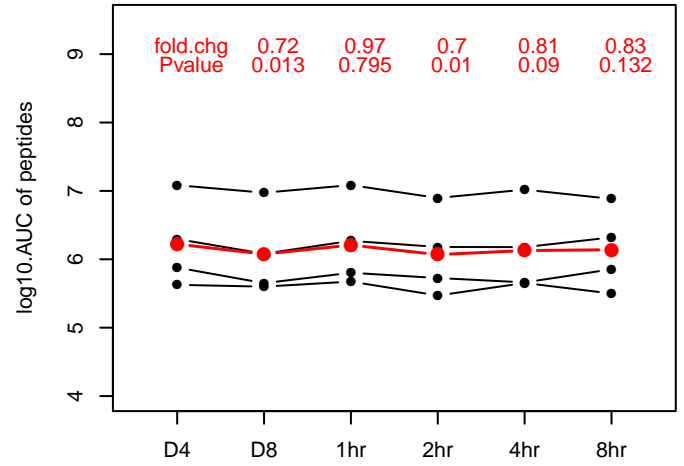**PLCG1\_HUMAN**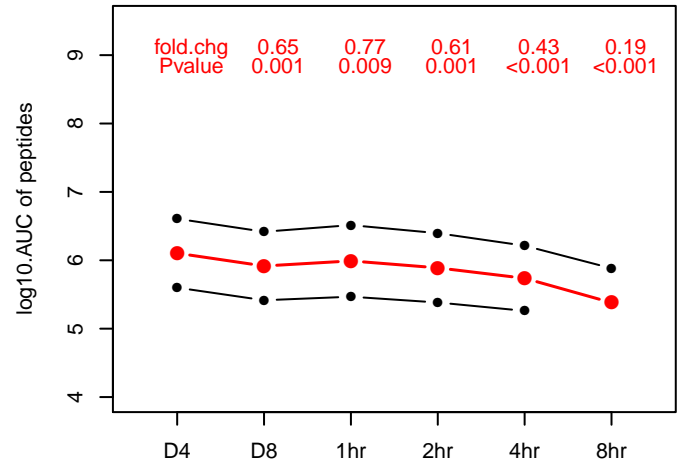**PLEC\_HUMAN**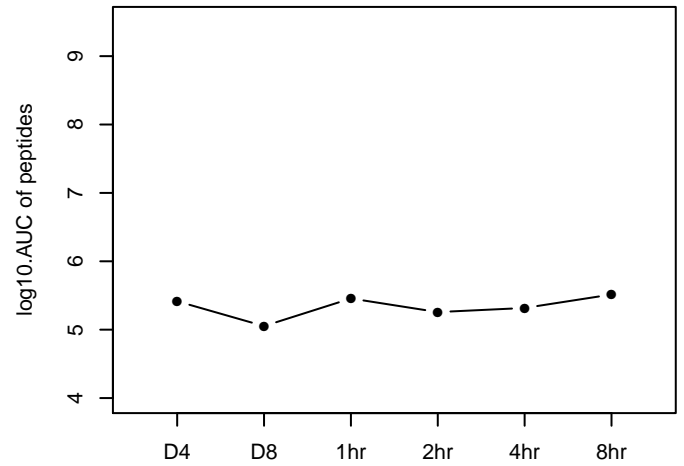

**PLIN5\_HUMAN**

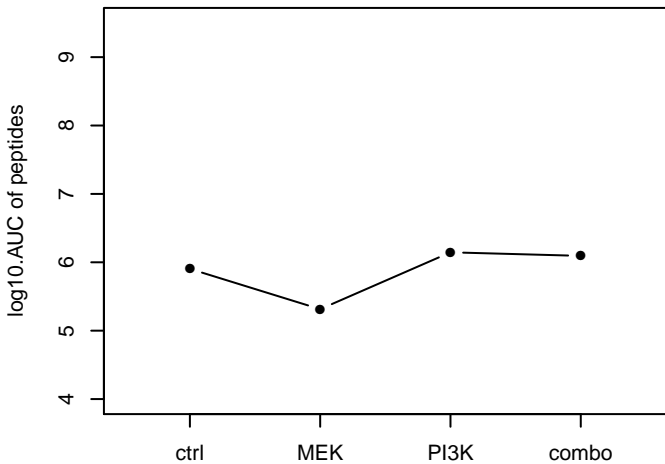

**PLIN5\_HUMAN**

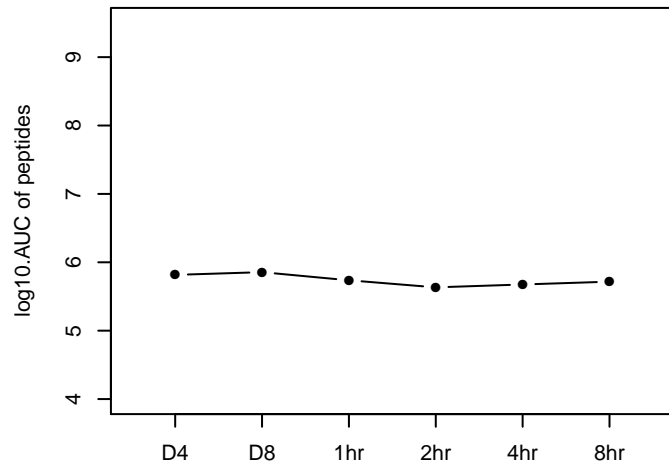

**PLPL6\_HUMAN**

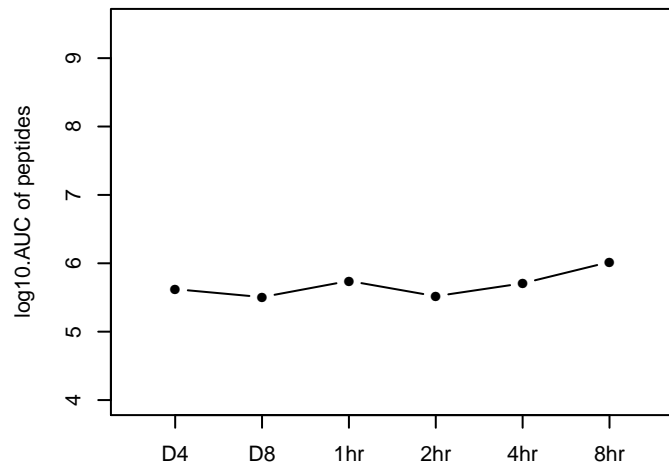

**PLXC1\_HUMAN**

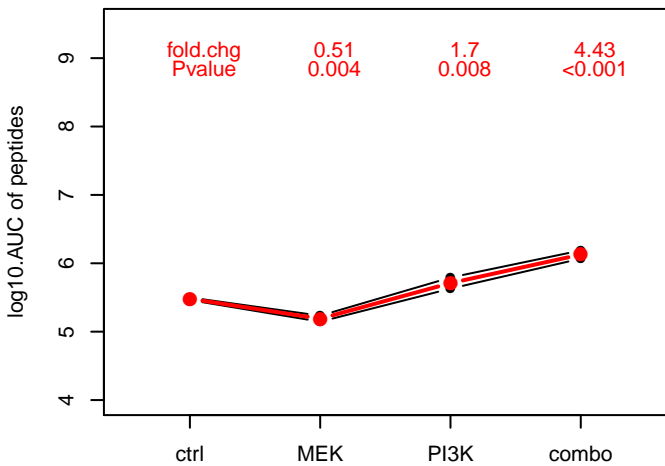

**PLXC1\_HUMAN**

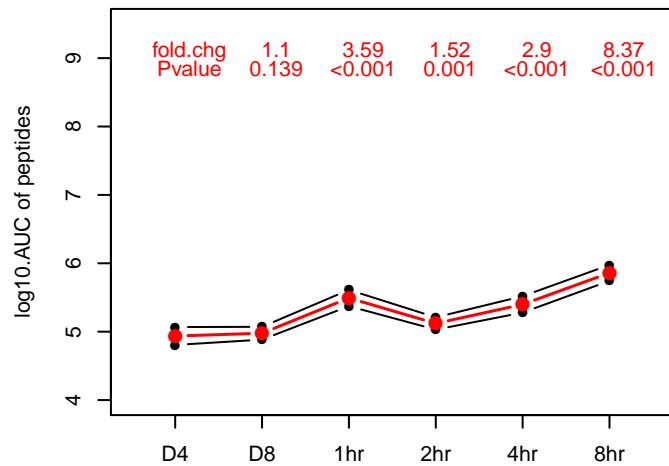

### PML\_HUMAN

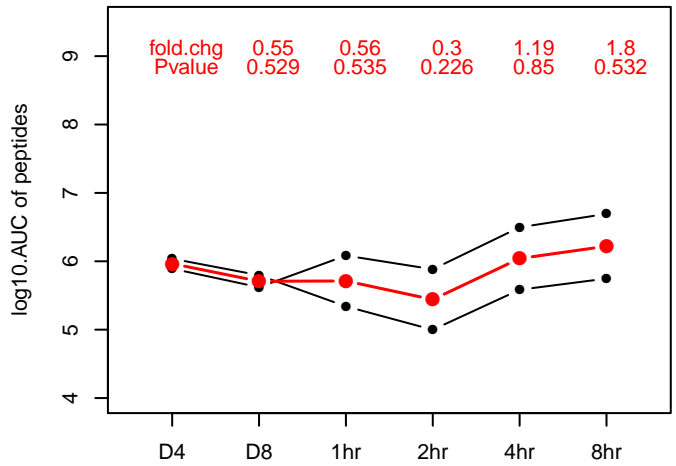

### PMS1\_HUMAN

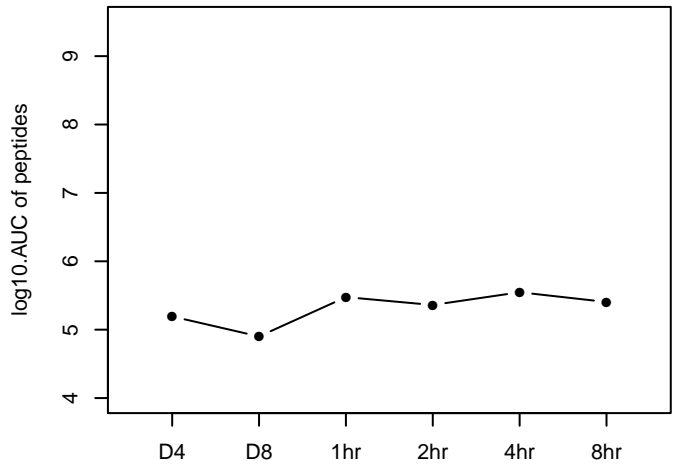

### PMS2\_HUMAN

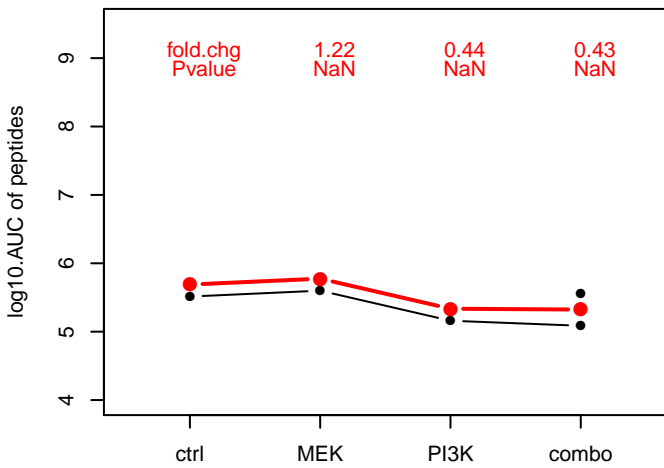

### PMS2\_HUMAN

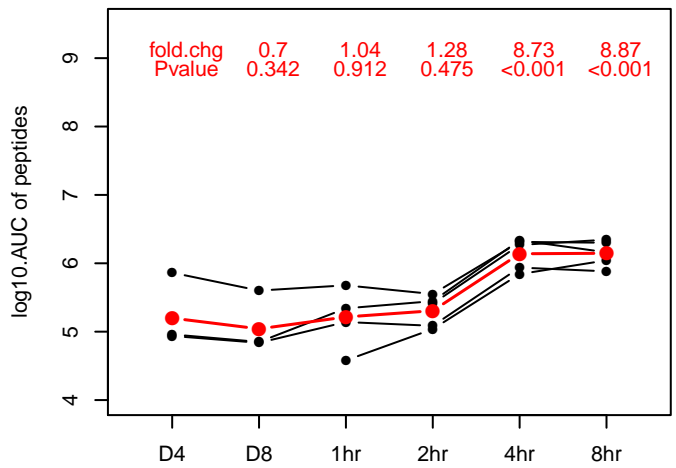

**POGZ\_HUMAN**

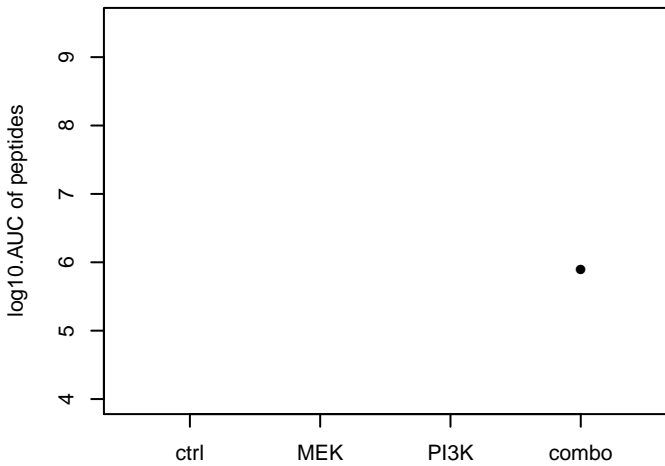

**POGZ\_HUMAN**

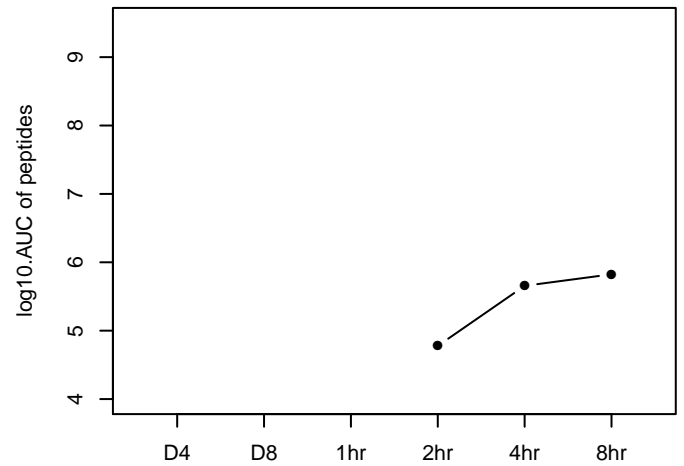

**POP1\_HUMAN**

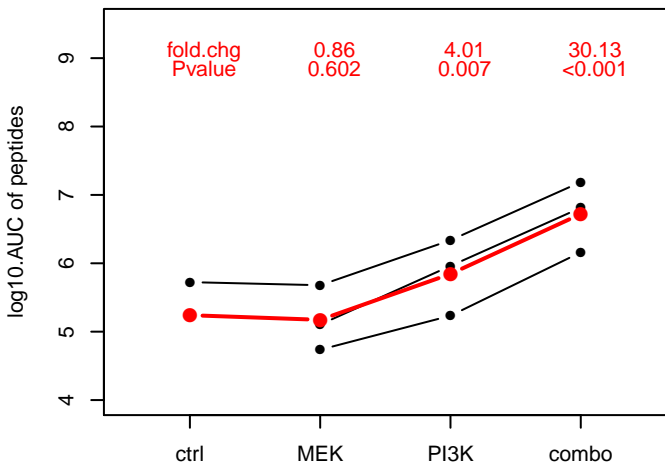

**POP1\_HUMAN**

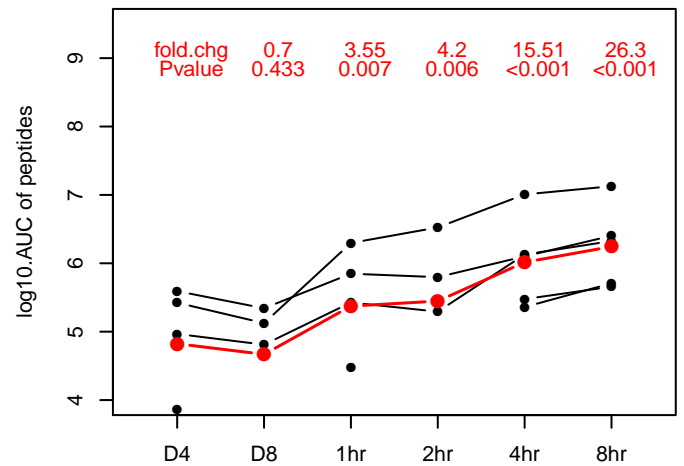

**PP12C\_HUMAN**

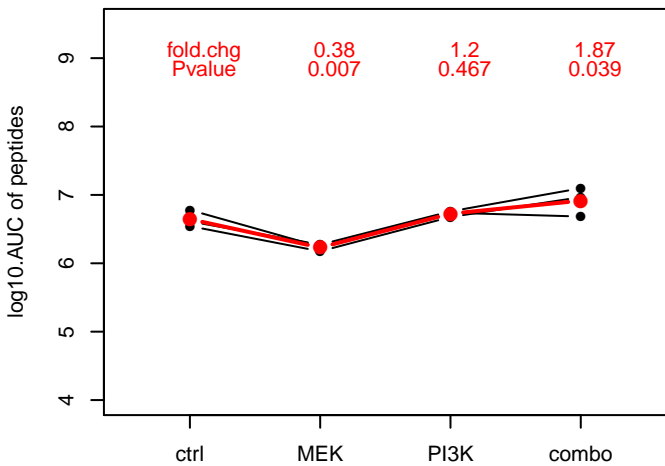

**PP12C\_HUMAN**

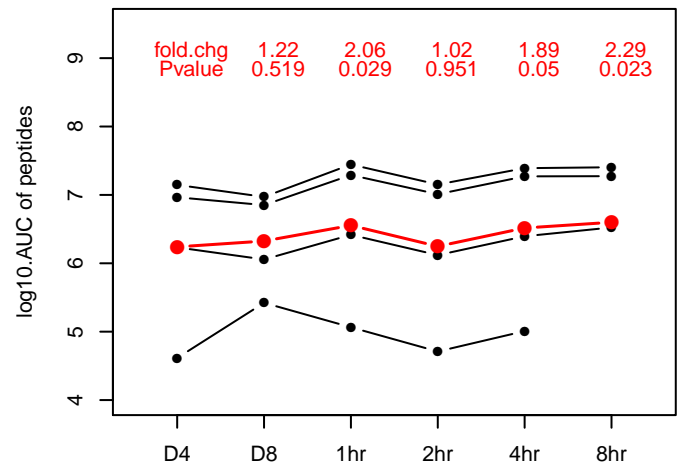

### PP1R7\_HUMAN

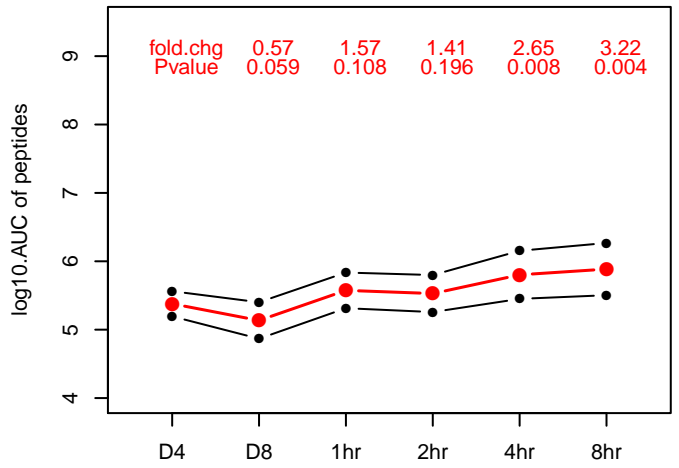

### PP2AA\_HUMAN

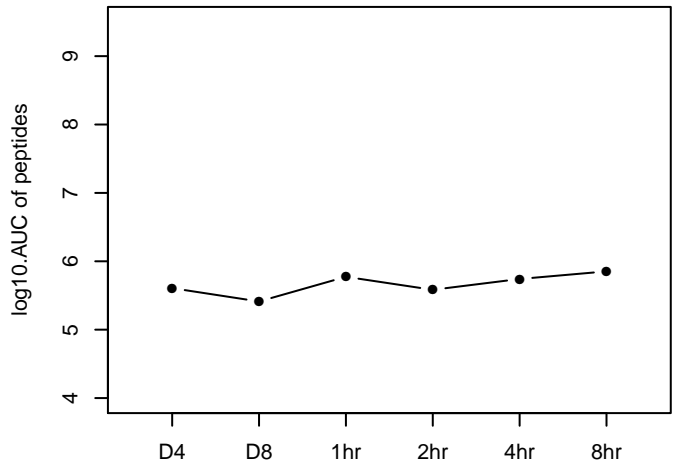

### PP6R3\_HUMAN

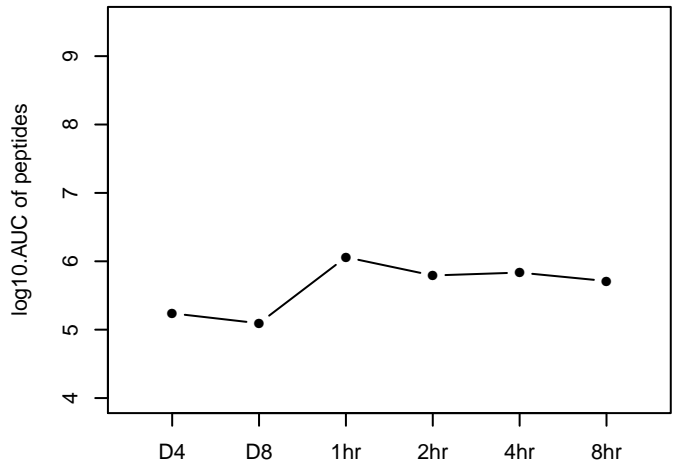

### PPIA\_HUMAN

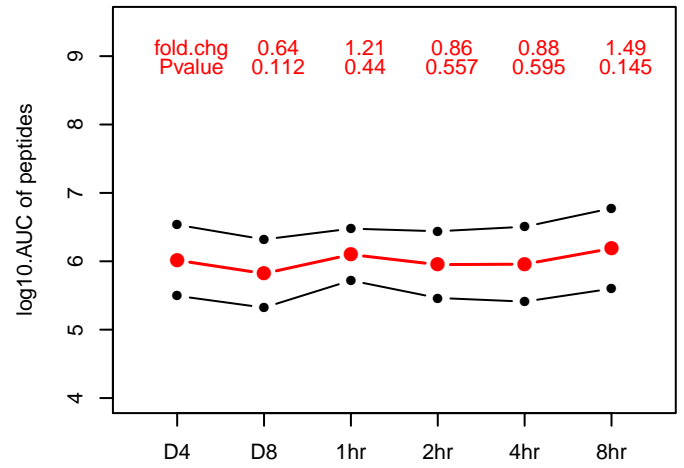

### PPIB\_HUMAN

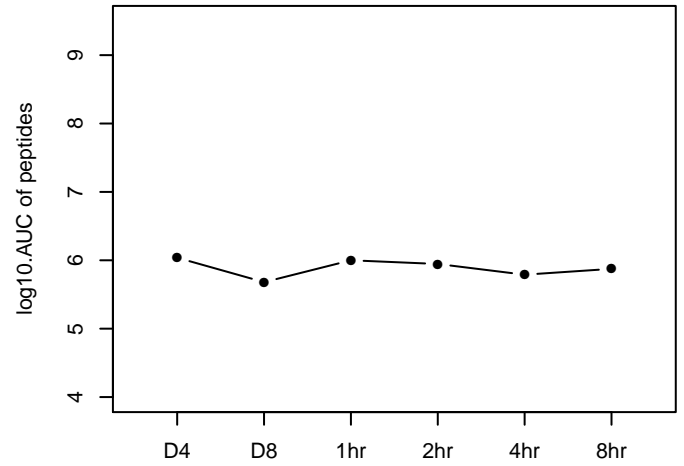

### PPIE\_HUMAN

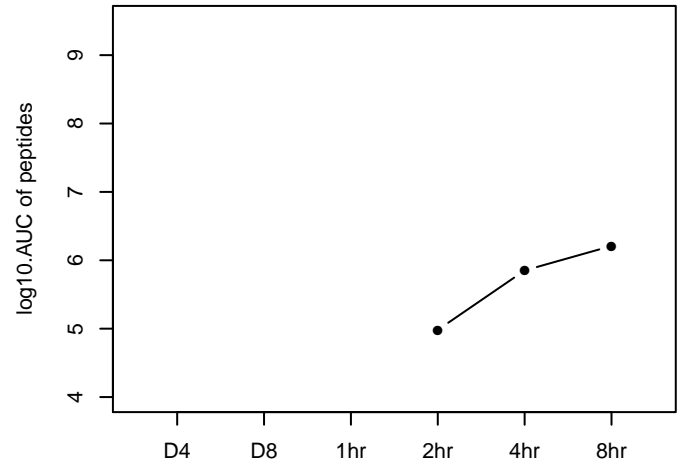

### PPM1G\_HUMAN

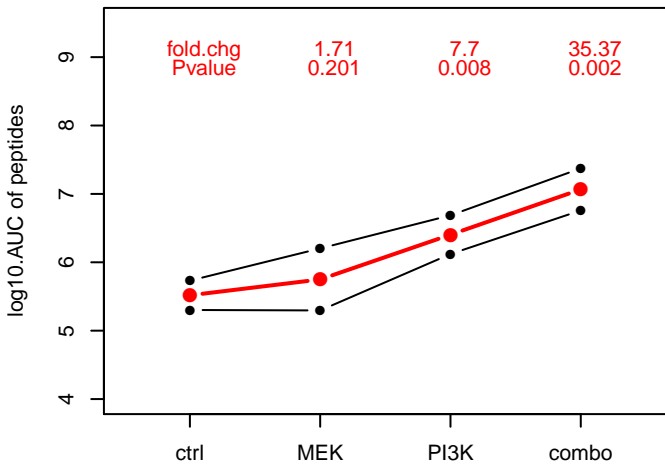

### PPM1G\_HUMAN

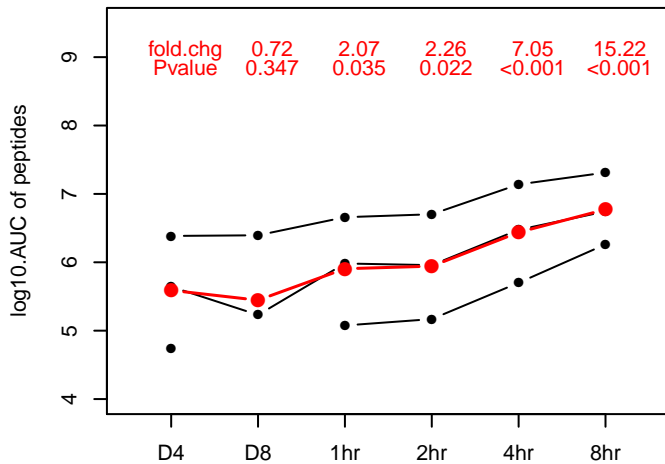

### PR38B\_HUMAN

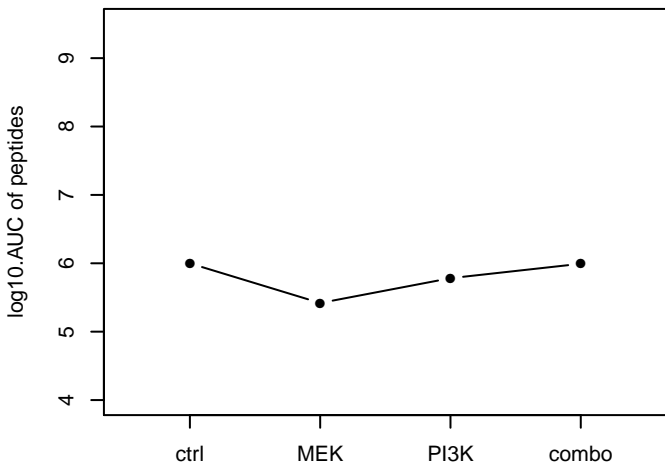

### PR38B\_HUMAN

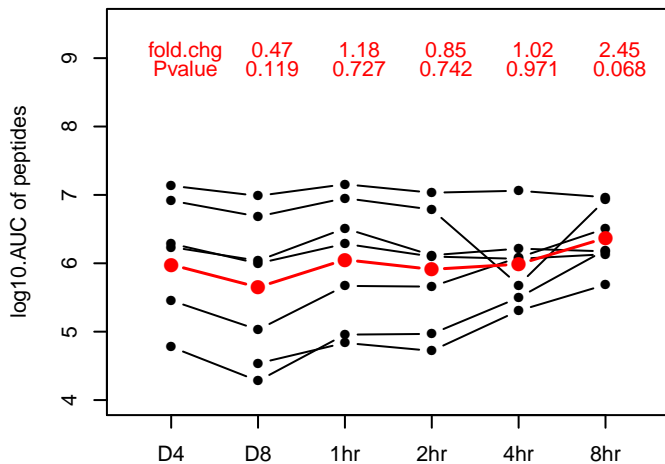

### PRC2C\_HUMAN

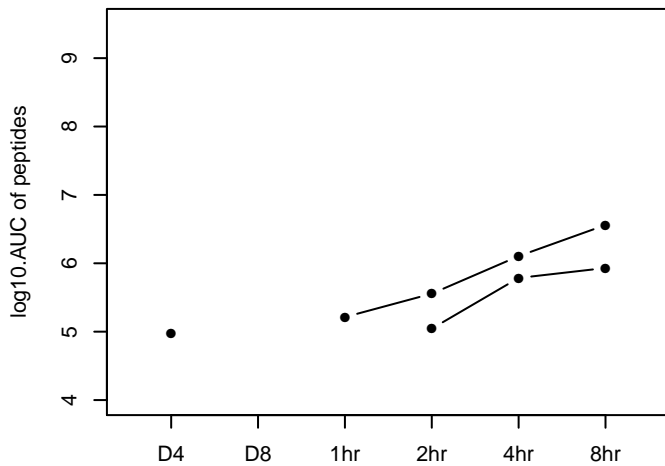



### PRKDC\_HUMAN

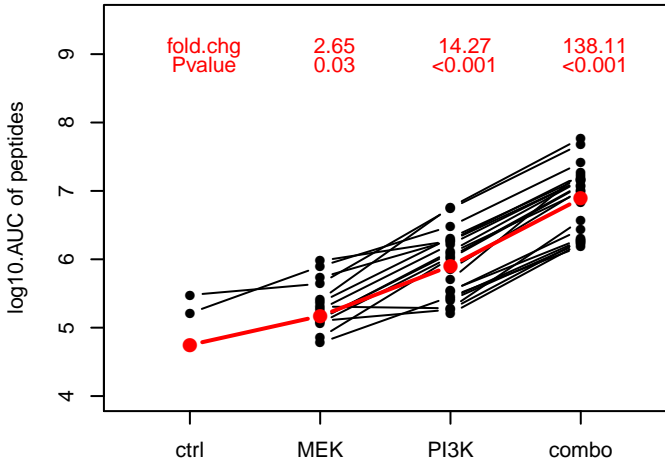

### PRKDC\_HUMAN

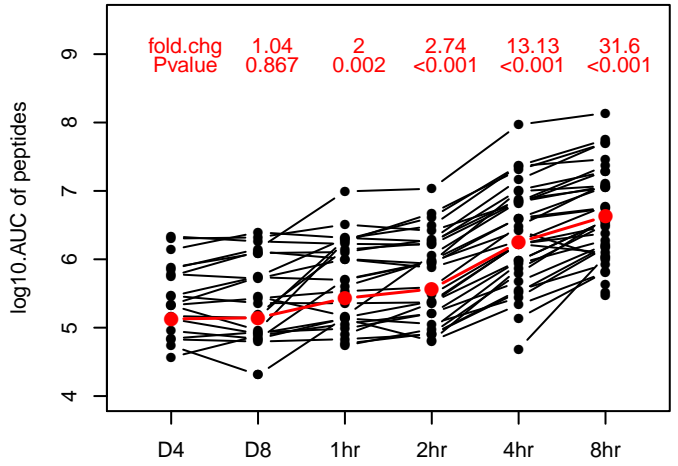

### PRP4B\_HUMAN

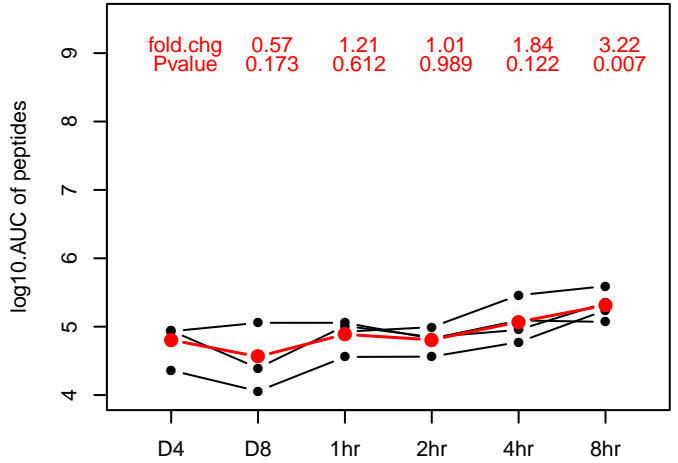

### PRP8\_HUMAN

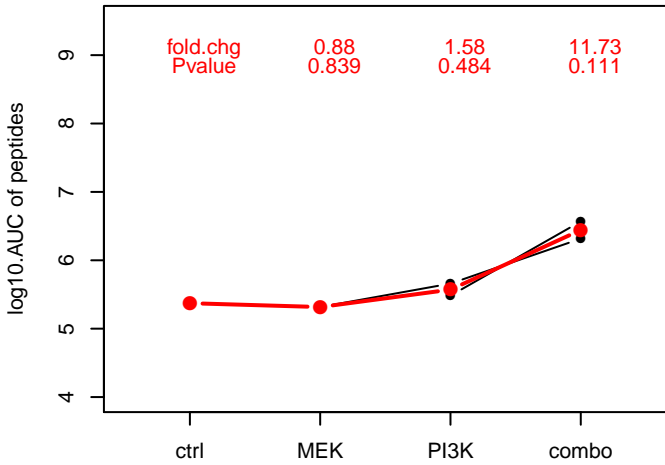

### PRP8\_HUMAN

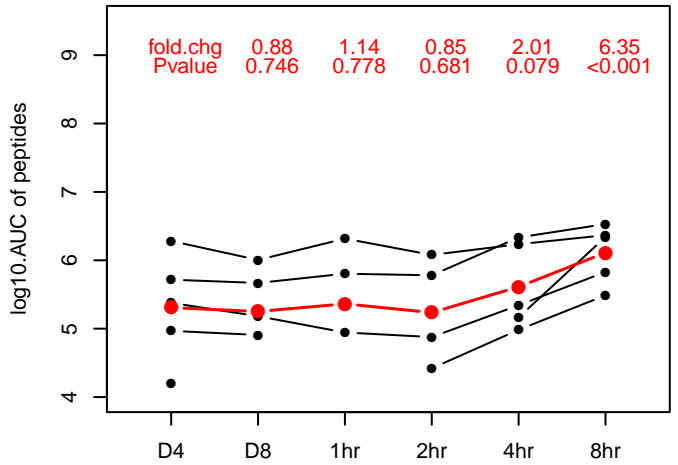

**PRS4\_HUMAN**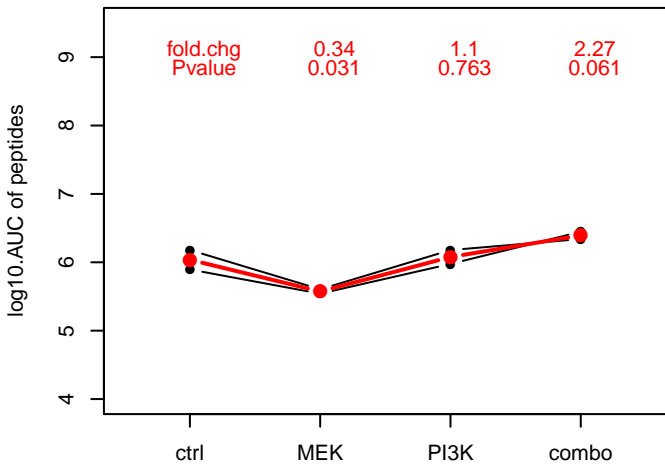**PRS4\_HUMAN**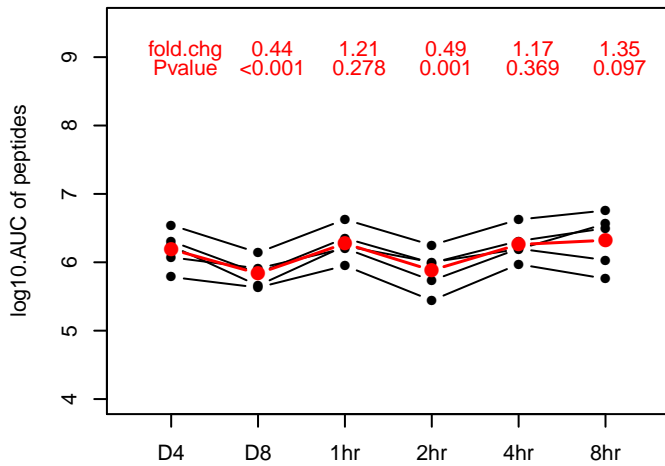**PRUN2\_HUMAN**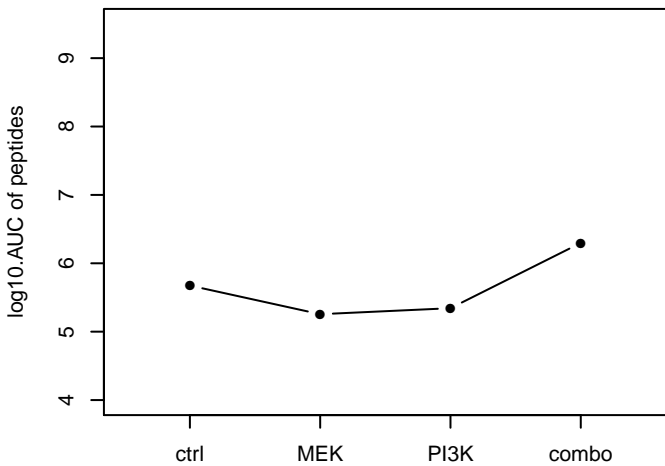**PRUN2\_HUMAN**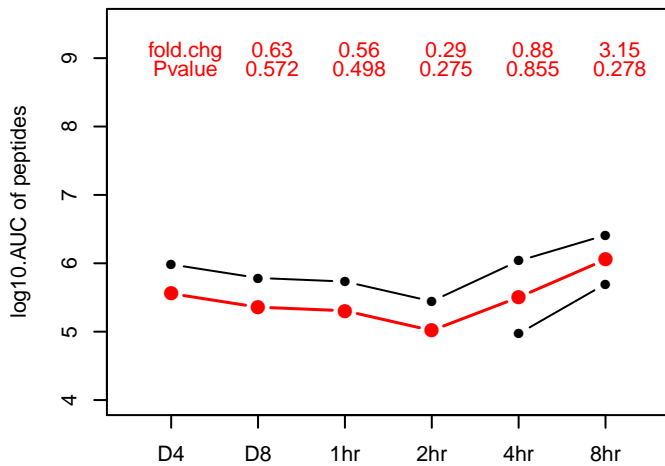**PSA1\_HUMAN**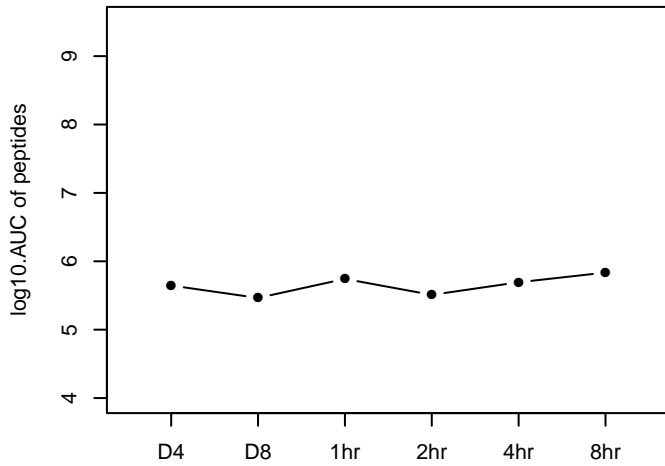

**PSF2\_HUMAN**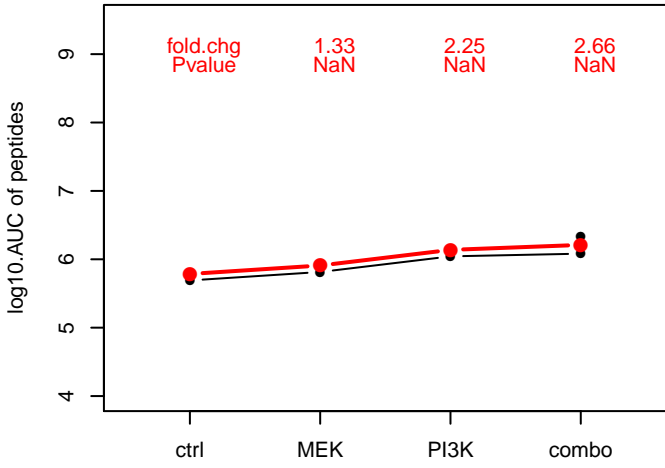**PSF2\_HUMAN**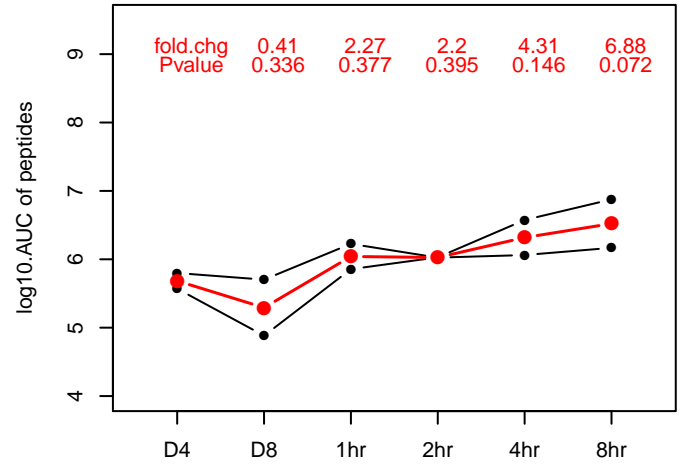**PSF3\_HUMAN**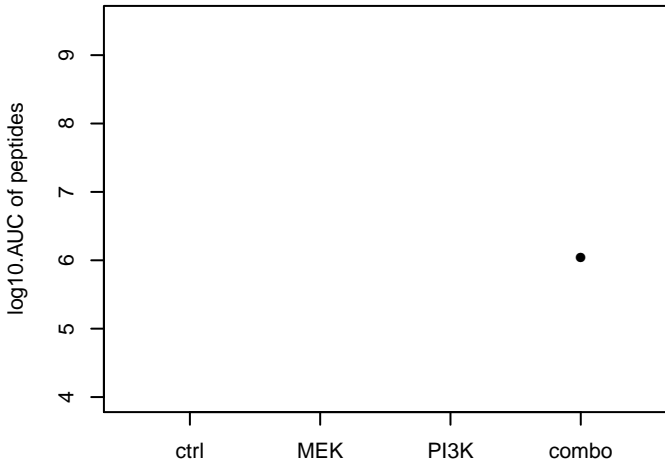**PSF3\_HUMAN**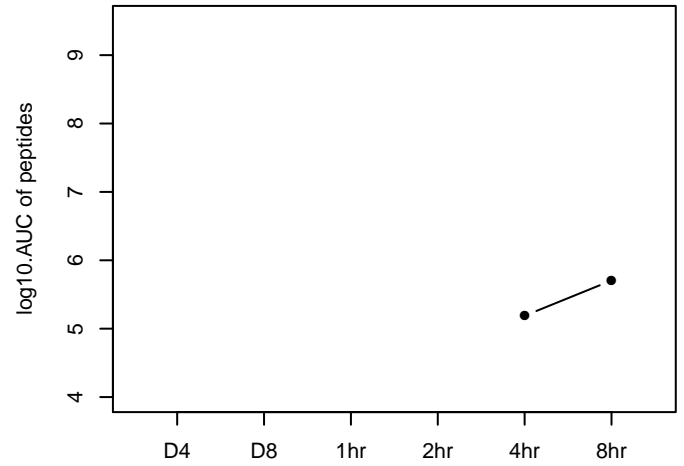**PSIP1\_HUMAN**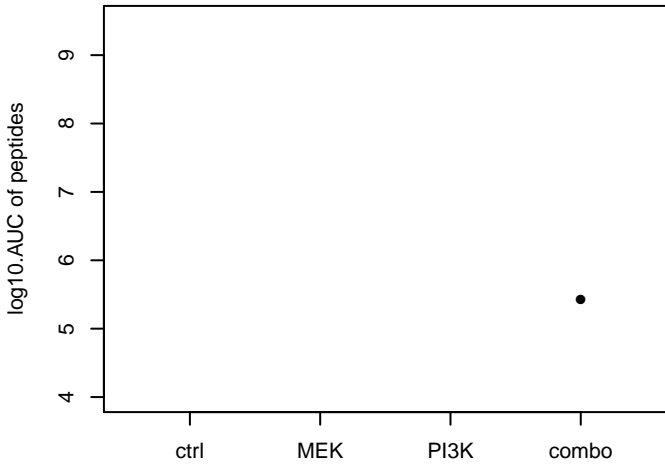

**PSMD4\_HUMAN**

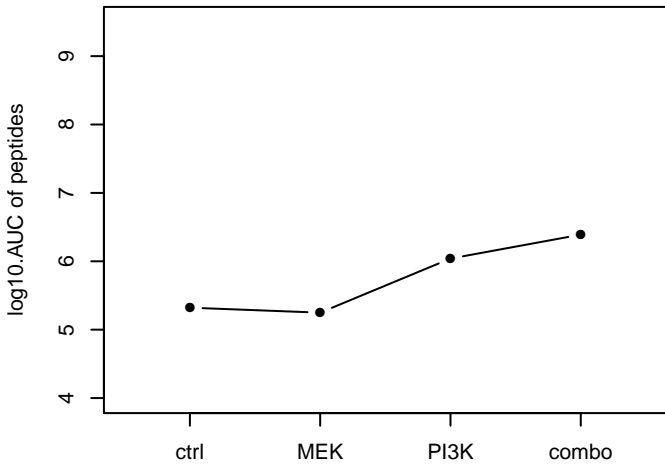

**PSMD9\_HUMAN**

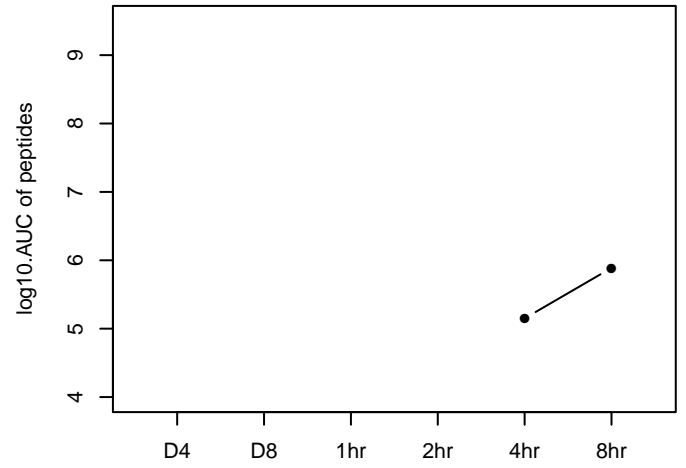

**PTAR1\_HUMAN**

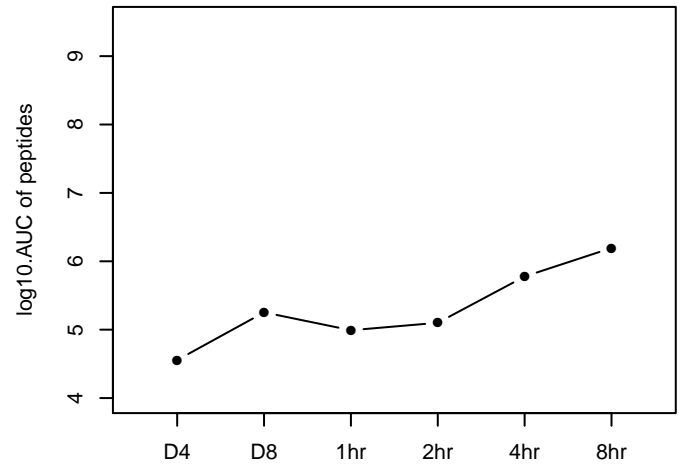

**PTN23\_HUMAN**

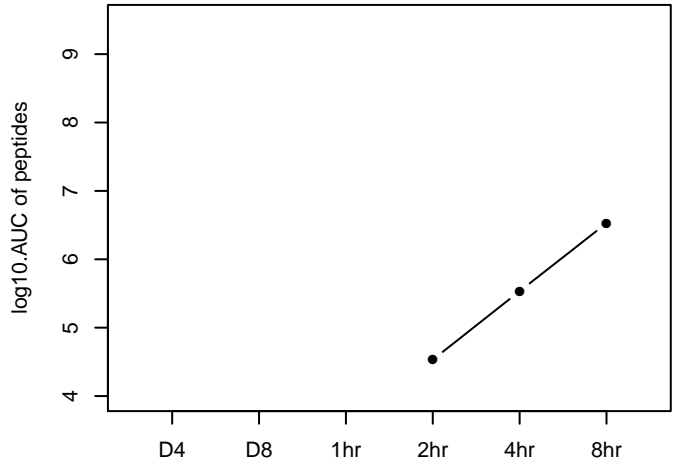

**PURA\_HUMAN**

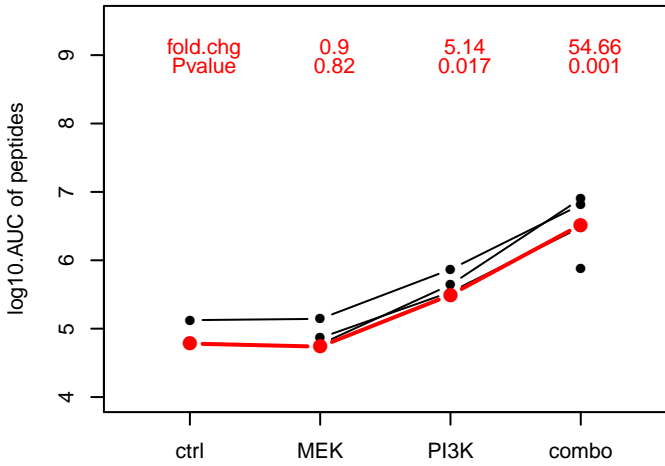

**PURA\_HUMAN**

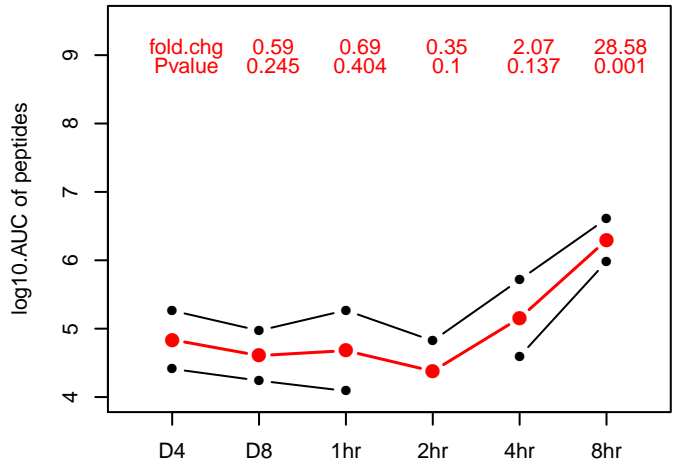

**PVRL2\_HUMAN**

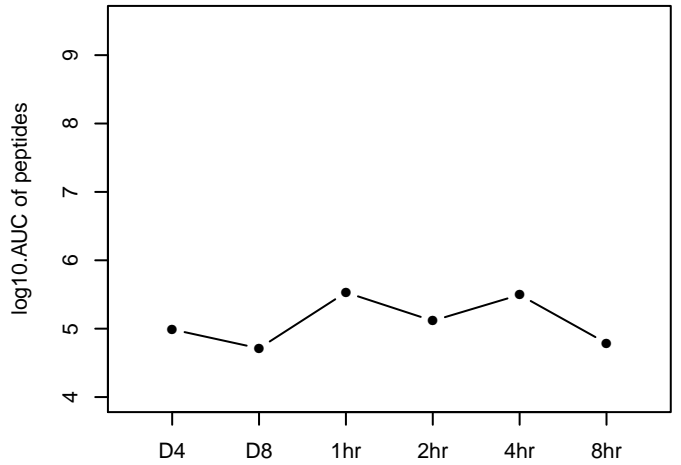

### PYR1\_HUMAN

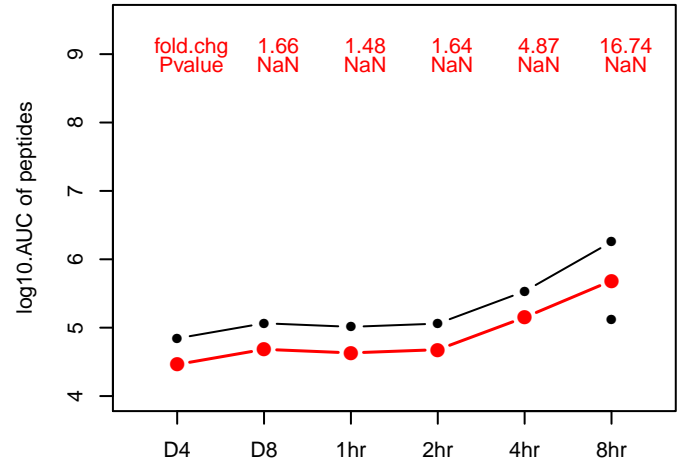

### Q05D56\_HUMAN

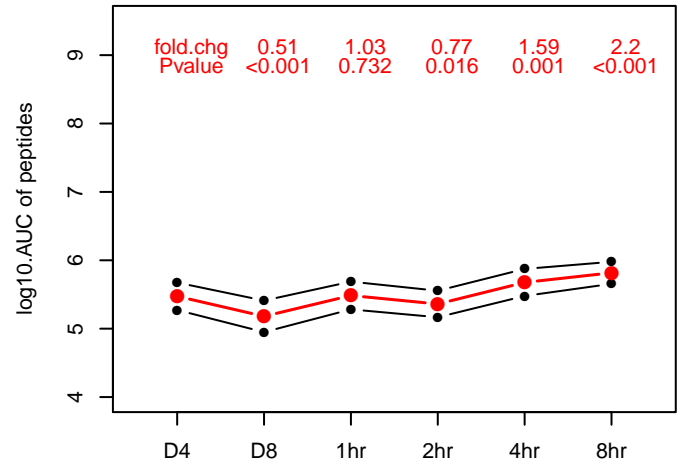

### RAB28\_HUMAN

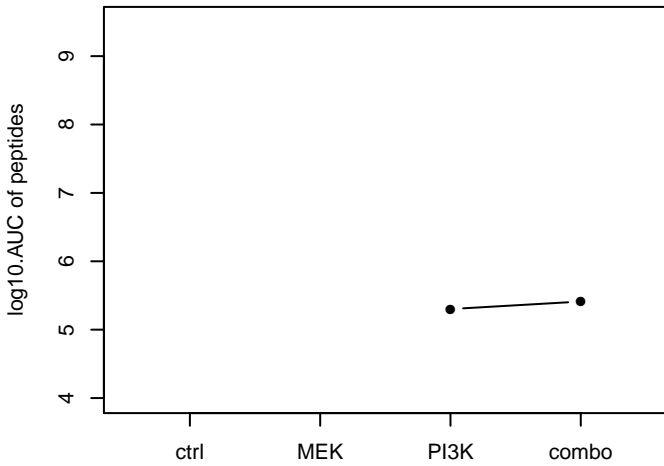

### RAB32\_HUMAN

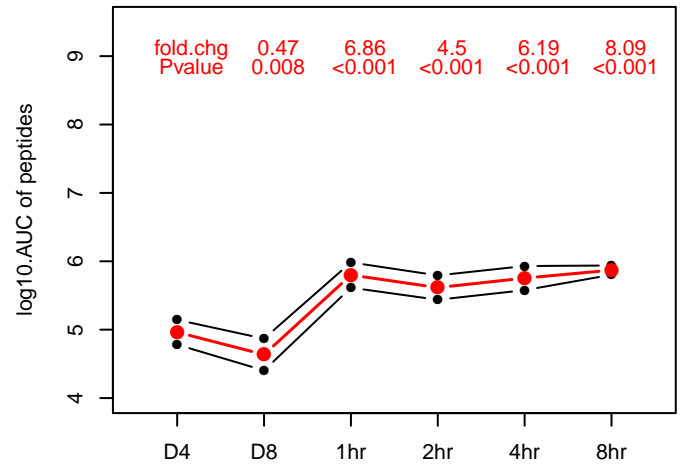

### RABE1\_HUMAN

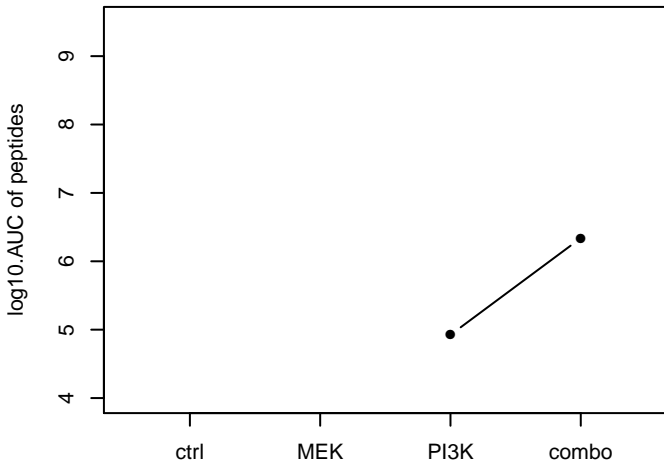

### RABE1\_HUMAN

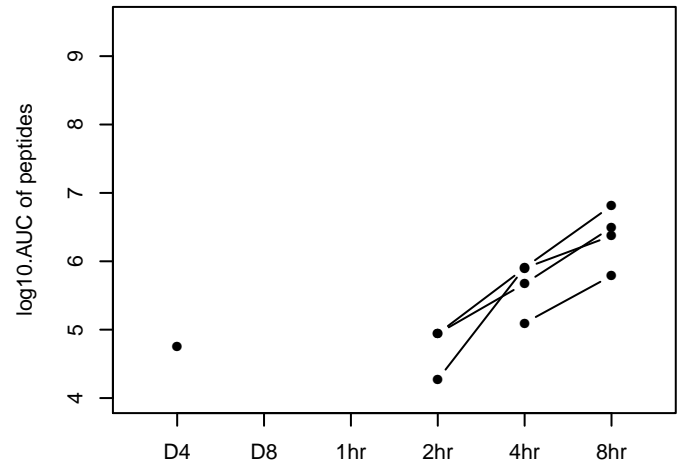

### RAC1\_HUMAN

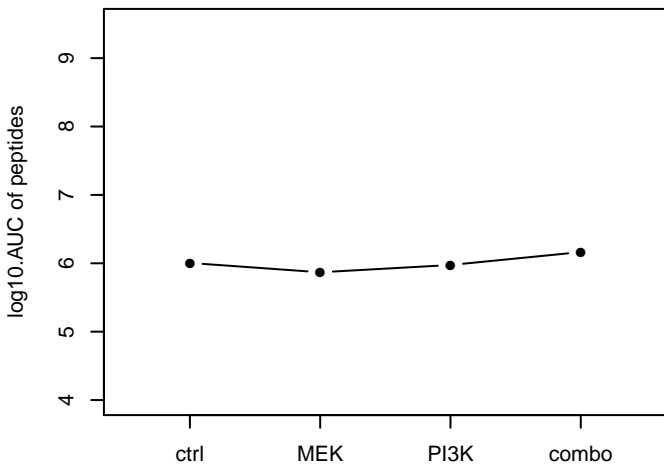

### RAC1\_HUMAN

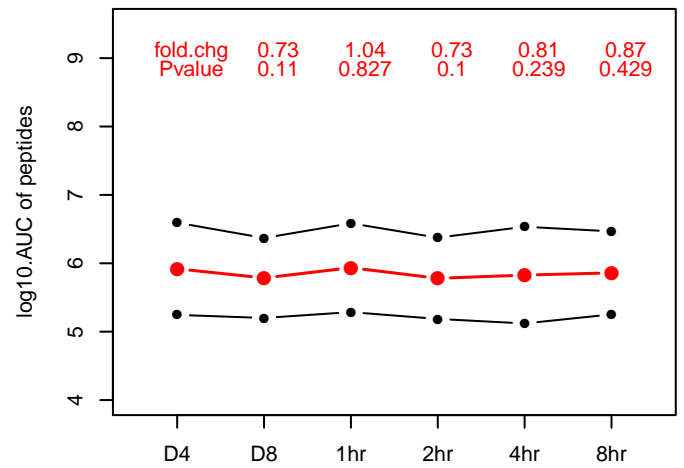

### RAD18\_HUMAN

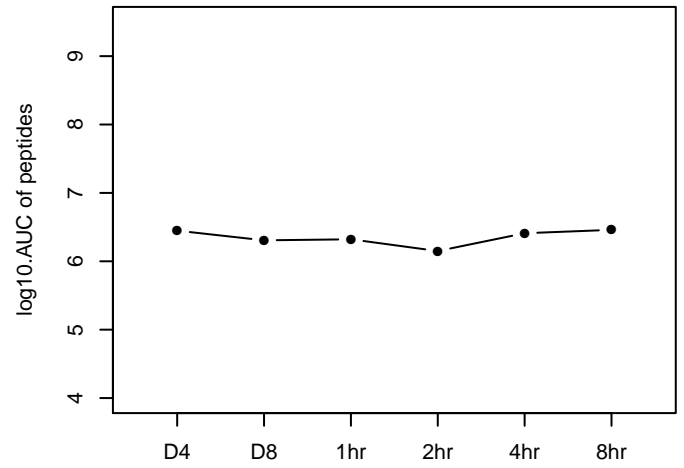

### RAD50\_HUMAN

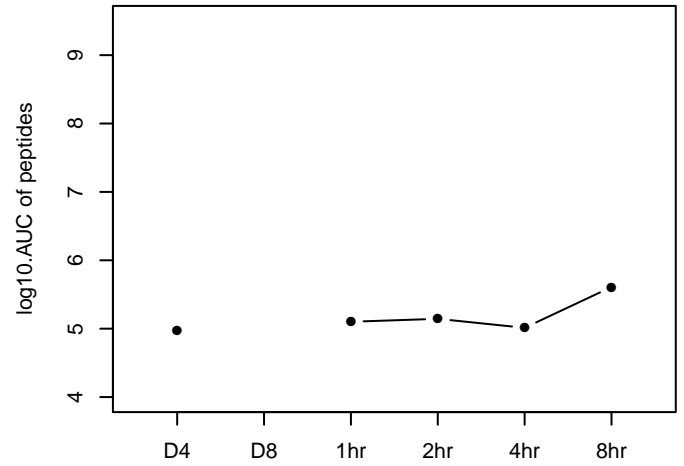

### RADI\_HUMAN

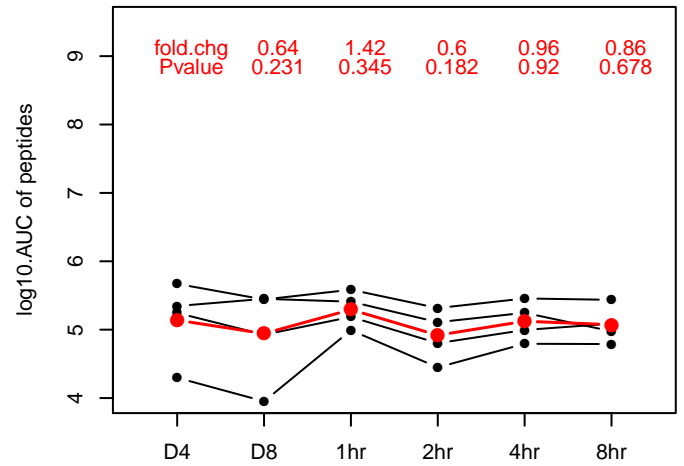



### RAF1\_HUMAN

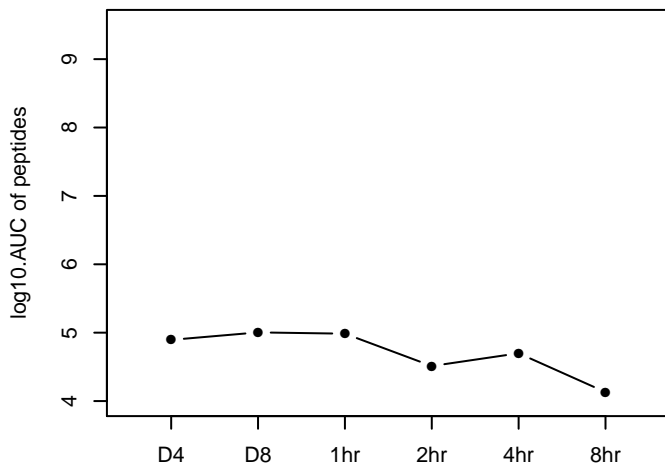

### RAI1\_HUMAN

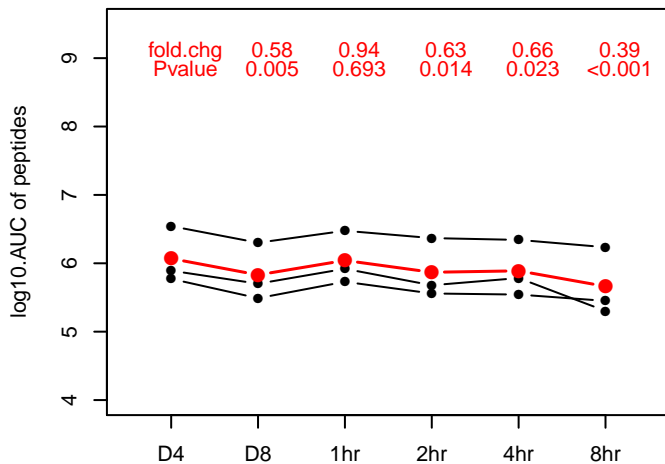

### RAI14\_HUMAN

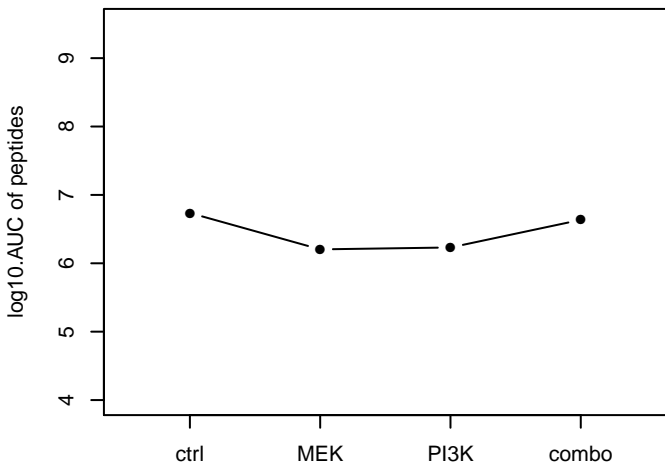

### RAI14\_HUMAN

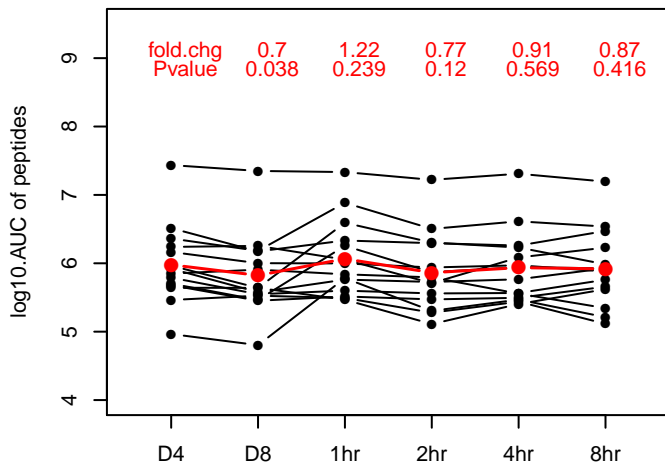

### RAI3\_HUMAN

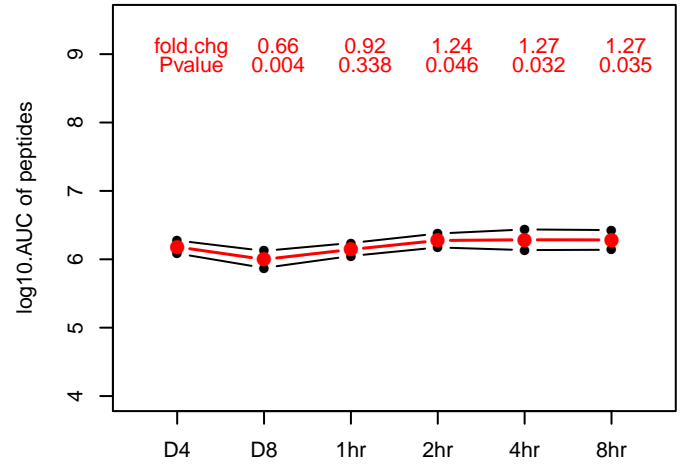

### RALY\_HUMAN

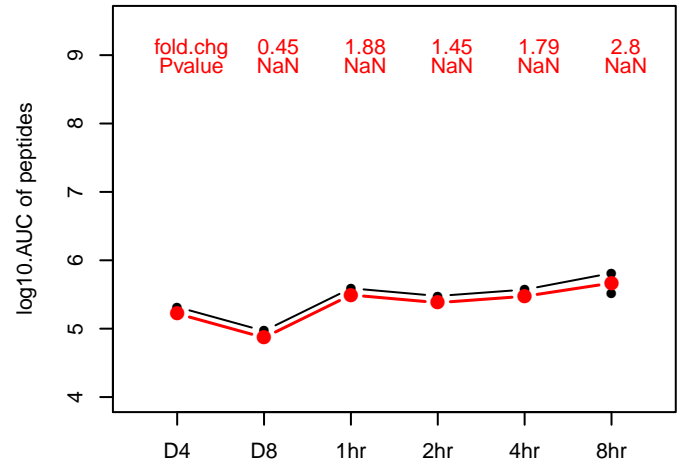

### RANB9\_HUMAN

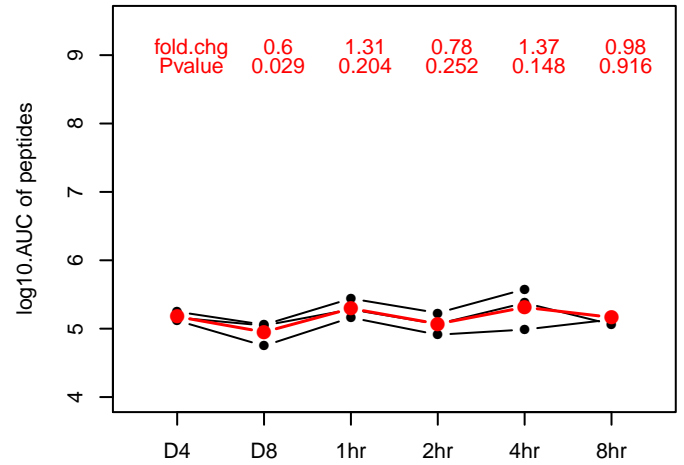

**RBCC1\_HUMAN**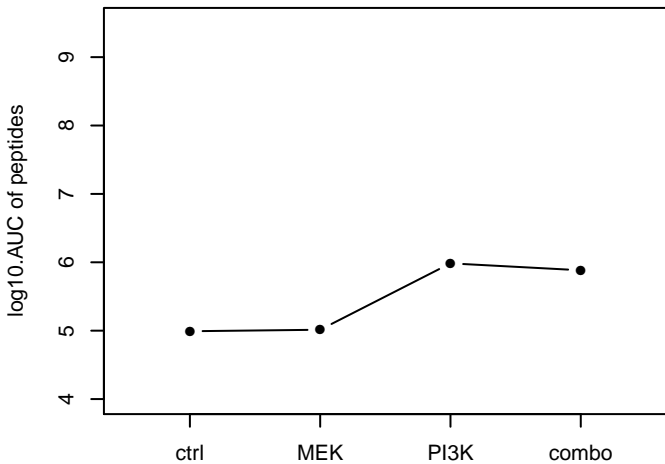**RBCC1\_HUMAN**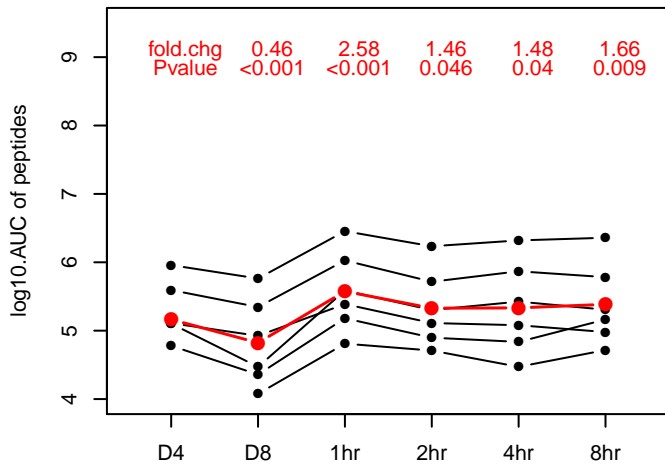**RBM10\_HUMAN**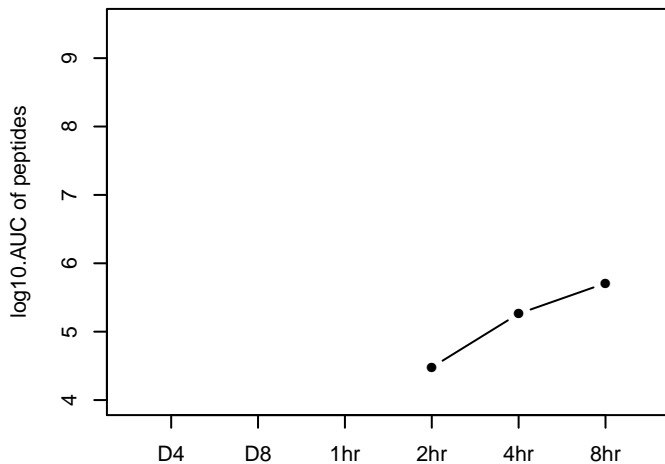**RBM14\_HUMAN**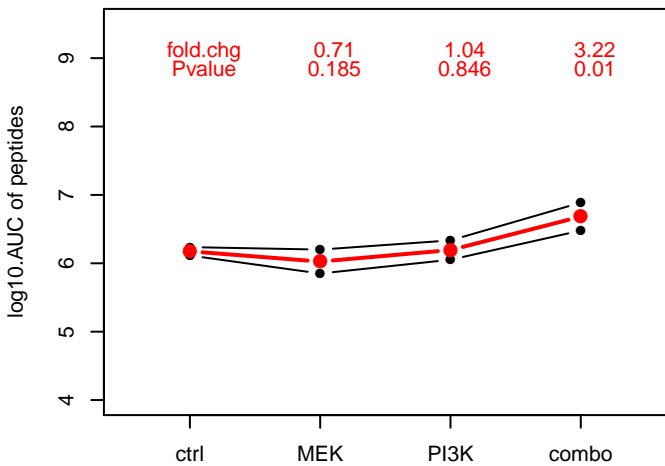**RBM14\_HUMAN**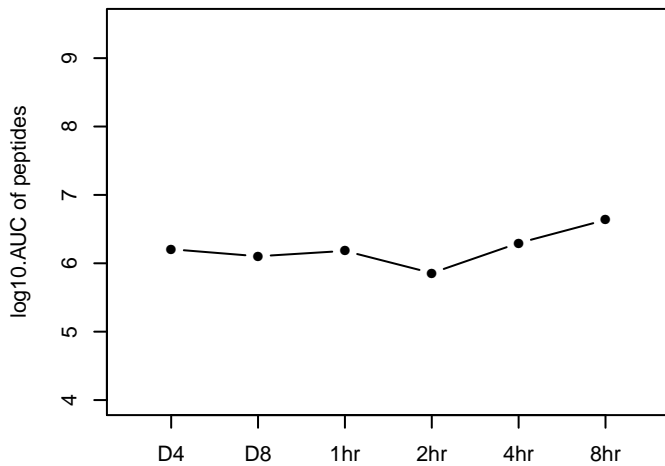

**RBM15\_HUMAN**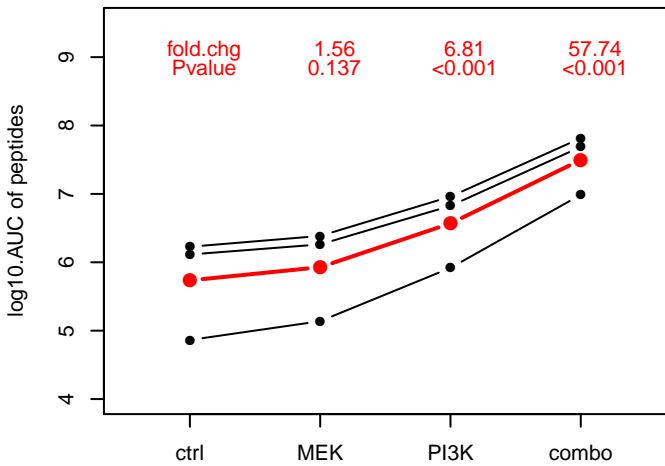**RBM15\_HUMAN**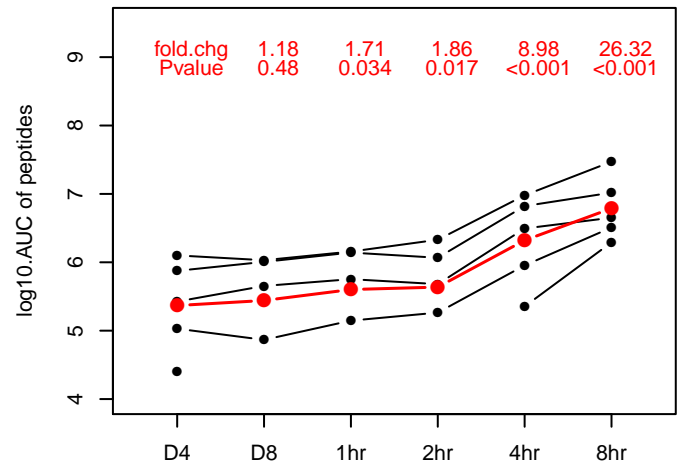**RBM4\_HUMAN**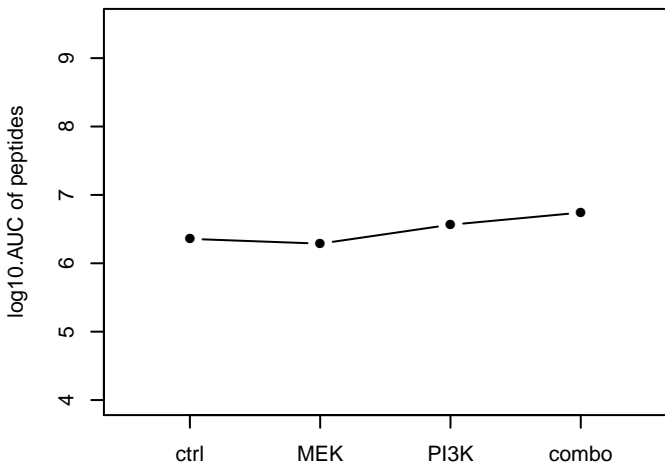**RBM4\_HUMAN**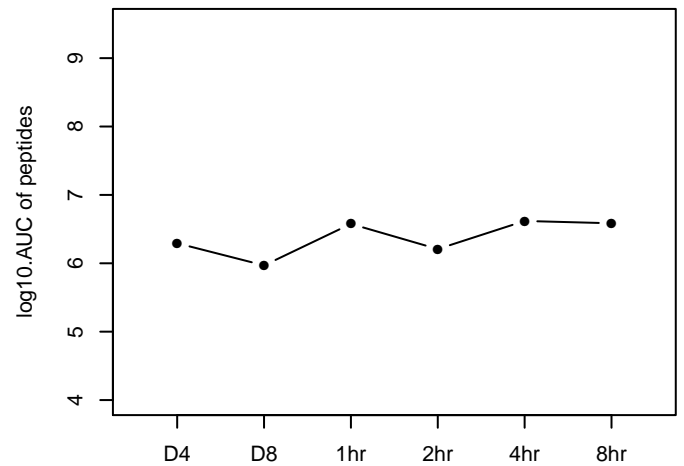**RBP2\_HUMAN**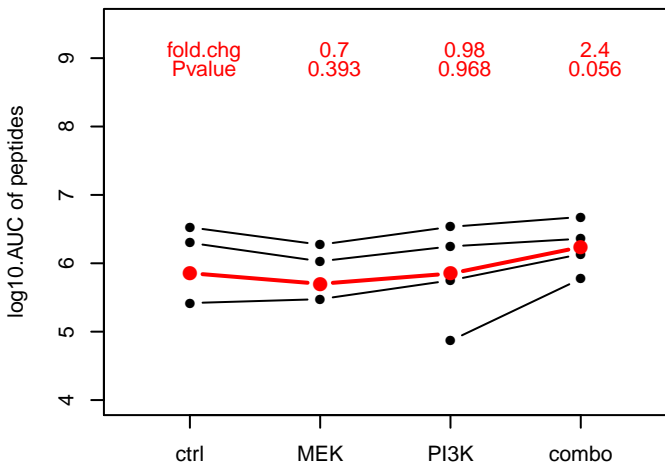**RBP2\_HUMAN**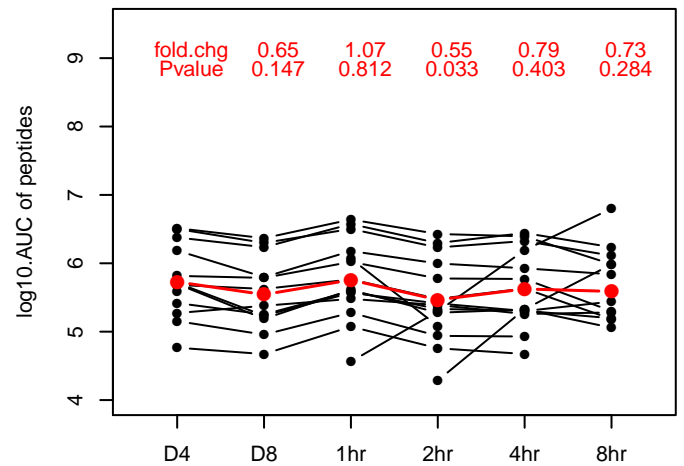

### RBP56\_HUMAN

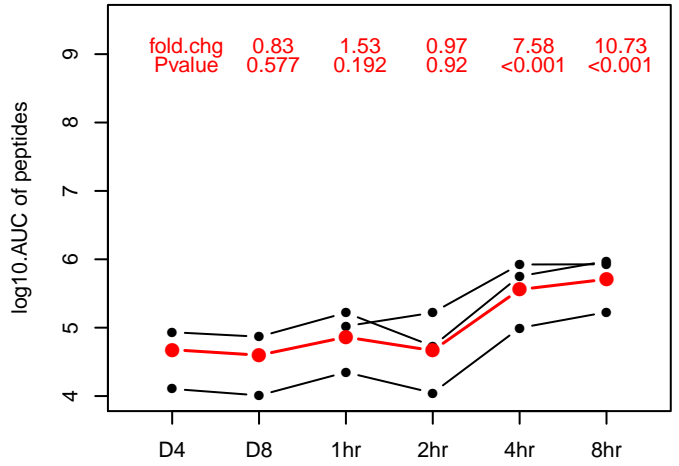

### RCN1\_HUMAN

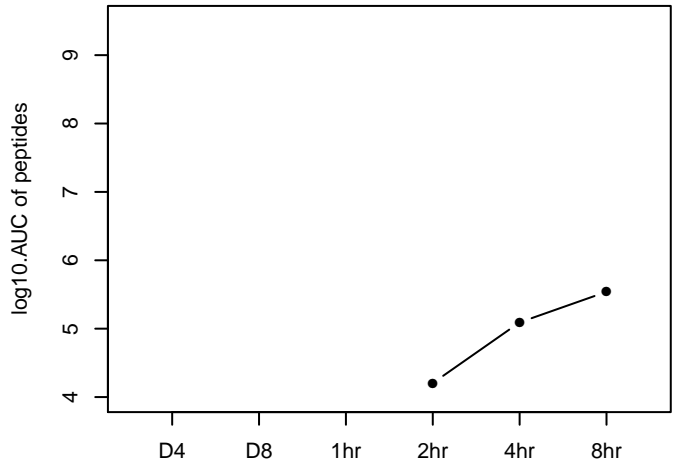

### RD23B\_HUMAN

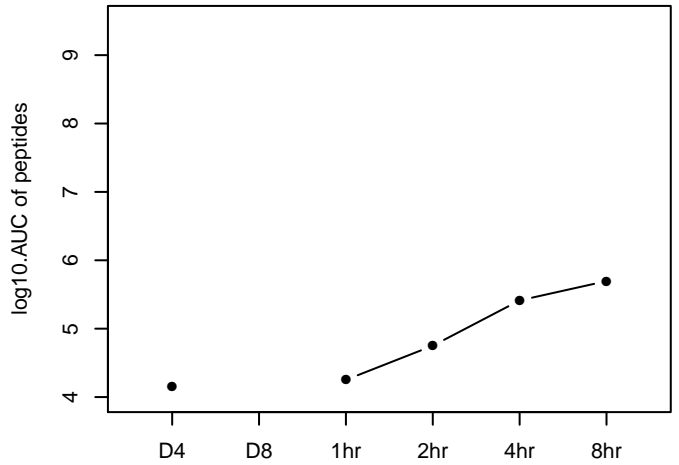

### RECQ1\_HUMAN

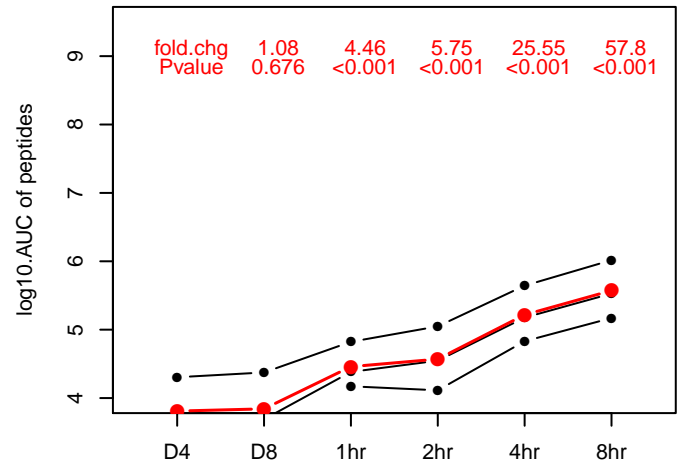

### RED\_HUMAN

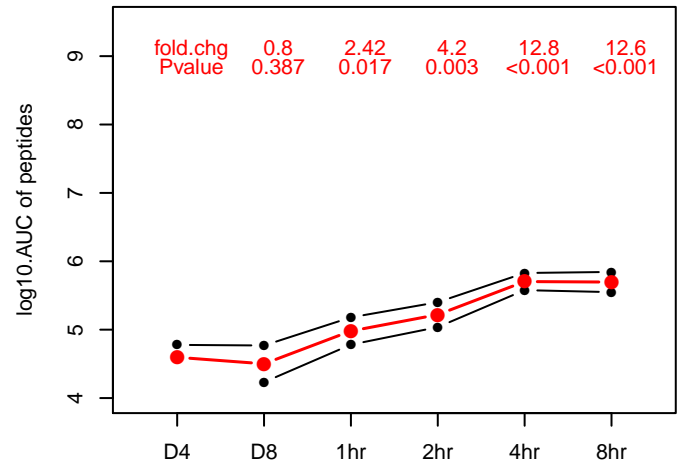

### RED1\_HUMAN

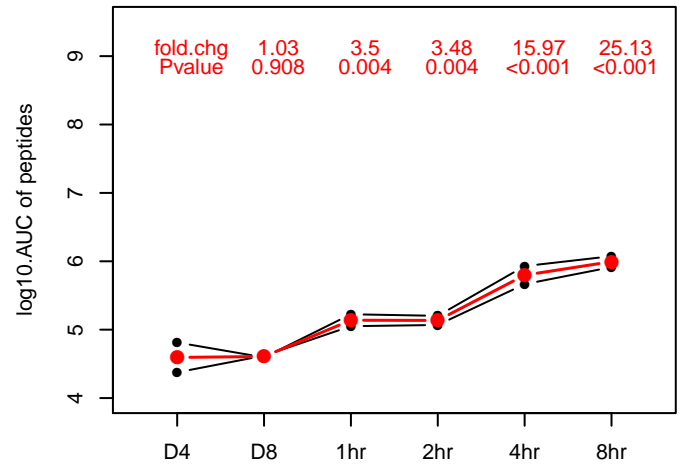

### RENT1\_HUMAN

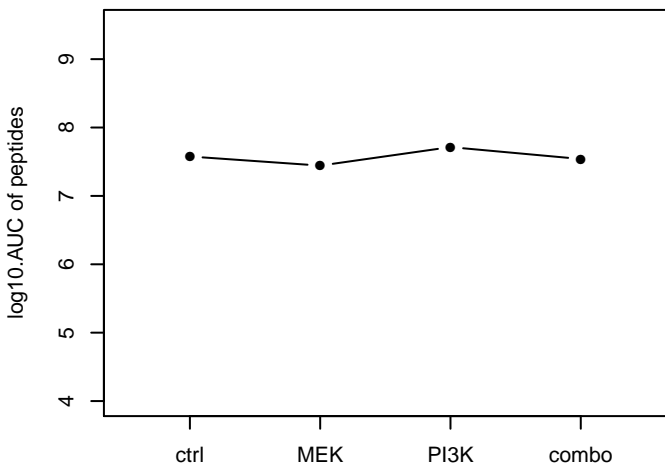

### RENT1\_HUMAN

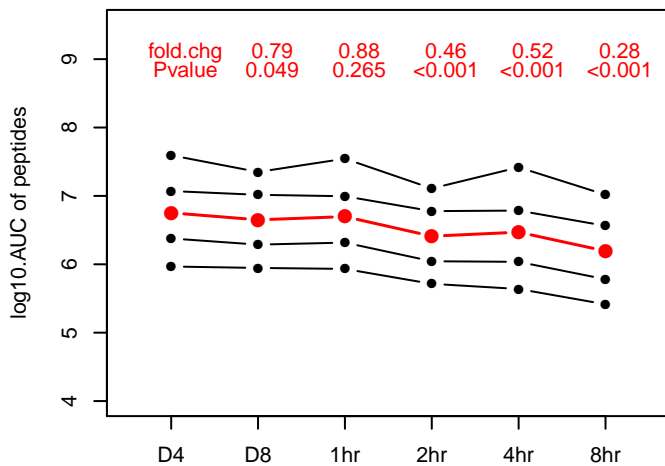

### REPI1\_HUMAN

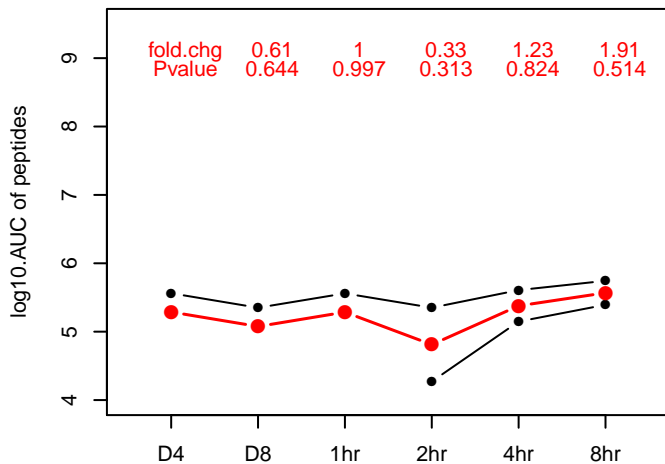

### REQU\_HUMAN

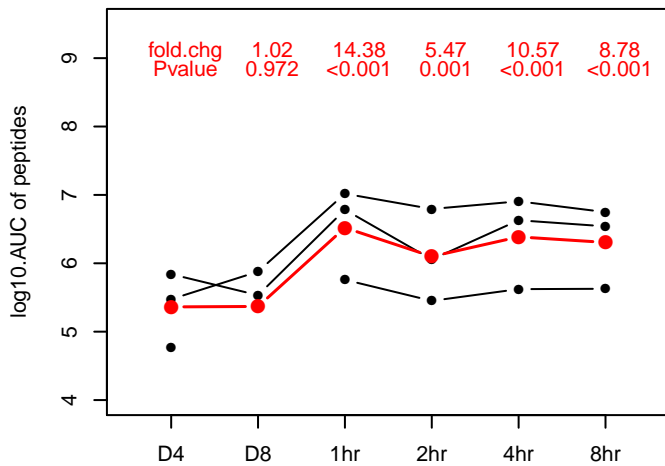

### RFA1\_HUMAN

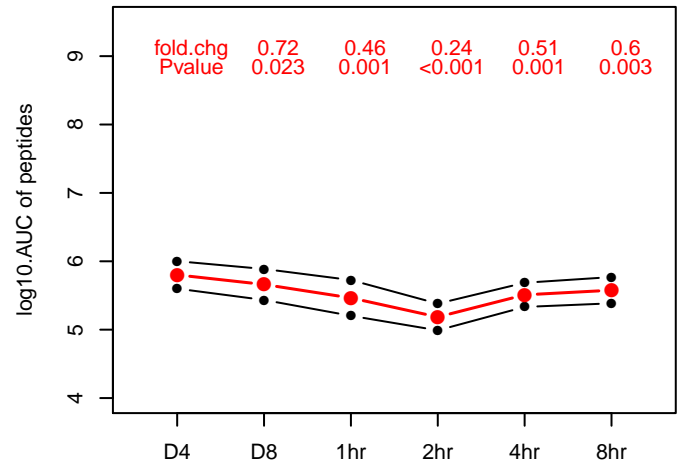

### RGAP1\_HUMAN

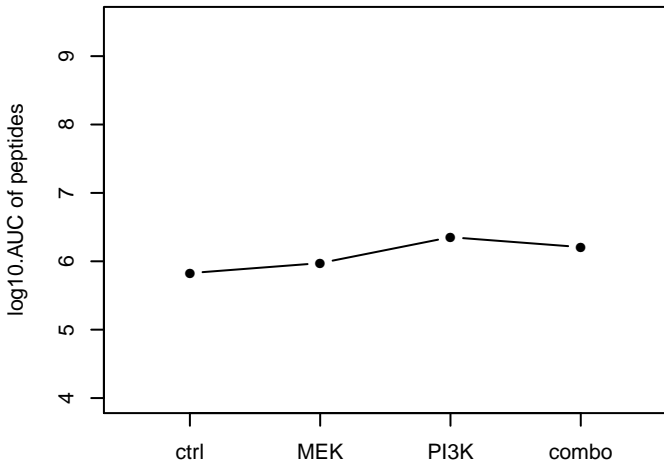

### RGAP1\_HUMAN

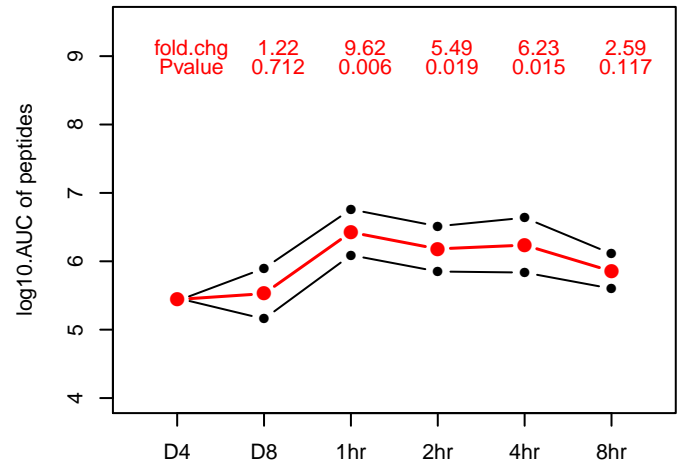

### RGPA1\_HUMAN

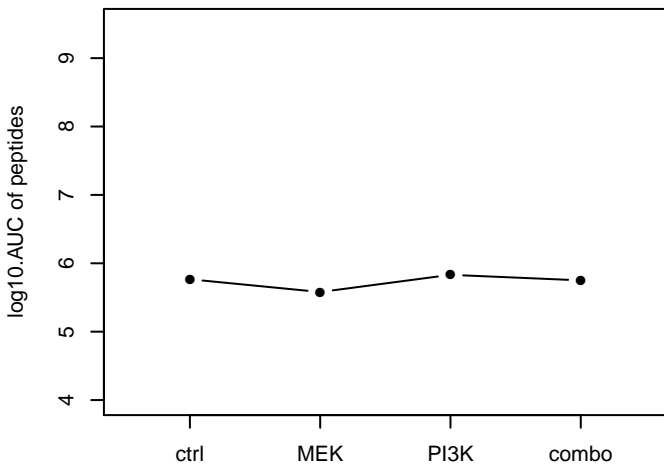

### RGPA1\_HUMAN

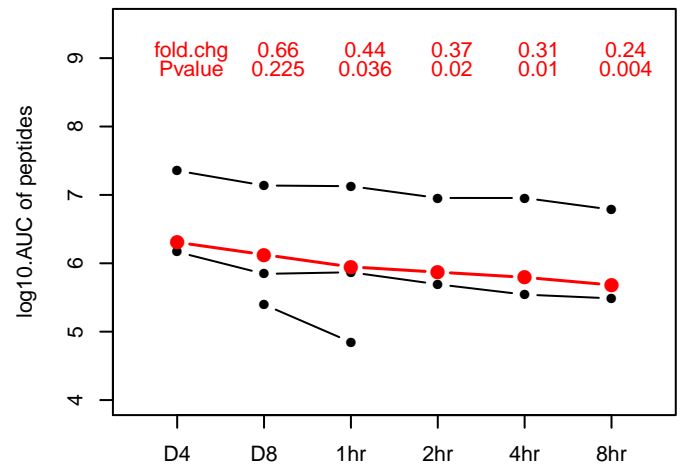



**RHG05\_HUMAN**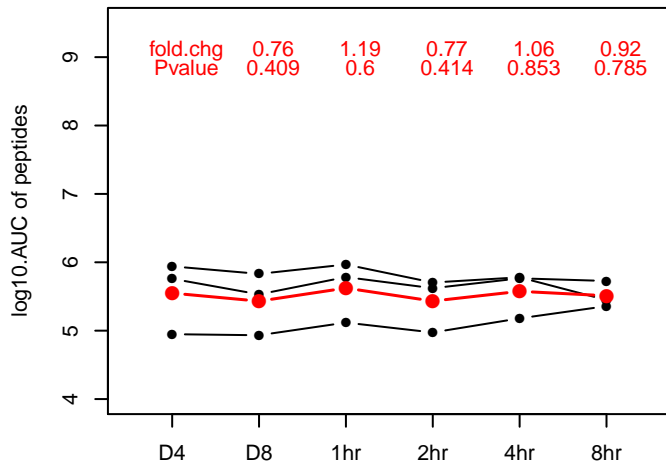**RHG22\_HUMAN**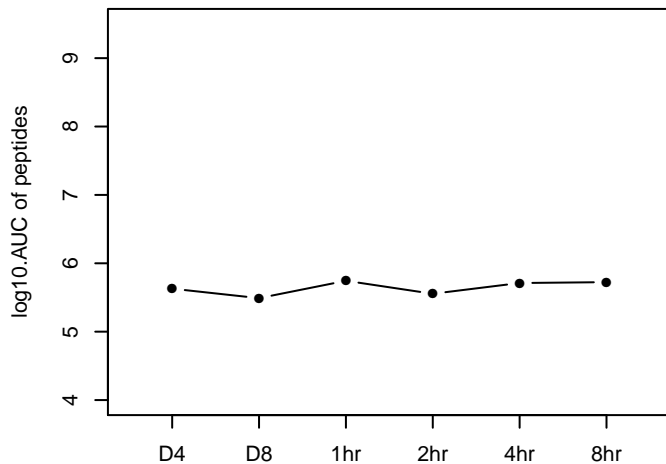**RIC8A\_HUMAN**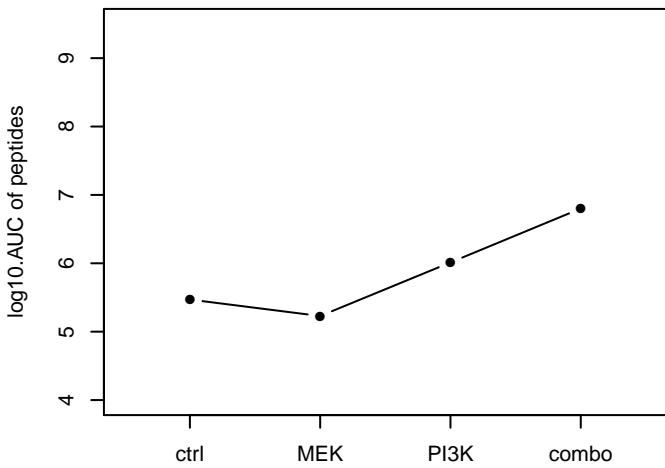**RIC8A\_HUMAN**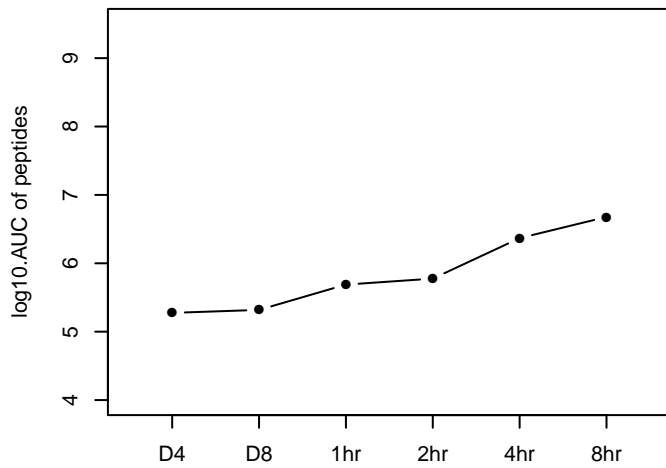

### RIF1\_HUMAN

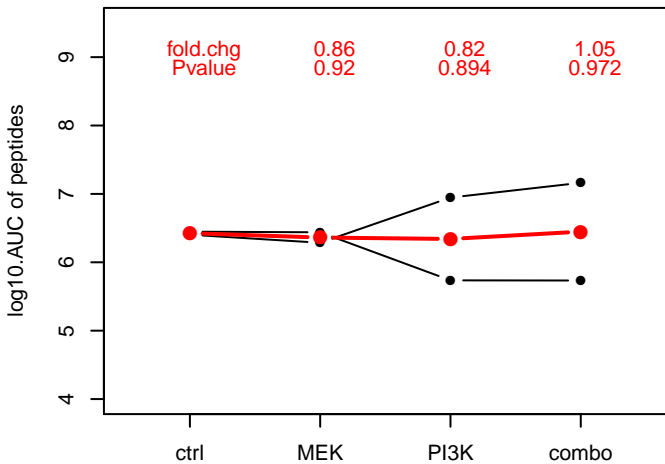

### RIF1\_HUMAN

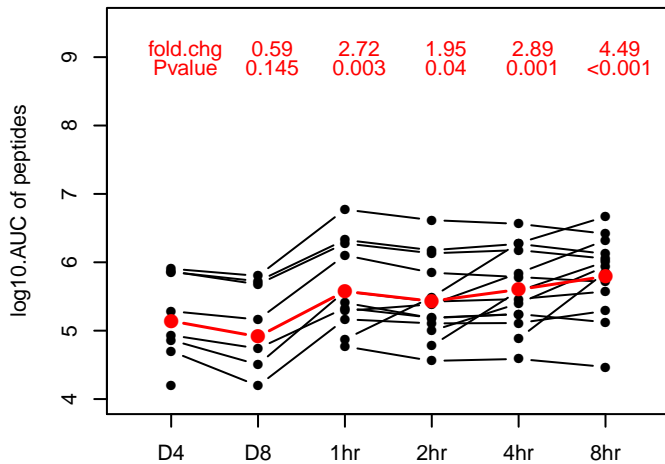

### RL18A\_HUMAN

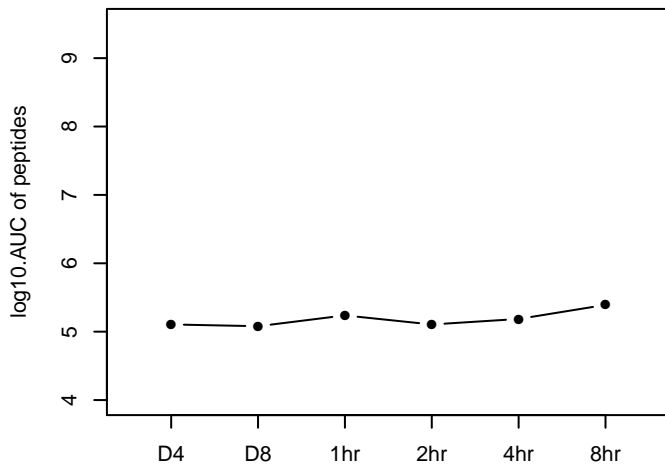

### RL21\_HUMAN

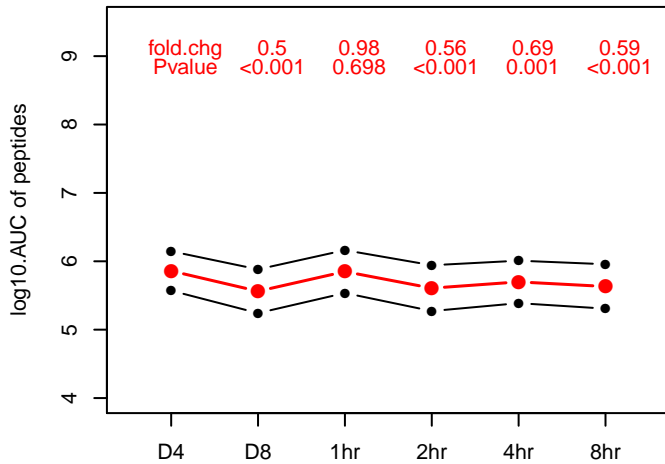

**RL29\_HUMAN**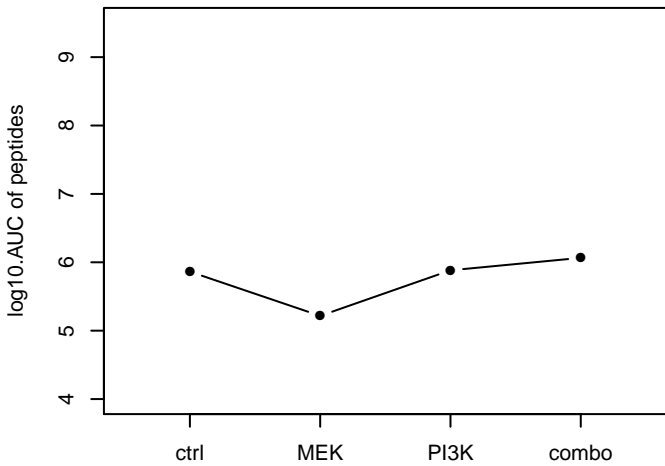**RL29\_HUMAN**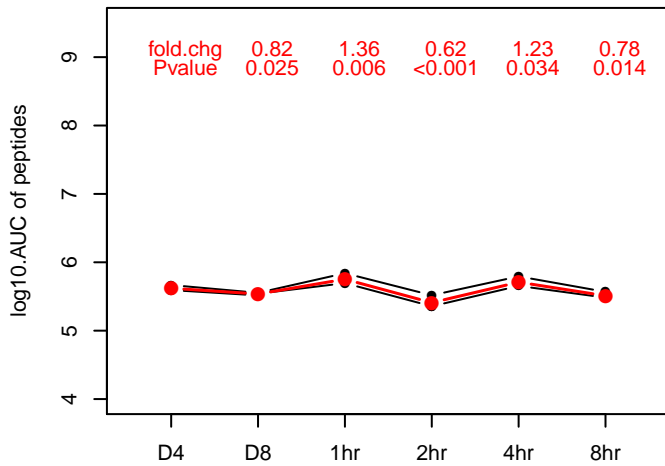**RL35\_HUMAN**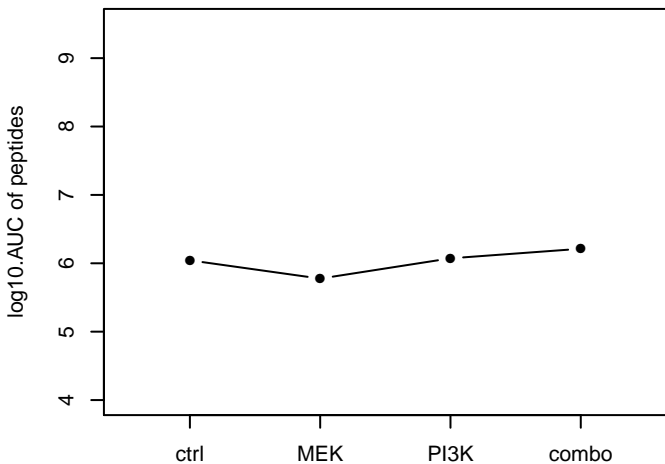**RL35\_HUMAN**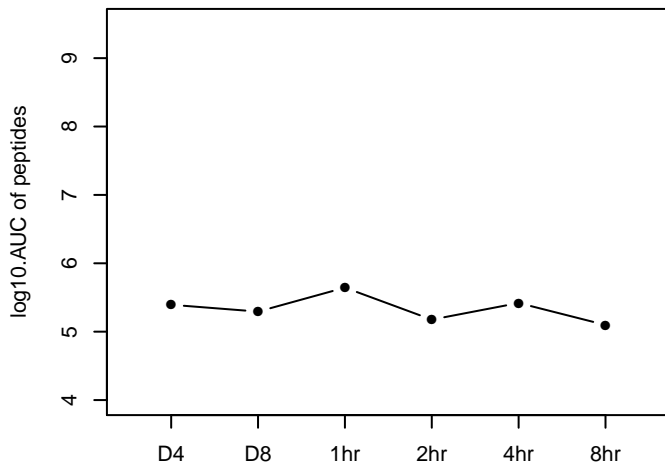**RLGPB\_HUMAN**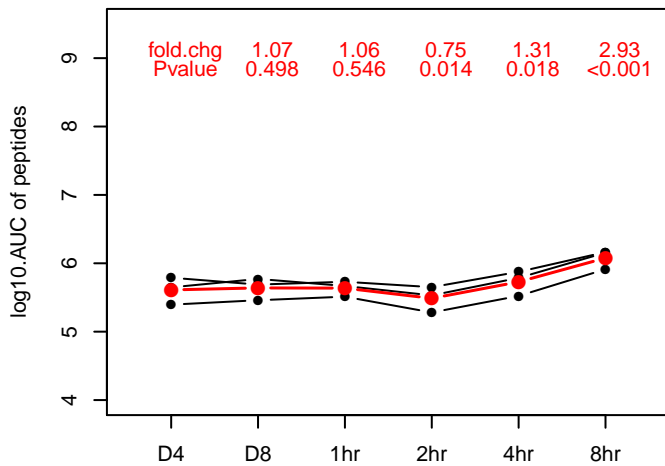

### RM13\_HUMAN

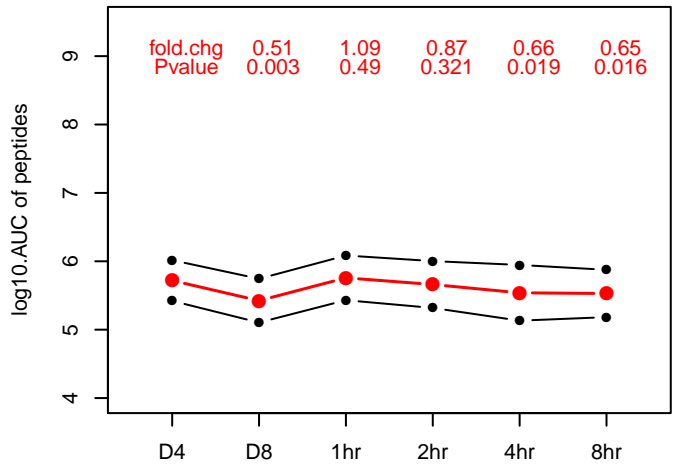

### RNF12\_HUMAN

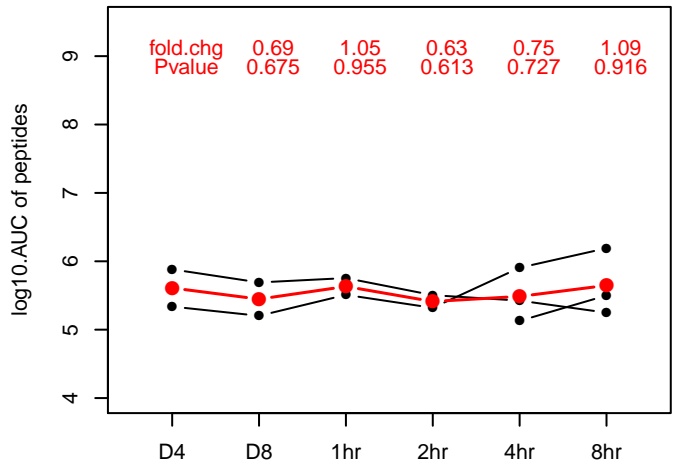

### RNF6\_HUMAN

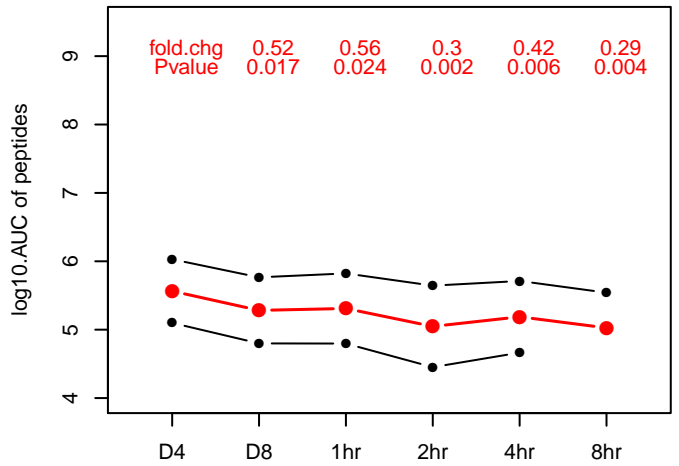

### ROCK2\_HUMAN

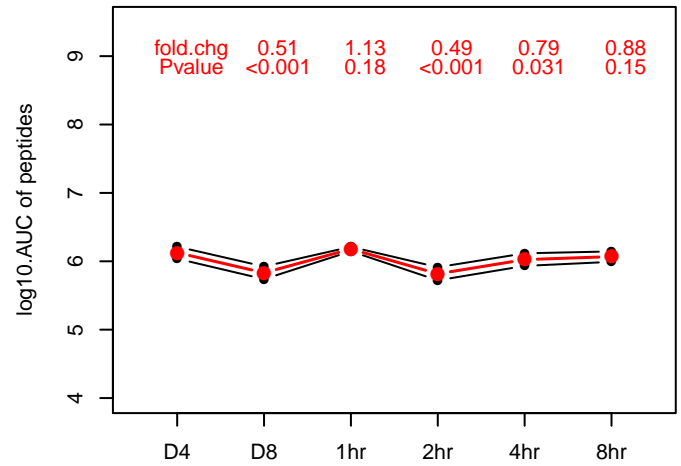

### RPA34\_HUMAN

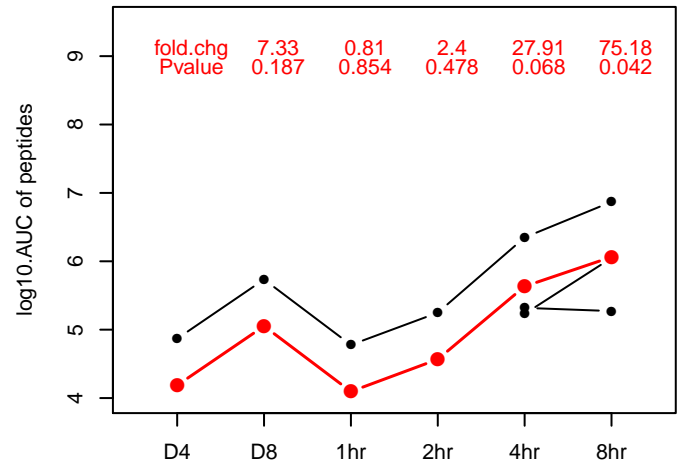

### RPGF6\_HUMAN

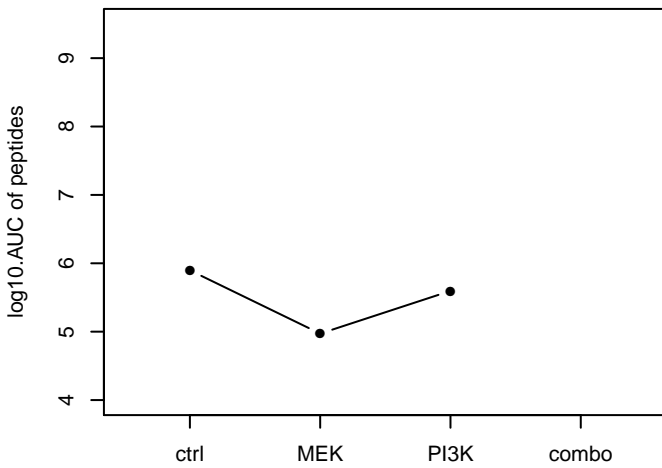

### RPGF6\_HUMAN

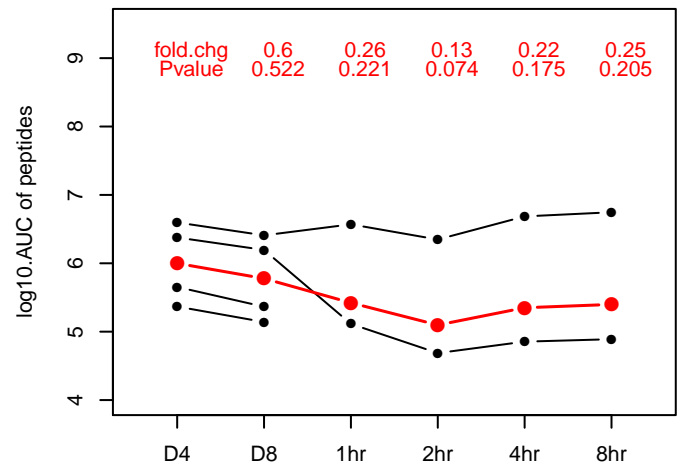

### RPP29\_HUMAN

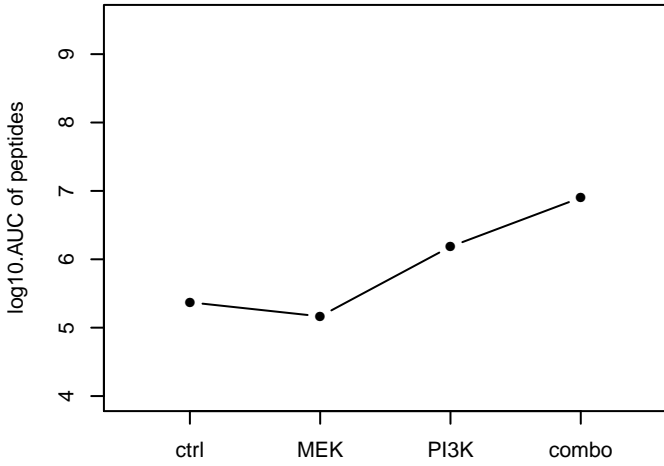

### RPP29\_HUMAN

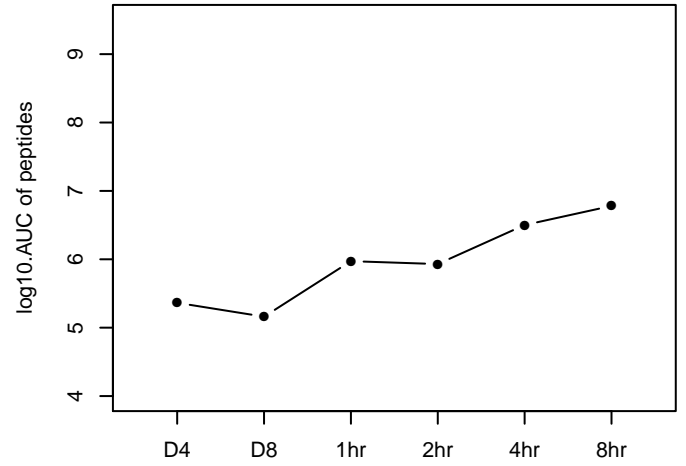

### RPRD2\_HUMAN

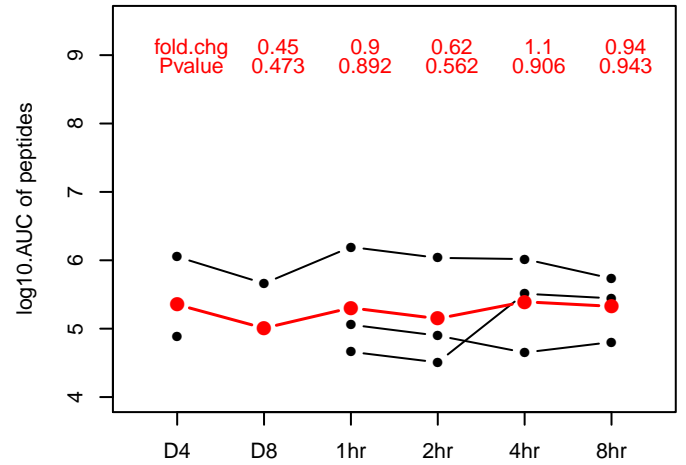

### RRBP1\_HUMAN

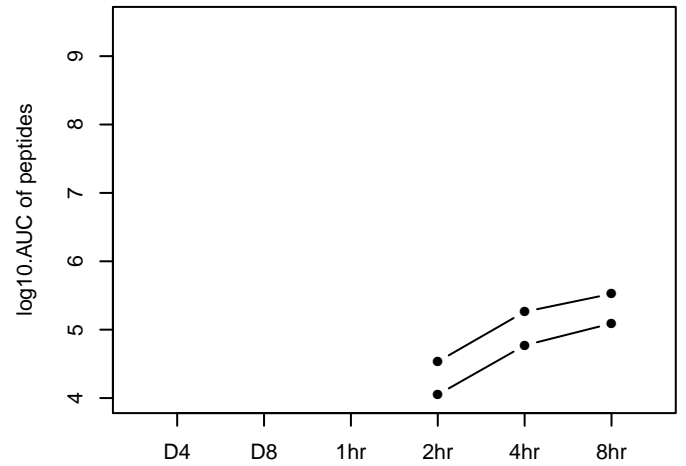

### RREB1\_HUMAN

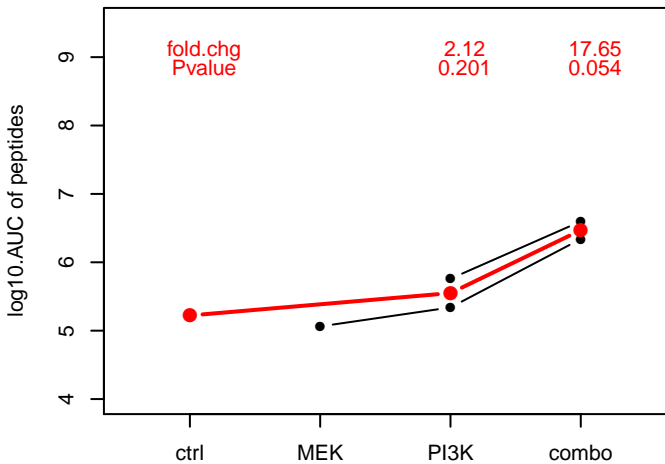

### RREB1\_HUMAN

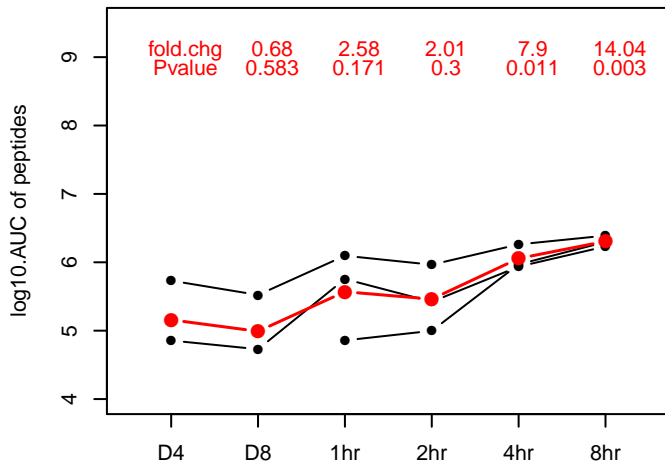

### RRMJ3\_HUMAN

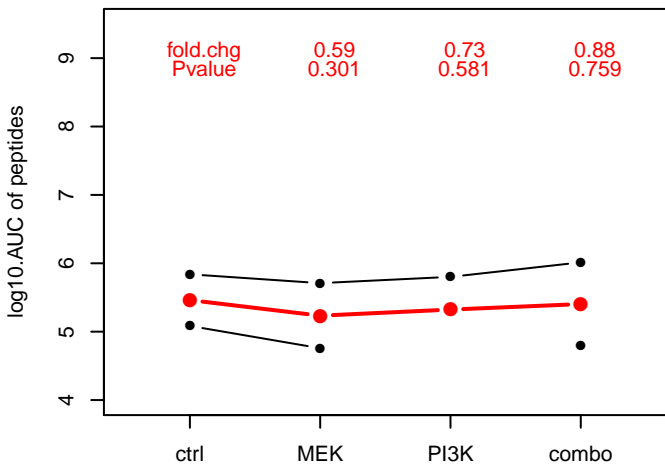

### RRMJ3\_HUMAN

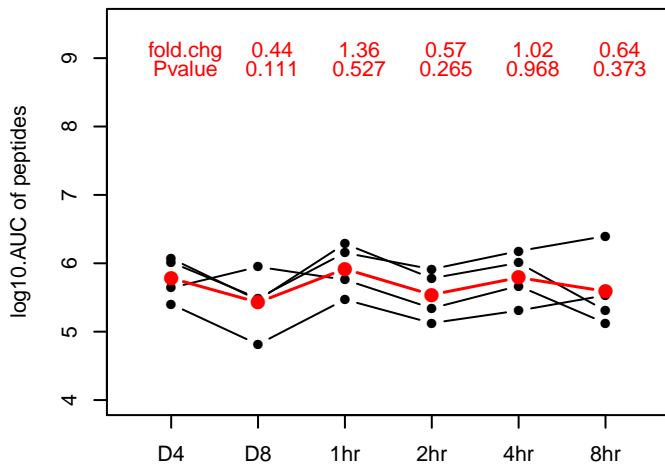

### RRP12\_HUMAN

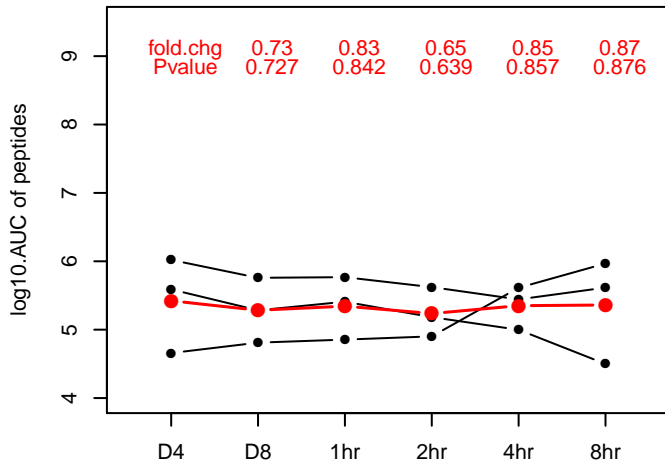

**RS2\_HUMAN**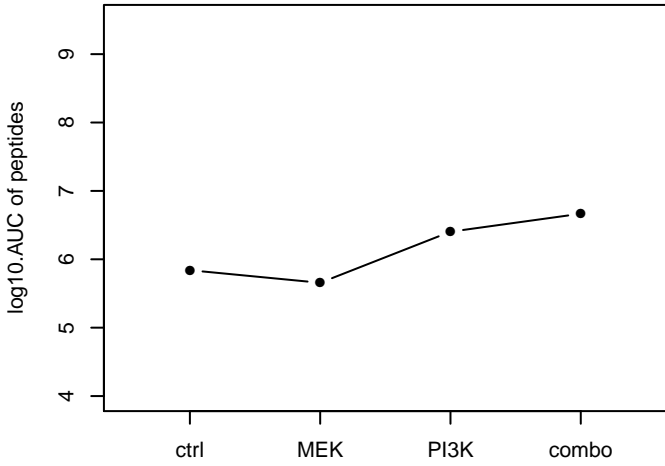**RS2\_HUMAN**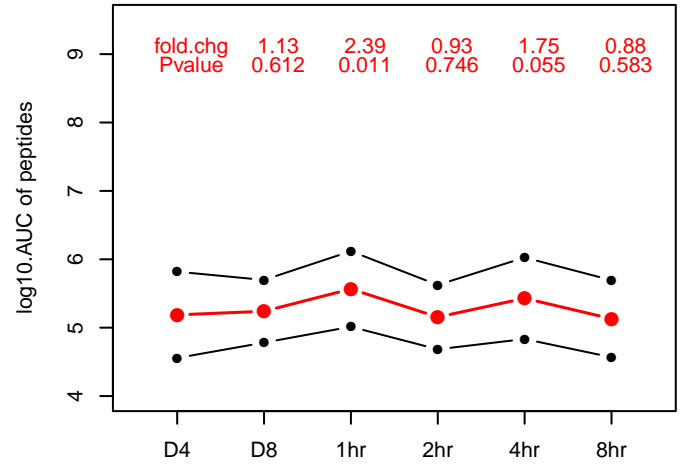**RS28\_HUMAN**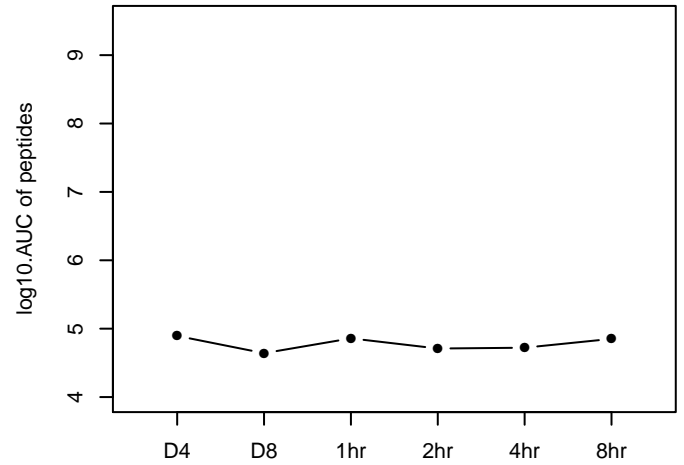**RS3\_HUMAN**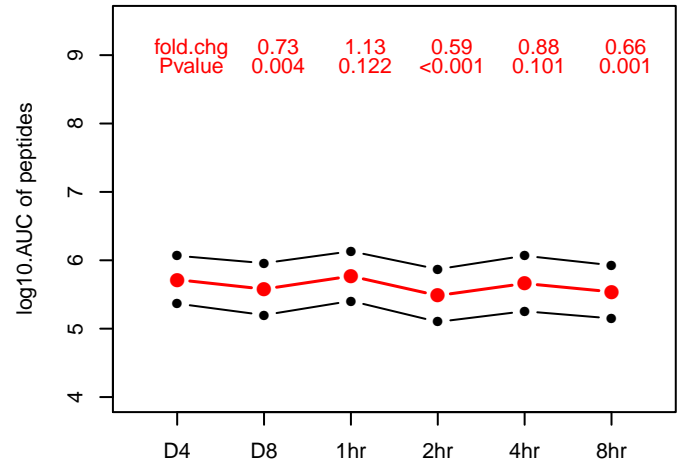



**RS3A\_HUMAN**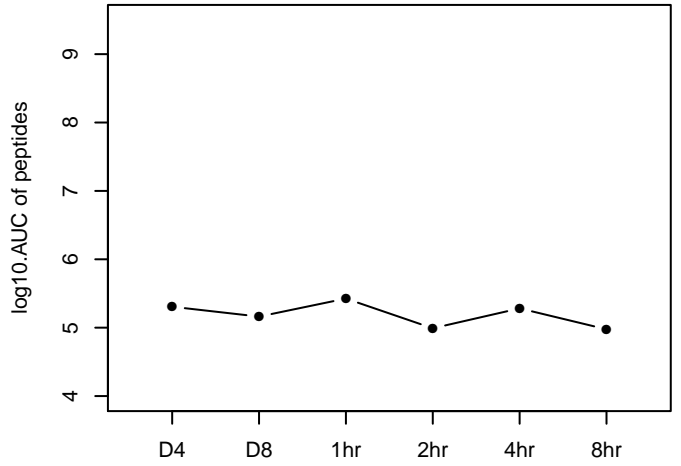**RS6\_HUMAN**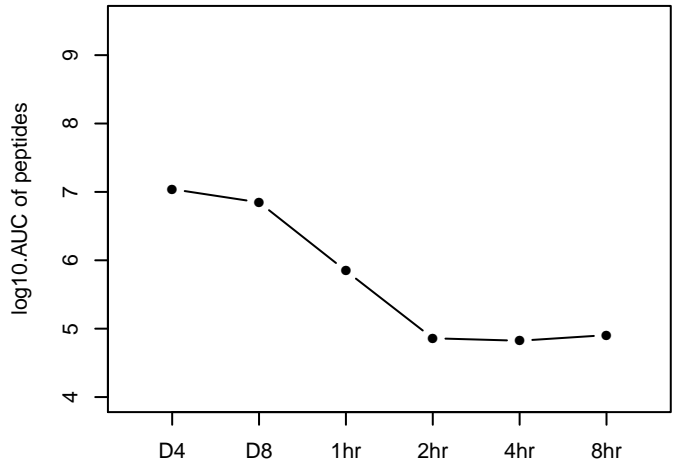**RSF1\_HUMAN**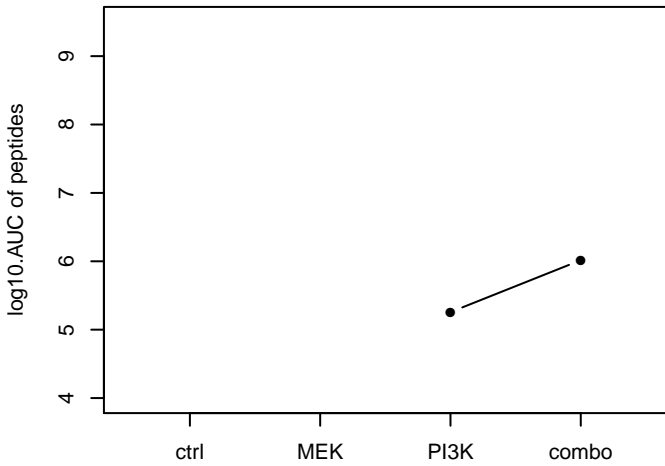**RSF1\_HUMAN**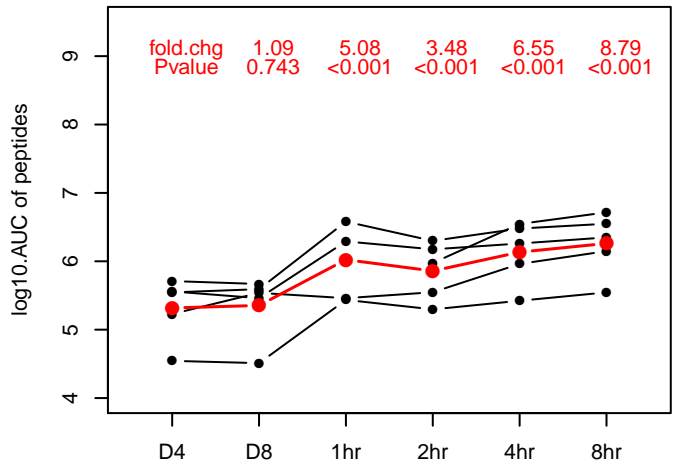

**RT29\_HUMAN**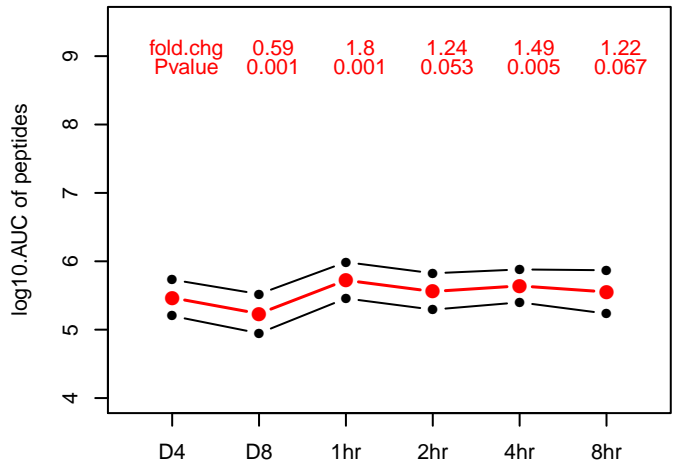**RT34\_HUMAN**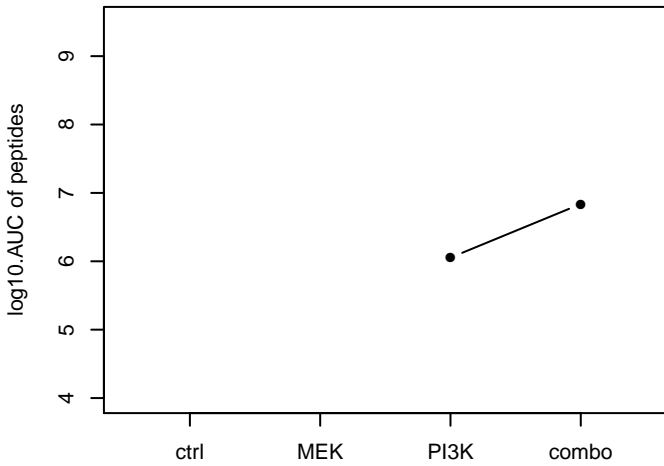**RT34\_HUMAN**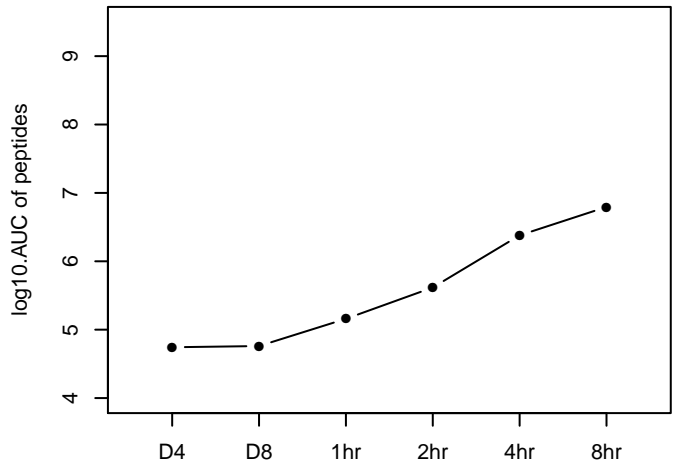**RTF1\_HUMAN**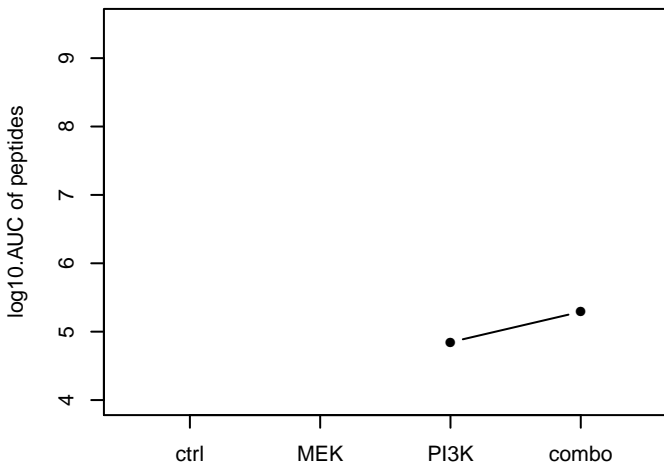**RTF1\_HUMAN**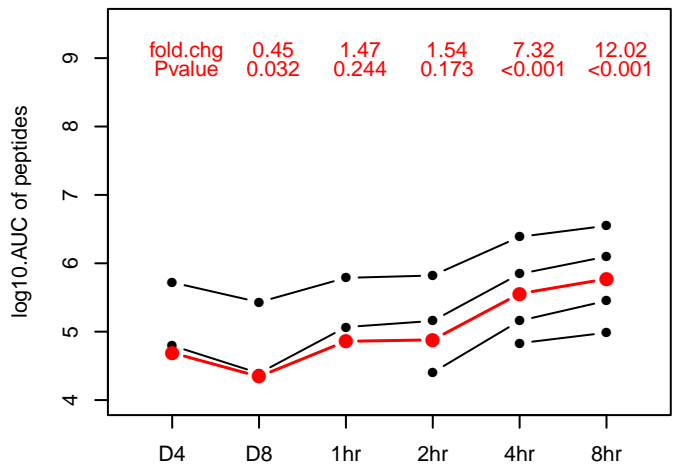

### RUBIC\_HUMAN

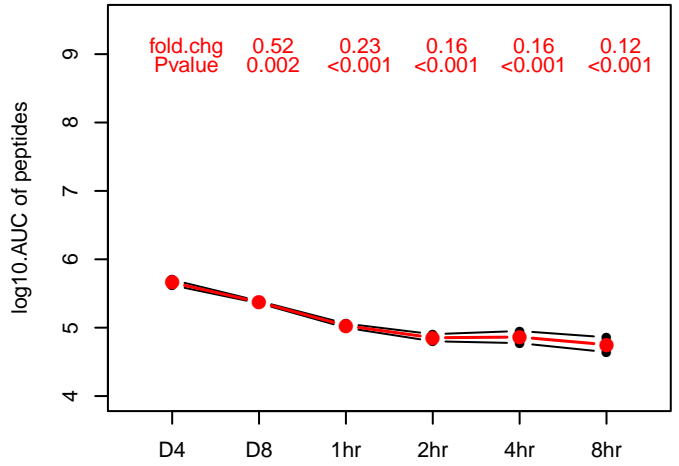

### RUND1\_HUMAN

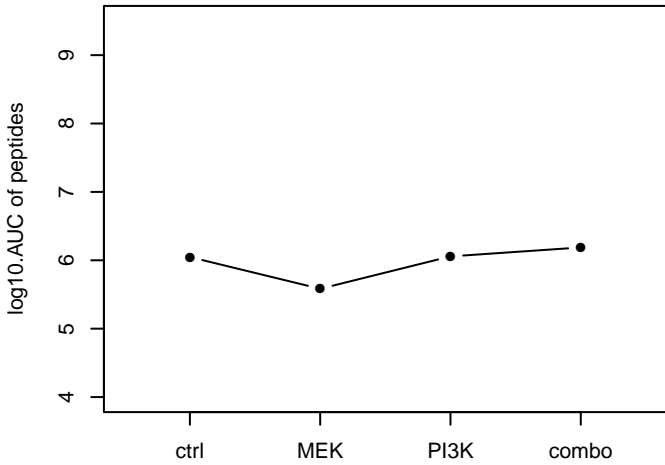

### RUND1\_HUMAN

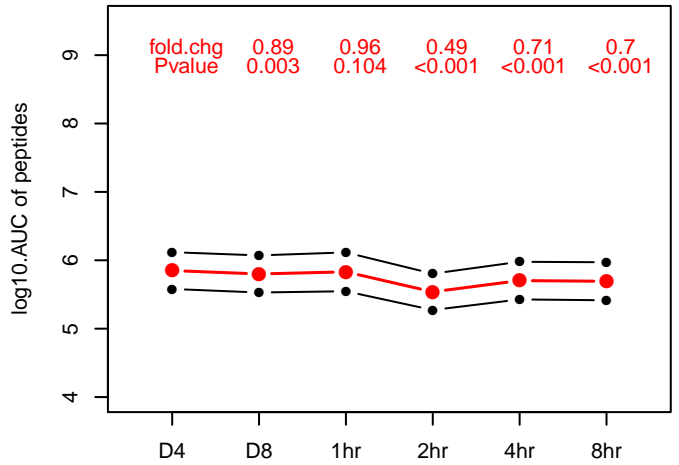

### RUVB2\_HUMAN

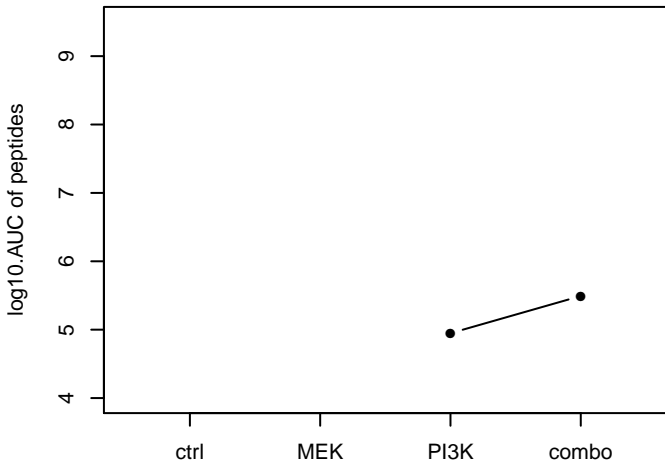

### RUVB2\_HUMAN

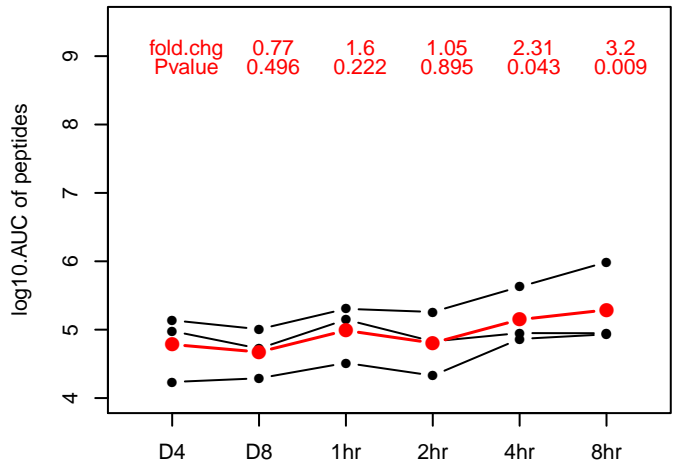

### S12A2\_HUMAN

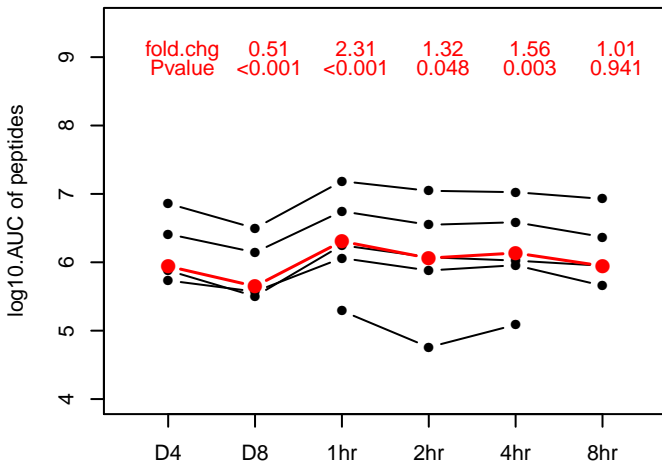

### S19A2\_HUMAN

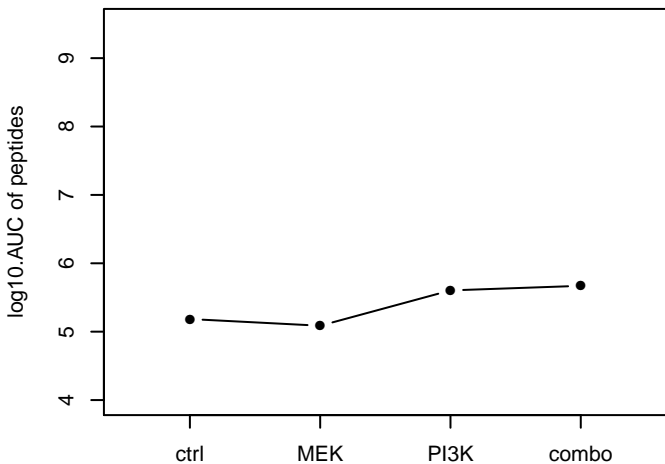

### S19A2\_HUMAN

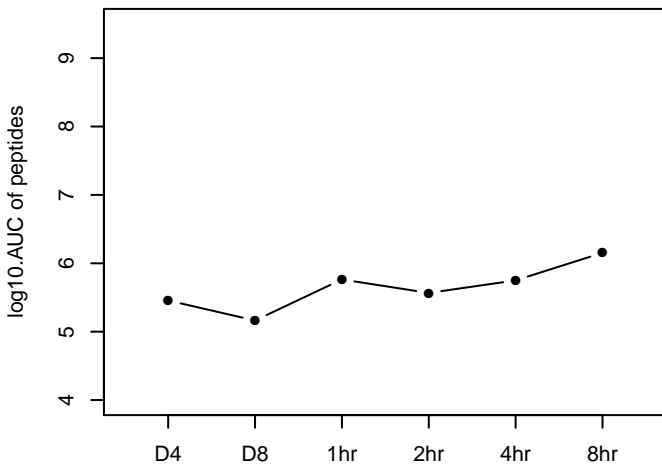

### SAAL1\_HUMAN

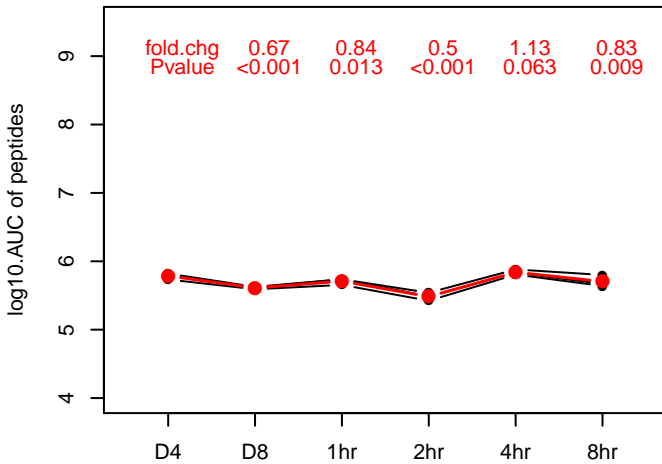

**SAC2\_HUMAN**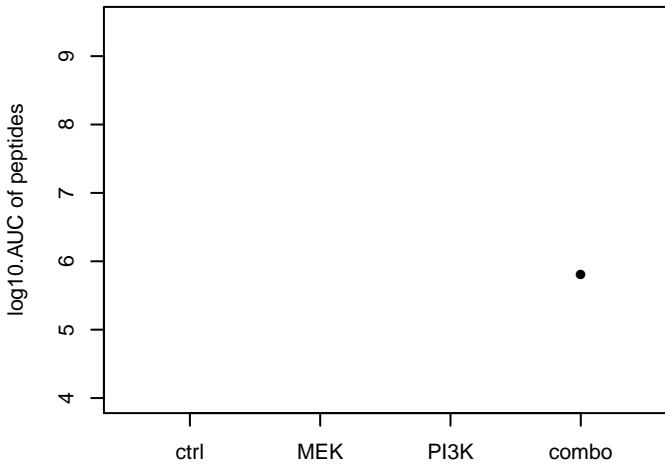**SAC2\_HUMAN**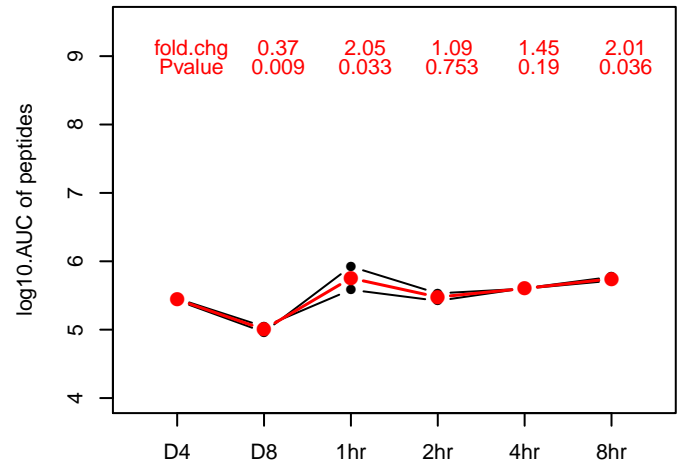**SAE1\_HUMAN**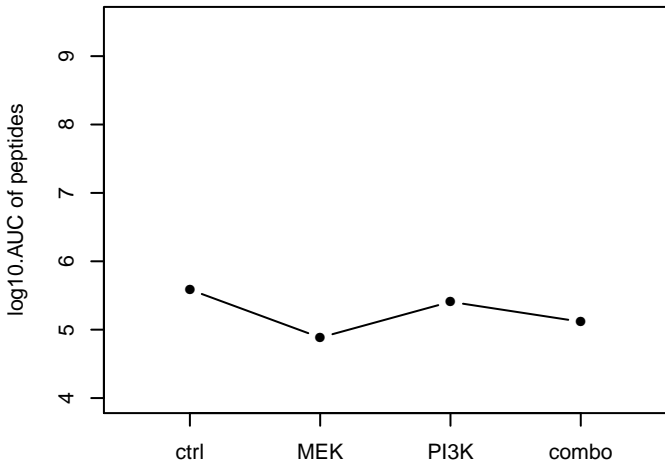**SAE2\_HUMAN**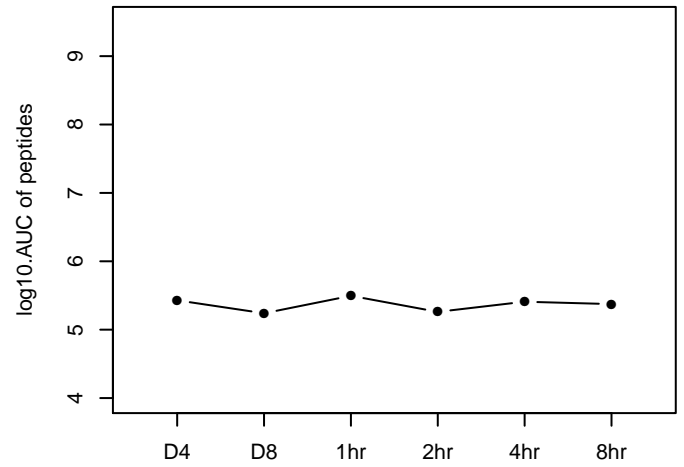

### SAP18\_HUMAN

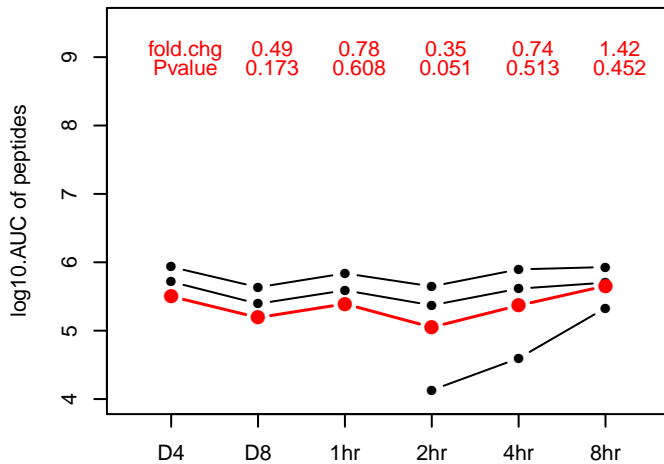

### SART3\_HUMAN

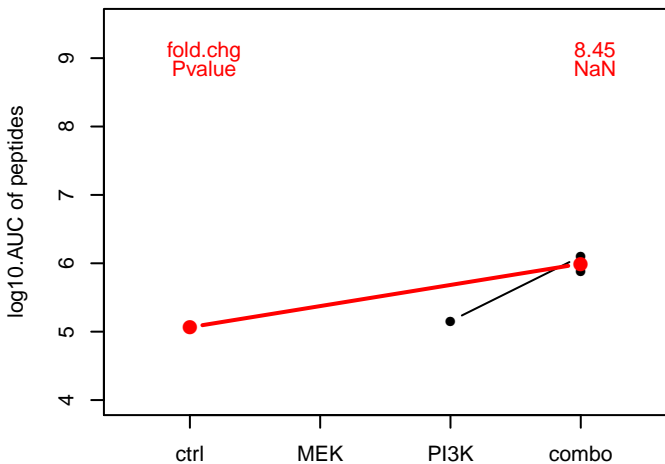

### SART3\_HUMAN

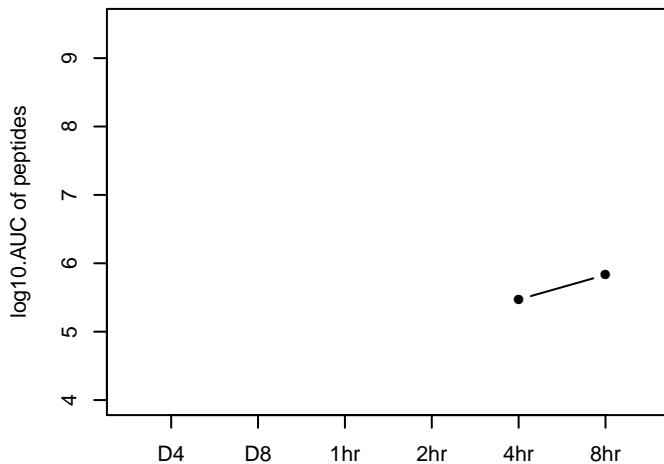

### SASH1\_HUMAN

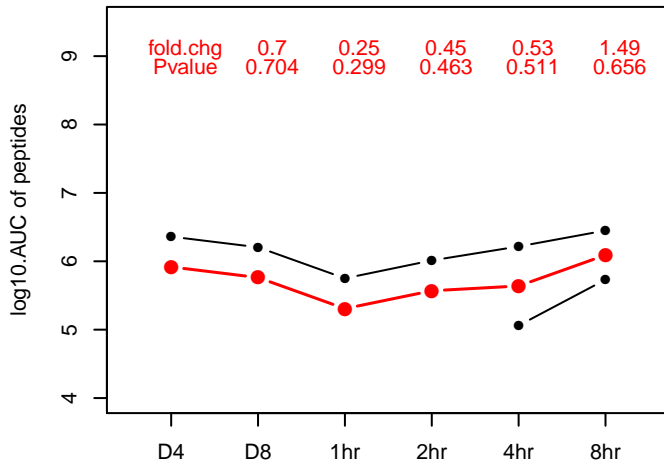

**SATB1\_HUMAN**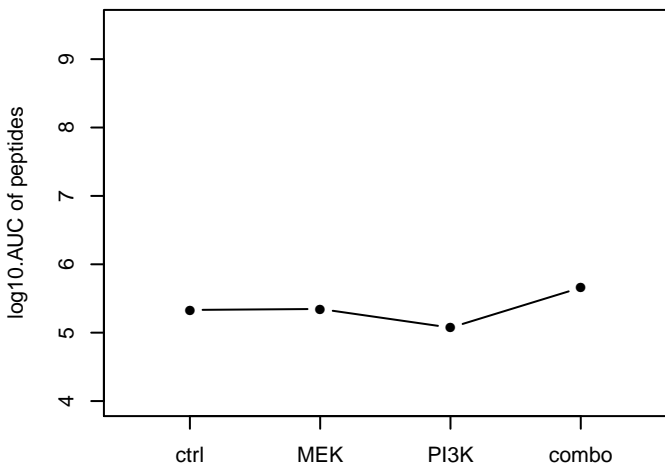**SC16A\_HUMAN**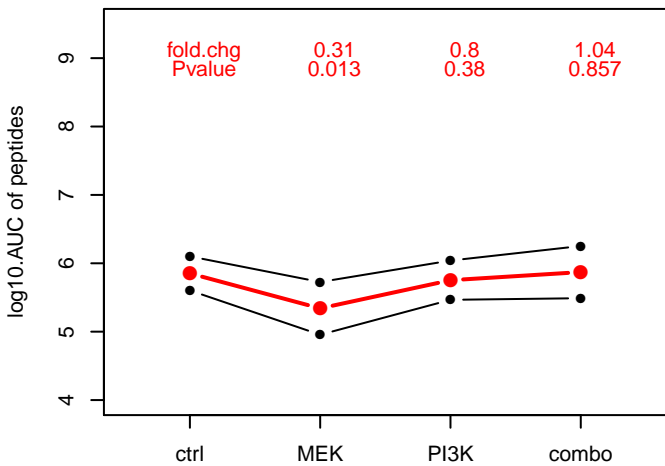**SC16A\_HUMAN**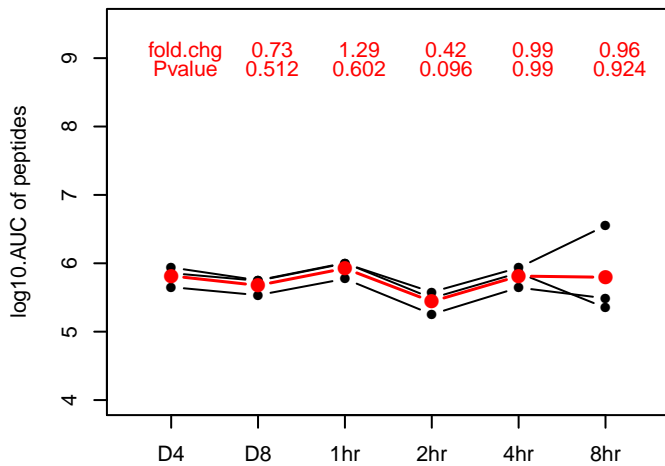**SCAF8\_HUMAN**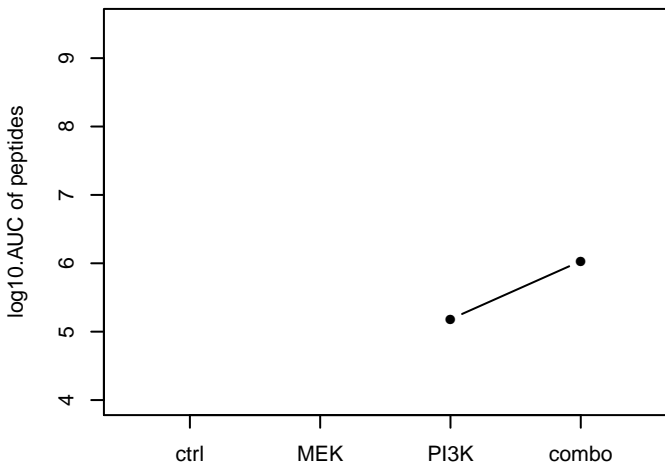**SCAF8\_HUMAN**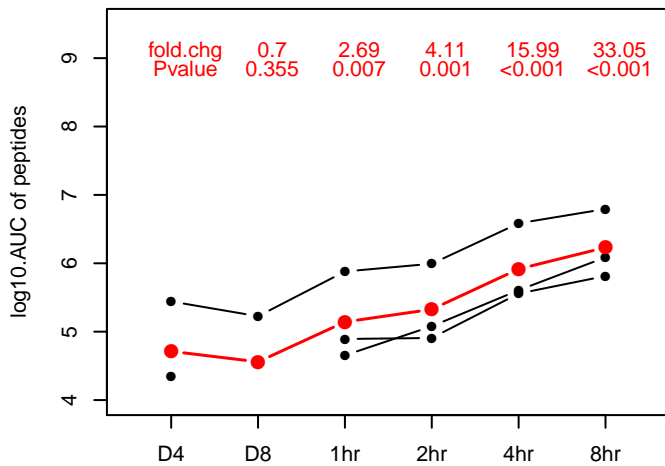

**SCAM1\_HUMAN**

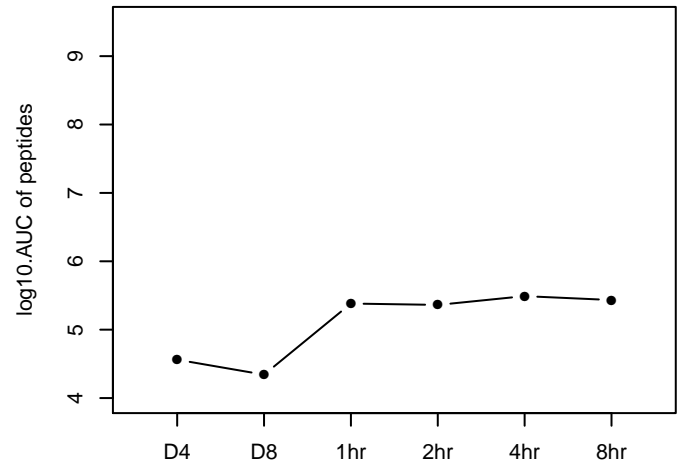

**SCFD1\_HUMAN**

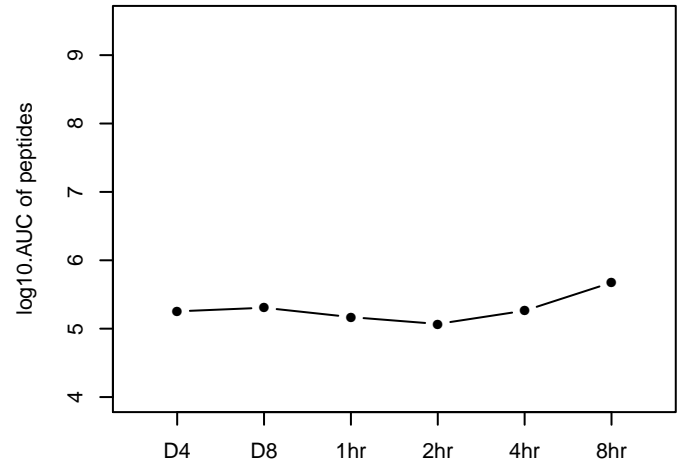

**SCRN1\_HUMAN**

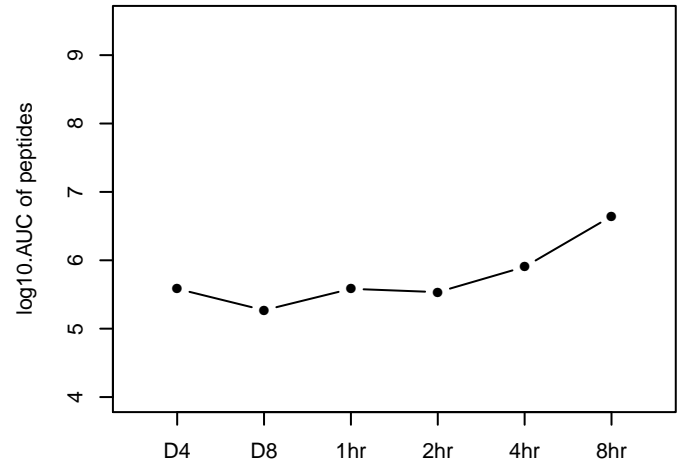



**SDA1\_HUMAN**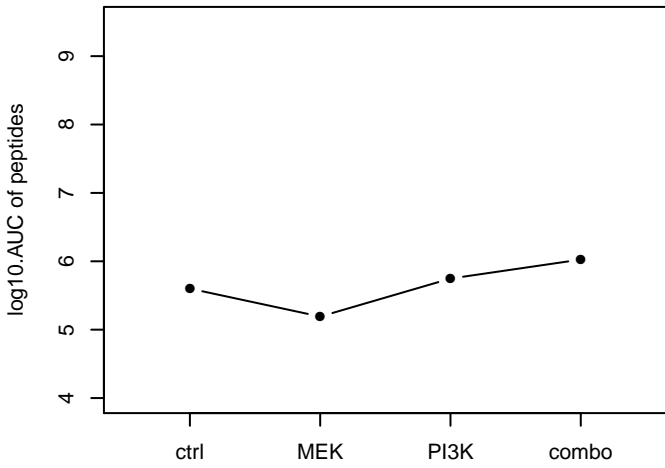**SDA1\_HUMAN**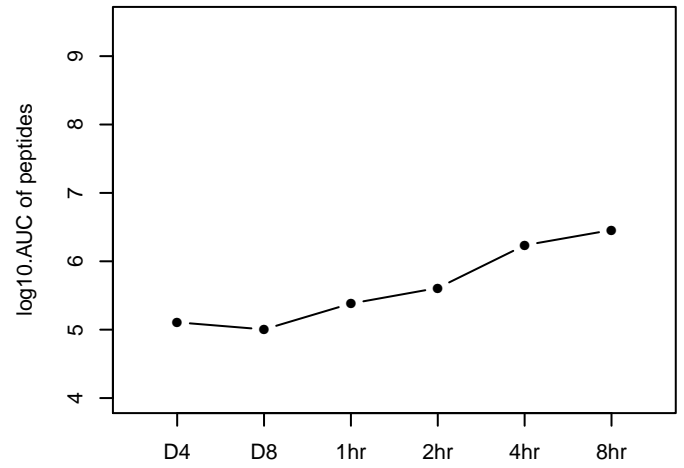**SDCB1\_HUMAN**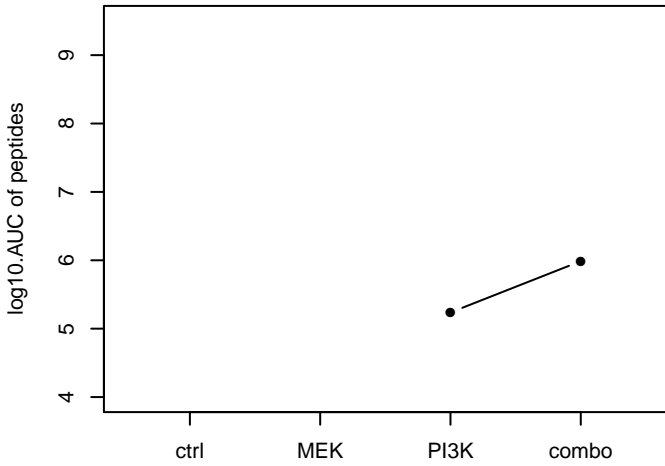**SDCB1\_HUMAN**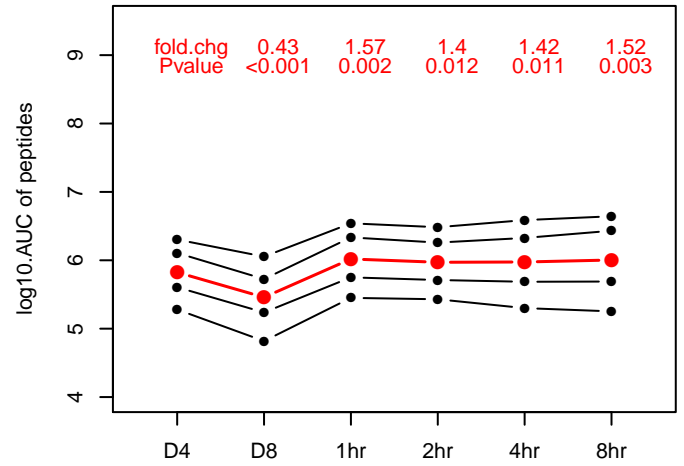**SENP3\_HUMAN**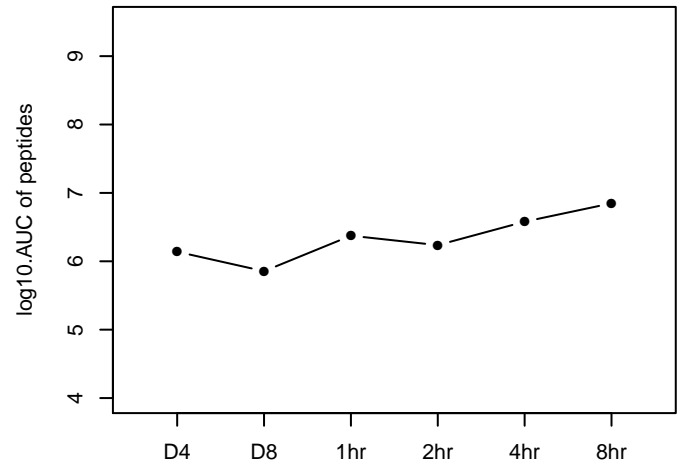

**SEN6\_HUMAN**

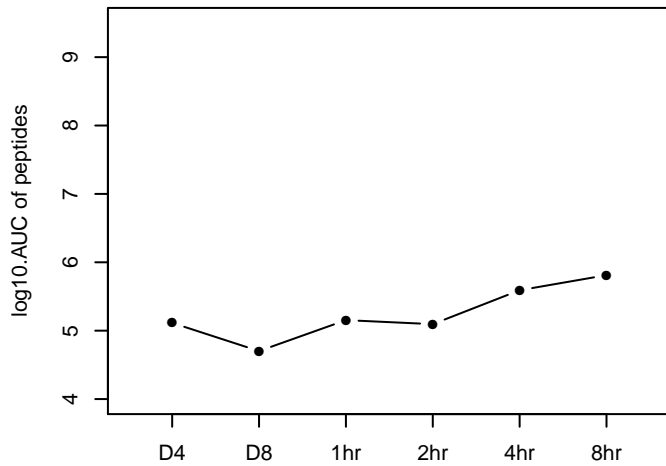

**SEP10\_HUMAN**

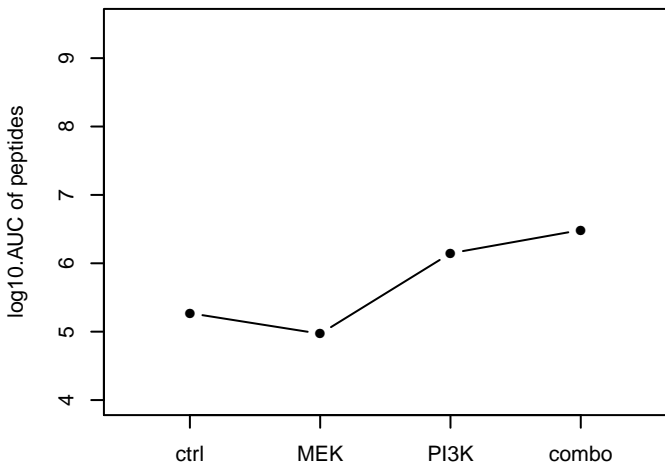

**SEPT2\_HUMAN**

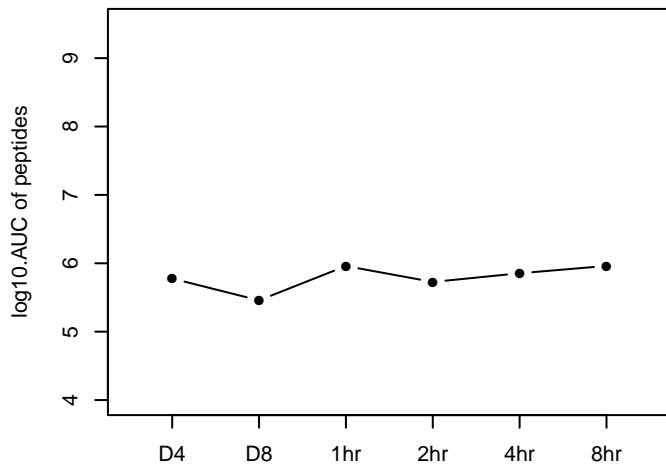

**SEPT6\_HUMAN**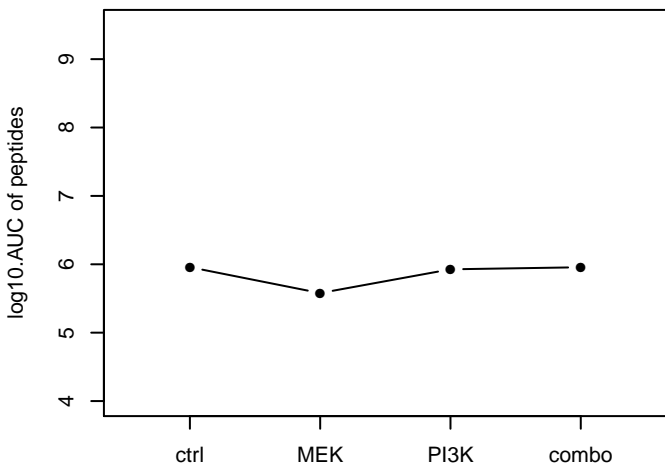**SEPT6\_HUMAN**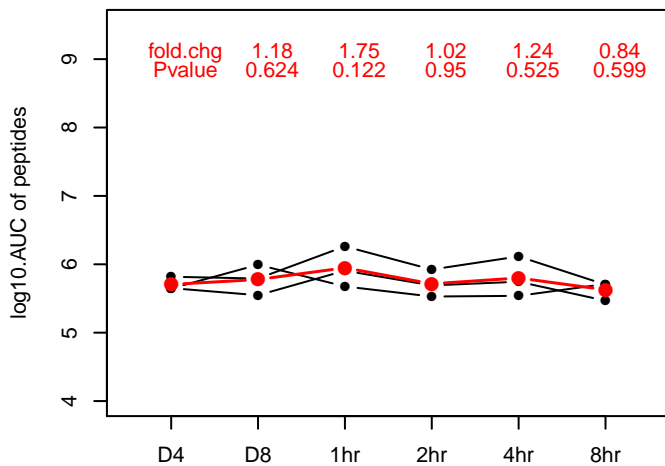**SEPT9\_HUMAN**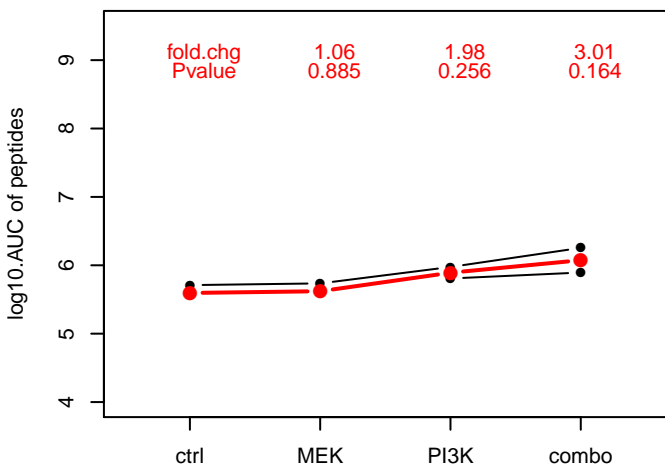**SEPT9\_HUMAN**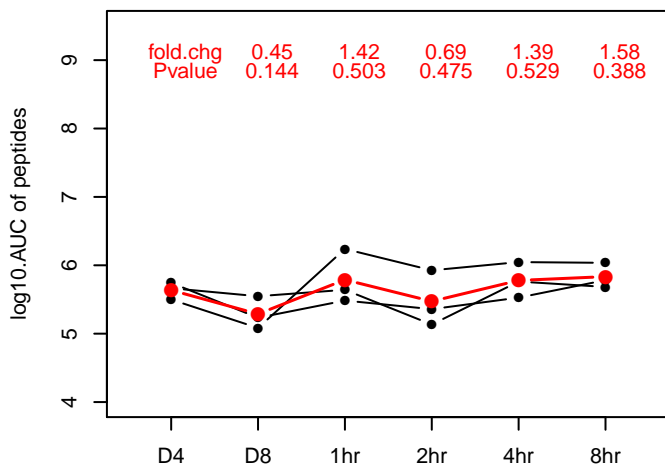**SERA\_HUMAN**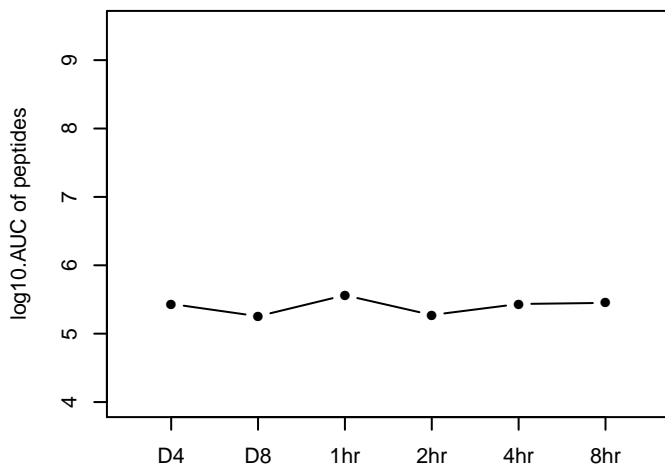

### SF3A1\_HUMAN

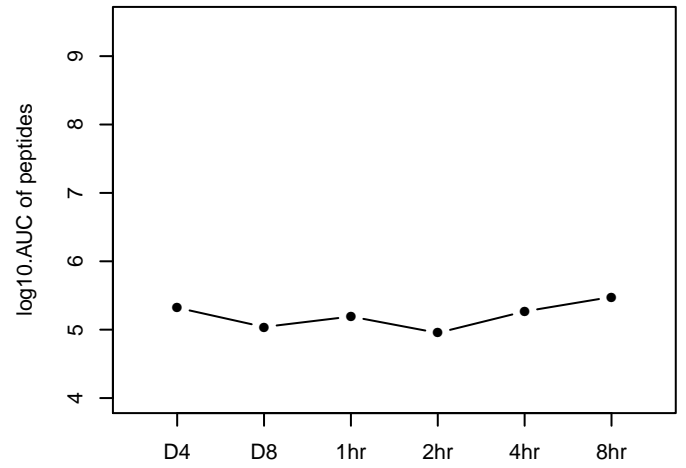

### SF3B1\_HUMAN

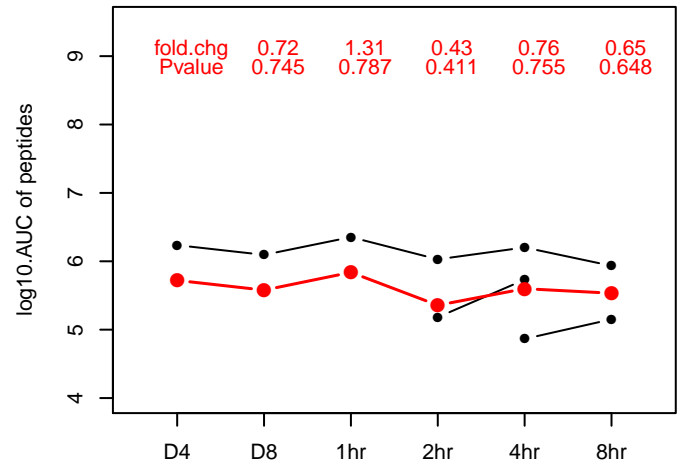

### SF3B2\_HUMAN

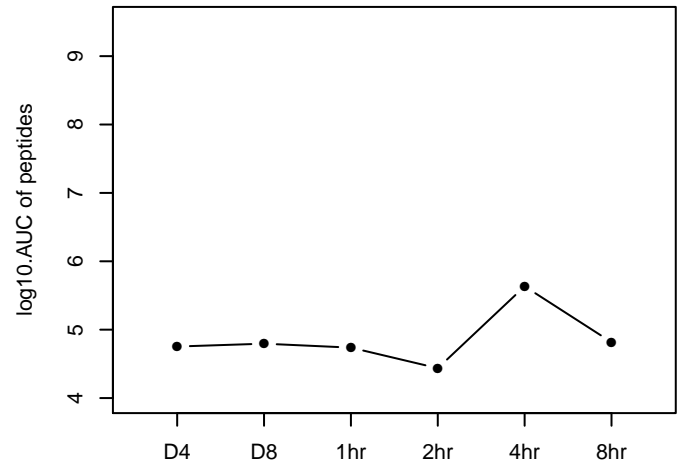

**SF3B5\_HUMAN**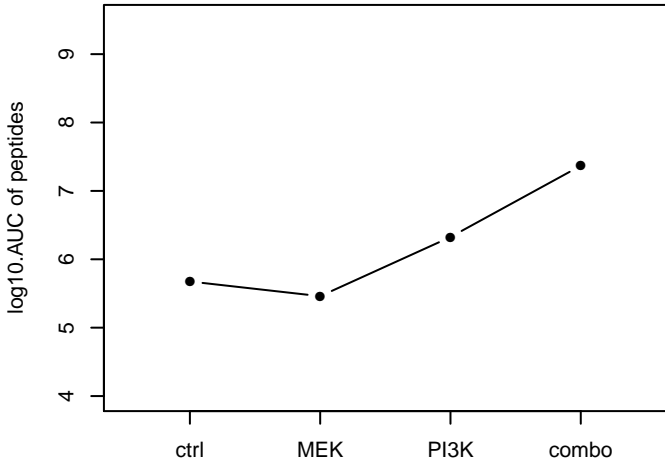**SF3B5\_HUMAN**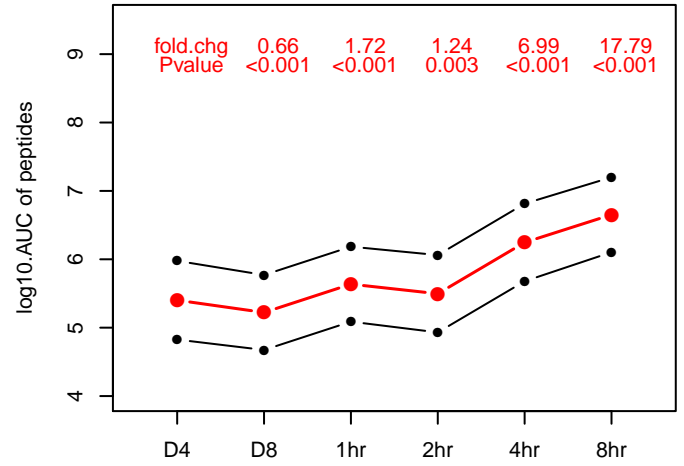**SFSWA\_HUMAN**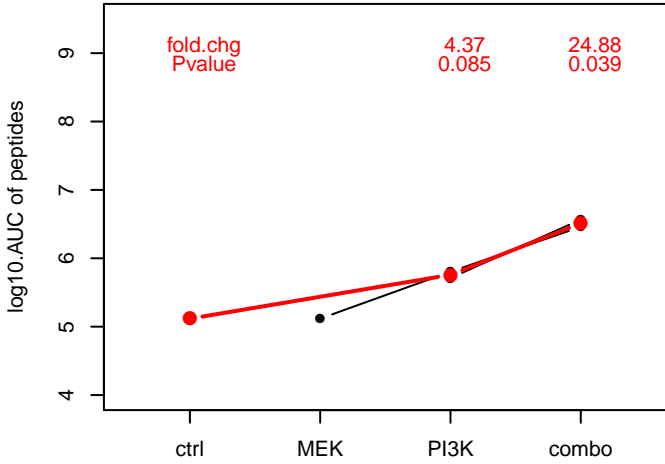**SFSWA\_HUMAN**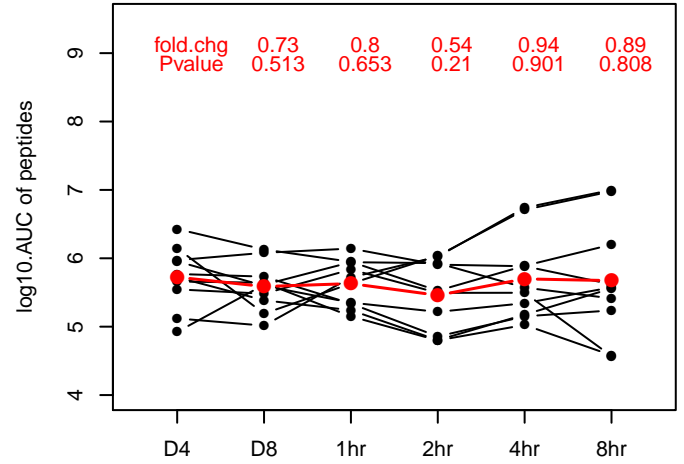**SG223\_HUMAN**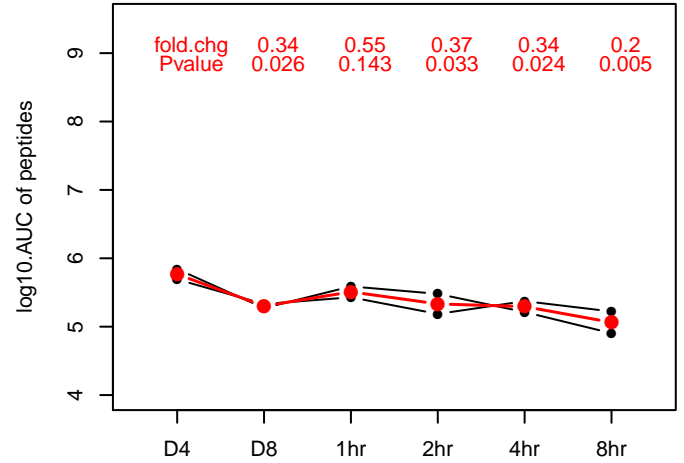

**SI1L1\_HUMAN**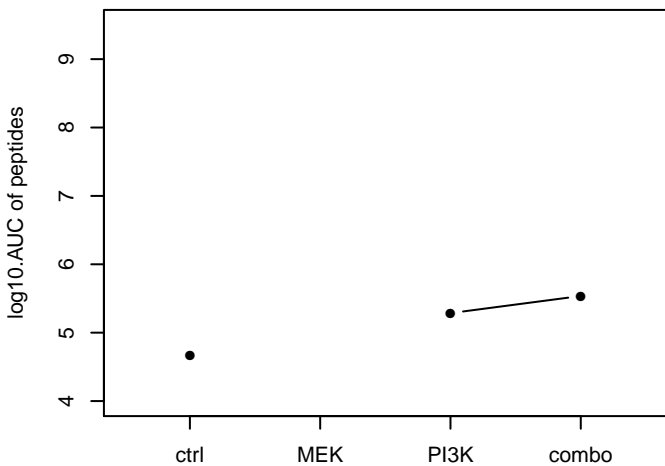**SI1L1\_HUMAN**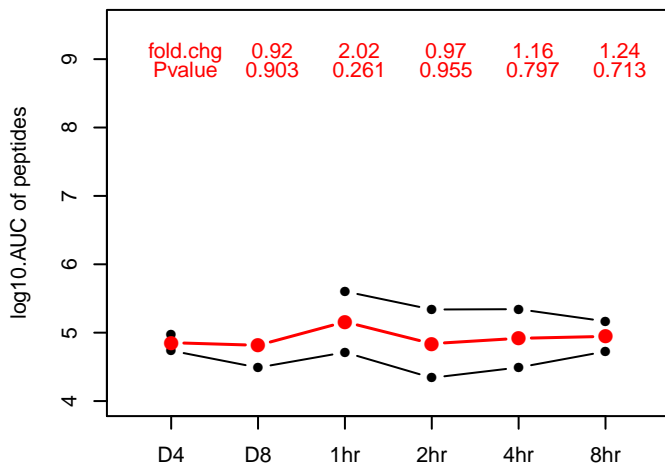**SIN3A\_HUMAN**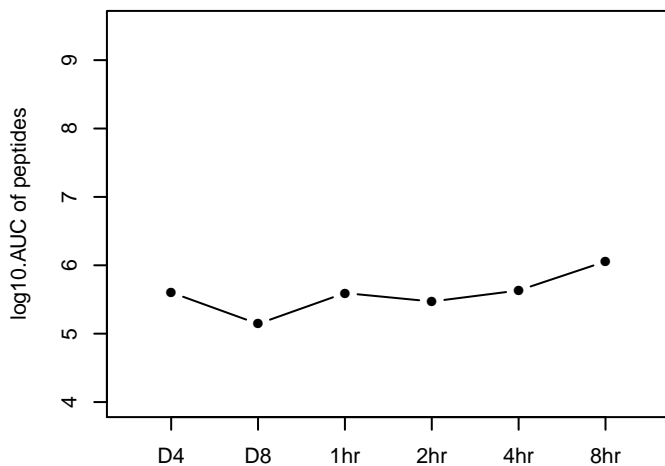**SL9A1\_HUMAN**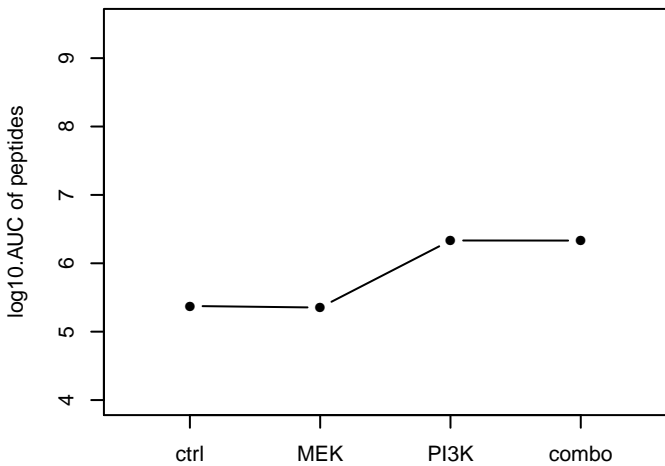**SL9A1\_HUMAN**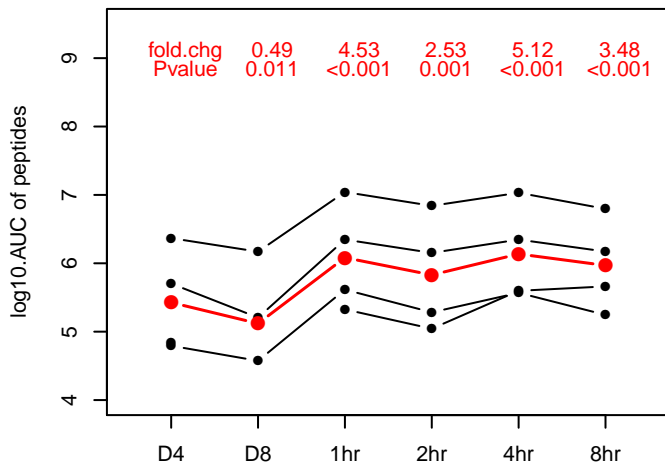

### SLK\_HUMAN

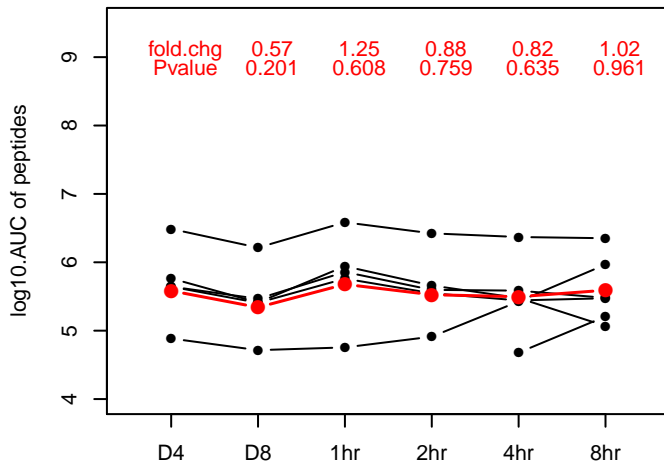

### SMAP\_HUMAN

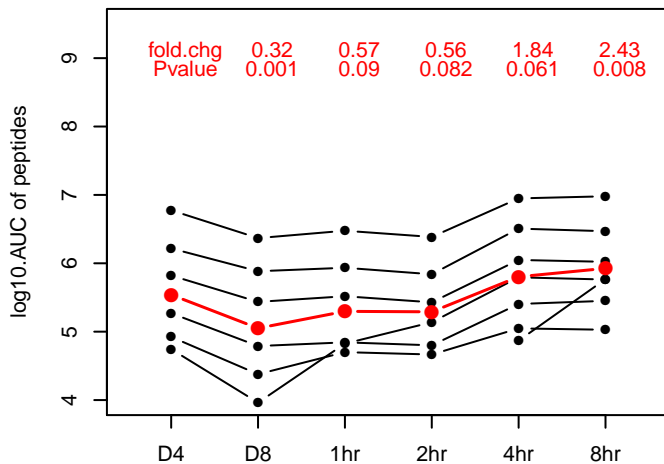

### SMC1A\_HUMAN

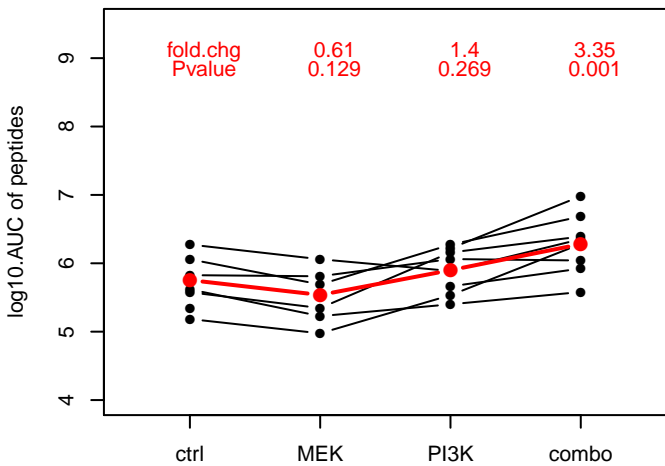

### SMC1A\_HUMAN

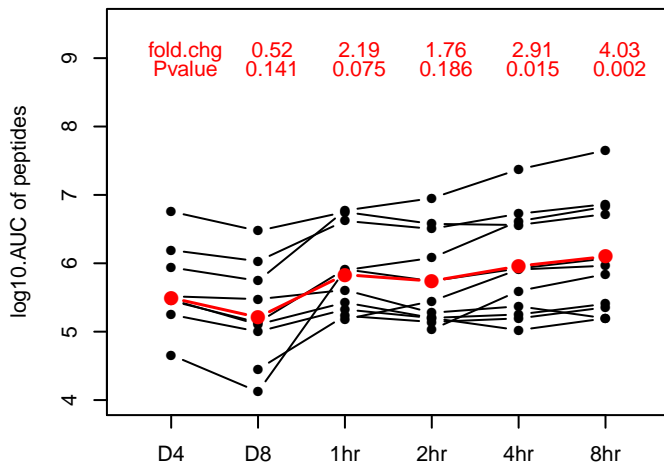

**SMC3\_HUMAN**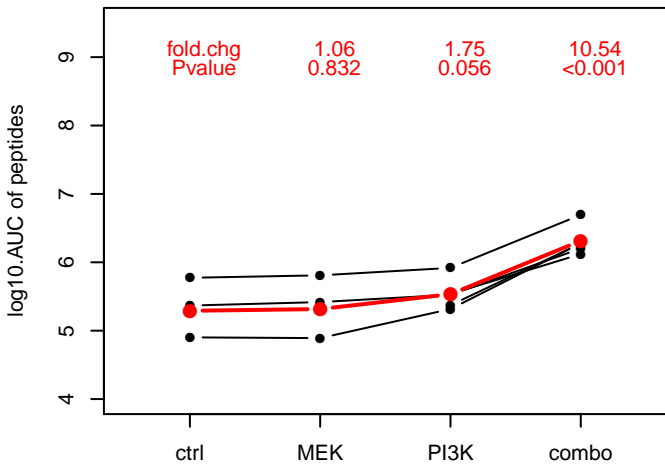**SMC3\_HUMAN**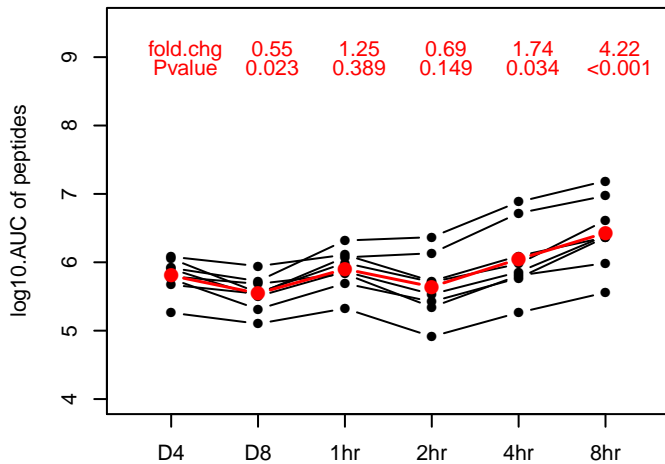**SMCA2\_HUMAN**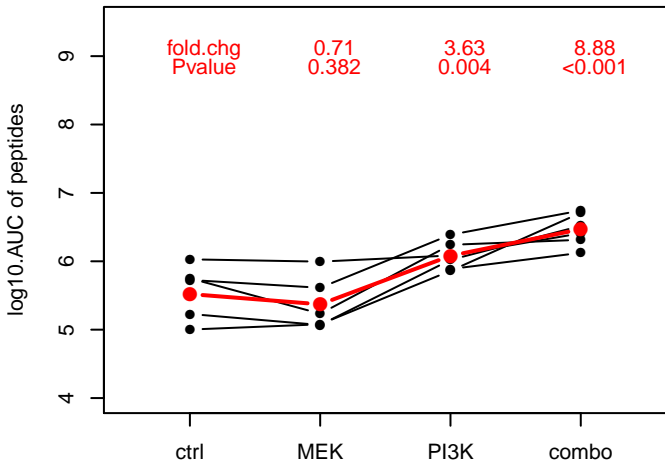**SMCA2\_HUMAN**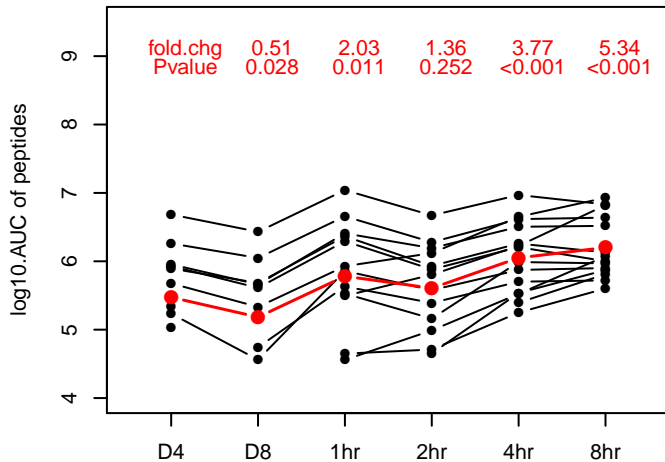**SMCA4\_HUMAN**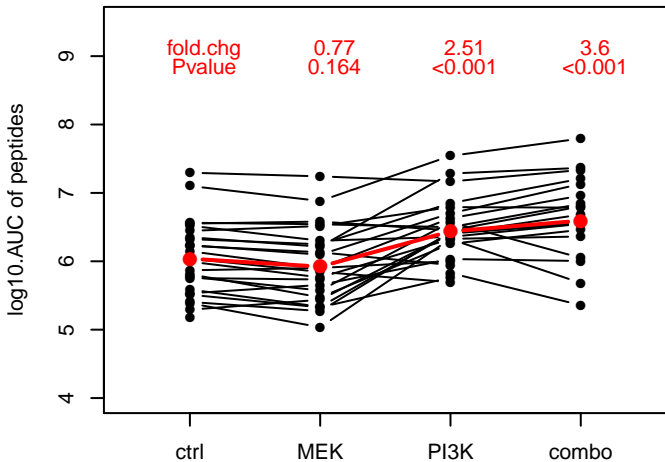**SMCA4\_HUMAN**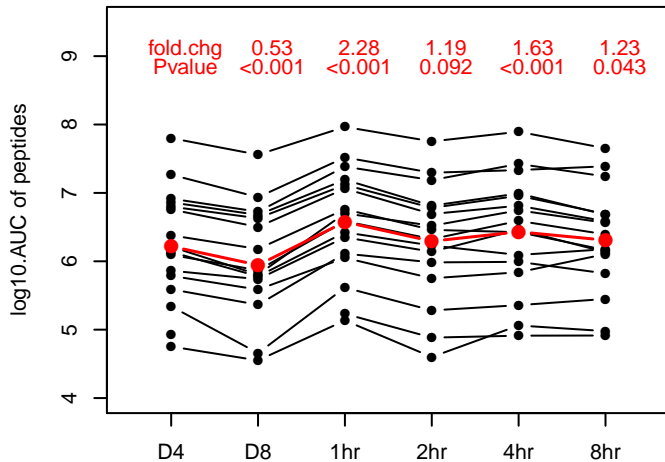



### SMD2\_HUMAN

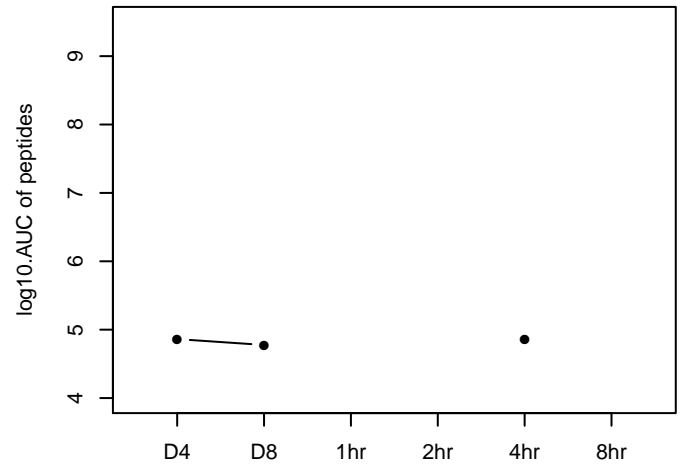

### SMG1\_HUMAN

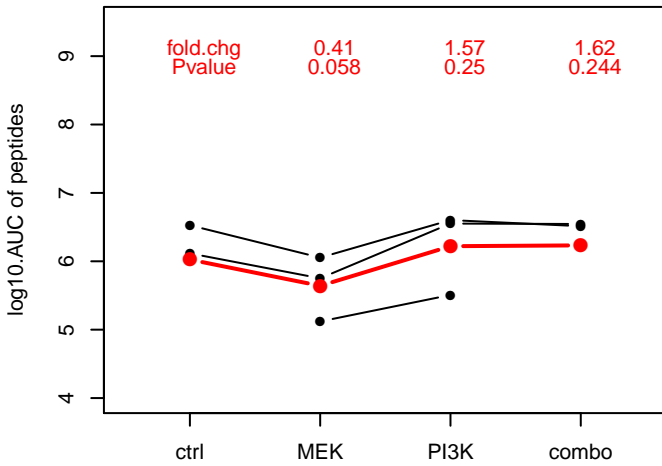

### SMG1\_HUMAN

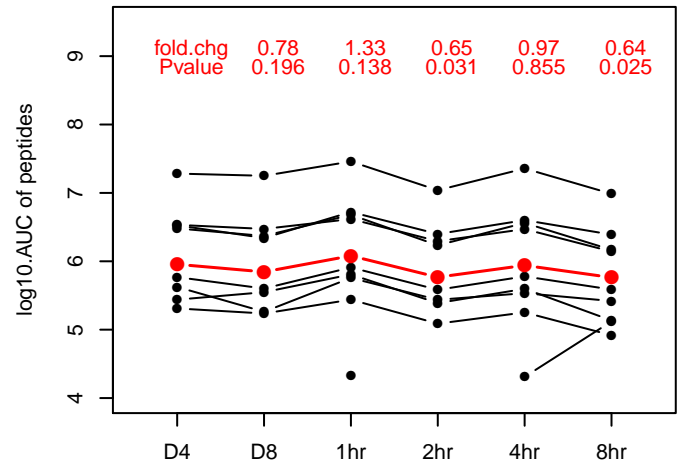

### SMG5\_HUMAN

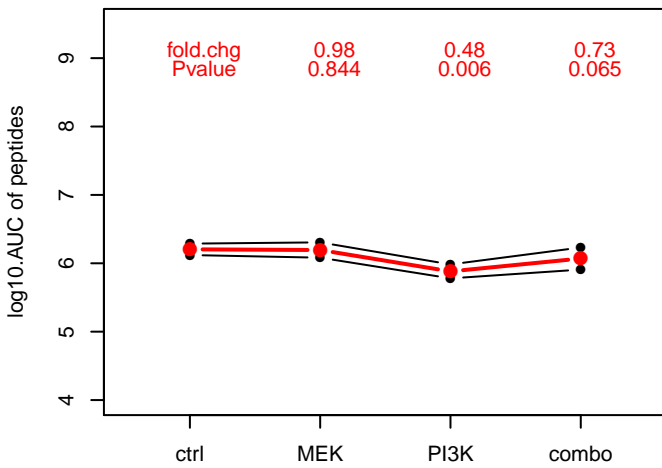

### SMG5\_HUMAN

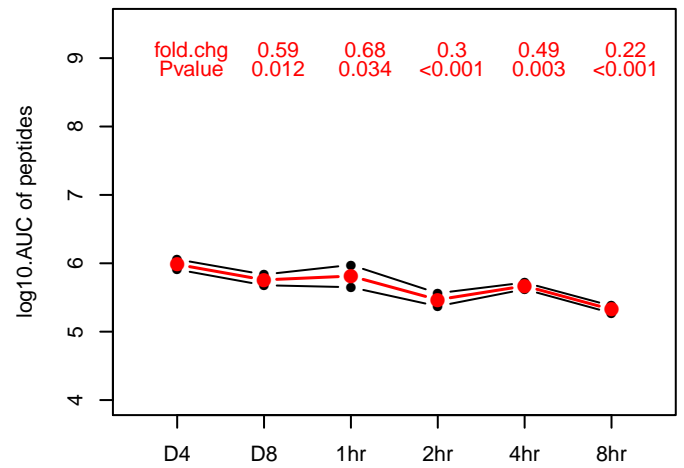

### SMRC2\_HUMAN

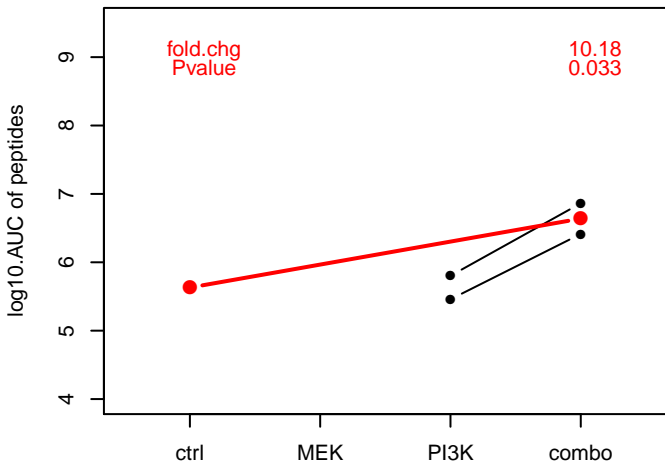

### SMRC2\_HUMAN

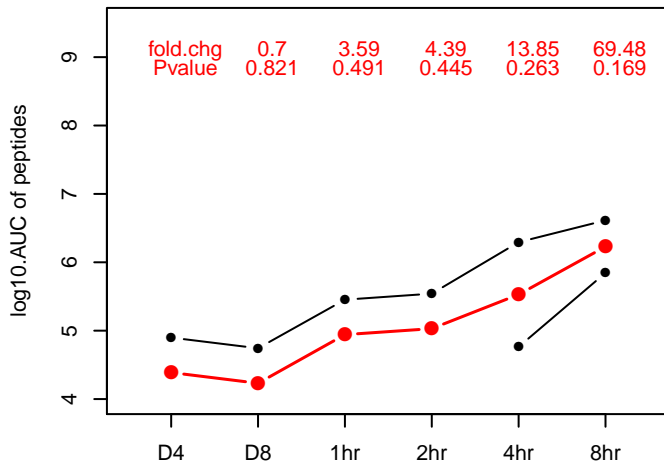

### SMRD1\_HUMAN

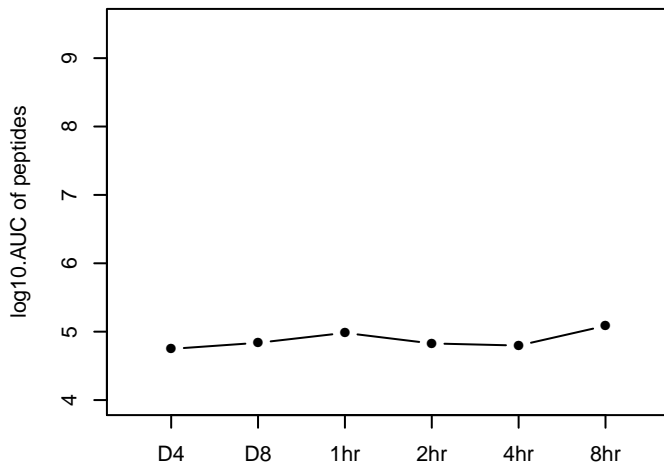

### SND1\_HUMAN

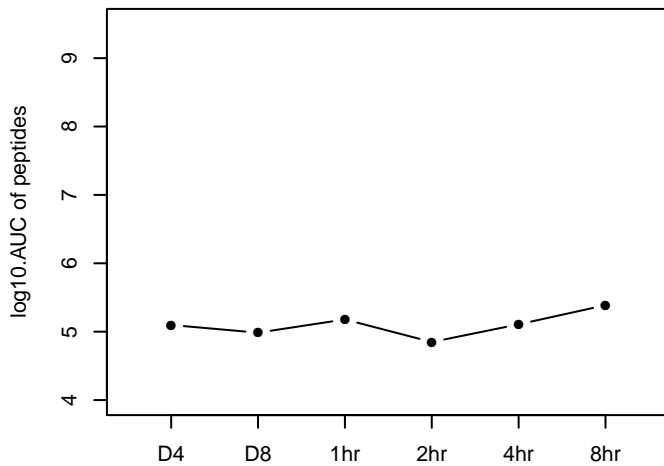

### SNF5\_HUMAN

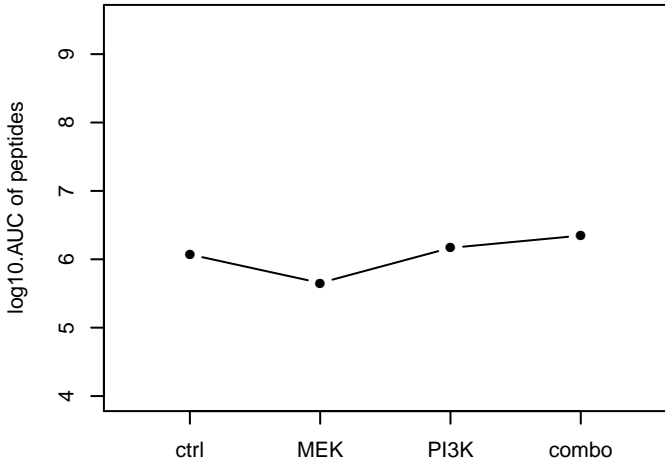

### SNF5\_HUMAN

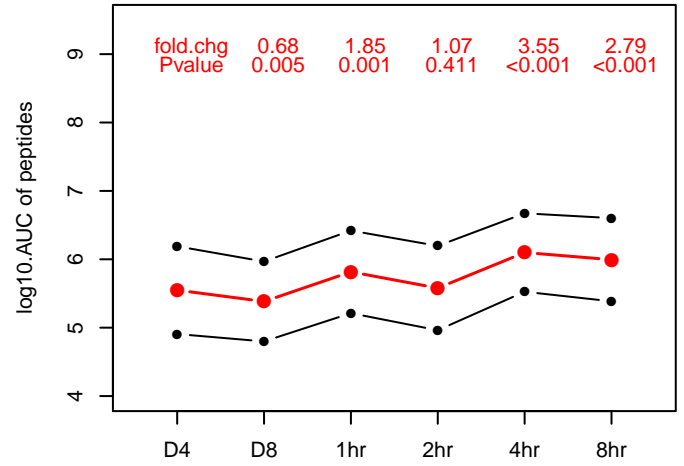

### SNIP1\_HUMAN

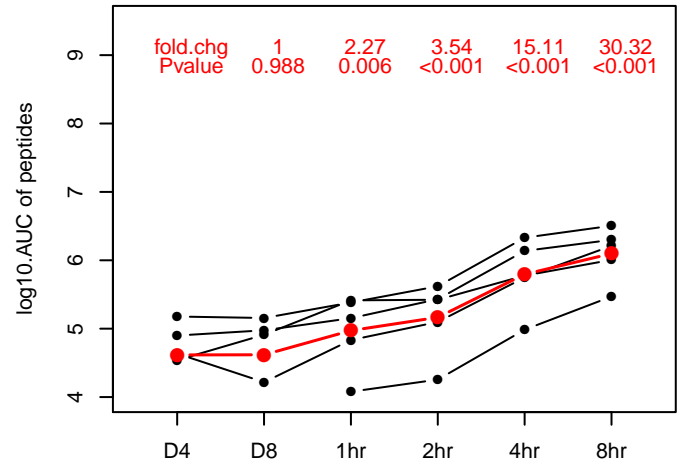

### SNP23\_HUMAN

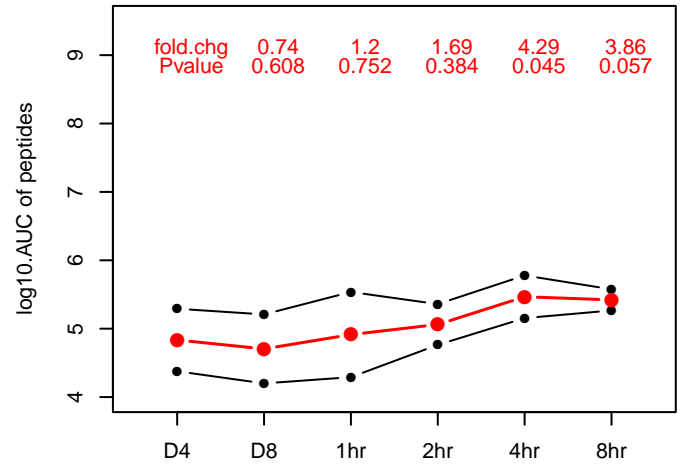

**SNUT1\_HUMAN**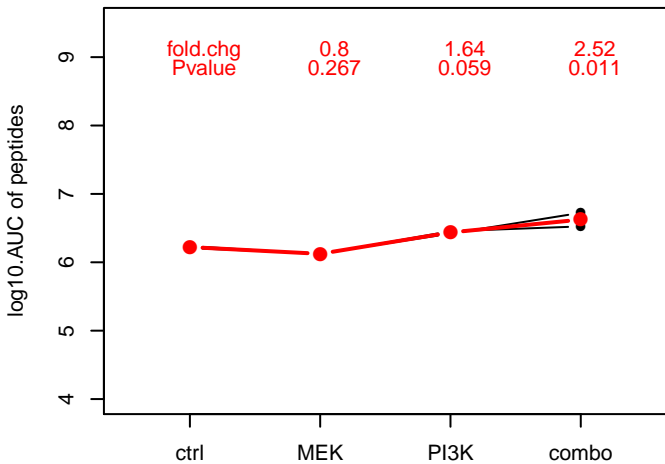**SNUT1\_HUMAN**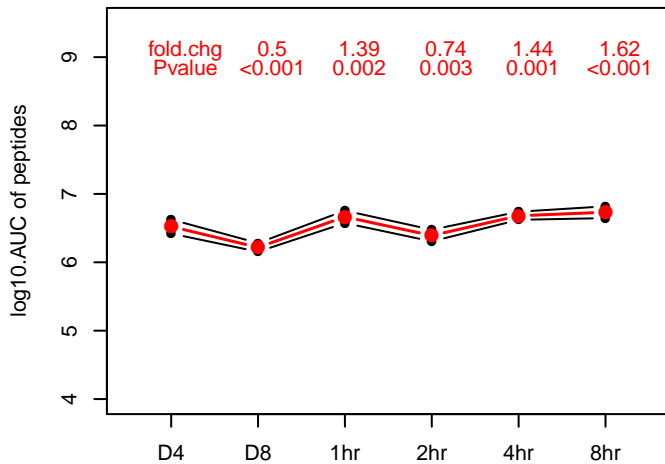**SNX1\_HUMAN**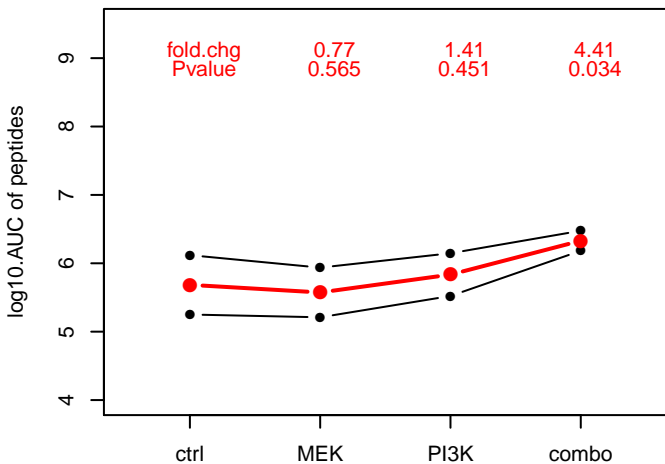**SNX1\_HUMAN**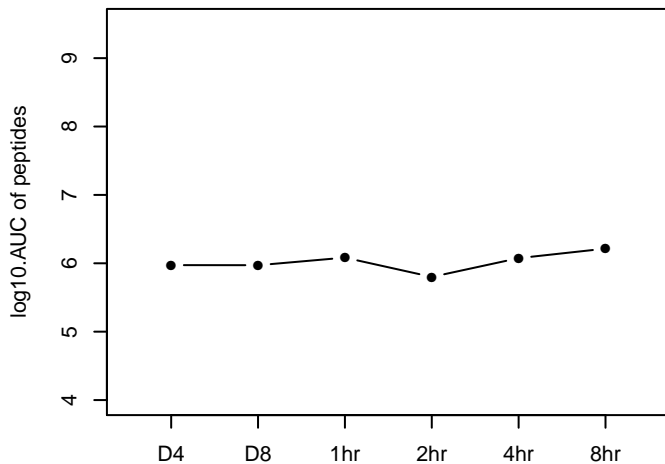**SNX17\_HUMAN**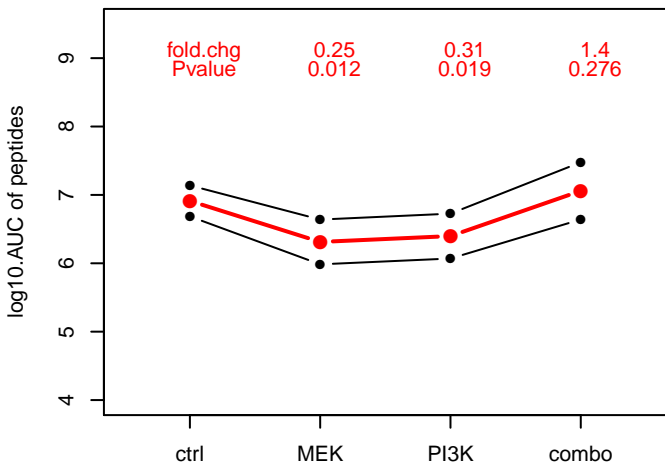**SNX17\_HUMAN**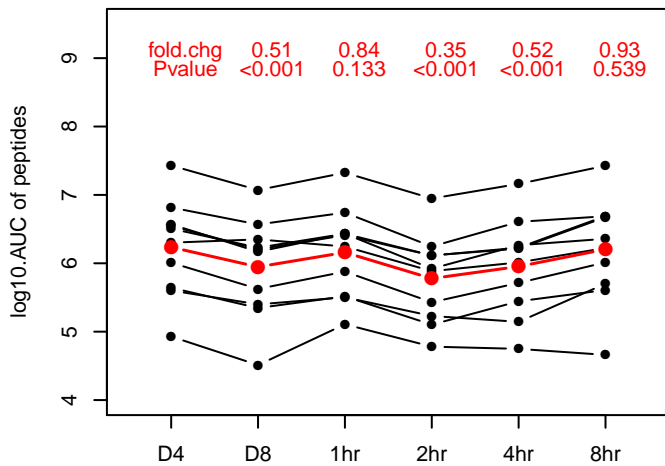

### SP110\_HUMAN

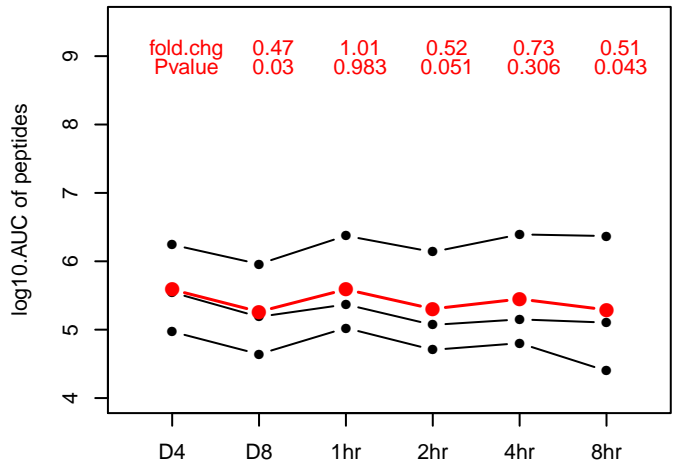

### SPAG5\_HUMAN

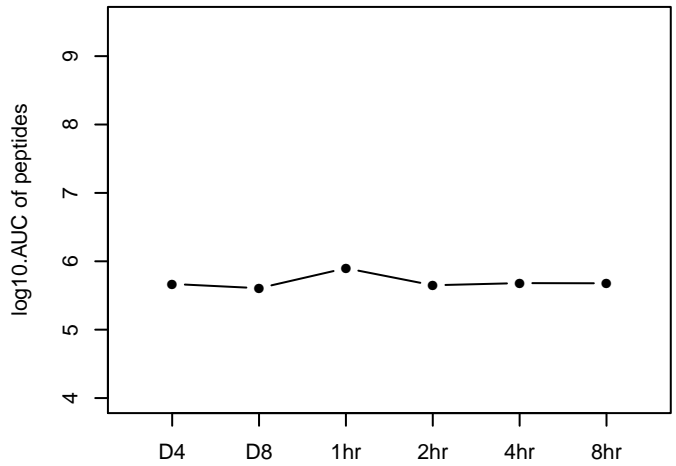

### SPD2B\_HUMAN

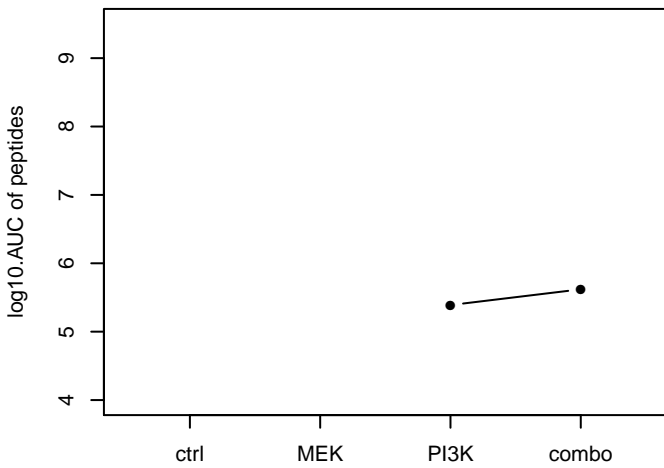

### SPD2B\_HUMAN

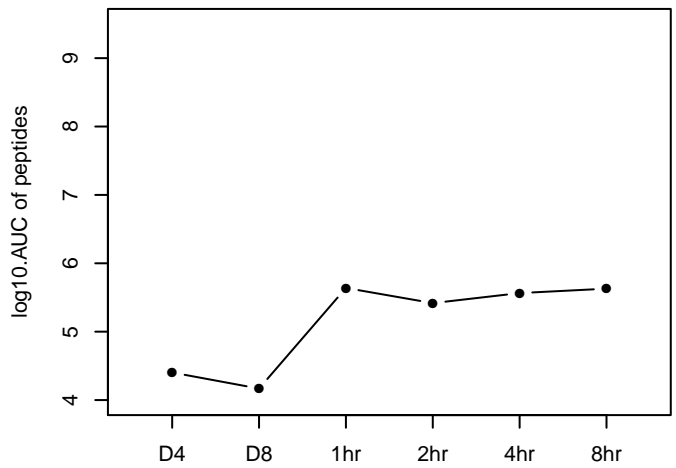

### SPF30\_HUMAN

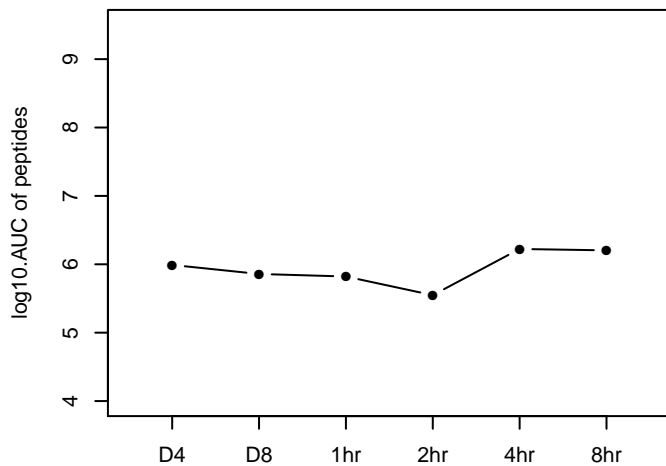

### SPG20\_HUMAN

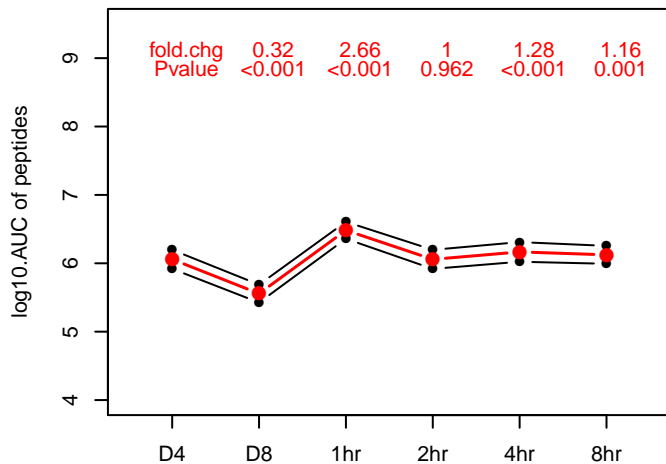

### SPIR1\_HUMAN

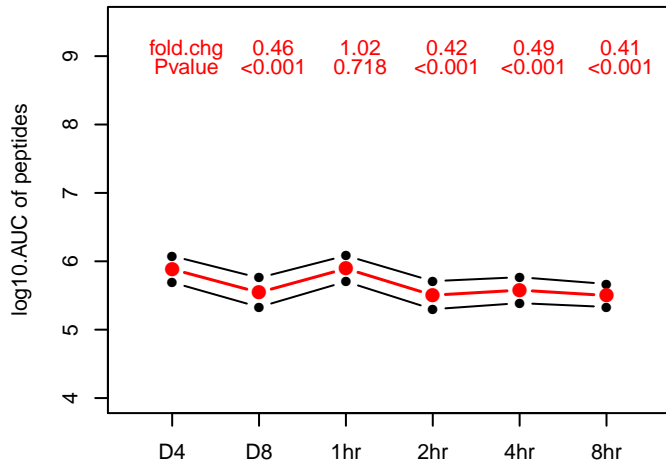

SPS2L\_HUMAN

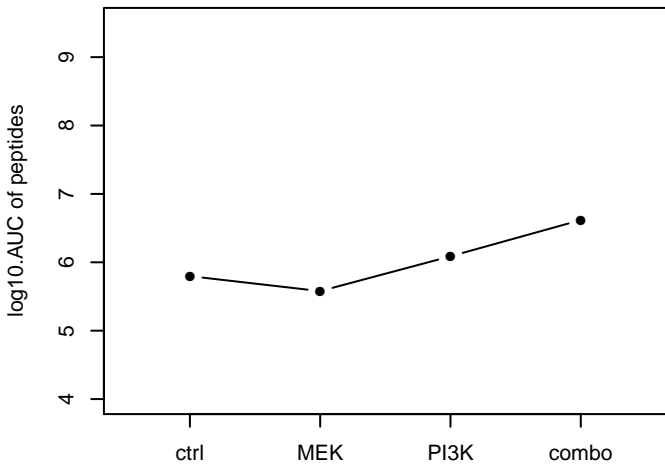

SPS2L\_HUMAN

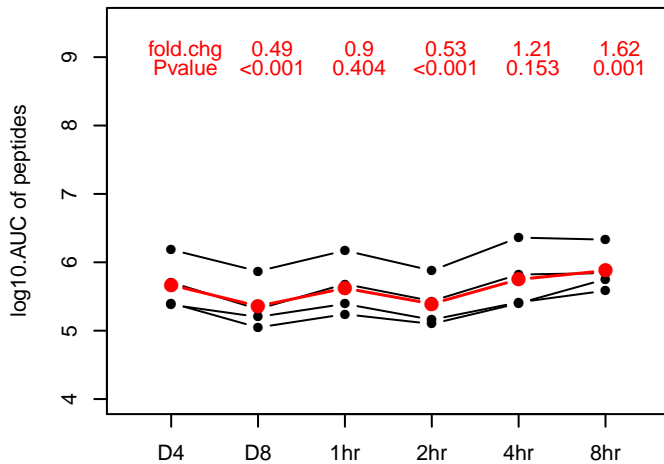

SPT5H\_HUMAN

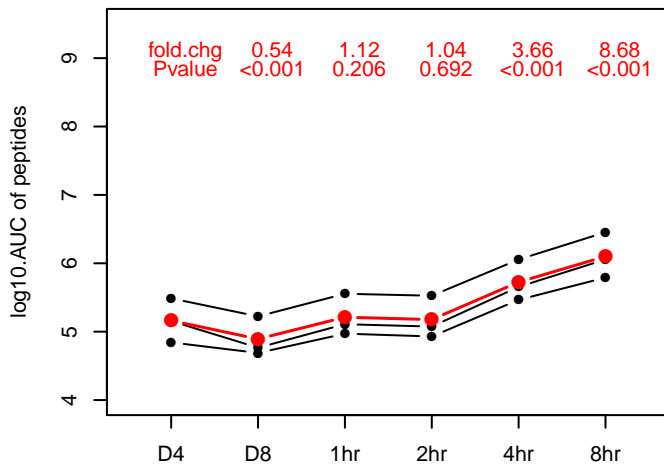

SPTB2\_HUMAN

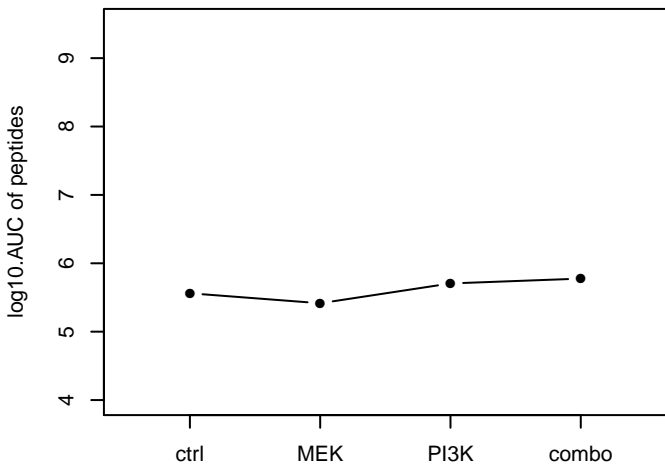

SPTB2\_HUMAN

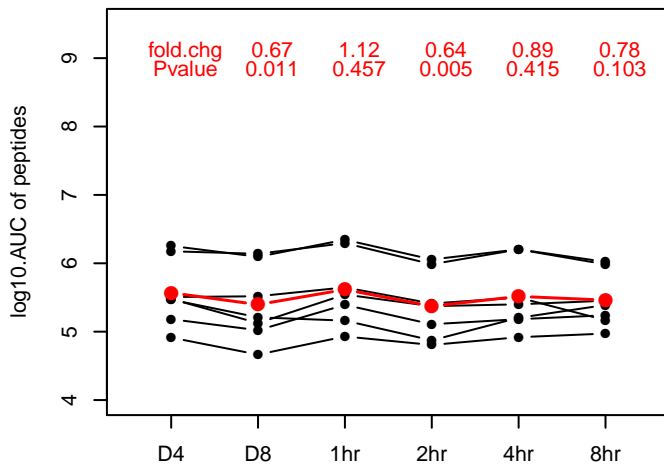

### SQSTM\_HUMAN

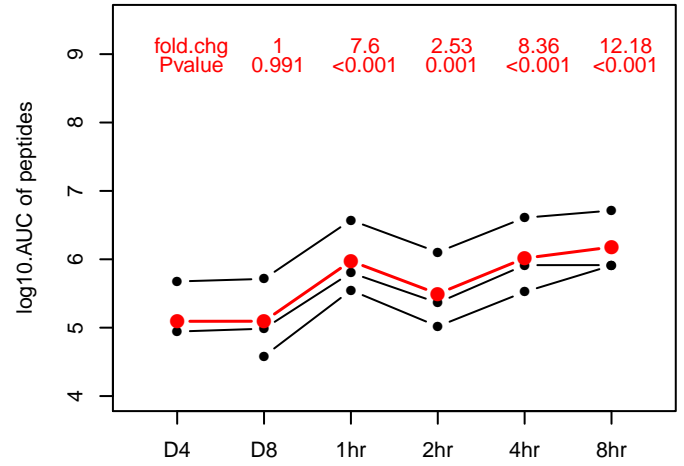

### SRC8\_HUMAN

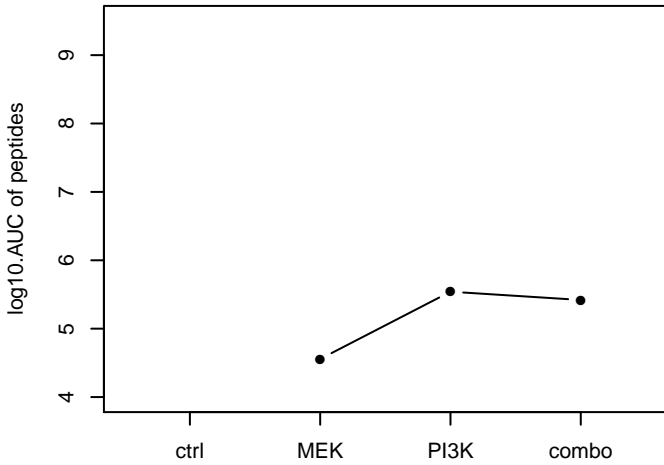

### SRC8\_HUMAN

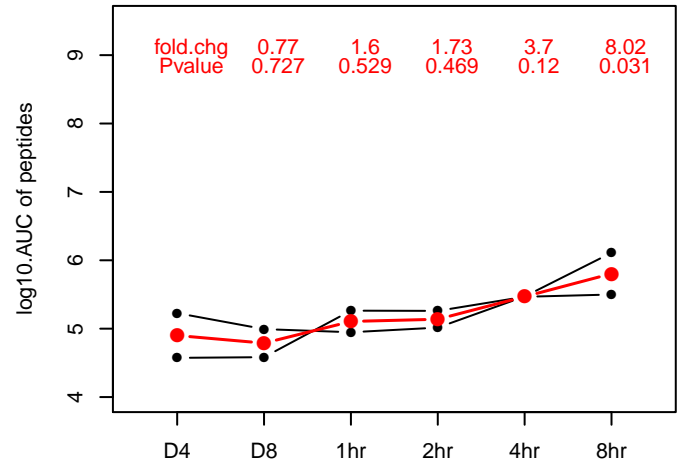

### SRGEF\_HUMAN

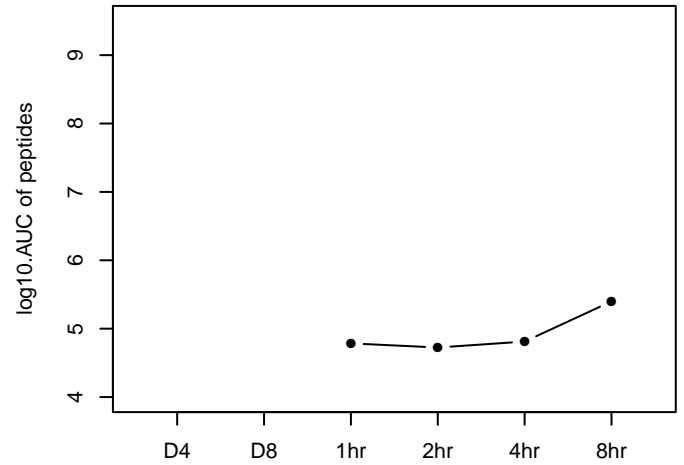



### SRGP1\_HUMAN

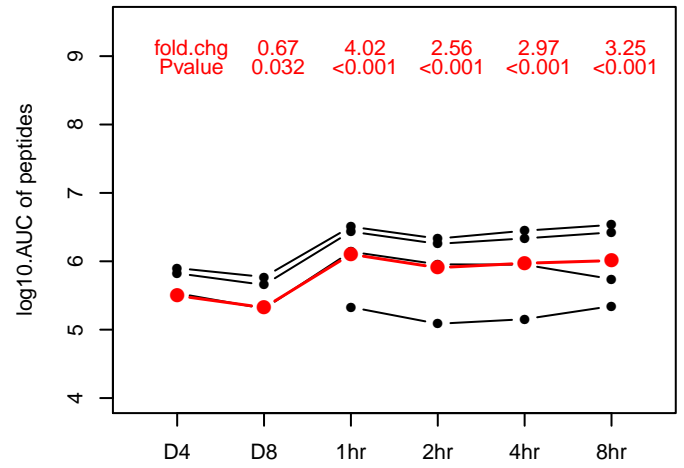

### SRP68\_HUMAN

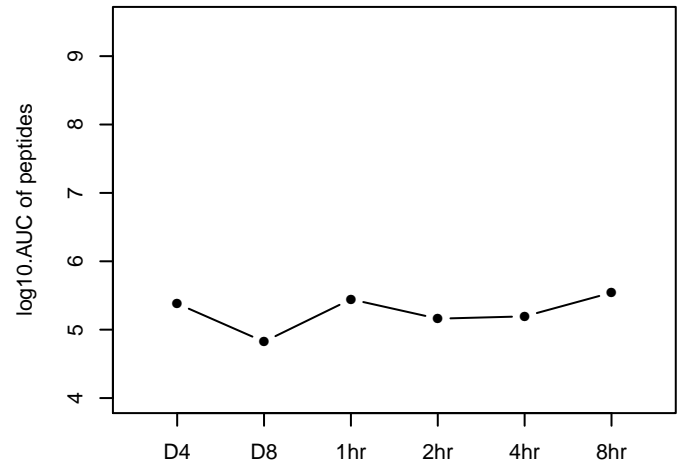

### SRPK1\_HUMAN

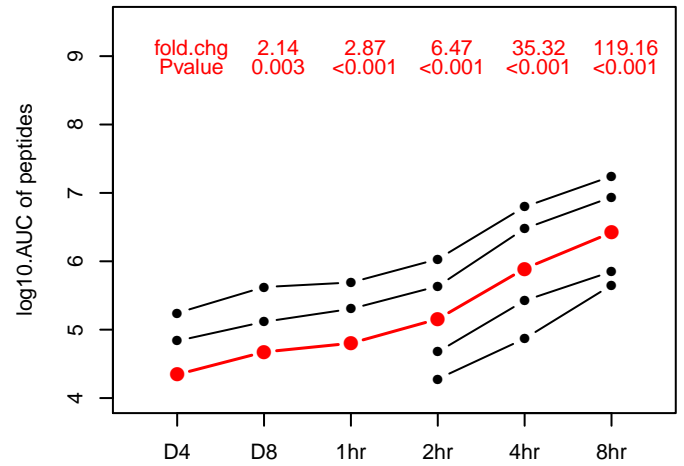

### SRRM2\_HUMAN

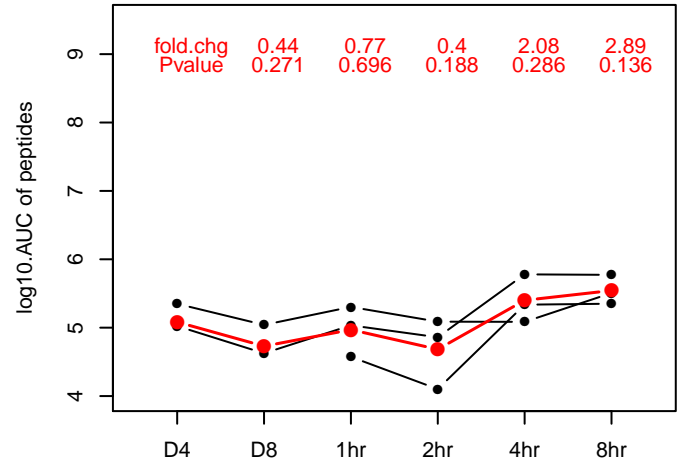

### SSFA2\_HUMAN

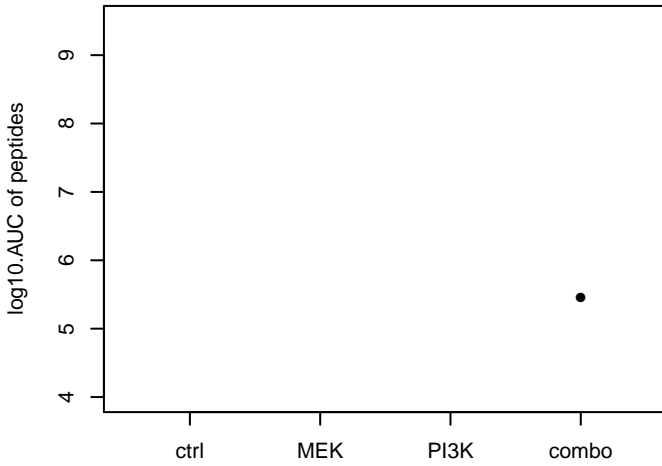

### SSFA2\_HUMAN

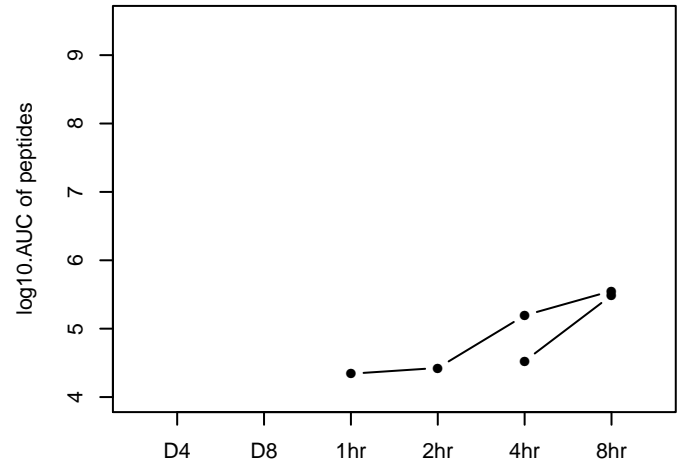

### SSRP1\_HUMAN

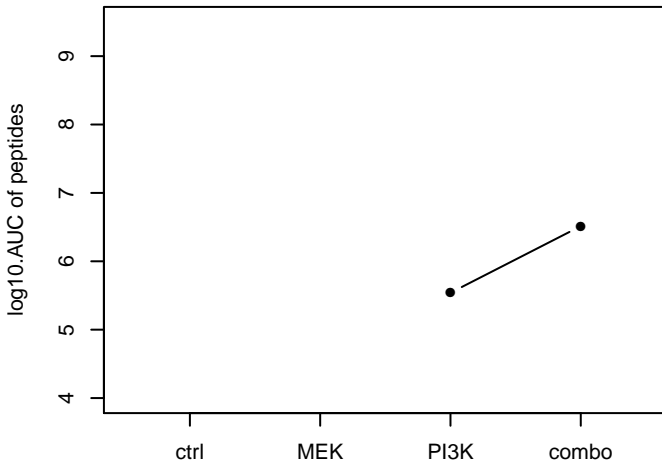

### SSRP1\_HUMAN

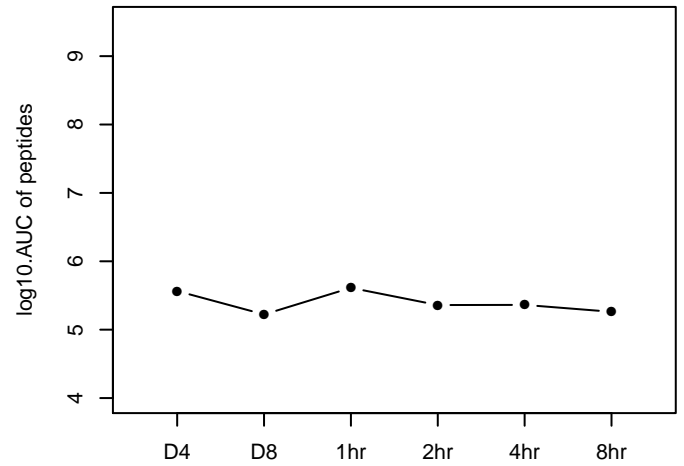

**STEA1\_HUMAN**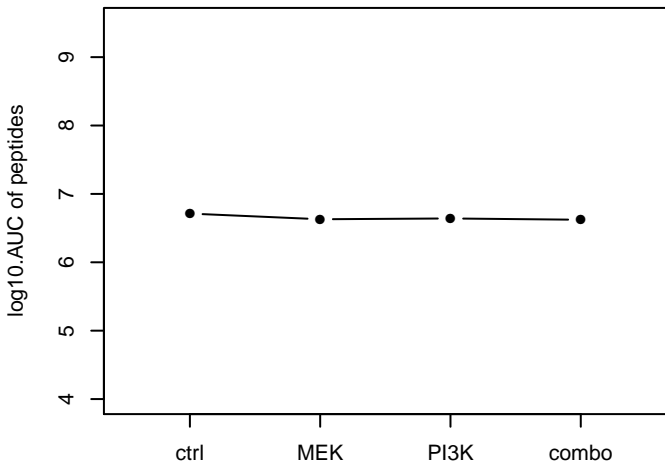**STEA1\_HUMAN**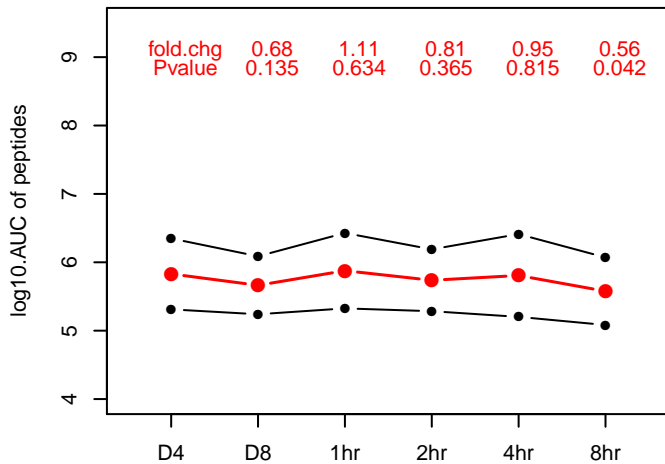**STIM1\_HUMAN**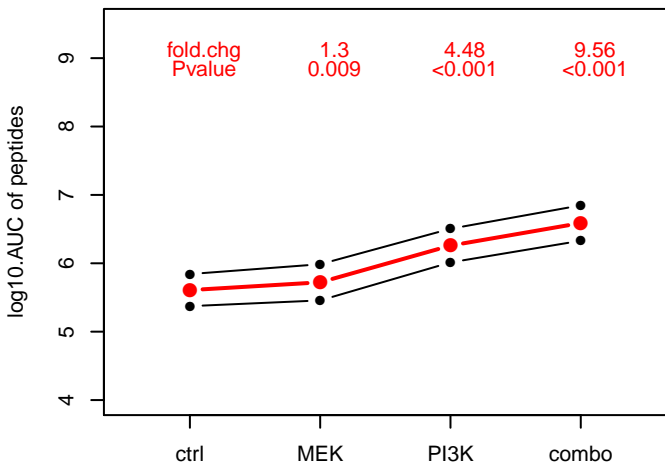**STIM1\_HUMAN**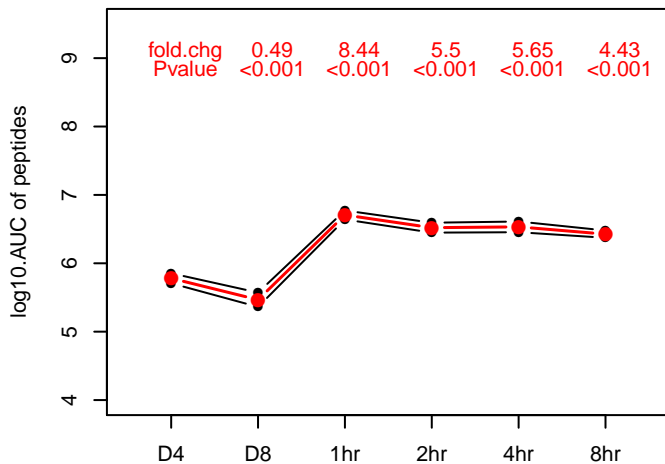**STK10\_HUMAN**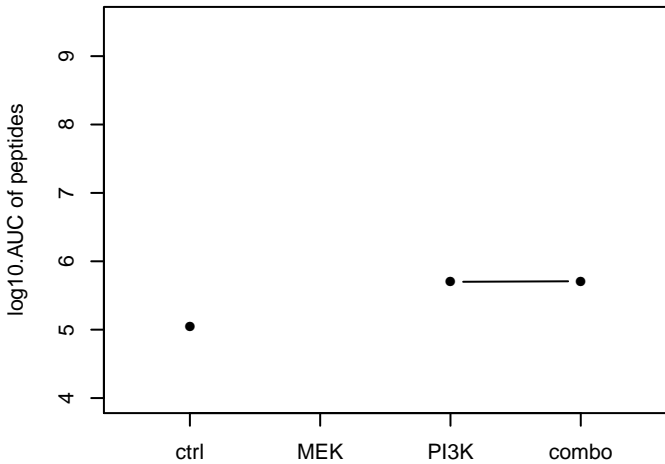**STK10\_HUMAN**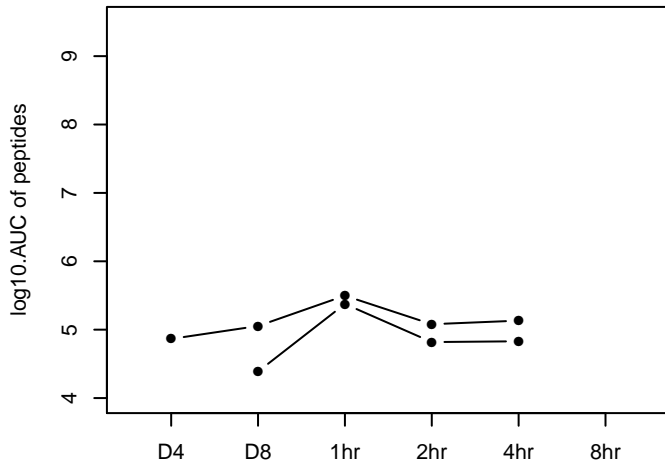

**STML1\_HUMAN**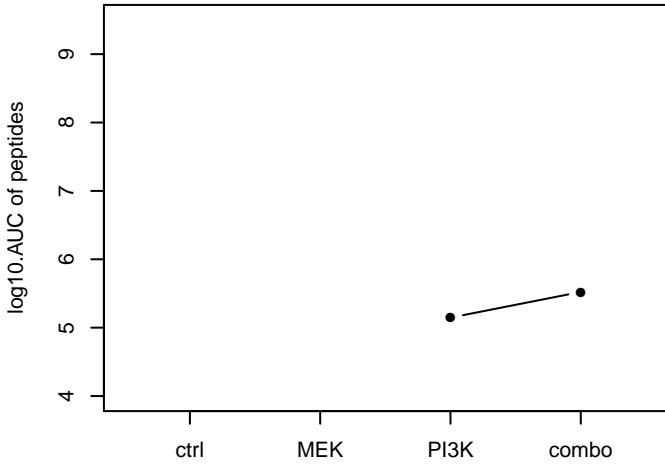**STML1\_HUMAN**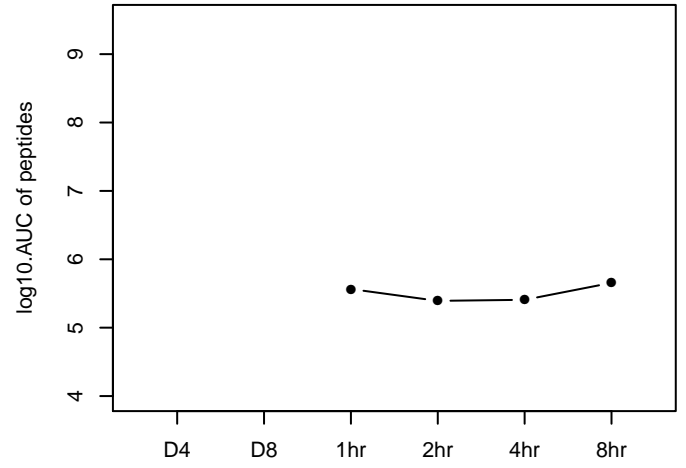**STX5\_HUMAN**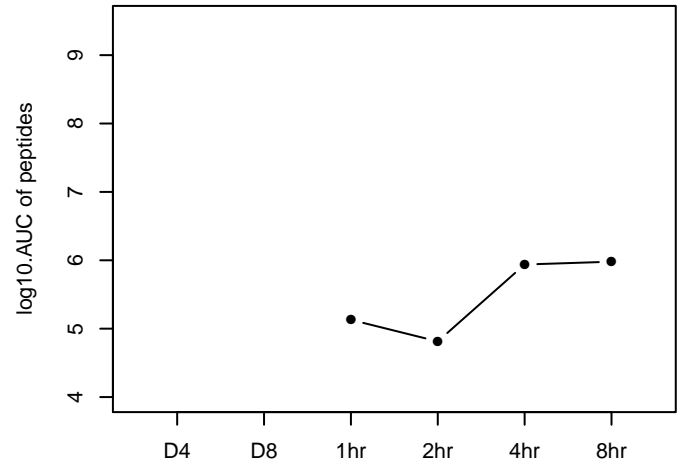**SUGP2\_HUMAN**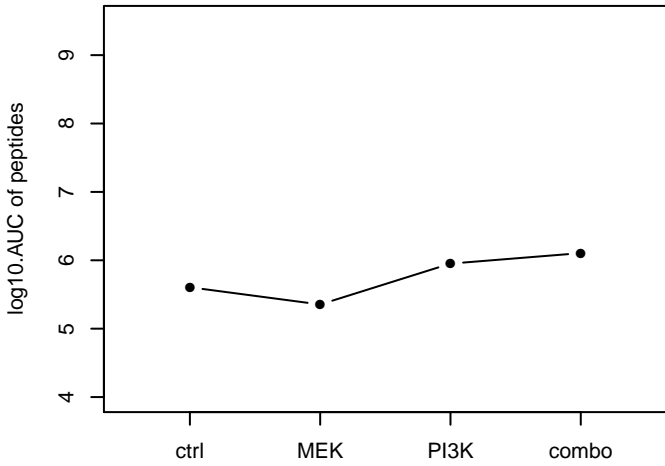**SUGP2\_HUMAN**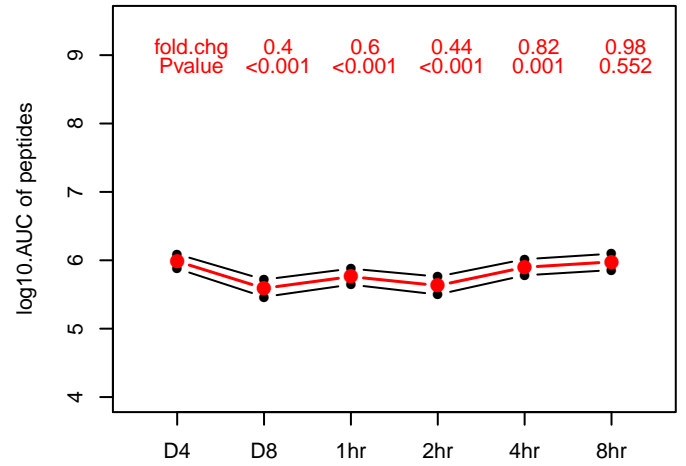

### SUN2\_HUMAN

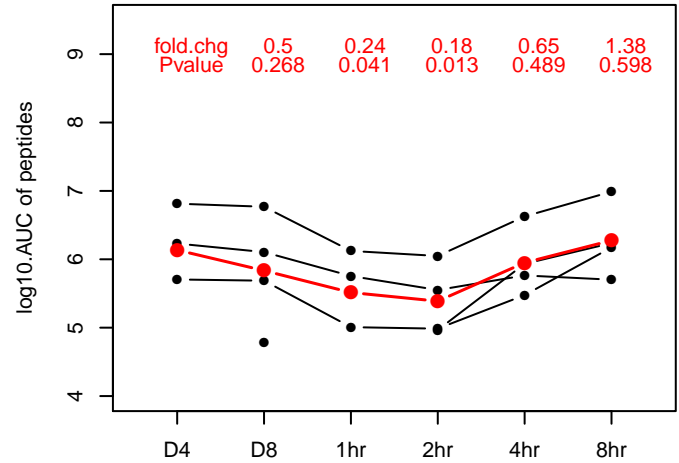

### SV2A\_HUMAN

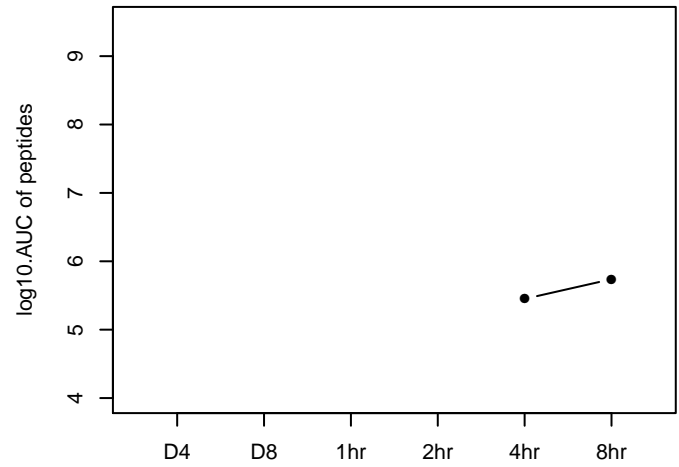

### SVIL\_HUMAN

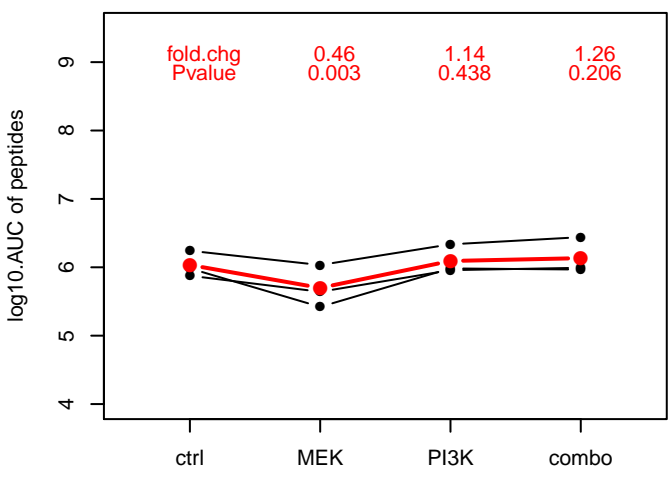

### SVIL\_HUMAN

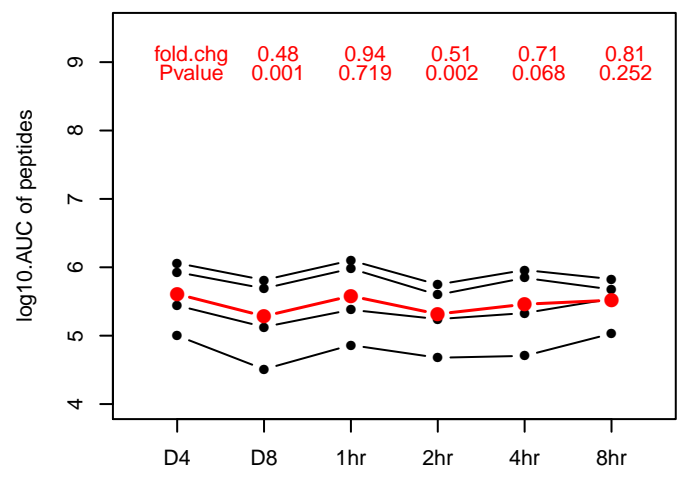

**SYFA\_HUMAN**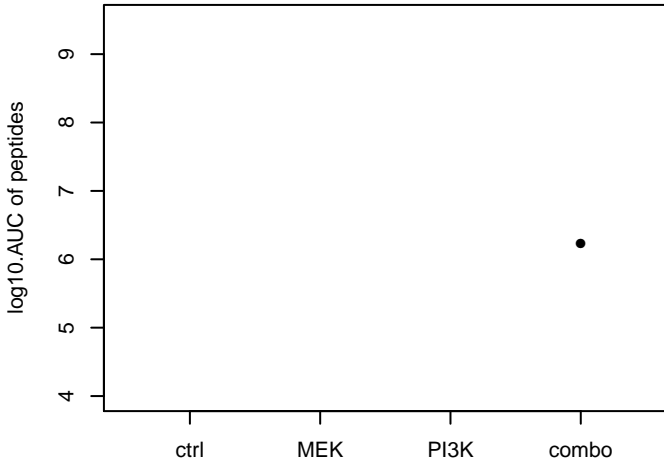**SYFA\_HUMAN**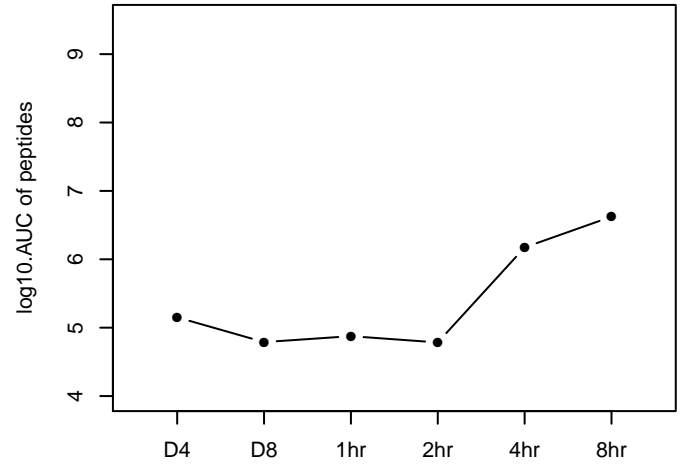**SYK\_HUMAN**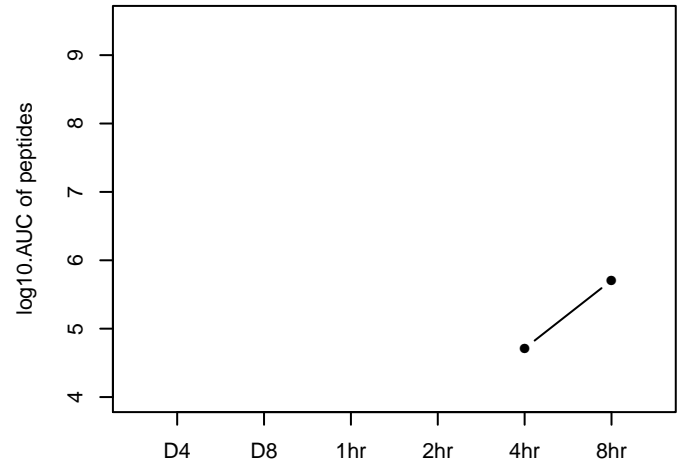**SYMPK\_HUMAN**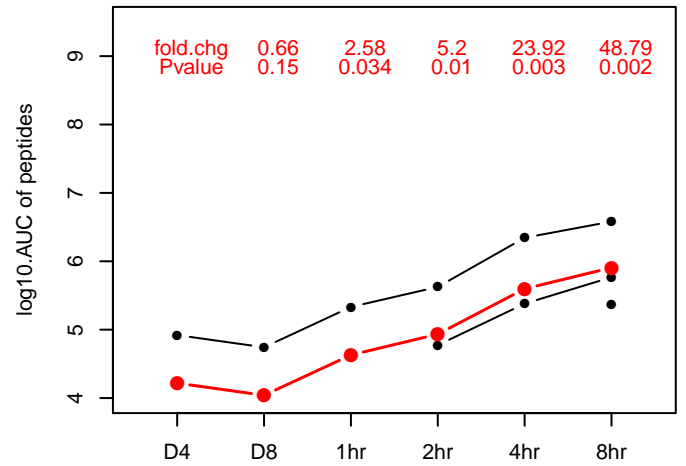

### SYNC\_HUMAN

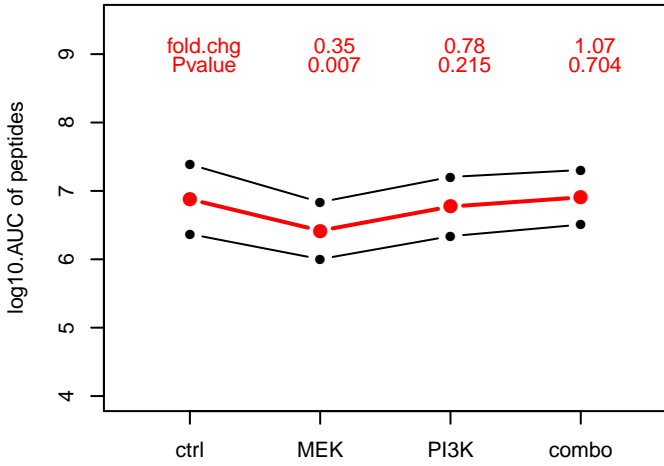

### SYNC\_HUMAN

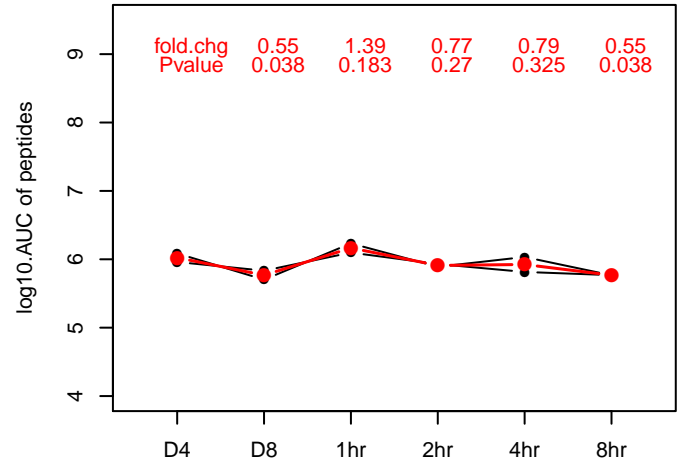

### SYNE2\_HUMAN

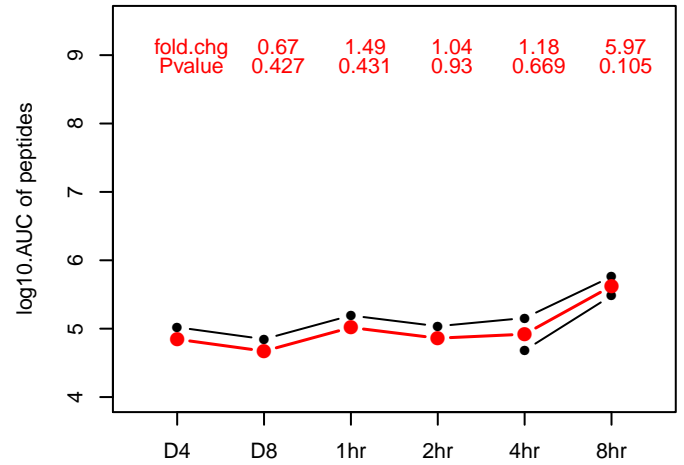

### SYNEM\_HUMAN

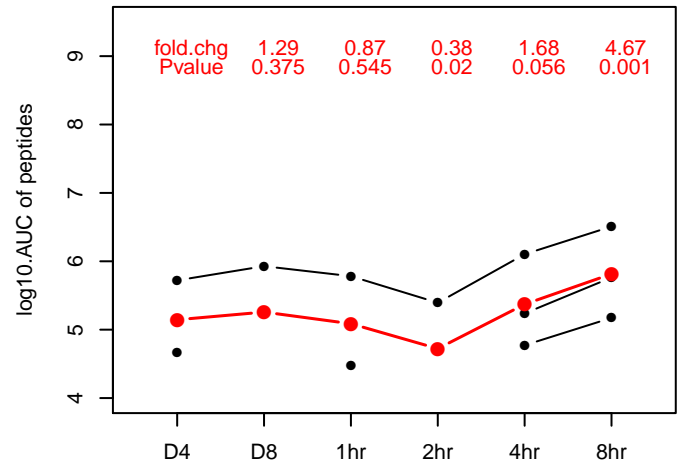

**SYSC\_HUMAN**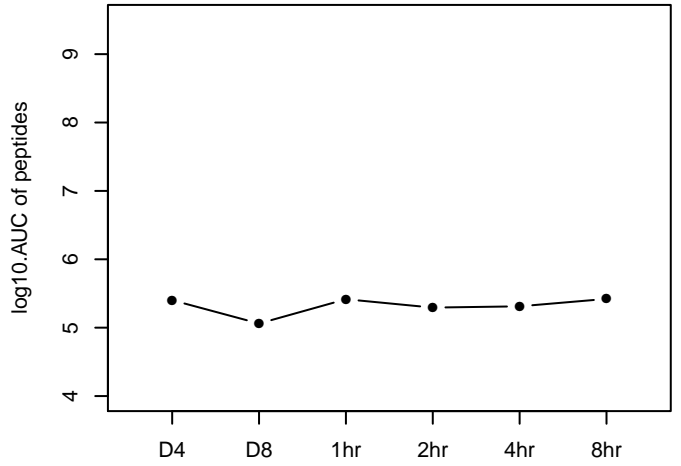**T2FB\_HUMAN**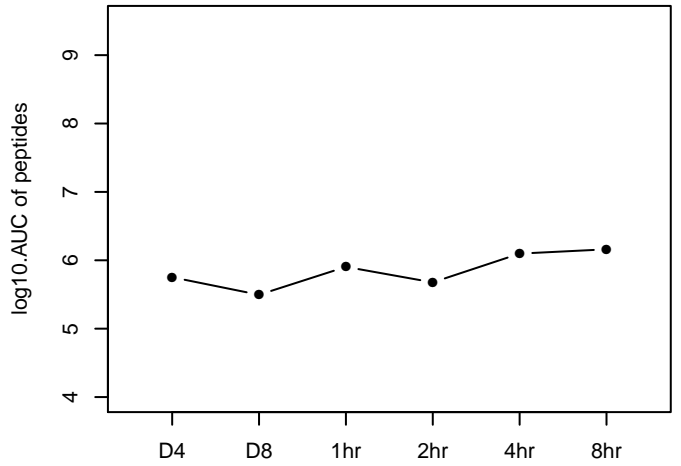**TACC1\_HUMAN**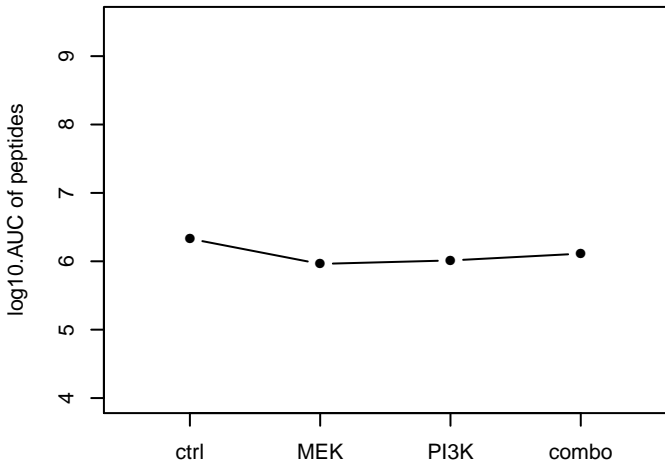**TACC1\_HUMAN**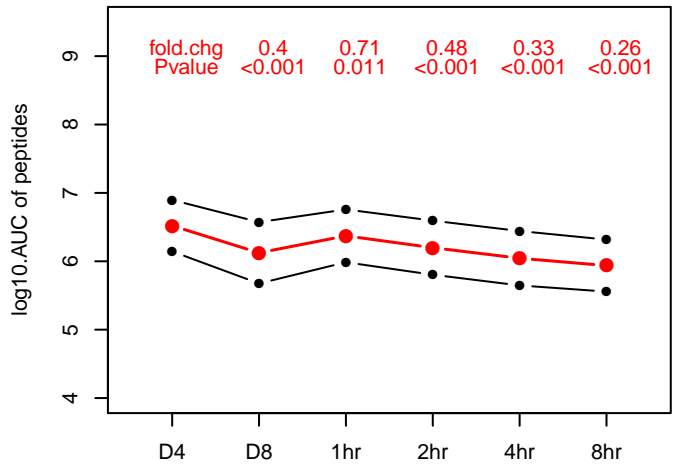



**TACC3\_HUMAN**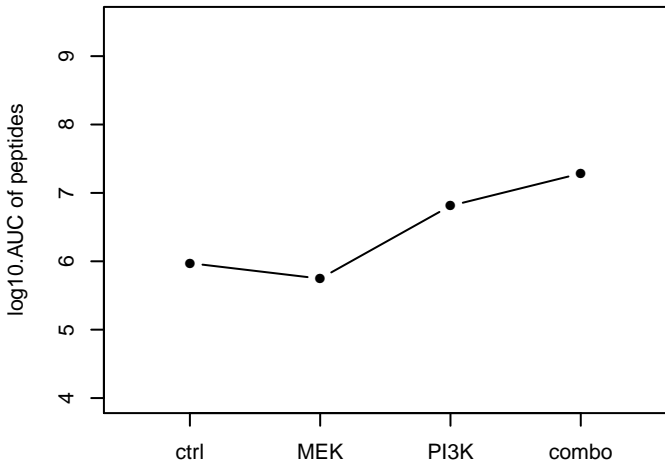**TACC3\_HUMAN**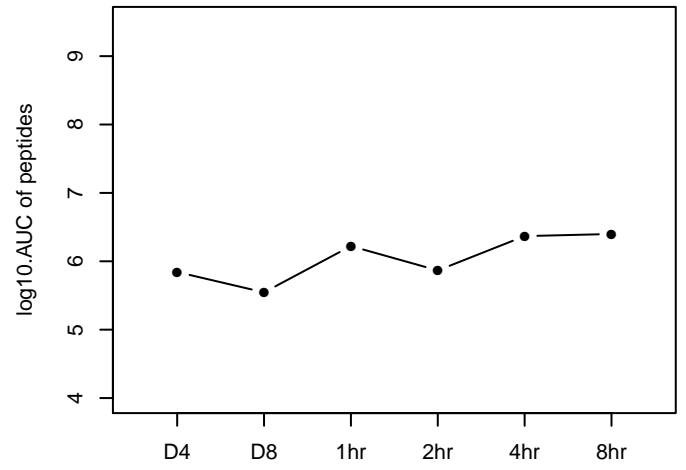**TAGL\_HUMAN**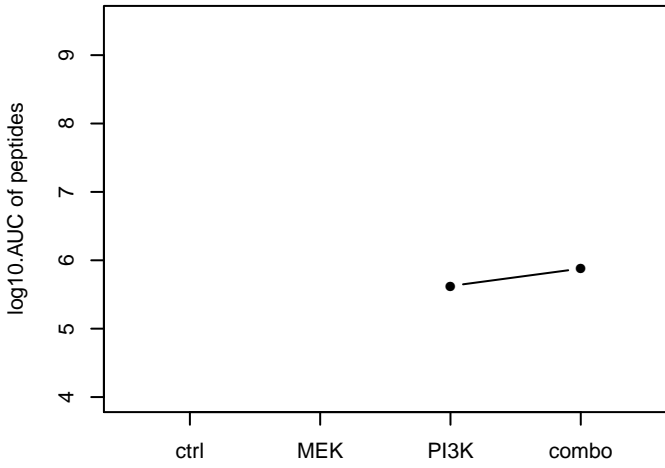**TANC1\_HUMAN**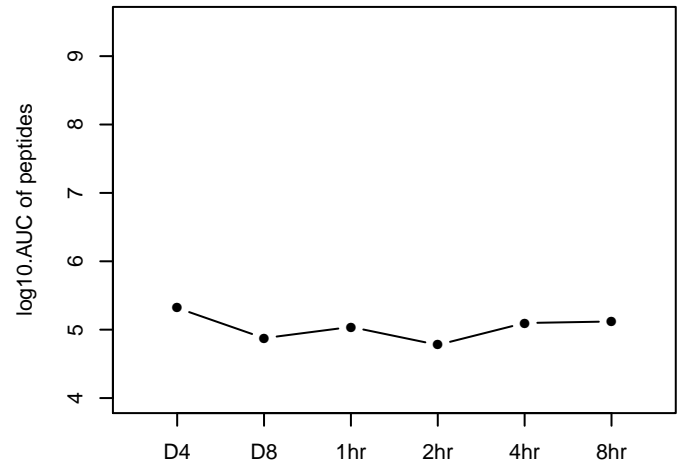

### TANC2\_HUMAN

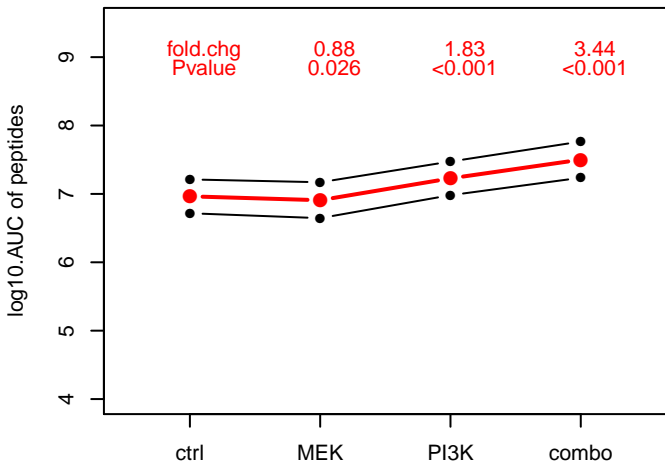

### TANC2\_HUMAN

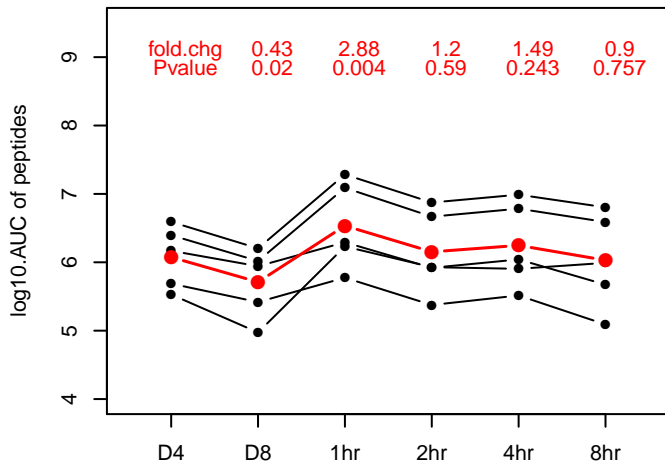

### TARA\_HUMAN

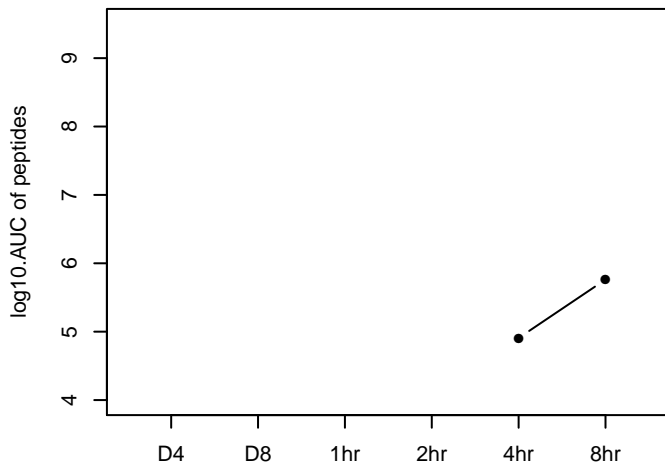

### TARB1\_HUMAN

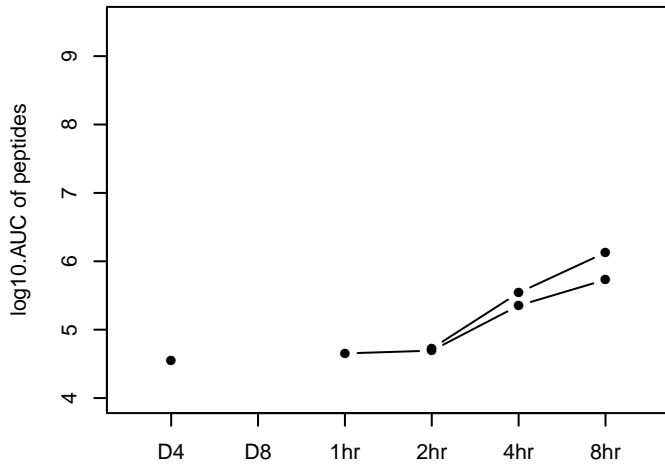

**TB182\_HUMAN**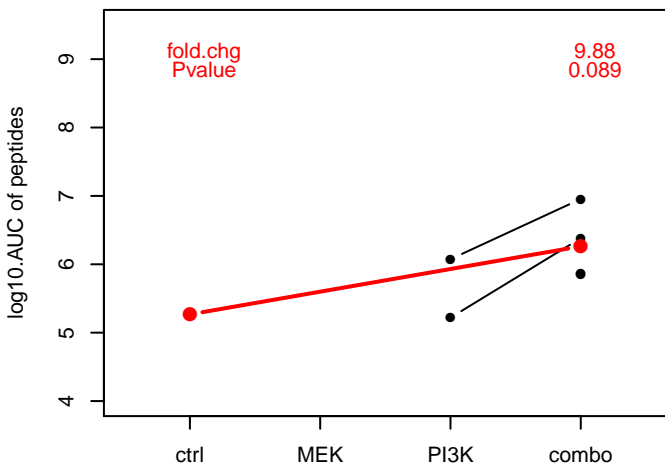**TB182\_HUMAN**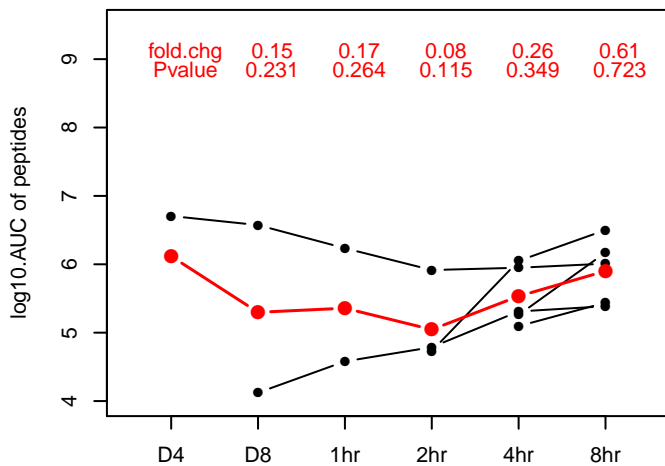**TBA1B\_HUMAN**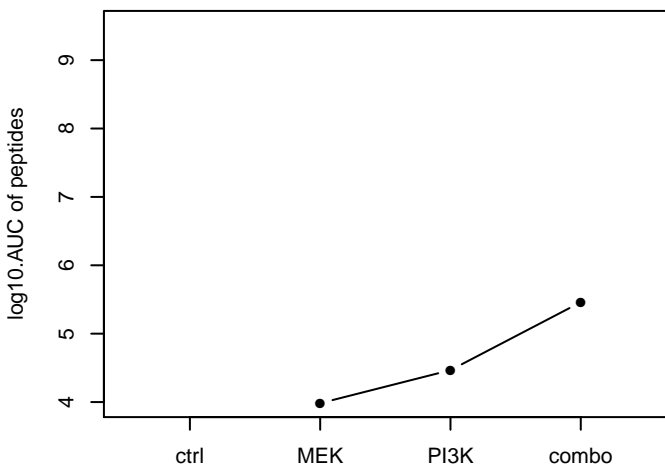**TBB1\_HUMAN**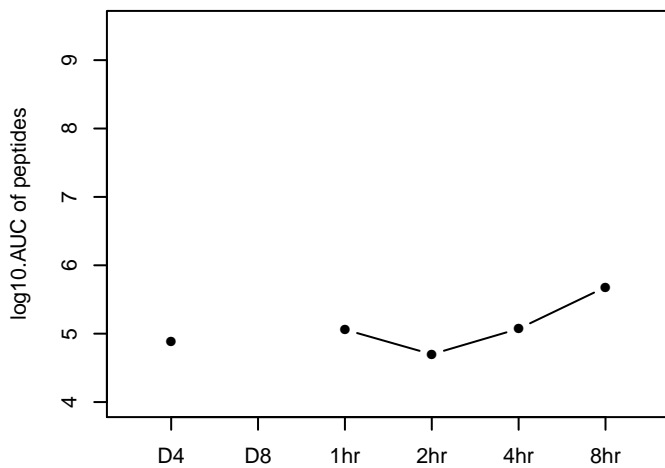

**TBB2A\_HUMAN**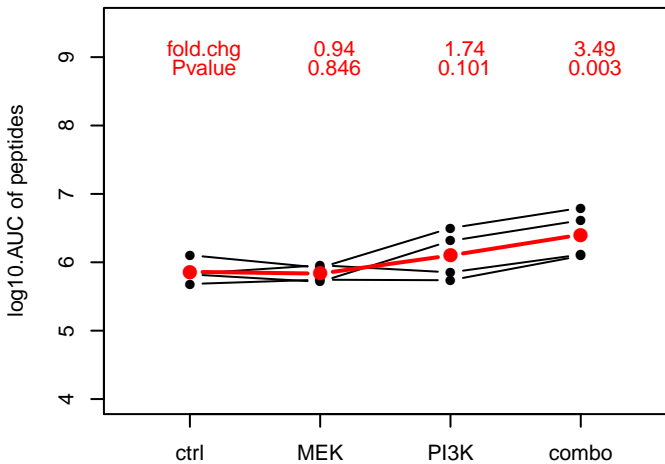**TBB2A\_HUMAN**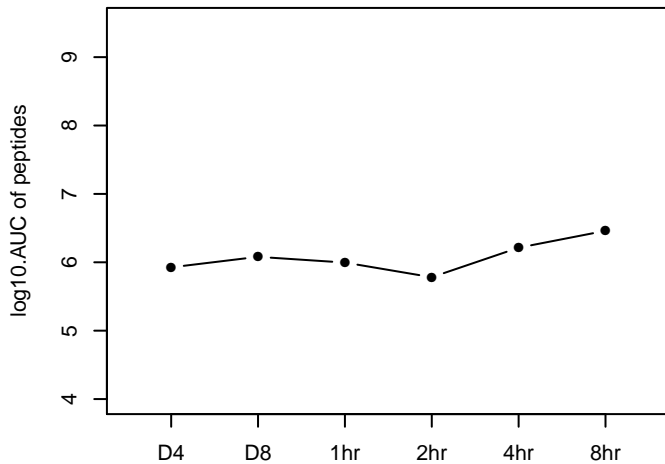**TBB3\_HUMAN**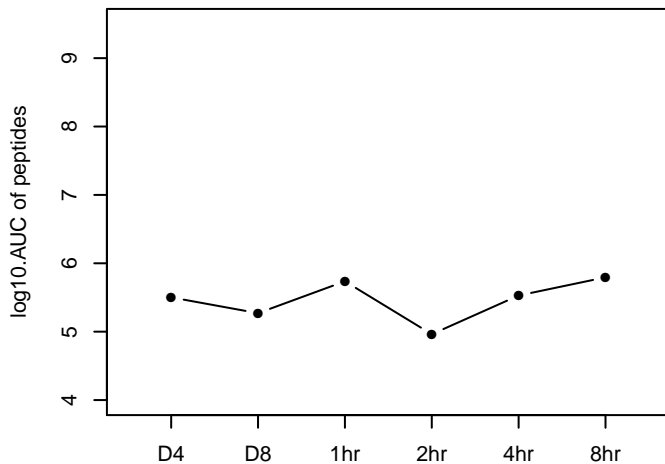**TBB5\_HUMAN**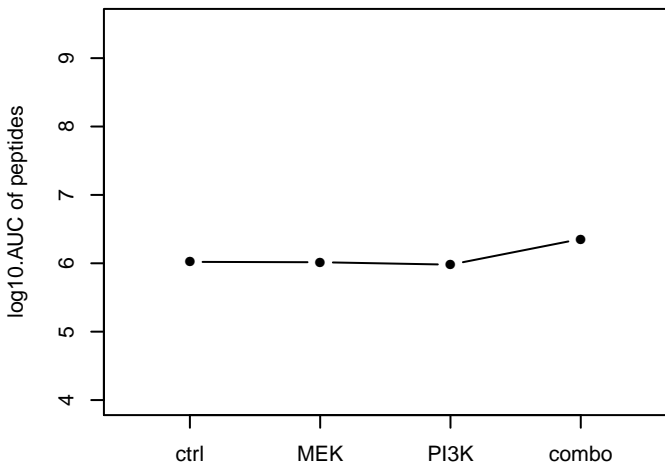**TBB5\_HUMAN**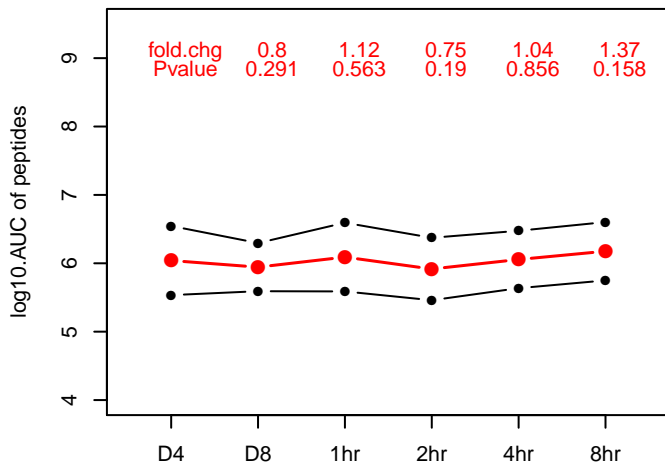

**TBCB\_HUMAN**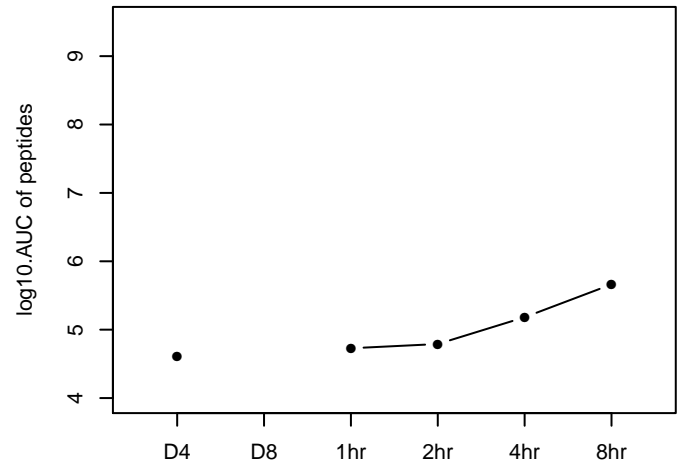**TBL1R\_HUMAN**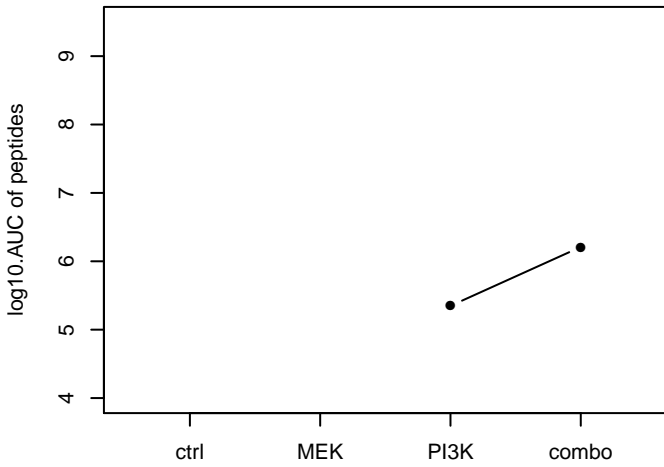**TBRG4\_HUMAN**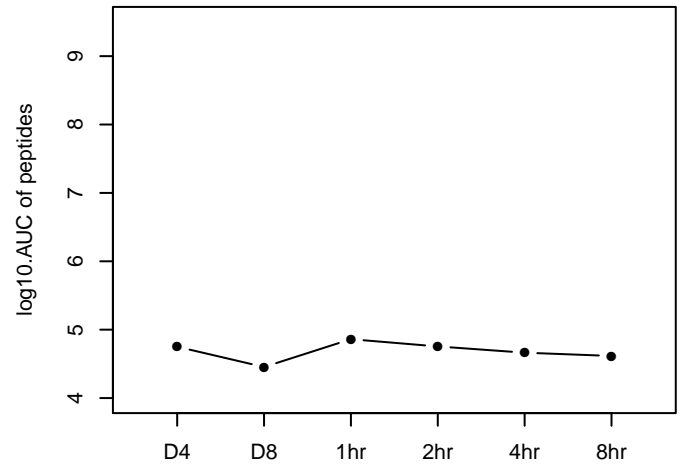

**TCAL3\_HUMAN**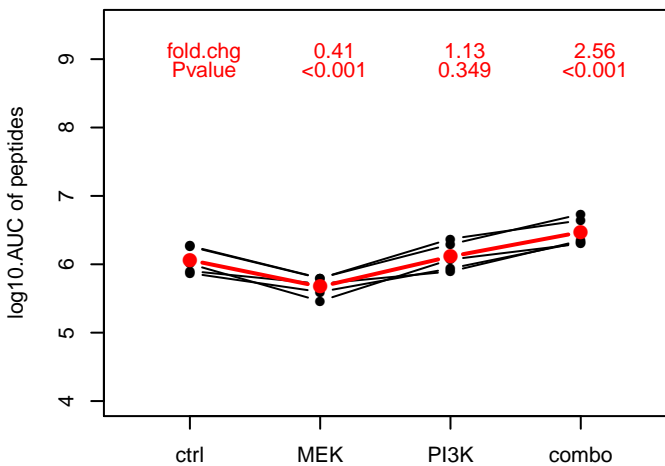**TCAL3\_HUMAN**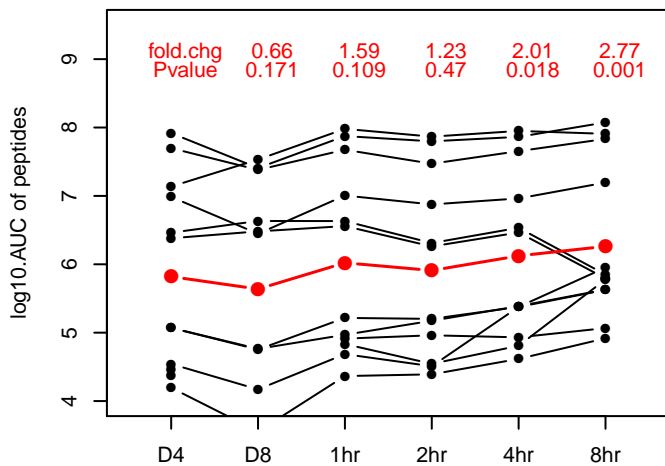**TCEA1\_HUMAN**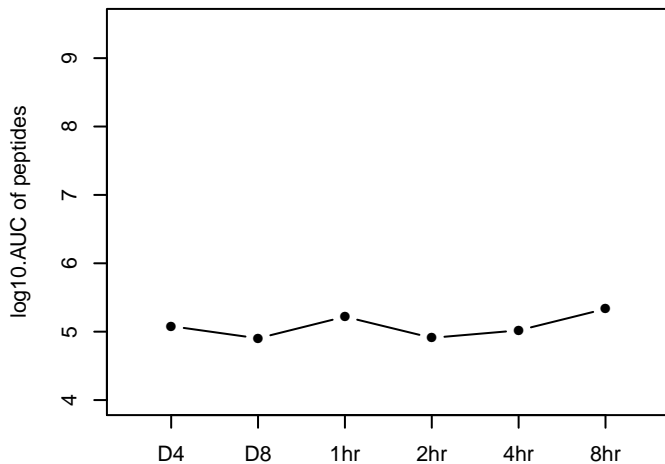**TCF20\_HUMAN**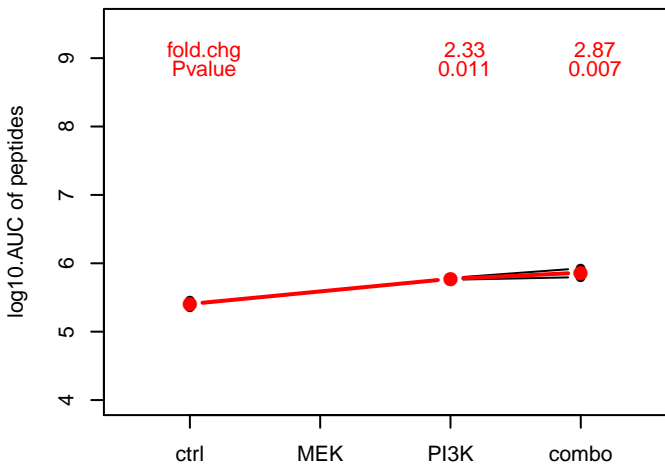**TCF20\_HUMAN**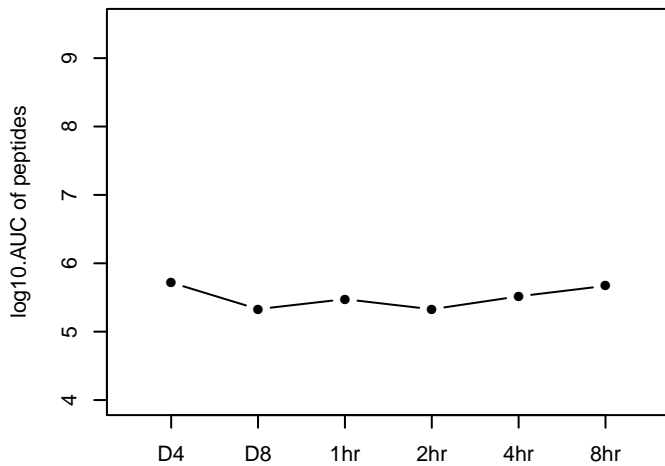

**TCOF\_HUMAN**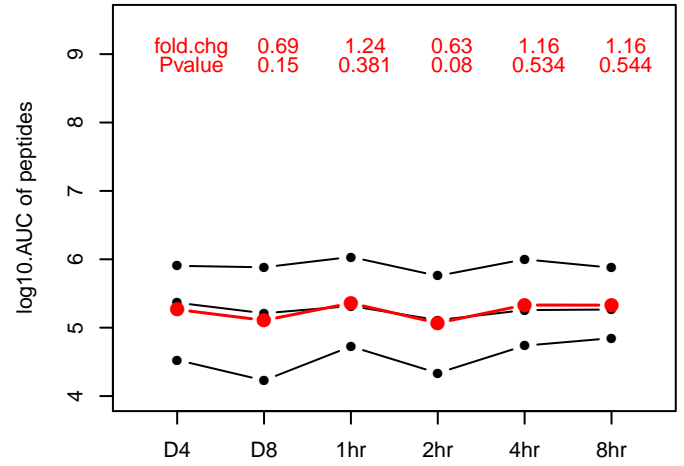**TCP4\_HUMAN**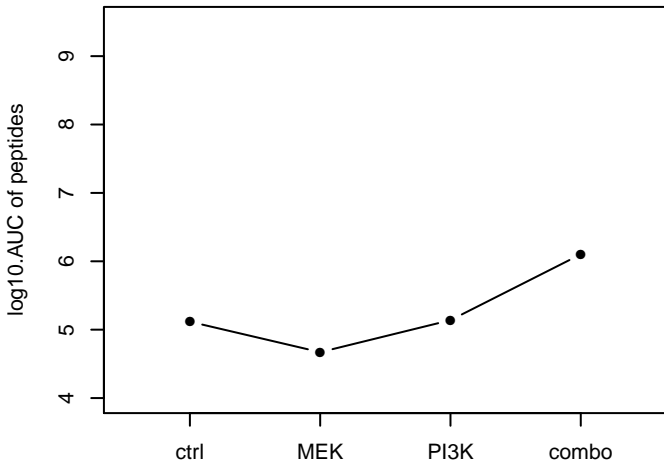**TCP4\_HUMAN**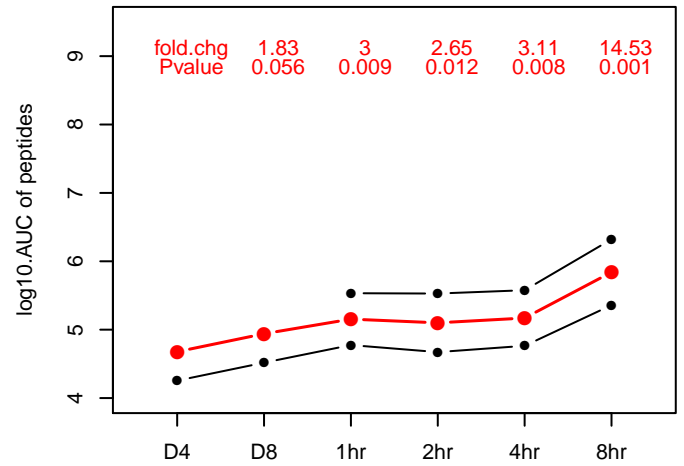**TCPA\_HUMAN**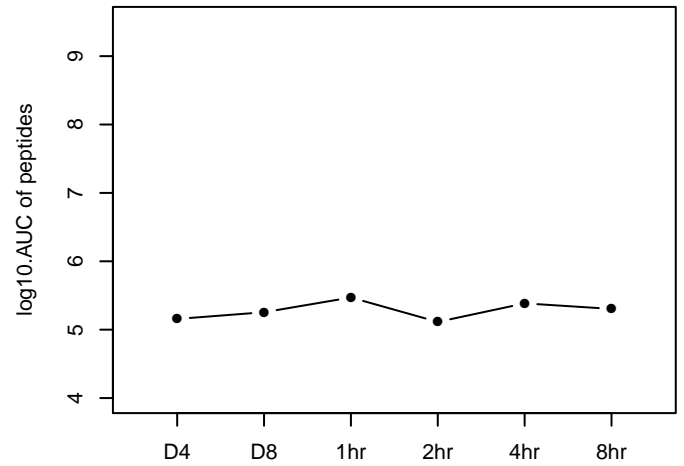

### TCPB\_HUMAN

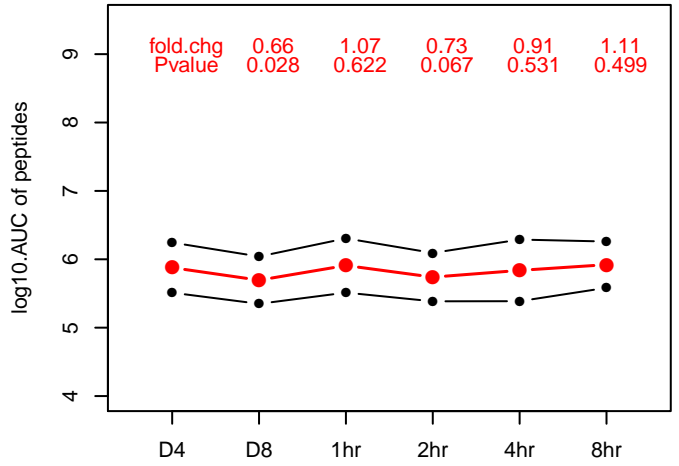

### TCPD\_HUMAN

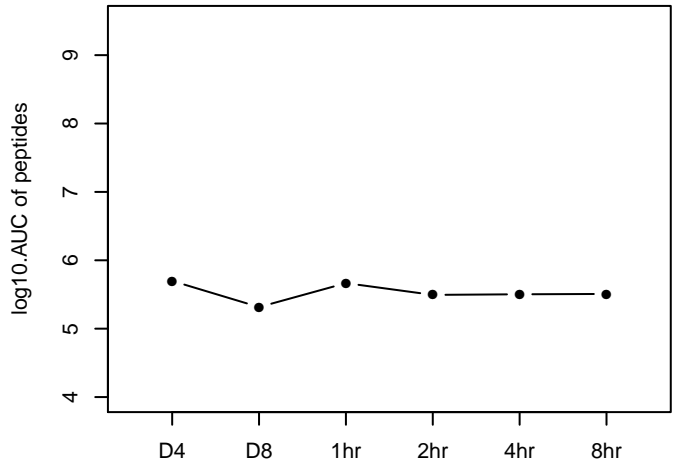

### TCPE\_HUMAN

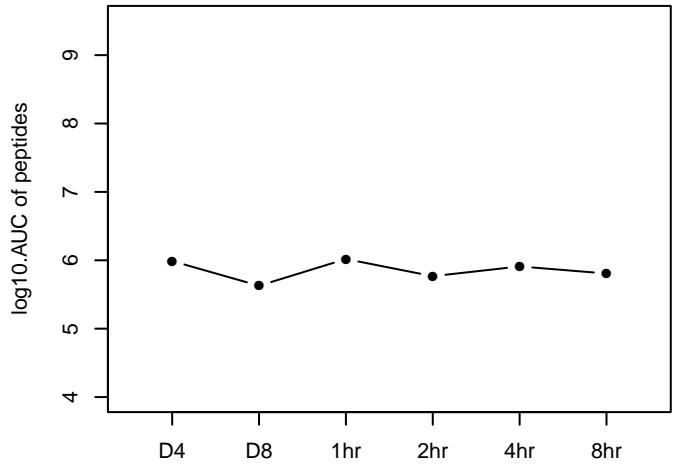



**TCPG\_HUMAN**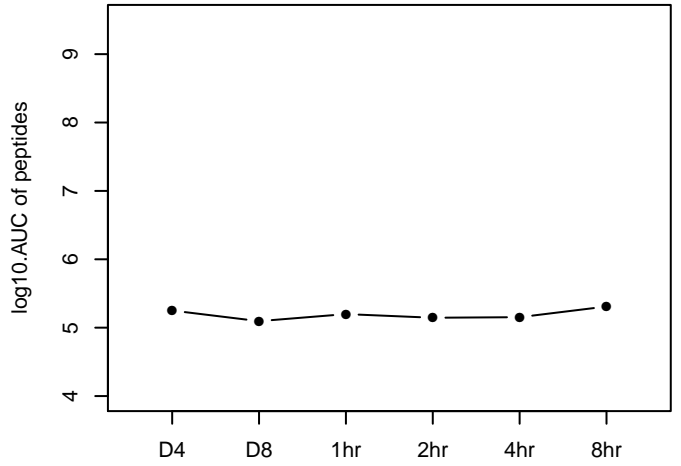**TCPH\_HUMAN**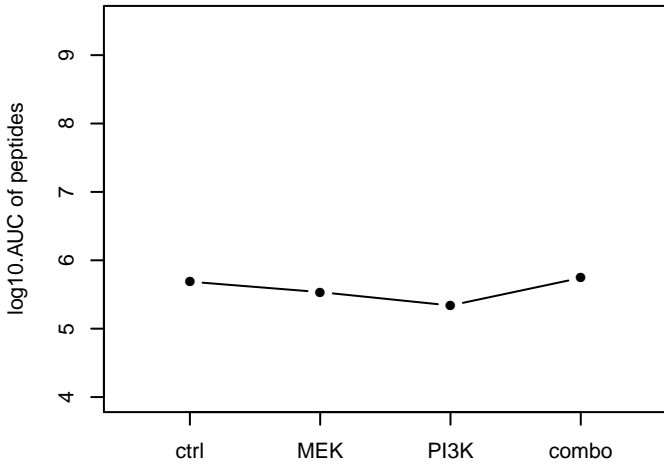**TCPH\_HUMAN**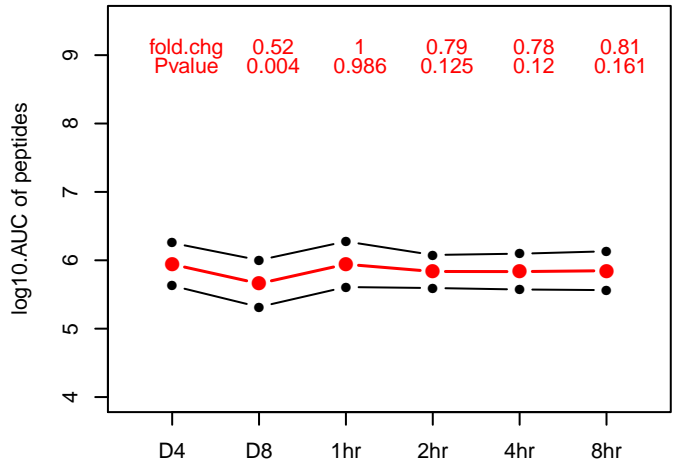**TDIF1\_HUMAN**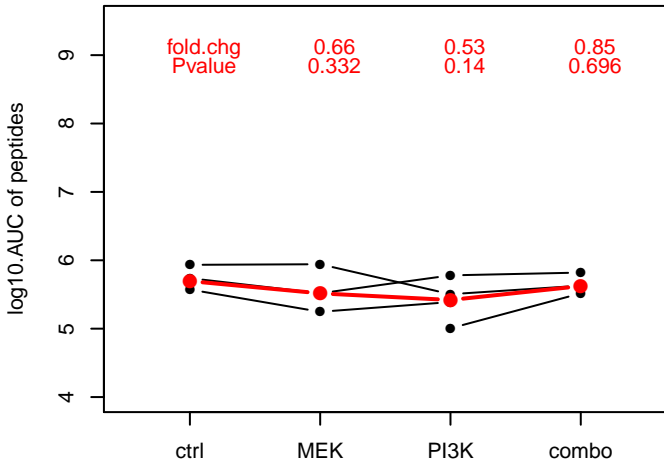**TDIF1\_HUMAN**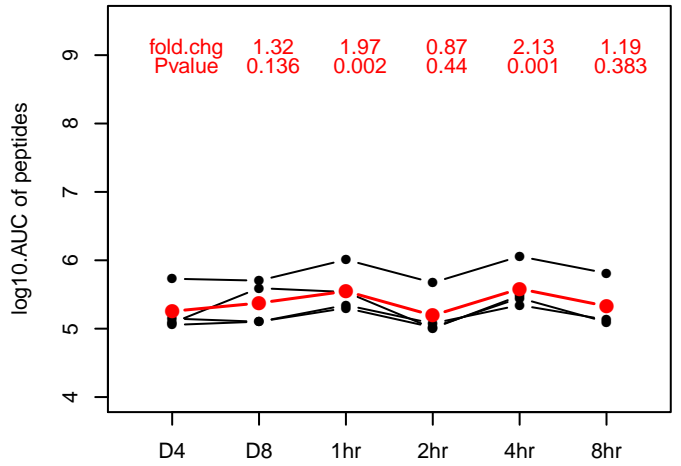

**TDIF2\_HUMAN**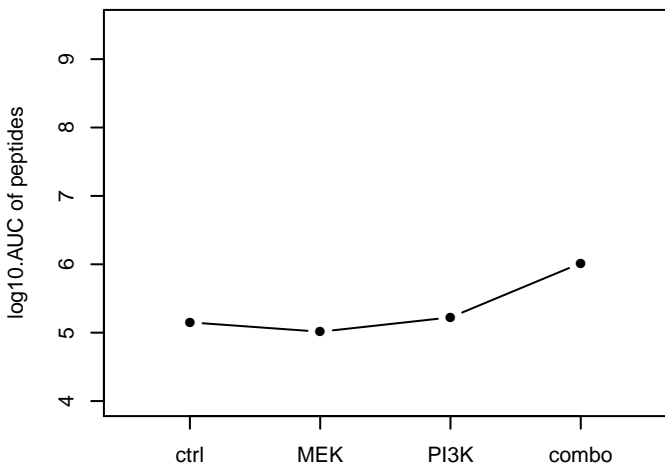**TDIF2\_HUMAN**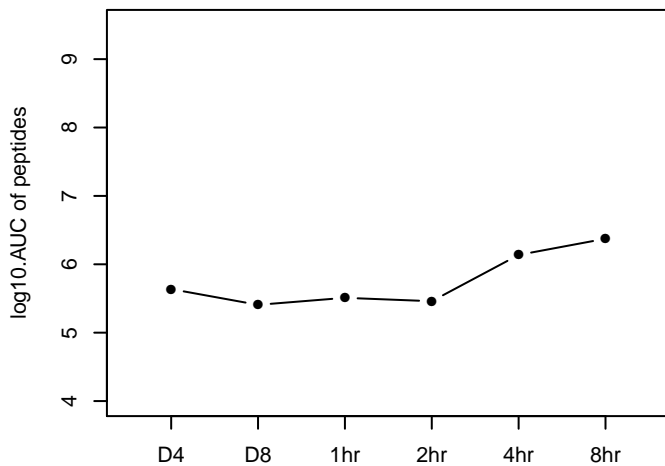**TDRD3\_HUMAN**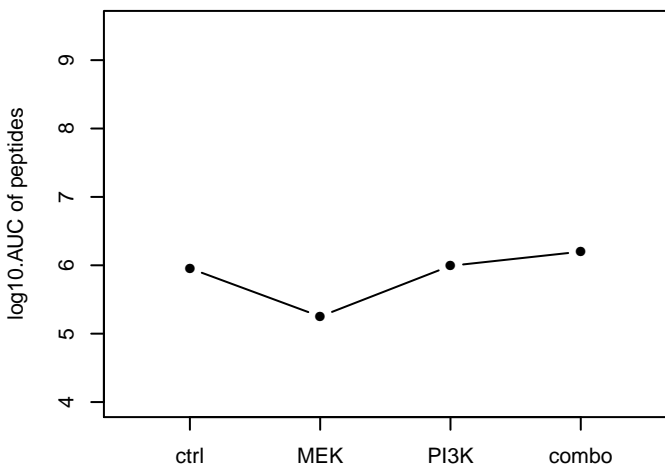**TDRD3\_HUMAN**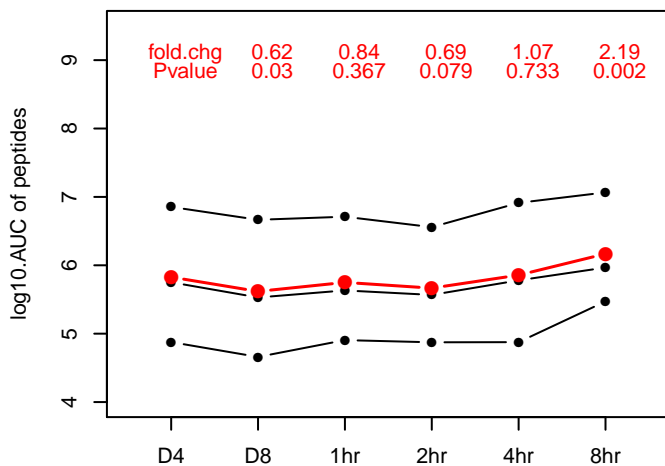**TE2IP\_HUMAN**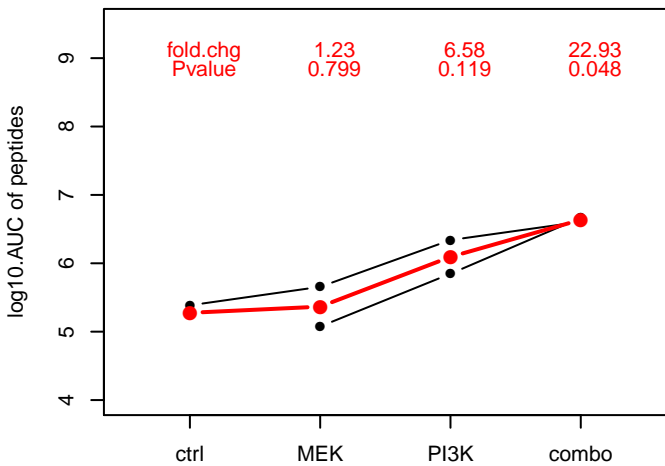**TE2IP\_HUMAN**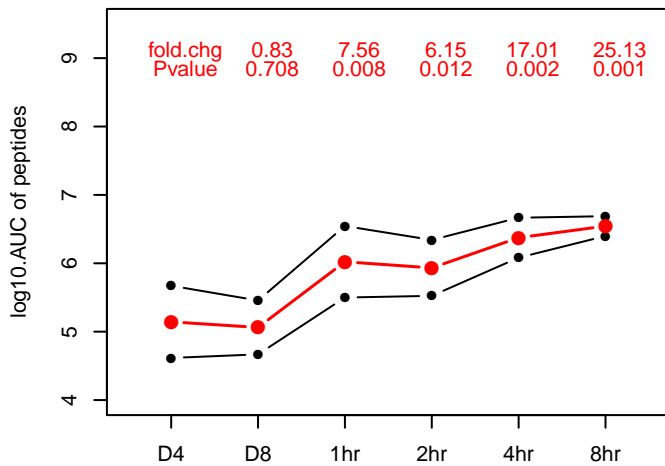

### TERA\_HUMAN

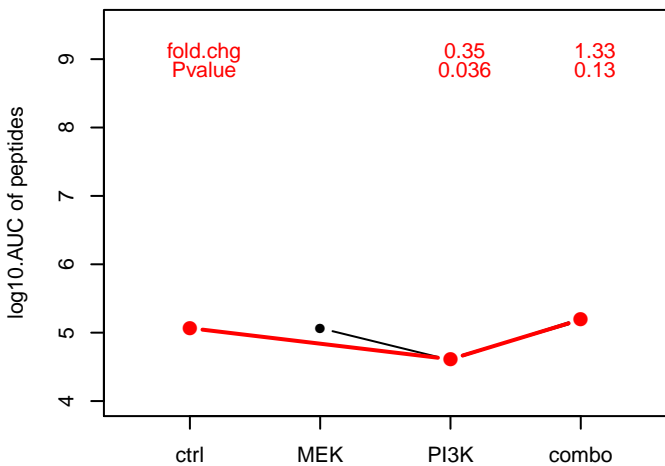

### TF3B\_HUMAN

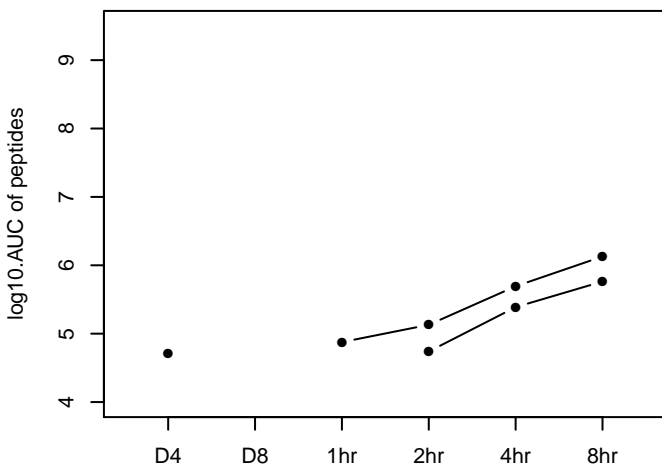

### TF3C1\_HUMAN

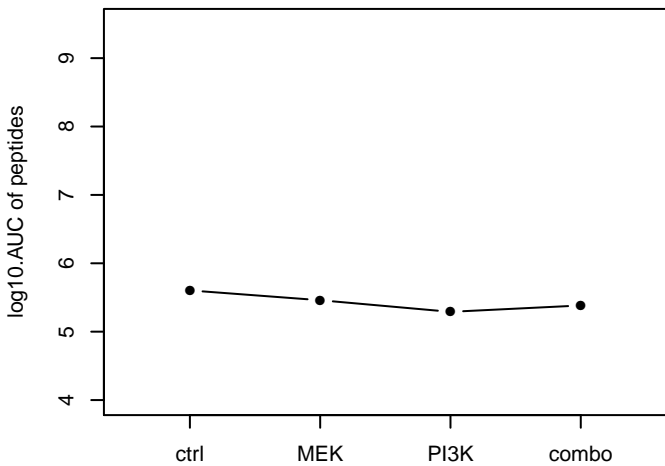

### TF3C1\_HUMAN

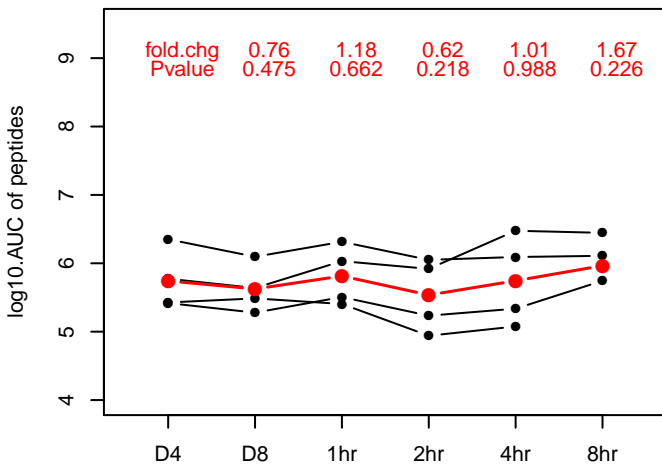

TFAM\_HUMAN

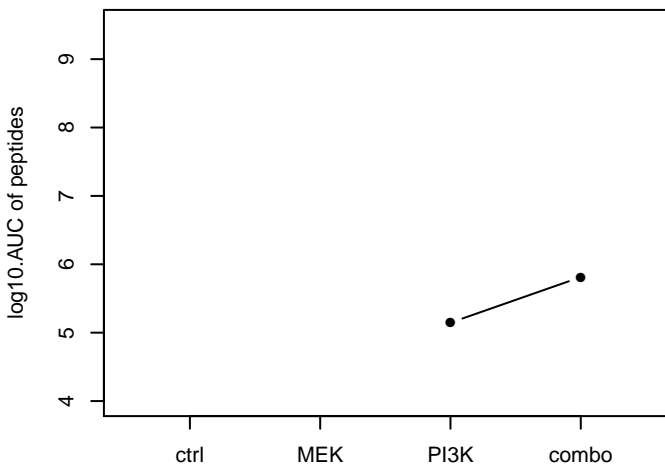

TFAM\_HUMAN

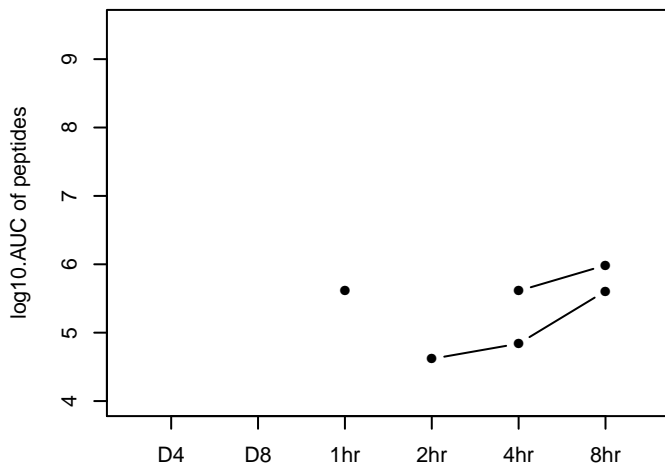

TFDP1\_HUMAN

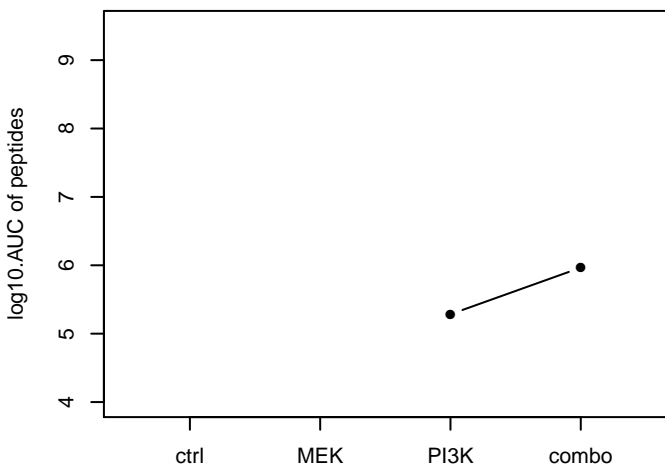

TFDP1\_HUMAN

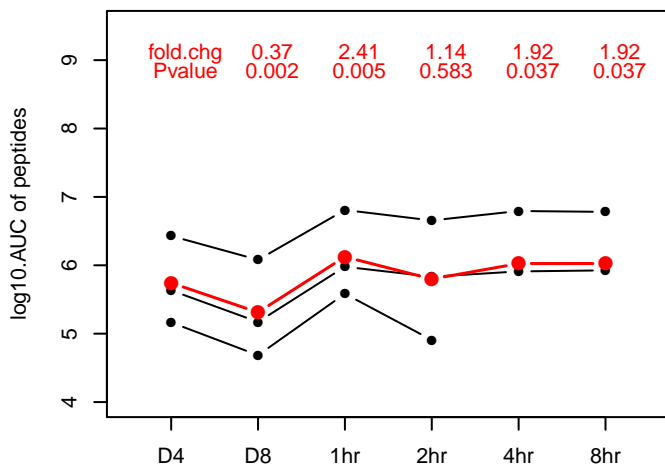

TFG\_HUMAN

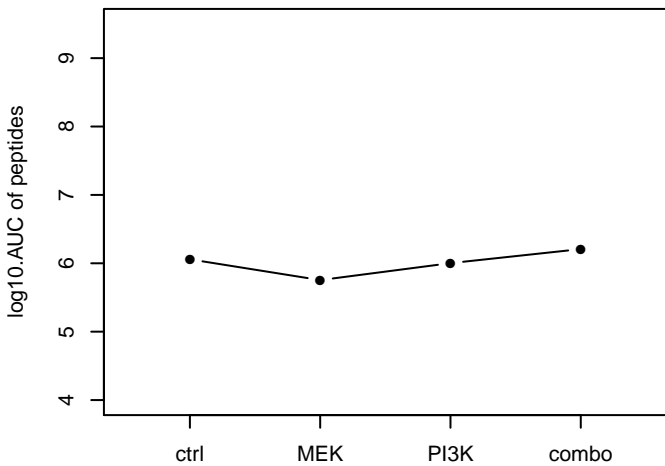

TFG\_HUMAN

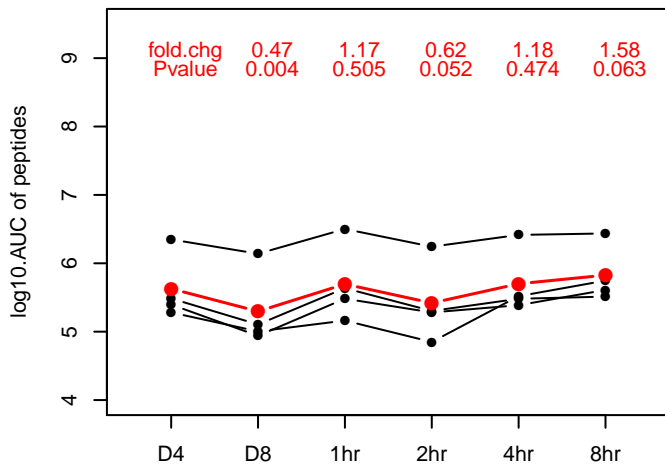

### TGS1\_HUMAN

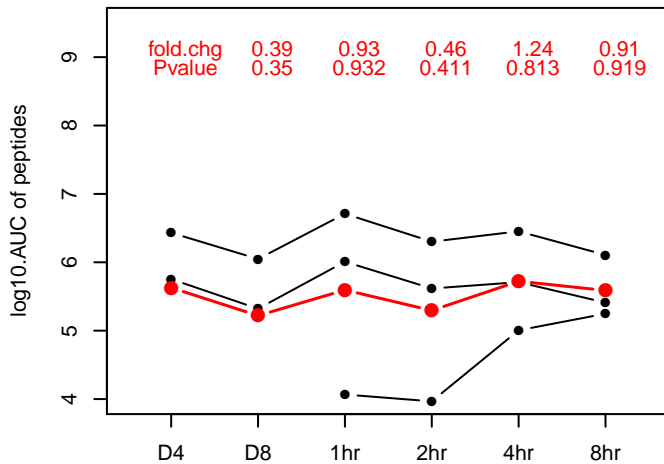

### THOC2\_HUMAN

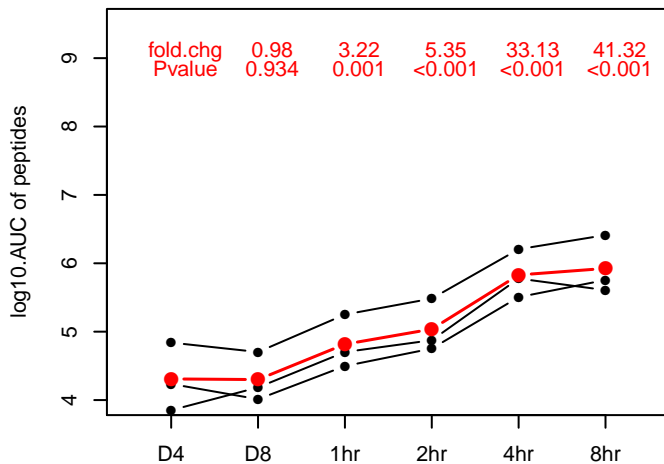

### TIF1A\_HUMAN

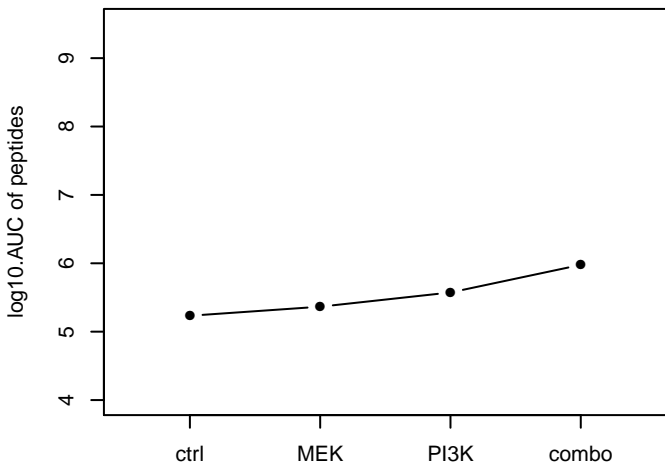

### TIF1A\_HUMAN

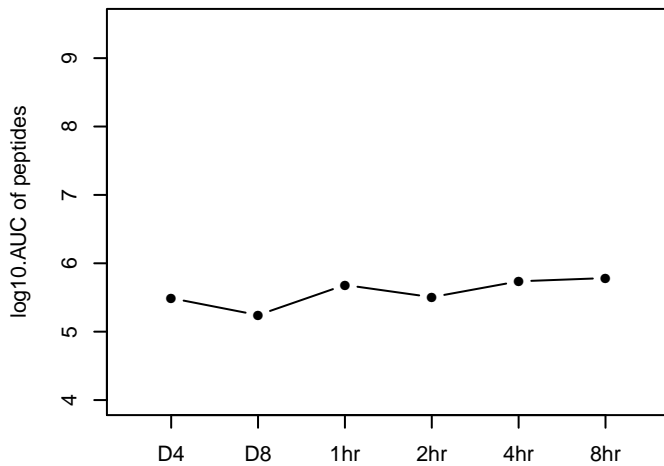

### TIF1B\_HUMAN

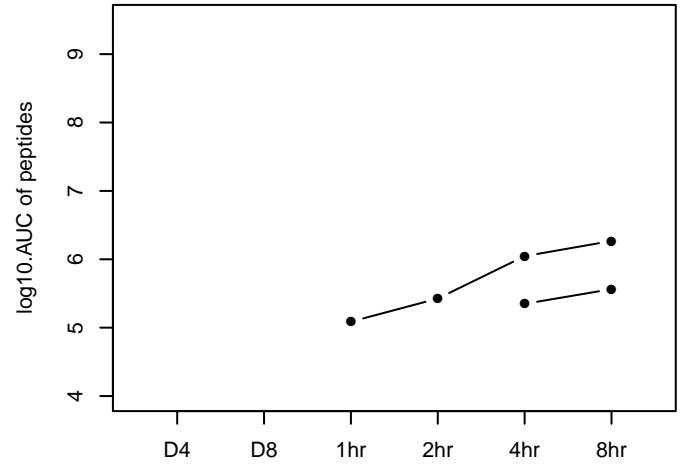

### TIPRL\_HUMAN

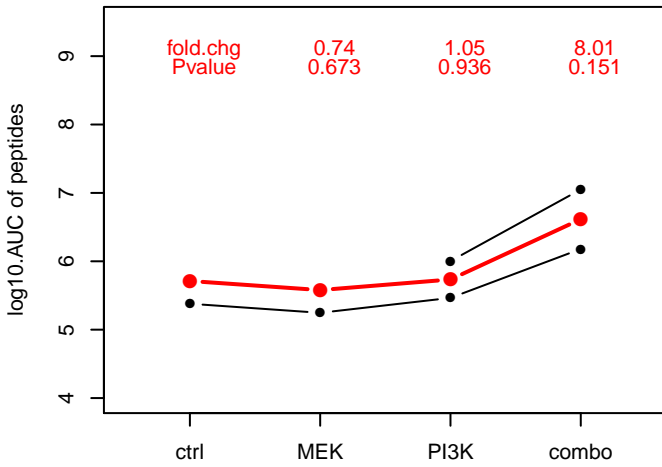

### TIPRL\_HUMAN

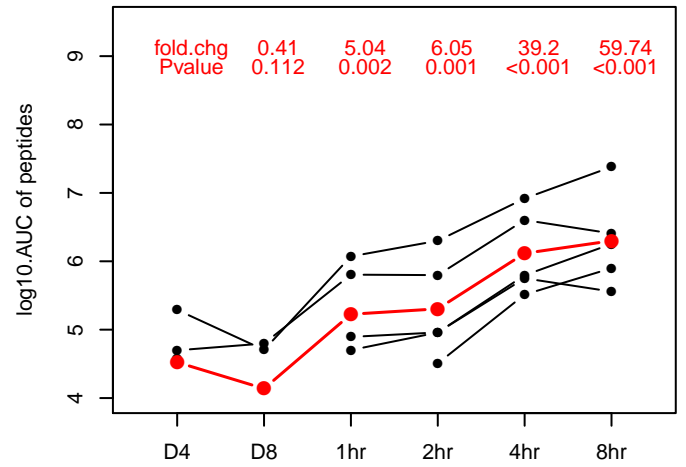

### TLN1\_HUMAN

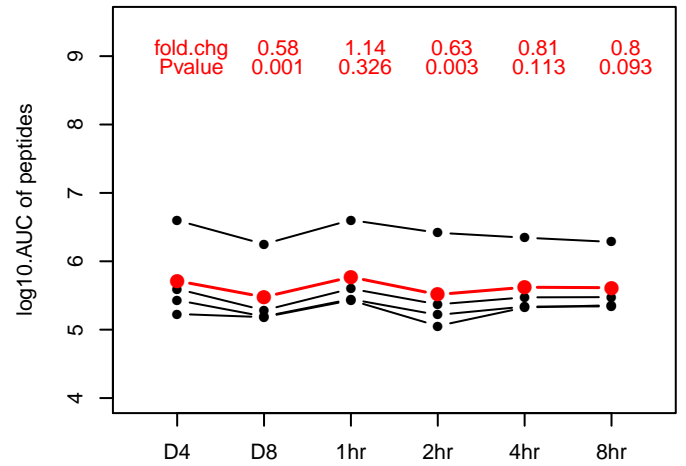

**TM100\_HUMAN**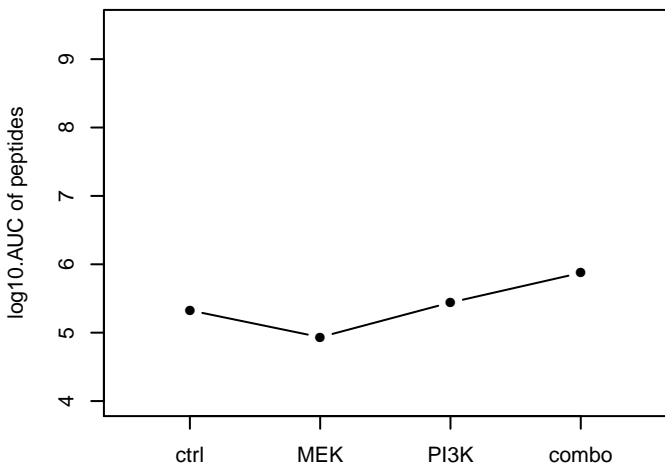**TM100\_HUMAN**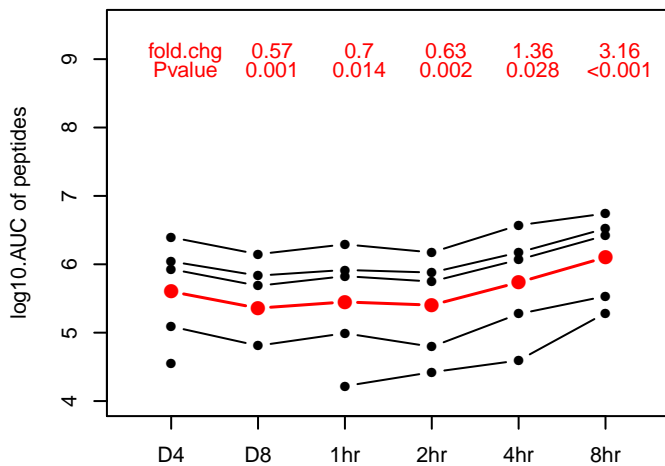**TM192\_HUMAN**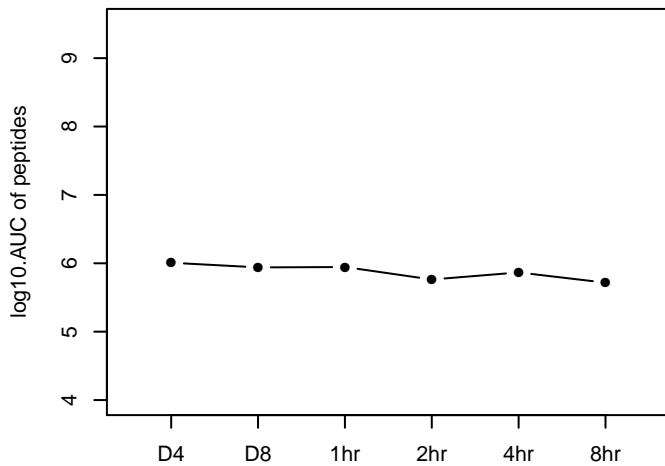**TM201\_HUMAN**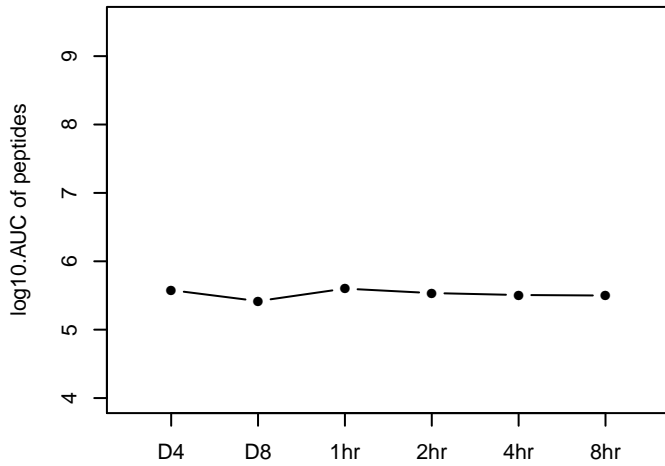

**TMC6\_HUMAN**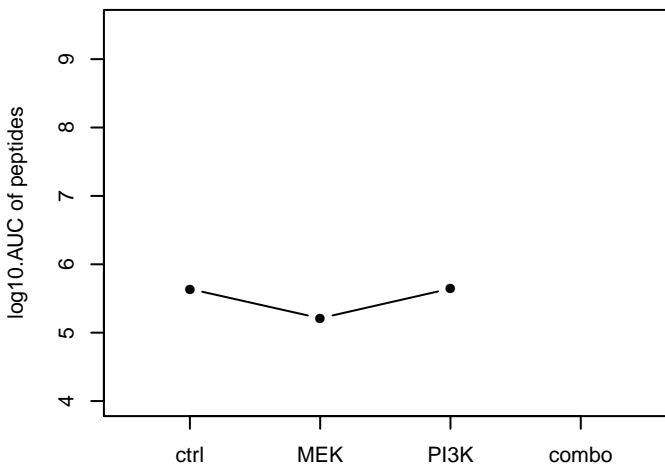**TMC6\_HUMAN**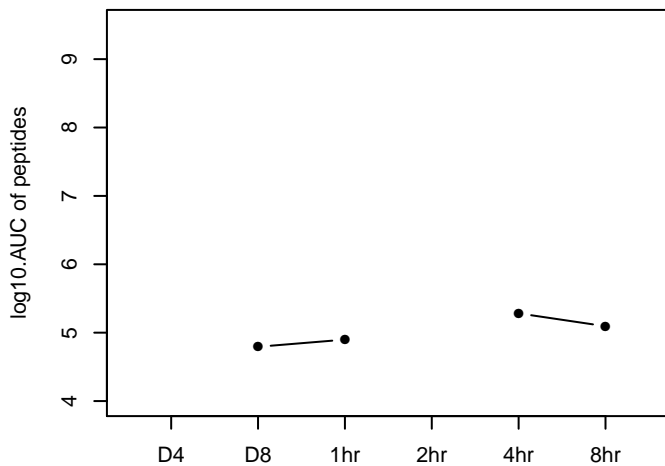**TMSL3\_HUMAN**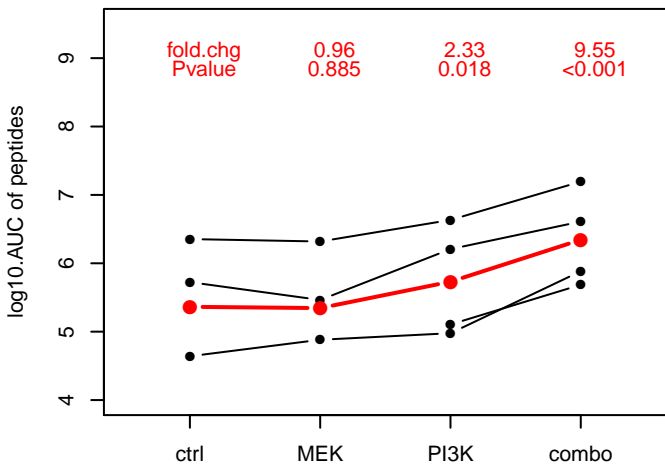**TMSL3\_HUMAN**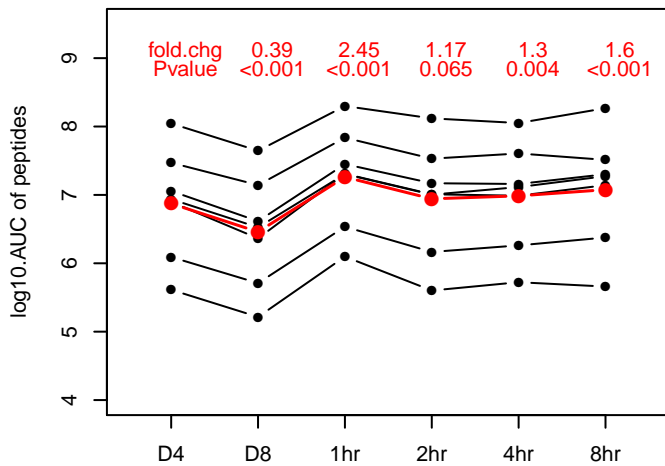**TNIP1\_HUMAN**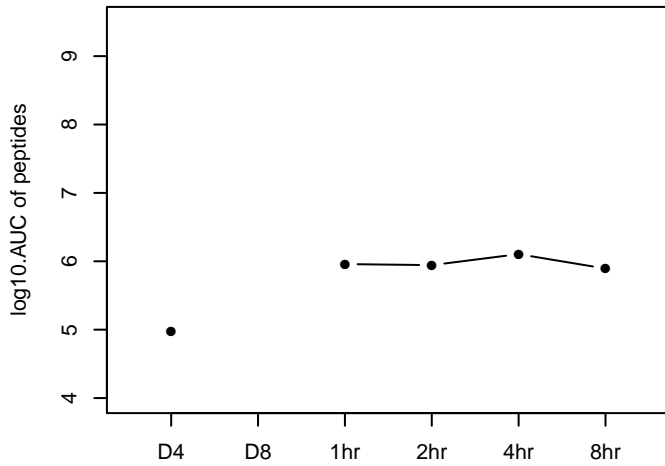



**TOE1\_HUMAN**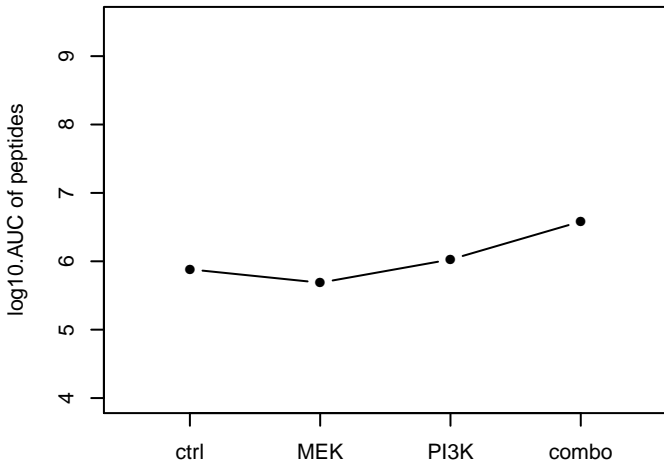**TOE1\_HUMAN**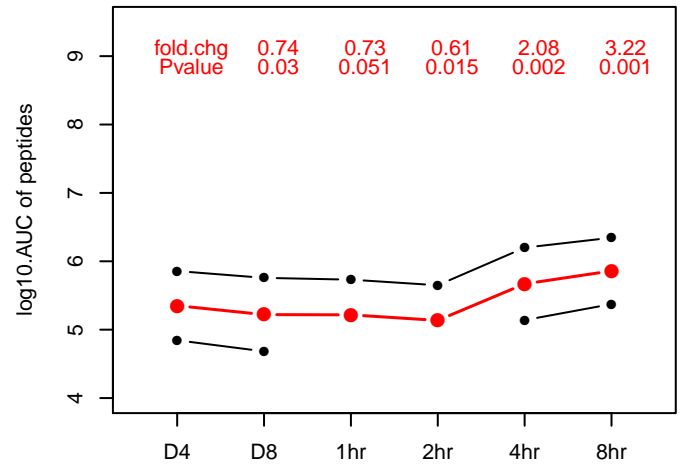**TOIP1\_HUMAN**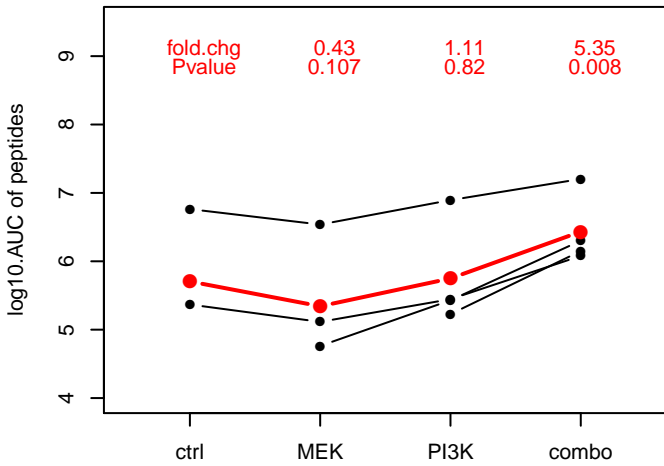**TOIP1\_HUMAN**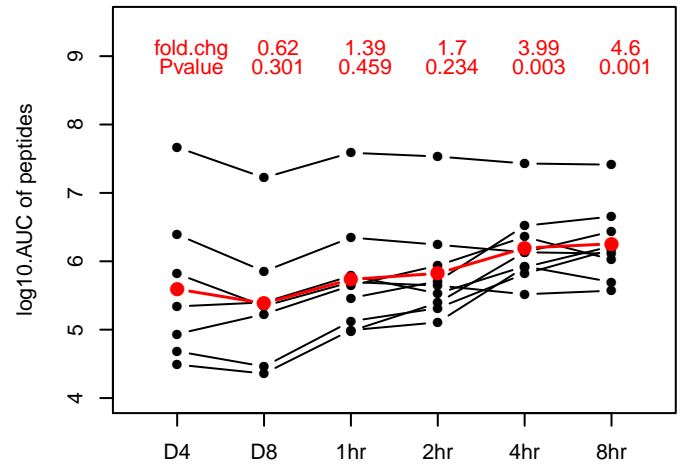**TOIP2\_HUMAN**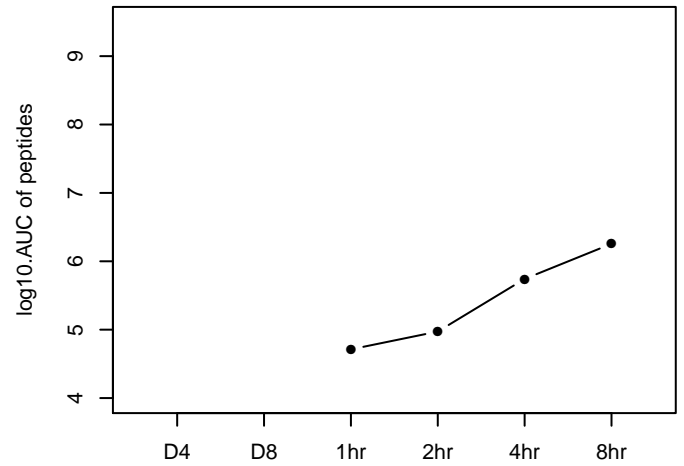

### TOP2B\_HUMAN

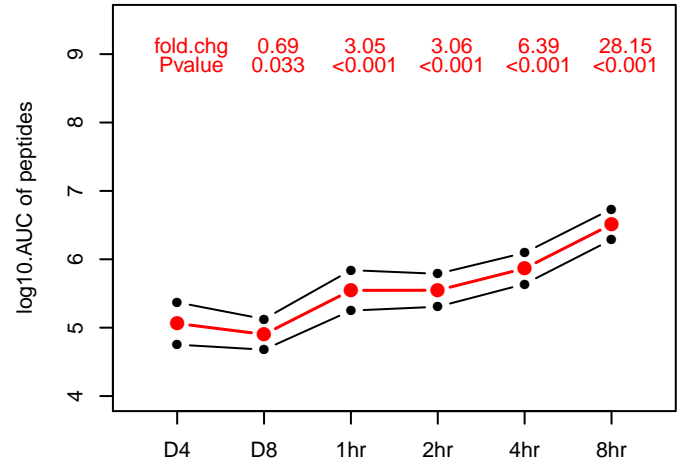

### TOPB1\_HUMAN

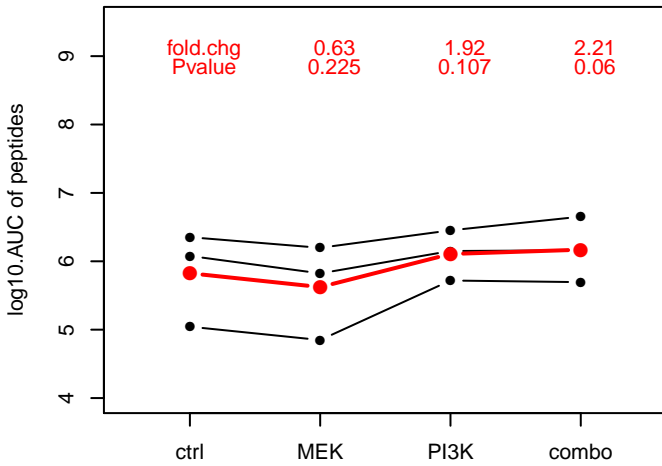

### TOPB1\_HUMAN

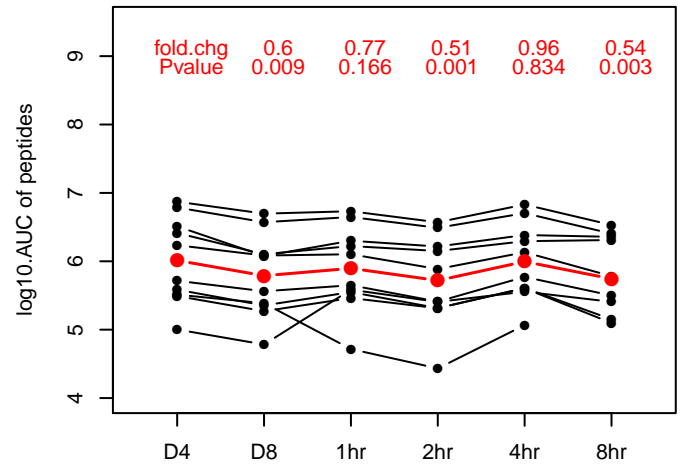

### TP53B\_HUMAN

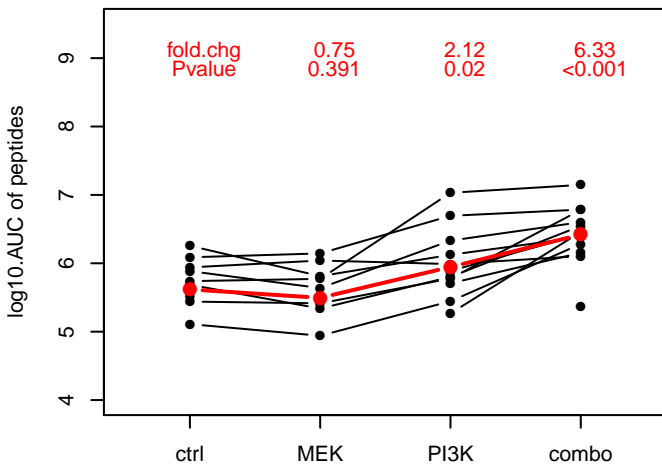

### TP53B\_HUMAN

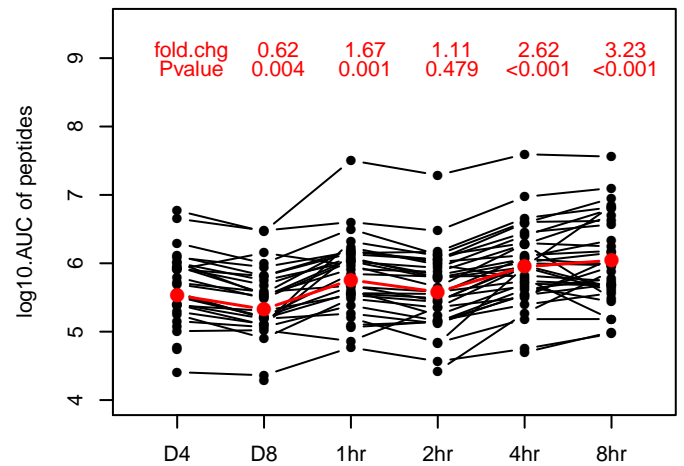

TPC11\_HUMAN

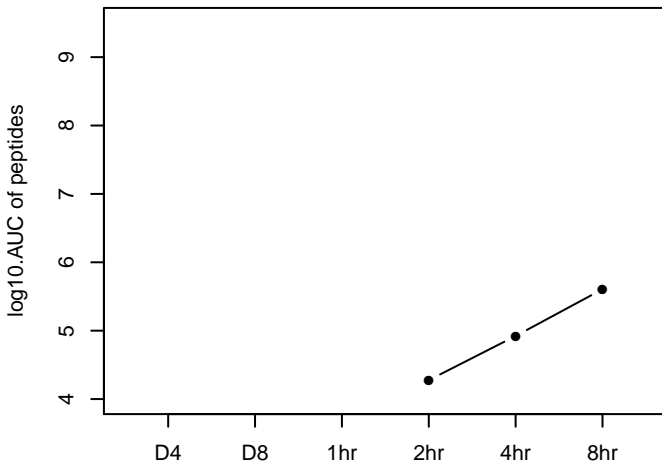

TPD52\_HUMAN

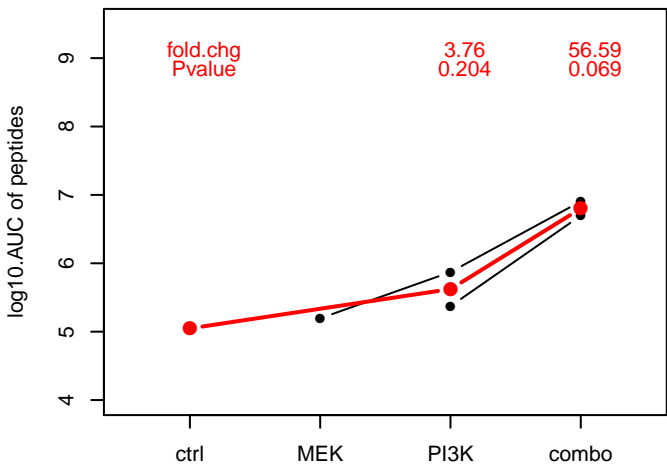

TPD52\_HUMAN

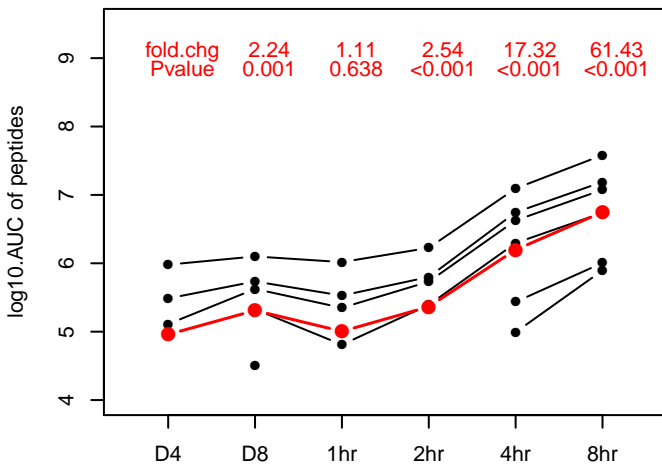

TPD54\_HUMAN

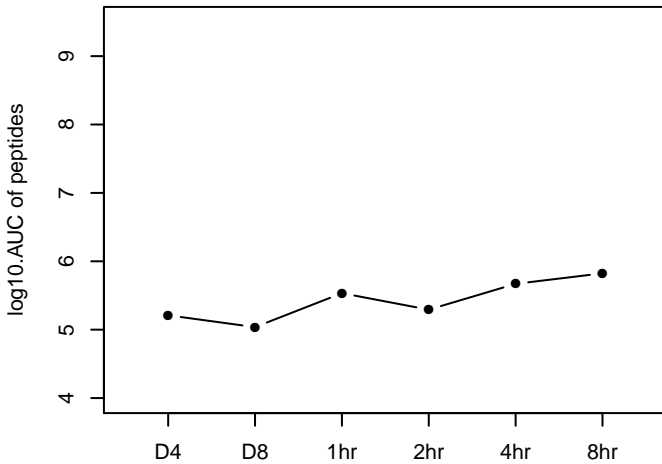

**TPM1\_HUMAN**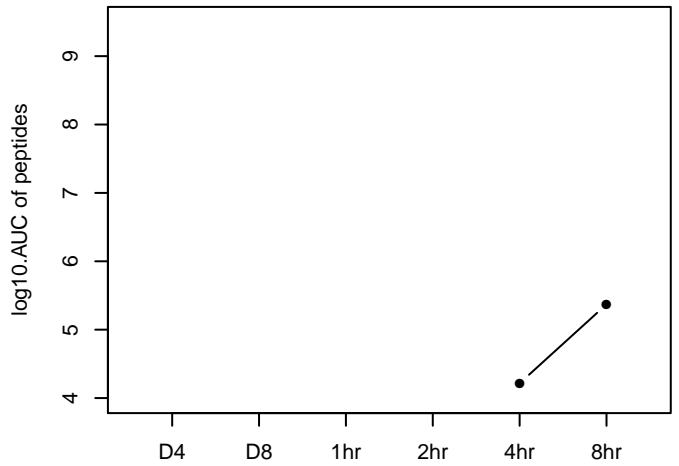**TPR\_HUMAN**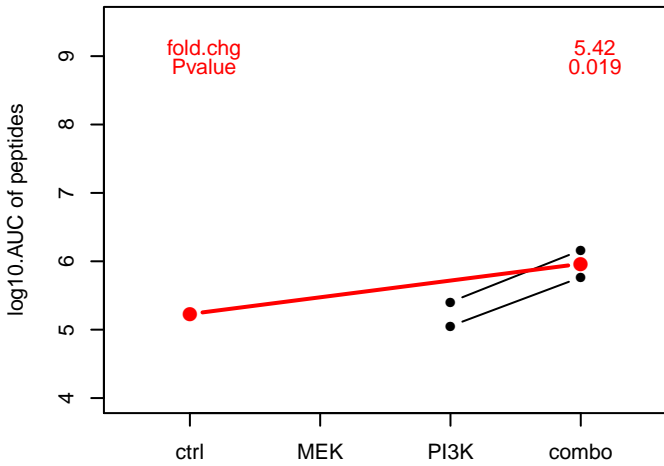**TPR\_HUMAN**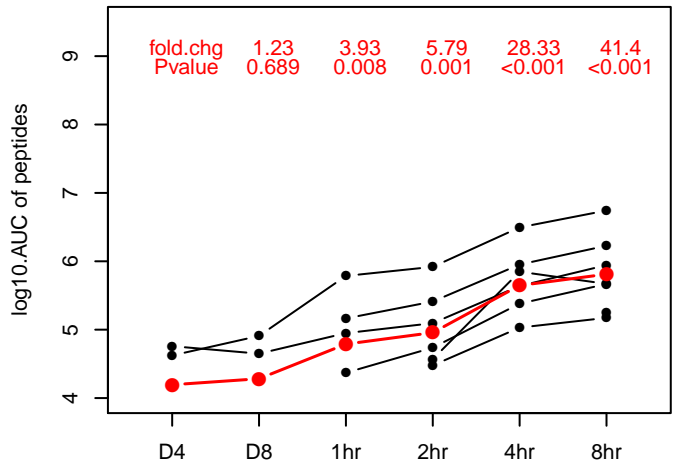**TR150\_HUMAN**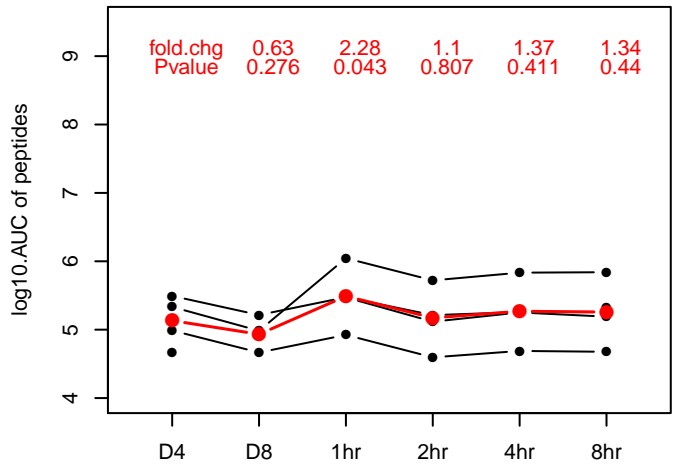

### TRI18\_HUMAN

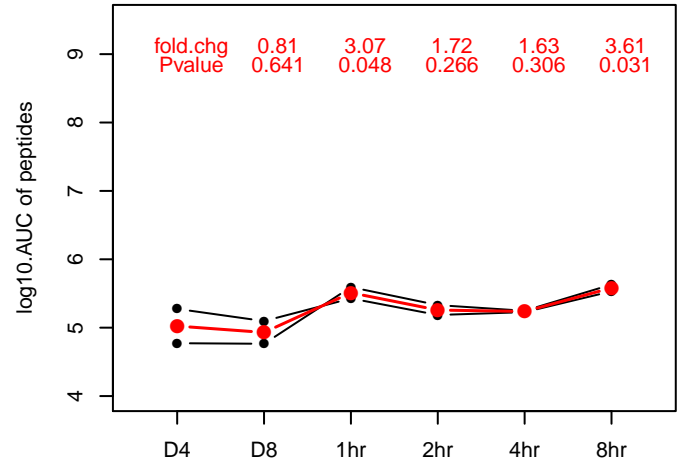

### TRI25\_HUMAN

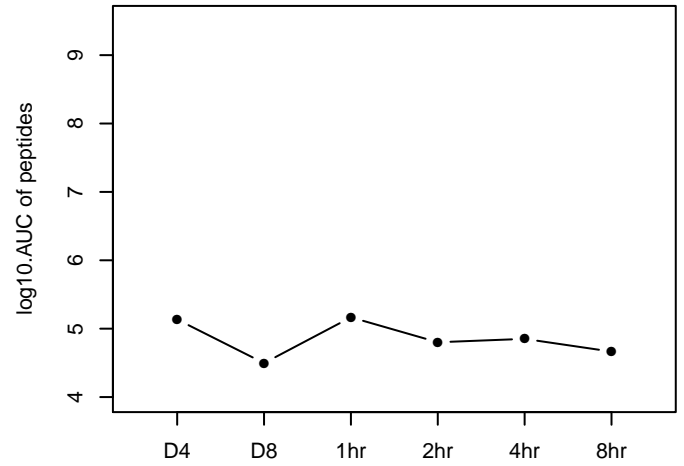

### TRI33\_HUMAN

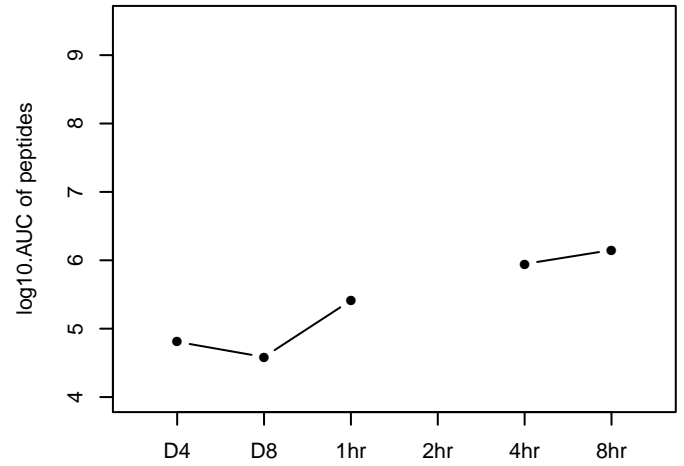

**TRIP6\_HUMAN**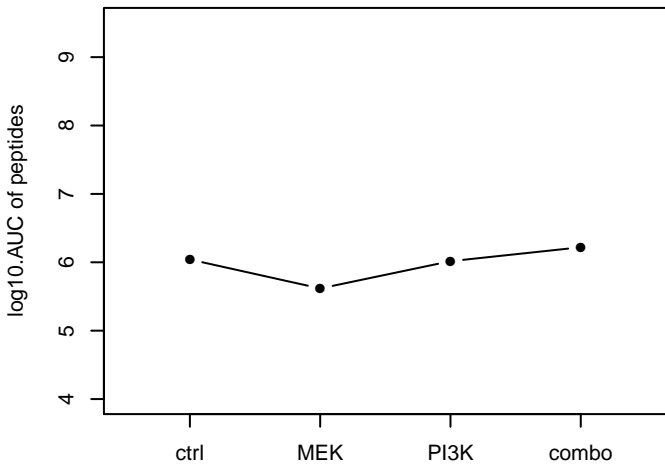**TRIP6\_HUMAN**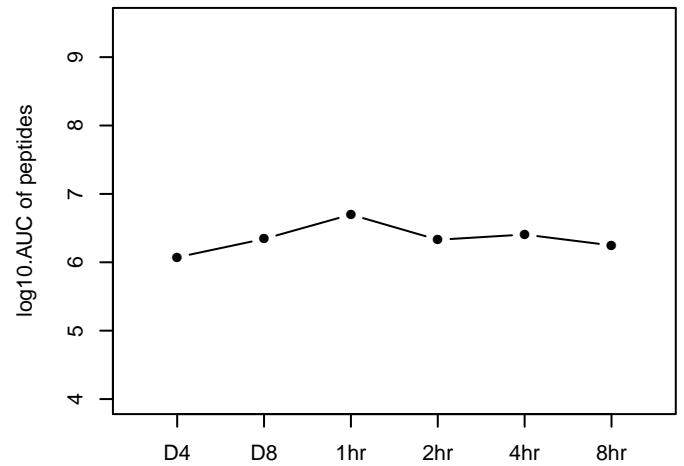**TRIPC\_HUMAN**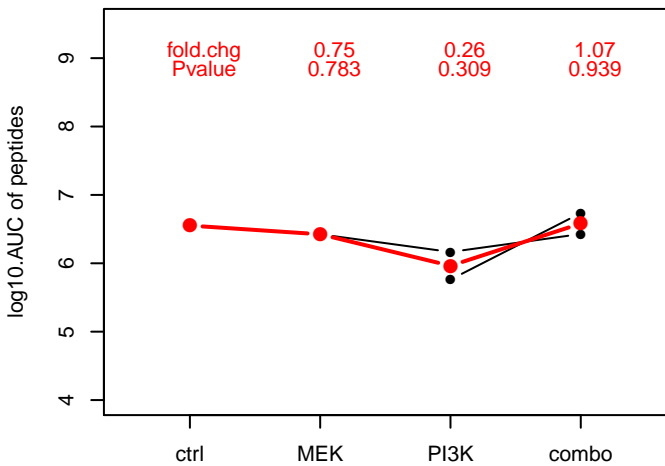**TRIPC\_HUMAN**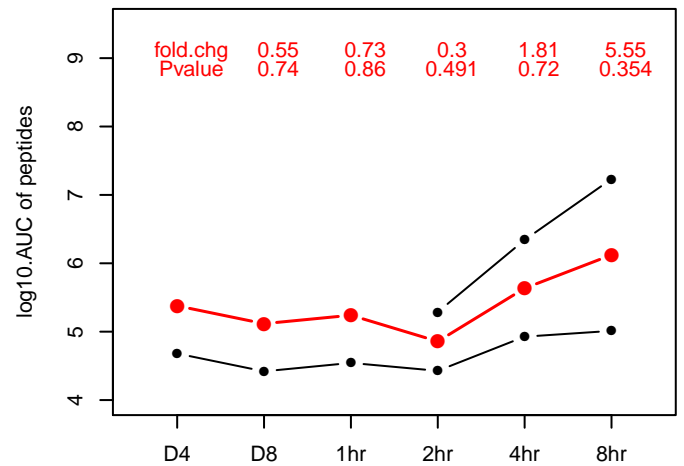**TRM6\_HUMAN**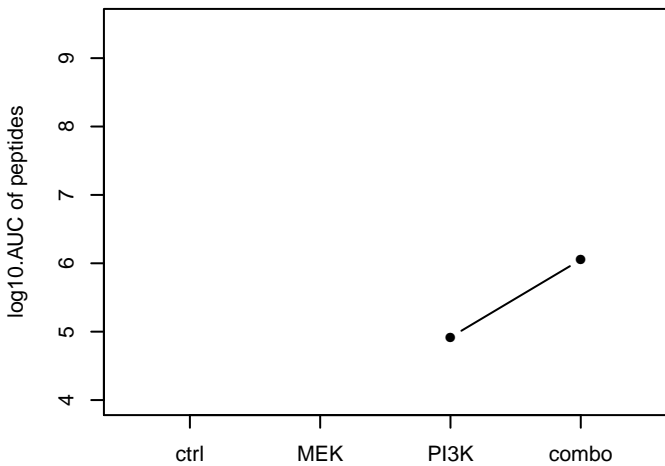**TRM6\_HUMAN**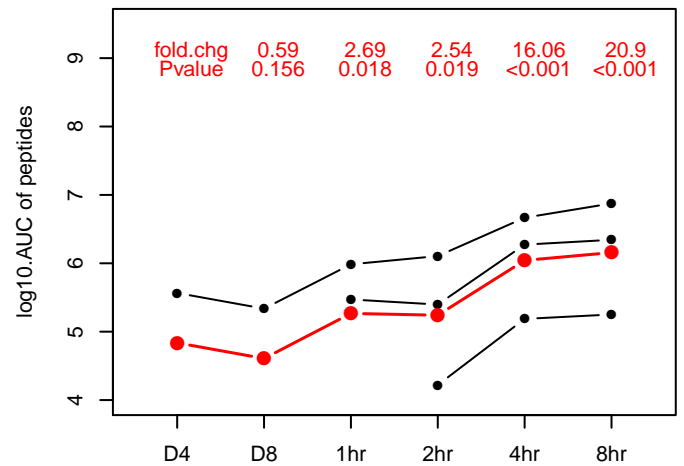

**TRMB\_HUMAN**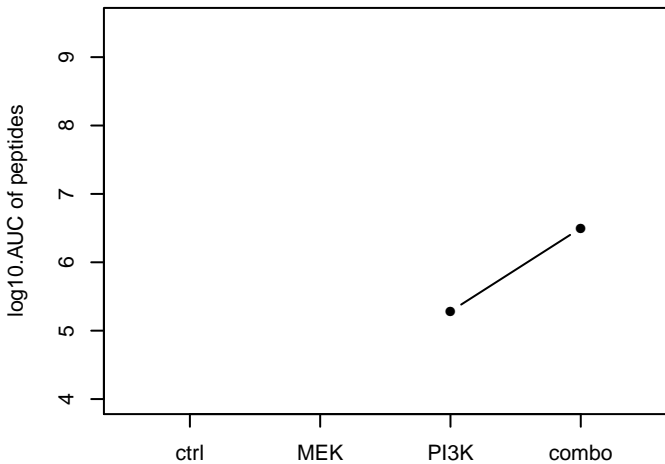**TRMB\_HUMAN**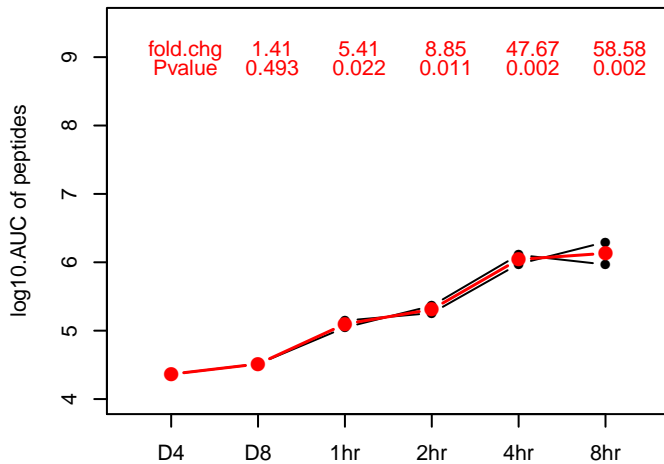**TRY1\_BOVINC**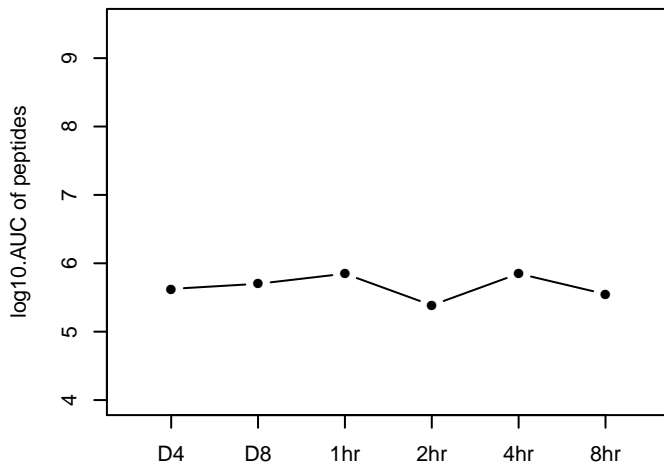**TSPY1\_HUMAN**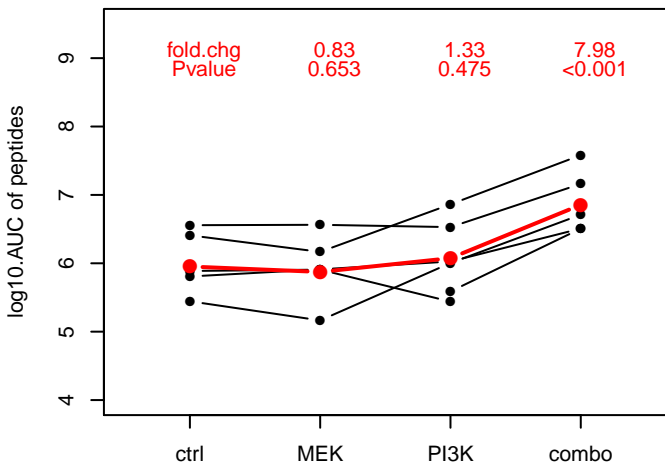**TSPY1\_HUMAN**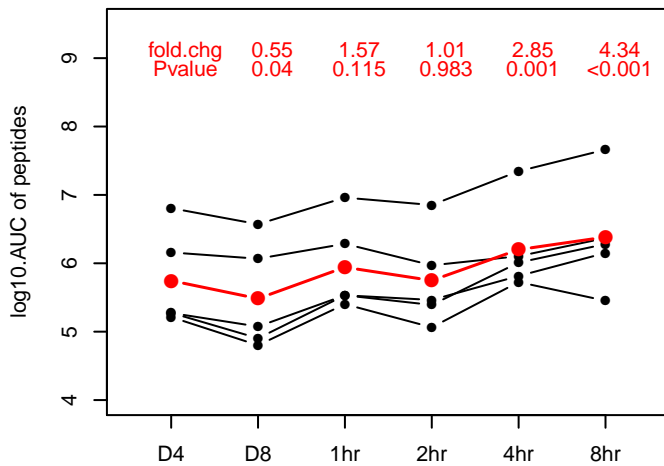

**TSR1\_HUMAN**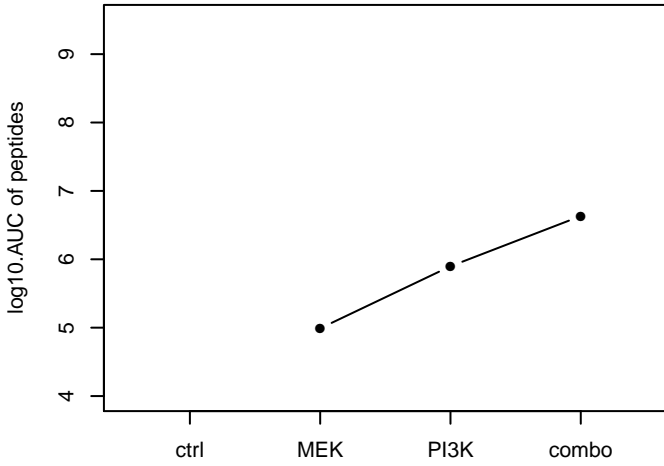**TSR1\_HUMAN**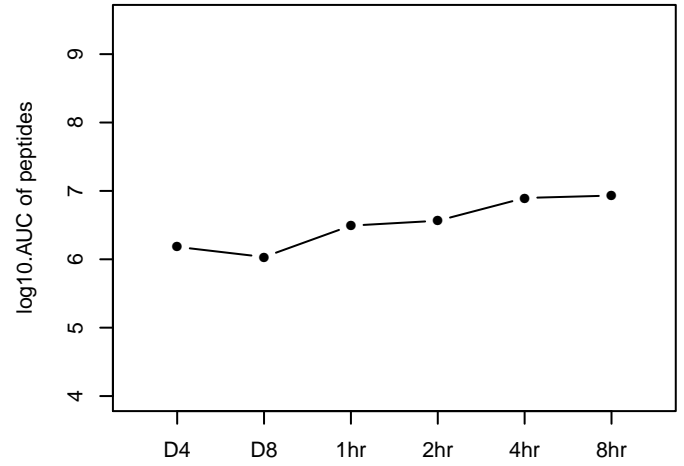**TTC1\_HUMAN**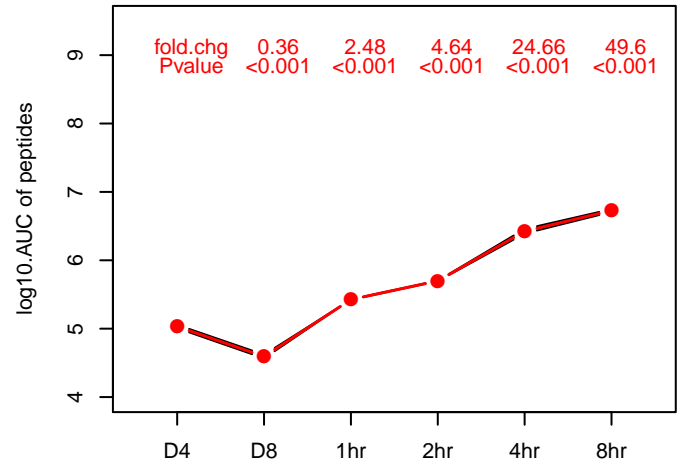**TTF1\_HUMAN**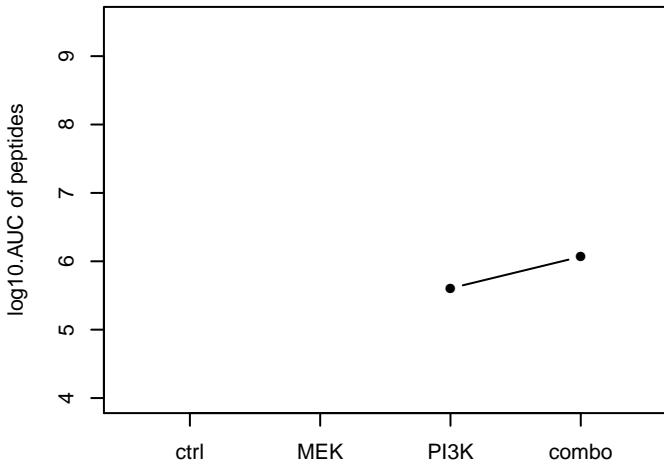**TTF1\_HUMAN**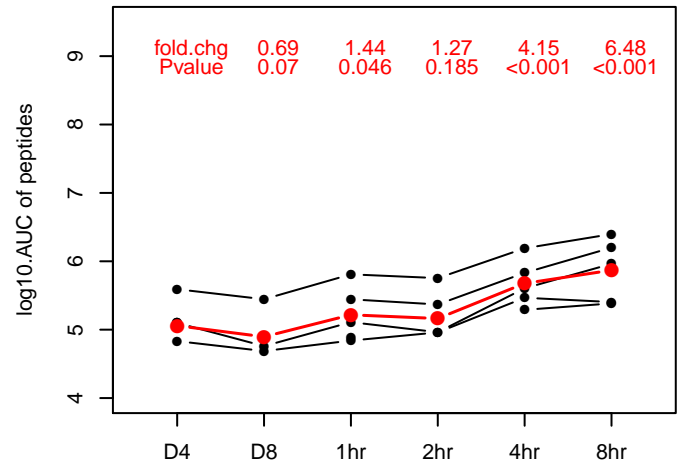



### TTF2\_HUMAN

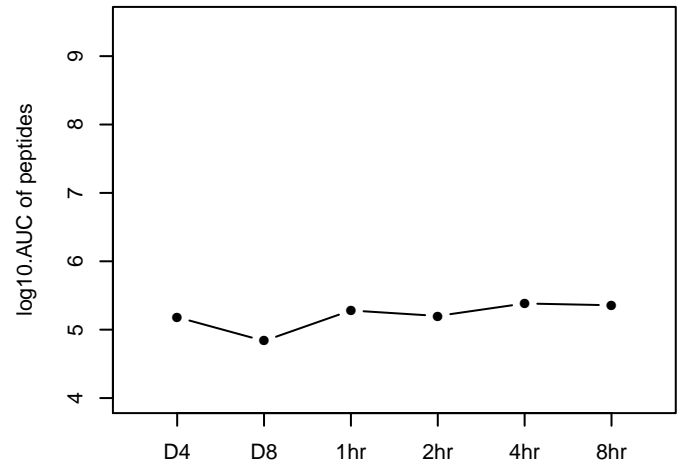

### TXLNA\_HUMAN

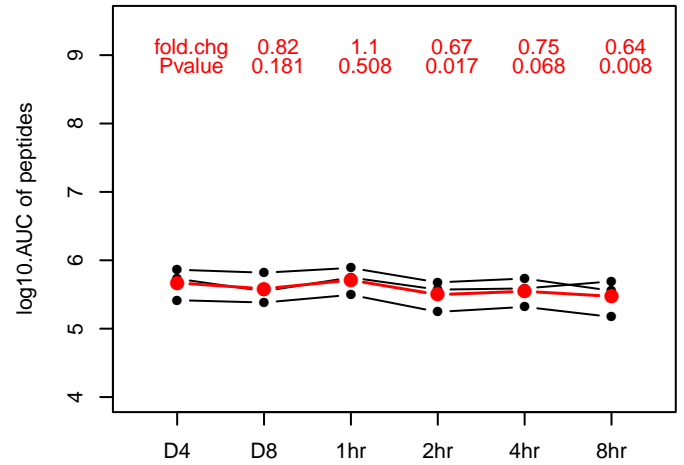

### TYB10\_HUMAN

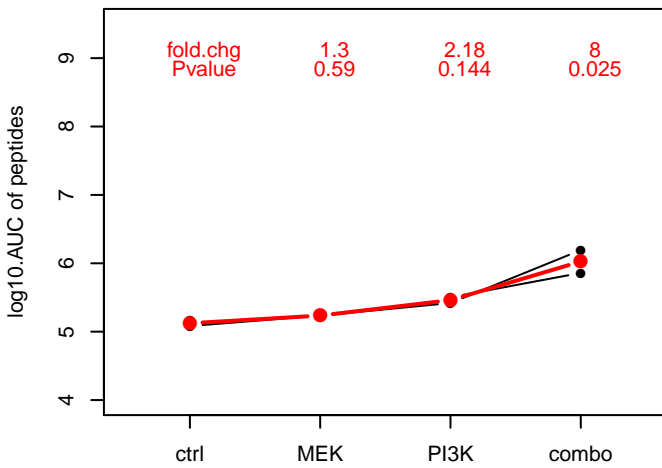

### TYB10\_HUMAN

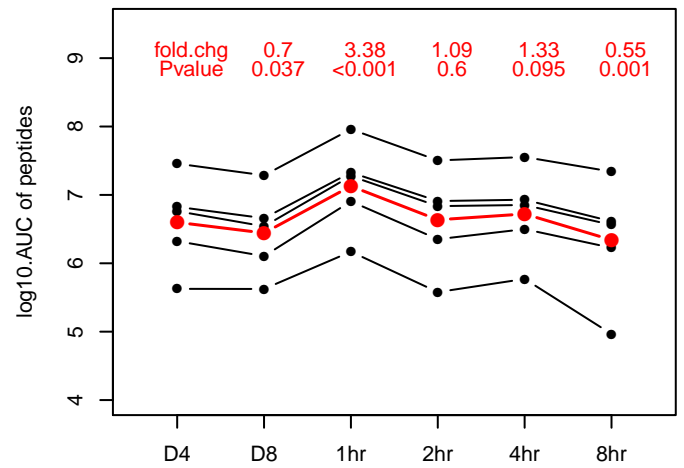

### U2AF1\_HUMAN

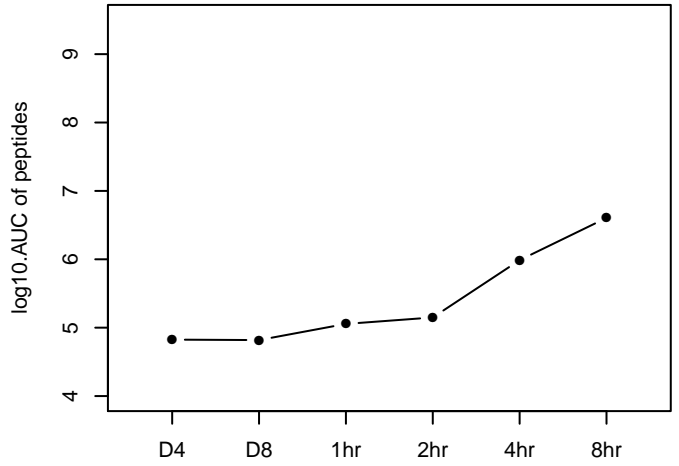

### U520\_HUMAN

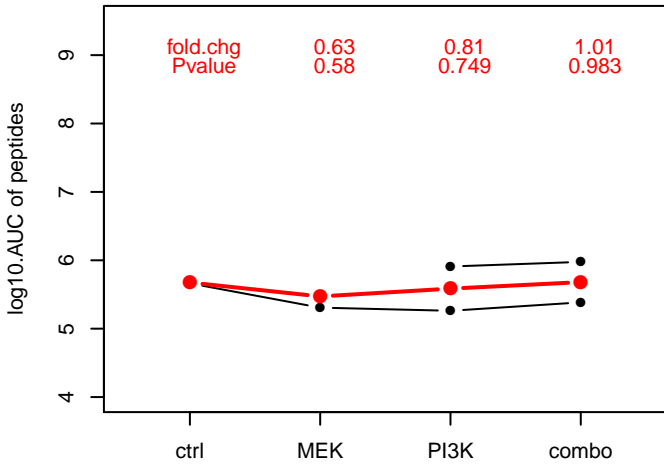

### U520\_HUMAN

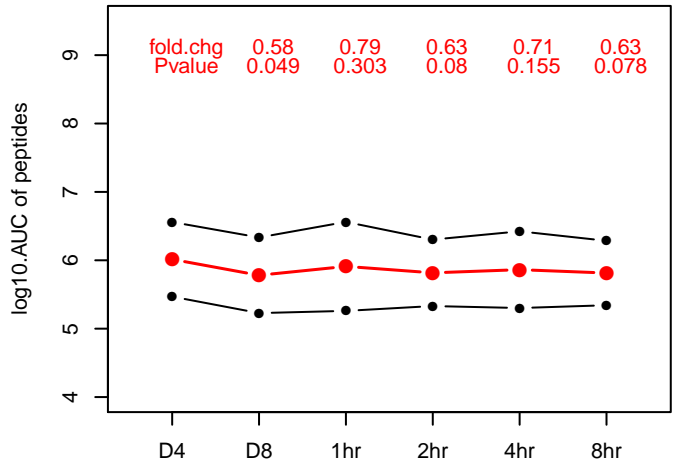

### U5S1\_HUMAN

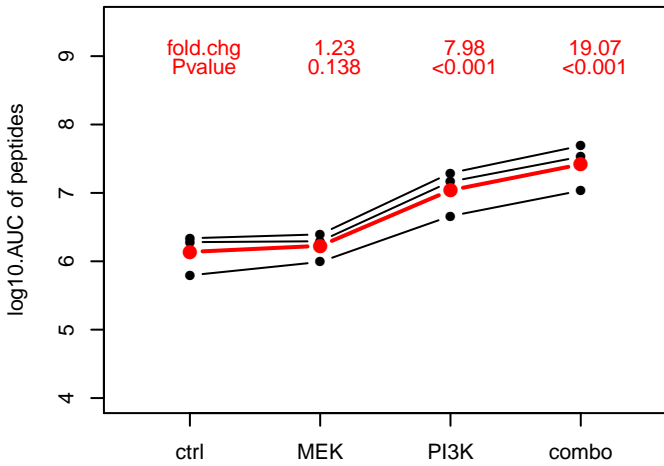

### U5S1\_HUMAN

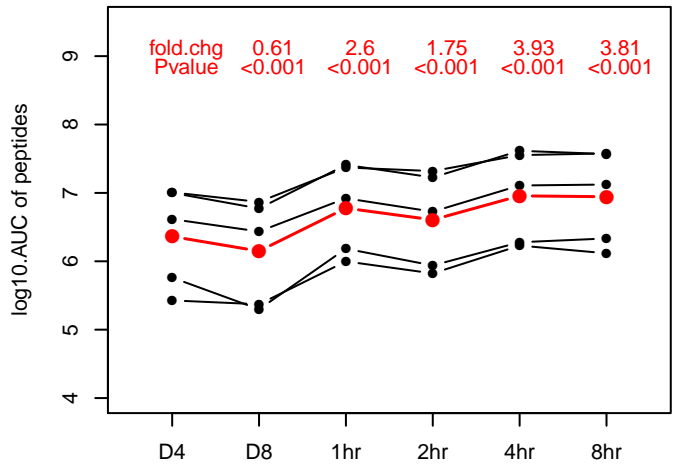

### UACA\_HUMAN

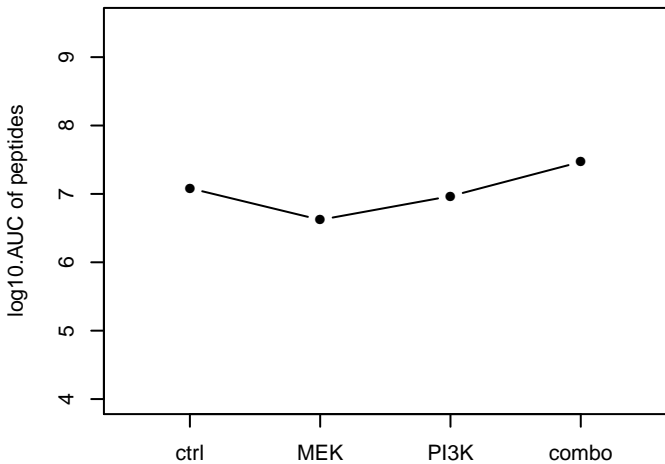

### UACA\_HUMAN

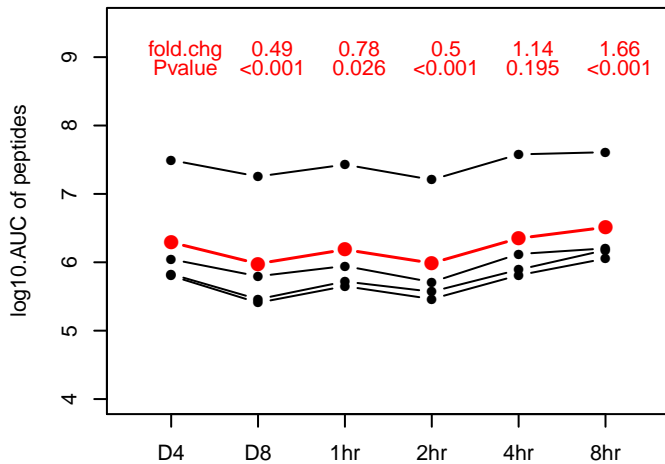

### UBA1\_HUMAN

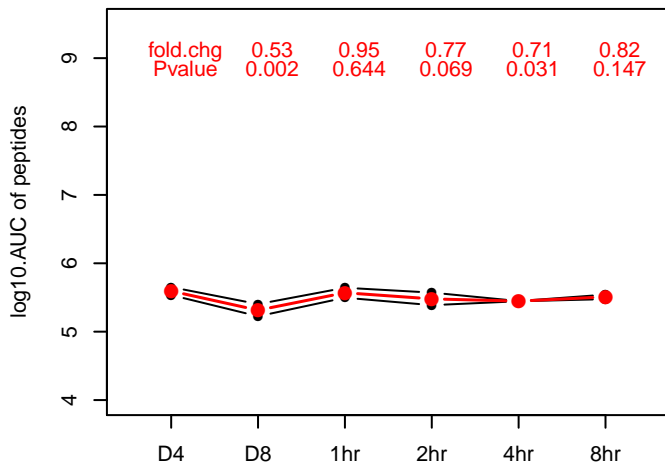

### UBE2N\_HUMAN

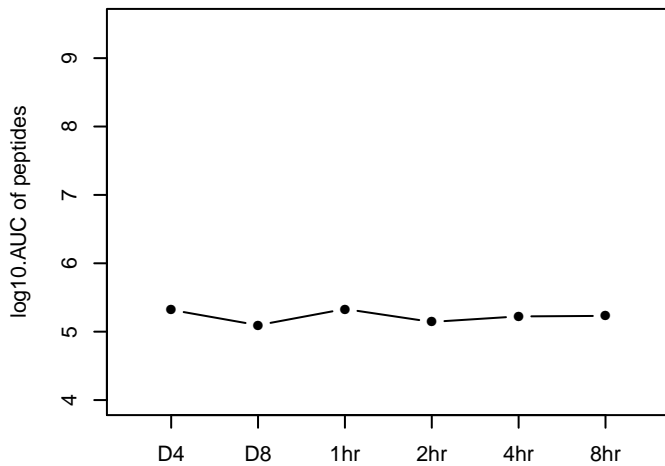

**UBE2T\_HUMAN**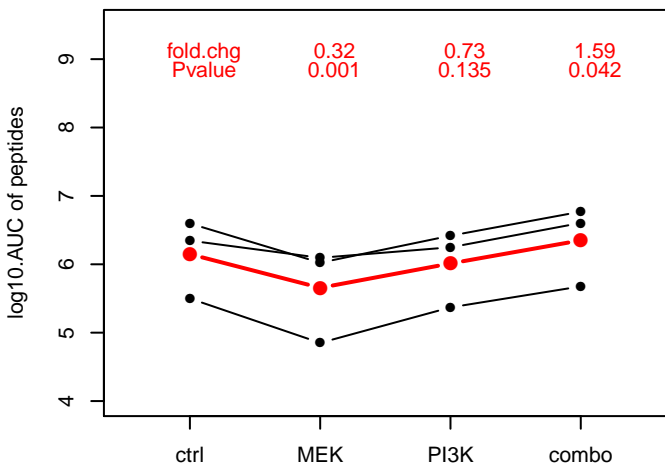**UBE2T\_HUMAN**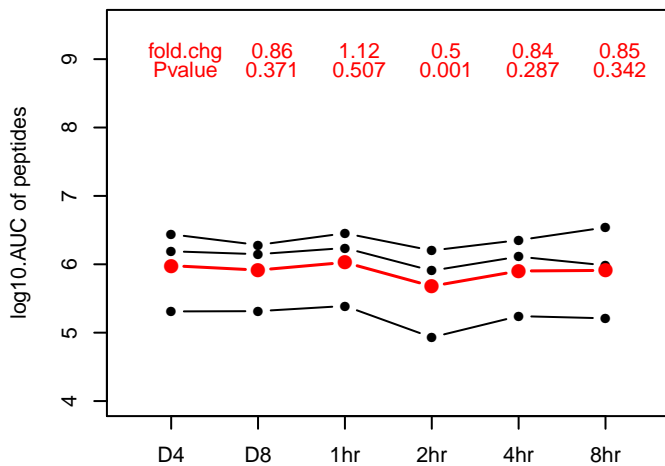**UBE3A\_HUMAN**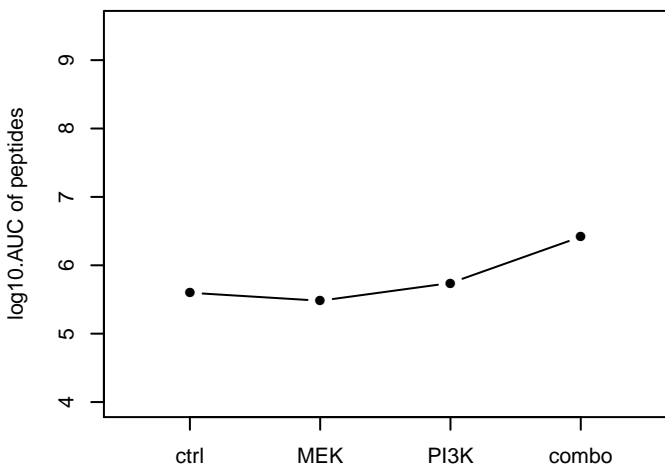**UBE3A\_HUMAN**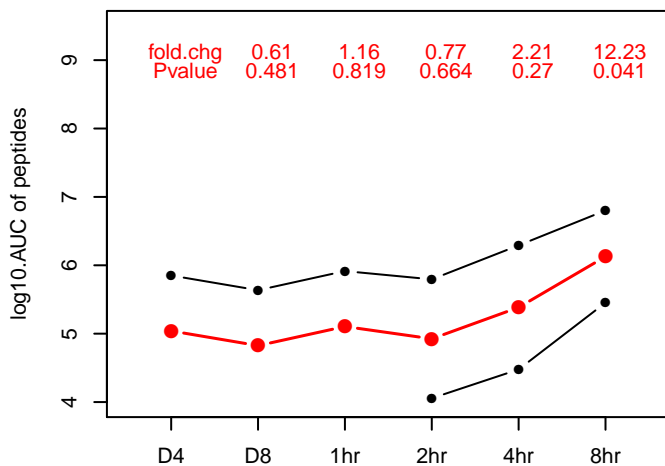**UBF1\_HUMAN**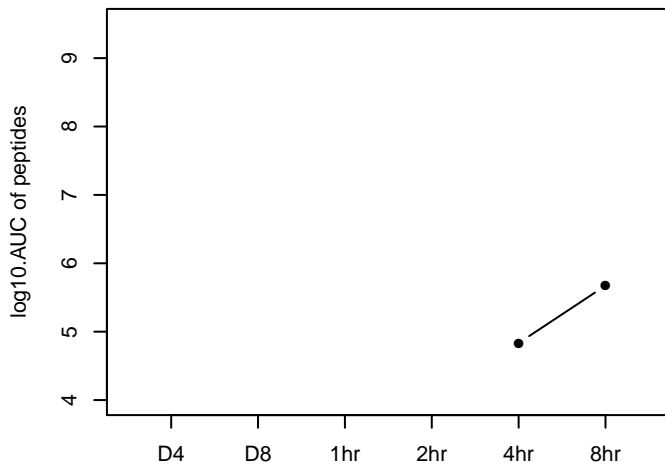

**UBP20\_HUMAN**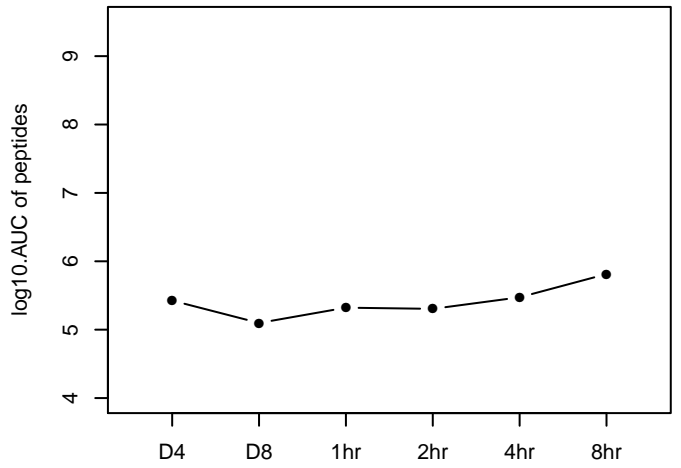**UBP25\_HUMAN**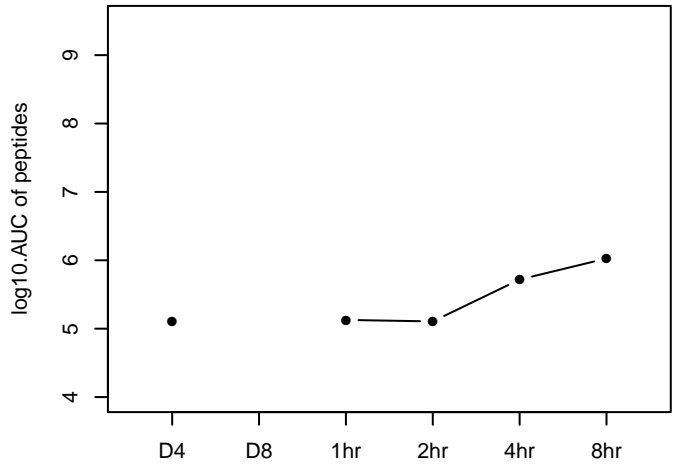**UBP2L\_HUMAN**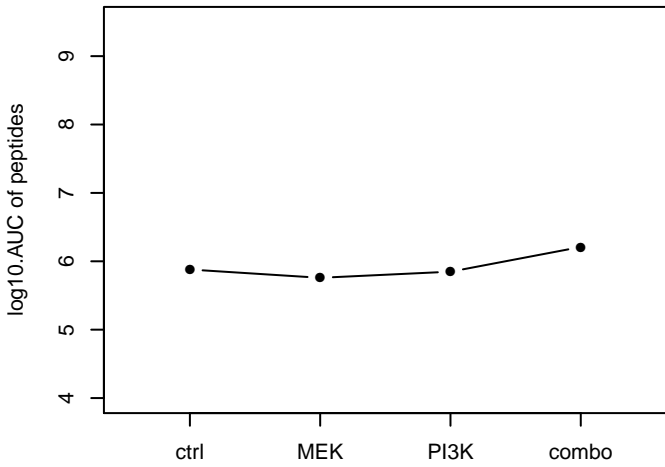**UBP2L\_HUMAN**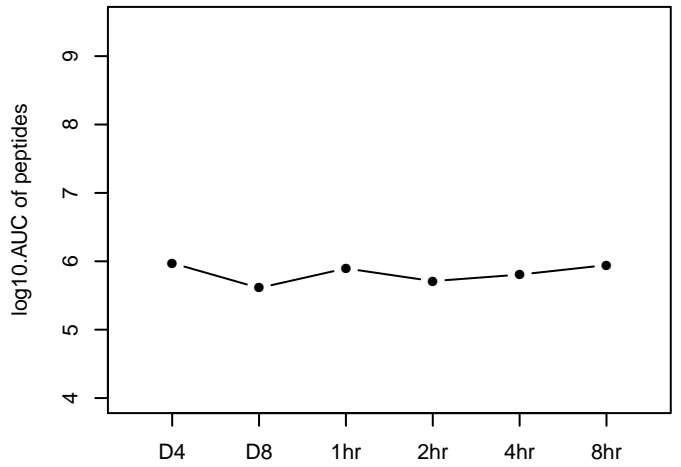

**UBP36\_HUMAN**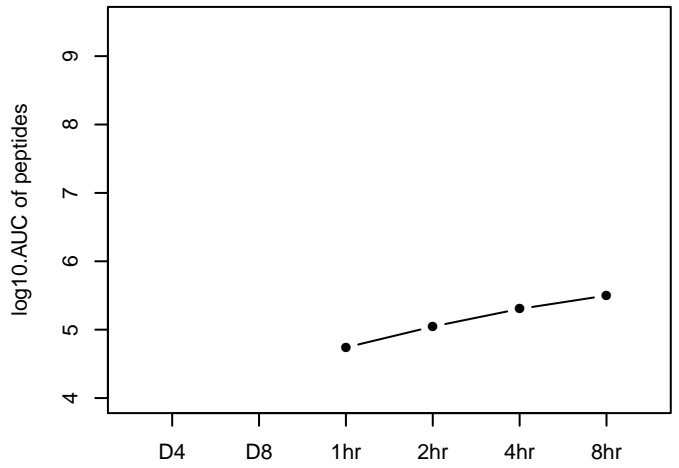**UBP40\_HUMAN**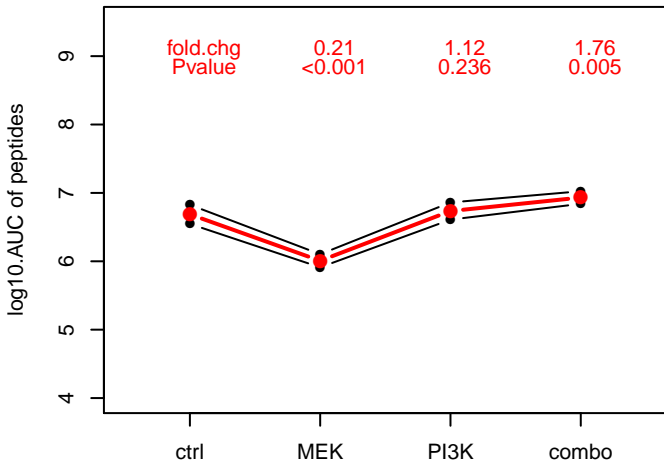**UBP40\_HUMAN**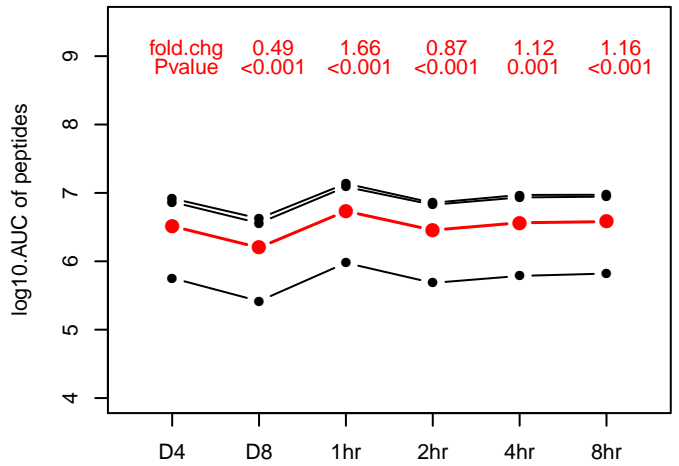**UBP48\_HUMAN**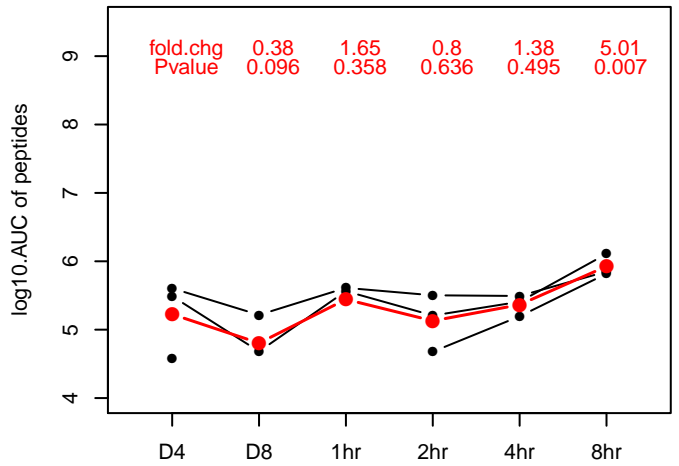

**UBP5\_HUMAN**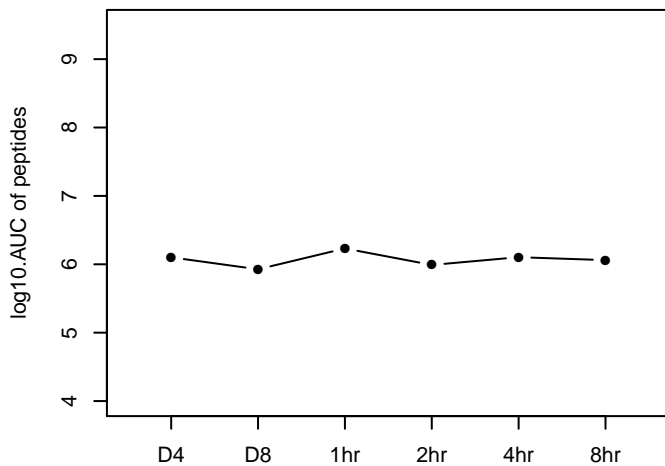**UBR1\_HUMAN**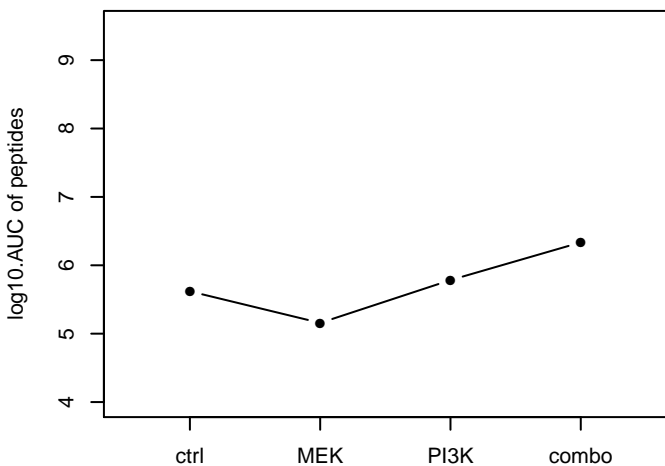**UBR1\_HUMAN**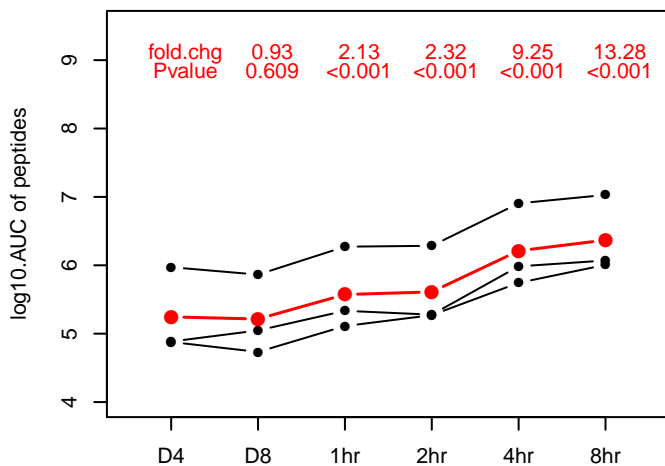**UBR5\_HUMAN**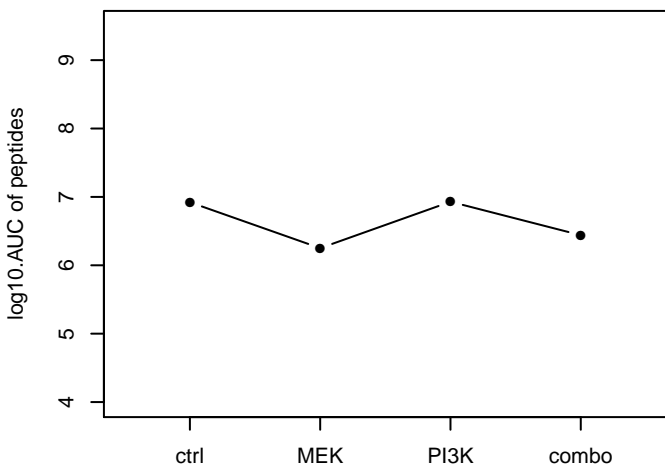**UBR5\_HUMAN**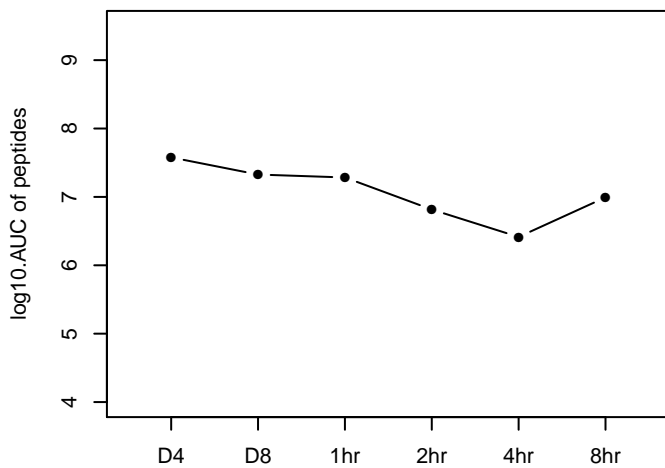

### UBXN4\_HUMAN

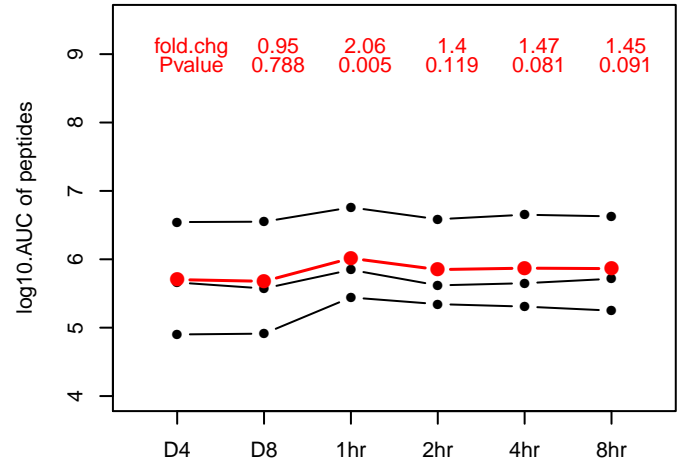

### UBXN7\_HUMAN

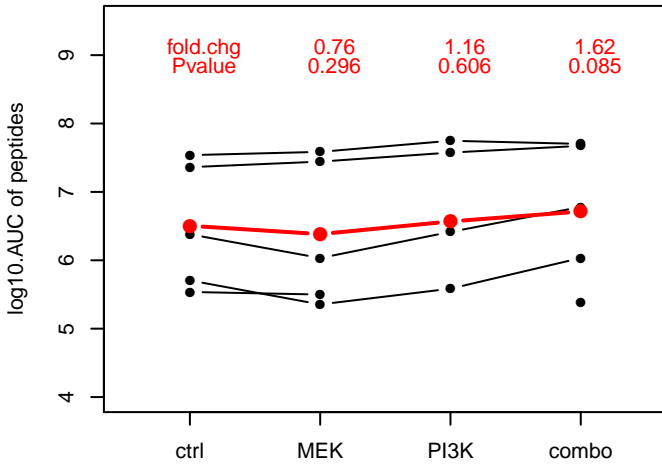

### UBXN7\_HUMAN

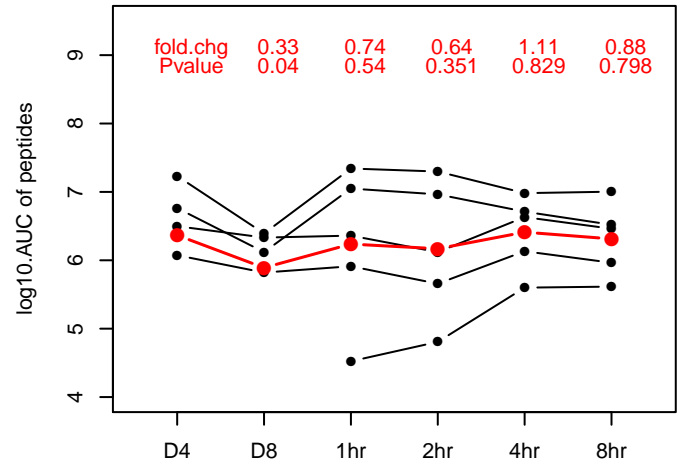

### UCKL1\_HUMAN

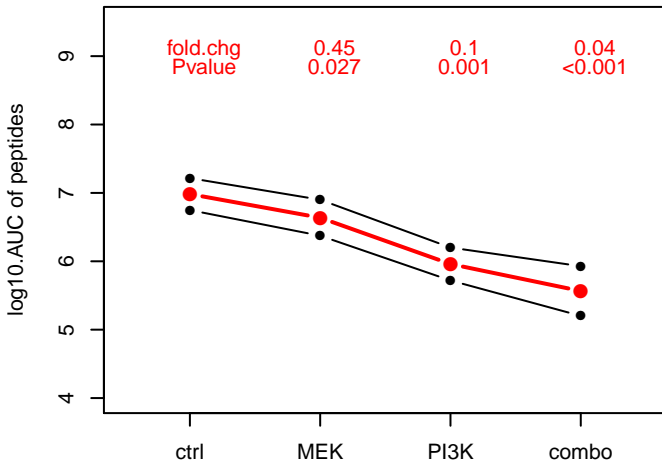

### UCKL1\_HUMAN

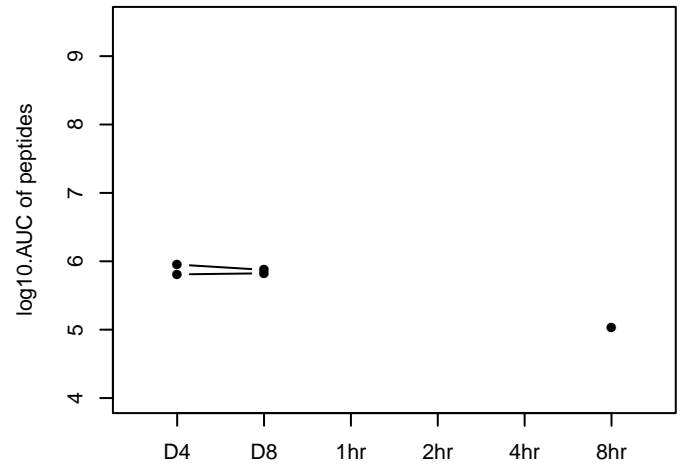



### UIMC1\_HUMAN

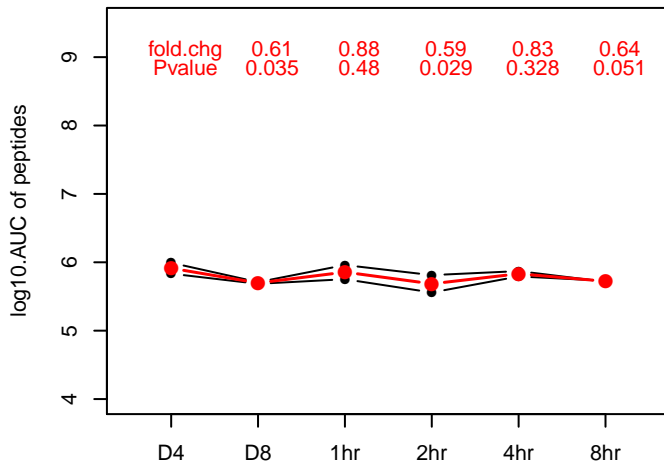

### URFB1\_HUMAN

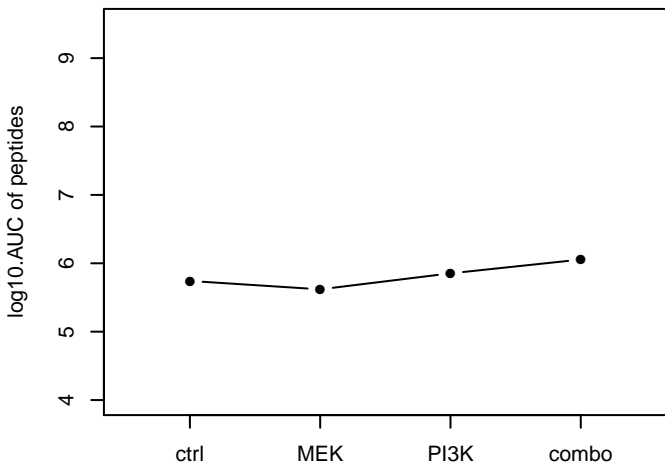

### URFB1\_HUMAN

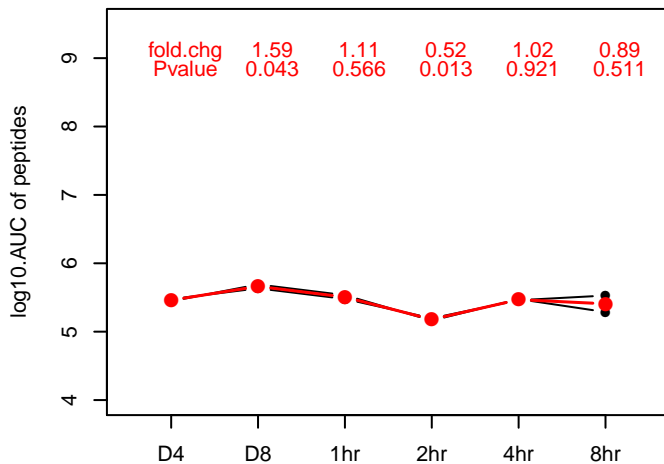

### US6NL\_HUMAN

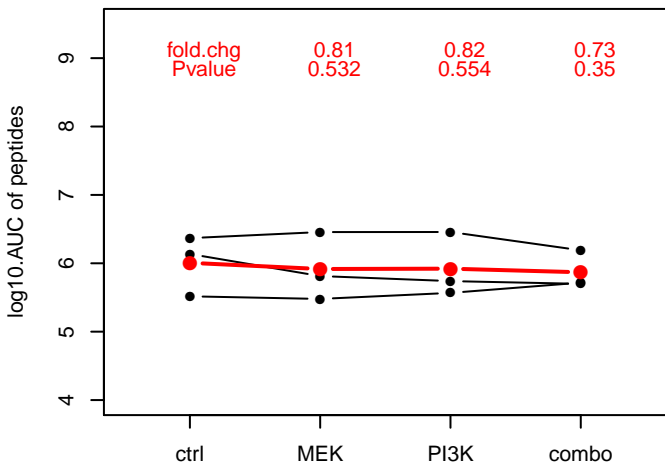

### US6NL\_HUMAN

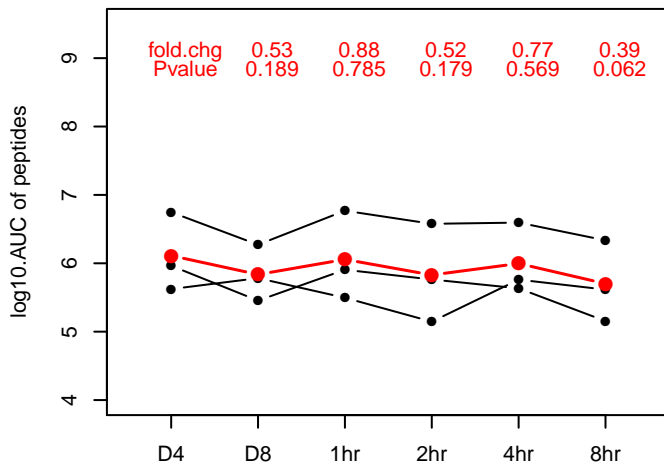

### USP9X\_HUMAN

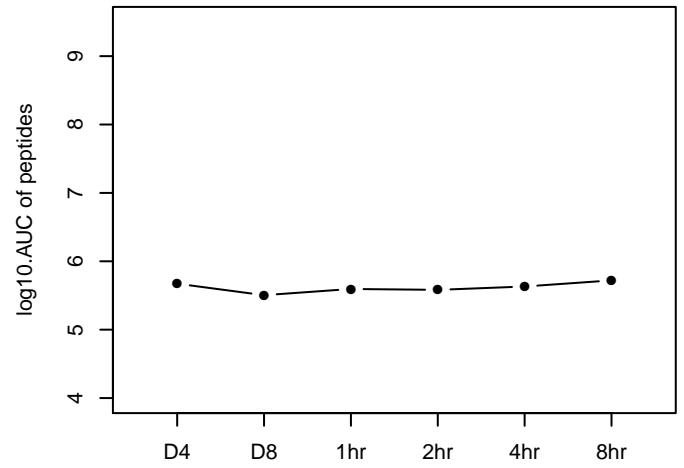

### UT14A\_HUMAN

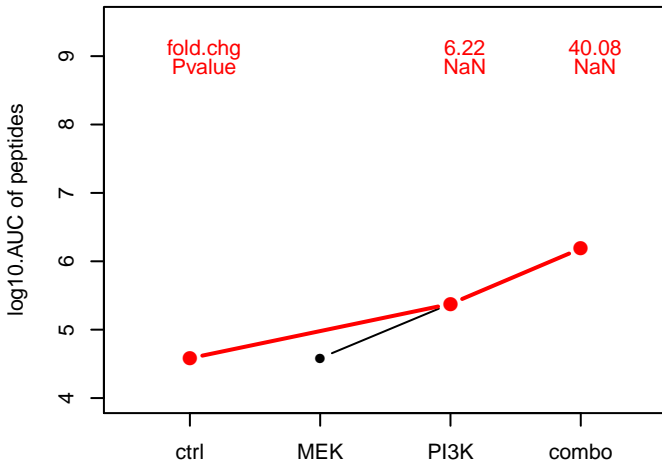

### UT14A\_HUMAN

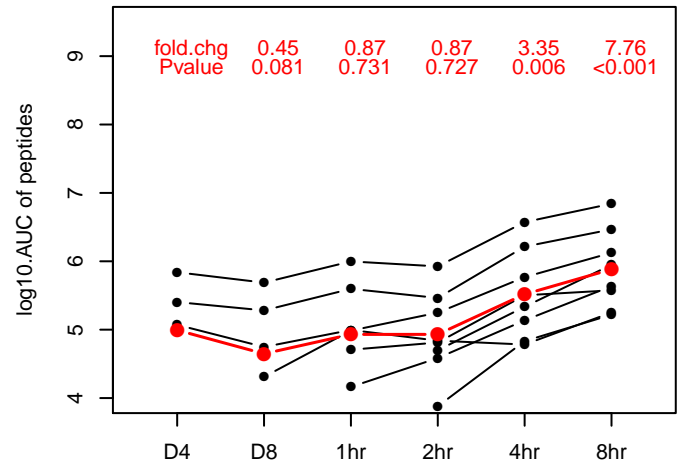

### UTP18\_HUMAN

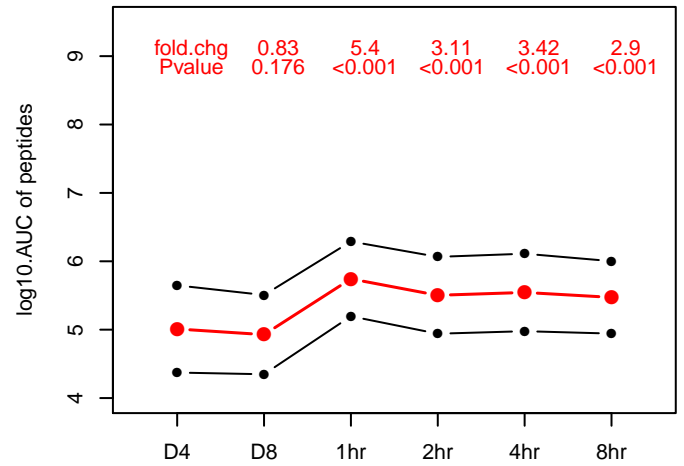

### VAMP2\_HUMAN

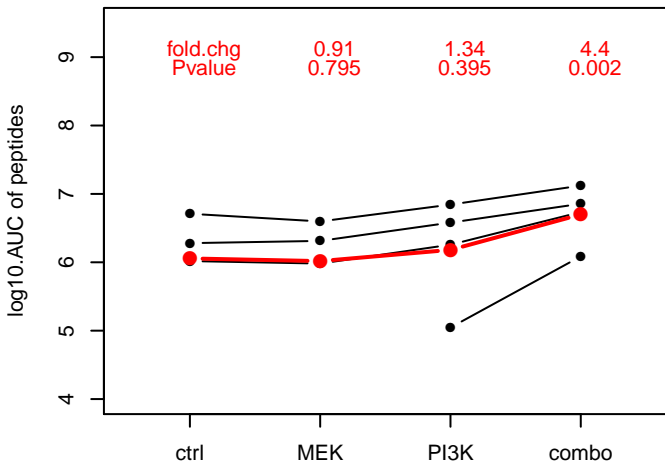

### VAMP2\_HUMAN

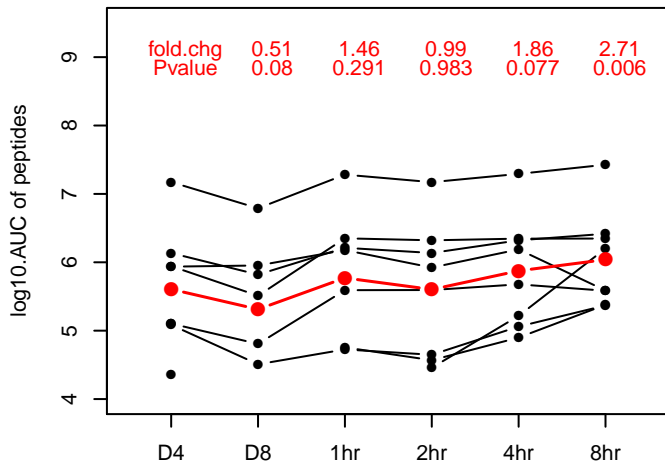

### VAMP3\_HUMAN

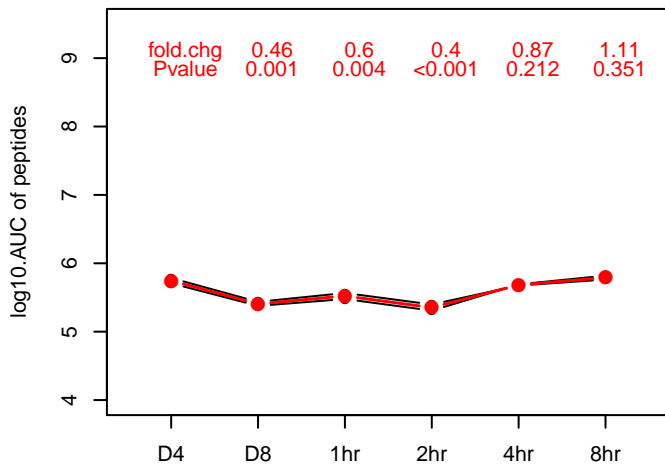

### VAMP7\_HUMAN

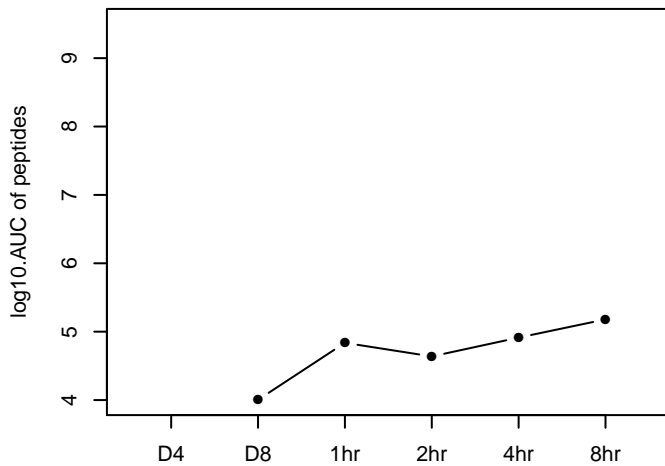

### VANG1\_HUMAN

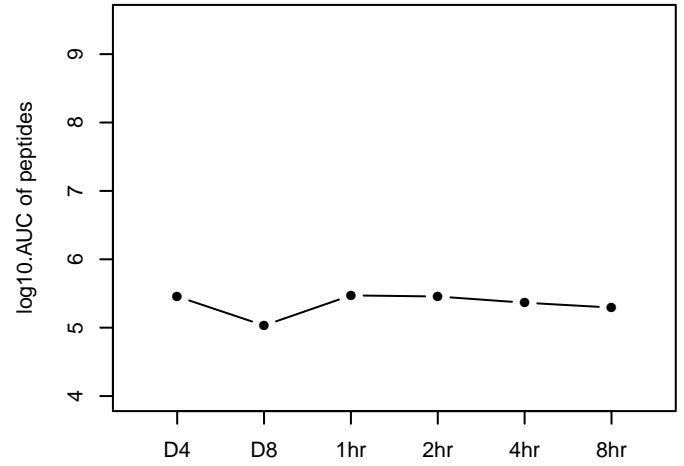

### VDAC1\_HUMAN

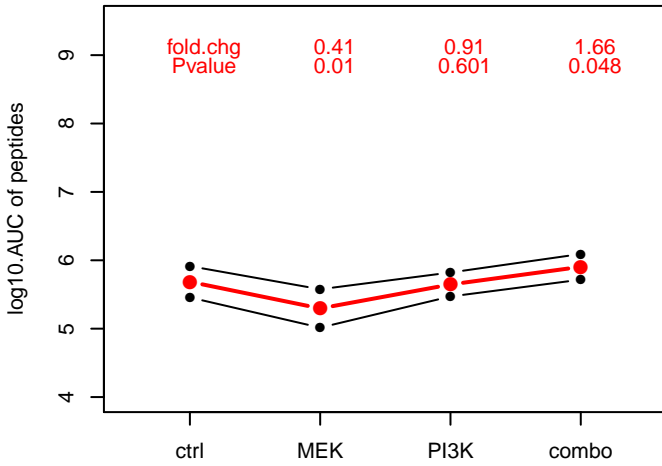

### VDAC1\_HUMAN

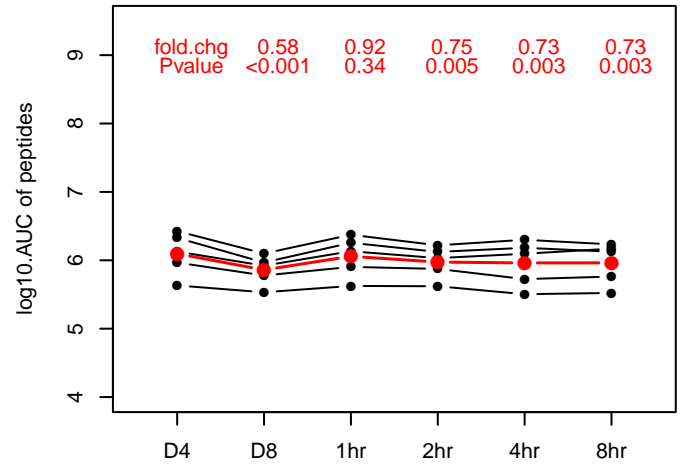

### VDAC2\_HUMAN

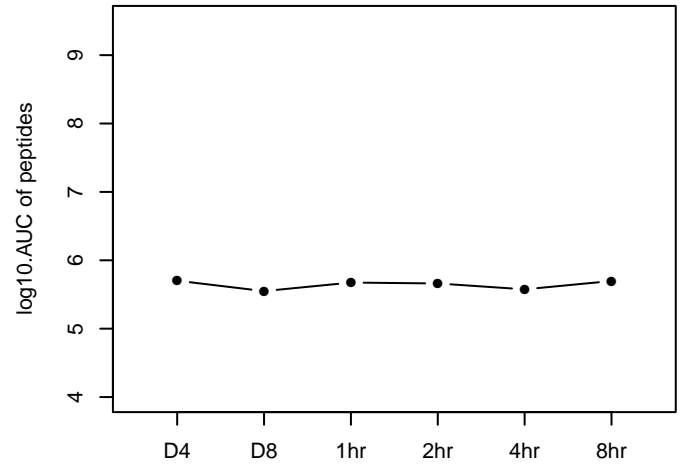

**VIGLN\_HUMAN**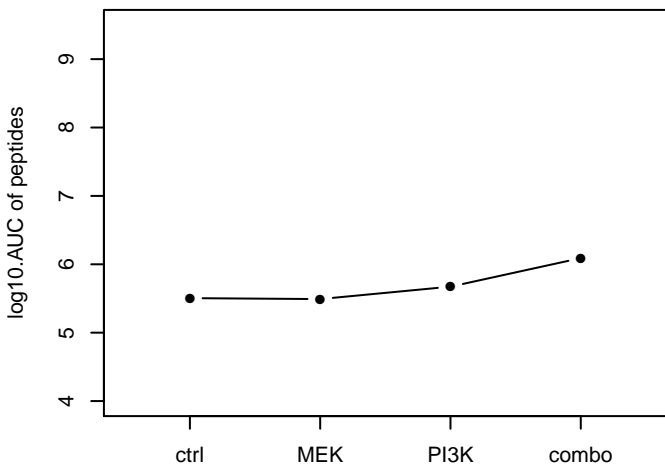**VIGLN\_HUMAN**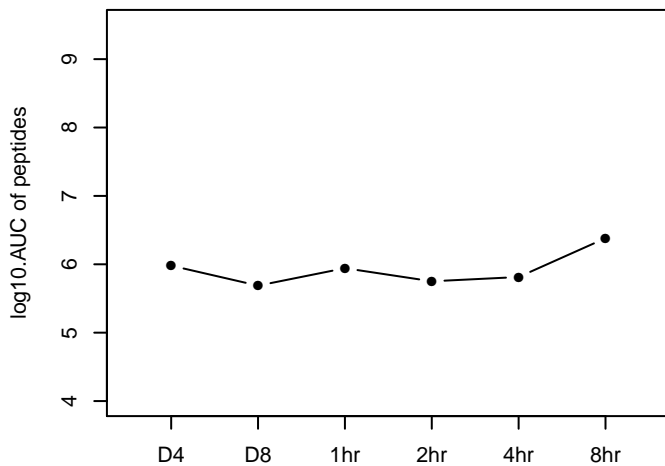**VIME\_HUMAN**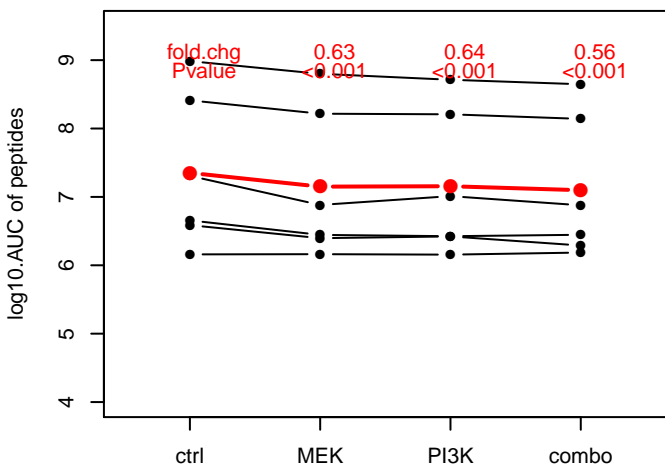**VIME\_HUMAN**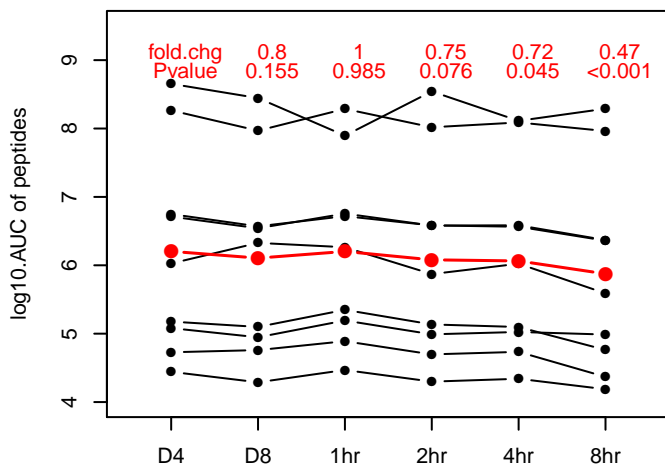**VINC\_HUMAN**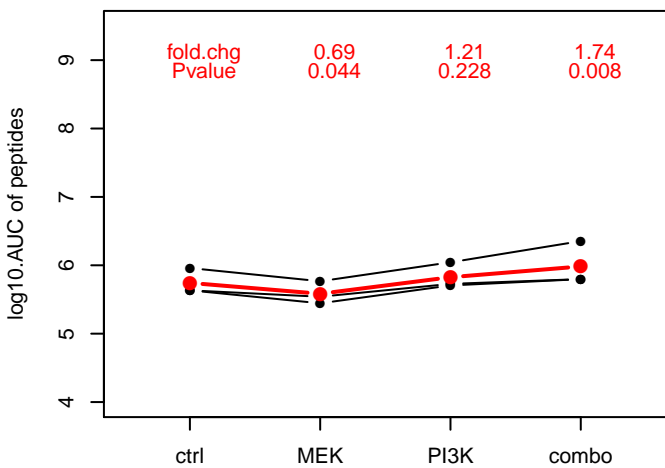**VINC\_HUMAN**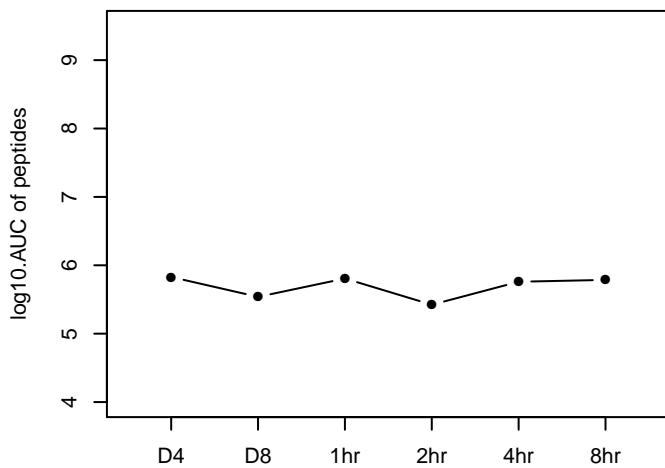

**VP13B\_HUMAN**

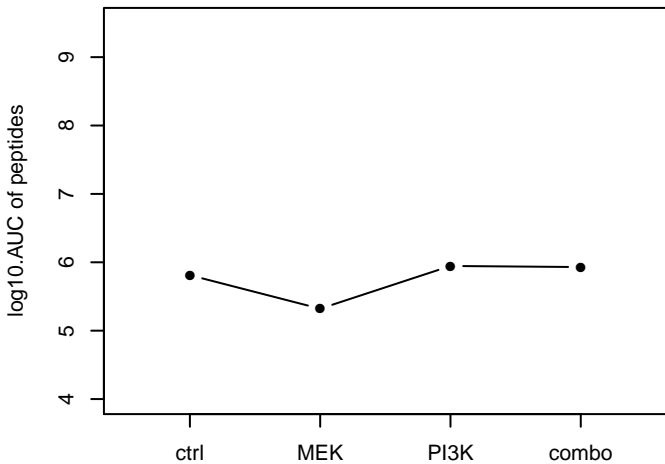

**VP13B\_HUMAN**

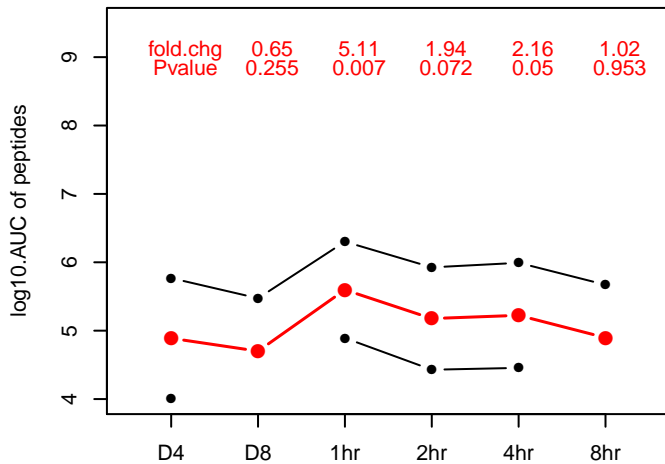

**VP26A\_HUMAN**

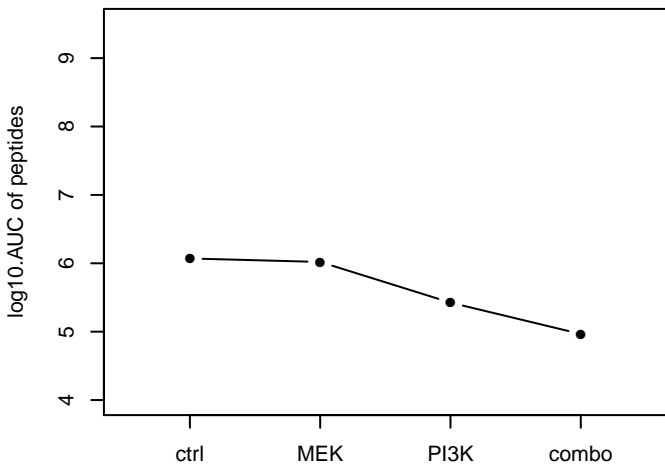

**VP26A\_HUMAN**

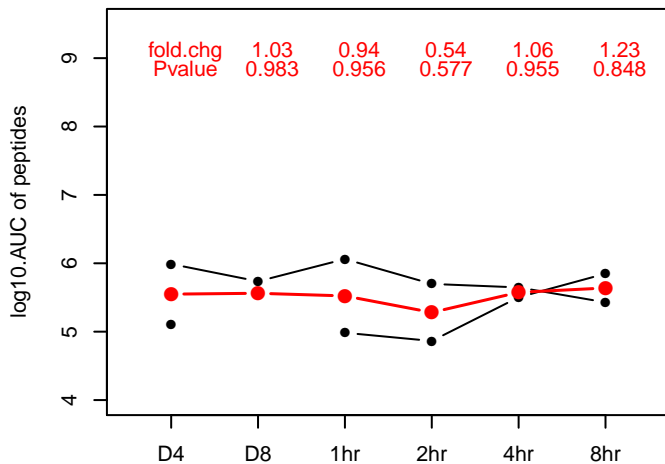

**VP26B\_HUMAN**

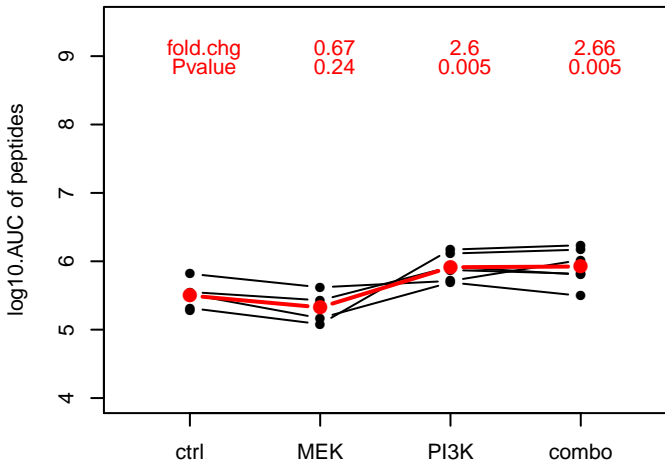

**VP26B\_HUMAN**

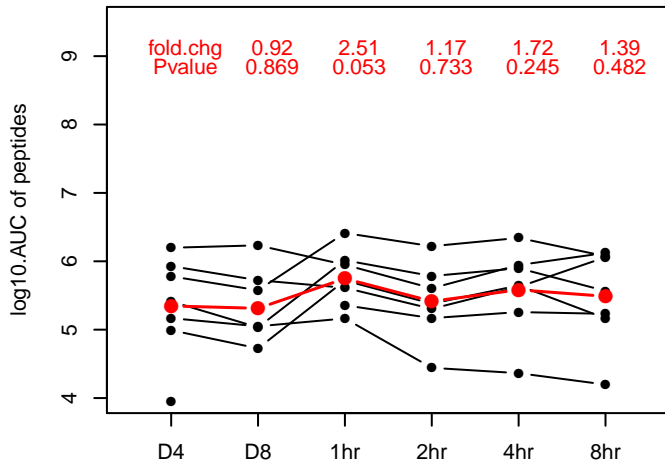

### VRK1\_HUMAN

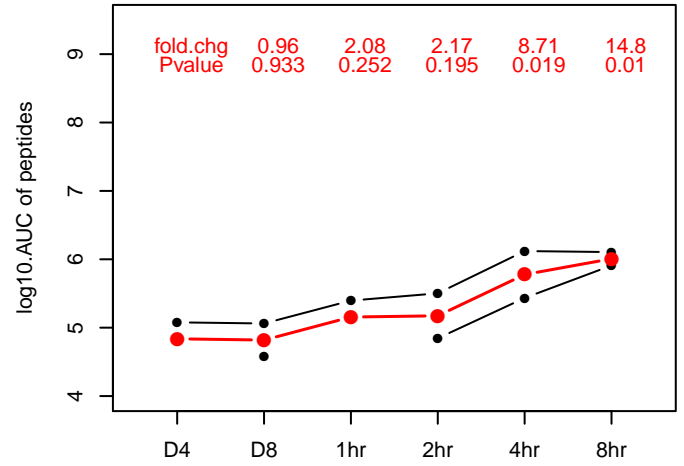

### WBP11\_HUMAN

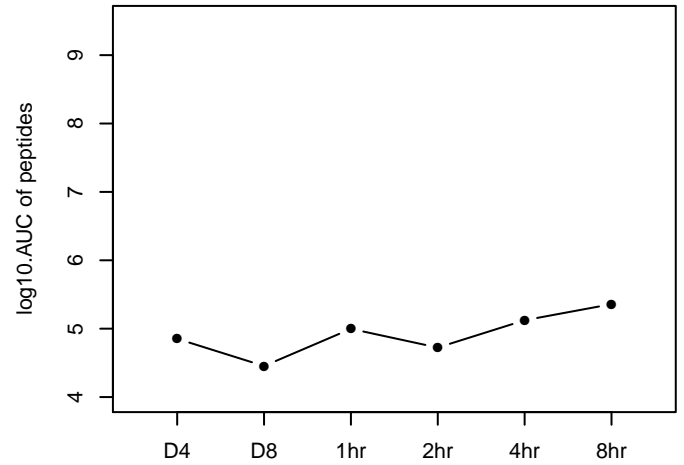

### WBP2\_HUMAN

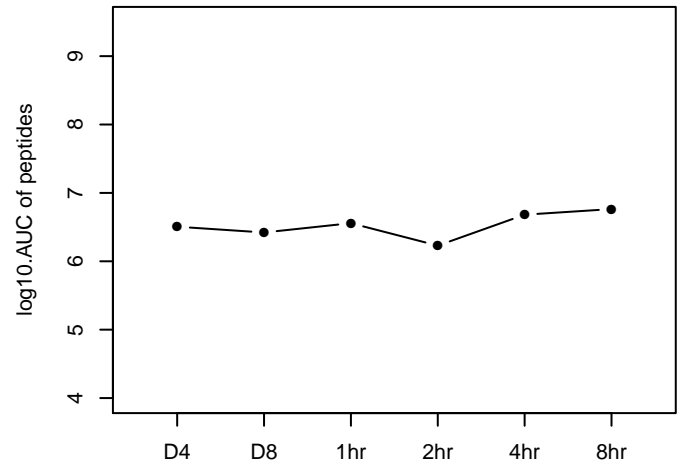

### WDHD1\_HUMAN

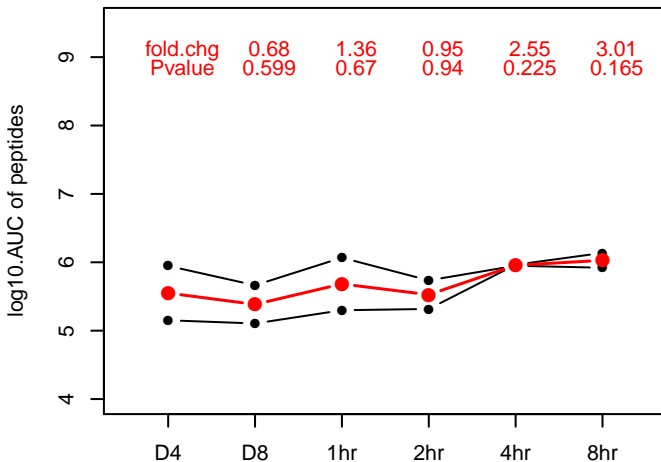

### WDR1\_HUMAN

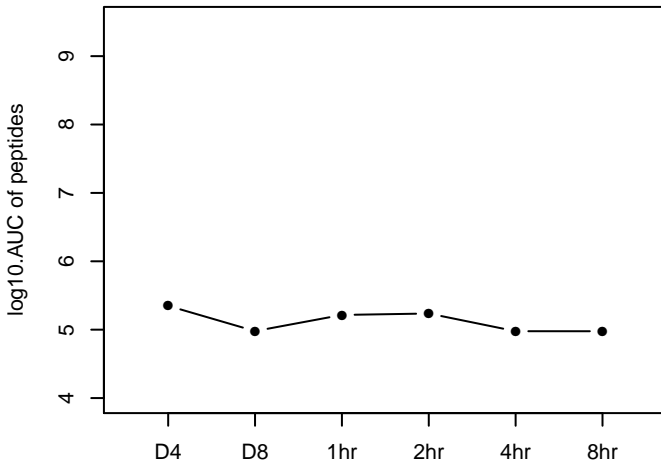

### WDR26\_HUMAN

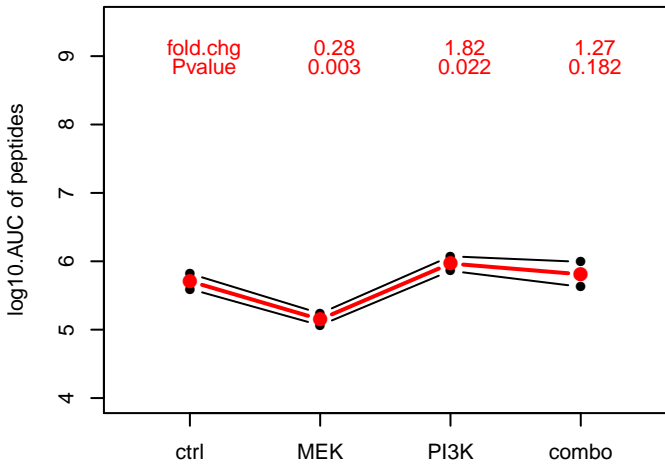

### WDR26\_HUMAN

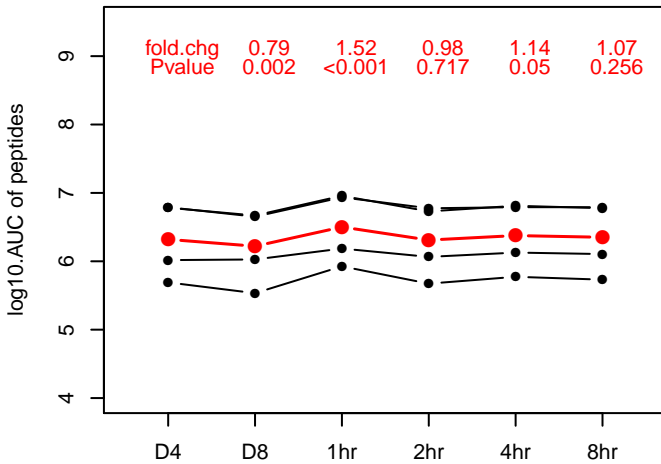



**WDR37\_HUMAN**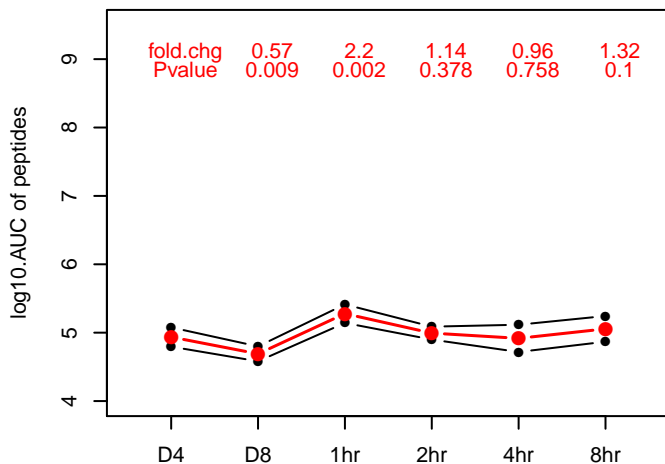**WDR46\_HUMAN**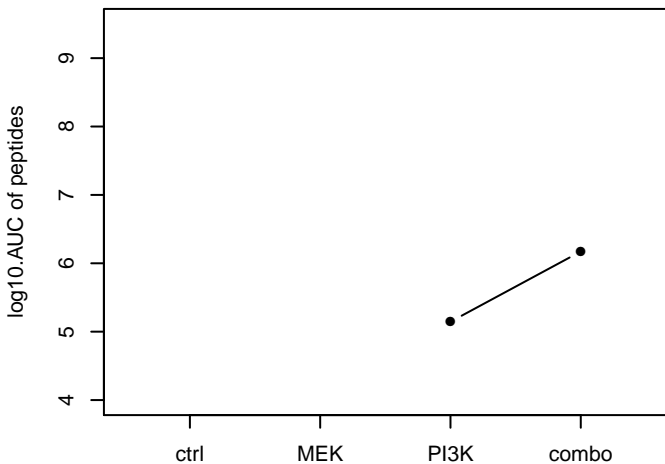**WDR46\_HUMAN**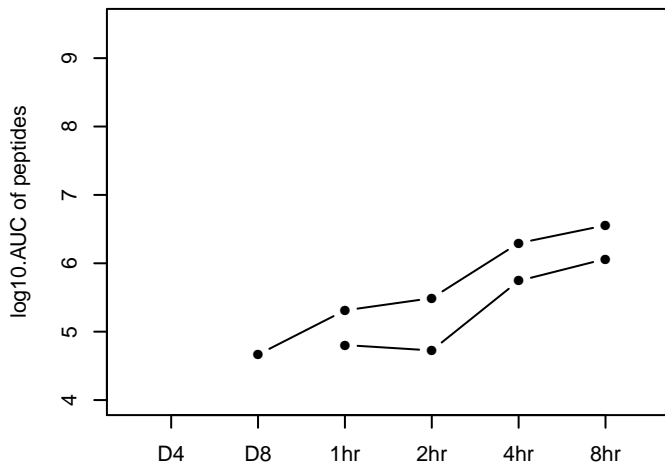**WDR7\_HUMAN**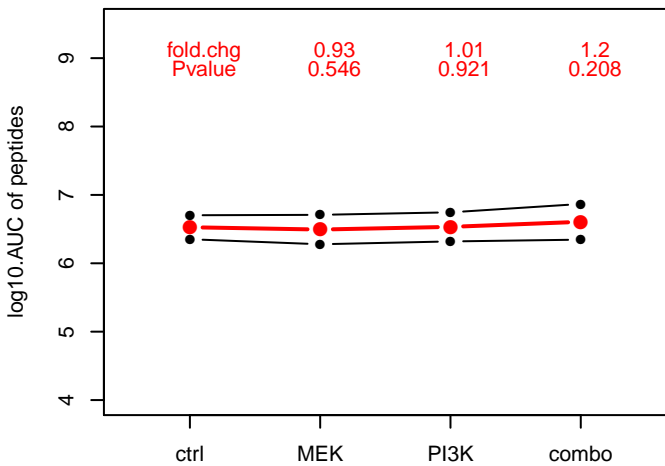**WDR7\_HUMAN**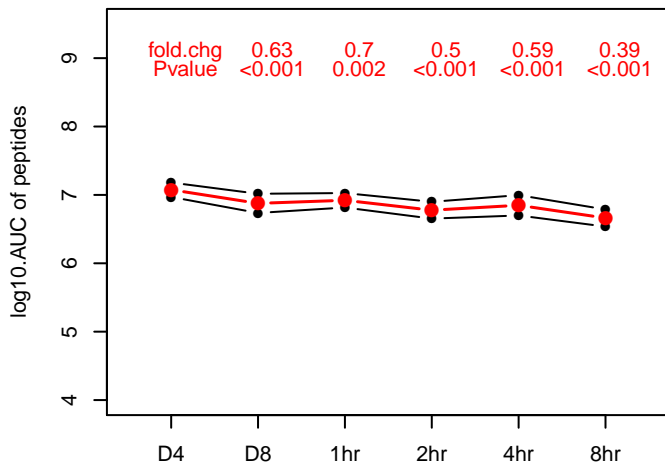

### WDR70\_HUMAN

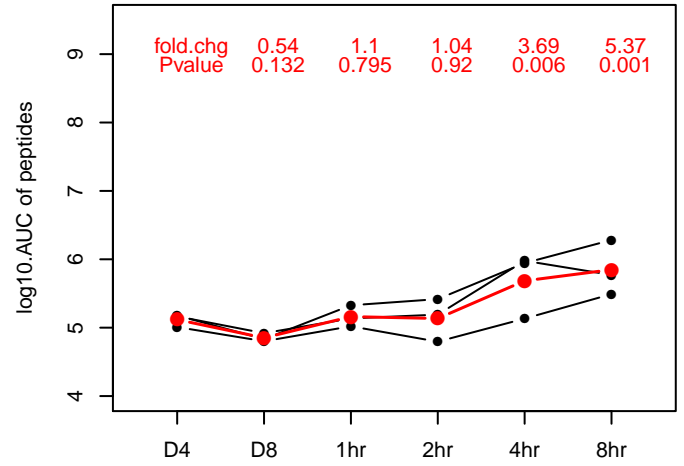

### WDR91\_HUMAN

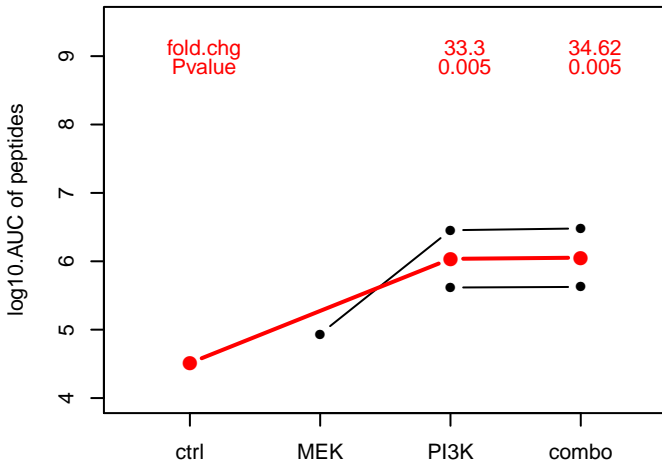

### WNK1\_HUMAN

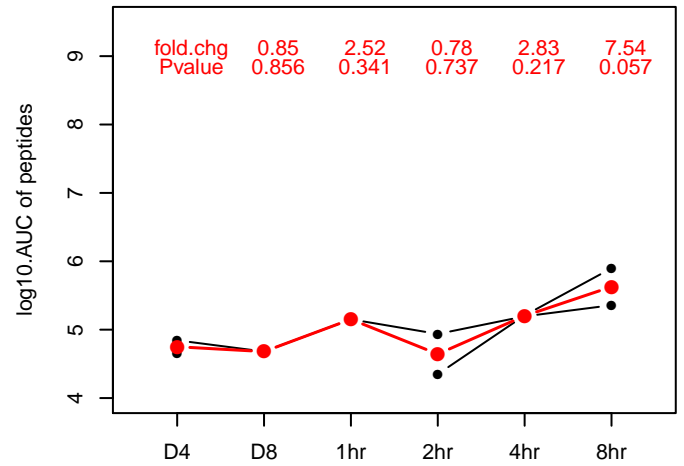

**XPO1\_HUMAN**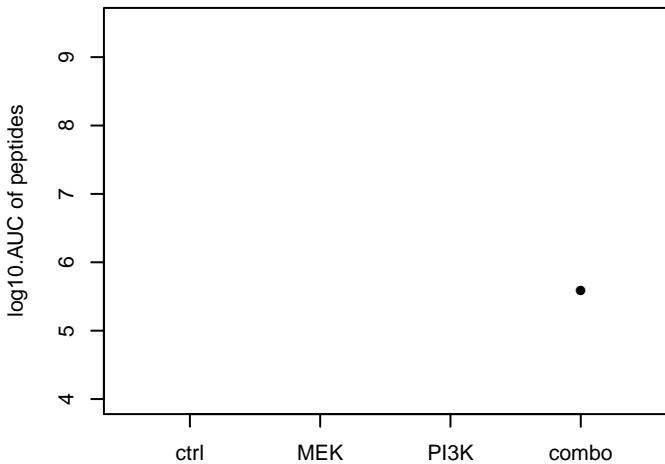**XPO1\_HUMAN**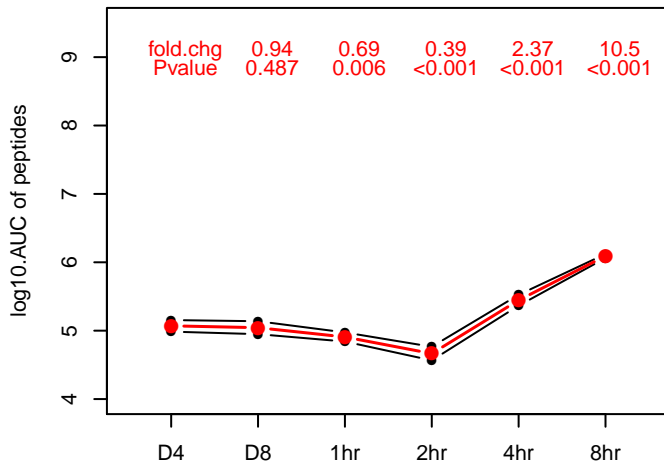**XPO5\_HUMAN**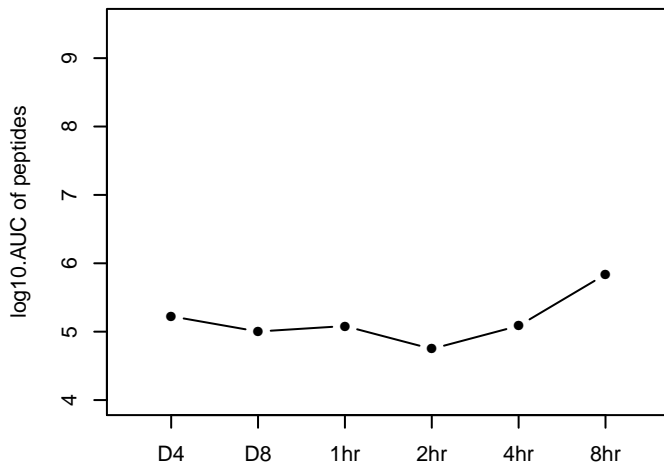**XRCC5\_HUMAN**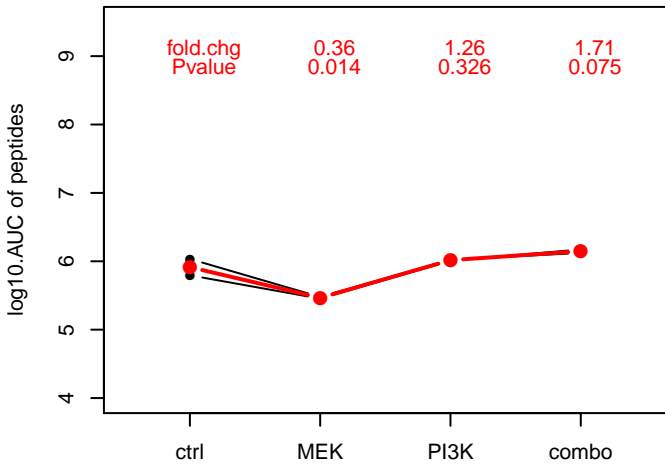**XRCC5\_HUMAN**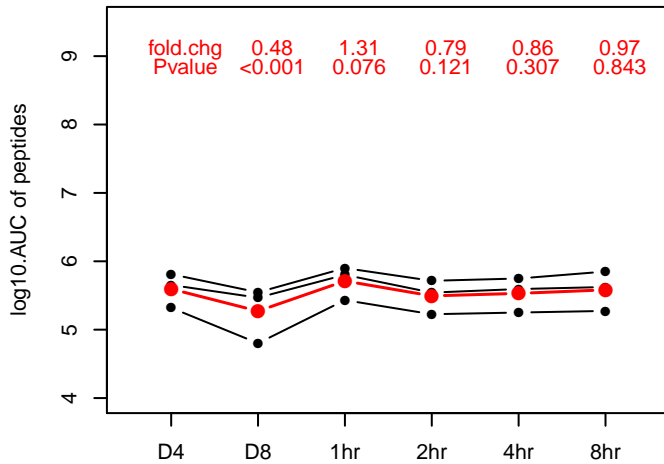

**XRN2\_HUMAN**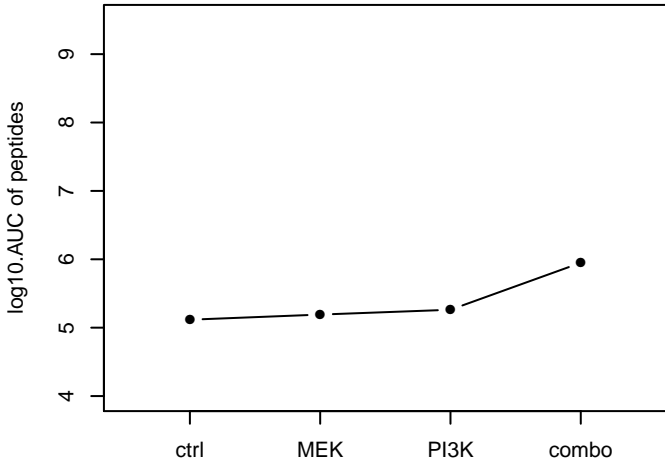**XRN2\_HUMAN**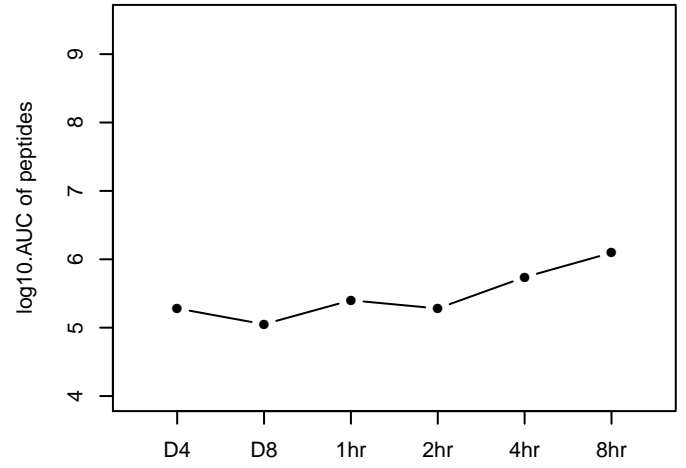**YAF2\_HUMAN**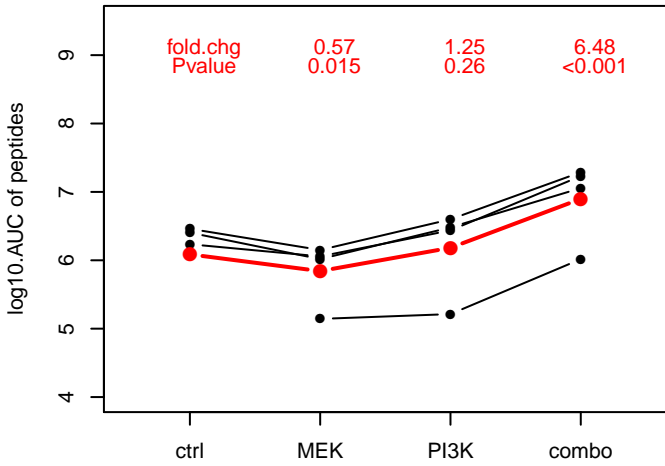**YAF2\_HUMAN**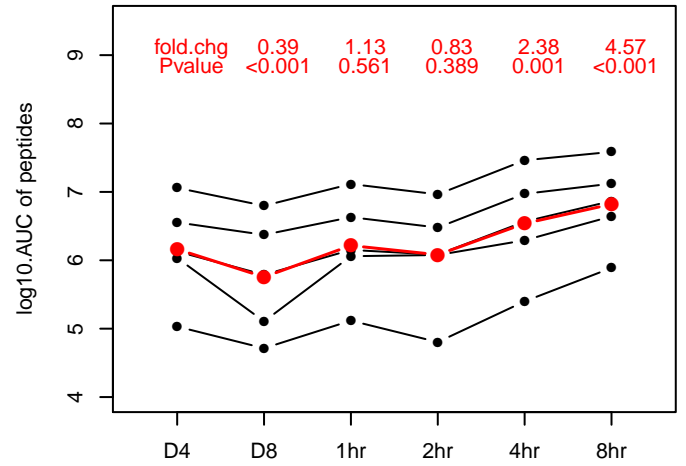**YBOX1\_HUMAN**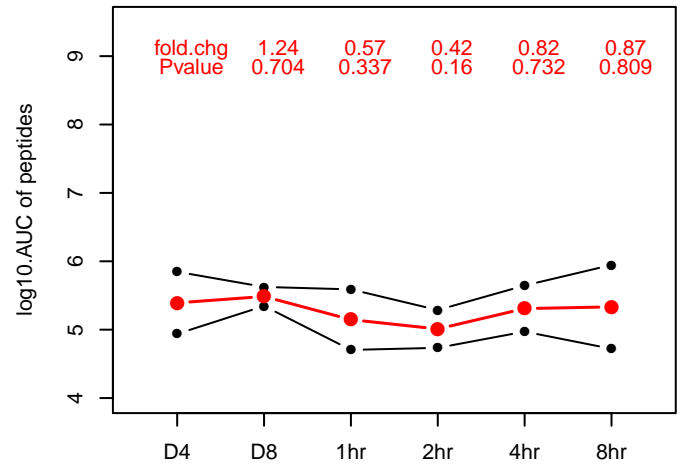

### YKT6\_HUMAN

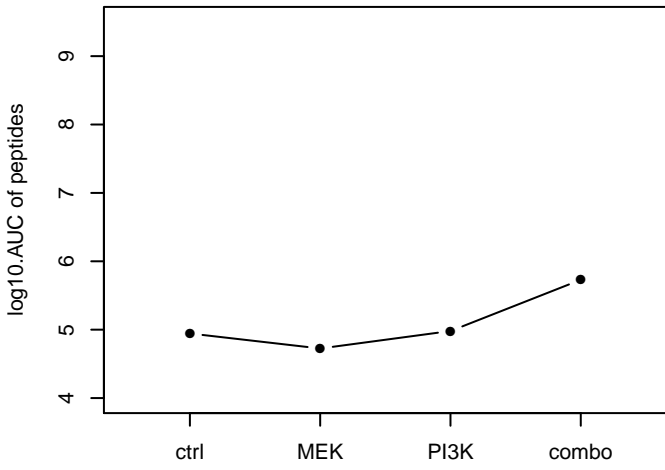

### YLAT2\_HUMAN

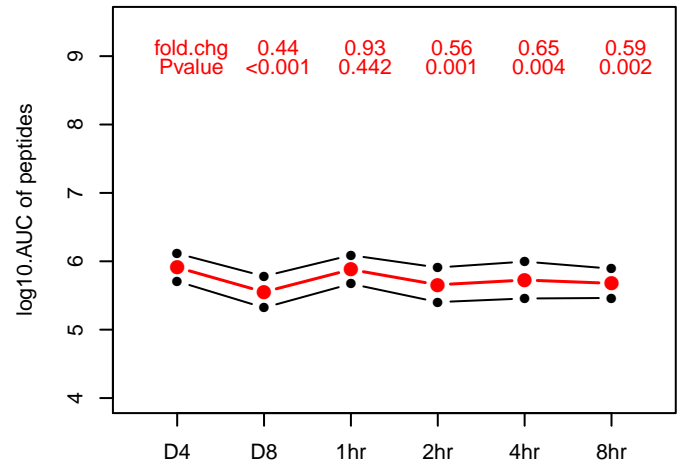

### YLPM1\_HUMAN

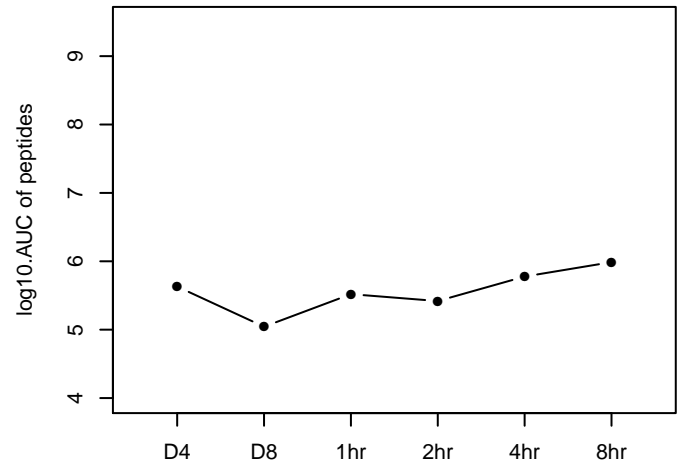

### YTDC1\_HUMAN

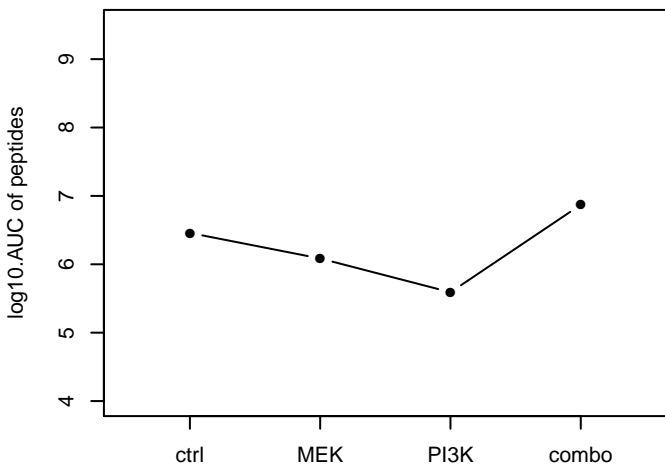

### ZBTB2\_HUMAN

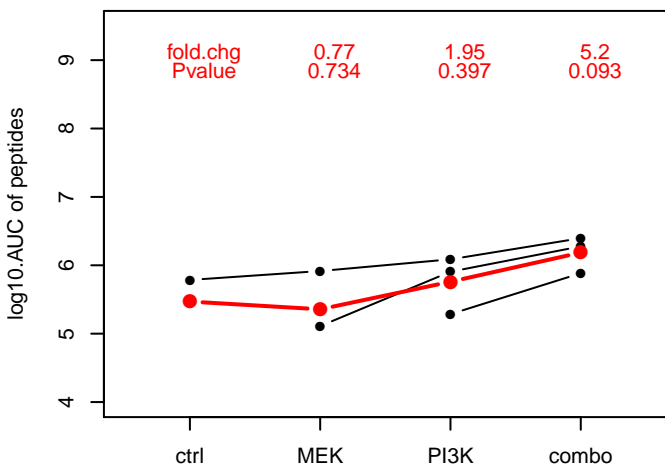

### ZBTB2\_HUMAN

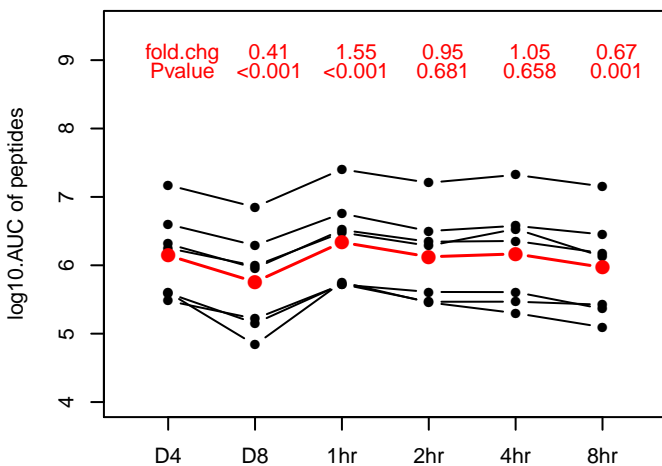

### ZC11A\_HUMAN

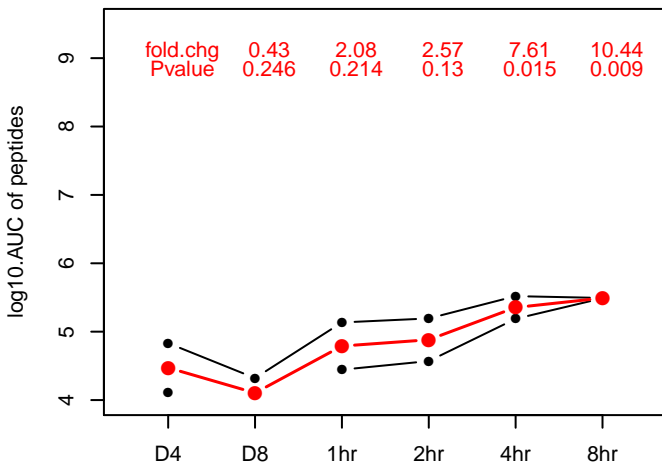

### ZC3HD\_HUMAN

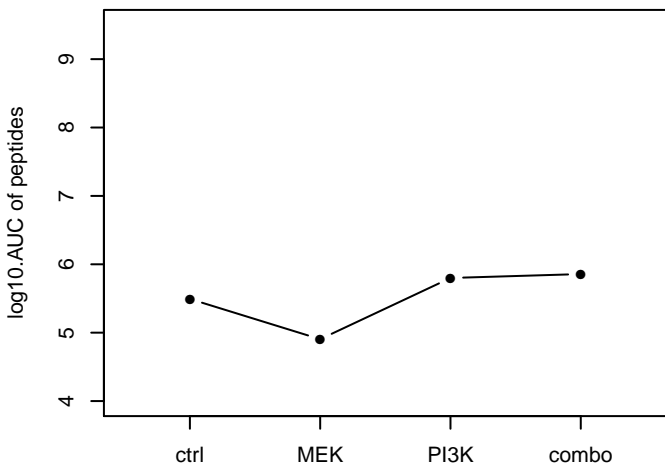

### ZC3HD\_HUMAN

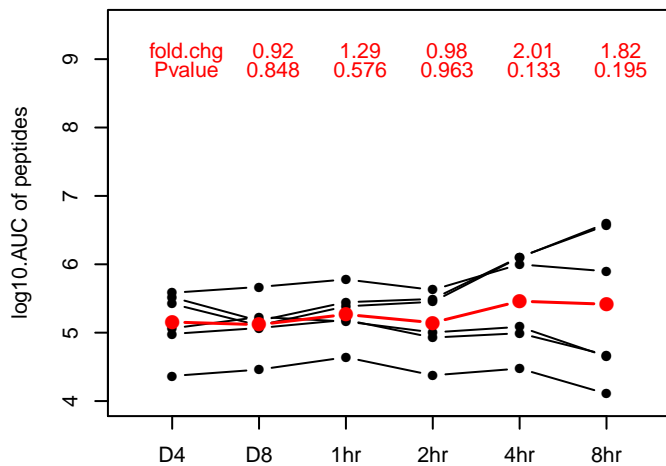

### ZC3HE\_HUMAN

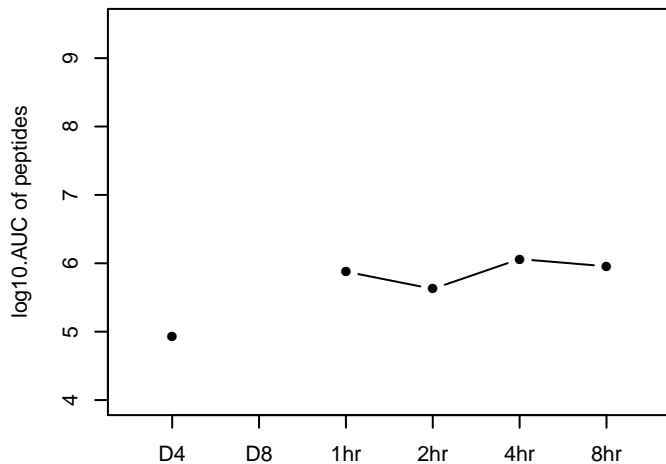

### ZC3HF\_HUMAN

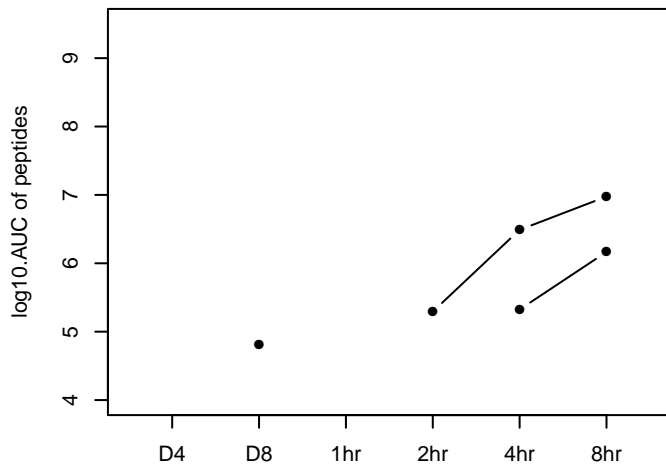

**ZCCHL\_HUMAN**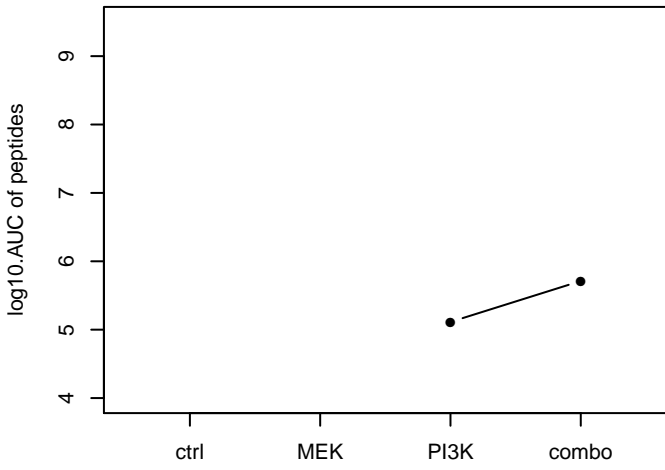**ZCCHL\_HUMAN**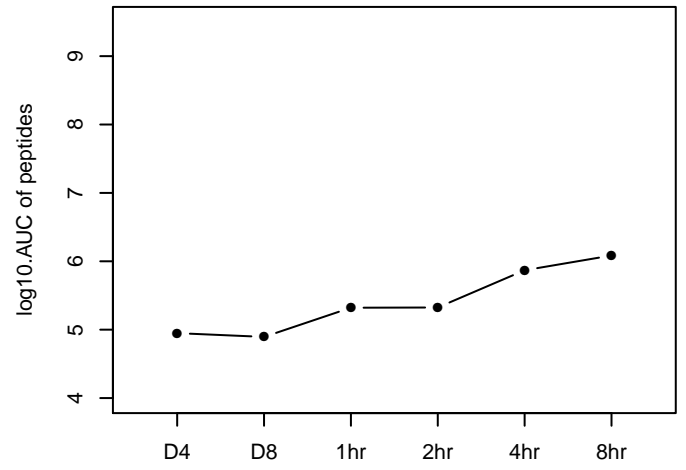**ZCCHV\_HUMAN**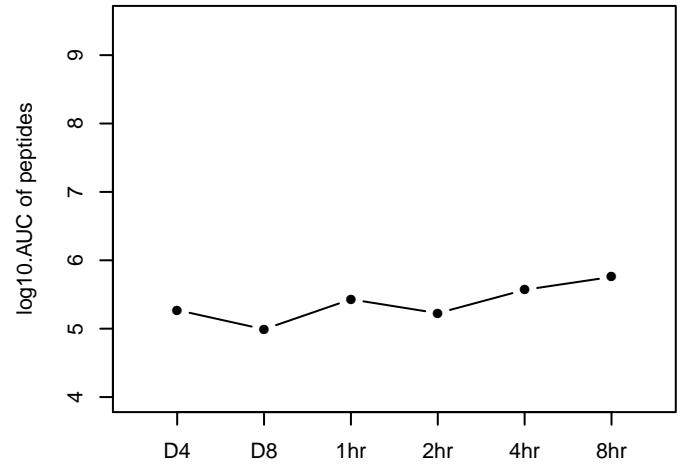**ZCHC8\_HUMAN**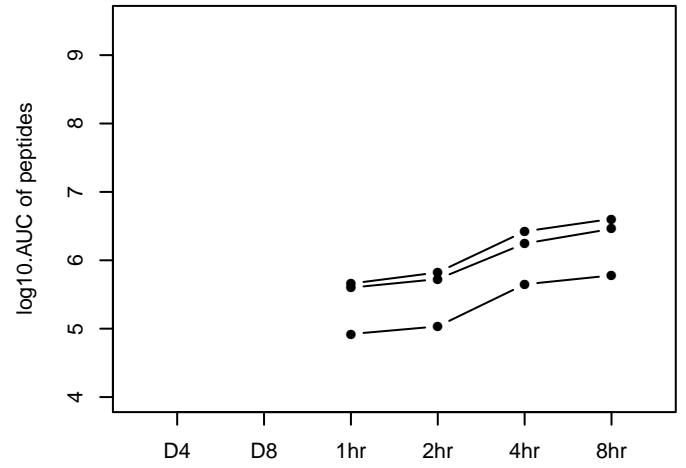



### ZEB1\_HUMAN

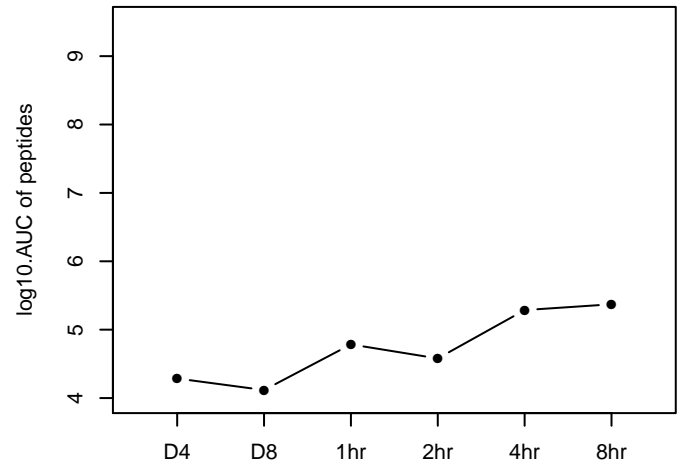

### ZF161\_HUMAN

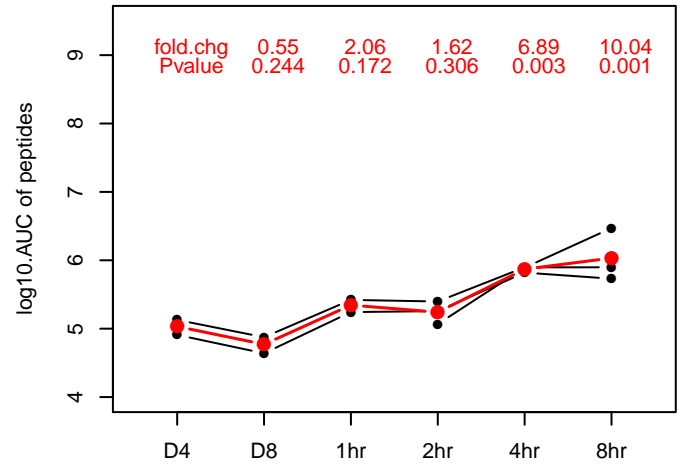

### ZFY19\_HUMAN

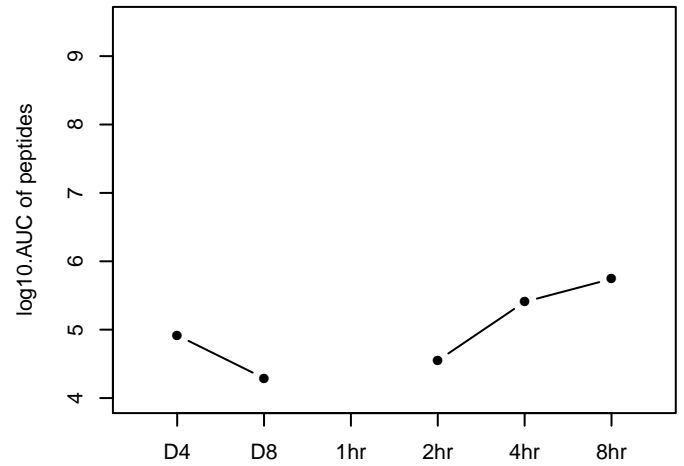

### ZFYV1\_HUMAN

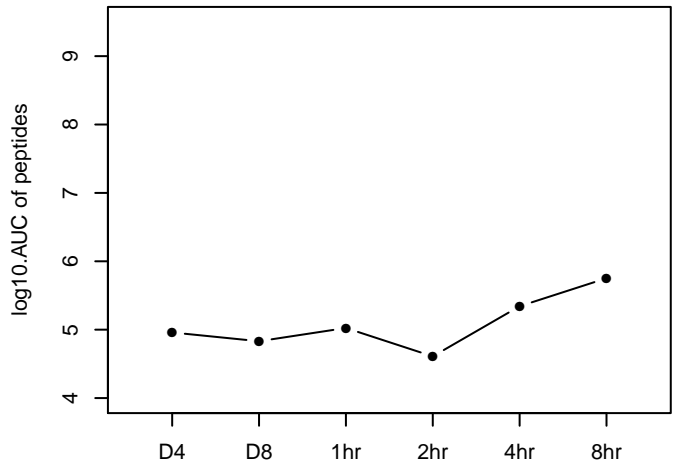

### ZMYM1\_HUMAN

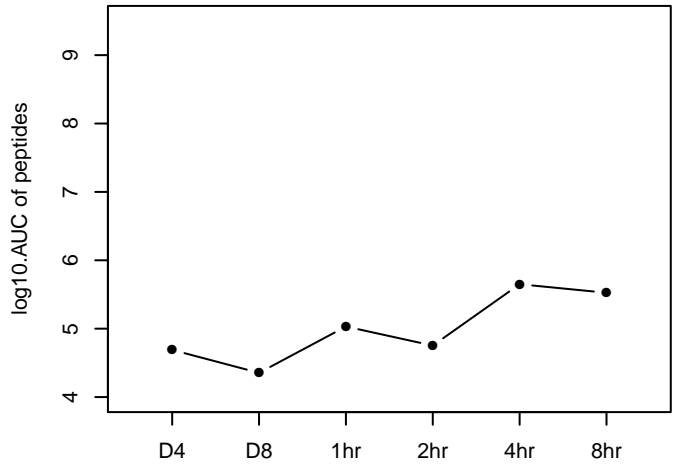

### ZMYM4\_HUMAN

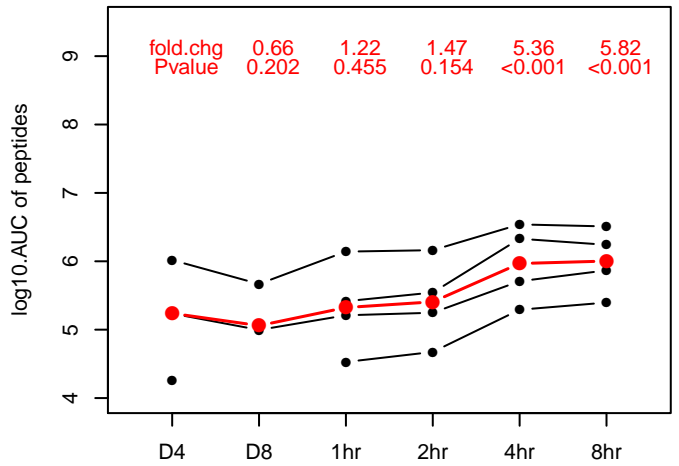

### ZN192\_HUMAN

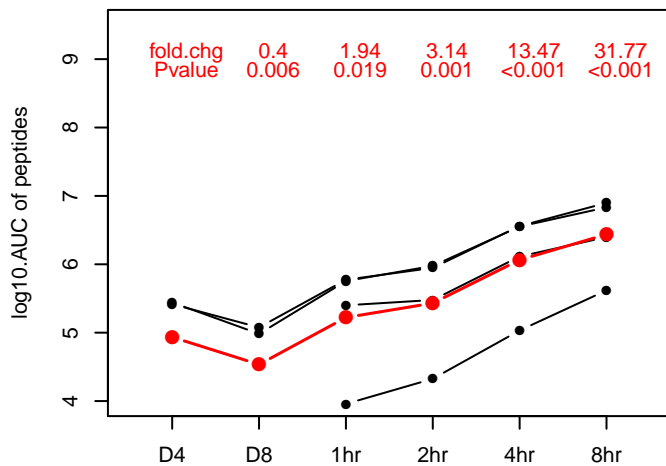

### ZN207\_HUMAN

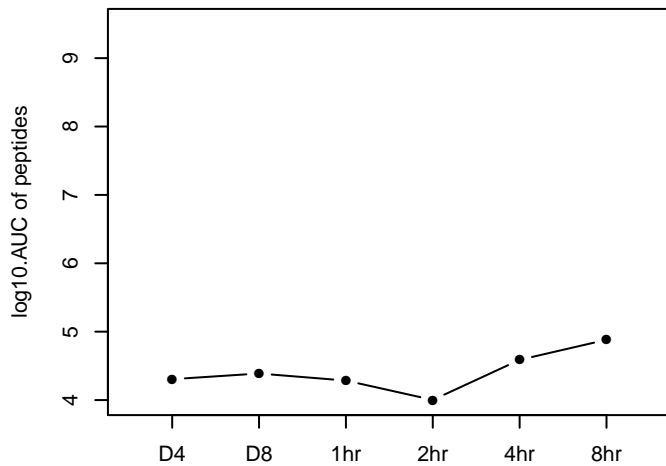

### ZN281\_HUMAN

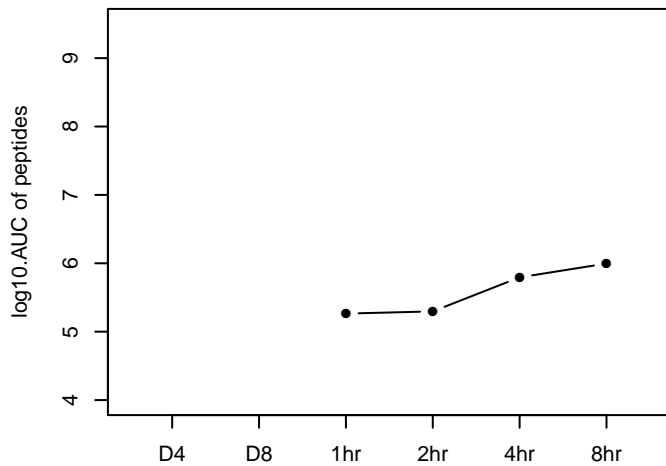

### ZN462\_HUMAN

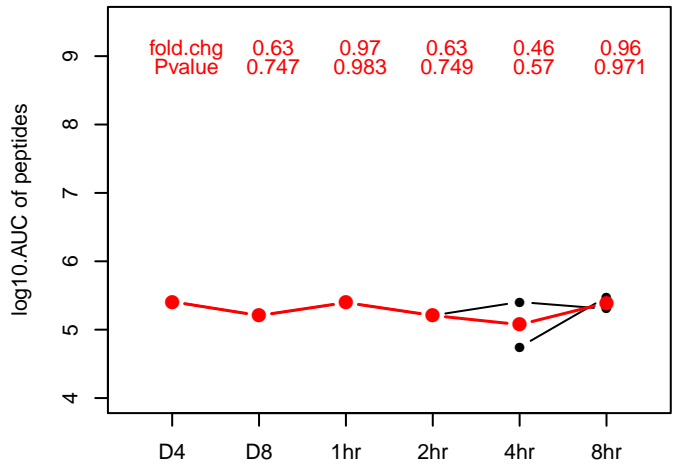

### ZN623\_HUMAN

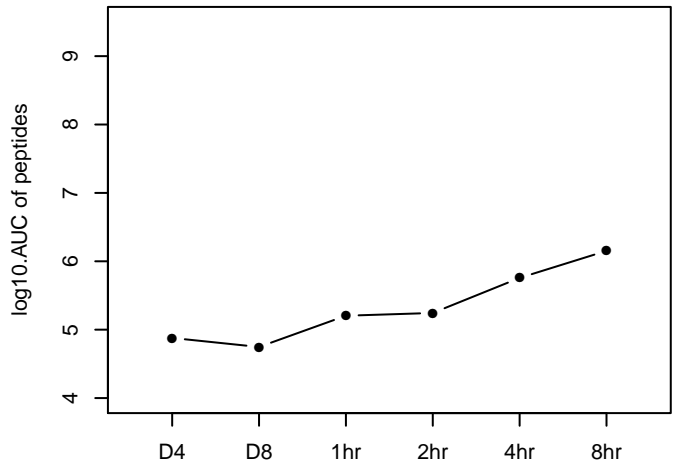

### ZN692\_HUMAN

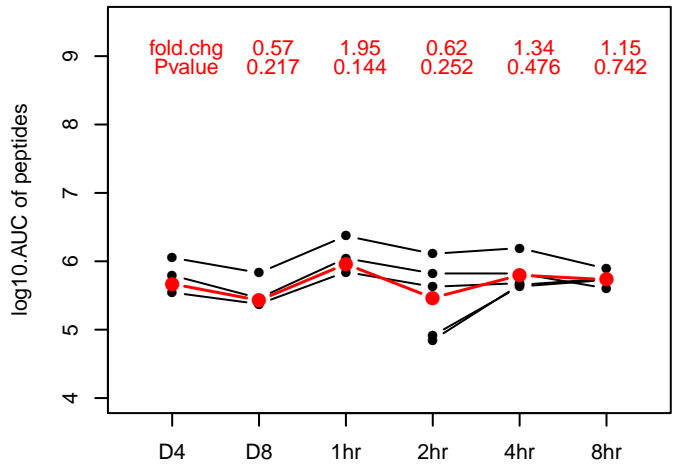

**ZN828\_HUMAN**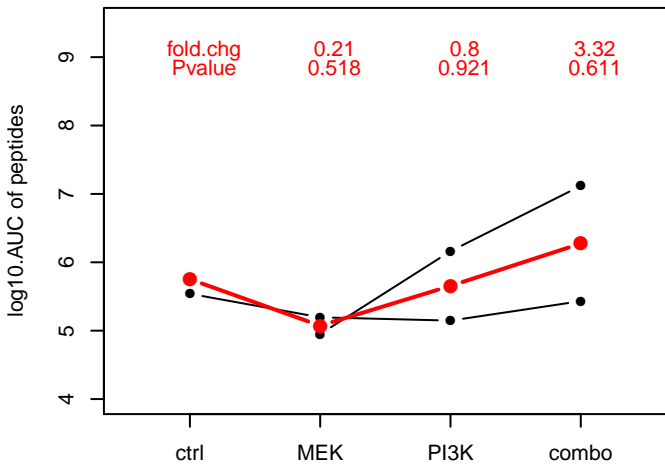**ZN828\_HUMAN**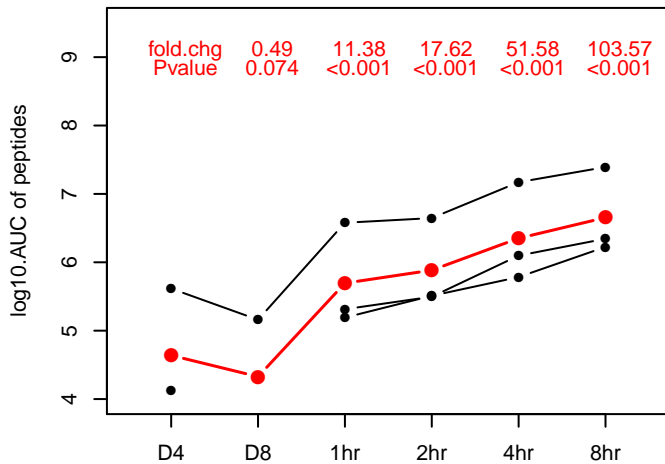**ZPR1\_HUMAN**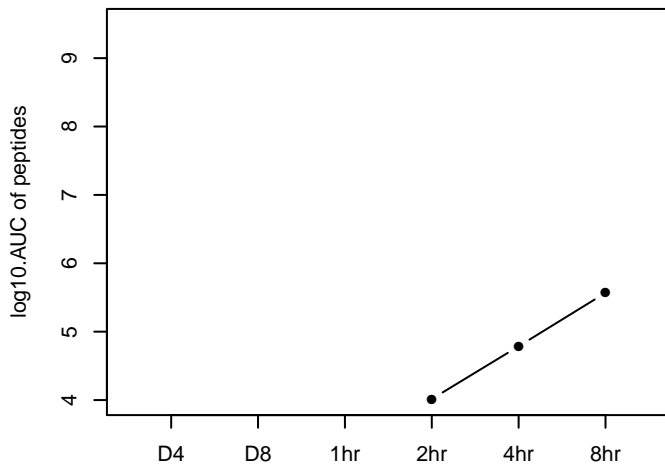**ZSC21\_HUMAN**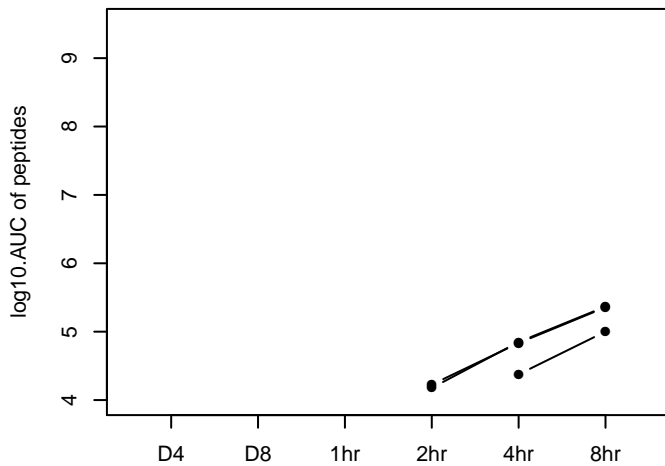

### ##MUC16\_HUMAN

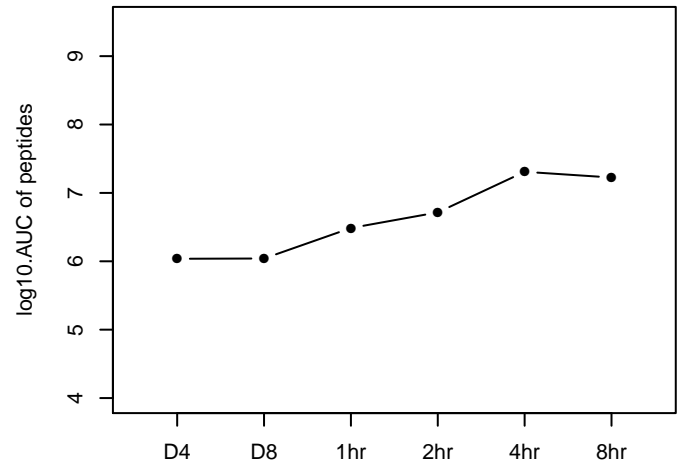

### ##PRKDC\_HUMAN

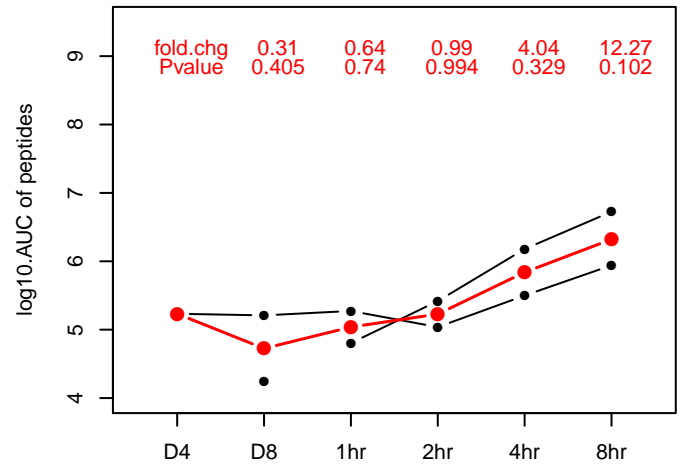

Supplement: 1309473110_sd02.pdf [file 1309473110_sd02.pdf]
