# Supplementary material
Source: PubMed Central journal article supplement (PMC3845176)
Supplement: 1309473110_sd01.pdf [file 1309473110_sd01.pdf]

pub\_ALLDATA\_MEK\_PI3K [s/t]Qmotif proteins

| Identifier  | Reference   | Description (UniProt)                                            | Gene (UniProt) |                          | ctrl                    | MEKi                    | PI3Ki                   | combo                   | ctrl_4hr                | combo_1hr               | combo_2hr               | combo_4hr               | combo_8hr               | ctrl_8hr                |
|-------------|-------------|------------------------------------------------------------------|----------------|--------------------------|-------------------------|-------------------------|-------------------------|-------------------------|-------------------------|-------------------------|-------------------------|-------------------------|-------------------------|-------------------------|
|             |             |                                                                  |                |                          | Total (Unique) Peptides |
| G3P_HUMAN   | G3P_HUMAN   | Glyceraldehyde-3-phosphate dehydrogenase                         | GAPDH          | <input type="checkbox"/> | 82 (26)                 | 95 (22)                 | 300 (26)                | 89 (23)                 | 74 (25)                 | 79 (25)                 | 60 (21)                 | 76 (27)                 | 72 (26)                 | 58 (23)                 |
| DCK_HUMAN   | DCK_HUMAN   | Deoxycytidine kinase                                             | DCK            | <input type="checkbox"/> | 13 (2)                  | 14 (3)                  | 35 (5)                  | 47 (8)                  | 18 (5)                  | 116 (15)                | 117 (15)                | 158 (16)                | 164 (15)                | 34 (6)                  |
| PRKDC_HUMAN | PRKDC_HUMAN | DNA-dependent protein kinase catalytic subunit                   | PRKDC          | <input type="checkbox"/> | 0 (0)                   | 2 (1)                   | 14 (7)                  | 60 (21)                 | 17 (6)                  | 24 (10)                 | 42 (16)                 | 77 (31)                 | 96 (36)                 | 21 (8)                  |
| SMCA4_HUMAN | SMCA4_HUMAN | Transcription activator BRG1                                     | SMARCA4        | <input type="checkbox"/> | 20 (11)                 | 24 (15)                 | 40 (24)                 | 35 (16)                 | 28 (16)                 | 46 (23)                 | 28 (20)                 | 34 (22)                 | 35 (20)                 | 25 (13)                 |
| LMNA_HUMAN  | LMNA_HUMAN  | Prelamin-A/C                                                     | LMNA           | <input type="checkbox"/> | 3 (2)                   | 1 (1)                   | 8 (4)                   | 8 (4)                   | 46 (18)                 | 66 (25)                 | 44 (24)                 | 45 (23)                 | 34 (15)                 | 46 (19)                 |
| NUCKS_HUMAN | NUCKS_HUMAN | Nuclear ubiquitoin casein and cyclin-dependent kinases substrate | NUCKS1         | <input type="checkbox"/> | 0 (0)                   | 1 (1)                   | 4 (4)                   | 18 (8)                  | 10 (4)                  | 21 (7)                  | 46 (10)                 | 79 (18)                 | 83 (13)                 | 10 (4)                  |
| MCM2_HUMAN  | MCM2_HUMAN  | DNA replication licensing factor MCM2                            | MCM2           | <input type="checkbox"/> | 1 (1)                   | 1 (1)                   | 0 (0)                   | 19 (1)                  | 23 (1)                  | 43 (3)                  | 42 (3)                  | 42 (2)                  | 72 (4)                  | 23 (1)                  |
| UBXN7_HUMAN | UBXN7_HUMAN | UBX domain-containing protein 7                                  | UBXN7          | <input type="checkbox"/> | 10 (3)                  | 10 (3)                  | 31 (2)                  | 35 (4)                  | 21 (4)                  | 35 (2)                  | 44 (3)                  | 33 (6)                  | 22 (4)                  | 20 (3)                  |
| TP53B_HUMAN | TP53B_HUMAN | Tumor suppressor p53-binding protein 1                           | TP53BP1        | <input type="checkbox"/> | 3 (2)                   | 3 (2)                   | 11 (5)                  | 18 (13)                 | 31 (16)                 | 38 (26)                 | 32 (20)                 | 43 (27)                 | 41 (26)                 | 22 (13)                 |
| VIME_HUMAN  | VIME_HUMAN  | Vimentin                                                         | VIM            | <input type="checkbox"/> | 32 (7)                  | 29 (5)                  | 26 (4)                  | 24 (3)                  | 22 (4)                  | 23 (5)                  | 23 (6)                  | 19 (4)                  | 16 (3)                  | 26 (8)                  |
| EPS8_HUMAN  | EPS8_HUMAN  | Epidermal growth factor receptor kinase substrate 8              | EPS8           | <input type="checkbox"/> | 17 (4)                  | 16 (4)                  | 21 (4)                  | 24 (5)                  | 25 (6)                  | 31 (7)                  | 28 (6)                  | 26 (6)                  | 26 (6)                  | 19 (6)                  |
| NEP_HUMAN   | NEP_HUMAN   | Neprilysin                                                       | MME            | <input type="checkbox"/> | 17 (6)                  | 14 (4)                  | 14 (5)                  | 14 (6)                  | 25 (8)                  | 22 (6)                  | 23 (8)                  | 19 (7)                  | 18 (7)                  | 20 (6)                  |
| LARP1_HUMAN | LARP1_HUMAN | La-related protein 1                                             | LARP1          | <input type="checkbox"/> | 10 (5)                  | 3 (2)                   | 9 (7)                   | 9 (6)                   | 32 (15)                 | 21 (6)                  | 14 (7)                  | 22 (13)                 | 18 (7)                  | 34 (15)                 |
| CTSL2_HUMAN | CTSL2_HUMAN | CTD small phosphatase-like protein 2                             | CTDSPL2        | <input type="checkbox"/> | 13 (2)                  | 5 (2)                   | 12 (2)                  | 11 (2)                  | 23 (6)                  | 17 (5)                  | 17 (5)                  | 23 (7)                  | 24 (6)                  | 21 (5)                  |
| SMG1_HUMAN  | SMG1_HUMAN  | Serine/threonine-protein kinase SMG1                             | SMG1           | <input type="checkbox"/> | 12 (3)                  | 11 (2)                  | 23 (3)                  | 22 (3)                  | 14 (5)                  | 16 (6)                  | 13 (6)                  | 18 (6)                  | 9 (3)                   | 17 (6)                  |
| TCAL3_HUMAN | TCAL3_HUMAN | Transcription elongation factor A protein-like 3                 | TCEAL3         | <input type="checkbox"/> | 2 (1)                   | 0 (0)                   | 3 (2)                   | 6 (2)                   | 11 (4)                  | 21 (5)                  | 25 (4)                  | 32 (7)                  | 36 (8)                  | 12 (3)                  |
| RAI14_HUMAN | RAI14_HUMAN | Ankyrin                                                          | RAI14          | <input type="checkbox"/> | 2 (1)                   | 2 (1)                   | 2 (1)                   | 2 (1)                   | 25 (12)                 | 24 (12)                 | 27 (12)                 | 21 (12)                 | 18 (10)                 | 25 (10)                 |
| 4EBP1_HUMAN | 4EBP1_HUMAN | Eukaryotic translation initiation factor 4E-binding protein 1    | EIF4EBP1       | <input type="checkbox"/> | 12 (4)                  | 10 (3)                  | 7 (3)                   | 19 (6)                  | 13 (4)                  | 12 (4)                  | 16 (6)                  | 20 (7)                  | 28 (11)                 | 9 (3)                   |
| NUMA1_HUMAN | NUMA1_HUMAN | Nuclear mitotic apparatus protein 1                              | NUMA1          | <input type="checkbox"/> | 4 (3)                   | 3 (3)                   | 6 (5)                   | 16 (8)                  | 12 (5)                  | 15 (6)                  | 23 (8)                  | 26 (12)                 | 24 (10)                 | 11 (5)                  |
| OSB11_HUMAN | OSB11_HUMAN | Oxysterol-binding protein-related protein 11                     | OSBPL11        | <input type="checkbox"/> | 10 (1)                  | 7 (1)                   | 12 (1)                  | 16 (1)                  | 18 (4)                  | 17 (4)                  | 15 (4)                  | 15 (3)                  | 17 (4)                  | 14 (3)                  |
| HMGA1_HUMAN | HMGA1_HUMAN | High mobility group protein HMG-I/HMG-Y                          | HMGA1          | <input type="checkbox"/> | 0 (0)                   | 0 (0)                   | 15 (2)                  | 24 (3)                  | 4 (2)                   | 15 (4)                  | 19 (3)                  | 25 (4)                  | 31 (5)                  | 3 (2)                   |
| NLK_HUMAN   | NLK_HUMAN   | Serine/threonine-protein kinase NLK                              | NLK            | <input type="checkbox"/> | 12 (3)                  | 9 (3)                   | 9 (2)                   | 9 (2)                   | 18 (7)                  | 20 (9)                  | 17 (7)                  | 16 (7)                  | 10 (5)                  | 16 (6)                  |
| LASP1_HUMAN | LASP1_HUMAN | LIM and SH3 domain protein 1                                     | LASP1          | <input type="checkbox"/> | 3 (2)                   | 2 (2)                   | 19 (5)                  | 46 (7)                  | 8 (4)                   | 11 (5)                  | 8 (5)                   | 15 (7)                  | 18 (7)                  | 5 (4)                   |
| ICLN_HUMAN  | ICLN_HUMAN  | Methylosome subunit pICln                                        | CLNS1A         | <input type="checkbox"/> | 6 (6)                   | 12 (7)                  | 3 (3)                   | 5 (3)                   | 25 (12)                 | 12 (7)                  | 17 (8)                  | 20 (11)                 | 20 (14)                 | 14 (7)                  |
| TMSL3_HUMAN | TMSL3_HUMAN | Thymosin beta-4-like protein 3                                   | TMSL3          | <input type="checkbox"/> | 1 (1)                   | 3 (2)                   | 6 (2)                   | 13 (4)                  | 14 (5)                  | 25 (4)                  | 22 (5)                  | 17 (4)                  | 21 (4)                  | 12 (4)                  |
| E41L3_HUMAN | E41L3_HUMAN | Band 4.1-like protein 3                                          | EPB41L3        | <input type="checkbox"/> | 8 (2)                   | 5 (2)                   | 10 (2)                  | 9 (2)                   | 13 (4)                  | 21 (7)                  | 19 (7)                  | 20 (6)                  | 15 (5)                  | 10 (4)                  |
| CE170_HUMAN | CE170_HUMAN | Centrosomal protein of 170 kDa                                   | CEP170         | <input type="checkbox"/> | 9 (4)                   | 10 (6)                  | 10 (5)                  | 6 (2)                   | 9 (5)                   | 26 (14)                 | 16 (8)                  | 17 (10)                 | 11 (6)                  | 8 (6)                   |
| MST4_HUMAN  | MST4_HUMAN  | Serine/threonine-protein kinase MST4                             | MST4           | <input type="checkbox"/> | 9 (3)                   | 7 (2)                   | 10 (2)                  | 26 (5)                  | 7 (3)                   | 7 (3)                   | 8 (4)                   | 12 (3)                  | 25 (6)                  | 10 (4)                  |
| SMC1A_HUMAN | SMC1A_HUMAN | Structural maintenance of chromosomes protein 1A                 | SMC1A          | <input type="checkbox"/> | 4 (3)                   | 5 (4)                   | 6 (5)                   | 12 (7)                  | 9 (6)                   | 14 (7)                  | 16 (10)                 | 21 (9)                  | 20 (9)                  | 8 (4)                   |
| SMCA2_HUMAN | SMCA2_HUMAN | Probable global transcription activator SNF2L2                   | SMARCA2        | <input type="checkbox"/> | 0 (0)                   | 1 (1)                   | 5 (5)                   | 12 (8)                  | 10 (7)                  | 14 (8)                  | 15 (11)                 | 21 (11)                 | 27 (15)                 | 5 (4)                   |
| NEST_HUMAN  | NEST_HUMAN  | Nestin                                                           | NES            | <input type="checkbox"/> | 0 (0)                   | 0 (0)                   | 3 (1)                   | 7 (3)                   | 13 (4)                  | 10 (5)                  | 12 (5)                  | 26 (10)                 | 27 (8)                  | 10 (5)                  |
| LMO7_HUMAN  | LMO7_HUMAN  | LIM domain only protein 7                                        | LMO7           | <input type="checkbox"/> | 6 (2)                   | 6 (3)                   | 6 (2)                   | 7 (2)                   | 12 (8)                  | 12 (6)                  | 16 (8)                  | 15 (7)                  | 12 (7)                  | 11 (6)                  |
| USS1_HUMAN  | USS1_HUMAN  | 116 kDa U5 small nuclear ribonucleoprotein component             | EFTUD2         | <input type="checkbox"/> | 5 (3)                   | 9 (3)                   | 10 (3)                  | 13 (2)                  | 8 (3)                   | 13 (3)                  | 14 (4)                  | 15 (4)                  | 13 (4)                  | 7 (2)                   |
| RBP2_HUMAN  | RBP2_HUMAN  | E3 SUMO-protein ligase RanBP2                                    | RANBP2         | <input type="checkbox"/> | 1 (1)                   | 1 (1)                   | 4 (1)                   | 5 (4)                   | 14 (9)                  | 20 (12)                 | 18 (10)                 | 15 (9)                  | 13 (7)                  | 13 (7)                  |
| IRS2_HUMAN  | IRS2_HUMAN  | Insulin receptor substrate 2                                     | IRS2           | <input type="checkbox"/> | 11 (4)                  | 9 (4)                   | 11 (4)                  | 10 (3)                  | 8 (3)                   | 9 (3)                   | 8 (4)                   | 12 (3)                  | 12 (4)                  | 12 (4)                  |
| AKA12_HUMAN | AKA12_HUMAN | A-kinase anchor protein 12                                       | AKAP12         | <input type="checkbox"/> | 0 (0)                   | 0 (0)                   | 9 (3)                   | 6 (2)                   | 10 (3)                  | 18 (5)                  | 19 (6)                  | 17 (6)                  | 16 (5)                  | 5 (2)                   |
| CR025_HUMAN | CR025_HUMAN | Uncharacterized protein C18orf25                                 | C18orf25       | <input type="checkbox"/> | 11 (4)                  | 9 (4)                   | 10 (3)                  | 9 (5)                   | 10 (6)                  | 8 (6)                   | 9 (6)                   | 8 (3)                   | 11 (7)                  | 9 (6)                   |
| NASP_HUMAN  | NASP_HUMAN  | Nuclear autoantigenic sperm protein                              | NASP           | <input type="checkbox"/> | 0 (0)                   | 0 (0)                   | 0 (0)                   | 2 (2)                   | 10 (4)                  | 12 (5)                  | 14 (7)                  | 21 (10)                 | 29 (11)                 | 3 (3)                   |
| HUWE1_HUMAN | HUWE1_HUMAN | E3 ubiquitin-protein ligase HUWE1                                | HUWE1          | <input type="checkbox"/> | 3 (1)                   | 4 (2)                   | 5 (3)                   | 6 (3)                   | 6 (5)                   | 10 (6)                  | 11 (8)                  | 18 (10)                 | 16 (11)                 | 10 (6)                  |

|              |              |                                                              |          |   |        |        |        |        |        |         |         |         |         |         |
|--------------|--------------|--------------------------------------------------------------|----------|---|--------|--------|--------|--------|--------|---------|---------|---------|---------|---------|
| IF2B_HUMAN   | IF2B_HUMAN   | Eukaryotic translation initiation factor 2 subunit 2         | EIF2S2   | ☐ | 0 (0)  | 0 (0)  | 0 (0)  | 0 (0)  | 6 (4)  | 10 (5)  | 9 (4)   | 27 (16) | 30 (15) | 9 (3)   |
| YAF2_HUMAN   | YAF2_HUMAN   | YY1-associated factor 2                                      | YAF2     | ☐ | 6 (2)  | 4 (2)  | 7 (2)  | 13 (3) | 19 (3) | 9 (3)   | 8 (3)   | 10 (3)  | 13 (3)  | 9 (1)   |
| KIF13B_HUMAN | KIF13B_HUMAN | Kinesin-like protein KIF13B                                  | KIF13B   | ☐ | 6 (2)  | 7 (2)  | 9 (2)  | 7 (2)  | 10 (4) | 9 (3)   | 10 (3)  | 8 (3)   | 8 (3)   | 10 (3)  |
| IF4B_HUMAN   | IF4B_HUMAN   | Eukaryotic translation initiation factor 4B                  | EIF4B    | ☐ | 3 (2)  | 0 (0)  | 3 (1)  | 0 (0)  | 24 (8) | 11 (9)  | 7 (5)   | 7 (5)   | 8 (7)   | 30 (11) |
| FUBP2_HUMAN  | FUBP2_HUMAN  | Far upstream element-binding protein 2                       | KHSRP    | ☐ | 4 (3)  | 4 (3)  | 5 (5)  | 15 (8) | 8 (6)  | 6 (6)   | 4 (2)   | 14 (7)  | 16 (11) | 4 (4)   |
| TOIP1_HUMAN  | TOIP1_HUMAN  | Torsin-1A-interacting protein 1                              | TOR1AIP1 | ☐ | 2 (1)  | 2 (1)  | 3 (2)  | 6 (4)  | 8 (6)  | 6 (4)   | 13 (10) | 14 (9)  | 20 (12) | 5 (3)   |
| ZBTB2_HUMAN  | ZBTB2_HUMAN  | Zinc finger and BTB domain-containing protein 2              | ZBTB2    | ☐ | 0 (0)  | 1 (1)  | 2 (1)  | 5 (3)  | 13 (7) | 18 (7)  | 11 (4)  | 12 (5)  | 9 (3)   | 7 (5)   |
| CENPL_HUMAN  | CENPL_HUMAN  | Centromere protein L                                         | CENPL    | ☐ | 5 (2)  | 5 (1)  | 3 (2)  | 5 (2)  | 13 (5) | 12 (4)  | 12 (3)  | 5 (2)   | 8 (2)   | 10 (4)  |
| ACINU_HUMAN  | ACINU_HUMAN  | Apoptotic chromatin condensation inducer in the nucleus      | ACIN1    | ☐ | 2 (1)  | 5 (2)  | 9 (3)  | 9 (4)  | 4 (1)  | 6 (4)   | 6 (3)   | 15 (9)  | 17 (8)  | 4 (1)   |
| NUCL_HUMAN   | NUCL_HUMAN   | Nucleolin                                                    | NCL      | ☐ | 0 (0)  | 1 (1)  | 6 (1)  | 13 (4) | 3 (2)  | 4 (2)   | 9 (4)   | 15 (5)  | 21 (7)  | 2 (1)   |
| SMC3_HUMAN   | SMC3_HUMAN   | Structural maintenance of chromosomes protein 3              | SMC3     | ☐ | 1 (1)  | 3 (2)  | 1 (1)  | 7 (5)  | 10 (5) | 10 (5)  | 8 (4)   | 9 (5)   | 15 (6)  | 7 (4)   |
| BOD1L_HUMAN  | BOD1L_HUMAN  | Biorientation of chromosomes in cell division protein 1-like | BOD1L    | ☐ | 3 (2)  | 6 (2)  | 4 (2)  | 10 (3) | 7 (3)  | 8 (4)   | 10 (5)  | 9 (5)   | 9 (4)   | 4 (2)   |
| SNX17_HUMAN  | SNX17_HUMAN  | Sorting nexin-17                                             | SNX17    | ☐ | 4 (2)  | 4 (2)  | 2 (1)  | 4 (2)  | 12 (5) | 15 (6)  | 6 (3)   | 7 (3)   | 9 (4)   | 7 (4)   |
| CLAP2_HUMAN  | CLAP2_HUMAN  | CLIP-associating protein 2                                   | CLASP2   | ☐ | 3 (2)  | 6 (2)  | 6 (4)  | 6 (2)  | 7 (3)  | 11 (7)  | 10 (3)  | 6 (3)   | 5 (2)   | 6 (5)   |
| VDAC1_HUMAN  | VDAC1_HUMAN  | Voltage-dependent anion-selective channel protein 1          | VDAC1    | ☐ | 0 (0)  | 0 (0)  | 2 (2)  | 3 (2)  | 10 (4) | 10 (4)  | 10 (4)  | 10 (5)  | 11 (5)  | 10 (4)  |
| VP26B_HUMAN  | VP26B_HUMAN  | Vacuolar protein sorting-associated protein 26B              | VPS26B   | ☐ | 2 (2)  | 2 (2)  | 9 (6)  | 4 (3)  | 6 (3)  | 11 (6)  | 10 (5)  | 9 (5)   | 8 (4)   | 9 (5)   |
| ALDOA_HUMAN  | ALDOA_HUMAN  | Fructose-bisphosphate aldolase A                             | ALDOA    | ☐ | 4 (1)  | 0 (0)  | 3 (1)  | 4 (1)  | 11 (4) | 12 (4)  | 7 (2)   | 9 (2)   | 6 (2)   | 10 (3)  |
| TSPY1_HUMAN  | TSPY1_HUMAN  | Testis-specific Y-encoded protein 1                          | TSPY1    | ☐ | 4 (2)  | 7 (4)  | 6 (3)  | 14 (4) | 5 (2)  | 7 (4)   | 7 (3)   | 6 (3)   | 5 (3)   | 4 (2)   |
| TOPBP1_HUMAN | TOPBP1_HUMAN | DNA topoisomerase 2-binding protein 1                        | TOPBP1   | ☐ | 1 (1)  | 2 (1)  | 2 (2)  | 0 (0)  | 11 (7) | 13 (10) | 12 (6)  | 11 (7)  | 7 (4)   | 6 (4)   |
| ADT1_HUMAN   | ADT1_HUMAN   | ADP/ATP translocase 1                                        | SLC25A4  | ☐ | 3 (2)  | 6 (2)  | 5 (2)  | 4 (2)  | 9 (3)  | 8 (3)   | 7 (3)   | 6 (3)   | 7 (3)   | 10 (4)  |
| CCNY_HUMAN   | CCNY_HUMAN   | Cyclin-Y                                                     | CCNY     | ☐ | 6 (4)  | 3 (3)  | 4 (2)  | 4 (2)  | 10 (6) | 7 (3)   | 10 (5)  | 8 (5)   | 5 (2)   | 9 (4)   |
| NGAP_HUMAN   | NGAP_HUMAN   | Ras GTPase-activating protein nGAP                           | RASAL2   | ☐ | 6 (5)  | 5 (4)  | 5 (3)  | 5 (3)  | 10 (5) | 8 (5)   | 8 (3)   | 5 (4)   | 4 (1)   | 9 (5)   |
| VAMP2_HUMAN  | VAMP2_HUMAN  | Vesicle-associated membrane protein 2                        | VAMP2    | ☐ | 3 (2)  | 4 (2)  | 5 (2)  | 9 (3)  | 5 (3)  | 5 (2)   | 7 (2)   | 6 (2)   | 12 (4)  | 6 (3)   |
| AFF4_HUMAN   | AFF4_HUMAN   | AF4/FMR2 family member 4                                     | AFF4     | ☐ | 17 (2) | 24 (3) | 6 (1)  | 3 (1)  | 3 (3)  | 1 (1)   | 0 (0)   | 2 (1)   | 2 (2)   | 4 (1)   |
| FANCI_HUMAN  | FANCI_HUMAN  | Fanconi anemia group I protein                               | FANCI    | ☐ | 4 (4)  | 3 (3)  | 2 (2)  | 3 (3)  | 9 (5)  | 8 (5)   | 8 (4)   | 8 (4)   | 8 (4)   | 9 (5)   |
| RBM15_HUMAN  | RBM15_HUMAN  | Putative RNA-binding protein 15                              | RBM15    | ☐ | 3 (2)  | 4 (1)  | 7 (3)  | 10 (3) | 6 (3)  | 4 (1)   | 6 (2)   | 6 (2)   | 10 (3)  | 4 (1)   |
| CKS1_HUMAN   | CKS1_HUMAN   | Cyclin-dependent kinases regulatory subunit 1                | CKS1B    | ☐ | 5 (3)  | 5 (3)  | 13 (4) | 12 (5) | 3 (3)  | 4 (3)   | 4 (3)   | 5 (3)   | 6 (3)   | 5 (3)   |
| NUP93_HUMAN  | NUP93_HUMAN  | Nuclear pore complex protein Nup93                           | NUP93    | ☐ | 2 (2)  | 4 (3)  | 4 (2)  | 5 (3)  | 7 (4)  | 10 (5)  | 8 (4)   | 7 (3)   | 8 (4)   | 5 (3)   |
| K1967_HUMAN  | K1967_HUMAN  | Protein KIAA1967                                             | KIAA1967 | ☐ | 0 (0)  | 1 (1)  | 3 (2)  | 6 (3)  | 0 (0)  | 3 (2)   | 6 (2)   | 10 (6)  | 30 (19) | 0 (0)   |
| PRS4_HUMAN   | PRS4_HUMAN   | 26S protease regulatory subunit 4                            | PSMC1    | ☐ | 1 (1)  | 0 (0)  | 3 (1)  | 2 (1)  | 9 (4)  | 10 (4)  | 8 (4)   | 9 (4)   | 9 (4)   | 9 (4)   |
| A8K968_HUMAN | A8K968_HUMAN | cDNA FLJ77757                                                | NULL     | ☐ | 3 (2)  | 2 (2)  | 1 (1)  | 1 (1)  | 10 (6) | 10 (5)  | 8 (5)   | 10 (5)  | 5 (3)   | 8 (4)   |
| HSP7C_HUMAN  | HSP7C_HUMAN  | Heat shock cognate 71 kDa protein                            | HSPA8    | ☐ | 2 (1)  | 0 (0)  | 4 (2)  | 5 (2)  | 8 (6)  | 7 (4)   | 9 (6)   | 10 (6)  | 8 (3)   | 6 (3)   |
| CLSPN_HUMAN  | CLSPN_HUMAN  | Claspin                                                      | CLSPN    | ☐ | 12 (5) | 9 (3)  | 8 (5)  | 3 (2)  | 6 (4)  | 6 (4)   | 4 (3)   | 2 (1)   | 3 (1)   | 4 (2)   |
| RIF1_HUMAN   | RIF1_HUMAN   | Telomere-associated protein RIF1                             | RIF1     | ☐ | 4 (2)  | 3 (2)  | 4 (1)  | 3 (1)  | 1 (1)  | 16 (7)  | 6 (4)   | 12 (7)  | 13 (7)  | 1 (1)   |
| NBEL2_HUMAN  | NBEL2_HUMAN  | Neurobeachin-like protein 2                                  | NBEAL2   | ☐ | 5 (2)  | 3 (2)  | 4 (2)  | 6 (2)  | 7 (3)  | 7 (4)   | 6 (2)   | 6 (3)   | 6 (2)   | 7 (3)   |
| CCD86_HUMAN  | CCD86_HUMAN  | Coiled-coil domain-containing protein 86                     | CCDC86   | ☐ | 4 (2)  | 5 (2)  | 6 (2)  | 9 (2)  | 4 (2)  | 5 (2)   | 6 (2)   | 6 (2)   | 8 (4)   | 4 (2)   |
| NHSL1_HUMAN  | NHSL1_HUMAN  | NHS-like protein 1                                           | NHSL1    | ☐ | 6 (3)  | 3 (3)  | 1 (1)  | 3 (2)  | 9 (5)  | 5 (1)   | 6 (1)   | 8 (3)   | 10 (3)  | 6 (2)   |
| MATR3_HUMAN  | MATR3_HUMAN  | Matrin-3                                                     | MATR3    | ☐ | 0 (0)  | 2 (1)  | 2 (2)  | 8 (3)  | 4 (1)  | 7 (4)   | 7 (4)   | 7 (3)   | 16 (8)  | 4 (1)   |
| MDC1_HUMAN   | MDC1_HUMAN   | Mediator of DNA damage checkpoint protein 1                  | MDC1     | ☐ | 1 (1)  | 2 (1)  | 2 (1)  | 4 (3)  | 8 (4)  | 7 (3)   | 9 (3)   | 7 (4)   | 10 (4)  | 7 (4)   |
| PP12C_HUMAN  | PP12C_HUMAN  | Protein phosphatase 1 regulatory subunit 12C                 | PPP1R12C | ☐ | 5 (2)  | 9 (2)  | 9 (2)  | 8 (2)  | 4 (1)  | 4 (1)   | 4 (1)   | 4 (1)   | 3 (2)   | 6 (3)   |
| RENT1_HUMAN  | RENT1_HUMAN  | Regulator of nonsense transcripts 1                          | UPF1     | ☐ | 4 (1)  | 4 (1)  | 4 (1)  | 4 (1)  | 8 (4)  | 6 (3)   | 5 (3)   | 6 (3)   | 5 (3)   | 7 (4)   |
| CD44_HUMAN   | CD44_HUMAN   | CD44 antigen                                                 | CD44     | ☐ | 6 (4)  | 1 (1)  | 4 (2)  | 4 (3)  | 6 (2)  | 6 (4)   | 8 (3)   | 7 (3)   | 6 (2)   | 5 (4)   |
| SVIL_HUMAN   | SVIL_HUMAN   | Supervillin                                                  | SVIL     | ☐ | 5 (2)  | 5 (2)  | 5 (2)  | 4 (2)  | 4 (1)  | 7 (3)   | 5 (2)   | 6 (3)   | 6 (3)   | 4 (1)   |
| MAGD2_HUMAN  | MAGD2_HUMAN  | Melanoma-associated antigen D2                               | MAGED2   | ☐ | 0 (0)  | 0 (0)  | 0 (0)  | 0 (0)  | 6 (3)  | 10 (5)  | 9 (6)   | 10 (6)  | 9 (5)   | 8 (5)   |
| GAGB1_HUMAN  | GAGB1_HUMAN  | G antigen family B member 1                                  | PAGE1    | ☐ | 0 (0)  | 0 (0)  | 2 (2)  | 2 (1)  | 7 (3)  | 11 (4)  | 8 (4)   | 7 (4)   | 8 (4)   | 8 (3)   |

|              |              |                                                                   |         |                          |       |       |       |       |       |        |       |        |         |       |
|--------------|--------------|-------------------------------------------------------------------|---------|--------------------------|-------|-------|-------|-------|-------|--------|-------|--------|---------|-------|
| DJB11_HUMAN  | DJB11_HUMAN  | DnaJ homolog subfamily B member 11                                | DNAJB11 | <input type="checkbox"/> | 0 (0) | 0 (0) | 0 (0) | 2 (1) | 9 (3) | 10 (3) | 8 (3) | 8 (3)  | 8 (3)   | 9 (2) |
| MOV10_HUMAN  | MOV10_HUMAN  | Putative helicase MOV-10                                          | MOV10   | <input type="checkbox"/> | 4 (3) | 4 (3) | 5 (3) | 2 (1) | 6 (2) | 6 (2)  | 6 (2) | 6 (3)  | 6 (2)   | 6 (3) |
| BCLF1_HUMAN  | BCLF1_HUMAN  | Bcl-2-associated transcription factor 1                           | BCLAF1  | <input type="checkbox"/> | 0 (0) | 0 (0) | 0 (0) | 1 (1) | 3 (3) | 6 (4)  | 9 (4) | 10 (5) | 19 (5)  | 3 (2) |
| NDC80_HUMAN  | NDC80_HUMAN  | Kinetochore protein NDC80 homolog                                 | NDC80   | <input type="checkbox"/> | 6 (5) | 5 (4) | 3 (2) | 1 (1) | 7 (5) | 6 (4)  | 3 (2) | 6 (3)  | 6 (3)   | 6 (5) |
| CDC26_HUMAN  | CDC26_HUMAN  | Anaphase-promoting complex subunit CDC26                          | CDC26   | <input type="checkbox"/> | 2 (2) | 3 (2) | 3 (2) | 6 (3) | 5 (3) | 7 (6)  | 4 (4) | 8 (5)  | 7 (4)   | 5 (3) |
| ENAH_HUMAN   | ENAH_HUMAN   | Protein enabled homolog                                           | ENAH    | <input type="checkbox"/> | 1 (1) | 2 (1) | 3 (1) | 4 (2) | 7 (3) | 6 (2)  | 7 (3) | 7 (3)  | 6 (2)   | 6 (2) |
| TANC2_HUMAN  | TANC2_HUMAN  | Protein TANC2                                                     | TANC2   | <input type="checkbox"/> | 4 (1) | 4 (1) | 3 (1) | 4 (2) | 4 (3) | 6 (3)  | 7 (3) | 7 (3)  | 6 (3)   | 7 (1) |
| PR38B_HUMAN  | PR38B_HUMAN  | Pre-mRNA-splicing factor 38B                                      | PRPF38B | <input type="checkbox"/> | 1 (1) | 1 (1) | 0 (0) | 0 (0) | 8 (4) | 8 (4)  | 6 (4) | 6 (3)  | 11 (5)  | 6 (2) |
| PAIRB_HUMAN  | PAIRB_HUMAN  | Plasminogen activator inhibitor 1 RNA-binding protein             | SERBP1  | <input type="checkbox"/> | 0 (0) | 2 (1) | 3 (1) | 6 (2) | 5 (2) | 6 (2)  | 6 (2) | 7 (3)  | 9 (4)   | 4 (1) |
| DHX9_HUMAN   | DHX9_HUMAN   | ATP-dependent RNA helicase A                                      | DHX9    | <input type="checkbox"/> | 2 (1) | 2 (1) | 6 (2) | 7 (2) | 6 (2) | 4 (2)  | 4 (2) | 6 (4)  | 6 (4)   | 3 (2) |
| LPIN1_HUMAN  | LPIN1_HUMAN  | Phosphatidate phosphatase LPIN1                                   | LPIN1   | <input type="checkbox"/> | 4 (2) | 1 (1) | 2 (2) | 2 (1) | 6 (4) | 6 (3)  | 5 (4) | 9 (4)  | 5 (3)   | 8 (5) |
| WDR26_HUMAN  | WDR26_HUMAN  | WD repeat-containing protein 26                                   | WDR26   | <input type="checkbox"/> | 1 (1) | 0 (0) | 3 (2) | 0 (0) | 6 (3) | 7 (3)  | 7 (3) | 6 (3)  | 8 (3)   | 7 (4) |
| SMAP_HUMAN   | SMAP_HUMAN   | Small acidic protein                                              | SMAP    | <input type="checkbox"/> | 0 (0) | 0 (0) | 0 (0) | 0 (0) | 8 (3) | 6 (2)  | 7 (3) | 10 (3) | 10 (4)  | 6 (2) |
| PKP4_HUMAN   | PKP4_HUMAN   | Plakophilin-4                                                     | PKP4    | <input type="checkbox"/> | 1 (1) | 0 (0) | 0 (0) | 1 (1) | 6 (4) | 9 (5)  | 9 (5) | 6 (5)  | 7 (4)   | 5 (5) |
| MYH10_HUMAN  | MYH10_HUMAN  | Myosin-10                                                         | MYH10   | <input type="checkbox"/> | 2 (1) | 2 (1) | 2 (1) | 2 (1) | 6 (2) | 6 (2)  | 6 (2) | 6 (3)  | 6 (2)   | 6 (2) |
| LYST_HUMAN   | LYST_HUMAN   | Lysosomal-trafficking regulator                                   | LYST    | <input type="checkbox"/> | 0 (0) | 0 (0) | 4 (2) | 4 (2) | 2 (1) | 9 (3)  | 9 (3) | 8 (2)  | 7 (2)   | 7 (1) |
| UACA_HUMAN   | UACA_HUMAN   | Uveal autoantigen with coiled-coil domains and ankyrin repeats    | UACA    | <input type="checkbox"/> | 2 (1) | 2 (1) | 2 (1) | 4 (1) | 6 (2) | 4 (1)  | 6 (2) | 5 (2)  | 6 (2)   | 5 (2) |
| S12A2_HUMAN  | S12A2_HUMAN  | Solute carrier family 12 member 2                                 | SLC12A2 | <input type="checkbox"/> | 0 (0) | 0 (0) | 0 (0) | 0 (0) | 7 (2) | 9 (4)  | 7 (2) | 8 (2)  | 7 (2)   | 6 (2) |
| SPTB2_HUMAN  | SPTB2_HUMAN  | Spectrin beta chain, brain 1                                      | SPTBN1  | <input type="checkbox"/> | 0 (0) | 0 (0) | 1 (1) | 0 (0) | 6 (2) | 10 (4) | 6 (3) | 7 (3)  | 6 (4)   | 5 (3) |
| CALX_HUMAN   | CALX_HUMAN   | Calnexin                                                          | CANX    | <input type="checkbox"/> | 0 (0) | 0 (0) | 0 (0) | 0 (0) | 6 (4) | 7 (5)  | 8 (5) | 9 (5)  | 7 (4)   | 6 (4) |
| LRC41_HUMAN  | LRC41_HUMAN  | Leucine-rich repeat-containing protein 41                         | LRRC41  | <input type="checkbox"/> | 2 (1) | 0 (0) | 2 (1) | 2 (1) | 4 (2) | 4 (2)  | 6 (3) | 10 (3) | 10 (7)  | 3 (1) |
| AT133_HUMAN  | AT133_HUMAN  | Probable cation-transporting ATPase 13A3                          | ATP13A3 | <input type="checkbox"/> | 1 (1) | 1 (1) | 0 (0) | 0 (0) | 9 (5) | 6 (2)  | 5 (3) | 5 (3)  | 6 (3)   | 9 (6) |
| PMS2_HUMAN   | PMS2_HUMAN   | Mismatch repair endonuclease PMS2                                 | PMS2    | <input type="checkbox"/> | 0 (0) | 1 (1) | 0 (0) | 1 (1) | 5 (2) | 4 (2)  | 4 (2) | 13 (5) | 10 (4)  | 4 (2) |
| WDR7_HUMAN   | WDR7_HUMAN   | WD repeat-containing protein 7                                    | WDR7    | <input type="checkbox"/> | 3 (1) | 5 (1) | 3 (2) | 2 (1) | 7 (2) | 4 (1)  | 4 (1) | 4 (1)  | 4 (1)   | 5 (1) |
| TYB10_HUMAN  | TYB10_HUMAN  | Thymosin beta-10                                                  | TMSB10  | <input type="checkbox"/> | 0 (0) | 0 (0) | 0 (0) | 2 (2) | 7 (2) | 10 (4) | 7 (3) | 6 (3)  | 4 (2)   | 5 (3) |
| POP1_HUMAN   | POP1_HUMAN   | Ribonucleases P/MRP protein subunit POP1                          | POP1    | <input type="checkbox"/> | 0 (0) | 2 (1) | 3 (3) | 6 (5) | 0 (0) | 4 (3)  | 5 (3) | 6 (5)  | 10 (5)  | 0 (0) |
| GTR1_HUMAN   | GTR1_HUMAN   | Solute carrier family 2, facilitated glucose transporter member 1 | SLC2A1  | <input type="checkbox"/> | 3 (1) | 3 (1) | 2 (1) | 7 (3) | 3 (2) | 3 (2)  | 4 (2) | 6 (4)  | 6 (5)   | 1 (1) |
| CSN1_HUMAN   | CSN1_HUMAN   | COP9 signalosome complex subunit 1                                | GPS1    | <input type="checkbox"/> | 5 (1) | 2 (1) | 5 (1) | 4 (1) | 1 (1) | 6 (4)  | 5 (4) | 4 (3)  | 8 (6)   | 1 (1) |
| PLCD3_HUMAN  | PLCD3_HUMAN  | 1-phosphatidylinositol-4,5-bisphosphate phosphodiesterase delta-3 | PLCD3   | <input type="checkbox"/> | 4 (1) | 3 (1) | 2 (1) | 2 (1) | 4 (2) | 5 (2)  | 5 (2) | 3 (2)  | 5 (2)   | 8 (2) |
| TM100_HUMAN  | TM100_HUMAN  | Transmembrane protein 100                                         | TMEM100 | <input type="checkbox"/> | 0 (0) | 0 (0) | 0 (0) | 1 (1) | 7 (3) | 4 (2)  | 5 (3) | 7 (3)  | 12 (6)  | 5 (3) |
| KI67_HUMAN   | KI67_HUMAN   | Antigen KI-67                                                     | MKI67   | <input type="checkbox"/> | 0 (0) | 0 (0) | 0 (0) | 2 (2) | 3 (1) | 1 (1)  | 4 (3) | 6 (6)  | 19 (16) | 3 (3) |
| UBP40_HUMAN  | UBP40_HUMAN  | Ubiquitin carboxyl-terminal hydrolase 40                          | USP40   | <input type="checkbox"/> | 4 (2) | 0 (0) | 4 (2) | 3 (1) | 5 (2) | 6 (1)  | 6 (1) | 5 (1)  | 5 (2)   | 4 (1) |
| SPS2L_HUMAN  | SPS2L_HUMAN  | SPATS2-like protein                                               | SPATS2L | <input type="checkbox"/> | 0 (0) | 1 (1) | 2 (1) | 2 (1) | 6 (3) | 5 (2)  | 4 (3) | 5 (2)  | 6 (3)   | 6 (2) |
| AT1A1_HUMAN  | AT1A1_HUMAN  | Sodium/potassium-transporting ATPase subunit alpha-1              | ATP1A1  | <input type="checkbox"/> | 2 (1) | 1 (1) | 4 (2) | 3 (2) | 4 (3) | 4 (3)  | 5 (3) | 5 (3)  | 4 (3)   | 6 (2) |
| ZC3HD_HUMAN  | ZC3HD_HUMAN  | Zinc finger CCHH domain-containing protein 13                     | ZC3H13  | <input type="checkbox"/> | 0 (0) | 0 (0) | 1 (1) | 1 (1) | 5 (3) | 5 (3)  | 7 (6) | 7 (4)  | 7 (4)   | 5 (3) |
| CDK9_HUMAN   | CDK9_HUMAN   | Cell division protein kinase 9                                    | CDK9    | <input type="checkbox"/> | 0 (0) | 0 (0) | 0 (0) | 0 (0) | 8 (4) | 8 (4)  | 4 (3) | 6 (5)  | 5 (3)   | 7 (4) |
| DBNL_HUMAN   | DBNL_HUMAN   | Drebrin-like protein                                              | DBNL    | <input type="checkbox"/> | 0 (0) | 0 (0) | 0 (0) | 0 (0) | 7 (3) | 5 (3)  | 6 (3) | 5 (2)  | 6 (3)   | 5 (2) |
| FKBP15_HUMAN | FKBP15_HUMAN | FK506-binding protein 15                                          | FKBP15  | <input type="checkbox"/> | 2 (1) | 2 (2) | 2 (2) | 1 (1) | 6 (3) | 8 (4)  | 5 (3) | 4 (3)  | 5 (2)   | 3 (2) |
| SFSWA_HUMAN  | SFSWA_HUMAN  | --                                                                | --      | <input type="checkbox"/> | 0 (0) | 0 (0) | 0 (0) | 4 (1) | 6 (5) | 4 (4)  | 5 (2) | 5 (2)  | 4 (1)   | 9 (7) |
| UBE2T_HUMAN  | UBE2T_HUMAN  | Ubiquitin-conjugating enzyme E2 T                                 | UBE2T   | <input type="checkbox"/> | 2 (1) | 2 (2) | 2 (1) | 3 (1) | 4 (2) | 6 (2)  | 4 (2) | 4 (2)  | 4 (2)   | 6 (2) |
| PRP8_HUMAN   | PRP8_HUMAN   | Pre-mRNA-processing-splicing factor 8                             | PRPF8   | <input type="checkbox"/> | 0 (0) | 0 (0) | 2 (1) | 9 (4) | 4 (2) | 2 (1)  | 4 (2) | 4 (2)  | 8 (5)   | 4 (3) |
| KPCD1_HUMAN  | KPCD1_HUMAN  | Serine/threonine-protein kinase D1                                | PRKD1   | <input type="checkbox"/> | 2 (1) | 2 (1) | 4 (2) | 1 (1) | 6 (3) | 5 (3)  | 3 (2) | 4 (1)  | 6 (2)   | 4 (2) |
| KAT7_HUMAN   | KAT7_HUMAN   | --                                                                | --      | <input type="checkbox"/> | 0 (0) | 0 (0) | 1 (1) | 1 (1) | 6 (3) | 5 (3)  | 4 (3) | 6 (2)  | 6 (3)   | 8 (4) |
| DBF4A_HUMAN  | DBF4A_HUMAN  | Protein DBF4 homolog A                                            | DBF4    | <input type="checkbox"/> | 0 (0) | 0 (0) | 1 (1) | 2 (1) | 7 (3) | 6 (3)  | 6 (3) | 6 (3)  | 5 (3)   | 4 (2) |

|             |             |                                                             |          |                          |       |       |       |       |       |       |       |        |        |       |
|-------------|-------------|-------------------------------------------------------------|----------|--------------------------|-------|-------|-------|-------|-------|-------|-------|--------|--------|-------|
| SDCB1_HUMAN | SDCB1_HUMAN | Syntenin-1                                                  | SDCBP    | <input type="checkbox"/> | 0 (0) | 0 (0) | 0 (0) | 2 (1) | 6 (2) | 7 (3) | 8 (2) | 6 (3)  | 4 (2)  | 3 (1) |
| DDX27_HUMAN | DDX27_HUMAN | Probable ATP-dependent RNA helicase DDX27                   | DDX27    | <input type="checkbox"/> | 0 (0) | 0 (0) | 1 (1) | 0 (0) | 6 (2) | 6 (2) | 6 (4) | 6 (5)  | 5 (2)  | 4 (1) |
| KPVM_HUMAN  | KPVM_HUMAN  | Pyruvate kinase isozymes M1/M2                              | PKM2     | <input type="checkbox"/> | 2 (1) | 2 (1) | 4 (1) | 2 (1) | 4 (1) | 4 (1) | 5 (2) | 4 (1)  | 5 (2)  | 4 (1) |
| FKBP5_HUMAN | FKBP5_HUMAN | Peptidyl-prolyl cis-trans isomerase FKBP5                   | FKBP5    | <input type="checkbox"/> | 0 (0) | 0 (0) | 1 (1) | 1 (3) | 4 (1) | 6 (3) | 6 (3) | 6 (2)  | 6 (3)  | 4 (3) |
| NADAP_HUMAN | NADAP_HUMAN | Kanadaplin                                                  | SLC4A1AP | <input type="checkbox"/> | 0 (0) | 0 (0) | 0 (0) | 0 (0) | 5 (3) | 5 (3) | 6 (4) | 9 (7)  | 7 (5)  | 3 (2) |
| OSB10_HUMAN | OSB10_HUMAN | Oxysterol-binding protein-related protein 10                | OSBPL10  | <input type="checkbox"/> | 3 (1) | 2 (1) | 4 (2) | 5 (2) | 2 (1) | 6 (3) | 5 (2) | 2 (1)  | 3 (1)  | 2 (1) |
| TBB2A_HUMAN | TBB2A_HUMAN | Tubulin beta-2A chain                                       | TUBB2A   | <input type="checkbox"/> | 3 (3) | 6 (5) | 5 (3) | 5 (2) | 2 (1) | 2 (1) | 2 (1) | 2 (1)  | 2 (1)  | 2 (1) |
| LAP2B_HUMAN | LAP2B_HUMAN | Lamina-associated polypeptide 2, isoforms beta/gamma        | TMPO     | <input type="checkbox"/> | 0 (0) | 0 (0) | 2 (2) | 6 (5) | 0 (0) | 3 (2) | 6 (2) | 5 (2)  | 6 (5)  | 2 (1) |
| SMG5_HUMAN  | SMG5_HUMAN  | Protein SMG5                                                | SMG5     | <input type="checkbox"/> | 4 (1) | 4 (1) | 1 (1) | 1 (1) | 4 (1) | 3 (1) | 3 (1) | 4 (1)  | 4 (1)  | 4 (1) |
| H2AX_HUMAN  | H2AX_HUMAN  | Histone H2A.x                                               | H2AFX    | <input type="checkbox"/> | 0 (0) | 0 (0) | 0 (0) | 1 (1) | 0 (0) | 2 (1) | 3 (2) | 11 (2) | 15 (3) | 2 (2) |
| RBCC1_HUMAN | RBCC1_HUMAN | RB1-inducible coiled-coil protein 1                         | RB1CC1   | <input type="checkbox"/> | 0 (0) | 0 (0) | 1 (1) | 0 (0) | 5 (4) | 8 (4) | 7 (4) | 5 (5)  | 5 (3)  | 3 (2) |
| PAXI_HUMAN  | PAXI_HUMAN  | Paxillin                                                    | PXN      | <input type="checkbox"/> | 0 (0) | 0 (0) | 0 (0) | 4 (2) | 4 (3) | 3 (3) | 2 (2) | 7 (4)  | 10 (4) | 4 (2) |
| CCNC_HUMAN  | CCNC_HUMAN  | Cyclin-C                                                    | CCNC     | <input type="checkbox"/> | 0 (0) | 0 (0) | 0 (0) | 2 (1) | 0 (0) | 4 (4) | 4 (4) | 11 (7) | 12 (9) | 0 (0) |
| FKBP4_HUMAN | FKBP4_HUMAN | Peptidyl-prolyl cis-trans isomerase FKBP4                   | FKBP4    | <input type="checkbox"/> | 1 (1) | 0 (0) | 2 (2) | 2 (1) | 4 (2) | 3 (1) | 4 (2) | 6 (2)  | 6 (2)  | 3 (2) |
| AFAD_HUMAN  | AFAD_HUMAN  | Afadin                                                      | MLLT4    | <input type="checkbox"/> | 6 (2) | 7 (3) | 3 (2) | 0 (0) | 7 (3) | 0 (0) | 3 (2) | 0 (0)  | 0 (0)  | 7 (3) |
| MIB1_HUMAN  | MIB1_HUMAN  | E3 ubiquitin-protein ligase MIB1                            | MIB1     | <input type="checkbox"/> | 4 (3) | 1 (1) | 0 (0) | 1 (2) | 2 (2) | 6 (3) | 2 (1) | 2 (2)  | 7 (5)  | 6 (3) |
| C8AP2_HUMAN | C8AP2_HUMAN | CASP8-associated protein 2                                  | CASP8AP2 | <input type="checkbox"/> | 2 (1) | 1 (1) | 1 (1) | 2 (2) | 4 (3) | 6 (4) | 4 (2) | 5 (4)  | 3 (2)  | 5 (3) |
| CAB45_HUMAN | CAB45_HUMAN | 45 kDa calcium-binding protein                              | SDF4     | <input type="checkbox"/> | 0 (0) | 0 (0) | 0 (0) | 1 (1) | 6 (3) | 5 (2) | 7 (3) | 5 (2)  | 5 (2)  | 4 (2) |
| PKHA3_HUMAN | PKHA3_HUMAN | Pleckstrin homology domain-containing family A member 3     | PLEKHA3  | <input type="checkbox"/> | 1 (1) | 1 (1) | 5 (2) | 4 (2) | 4 (2) | 3 (2) | 3 (2) | 3 (2)  | 5 (2)  | 3 (2) |
| MYPT2_HUMAN | MYPT2_HUMAN | Protein phosphatase 1 regulatory subunit 12B                | PPP1R12B | <input type="checkbox"/> | 2 (1) | 2 (1) | 2 (1) | 2 (2) | 4 (1) | 4 (1) | 4 (1) | 4 (2)  | 4 (1)  | 4 (1) |
| IRS1_HUMAN  | IRS1_HUMAN  | Insulin receptor substrate 1                                | IRS1     | <input type="checkbox"/> | 4 (3) | 2 (1) | 2 (1) | 2 (1) | 5 (4) | 4 (2) | 4 (3) | 3 (2)  | 2 (1)  | 4 (3) |
| SNUT1_HUMAN | SNUT1_HUMAN | U4/U6.U5 tri-snRNP-associated protein 1                     | SART1    | <input type="checkbox"/> | 2 (1) | 3 (2) | 2 (1) | 2 (1) | 4 (1) | 4 (2) | 4 (1) | 4 (2)  | 4 (1)  | 3 (1) |
| F120A_HUMAN | F120A_HUMAN | Constitutive coactivator of PPAR-gamma-like protein 1       | FAM120A  | <input type="checkbox"/> | 2 (1) | 3 (2) | 2 (1) | 2 (1) | 4 (2) | 4 (3) | 2 (1) | 5 (3)  | 4 (2)  | 4 (3) |
| PSF2_HUMAN  | PSF2_HUMAN  | DNA replication complex GINS protein PSF2                   | GINS2    | <input type="checkbox"/> | 1 (1) | 2 (1) | 2 (1) | 2 (2) | 0 (0) | 1 (1) | 4 (2) | 6 (3)  | 9 (3)  | 2 (2) |
| GPTC8_HUMAN | GPTC8_HUMAN | G patch domain-containing protein 8                         | GPATCH8  | <input type="checkbox"/> | 0 (0) | 0 (0) | 0 (0) | 1 (2) | 0 (0) | 4 (2) | 5 (4) | 9 (6)  | 10 (7) | 0 (0) |
| MAP1B_HUMAN | MAP1B_HUMAN | Microtubule-associated protein 1B                           | MAP1B    | <input type="checkbox"/> | 0 (0) | 0 (0) | 0 (0) | 4 (2) | 4 (1) | 2 (1) | 3 (1) | 5 (2)  | 11 (5) | 2 (1) |
| TIPRL_HUMAN | TIPRL_HUMAN | TIP41-like protein                                          | TIPRL    | <input type="checkbox"/> | 0 (0) | 0 (0) | 0 (0) | 1 (2) | 1 (1) | 1 (1) | 2 (2) | 10 (5) | 13 (4) | 0 (0) |
| MYO9B_HUMAN | MYO9B_HUMAN | Myosin-Ixb                                                  | MYO9B    | <input type="checkbox"/> | 0 (0) | 0 (0) | 0 (0) | 0 (0) | 7 (2) | 7 (2) | 6 (2) | 4 (1)  | 1 (1)  | 4 (1) |
| K0528_HUMAN | K0528_HUMAN | Uncharacterized protein KIAA0528                            | KIAA0528 | <input type="checkbox"/> | 0 (0) | 1 (1) | 0 (0) | 1 (1) | 5 (1) | 6 (1) | 6 (1) | 4 (1)  | 5 (1)  | 3 (1) |
| TDIF1_HUMAN | TDIF1_HUMAN | Deoxynucleotidyltransferase terminal-interacting protein 1  | DNTTIP1  | <input type="checkbox"/> | 0 (0) | 3 (3) | 2 (2) | 2 (2) | 3 (2) | 6 (3) | 3 (1) | 6 (3)  | 2 (1)  | 4 (4) |
| NFIA_HUMAN  | NFIA_HUMAN  | Nuclear factor 1 A-type                                     | NFIA     | <input type="checkbox"/> | 0 (0) | 0 (0) | 0 (0) | 0 (0) | 5 (4) | 6 (4) | 5 (4) | 6 (5)  | 4 (3)  | 3 (2) |
| MAST2_HUMAN | MAST2_HUMAN | Microtubule-associated serine/threonine-protein kinase 2    | MAST2    | <input type="checkbox"/> | 2 (1) | 2 (2) | 2 (1) | 3 (3) | 4 (3) | 5 (3) | 2 (1) | 4 (3)  | 3 (2)  | 4 (2) |
| CNNM3_HUMAN | CNNM3_HUMAN | Metal transporter CNNM3                                     | CNNM3    | <input type="checkbox"/> | 2 (1) | 2 (2) | 3 (2) | 1 (1) | 4 (4) | 4 (3) | 3 (2) | 4 (3)  | 4 (3)  | 3 (2) |
| ANS1A_HUMAN | ANS1A_HUMAN | Ankyrin repeat and SAM domain-containing protein 1A         | ANKS1A   | <input type="checkbox"/> | 0 (0) | 0 (0) | 0 (0) | 1 (1) | 6 (2) | 9 (4) | 5 (3) | 4 (2)  | 1 (2)  | 3 (2) |
| NIPBL_HUMAN | NIPBL_HUMAN | Nipped-B-like protein                                       | NIPBL    | <input type="checkbox"/> | 0 (0) | 0 (0) | 1 (1) | 5 (4) | 0 (0) | 3 (2) | 4 (2) | 7 (3)  | 10 (4) | 0 (0) |
| RAI3_HUMAN  | RAI3_HUMAN  | Retinoic acid-induced protein 3                             | GPRC5A   | <input type="checkbox"/> | 0 (0) | 0 (0) | 0 (0) | 0 (0) | 5 (2) | 6 (3) | 6 (2) | 6 (3)  | 2 (1)  | 5 (2) |
| MYPT1_HUMAN | MYPT1_HUMAN | Protein phosphatase 1 regulatory subunit 12A                | PPP1R12A | <input type="checkbox"/> | 4 (1) | 3 (1) | 4 (1) | 5 (2) | 2 (2) | 0 (0) | 2 (1) | 1 (1)  | 6 (5)  | 2 (2) |
| E41L2_HUMAN | E41L2_HUMAN | Band 4.1-like protein 2                                     | EPB41L2  | <input type="checkbox"/> | 0 (0) | 0 (0) | 0 (0) | 1 (1) | 4 (2) | 3 (2) | 2 (1) | 5 (4)  | 12 (6) | 2 (1) |
| FUBP3_HUMAN | FUBP3_HUMAN | Far upstream element-binding protein 3                      | FUBP3    | <input type="checkbox"/> | 0 (0) | 0 (0) | 1 (1) | 2 (1) | 4 (1) | 4 (1) | 4 (1) | 4 (1)  | 6 (2)  | 4 (1) |
| MACF1_HUMAN | MACF1_HUMAN | Microtubule-actin cross-linking factor 1, isoforms 1/2/3/5  | MACF1    | <input type="checkbox"/> | 0 (0) | 0 (0) | 2 (1) | 4 (1) | 4 (2) | 4 (3) | 3 (2) | 4 (2)  | 6 (4)  | 2 (1) |
| PHF6_HUMAN  | PHF6_HUMAN  | PHD finger protein 6                                        | PHF6     | <input type="checkbox"/> | 0 (0) | 0 (0) | 0 (0) | 1 (2) | 4 (1) | 4 (1) | 4 (1) | 6 (2)  | 7 (3)  | 1 (1) |
| BIG1_HUMAN  | BIG1_HUMAN  | Brefeldin A-inhibited guanine nucleotide-exchange protein 1 | ARFGEF1  | <input type="checkbox"/> | 0 (0) | 1 (1) | 4 (2) | 2 (1) | 3 (2) | 6 (4) | 4 (2) | 4 (2)  | 3 (2)  | 2 (2) |
| UT14A_HUMAN | UT14A_HUMAN | U3 small nucleolar RNA-associated protein 14                | UTP14A   | <input type="checkbox"/> | 0 (0) | 0 (0) | 0 (0) | 4 (1) | 1 (1) | 1 (1) | 4 (3) | 7 (3)  | 12 (6) | 0 (0) |

|               |               | homolog A                                                                         |          |   |       |       |       |        |       |       |       |       |        |       |
|---------------|---------------|-----------------------------------------------------------------------------------|----------|---|-------|-------|-------|--------|-------|-------|-------|-------|--------|-------|
| PDXD1_HUMAN   | PDXD1_HUMAN   | Pyridoxal-dependent decarboxylase domain-containing protein 1                     | PDXDC1   | ☐ | 2 (1) | 2 (1) | 3 (1) | 3 (1)  | 2 (1) | 2 (1) | 3 (2) | 3 (2) | 6 (3)  | 3 (2) |
| ATRX_HUMAN    | ATRX_HUMAN    | Transcriptional regulator ATRX                                                    | ATRX     | ☐ | 0 (0) | 0 (0) | 0 (0) | 0 (0)  | 4 (4) | 3 (3) | 6 (5) | 6 (6) | 8 (4)  | 1 (1) |
| LC7L3_HUMAN   | LC7L3_HUMAN   | Luc7-like protein 3                                                               | LUC7L3   | ☐ | 0 (0) | 0 (0) | 0 (0) | 1 (1)  | 0 (0) | 2 (2) | 6 (4) | 6 (3) | 11 (5) | 0 (0) |
| TACC1_HUMAN   | TACC1_HUMAN   | Transforming acidic coiled-coil-containing protein 1                              | TACC1    | ☐ | 2 (2) | 2 (1) | 2 (1) | 2 (1)  | 4 (2) | 4 (1) | 4 (1) | 3 (2) | 2 (1)  | 3 (1) |
| NBEL1_HUMAN   | NBEL1_HUMAN   | Neurobeachin-like protein 1                                                       | NBEAL1   | ☐ | 1 (1) | 0 (0) | 0 (0) | 1 (1)  | 4 (1) | 3 (1) | 4 (1) | 6 (2) | 5 (2)  | 4 (1) |
| SRGP1_HUMAN   | SRGP1_HUMAN   | SLIT-ROBO Rho GTPase-activating protein 1                                         | SRGAP1   | ☐ | 0 (0) | 0 (0) | 0 (0) | 0 (0)  | 3 (1) | 7 (4) | 6 (3) | 5 (2) | 3 (1)  | 4 (3) |
| ARHGQ_HUMAN   | ARHGQ_HUMAN   | Rho guanine nucleotide exchange factor 26                                         | ARHGEF26 | ☐ | 4 (2) | 2 (1) | 2 (1) | 2 (1)  | 2 (1) | 3 (2) | 3 (2) | 5 (2) | 2 (1)  | 2 (2) |
| PHLB1_HUMAN   | PHLB1_HUMAN   | Pleckstrin homology-like domain family B member 1                                 | PHLDB1   | ☐ | 0 (0) | 0 (0) | 0 (0) | 0 (0)  | 6 (3) | 4 (2) | 4 (3) | 4 (3) | 3 (3)  | 6 (4) |
| HMGN4_HUMAN   | HMGN4_HUMAN   | High mobility group nucleosome-binding domain-containing protein 4                | HMGN4    | ☐ | 0 (0) | 0 (0) | 0 (0) | 4 (2)  | 0 (0) | 4 (1) | 4 (2) | 7 (3) | 6 (4)  | 0 (0) |
| HTSF1_HUMAN   | HTSF1_HUMAN   | HIV Tat-specific factor 1                                                         | HTATSF1  | ☐ | 0 (0) | 0 (0) | 0 (0) | 0 (0)  | 3 (2) | 5 (3) | 6 (4) | 4 (3) | 6 (3)  | 3 (2) |
| TPR_HUMAN     | TPR_HUMAN     | Nucleoprotein TPR                                                                 | TPR      | ☐ | 0 (0) | 0 (0) | 0 (0) | 3 (2)  | 0 (0) | 3 (2) | 3 (2) | 6 (3) | 12 (5) | 0 (0) |
| SL9A1_HUMAN   | SL9A1_HUMAN   | Sodium/hydrogen exchanger 1                                                       | SLC9A1   | ☐ | 0 (0) | 0 (0) | 3 (1) | 2 (2)  | 2 (2) | 5 (4) | 5 (3) | 5 (4) | 3 (2)  | 2 (2) |
| B4DSP3_HUMAN  | B4DSP3_HUMAN  | cDNA FLJ57034, highly similar to Serine-protein kinase ATM (EC 2.7.11.1)          | NULL     | ☐ | 3 (2) | 4 (1) | 4 (1) | 3 (1)  | 2 (1) | 2 (1) | 2 (1) | 2 (1) | 2 (1)  | 2 (1) |
| 2A5E_HUMAN    | 2A5E_HUMAN    | Serine/threonine-protein phosphatase 2A 56 kDa regulatory subunit epsilon isoform | PPP2R5E  | ☐ | 3 (1) | 6 (2) | 4 (1) | 4 (1)  | 2 (1) | 2 (1) | 1 (1) | 1 (1) | 0 (0)  | 1 (1) |
| CENPQ_HUMAN   | CENPQ_HUMAN   | Centromere protein Q                                                              | CENPQ    | ☐ | 2 (2) | 1 (1) | 2 (2) | 1 (1)  | 4 (2) | 3 (2) | 3 (2) | 3 (2) | 2 (1)  | 4 (3) |
| US6NL_HUMAN   | US6NL_HUMAN   | USP6 N-terminal-like protein                                                      | USP6NL   | ☐ | 2 (1) | 4 (3) | 2 (1) | 0 (0)  | 3 (3) | 3 (2) | 3 (2) | 3 (2) | 2 (1)  | 4 (3) |
| SUGP2_HUMAN   | SUGP2_HUMAN   | --                                                                                | --       | ☐ | 0 (0) | 0 (0) | 1 (1) | 1 (1)  | 4 (2) | 4 (1) | 4 (2) | 4 (1) | 4 (1)  | 4 (1) |
| SEPT6_HUMAN   | SEPT6_HUMAN   | Septin-6                                                                          | SEPT6    | ☐ | 0 (0) | 1 (1) | 2 (2) | 0 (0)  | 4 (2) | 5 (5) | 4 (3) | 5 (3) | 1 (1)  | 4 (2) |
| CSDE1_HUMAN   | CSDE1_HUMAN   | Cold shock domain-containing protein E1                                           | CSDE1    | ☐ | 0 (0) | 2 (1) | 0 (0) | 1 (1)  | 3 (1) | 4 (1) | 4 (1) | 4 (1) | 4 (1)  | 4 (1) |
| STIM1_HUMAN   | STIM1_HUMAN   | Stromal interaction molecule 1                                                    | STIM1    | ☐ | 0 (0) | 2 (1) | 3 (1) | 3 (1)  | 2 (1) | 4 (1) | 4 (1) | 4 (1) | 2 (1)  | 2 (1) |
| TE2IP_HUMAN   | TE2IP_HUMAN   | Telomeric repeat-binding protein 2-interacting protein 1                          | TERF2IP  | ☐ | 0 (0) | 0 (0) | 3 (3) | 4 (2)  | 2 (1) | 4 (2) | 3 (2) | 4 (2) | 4 (2)  | 1 (1) |
| TF3C1_HUMAN   | TF3C1_HUMAN   | General transcription factor 3C polypeptide 1                                     | GTF3C1   | ☐ | 1 (1) | 0 (0) | 0 (0) | 0 (0)  | 4 (2) | 4 (3) | 4 (2) | 3 (2) | 4 (3)  | 6 (5) |
| NFIP2_HUMAN   | NFIP2_HUMAN   | NEED4 family-interacting protein 2                                                | NDFIP2   | ☐ | 0 (0) | 0 (0) | 3 (1) | 3 (1)  | 0 (0) | 4 (2) | 7 (3) | 3 (1) | 4 (2)  | 2 (1) |
| INCE_HUMAN    | INCE_HUMAN    | Inner centromere protein                                                          | INCENP   | ☐ | 0 (0) | 0 (0) | 0 (0) | 0 (0)  | 6 (4) | 3 (2) | 3 (2) | 4 (3) | 5 (4)  | 5 (4) |
| COG1_HUMAN    | COG1_HUMAN    | Conserved oligomeric Golgi complex subunit 1                                      | COG1     | ☐ | 4 (1) | 2 (1) | 2 (1) | 2 (1)  | 2 (1) | 3 (1) | 3 (1) | 2 (1) | 3 (1)  | 2 (1) |
| ARFG2_HUMAN   | ARFG2_HUMAN   | ADP-ribosylation factor GTPase-activating protein 2                               | ARFGAP2  | ☐ | 2 (1) | 0 (0) | 1 (1) | 2 (1)  | 3 (1) | 4 (2) | 3 (1) | 4 (1) | 3 (1)  | 3 (1) |
| RAC1_HUMAN    | RAC1_HUMAN    | Ras-related C3 botulinum toxin substrate 1                                        | RAC1     | ☐ | 2 (1) | 2 (1) | 2 (1) | 2 (1)  | 2 (1) | 4 (2) | 4 (2) | 3 (2) | 2 (1)  | 2 (1) |
| MYO1E_HUMAN   | MYO1E_HUMAN   | Myosin-1e                                                                         | MYO1E    | ☐ | 1 (1) | 2 (1) | 2 (1) | 2 (1)  | 2 (1) | 4 (1) | 4 (1) | 4 (1) | 3 (1)  | 1 (1) |
| UBR1_HUMAN    | UBR1_HUMAN    | E3 ubiquitin-protein ligase UBR1                                                  | UBR1     | ☐ | 0 (0) | 0 (0) | 1 (1) | 2 (1)  | 2 (1) | 2 (1) | 4 (2) | 6 (2) | 6 (2)  | 2 (1) |
| PPM1G_HUMAN   | PPM1G_HUMAN   | Protein phosphatase 1G                                                            | PPM1G    | ☐ | 0 (0) | 1 (1) | 0 (0) | 4 (1)  | 2 (1) | 4 (1) | 2 (1) | 6 (2) | 6 (2)  | 0 (0) |
| HP1B3_HUMAN   | HP1B3_HUMAN   | Heterochromatin protein 1-binding protein 3                                       | HP1BP3   | ☐ | 3 (2) | 5 (2) | 3 (2) | 11 (2) | 0 (0) | 0 (0) | 0 (0) | 1 (1) | 2 (1)  | 0 (0) |
| KC1E_HUMAN    | KC1E_HUMAN    | Casein kinase I isoform epsilon                                                   | CSNK1E   | ☐ | 1 (1) | 1 (1) | 2 (1) | 2 (1)  | 4 (1) | 4 (1) | 4 (1) | 3 (1) | 2 (1)  | 2 (1) |
| MBD1_HUMAN    | MBD1_HUMAN    | Methyl-CpG-binding domain protein 1                                               | MBD1     | ☐ | 0 (0) | 0 (0) | 1 (1) | 2 (1)  | 4 (4) | 4 (2) | 4 (2) | 4 (2) | 4 (2)  | 2 (2) |
| CHD4_HUMAN    | CHD4_HUMAN    | Chromodomain-helicase-DNA-binding protein 4                                       | CHD4     | ☐ | 0 (0) | 0 (0) | 0 (0) | 0 (0)  | 1 (1) | 6 (4) | 6 (4) | 6 (3) | 6 (4)  | 0 (0) |
| IMMT_HUMAN    | IMMT_HUMAN    | Mitochondrial inner membrane protein                                              | IMMT     | ☐ | 0 (0) | 2 (1) | 0 (0) | 1 (1)  | 5 (2) | 4 (1) | 4 (1) | 2 (1) | 4 (1)  | 3 (1) |
| CARF_HUMAN    | CARF_HUMAN    | CDKN2A-interacting protein                                                        | CDKN2AIP | ☐ | 0 (0) | 0 (0) | 0 (0) | 0 (0)  | 2 (1) | 2 (1) | 2 (1) | 6 (5) | 13 (9) | 0 (0) |
| ANKRD12_HUMAN | ANKRD12_HUMAN | Ankyrin repeat domain-containing protein 12                                       | ANKRD12  | ☐ | 0 (0) | 0 (0) | 2 (1) | 0 (0)  | 4 (2) | 4 (2) | 4 (3) | 4 (2) | 3 (1)  | 3 (1) |
| DDX18_HUMAN   | DDX18_HUMAN   | ATP-dependent RNA helicase DDX18                                                  | DDX18    | ☐ | 0 (0) | 0 (0) | 0 (0) | 1 (2)  | 1 (1) | 1 (1) | 3 (2) | 6 (5) | 6 (4)  | 4 (3) |
| TPD52_HUMAN   | TPD52_HUMAN   | Tumor protein D52                                                                 | TPD52    | ☐ | 0 (0) | 0 (0) | 0 (0) | 1 (1)  | 0 (0) | 0 (0) | 5 (2) | 5 (2) | 6 (4)  | 2 (2) |
| ARI2_HUMAN    | ARI2_HUMAN    | E3 ubiquitin-protein ligase ARIH2                                                 | ARIH2    | ☐ | 2 (1) | 2 (1) | 2 (1) | 2 (1)  | 2 (1) | 3 (1) | 2 (1) | 3 (1) | 4 (2)  | 2 (1) |
| XRCC5_HUMAN   | XRCC5_HUMAN   | X-ray repair cross-complementing protein 5                                        | XRCC5    | ☐ | 0 (0) | 2 (2) | 4 (2) | 3 (3)  | 4 (3) | 4 (3) | 1 (1) | 3 (3) | 4 (2)  | 1 (1) |
| ERCC6L_HUMAN  | ERCC6L_HUMAN  | DNA excision repair protein ERCC-6-like                                           | ERCC6L   | ☐ | 0 (0) | 0 (0) | 0 (0) | 0 (0)  | 5 (3) | 2 (1) | 4 (2) | 4 (2) | 5 (3)  | 4 (3) |

|              |              |                                                                     |          |                          |       |       |       |       |       |       |       |       |       |       |
|--------------|--------------|---------------------------------------------------------------------|----------|--------------------------|-------|-------|-------|-------|-------|-------|-------|-------|-------|-------|
| BMP2K_HUMAN  | BMP2K_HUMAN  | BMP-2-inducible protein kinase                                      | BMP2K    | <input type="checkbox"/> | 0 (0) | 0 (0) | 0 (0) | 0 (0) | 4 (2) | 4 (1) | 4 (2) | 3 (1) | 4 (2) | 4 (1) |
| RL21_HUMAN   | RL21_HUMAN   | 60S ribosomal protein L21                                           | RPL21    | <input type="checkbox"/> | 0 (0) | 0 (0) | 0 (0) | 0 (0) | 4 (1) | 4 (1) | 4 (1) | 4 (1) | 3 (1) | 4 (1) |
| RBM14_HUMAN  | RBM14_HUMAN  | RNA-binding protein 14                                              | RBM14    | <input type="checkbox"/> | 3 (2) | 2 (1) | 2 (1) | 4 (2) | 2 (1) | 2 (1) | 2 (1) | 2 (1) | 2 (1) | 2 (1) |
| SYNC_HUMAN   | SYNC_HUMAN   | Asparaginyl-tRNA synthetase, cytoplasmic                            | NARS     | <input type="checkbox"/> | 2 (1) | 3 (1) | 2 (1) | 1 (1) | 4 (2) | 3 (2) | 1 (1) | 3 (2) | 2 (2) | 2 (2) |
| RAI1_HUMAN   | RAI1_HUMAN   | Retinoic acid-induced protein 1                                     | RAI1     | <input type="checkbox"/> | 0 (0) | 0 (0) | 0 (0) | 0 (0) | 5 (2) | 5 (3) | 4 (2) | 3 (2) | 2 (1) | 4 (2) |
| MPDZ_HUMAN   | MPDZ_HUMAN   | Multiple PDZ domain protein                                         | MPDZ     | <input type="checkbox"/> | 0 (0) | 0 (0) | 0 (0) | 1 (1) | 5 (5) | 3 (3) | 2 (2) | 1 (1) | 3 (3) | 8 (5) |
| TB182_HUMAN  | TB182_HUMAN  | 182 kDa tankyrase-1-binding protein                                 | TNKS1BP1 | <input type="checkbox"/> | 0 (0) | 0 (0) | 0 (0) | 1 (0) | 2 (1) | 0 (0) | 2 (1) | 4 (2) | 5 (5) | 2 (1) |
| AT11C_HUMAN  | AT11C_HUMAN  | Probable phospholipid-transporting ATPase IG                        | ATP11C   | <input type="checkbox"/> | 0 (0) | 0 (0) | 0 (0) | 0 (0) | 5 (3) | 5 (2) | 5 (2) | 3 (1) | 2 (1) | 3 (3) |
| KIF23_HUMAN  | KIF23_HUMAN  | Kinesin-like protein KIF23                                          | KIF23    | <input type="checkbox"/> | 0 (0) | 1 (1) | 0 (0) | 1 (1) | 3 (2) | 5 (3) | 4 (2) | 3 (2) | 3 (2) | 3 (2) |
| SLK_HUMAN    | SLK_HUMAN    | STE20-like serine/threonine-protein kinase                          | SLK      | <input type="checkbox"/> | 0 (0) | 0 (0) | 0 (0) | 0 (0) | 4 (3) | 4 (2) | 6 (3) | 2 (1) | 3 (2) | 2 (1) |
| F1712_HUMAN  | F1712_HUMAN  | Protein FAM171A2                                                    | FAM171A2 | <input type="checkbox"/> | 0 (0) | 0 (0) | 0 (0) | 0 (0) | 3 (1) | 5 (2) | 3 (1) | 6 (2) | 4 (2) | 2 (1) |
| RGPA1_HUMAN  | RGPA1_HUMAN  | Ral GTPase-activating protein subunit alpha-1                       | RALGAPA1 | <input type="checkbox"/> | 0 (0) | 1 (1) | 2 (2) | 0 (0) | 4 (2) | 3 (2) | 3 (3) | 3 (3) | 2 (1) | 4 (2) |
| KIF2C_HUMAN  | KIF2C_HUMAN  | Kinesin-like protein KIF2C                                          | KIF2C    | <input type="checkbox"/> | 0 (0) | 0 (0) | 0 (0) | 1 (1) | 3 (2) | 4 (2) | 4 (2) | 4 (2) | 4 (2) | 2 (2) |
| HNRPU_HUMAN  | HNRPU_HUMAN  | Heterogeneous nuclear ribonucleoprotein U                           | HNRNPU   | <input type="checkbox"/> | 0 (0) | 0 (0) | 2 (1) | 2 (1) | 0 (0) | 2 (2) | 2 (1) | 6 (3) | 8 (3) | 0 (0) |
| BIG2_HUMAN   | BIG2_HUMAN   | Brefeldin A-inhibited guanine nucleotide-exchange protein 2         | ARFGEF2  | <input type="checkbox"/> | 0 (0) | 0 (0) | 0 (0) | 0 (0) | 4 (2) | 4 (2) | 4 (2) | 4 (2) | 2 (1) | 4 (2) |
| PDS5B_HUMAN  | PDS5B_HUMAN  | Sister chromatid cohesion protein PDS5 homolog B                    | PDS5B    | <input type="checkbox"/> | 0 (0) | 0 (0) | 0 (0) | 1 (1) | 4 (3) | 4 (3) | 4 (4) | 4 (3) | 2 (1) | 3 (2) |
| AT5F1_HUMAN  | AT5F1_HUMAN  | ATP synthase subunit b, mitochondrial                               | ATP5F1   | <input type="checkbox"/> | 0 (0) | 0 (0) | 0 (0) | 0 (0) | 4 (2) | 4 (4) | 4 (3) | 4 (3) | 2 (1) | 4 (3) |
| PKHH1_HUMAN  | PKHH1_HUMAN  | Pleckstrin homology domain-containing family H member 1             | PLEKHH1  | <input type="checkbox"/> | 0 (0) | 0 (0) | 0 (0) | 0 (0) | 5 (2) | 5 (2) | 3 (2) | 2 (1) | 2 (1) | 5 (2) |
| TFDP1_HUMAN  | TFDP1_HUMAN  | Transcription factor Dp-1                                           | TFDP1    | <input type="checkbox"/> | 0 (0) | 0 (0) | 0 (0) | 1 (1) | 3 (1) | 5 (2) | 3 (2) | 4 (1) | 4 (1) | 2 (2) |
| DLG1_HUMAN   | DLG1_HUMAN   | Disks large homolog 1                                               | DLG1     | <input type="checkbox"/> | 0 (0) | 0 (0) | 2 (2) | 2 (2) | 0 (0) | 6 (4) | 4 (3) | 4 (3) | 4 (3) | 0 (0) |
| EP15R_HUMAN  | EP15R_HUMAN  | Epidermal growth factor receptor substrate 15-like 1                | EPS15L1  | <input type="checkbox"/> | 0 (0) | 0 (0) | 0 (0) | 0 (0) | 2 (2) | 3 (3) | 5 (3) | 6 (4) | 6 (3) | 0 (0) |
| UCKL1_HUMAN  | UCKL1_HUMAN  | Uridine-cytidine kinase-like 1                                      | UCKL1    | <input type="checkbox"/> | 8 (1) | 8 (2) | 0 (0) | 0 (0) | 2 (2) | 0 (0) | 0 (0) | 0 (0) | 0 (0) | 4 (2) |
| UBXN4_HUMAN  | UBXN4_HUMAN  | UBX domain-containing protein 4                                     | UBXN4    | <input type="checkbox"/> | 0 (0) | 0 (0) | 0 (0) | 0 (0) | 3 (1) | 4 (1) | 5 (2) | 4 (1) | 3 (1) | 3 (1) |
| NACA_HUMAN   | NACA_HUMAN   | Nascent polypeptide-associated complex subunit alpha                | NACA     | <input type="checkbox"/> | 0 (0) | 1 (1) | 1 (1) | 6 (2) | 2 (1) | 2 (1) | 2 (1) | 2 (1) | 4 (1) | 2 (1) |
| TCPB_HUMAN   | TCPB_HUMAN   | T-complex protein 1 subunit beta                                    | CCT2     | <input type="checkbox"/> | 0 (0) | 0 (0) | 0 (0) | 0 (0) | 3 (2) | 3 (2) | 4 (2) | 4 (2) | 4 (2) | 4 (2) |
| KIF4A_HUMAN  | KIF4A_HUMAN  | Chromosome-associated kinesin KIF4A                                 | KIF4A    | <input type="checkbox"/> | 0 (0) | 1 (1) | 0 (0) | 0 (0) | 5 (1) | 4 (1) | 3 (1) | 2 (1) | 4 (1) | 3 (1) |
| CP110_HUMAN  | CP110_HUMAN  | Centriolin                                                          | CEP110   | <input type="checkbox"/> | 0 (0) | 0 (0) | 0 (0) | 0 (0) | 3 (1) | 4 (2) | 3 (1) | 5 (1) | 4 (1) | 2 (1) |
| RBM4_HUMAN   | RBM4_HUMAN   | RNA-binding protein 4                                               | RBM4     | <input type="checkbox"/> | 2 (1) | 2 (1) | 2 (1) | 3 (1) | 3 (1) | 2 (2) | 3 (2) | 2 (1) | 2 (1) | 2 (1) |
| TXLNA_HUMAN  | TXLNA_HUMAN  | Alpha-taxilin                                                       | TXLNA    | <input type="checkbox"/> | 0 (0) | 0 (0) | 0 (0) | 0 (0) | 4 (2) | 4 (2) | 3 (2) | 3 (2) | 3 (2) | 4 (2) |
| SUN2_HUMAN   | SUN2_HUMAN   | SUN domain-containing protein 2                                     | SUN2     | <input type="checkbox"/> | 0 (0) | 0 (0) | 0 (0) | 0 (0) | 3 (3) | 3 (2) | 2 (2) | 3 (3) | 7 (5) | 3 (3) |
| G6PI_HUMAN   | G6PI_HUMAN   | Glucose-6-phosphate isomerase                                       | GPI      | <input type="checkbox"/> | 0 (0) | 0 (0) | 0 (0) | 0 (0) | 5 (3) | 4 (2) | 3 (2) | 3 (2) | 3 (2) | 3 (2) |
| RLGPB_HUMAN  | RLGPB_HUMAN  | Ral GTPase-activating protein subunit beta                          | RALGAPB  | <input type="checkbox"/> | 0 (0) | 0 (0) | 0 (0) | 0 (0) | 3 (2) | 3 (3) | 4 (3) | 4 (2) | 4 (3) | 3 (3) |
| BRD8_HUMAN   | BRD8_HUMAN   | Bromodomain-containing protein 8                                    | BRD8     | <input type="checkbox"/> | 0 (0) | 0 (0) | 0 (0) | 0 (0) | 3 (3) | 3 (3) | 4 (2) | 4 (3) | 5 (3) | 2 (1) |
| OGFR_HUMAN   | OGFR_HUMAN   | Opioid growth factor receptor                                       | OGFR     | <input type="checkbox"/> | 0 (0) | 1 (1) | 2 (1) | 4 (1) | 0 (0) | 2 (1) | 2 (1) | 6 (3) | 4 (3) | 0 (0) |
| LIN9_HUMAN   | LIN9_HUMAN   | Protein lin-9 homolog                                               | LIN9     | <input type="checkbox"/> | 2 (1) | 4 (2) | 4 (2) | 2 (2) | 2 (1) | 2 (1) | 2 (1) | 2 (1) | 0 (0) | 2 (1) |
| PHB2_HUMAN   | PHB2_HUMAN   | Prohibitin-2                                                        | PHB2     | <input type="checkbox"/> | 0 (0) | 0 (0) | 0 (0) | 0 (0) | 4 (2) | 3 (2) | 4 (3) | 4 (2) | 4 (2) | 2 (1) |
| CADH2_HUMAN  | CADH2_HUMAN  | Cadherin-2                                                          | CDH2     | <input type="checkbox"/> | 0 (0) | 2 (1) | 0 (0) | 1 (1) | 3 (1) | 4 (1) | 4 (1) | 2 (1) | 2 (1) | 3 (2) |
| WBP2_HUMAN   | WBP2_HUMAN   | WW domain-binding protein 2                                         | WBP2     | <input type="checkbox"/> | 0 (0) | 0 (0) | 0 (0) | 0 (0) | 3 (1) | 4 (1) | 3 (2) | 3 (1) | 5 (1) | 3 (1) |
| ATM_HUMAN    | ATM_HUMAN    | Serine-protein kinase ATM                                           | ATM      | <input type="checkbox"/> | 0 (0) | 0 (0) | 0 (0) | 2 (1) | 1 (1) | 2 (1) | 3 (2) | 6 (3) | 6 (3) | 0 (0) |
| ELF1_HUMAN   | ELF1_HUMAN   | ETS-related transcription factor Elf-1                              | ELF1     | <input type="checkbox"/> | 0 (0) | 0 (0) | 0 (0) | 2 (2) | 0 (0) | 2 (1) | 4 (2) | 5 (3) | 7 (3) | 0 (0) |
| TDRD3_HUMAN  | TDRD3_HUMAN  | Tudor domain-containing protein 3                                   | TDRD3    | <input type="checkbox"/> | 0 (0) | 0 (0) | 1 (1) | 2 (1) | 3 (2) | 2 (1) | 3 (2) | 3 (3) | 4 (2) | 2 (1) |
| TCOF_HUMAN   | TCOF_HUMAN   | Treacle protein                                                     | TCOF1    | <input type="checkbox"/> | 0 (0) | 0 (0) | 0 (0) | 0 (0) | 3 (3) | 4 (2) | 3 (3) | 5 (3) | 3 (2) | 2 (2) |
| PKN3_HUMAN   | PKN3_HUMAN   | Serine/threonine-protein kinase N3                                  | PKN3     | <input type="checkbox"/> | 0 (0) | 0 (0) | 1 (1) | 0 (0) | 4 (2) | 3 (2) | 3 (2) | 3 (2) | 4 (2) | 2 (1) |
| B4DJT8_HUMAN | B4DJT8_HUMAN | cDNA FLJ61295, highly similar to Gamma-interferon-inducible protein | NULL     | <input type="checkbox"/> | 0 (0) | 0 (0) | 0 (0) | 1 (1) | 3 (2) | 2 (1) | 3 (1) | 4 (2) | 6 (2) | 2 (1) |

|              |              | lfi-16                                                                                           |          |   |       |       |       |       |       |       |       |       |       |       |
|--------------|--------------|--------------------------------------------------------------------------------------------------|----------|---|-------|-------|-------|-------|-------|-------|-------|-------|-------|-------|
| PML_HUMAN    | PML_HUMAN    | Probable transcription factor PML                                                                | PML      | ☐ | 0 (0) | 0 (0) | 0 (0) | 0 (0) | 4 (2) | 4 (2) | 2 (1) | 4 (2) | 2 (1) | 4 (2) |
| SNIP1_HUMAN  | SNIP1_HUMAN  | Smad nuclear-interacting protein 1                                                               | SNIP1    | ☐ | 0 (0) | 0 (0) | 0 (0) | 0 (0) | 0 (0) | 0 (0) | 3 (2) | 8 (3) | 8 (3) | 1 (1) |
| ROCK2_HUMAN  | ROCK2_HUMAN  | Rho-associated protein kinase 2                                                                  | ROCK2    | ☐ | 0 (0) | 0 (0) | 0 (0) | 0 (0) | 3 (2) | 4 (2) | 3 (2) | 4 (2) | 4 (3) | 2 (1) |
| CRCM_HUMAN   | CRCM_HUMAN   | Colorectal mutant cancer protein                                                                 | MCC      | ☐ | 0 (0) | 0 (0) | 0 (0) | 0 (0) | 3 (3) | 5 (2) | 4 (2) | 2 (1) | 4 (2) | 2 (1) |
| CND1_HUMAN   | CND1_HUMAN   | Condensin complex subunit 1                                                                      | NCAPD2   | ☐ | 0 (0) | 1 (1) | 2 (2) | 6 (3) | 1 (1) | 1 (1) | 1 (1) | 3 (3) | 4 (2) | 1 (1) |
| ABCF1_HUMAN  | ABCF1_HUMAN  | ATP-binding cassette sub-family F member 1                                                       | ABCF1    | ☐ | 0 (0) | 1 (1) | 0 (0) | 1 (1) | 4 (1) | 1 (1) | 0 (0) | 3 (1) | 6 (2) | 4 (1) |
| TBB5_HUMAN   | TBB5_HUMAN   | Tubulin beta chain                                                                               | TUBB     | ☐ | 2 (1) | 3 (1) | 0 (0) | 2 (1) | 1 (1) | 3 (1) | 3 (1) | 1 (1) | 1 (1) | 2 (1) |
| CL043_HUMAN  | CL043_HUMAN  | Uncharacterized protein C12orf43                                                                 | C12orf43 | ☐ | 0 (0) | 1 (1) | 0 (0) | 2 (1) | 2 (1) | 2 (1) | 2 (1) | 4 (2) | 5 (3) | 2 (1) |
| CA198_HUMAN  | CA198_HUMAN  | Uncharacterized protein C1orf198                                                                 | C1orf198 | ☐ | 0 (0) | 1 (1) | 2 (1) | 2 (1) | 2 (1) | 3 (1) | 2 (1) | 3 (2) | 2 (1) | 2 (1) |
| LRCH3_HUMAN  | LRCH3_HUMAN  | Leucine-rich repeat and calponin homology domain-containing protein 3                            | LRCH3    | ☐ | 0 (0) | 0 (0) | 0 (0) | 0 (0) | 4 (3) | 5 (2) | 3 (2) | 3 (2) | 1 (1) | 3 (2) |
| CEP55_HUMAN  | CEP55_HUMAN  | Centrosomal protein of 55 kDa                                                                    | CEP55    | ☐ | 0 (0) | 0 (0) | 0 (0) | 0 (0) | 4 (3) | 5 (2) | 3 (2) | 2 (1) | 2 (1) | 3 (2) |
| BUB1_HUMAN   | BUB1_HUMAN   | Mitotic checkpoint serine/threonine-protein kinase BUB1                                          | BUB1     | ☐ | 0 (0) | 0 (0) | 0 (0) | 0 (0) | 4 (2) | 4 (2) | 2 (1) | 4 (2) | 1 (1) | 4 (2) |
| NUP98_HUMAN  | NUP98_HUMAN  | Nuclear pore complex protein Nup98-Nup96                                                         | NUP98    | ☐ | 0 (0) | 0 (0) | 0 (0) | 0 (0) | 4 (2) | 4 (2) | 3 (2) | 4 (2) | 2 (1) | 2 (1) |
| RHG05_HUMAN  | RHG05_HUMAN  | Rho GTPase-activating protein 5                                                                  | ARHGAP5  | ☐ | 0 (0) | 0 (0) | 0 (0) | 0 (0) | 3 (2) | 2 (1) | 4 (2) | 4 (3) | 2 (1) | 4 (2) |
| TRM6_HUMAN   | TRM6_HUMAN   | tRNA (adenine-N(1)-methyltransferase non-catalytic subunit TRM6                                  | TRMT6    | ☐ | 0 (0) | 0 (0) | 0 (0) | 1 (1) | 2 (1) | 1 (1) | 2 (1) | 4 (2) | 5 (2) | 2 (1) |
| TLN1_HUMAN   | TLN1_HUMAN   | Talin-1                                                                                          | TLN1     | ☐ | 0 (0) | 0 (0) | 0 (0) | 0 (0) | 4 (2) | 4 (3) | 4 (3) | 3 (2) | 3 (2) | 1 (1) |
| RS2_HUMAN    | RS2_HUMAN    | 40S ribosomal protein S2                                                                         | RPS2     | ☐ | 0 (0) | 1 (1) | 2 (1) | 3 (1) | 2 (1) | 2 (1) | 2 (1) | 2 (1) | 2 (1) | 3 (2) |
| SPG20_HUMAN  | SPG20_HUMAN  | Spartin                                                                                          | SPG20    | ☐ | 0 (0) | 0 (0) | 0 (0) | 0 (0) | 4 (3) | 4 (4) | 4 (3) | 4 (4) | 2 (2) | 1 (1) |
| ALDOC_HUMAN  | ALDOC_HUMAN  | Fructose-bisphosphate aldolase C                                                                 | ALDOC    | ☐ | 1 (1) | 1 (1) | 0 (0) | 1 (1) | 2 (1) | 4 (2) | 3 (2) | 2 (2) | 2 (2) | 3 (2) |
| PDE4D_HUMAN  | PDE4D_HUMAN  | cAMP-specific 3',5'-cyclic phosphodiesterase 4D                                                  | PDE4D    | ☐ | 0 (0) | 0 (0) | 0 (0) | 1 (1) | 2 (1) | 3 (3) | 3 (2) | 4 (3) | 4 (2) | 2 (2) |
| NDRG2_HUMAN  | NDRG2_HUMAN  | Protein NDRG2                                                                                    | NDRG2    | ☐ | 0 (0) | 0 (0) | 0 (0) | 0 (0) | 2 (2) | 6 (5) | 3 (2) | 3 (2) | 3 (2) | 2 (1) |
| CALU_HUMAN   | CALU_HUMAN   | Calumenin                                                                                        | CALU     | ☐ | 0 (0) | 0 (0) | 0 (0) | 0 (0) | 2 (2) | 2 (2) | 3 (3) | 6 (3) | 6 (3) | 0 (0) |
| STEAP1_HUMAN | STEAP1_HUMAN | Metalloreductase STEAP1                                                                          | STEAP1   | ☐ | 1 (1) | 2 (1) | 2 (1) | 1 (1) | 2 (1) | 2 (1) | 3 (2) | 2 (1) | 2 (1) | 2 (1) |
| MYOF_HUMAN   | MYOF_HUMAN   | Myoferlin                                                                                        | MYOF     | ☐ | 1 (1) | 2 (1) | 2 (1) | 2 (1) | 2 (1) | 2 (1) | 2 (1) | 2 (1) | 2 (1) | 2 (1) |
| SAC2_HUMAN   | SAC2_HUMAN   | Phosphatidylinositol phosphatase SAC2                                                            | INPP5F   | ☐ | 0 (0) | 0 (0) | 0 (0) | 1 (1) | 2 (2) | 4 (2) | 3 (3) | 3 (2) | 4 (2) | 2 (2) |
| ZN828_HUMAN  | ZN828_HUMAN  | Zinc finger protein 828                                                                          | ZNF828   | ☐ | 1 (1) | 0 (0) | 1 (1) | 3 (1) | 1 (1) | 2 (1) | 2 (1) | 4 (2) | 4 (3) | 0 (0) |
| HNRPK_HUMAN  | HNRPK_HUMAN  | Heterogeneous nuclear ribonucleoprotein K                                                        | HNRNPK   | ☐ | 0 (0) | 0 (0) | 0 (0) | 1 (1) | 2 (1) | 2 (1) | 2 (1) | 5 (3) | 4 (3) | 2 (1) |
| U520_HUMAN   | U520_HUMAN   | U5 small nuclear ribonucleoprotein 200 kDa helicase                                              | SNRNP200 | ☐ | 1 (1) | 0 (0) | 0 (0) | 1 (1) | 4 (2) | 3 (2) | 2 (1) | 2 (1) | 3 (2) | 2 (1) |
| SAP18_HUMAN  | SAP18_HUMAN  | Histone deacetylase complex subunit SAP18                                                        | SAP18    | ☐ | 0 (0) | 0 (0) | 0 (0) | 0 (0) | 4 (1) | 3 (2) | 1 (1) | 4 (2) | 6 (2) | 0 (0) |
| CLIC1_HUMAN  | CLIC1_HUMAN  | Chloride intracellular channel protein 1                                                         | CLIC1    | ☐ | 0 (0) | 0 (0) | 2 (1) | 2 (1) | 2 (1) | 2 (1) | 2 (1) | 2 (1) | 5 (1) | 1 (1) |
| LAP2_HUMAN   | LAP2_HUMAN   | Protein LAP2                                                                                     | ERBB2IP  | ☐ | 0 (0) | 0 (0) | 0 (0) | 0 (0) | 3 (2) | 4 (1) | 2 (1) | 4 (2) | 3 (1) | 2 (1) |
| SCAF8_HUMAN  | SCAF8_HUMAN  | --                                                                                               | --       | ☐ | 0 (0) | 0 (0) | 0 (0) | 1 (1) | 1 (1) | 2 (1) | 4 (2) | 5 (3) | 5 (2) | 0 (0) |
| B4DZW7_HUMAN | B4DZW7_HUMAN | cDNA FLJ54768, highly similar to Homo sapiens nuclear protein UKp68 , transcript variant 2, mRNA | NULL     | ☐ | 0 (0) | 0 (0) | 0 (0) | 0 (0) | 2 (1) | 2 (1) | 3 (2) | 4 (2) | 5 (1) | 2 (1) |
| ECI1_HUMAN   | ECI1_HUMAN   | --                                                                                               | --       | ☐ | 0 (0) | 1 (1) | 1 (1) | 2 (2) | 4 (1) | 3 (1) | 1 (1) | 2 (1) | 3 (1) | 0 (0) |
| FXR1_HUMAN   | FXR1_HUMAN   | Fragile X mental retardation syndrome-related protein 1                                          | FXR1     | ☐ | 0 (0) | 0 (0) | 0 (0) | 2 (1) | 0 (0) | 2 (1) | 3 (1) | 4 (1) | 3 (1) | 3 (1) |
| GTF2I_HUMAN  | GTF2I_HUMAN  | General transcription factor II-I                                                                | GTF2I    | ☐ | 0 (0) | 0 (0) | 0 (0) | 2 (1) | 4 (1) | 2 (1) | 1 (1) | 2 (1) | 4 (1) | 2 (1) |
| HSPB1_HUMAN  | HSPB1_HUMAN  | Heat shock protein beta-1                                                                        | HSPB1    | ☐ | 0 (0) | 1 (1) | 1 (1) | 4 (1) | 2 (1) | 2 (1) | 2 (1) | 2 (1) | 2 (1) | 1 (1) |
| SP110_HUMAN  | SP110_HUMAN  | Sp110 nuclear body protein                                                                       | SP110    | ☐ | 0 (0) | 0 (0) | 0 (0) | 0 (0) | 4 (2) | 5 (2) | 3 (2) | 1 (1) | 0 (0) | 4 (2) |
| EFR3A_HUMAN  | EFR3A_HUMAN  | Protein EFR3 homolog A                                                                           | EFR3A    | ☐ | 2 (1) | 2 (1) | 1 (1) | 2 (1) | 3 (1) | 2 (1) | 2 (1) | 1 (1) | 0 (0) | 2 (1) |
| BET1_HUMAN   | BET1_HUMAN   | BET1 homolog                                                                                     | BET1     | ☐ | 0 (0) | 1 (1) | 2 (1) | 2 (1) | 2 (1) | 2 (1) | 2 (1) | 2 (1) | 2 (1) | 2 (1) |
| ZCCHV_HUMAN  | ZCCHV_HUMAN  | Zinc finger CCCH-type antiviral protein 1                                                        | ZC3HAV1  | ☐ | 0 (0) | 0 (0) | 0 (0) | 0 (0) | 3 (2) | 4 (2) | 2 (1) | 2 (1) | 3 (2) | 3 (2) |
| GNL1_HUMAN   | GNL1_HUMAN   | Guanine nucleotide-binding protein-like 1                                                        | GNL1     | ☐ | 0 (0) | 0 (0) | 0 (0) | 0 (0) | 0 (0) | 4 (2) | 5 (2) | 4 (1) | 4 (1) | 0 (0) |
| RRP12_HUMAN  | RRP12_HUMAN  | RRP12-like protein                                                                               | RRP12    | ☐ | 0 (0) | 0 (0) | 0 (0) | 0 (0) | 4 (1) | 3 (2) | 3 (2) | 2 (1) | 2 (1) | 3 (2) |

|                |                |                                                                            |           |                          |       |       |       |       |       |       |       |       |       |       |
|----------------|----------------|----------------------------------------------------------------------------|-----------|--------------------------|-------|-------|-------|-------|-------|-------|-------|-------|-------|-------|
| WDHD1_HUMAN    | WDHD1_HUMAN    | WD repeat and HMG-box DNA-binding protein 1                                | WDHD1     | <input type="checkbox"/> | 0 (0) | 0 (0) | 0 (0) | 0 (0) | 2 (1) | 2 (1) | 3 (2) | 4 (2) | 4 (2) | 2 (1) |
| EP400_HUMAN    | EP400_HUMAN    | E1A-binding protein p400                                                   | EP400     | <input type="checkbox"/> | 0 (0) | 0 (0) | 0 (0) | 2 (1) | 1 (1) | 2 (2) | 3 (2) | 4 (2) | 3 (2) | 2 (2) |
| UBR5_HUMAN     | UBR5_HUMAN     | E3 ubiquitin-protein ligase UBR5                                           | UBR5      | <input type="checkbox"/> | 2 (1) | 2 (1) | 2 (1) | 2 (1) | 2 (1) | 2 (1) | 1 (1) | 1 (1) | 2 (1) | 1 (1) |
| HS90A_HUMAN    | HS90A_HUMAN    | Heat shock protein HSP 90-alpha                                            | HSP90AA1  | <input type="checkbox"/> | 0 (0) | 0 (0) | 0 (0) | 0 (0) | 3 (1) | 3 (1) | 3 (1) | 3 (1) | 3 (1) | 2 (1) |
| DPOE1_HUMAN    | DPOE1_HUMAN    | DNA polymerase epsilon catalytic subunit A                                 | POLE      | <input type="checkbox"/> | 0 (0) | 0 (0) | 1 (1) | 0 (0) | 2 (1) | 2 (1) | 3 (2) | 3 (2) | 4 (2) | 2 (1) |
| CDC42_HUMAN    | CDC42_HUMAN    | Cell division control protein 42 homolog                                   | CDC42     | <input type="checkbox"/> | 0 (0) | 1 (1) | 1 (1) | 2 (1) | 2 (1) | 2 (1) | 2 (1) | 2 (1) | 2 (1) | 2 (1) |
| SPT5H_HUMAN    | SPT5H_HUMAN    | Transcription elongation factor SPT5                                       | SUPT5H    | <input type="checkbox"/> | 0 (0) | 0 (0) | 0 (0) | 0 (0) | 0 (0) | 1 (1) | 4 (2) | 5 (3) | 6 (4) | 0 (0) |
| ZCHC8_HUMAN    | ZCHC8_HUMAN    | Zinc finger CCHC domain-containing protein 8                               | ZCCHC8    | <input type="checkbox"/> | 0 (0) | 0 (0) | 0 (0) | 0 (0) | 0 (0) | 2 (1) | 2 (1) | 6 (3) | 6 (3) | 0 (0) |
| VAMP3_HUMAN    | VAMP3_HUMAN    | Vesicle-associated membrane protein 3                                      | VAMP3     | <input type="checkbox"/> | 0 (0) | 0 (0) | 0 (0) | 0 (0) | 4 (1) | 2 (1) | 1 (1) | 4 (1) | 4 (1) | 1 (1) |
| GBF1_HUMAN     | GBF1_HUMAN     | Golgi-specific brefeldin A-resistance guanine nucleotide exchange factor 1 | GBF1      | <input type="checkbox"/> | 2 (1) | 3 (2) | 0 (0) | 1 (1) | 2 (1) | 3 (2) | 1 (1) | 2 (1) | 2 (1) | 0 (0) |
| TTF1_HUMAN     | TTF1_HUMAN     | Transcription termination factor 1                                         | TTF1      | <input type="checkbox"/> | 0 (0) | 0 (0) | 0 (0) | 2 (1) | 0 (0) | 0 (0) | 4 (2) | 6 (4) | 4 (3) | 0 (0) |
| ATPA_HUMAN     | ATPA_HUMAN     | ATP synthase subunit alpha, mitochondrial                                  | ATP5A1    | <input type="checkbox"/> | 0 (0) | 0 (0) | 1 (1) | 0 (0) | 2 (1) | 2 (1) | 2 (1) | 3 (1) | 3 (2) | 3 (2) |
| ZN692_HUMAN    | ZN692_HUMAN    | Zinc finger protein 692                                                    | ZNF692    | <input type="checkbox"/> | 0 (0) | 0 (0) | 0 (0) | 0 (0) | 3 (2) | 3 (2) | 3 (3) | 4 (2) | 2 (2) | 1 (1) |
| PPIA_HUMAN     | PPIA_HUMAN     | Peptidyl-prolyl cis-trans isomerase A                                      | PPIA      | <input type="checkbox"/> | 0 (0) | 0 (0) | 0 (0) | 0 (0) | 3 (2) | 3 (2) | 3 (2) | 2 (1) | 3 (2) | 2 (1) |
| PLIN5_HUMAN    | PLIN5_HUMAN    | Perilipin-5                                                                | PLIN5     | <input type="checkbox"/> | 1 (1) | 0 (0) | 2 (1) | 2 (1) | 2 (1) | 2 (1) | 1 (1) | 2 (1) | 2 (1) | 2 (1) |
| PURA_HUMAN     | PURA_HUMAN     | Transcriptional activator protein Pur-alpha                                | PURA      | <input type="checkbox"/> | 0 (0) | 0 (0) | 2 (1) | 5 (4) | 0 (0) | 0 (0) | 0 (0) | 1 (1) | 4 (3) | 0 (0) |
| RTF1_HUMAN     | RTF1_HUMAN     | RNA polymerase-associated protein RTF1 homolog                             | RTF1      | <input type="checkbox"/> | 0 (0) | 0 (0) | 0 (0) | 1 (1) | 1 (1) | 1 (1) | 2 (1) | 6 (3) | 4 (2) | 1 (1) |
| LRRF1_HUMAN    | LRRF1_HUMAN    | Leucine-rich repeat flightless-interacting protein 1                       | LRRFIP1   | <input type="checkbox"/> | 0 (0) | 0 (0) | 0 (0) | 0 (0) | 3 (2) | 2 (1) | 2 (1) | 3 (2) | 6 (3) | 0 (0) |
| KDIS_HUMAN     | KDIS_HUMAN     | Kinase D-interacting substrate of 220 kDa                                  | KIDINS220 | <input type="checkbox"/> | 0 (0) | 0 (0) | 0 (0) | 1 (1) | 2 (1) | 2 (1) | 2 (1) | 2 (1) | 3 (2) | 2 (1) |
| ABLM1_HUMAN    | ABLM1_HUMAN    | Actin-binding LIM protein 1                                                | ABLM1     | <input type="checkbox"/> | 0 (0) | 2 (1) | 1 (1) | 2 (1) | 2 (2) | 2 (1) | 1 (1) | 2 (2) | 3 (2) | 1 (1) |
| TRIP12_HUMAN   | TRIP12_HUMAN   | Probable E3 ubiquitin-protein ligase TRIP12                                | TRIP12    | <input type="checkbox"/> | 2 (1) | 2 (1) | 2 (1) | 4 (2) | 0 (0) | 0 (0) | 0 (0) | 3 (2) | 3 (1) | 0 (0) |
| SQSTM1_HUMAN   | SQSTM1_HUMAN   | Sequestosome-1                                                             | SQSTM1    | <input type="checkbox"/> | 0 (0) | 0 (0) | 0 (0) | 0 (0) | 2 (1) | 4 (3) | 2 (1) | 4 (2) | 4 (2) | 0 (0) |
| CLAP1_HUMAN    | CLAP1_HUMAN    | CLIP-associating protein 1                                                 | CLASP1    | <input type="checkbox"/> | 1 (1) | 0 (0) | 2 (1) | 1 (1) | 2 (1) | 4 (3) | 3 (3) | 2 (1) | 0 (0) | 1 (1) |
| RSF1_HUMAN     | RSF1_HUMAN     | Remodeling and spacing factor 1                                            | RSF1      | <input type="checkbox"/> | 0 (0) | 0 (0) | 1 (1) | 0 (0) | 0 (0) | 2 (2) | 4 (2) | 5 (5) | 4 (4) | 0 (0) |
| MRE11A_HUMAN   | MRE11A_HUMAN   | Double-strand break repair protein MRE11A                                  | MRE11A    | <input type="checkbox"/> | 0 (0) | 1 (1) | 3 (2) | 3 (2) | 2 (1) | 1 (1) | 0 (0) | 2 (1) | 2 (2) | 2 (1) |
| RAB32_HUMAN    | RAB32_HUMAN    | Ras-related protein Rab-32                                                 | RAB32     | <input type="checkbox"/> | 0 (0) | 0 (0) | 0 (0) | 0 (0) | 0 (0) | 4 (3) | 4 (2) | 4 (3) | 4 (3) | 0 (0) |
| MOES1_HUMAN    | MOES1_HUMAN    | Moesin                                                                     | MSN       | <input type="checkbox"/> | 0 (0) | 0 (0) | 0 (0) | 1 (1) | 2 (1) | 2 (1) | 2 (1) | 2 (1) | 2 (1) | 3 (2) |
| PACE1_HUMAN    | PACE1_HUMAN    | Protein-associating with the carboxyl-terminal domain of ezrin             | SCYL3     | <input type="checkbox"/> | 1 (1) | 1 (1) | 2 (1) | 0 (0) | 2 (2) | 2 (2) | 2 (2) | 2 (1) | 1 (1) | 2 (1) |
| UBE3A_HUMAN    | UBE3A_HUMAN    | Ubiquitin-protein ligase E3A                                               | UBE3A     | <input type="checkbox"/> | 0 (0) | 1 (1) | 1 (1) | 1 (1) | 2 (1) | 2 (1) | 1 (1) | 2 (1) | 3 (2) | 2 (1) |
| ARNT_HUMAN     | ARNT_HUMAN     | Aryl hydrocarbon receptor nuclear translocator                             | ARNT      | <input type="checkbox"/> | 0 (0) | 0 (0) | 0 (0) | 0 (0) | 5 (5) | 3 (2) | 3 (2) | 2 (2) | 1 (1) | 1 (1) |
| GAPVD1_HUMAN   | GAPVD1_HUMAN   | GTPase-activating protein and VPS9 domain-containing protein 1             | GAPVD1    | <input type="checkbox"/> | 0 (0) | 0 (0) | 0 (0) | 0 (0) | 2 (2) | 4 (2) | 3 (2) | 4 (2) | 1 (1) | 1 (1) |
| IFI16_HUMAN    | IFI16_HUMAN    | Gamma-interferon-inducible protein 16                                      | IFI16     | <input type="checkbox"/> | 0 (0) | 0 (0) | 0 (0) | 0 (0) | 1 (1) | 4 (3) | 1 (1) | 4 (3) | 3 (4) | 0 (0) |
| DPOLZ_HUMAN    | DPOLZ_HUMAN    | DNA polymerase zeta catalytic subunit                                      | REV3L     | <input type="checkbox"/> | 0 (0) | 0 (0) | 0 (0) | 0 (0) | 4 (2) | 2 (1) | 2 (1) | 1 (1) | 1 (3) | 3 (2) |
| BBX_HUMAN      | BBX_HUMAN      | HMG box transcription factor BBX                                           | BBX       | <input type="checkbox"/> | 0 (0) | 0 (0) | 0 (0) | 0 (0) | 1 (1) | 4 (2) | 4 (2) | 3 (2) | 3 (2) | 0 (0) |
| HSPA4_HUMAN    | HSPA4_HUMAN    | Heat shock 70 kDa protein 4                                                | HSPA4     | <input type="checkbox"/> | 0 (0) | 0 (0) | 0 (0) | 0 (0) | 2 (1) | 3 (2) | 2 (1) | 3 (2) | 3 (2) | 2 (1) |
| SYMPK_HUMAN    | SYMPK_HUMAN    | Symplekin                                                                  | SYMPK     | <input type="checkbox"/> | 0 (0) | 0 (0) | 0 (0) | 0 (0) | 0 (0) | 0 (0) | 2 (1) | 6 (3) | 7 (3) | 0 (0) |
| DIP2B_HUMAN    | DIP2B_HUMAN    | Disco-interacting protein 2 homolog B                                      | DIP2B     | <input type="checkbox"/> | 0 (0) | 0 (0) | 0 (0) | 1 (1) | 2 (1) | 2 (1) | 3 (3) | 3 (2) | 2 (1) | 2 (1) |
| BCL9_HUMAN     | BCL9_HUMAN     | B-cell CLL/lymphoma 9 protein                                              | BCL9      | <input type="checkbox"/> | 0 (0) | 0 (0) | 0 (0) | 0 (0) | 2 (1) | 3 (2) | 3 (2) | 2 (1) | 2 (1) | 3 (2) |
| RANBP9_HUMAN   | RANBP9_HUMAN   | Ran-binding protein 9                                                      | RANBP9    | <input type="checkbox"/> | 0 (0) | 0 (0) | 0 (0) | 0 (0) | 3 (2) | 5 (3) | 2 (2) | 3 (2) | 1 (1) | 1 (1) |
| UTP18_HUMAN    | UTP18_HUMAN    | U3 small nucleolar RNA-associated protein 18 homolog                       | UTP18     | <input type="checkbox"/> | 0 (0) | 0 (0) | 0 (0) | 0 (0) | 2 (1) | 3 (1) | 2 (2) | 4 (1) | 2 (1) | 2 (1) |
| ARHGAP11_HUMAN | ARHGAP11_HUMAN | Rho guanine nucleotide exchange factor 11                                  | ARHGAP11  | <input type="checkbox"/> | 0 (0) | 0 (0) | 0 (0) | 0 (0) | 2 (1) | 3 (2) | 2 (1) | 3 (2) | 2 (1) | 3 (2) |
| VCL_HUMAN      | VCL_HUMAN      | Vinculin                                                                   | VCL       | <input type="checkbox"/> | 2 (1) | 2 (2) | 1 (1) | 4 (2) | 1 (1) | 2 (1) | 1 (1) | 1 (1) | 0 (0) | 1 (1) |



|              |              |                                                                                               |           |                          |       |       |       |       |       |       |       |       |        |       |
|--------------|--------------|-----------------------------------------------------------------------------------------------|-----------|--------------------------|-------|-------|-------|-------|-------|-------|-------|-------|--------|-------|
| MORC3_HUMAN  | MORC3_HUMAN  | MORC family CW-type zinc finger protein 3                                                     | MORC3     | <input type="checkbox"/> | 0 (0) | 0 (0) | 0 (0) | 1 (1) | 1 (1) | 0 (0) | 1 (1) | 2 (2) | 10 (6) | 0 (0) |
| PACS1_HUMAN  | PACS1_HUMAN  | Phosphofurin acidic cluster sorting protein 1                                                 | PACS1     | <input type="checkbox"/> | 0 (0) | 0 (0) | 1 (1) | 2 (2) | 2 (1) | 2 (2) | 2 (2) | 2 (2) | 2 (1)  | 2 (2) |
| DCR1A_HUMAN  | DCR1A_HUMAN  | DNA cross-link repair 1A protein                                                              | DCLRE1A   | <input type="checkbox"/> | 1 (1) | 2 (1) | 3 (2) | 2 (2) | 2 (2) | 2 (2) | 0 (0) | 1 (1) | 1 (1)  | 1 (1) |
| ARI1A_HUMAN  | ARI1A_HUMAN  | AT-rich interactive domain-containing protein 1A                                              | ARID1A    | <input type="checkbox"/> | 0 (0) | 0 (0) | 0 (0) | 0 (0) | 3 (2) | 4 (2) | 4 (2) | 4 (3) | 0 (0)  | 0 (0) |
| AMRA1_HUMAN  | AMRA1_HUMAN  | Activating molecule in BECN1-regulated autophagy protein 1                                    | AMBRA1    | <input type="checkbox"/> | 0 (0) | 0 (0) | 0 (0) | 0 (0) | 5 (3) | 1 (1) | 0 (0) | 3 (2) | 2 (2)  | 4 (2) |
| PRUN2_HUMAN  | PRUN2_HUMAN  | Protein prune homolog 2                                                                       | PRUNE2    | <input type="checkbox"/> | 1 (1) | 0 (0) | 0 (0) | 2 (1) | 1 (1) | 2 (1) | 2 (1) | 2 (1) | 3 (2)  | 2 (1) |
| DCTN1_HUMAN  | DCTN1_HUMAN  | Dynactin subunit 1                                                                            | DCTN1     | <input type="checkbox"/> | 0 (0) | 1 (1) | 0 (0) | 1 (1) | 2 (1) | 2 (1) | 2 (1) | 2 (1) | 2 (1)  | 2 (1) |
| ADDG_HUMAN   | ADDG_HUMAN   | Gamma-adducin                                                                                 | ADD3      | <input type="checkbox"/> | 0 (0) | 0 (0) | 0 (0) | 0 (0) | 3 (1) | 2 (1) | 3 (1) | 3 (1) | 0 (0)  | 4 (2) |
| SEPT9_HUMAN  | SEPT9_HUMAN  | Septin-9                                                                                      | SEPT9     | <input type="checkbox"/> | 0 (0) | 0 (0) | 2 (2) | 1 (1) | 3 (2) | 2 (2) | 2 (1) | 2 (2) | 3 (2)  | 0 (0) |
| UBP2L_HUMAN  | UBP2L_HUMAN  | Ubiquitin-associated protein 2-like                                                           | UBAP2L    | <input type="checkbox"/> | 0 (0) | 2 (1) | 0 (0) | 2 (1) | 2 (1) | 1 (1) | 2 (1) | 2 (1) | 2 (1)  | 1 (1) |
| MTUS1_HUMAN  | MTUS1_HUMAN  | Microtubule-associated tumor suppressor 1                                                     | MTUS1     | <input type="checkbox"/> | 0 (0) | 0 (0) | 0 (0) | 0 (0) | 2 (1) | 2 (1) | 2 (1) | 2 (1) | 4 (1)  | 2 (1) |
| TFG_HUMAN    | TFG_HUMAN    | Protein TFG                                                                                   | TFG       | <input type="checkbox"/> | 0 (0) | 1 (1) | 2 (2) | 0 (0) | 1 (1) | 1 (1) | 2 (2) | 1 (1) | 4 (3)  | 2 (1) |
| NUSAP_HUMAN  | NUSAP_HUMAN  | Nucleolar and spindle-associated protein 1                                                    | NUSAP1    | <input type="checkbox"/> | 0 (0) | 0 (0) | 0 (0) | 0 (0) | 0 (0) | 4 (2) | 3 (2) | 4 (3) | 3 (2)  | 0 (0) |
| KPCD_HUMAN   | KPCD_HUMAN   | Protein kinase C delta type                                                                   | PRKCD     | <input type="checkbox"/> | 0 (0) | 1 (1) | 2 (1) | 2 (1) | 2 (1) | 1 (1) | 2 (1) | 0 (0) | 2 (1)  | 2 (1) |
| BRCA1_HUMAN  | BRCA1_HUMAN  | Breast cancer type 1 susceptibility protein                                                   | BRCA1     | <input type="checkbox"/> | 0 (0) | 0 (0) | 0 (0) | 0 (0) | 2 (1) | 4 (2) | 2 (1) | 2 (1) | 2 (1)  | 2 (1) |
| RPP29_HUMAN  | RPP29_HUMAN  | Ribonuclease P protein subunit p29                                                            | POP4      | <input type="checkbox"/> | 0 (0) | 0 (0) | 1 (1) | 1 (1) | 2 (1) | 2 (1) | 2 (1) | 2 (1) | 2 (1)  | 2 (1) |
| HIN1L_HUMAN  | HIN1L_HUMAN  | Putative HIN1-like protein                                                                    | HIN1L     | <input type="checkbox"/> | 1 (1) | 4 (1) | 1 (1) | 2 (1) | 0 (0) | 2 (1) | 1 (1) | 1 (1) | 2 (1)  | 0 (0) |
| LZTS1_HUMAN  | LZTS1_HUMAN  | Leucine zipper putative tumor suppressor 1                                                    | LZTS1     | <input type="checkbox"/> | 0 (0) | 1 (1) | 4 (1) | 2 (1) | 1 (1) | 3 (2) | 1 (1) | 1 (1) | 1 (1)  | 0 (0) |
| EEF1D_HUMAN  | EEF1D_HUMAN  | Elongation factor 1-delta                                                                     | EEF1D     | <input type="checkbox"/> | 0 (0) | 0 (0) | 0 (0) | 0 (0) | 3 (2) | 3 (2) | 2 (1) | 2 (1) | 2 (1)  | 2 (1) |
| TGS1_HUMAN   | TGS1_HUMAN   | Trimethylguanosine synthase                                                                   | TGS1      | <input type="checkbox"/> | 0 (0) | 0 (0) | 0 (0) | 0 (0) | 3 (1) | 3 (1) | 3 (1) | 1 (1) | 1 (1)  | 4 (1) |
| PCNP_HUMAN   | PCNP_HUMAN   | PEST proteolytic signal-containing nuclear protein                                            | PCNP      | <input type="checkbox"/> | 0 (0) | 0 (0) | 1 (1) | 2 (1) | 1 (1) | 2 (2) | 1 (1) | 3 (3) | 2 (1)  | 2 (2) |
| MYLK_HUMAN   | MYLK_HUMAN   | Myosin light chain kinase, smooth muscle                                                      | MYLK      | <input type="checkbox"/> | 0 (0) | 0 (0) | 0 (0) | 1 (1) | 1 (1) | 0 (0) | 1 (1) | 4 (3) | 7 (4)  | 0 (0) |
| COPB_HUMAN   | COPB_HUMAN   | Coatomer subunit beta                                                                         | COPB1     | <input type="checkbox"/> | 0 (0) | 0 (0) | 0 (0) | 0 (0) | 2 (1) | 4 (2) | 2 (1) | 2 (2) | 1 (1)  | 4 (2) |
| ARHG2_HUMAN  | ARHG2_HUMAN  | Rho guanine nucleotide exchange factor 2                                                      | ARHGEF2   | <input type="checkbox"/> | 0 (0) | 0 (0) | 0 (0) | 2 (1) | 2 (2) | 2 (1) | 2 (1) | 2 (2) | 2 (1)  | 2 (1) |
| MAP1S_HUMAN  | MAP1S_HUMAN  | Microtubule-associated protein 1S                                                             | MAP1S     | <input type="checkbox"/> | 0 (0) | 0 (0) | 0 (0) | 0 (0) | 2 (2) | 3 (3) | 2 (2) | 3 (3) | 0 (0)  | 4 (3) |
| PEAK1_HUMAN  | PEAK1_HUMAN  | --                                                                                            | --        | <input type="checkbox"/> | 0 (0) | 0 (0) | 0 (0) | 0 (0) | 3 (1) | 2 (2) | 4 (2) | 2 (1) | 1 (1)  | 2 (1) |
| ZMYM4_HUMAN  | ZMYM4_HUMAN  | Zinc finger MYM-type protein 4                                                                | ZMYM4     | <input type="checkbox"/> | 0 (0) | 0 (0) | 0 (0) | 0 (0) | 0 (0) | 0 (0) | 4 (3) | 4 (2) | 6 (4)  | 0 (0) |
| SNF5_HUMAN   | SNF5_HUMAN   | SWI/SNF-related matrix-associated actin-dependent regulator of chromatin subfamily B member 1 | SMARCB1   | <input type="checkbox"/> | 0 (0) | 0 (0) | 1 (1) | 0 (0) | 2 (1) | 2 (1) | 2 (1) | 3 (1) | 2 (1)  | 2 (1) |
| TTC1_HUMAN   | TTC1_HUMAN   | Tetratricopeptide repeat protein 1                                                            | TTC1      | <input type="checkbox"/> | 0 (0) | 0 (0) | 0 (0) | 0 (0) | 0 (0) | 1 (1) | 3 (2) | 4 (2) | 6 (1)  | 0 (0) |
| ILF2_HUMAN   | ILF2_HUMAN   | Interleukin enhancer-binding factor 2                                                         | ILF2      | <input type="checkbox"/> | 0 (0) | 0 (0) | 0 (0) | 1 (1) | 0 (0) | 1 (1) | 0 (0) | 4 (1) | 6 (2)  | 0 (0) |
| UIMC1_HUMAN  | UIMC1_HUMAN  | BRCA1-A complex subunit RAP80                                                                 | UIMC1     | <input type="checkbox"/> | 0 (0) | 0 (0) | 0 (0) | 0 (0) | 3 (3) | 1 (1) | 2 (1) | 2 (1) | 2 (2)  | 3 (3) |
| H90B3_HUMAN  | H90B3_HUMAN  | Putative heat shock protein HSP 90-beta-3                                                     | HSP90AB3P | <input type="checkbox"/> | 0 (0) | 0 (0) | 0 (0) | 1 (1) | 2 (1) | 2 (1) | 2 (1) | 2 (1) | 2 (1)  | 2 (1) |
| IMDH2_HUMAN  | IMDH2_HUMAN  | Inosine-5'-monophosphate dehydrogenase 2                                                      | IMPDH2    | <input type="checkbox"/> | 0 (0) | 0 (0) | 0 (0) | 0 (0) | 2 (1) | 2 (2) | 2 (1) | 2 (1) | 3 (2)  | 2 (1) |
| EPS15_HUMAN  | EPS15_HUMAN  | Epidermal growth factor receptor substrate 15                                                 | EPS15     | <input type="checkbox"/> | 0 (0) | 0 (0) | 0 (0) | 1 (1) | 2 (1) | 2 (1) | 2 (1) | 2 (1) | 2 (1)  | 2 (1) |
| 2A5B_HUMAN   | 2A5B_HUMAN   | Serine/threonine-protein phosphatase 2A 56 kDa regulatory subunit beta isoform                | PPP2R5B   | <input type="checkbox"/> | 0 (0) | 0 (0) | 0 (0) | 0 (0) | 3 (2) | 4 (3) | 1 (1) | 3 (2) | 0 (0)  | 2 (2) |
| HS905_HUMAN  | HS905_HUMAN  | Putative heat shock protein HSP 90-alpha A5                                                   | HSP90AA5P | <input type="checkbox"/> | 1 (1) | 0 (0) | 0 (0) | 0 (0) | 1 (1) | 2 (1) | 2 (1) | 3 (1) | 4 (1)  | 0 (0) |
| PASK_HUMAN   | PASK_HUMAN   | PAS domain-containing serine/threonine-protein kinase                                         | PASK      | <input type="checkbox"/> | 0 (0) | 0 (0) | 0 (0) | 0 (0) | 3 (2) | 2 (1) | 2 (1) | 2 (1) | 2 (1)  | 2 (1) |
| JIP4_HUMAN   | JIP4_HUMAN   | C-Jun-amino-terminal kinase-interacting protein 4                                             | SPAG9     | <input type="checkbox"/> | 4 (1) | 3 (1) | 3 (1) | 1 (1) | 1 (1) | 0 (0) | 0 (0) | 0 (0) | 1 (1)  | 0 (0) |
| E9PEH3_HUMAN | E9PEH3_HUMAN | --                                                                                            | --        | <input type="checkbox"/> | 0 (0) | 0 (0) | 0 (0) | 0 (0) | 2 (1) | 3 (3) | 2 (1) | 4 (3) | 0 (0)  | 2 (1) |
| SNX1_HUMAN   | SNX1_HUMAN   | Sorting nexin-1                                                                               | SNX1      | <input type="checkbox"/> | 2 (1) | 1 (1) | 2 (1) | 4 (2) | 1 (1) | 0 (0) | 0 (0) | 0 (0) | 1 (1)  | 2 (1) |
| NOL7_HUMAN   | NOL7_HUMAN   | Nucleolar protein 7                                                                           | NOL7      | <input type="checkbox"/> | 0 (0) | 1 (1) | 2 (1) | 0 (0) | 3 (2) | 3 (2) | 2 (2) | 0 (0) | 0 (0)  | 2 (2) |
| KRI1_HUMAN   | KRI1_HUMAN   | Protein KRI1 homolog                                                                          | KRI1      | <input type="checkbox"/> | 0 (0) | 0 (0) | 0 (0) | 1 (1) | 0 (0) | 2 (1) | 2 (1) | 3 (2) | 4 (2)  | 0 (0) |
| SRPK1_HUMAN  | SRPK1_HUMAN  | Serine/threonine-protein                                                                      | SRPK1     | <input type="checkbox"/> | 0 (0) | 0 (0) | 0 (0) | 0 (0) | 0 (0) | 0 (0) | 4 (2) | 2 (1) | 7 (4)  | 0 (0) |

|             |             |                                                                      |          |  |       |       |       |       |       |       |       |       |       |       |
|-------------|-------------|----------------------------------------------------------------------|----------|--|-------|-------|-------|-------|-------|-------|-------|-------|-------|-------|
| SRPK1_HUMAN | SRPK1_HUMAN | kinase SRPK1                                                         |          |  |       |       |       |       |       |       |       |       |       |       |
| LAT3_HUMAN  | LAT3_HUMAN  | Large neutral amino acids transporter small subunit 3                | SLC43A1  |  | 0 (0) | 0 (0) | 1 (1) | 2 (1) | 0 (0) | 2 (1) | 2 (2) | 2 (2) | 2 (1) | 2 (2) |
| AMPM1_HUMAN | AMPM1_HUMAN | Methionine aminopeptidase 1                                          | METAP1   |  | 0 (0) | 0 (0) | 0 (0) | 2 (1) | 0 (0) | 1 (1) | 2 (2) | 4 (3) | 4 (3) | 0 (0) |
| TRIP6_HUMAN | TRIP6_HUMAN | Thyroid receptor-interacting protein 6                               | TRIP6    |  | 1 (1) | 0 (0) | 1 (1) | 1 (1) | 2 (1) | 2 (1) | 2 (1) | 2 (1) | 1 (1) | 1 (1) |
| ZN462_HUMAN | ZN462_HUMAN | Zinc finger protein 462                                              | ZNF462   |  | 0 (0) | 0 (0) | 0 (0) | 0 (0) | 2 (1) | 3 (1) | 2 (1) | 2 (1) | 2 (2) | 2 (1) |
| RT29_HUMAN  | RT29_HUMAN  | 28S ribosomal protein S29, mitochondrial                             | DAP3     |  | 0 (0) | 0 (0) | 0 (0) | 0 (0) | 2 (1) | 2 (1) | 2 (2) | 3 (2) | 2 (2) | 2 (1) |
| XRN2_HUMAN  | XRN2_HUMAN  | 5'-3' exonuclease 2                                                  | XRN2     |  | 0 (0) | 0 (0) | 0 (0) | 2 (1) | 1 (1) | 2 (1) | 2 (1) | 2 (1) | 2 (1) | 2 (1) |
| GRL1A_HUMAN | GRL1A_HUMAN | Protein GRINL1A                                                      | GRINL1A  |  | 1 (1) | 0 (0) | 1 (1) | 0 (0) | 5 (4) | 0 (0) | 0 (0) | 0 (0) | 0 (0) | 5 (3) |
| TR150_HUMAN | TR150_HUMAN | Thyroid hormone receptor-associated protein 3                        | THRAP3   |  | 0 (0) | 0 (0) | 0 (0) | 0 (0) | 1 (1) | 5 (2) | 3 (2) | 2 (1) | 2 (2) | 0 (0) |
| NU153_HUMAN | NU153_HUMAN | Nuclear pore complex protein Nup153                                  | NUP153   |  | 0 (0) | 0 (0) | 0 (0) | 0 (0) | 3 (2) | 2 (1) | 2 (1) | 2 (1) | 2 (2) | 1 (1) |
| DEN2A_HUMAN | DEN2A_HUMAN | DENN domain-containing protein 2A                                    | DENND2A  |  | 0 (0) | 0 (0) | 0 (0) | 0 (0) | 2 (1) | 2 (1) | 2 (1) | 2 (1) | 2 (2) | 2 (1) |
| FACD2_HUMAN | FACD2_HUMAN | Fanconi anemia group D2 protein                                      | FANCD2   |  | 0 (0) | 0 (0) | 0 (0) | 0 (0) | 2 (1) | 2 (2) | 2 (1) | 3 (2) | 1 (1) | 2 (1) |
| F136A_HUMAN | F136A_HUMAN | Protein FAM136A                                                      | FAM136A  |  | 0 (0) | 0 (0) | 0 (0) | 0 (0) | 2 (1) | 2 (1) | 2 (1) | 2 (1) | 2 (1) | 2 (1) |
| TCPH_HUMAN  | TCPH_HUMAN  | T-complex protein 1 subunit eta                                      | CCT7     |  | 0 (0) | 2 (1) | 1 (1) | 2 (1) | 2 (1) | 2 (2) | 1 (1) | 1 (1) | 1 (1) | 0 (0) |
| DUS3L_HUMAN | DUS3L_HUMAN | tRNA-dihydrouridine synthase 3-like                                  | DUS3L    |  | 0 (0) | 0 (0) | 0 (0) | 0 (0) | 2 (1) | 2 (1) | 2 (2) | 2 (2) | 2 (2) | 2 (1) |
| FOXO3_HUMAN | FOXO3_HUMAN | Forkhead box protein O3                                              | FOXO3    |  | 0 (0) | 0 (0) | 0 (0) | 1 (1) | 0 (0) | 3 (2) | 2 (1) | 4 (2) | 2 (2) | 0 (0) |
| PI51C_HUMAN | PI51C_HUMAN | Phosphatidylinositol-4-phosphate 5-kinase type-1 gamma               | PIP5K1C  |  | 0 (0) | 0 (0) | 0 (0) | 0 (0) | 3 (2) | 3 (2) | 0 (0) | 2 (2) | 1 (1) | 3 (3) |
| DDX17_HUMAN | DDX17_HUMAN | Probable ATP-dependent RNA helicase DDX17                            | DDX17    |  | 0 (0) | 1 (1) | 1 (1) | 2 (1) | 0 (0) | 2 (1) | 2 (1) | 2 (1) | 2 (1) | 0 (0) |
| LAP2A_HUMAN | LAP2A_HUMAN | Lamina-associated polypeptide 2, isoform alpha                       | TMPO     |  | 0 (0) | 0 (0) | 0 (0) | 1 (3) | 0 (0) | 0 (0) | 1 (1) | 4 (4) | 4 (3) | 0 (0) |
| SC16A_HUMAN | SC16A_HUMAN | Protein transport protein Sec16A                                     | SEC16A   |  | 1 (1) | 1 (1) | 2 (1) | 0 (0) | 3 (3) | 2 (2) | 0 (0) | 1 (1) | 0 (0) | 2 (2) |
| SF3B1_HUMAN | SF3B1_HUMAN | Splicing factor 3B subunit 1                                         | SF3B1    |  | 0 (0) | 0 (0) | 0 (0) | 0 (0) | 1 (1) | 2 (1) | 2 (1) | 4 (3) | 1 (1) | 2 (1) |
| GEMI_HUMAN  | GEMI_HUMAN  | Geminin                                                              | GMNN     |  | 0 (0) | 0 (0) | 0 (0) | 1 (1) | 2 (1) | 2 (1) | 2 (1) | 0 (0) | 1 (2) | 2 (1) |
| ACTN4_HUMAN | ACTN4_HUMAN | Alpha-actinin-4                                                      | ACTN4    |  | 0 (0) | 0 (0) | 0 (0) | 0 (0) | 2 (1) | 2 (1) | 2 (1) | 2 (1) | 3 (2) | 1 (1) |
| GCP3_HUMAN  | GCP3_HUMAN  | Gamma-tubulin complex component 3                                    | TUBGCP3  |  | 0 (0) | 1 (1) | 0 (0) | 0 (0) | 2 (2) | 2 (1) | 2 (1) | 2 (1) | 1 (1) | 2 (1) |
| RREB1_HUMAN | RREB1_HUMAN | Ras-responsive element-binding protein 1                             | RREB1    |  | 0 (0) | 0 (0) | 0 (0) | 5 (2) | 0 (0) | 1 (1) | 0 (0) | 3 (2) | 3 (2) | 0 (0) |
| RM13_HUMAN  | RM13_HUMAN  | 39S ribosomal protein L13, mitochondrial                             | MRPL13   |  | 0 (0) | 0 (0) | 0 (0) | 0 (0) | 1 (1) | 3 (1) | 3 (1) | 2 (1) | 1 (1) | 2 (1) |
| RED1_HUMAN  | RED1_HUMAN  | Double-stranded RNA-specific editase 1                               | ADARB1   |  | 0 (0) | 0 (0) | 0 (0) | 0 (0) | 1 (1) | 1 (1) | 2 (1) | 4 (1) | 4 (1) | 0 (0) |
| M21D1_HUMAN | M21D1_HUMAN | --                                                                   | --       |  | 0 (0) | 0 (0) | 0 (0) | 0 (0) | 0 (0) | 2 (1) | 0 (0) | 2 (1) | 4 (3) | 0 (0) |
| PCX3_HUMAN  | PCX3_HUMAN  | Pecanex-like protein 3                                               | PCNXL3   |  | 0 (0) | 0 (0) | 0 (0) | 0 (0) | 2 (1) | 2 (1) | 2 (1) | 2 (2) | 2 (2) | 2 (1) |
| RUBIC_HUMAN | RUBIC_HUMAN | Run domain Beclin-1 interacting and cysteine-rich containing protein | KIAA0226 |  | 0 (0) | 0 (0) | 0 (0) | 0 (0) | 3 (2) | 2 (2) | 2 (2) | 1 (1) | 0 (0) | 3 (2) |
| ANLN_HUMAN  | ANLN_HUMAN  | Actin-binding protein anillin                                        | ANLN     |  | 0 (0) | 1 (1) | 1 (1) | 1 (1) | 1 (1) | 5 (3) | 1 (1) | 2 (2) | 0 (0) | 0 (0) |
| RFA1_HUMAN  | RFA1_HUMAN  | Replication protein A 70 kDa DNA-binding subunit                     | RPA1     |  | 0 (0) | 0 (0) | 0 (0) | 0 (0) | 2 (2) | 3 (2) | 0 (0) | 3 (3) | 2 (1) | 2 (2) |
| ABCA7_HUMAN | ABCA7_HUMAN | ATP-binding cassette subfamily A member 7                            | ABCA7    |  | 0 (0) | 1 (1) | 0 (0) | 0 (0) | 2 (1) | 2 (1) | 2 (1) | 2 (1) | 2 (1) | 1 (1) |
| RAD18_HUMAN | RAD18_HUMAN | E3 ubiquitin-protein ligase RAD18                                    | RAD18    |  | 0 (0) | 0 (0) | 0 (0) | 0 (0) | 2 (2) | 2 (1) | 2 (1) | 2 (1) | 2 (1) | 2 (2) |
| SPAG5_HUMAN | SPAG5_HUMAN | Sperm-associated antigen 5                                           | SPAG5    |  | 0 (0) | 0 (0) | 0 (0) | 0 (0) | 2 (1) | 2 (1) | 2 (1) | 2 (1) | 2 (1) | 2 (1) |
| UBP5_HUMAN  | UBP5_HUMAN  | Ubiquitin carboxyl-terminal hydrolase 5                              | USP5     |  | 0 (0) | 0 (0) | 0 (0) | 0 (0) | 2 (1) | 2 (1) | 2 (1) | 2 (1) | 2 (1) | 2 (1) |
| HNRPF_HUMAN | HNRPF_HUMAN | Heterogeneous nuclear ribonucleoprotein F                            | HNRNPF   |  | 0 (0) | 0 (0) | 0 (0) | 1 (1) | 1 (1) | 1 (1) | 2 (1) | 2 (1) | 4 (1) | 0 (0) |
| PACS2_HUMAN | PACS2_HUMAN | Phosphofurin acidic cluster sorting protein 2                        | PACS2    |  | 2 (2) | 0 (0) | 1 (1) | 1 (1) | 3 (3) | 1 (1) | 0 (0) | 1 (1) | 2 (2) | 1 (1) |
| PKN2_HUMAN  | PKN2_HUMAN  | Serine/threonine-protein kinase N2                                   | PKN2     |  | 1 (1) | 0 (0) | 2 (1) | 1 (1) | 2 (1) | 2 (1) | 2 (1) | 0 (0) | 0 (0) | 2 (1) |
| ACTA_HUMAN  | ACTA_HUMAN  | Actin, aortic smooth muscle                                          | ACTA2    |  | 0 (0) | 0 (0) | 0 (0) | 0 (0) | 2 (1) | 2 (1) | 2 (1) | 2 (1) | 2 (1) | 1 (1) |
| APC_HUMAN   | APC_HUMAN   | Adenomatous polyposis coli protein                                   | APC      |  | 0 (0) | 0 (0) | 0 (0) | 0 (0) | 2 (1) | 2 (1) | 2 (1) | 2 (1) | 1 (1) | 2 (2) |
| RPGF6_HUMAN | RPGF6_HUMAN | Rap guanine nucleotide exchange factor 6                             | RAPGEF6  |  | 1 (1) | 0 (0) | 0 (0) | 0 (0) | 3 (1) | 1 (1) | 1 (1) | 0 (0) | 1 (1) | 4 (3) |
| U2AF1_HUMAN | U2AF1_HUMAN | Splicing factor U2AF 35 kDa subunit                                  | U2AF1    |  | 0 (0) | 0 (0) | 0 (0) | 0 (0) | 1 (1) | 2 (1) | 2 (1) | 2 (1) | 2 (1) | 2 (1) |
| G6PD_HUMAN  | G6PD_HUMAN  | Glucose-6-phosphate 1-dehydrogenase                                  | G6PD     |  | 0 (0) | 0 (0) | 1 (1) | 0 (0) | 2 (1) | 2 (1) | 1 (1) | 2 (1) | 1 (1) | 2 (1) |
|             |             | Dibacoma biosynthetic                                                | DMS1     |  | 0 (0) | 0 (0) | 0 (0) | 0 (0) | 0 (0) | 0 (0) | 1 (1) | 1 (1) | 1 (1) | 0 (0) |

|              |              |                                                           |          |                          |       |       |       |       |       |       |       |       |       |       |
|--------------|--------------|-----------------------------------------------------------|----------|--------------------------|-------|-------|-------|-------|-------|-------|-------|-------|-------|-------|
| BMS1_HUMAN   | BMS1_HUMAN   | ribosome biogenesis protein BMS1 homolog                  | BMS1     | <input type="checkbox"/> | 0 (0) | 0 (0) | 0 (0) | 0 (0) | 0 (0) | 0 (0) | 2 (1) | 2 (2) | 2 (2) | 0 (0) |
| TRY1_BOVINC  | TRY1_BOVINC  | --                                                        | --       | <input type="checkbox"/> | 0 (0) | 0 (0) | 0 (0) | 0 (0) | 2 (1) | 2 (1) | 2 (1) | 2 (2) | 1 (1) | 2 (1) |
| TM201_HUMAN  | TM201_HUMAN  | Transmembrane protein 201                                 | TMEM201  | <input type="checkbox"/> | 0 (0) | 0 (0) | 0 (0) | 0 (0) | 2 (2) | 2 (1) | 2 (1) | 2 (2) | 2 (1) | 1 (1) |
| CING_HUMAN   | CING_HUMAN   | Cingulin                                                  | CGN      | <input type="checkbox"/> | 0 (0) | 1 (1) | 2 (1) | 0 (0) | 1 (1) | 2 (1) | 1 (1) | 2 (1) | 0 (0) | 2 (1) |
| ZC11A_HUMAN  | ZC11A_HUMAN  | Zinc finger CCHH domain-containing protein 11A            | ZC3H11A  | <input type="checkbox"/> | 0 (0) | 0 (0) | 0 (0) | 0 (0) | 0 (0) | 1 (1) | 2 (1) | 4 (2) | 4 (2) | 0 (0) |
| ELYS_HUMAN   | ELYS_HUMAN   | Protein ELYS                                              | AHCTF1   | <input type="checkbox"/> | 0 (0) | 1 (1) | 1 (1) | 2 (2) | 0 (0) | 0 (0) | 0 (0) | 3 (3) | 4 (3) | 0 (0) |
| WNK1_HUMAN   | WNK1_HUMAN   | Serine/threonine-protein kinase WNK1                      | WNK1     | <input type="checkbox"/> | 0 (0) | 0 (0) | 0 (0) | 0 (0) | 0 (0) | 2 (1) | 2 (1) | 2 (1) | 4 (2) | 1 (1) |
| PSI11_HUMAN  | PSI11_HUMAN  | Tumor protein p53-inducible protein 11                    | TP53I11  | <input type="checkbox"/> | 0 (0) | 0 (0) | 0 (0) | 0 (0) | 1 (1) | 3 (1) | 3 (2) | 3 (1) | 1 (1) | 0 (0) |
| RL29_HUMAN   | RL29_HUMAN   | 60S ribosomal protein L29                                 | RPL29    | <input type="checkbox"/> | 0 (0) | 0 (0) | 2 (1) | 1 (1) | 2 (1) | 3 (2) | 1 (1) | 0 (0) | 0 (0) | 2 (2) |
| SND1_HUMAN   | SND1_HUMAN   | Staphylococcal nuclease domain-containing protein 1       | SND1     | <input type="checkbox"/> | 0 (0) | 0 (0) | 0 (0) | 0 (0) | 2 (1) | 2 (1) | 1 (1) | 2 (1) | 2 (1) | 2 (1) |
| FLNB_HUMAN   | FLNB_HUMAN   | Filamin-B                                                 | FLNB     | <input type="checkbox"/> | 0 (0) | 0 (0) | 0 (0) | 0 (0) | 2 (1) | 2 (1) | 2 (1) | 2 (1) | 1 (1) | 2 (1) |
| NOP56_HUMAN  | NOP56_HUMAN  | Nucleolar protein 56                                      | NOP56    | <input type="checkbox"/> | 0 (0) | 0 (0) | 0 (0) | 1 (1) | 2 (1) | 1 (1) | 1 (1) | 2 (1) | 2 (1) | 2 (1) |
| SF3B5_HUMAN  | SF3B5_HUMAN  | Splicing factor 3B subunit 5                              | SF3B5    | <input type="checkbox"/> | 0 (0) | 0 (0) | 2 (1) | 2 (1) | 0 (0) | 0 (0) | 0 (0) | 3 (2) | 4 (1) | 0 (0) |
| RRMJ3_HUMAN  | RRMJ3_HUMAN  | Putative rRNA methyltransferase 3                         | FTSJ3    | <input type="checkbox"/> | 2 (2) | 1 (1) | 0 (0) | 0 (0) | 2 (2) | 2 (2) | 0 (0) | 1 (1) | 1 (1) | 2 (1) |
| HS105_HUMAN  | HS105_HUMAN  | Heat shock protein 105 kDa                                | HSPH1    | <input type="checkbox"/> | 0 (0) | 0 (0) | 0 (0) | 0 (0) | 2 (1) | 2 (1) | 2 (1) | 2 (1) | 1 (1) | 2 (1) |
| RIC8A_HUMAN  | RIC8A_HUMAN  | Synembryn-A                                               | RIC8A    | <input type="checkbox"/> | 0 (0) | 0 (0) | 1 (1) | 2 (2) | 0 (0) | 2 (2) | 2 (2) | 2 (2) | 2 (2) | 0 (0) |
| CWC15_HUMAN  | CWC15_HUMAN  | Protein CWC15 homolog                                     | CWC15    | <input type="checkbox"/> | 0 (0) | 0 (0) | 0 (0) | 1 (1) | 2 (1) | 1 (1) | 2 (1) | 1 (1) | 2 (1) | 2 (1) |
| LIMA1_HUMAN  | LIMA1_HUMAN  | LIM domain and actin-binding protein 1                    | LIMA1    | <input type="checkbox"/> | 0 (0) | 0 (0) | 0 (0) | 0 (0) | 2 (1) | 2 (1) | 2 (1) | 2 (1) | 2 (2) | 1 (1) |
| RNF6_HUMAN   | RNF6_HUMAN   | E3 ubiquitin-protein ligase RNF6                          | RNF6     | <input type="checkbox"/> | 0 (0) | 0 (0) | 0 (0) | 0 (0) | 2 (1) | 3 (3) | 2 (1) | 2 (1) | 0 (0) | 2 (2) |
| SPIR1_HUMAN  | SPIR1_HUMAN  | Protein spire homolog 1                                   | SPIRE1   | <input type="checkbox"/> | 0 (0) | 0 (0) | 0 (0) | 0 (0) | 3 (1) | 2 (1) | 2 (1) | 1 (1) | 0 (0) | 2 (1) |
| BOREA_HUMAN  | BOREA_HUMAN  | Borealin                                                  | CDCA8    | <input type="checkbox"/> | 0 (0) | 0 (0) | 0 (0) | 0 (0) | 4 (3) | 1 (1) | 2 (1) | 3 (2) | 0 (0) | 0 (0) |
| DIEXF_HUMAN  | DIEXF_HUMAN  | --                                                        | --       | <input type="checkbox"/> | 1 (1) | 1 (1) | 2 (1) | 2 (1) | 0 (0) | 0 (0) | 0 (0) | 1 (1) | 2 (1) | 1 (1) |
| WDR46_HUMAN  | WDR46_HUMAN  | WD repeat-containing protein 46                           | WDR46    | <input type="checkbox"/> | 0 (0) | 0 (0) | 0 (0) | 2 (1) | 0 (0) | 0 (0) | 0 (0) | 4 (1) | 4 (1) | 0 (0) |
| VP13B_HUMAN  | VP13B_HUMAN  | Vacuolar protein sorting-associated protein 13B           | VPS13B   | <input type="checkbox"/> | 0 (0) | 0 (0) | 1 (1) | 1 (1) | 2 (2) | 2 (1) | 2 (1) | 0 (0) | 1 (1) | 1 (1) |
| TOP2B_HUMAN  | TOP2B_HUMAN  | DNA topoisomerase 2-beta                                  | TOP2B    | <input type="checkbox"/> | 0 (0) | 0 (0) | 0 (0) | 0 (0) | 1 (1) | 1 (1) | 1 (1) | 3 (1) | 4 (1) | 0 (0) |
| WDR37_HUMAN  | WDR37_HUMAN  | WD repeat-containing protein 37                           | WDR37    | <input type="checkbox"/> | 0 (0) | 0 (0) | 0 (0) | 0 (0) | 1 (1) | 5 (3) | 1 (1) | 1 (1) | 2 (1) | 0 (0) |
| S19A2_HUMAN  | S19A2_HUMAN  | Thiamine transporter 1                                    | SLC19A2  | <input type="checkbox"/> | 0 (0) | 0 (0) | 1 (1) | 0 (0) | 0 (0) | 2 (1) | 2 (1) | 2 (1) | 2 (1) | 1 (1) |
| RS3_HUMAN    | RS3_HUMAN    | 40S ribosomal protein S3                                  | RPS3     | <input type="checkbox"/> | 0 (0) | 0 (0) | 0 (0) | 0 (0) | 1 (1) | 2 (1) | 1 (1) | 3 (1) | 1 (1) | 2 (1) |
| SMRC2_HUMAN  | SMRC2_HUMAN  | SWI/SNF complex subunit SMARCC2                           | SMARCC2  | <input type="checkbox"/> | 0 (0) | 0 (0) | 0 (0) | 5 (3) | 0 (0) | 0 (0) | 0 (0) | 2 (1) | 3 (2) | 0 (0) |
| RUND1_HUMAN  | RUND1_HUMAN  | RUN domain-containing protein 1                           | RUNDC1   | <input type="checkbox"/> | 1 (1) | 0 (0) | 1 (1) | 0 (0) | 2 (1) | 1 (1) | 0 (0) | 2 (1) | 1 (1) | 2 (1) |
| ACTN1_HUMAN  | ACTN1_HUMAN  | Alpha-actinin-1                                           | ACTN1    | <input type="checkbox"/> | 0 (0) | 0 (0) | 0 (0) | 3 (2) | 0 (0) | 0 (0) | 0 (0) | 1 (1) | 6 (4) | 0 (0) |
| Q05D56_HUMAN | Q05D56_HUMAN | SMARCAD1 protein (Fragment)                               | SMARCAD1 | <input type="checkbox"/> | 0 (0) | 0 (0) | 0 (0) | 0 (0) | 1 (1) | 1 (1) | 4 (1) | 2 (2) | 1 (1) | 1 (1) |
| MBB1A_HUMAN  | MBB1A_HUMAN  | Myb-binding protein 1A                                    | MYBBP1A  | <input type="checkbox"/> | 0 (0) | 0 (0) | 0 (0) | 0 (0) | 0 (0) | 2 (2) | 1 (1) | 4 (2) | 1 (2) | 0 (0) |
| ELAV1_HUMAN  | ELAV1_HUMAN  | ELAV-like protein 1                                       | ELAVL1   | <input type="checkbox"/> | 0 (0) | 0 (0) | 0 (0) | 0 (0) | 0 (0) | 1 (1) | 0 (0) | 3 (1) | 5 (2) | 0 (0) |
| THOC2_HUMAN  | THOC2_HUMAN  | THO complex subunit 2                                     | THOC2    | <input type="checkbox"/> | 0 (0) | 0 (0) | 0 (0) | 0 (0) | 0 (0) | 0 (0) | 2 (1) | 5 (2) | 3 (2) | 0 (0) |
| EP300_HUMAN  | EP300_HUMAN  | Histone acetyltransferase p300                            | EP300    | <input type="checkbox"/> | 0 (0) | 0 (0) | 0 (0) | 0 (0) | 0 (0) | 0 (0) | 1 (1) | 3 (2) | 6 (4) | 0 (0) |
| MD2BP_HUMAN  | MD2BP_HUMAN  | MAD2L1-binding protein                                    | MAD2L1BP | <input type="checkbox"/> | 0 (0) | 0 (0) | 0 (0) | 0 (0) | 0 (0) | 0 (0) | 1 (1) | 4 (2) | 3 (4) | 0 (0) |
| PHF3_HUMAN   | PHF3_HUMAN   | PHD finger protein 3                                      | PHF3     | <input type="checkbox"/> | 0 (0) | 0 (0) | 0 (0) | 0 (0) | 0 (0) | 0 (0) | 1 (1) | 3 (2) | 5 (3) | 1 (1) |
| ABCB6_HUMAN  | ABCB6_HUMAN  | ATP-binding cassette sub-family B member 6, mitochondrial | ABCB6    | <input type="checkbox"/> | 0 (0) | 0 (0) | 1 (1) | 1 (1) | 1 (1) | 1 (1) | 2 (1) | 1 (1) | 2 (1) | 1 (1) |
| RECQ1_HUMAN  | RECQ1_HUMAN  | ATP-dependent DNA helicase Q1                             | RECQL    | <input type="checkbox"/> | 0 (0) | 0 (0) | 0 (0) | 0 (0) | 0 (0) | 0 (0) | 2 (1) | 2 (1) | 6 (3) | 0 (0) |
| RGAP1_HUMAN  | RGAP1_HUMAN  | Rac GTPase-activating protein 1                           | RACGAP1  | <input type="checkbox"/> | 0 (0) | 1 (1) | 2 (1) | 0 (0) | 1 (1) | 2 (1) | 3 (2) | 1 (1) | 0 (0) | 0 (0) |
| ZF161_HUMAN  | ZF161_HUMAN  | Zinc finger protein 161 homolog                           | ZFP161   | <input type="checkbox"/> | 0 (0) | 0 (0) | 0 (0) | 0 (0) | 0 (0) | 1 (1) | 0 (0) | 5 (3) | 4 (3) | 0 (0) |
| ZN192_HUMAN  | ZN192_HUMAN  | Zinc finger protein 192                                   | ZNF192   | <input type="checkbox"/> | 0 (0) | 0 (0) | 0 (0) | 0 (0) | 0 (0) | 1 (1) | 2 (2) | 2 (2) | 5 (3) | 0 (0) |
| CNOT2_HUMAN  | CNOT2_HUMAN  | CCR4-NOT transcription complex subunit 2                  | CNOT2    | <input type="checkbox"/> | 0 (0) | 1 (1) | 0 (0) | 0 (0) | 1 (1) | 1 (1) | 2 (1) | 1 (1) | 2 (2) | 2 (1) |
| LSM11_HUMAN  | LSM11_HUMAN  | U7 snRNA-associated Sm-like protein LSM11                 | LSM11    | <input type="checkbox"/> | 0 (0) | 0 (0) | 0 (0) | 0 (0) | 1 (1) | 1 (1) | 1 (1) | 2 (2) | 1 (2) | 2 (2) |
| GRP75_HUMAN  | GRP75_HUMAN  | Stress-70 protein, mitochondrial                          | HSPA9    | <input type="checkbox"/> | 0 (0) | 0 (0) | 0 (0) | 0 (0) | 2 (1) | 2 (1) | 2 (1) | 2 (1) | 2 (1) | 0 (0) |
| HS71L_HUMAN  | HS71L_HUMAN  | Heat shock 70 kDa protein 1-like                          | HSPA1L   | <input type="checkbox"/> | 0 (0) | 0 (0) | 0 (0) | 0 (0) | 2 (2) | 2 (1) | 2 (2) | 1 (1) | 1 (1) | 2 (1) |
| VPS26A_HUMAN | VPS26A_HUMAN | Vacuolar protein sorting-                                 | VPS26A   | <input type="checkbox"/> | 0 (0) | 2 (1) | 0 (0) | 0 (0) | 2 (1) | 1 (1) | 2 (1) | 0 (0) | 2 (1) | 1 (1) |

|              |              |                                                                                                                          |          |   |       |       |       |       |       |       |       |       |       |       |
|--------------|--------------|--------------------------------------------------------------------------------------------------------------------------|----------|---|-------|-------|-------|-------|-------|-------|-------|-------|-------|-------|
| VF20A_HUMAN  | VF20A_HUMAN  | associated protein 26A                                                                                                   |          |   |       |       |       |       |       |       |       |       |       |       |
| F91A1_HUMAN  | F91A1_HUMAN  | Protein FAM91A1                                                                                                          | FAM91A1  | □ | 0 (0) | 0 (0) | 0 (0) | 0 (0) | 2 (1) | 2 (1) | 2 (1) | 1 (1) | 1 (1) | 2 (1) |
| CCNT2_HUMAN  | CCNT2_HUMAN  | Cyclin-T2                                                                                                                | CCNT2    | □ | 0 (0) | 0 (0) | 0 (0) | 0 (0) | 2 (1) | 2 (2) | 1 (1) | 3 (2) | 1 (1) | 1 (1) |
| APC1_HUMAN   | APC1_HUMAN   | Anaphase-promoting complex subunit 1                                                                                     | ANAPC1   | □ | 0 (0) | 0 (0) | 0 (0) | 0 (0) | 2 (1) | 0 (0) | 2 (1) | 2 (1) | 3 (2) | 1 (1) |
| VIGLN_HUMAN  | VIGLN_HUMAN  | Vigilin                                                                                                                  | HDLBP    | □ | 0 (0) | 0 (0) | 0 (0) | 1 (1) | 1 (1) | 2 (1) | 2 (1) | 1 (1) | 2 (1) | 1 (1) |
| B2RE15_HUMAN | B2RE15_HUMAN | cDNA, FLJ96871, highly similar to Homo sapiens ADP-ribosylation-like factor 6 interacting protein 4(ARL6IP4), mRNA       | NULL     | □ | 0 (0) | 0 (0) | 0 (0) | 0 (0) | 2 (2) | 2 (1) | 2 (1) | 2 (2) | 0 (0) | 2 (1) |
| CNDH2_HUMAN  | CNDH2_HUMAN  | Condensin-2 complex subunit H2                                                                                           | NCAPH2   | □ | 0 (0) | 0 (0) | 2 (1) | 2 (1) | 0 (0) | 1 (1) | 1 (1) | 2 (1) | 2 (1) | 0 (0) |
| LSM2_HUMAN   | LSM2_HUMAN   | U6 snRNA-associated Sm-like protein LSM2                                                                                 | LSM2     | □ | 0 (0) | 0 (0) | 0 (0) | 1 (1) | 0 (0) | 0 (0) | 0 (0) | 4 (1) | 4 (1) | 0 (0) |
| FLNA_HUMAN   | FLNA_HUMAN   | Filamin-A                                                                                                                | FLNA     | □ | 0 (0) | 0 (0) | 0 (0) | 1 (1) | 1 (1) | 1 (1) | 1 (1) | 2 (1) | 2 (1) | 1 (1) |
| FRM4A_HUMAN  | FRM4A_HUMAN  | FERM domain-containing protein 4A                                                                                        | FRMD4A   | □ | 0 (0) | 0 (0) | 0 (0) | 0 (0) | 1 (1) | 2 (2) | 0 (0) | 5 (4) | 1 (1) | 0 (0) |
| REQU_HUMAN   | REQU_HUMAN   | Zinc finger protein ubi-d4                                                                                               | DPF2     | □ | 0 (0) | 0 (0) | 0 (0) | 0 (0) | 1 (1) | 4 (2) | 0 (0) | 2 (1) | 2 (1) | 0 (0) |
| PCF11_HUMAN  | PCF11_HUMAN  | Pre-mRNA cleavage complex 2 protein Pcf11                                                                                | PCF11    | □ | 0 (0) | 0 (0) | 0 (0) | 0 (0) | 0 (0) | 0 (0) | 2 (1) | 3 (2) | 4 (2) | 0 (0) |
| HS90B_HUMAN  | HS90B_HUMAN  | Heat shock protein HSP 90-beta                                                                                           | HSP90AB1 | □ | 0 (0) | 0 (0) | 0 (0) | 0 (0) | 1 (1) | 2 (1) | 1 (1) | 2 (1) | 3 (2) | 0 (0) |
| NDRG3_HUMAN  | NDRG3_HUMAN  | Protein NDRG3                                                                                                            | NDRG3    | □ | 0 (0) | 0 (0) | 0 (0) | 0 (0) | 1 (1) | 2 (1) | 2 (2) | 2 (1) | 2 (1) | 0 (0) |
| BAZ1B_HUMAN  | BAZ1B_HUMAN  | Tyrosine-protein kinase BAZ1B                                                                                            | BAZ1B    | □ | 0 (0) | 0 (0) | 0 (0) | 0 (0) | 0 (0) | 0 (0) | 0 (0) | 1 (1) | 8 (7) | 0 (0) |
| LRC45_HUMAN  | LRC45_HUMAN  | Leucine-rich repeat-containing protein 45                                                                                | LRRC45   | □ | 0 (0) | 0 (0) | 0 (0) | 0 (0) | 1 (1) | 2 (2) | 2 (1) | 2 (1) | 2 (1) | 0 (0) |
| KC1D_HUMAN   | KC1D_HUMAN   | Casein kinase I isoform delta                                                                                            | CSNK1D   | □ | 0 (0) | 0 (0) | 0 (0) | 0 (0) | 1 (1) | 2 (1) | 1 (1) | 2 (1) | 2 (1) | 1 (1) |
| RHG22_HUMAN  | RHG22_HUMAN  | Rho GTPase-activating protein 22                                                                                         | ARHGAP22 | □ | 0 (0) | 0 (0) | 0 (0) | 0 (0) | 1 (1) | 2 (1) | 1 (1) | 3 (1) | 2 (1) | 0 (0) |
| KIF11_HUMAN  | KIF11_HUMAN  | Kinesin-like protein KIF11                                                                                               | KIF11    | □ | 0 (0) | 0 (0) | 0 (0) | 0 (0) | 1 (1) | 1 (1) | 2 (1) | 2 (1) | 2 (1) | 1 (1) |
| CA055_HUMAN  | CA055_HUMAN  | UPF0667 protein C1orf55                                                                                                  | C1orf55  | □ | 0 (0) | 0 (0) | 0 (0) | 0 (0) | 1 (1) | 2 (1) | 0 (0) | 3 (2) | 3 (2) | 0 (0) |
| SASH1_HUMAN  | SASH1_HUMAN  | SAM and SH3 domain-containing protein 1                                                                                  | SASH1    | □ | 0 (0) | 0 (0) | 0 (0) | 0 (0) | 1 (1) | 1 (1) | 1 (1) | 1 (1) | 4 (2) | 1 (1) |
| TCPE_HUMAN   | TCPE_HUMAN   | T-complex protein 1 subunit epsilon                                                                                      | CCT5     | □ | 0 (0) | 0 (0) | 0 (0) | 0 (0) | 2 (1) | 2 (1) | 2 (1) | 2 (1) | 0 (0) | 1 (1) |
| PP1R7_HUMAN  | PP1R7_HUMAN  | Protein phosphatase 1 regulatory subunit 7                                                                               | PPP1R7   | □ | 0 (0) | 0 (0) | 0 (0) | 0 (0) | 2 (1) | 2 (1) | 1 (1) | 3 (2) | 1 (1) | 0 (0) |
| MLL1_HUMAN   | MLL1_HUMAN   | Histone-lysine N-methyltransferase MLL                                                                                   | MLL      | □ | 0 (0) | 0 (0) | 0 (0) | 0 (0) | 2 (2) | 0 (0) | 0 (0) | 2 (1) | 3 (2) | 2 (2) |
| DDX21_HUMAN  | DDX21_HUMAN  | Nucleolar RNA helicase 2                                                                                                 | DDX21    | □ | 0 (0) | 0 (0) | 0 (0) | 0 (0) | 1 (1) | 0 (0) | 0 (0) | 5 (3) | 3 (2) | 0 (0) |
| CND3_HUMAN   | CND3_HUMAN   | Condensin complex subunit 3                                                                                              | NCAPG    | □ | 0 (0) | 0 (0) | 0 (0) | 0 (0) | 1 (1) | 2 (1) | 2 (1) | 0 (0) | 1 (1) | 3 (3) |
| OCAD1_HUMAN  | OCAD1_HUMAN  | OCIA domain-containing protein 1                                                                                         | OCIAD1   | □ | 0 (0) | 0 (0) | 0 (0) | 0 (0) | 2 (1) | 1 (1) | 2 (1) | 0 (0) | 2 (1) | 2 (1) |
| CN043_HUMAN  | CN043_HUMAN  | Uncharacterized protein C14orf43                                                                                         | C14orf43 | □ | 1 (1) | 0 (0) | 2 (1) | 0 (0) | 2 (1) | 1 (1) | 0 (0) | 1 (1) | 0 (0) | 2 (1) |
| A8K7U3_HUMAN | A8K7U3_HUMAN | cDNA FLJ77788                                                                                                            | NULL     | □ | 0 (0) | 0 (0) | 0 (0) | 2 (1) | 0 (0) | 1 (1) | 2 (1) | 2 (1) | 2 (1) | 0 (0) |
| ZCCHL_HUMAN  | ZCCHL_HUMAN  | Zinc finger CCCH-type antiviral protein 1-like                                                                           | ZC3HAV1L | □ | 0 (0) | 0 (0) | 1 (1) | 1 (1) | 0 (0) | 1 (1) | 2 (1) | 2 (1) | 2 (1) | 0 (0) |
| RUVB2_HUMAN  | RUVB2_HUMAN  | RuvB-like 2                                                                                                              | RUVBL2   | □ | 0 (0) | 0 (0) | 0 (0) | 1 (1) | 1 (1) | 1 (1) | 0 (0) | 3 (2) | 3 (2) | 0 (0) |
| RL35_HUMAN   | RL35_HUMAN   | 60S ribosomal protein L35                                                                                                | RPL35    | □ | 1 (1) | 1 (1) | 1 (1) | 0 (0) | 1 (1) | 2 (1) | 1 (1) | 1 (1) | 0 (0) | 1 (1) |
| BCR_HUMAN    | BCR_HUMAN    | Breakpoint cluster region protein                                                                                        | BCR      | □ | 0 (0) | 0 (0) | 2 (1) | 2 (1) | 0 (0) | 1 (1) | 0 (0) | 2 (2) | 2 (1) | 0 (0) |
| MYH9_HUMAN   | MYH9_HUMAN   | Myosin-9                                                                                                                 | MYH9     | □ | 0 (0) | 0 (0) | 0 (0) | 1 (1) | 1 (1) | 0 (0) | 0 (0) | 2 (1) | 3 (2) | 0 (0) |
| PLXC1_HUMAN  | PLXC1_HUMAN  | Plexin-C1                                                                                                                | PLXNC1   | □ | 0 (0) | 0 (0) | 0 (0) | 2 (2) | 0 (0) | 1 (1) | 1 (1) | 1 (1) | 4 (1) | 0 (0) |
| RADI_HUMAN   | RADI_HUMAN   | Radixin                                                                                                                  | RDX      | □ | 0 (0) | 0 (0) | 0 (0) | 0 (0) | 3 (3) | 1 (1) | 2 (1) | 1 (1) | 1 (1) | 1 (1) |
| CA021_HUMAN  | CA021_HUMAN  | Uncharacterized protein C1orf21                                                                                          | C1orf21  | □ | 1 (1) | 1 (1) | 1 (1) | 3 (2) | 0 (0) | 1 (1) | 0 (0) | 2 (2) | 0 (0) | 0 (0) |
| CBLB_HUMAN   | CBLB_HUMAN   | E3 ubiquitin-protein ligase CBL-B                                                                                        | CBLB     | □ | 1 (1) | 0 (0) | 0 (0) | 0 (0) | 3 (2) | 2 (1) | 0 (0) | 1 (1) | 0 (0) | 2 (2) |
| RNF12_HUMAN  | RNF12_HUMAN  | E3 ubiquitin-protein ligase RLIM                                                                                         | RLIM     | □ | 0 (0) | 0 (0) | 0 (0) | 0 (0) | 2 (2) | 1 (1) | 1 (1) | 1 (1) | 3 (2) | 0 (0) |
| SYFA_HUMAN   | SYFA_HUMAN   | Phenylalanyl-tRNA synthetase alpha chain                                                                                 | FARSA    | □ | 0 (0) | 0 (0) | 0 (0) | 2 (1) | 0 (0) | 0 (0) | 0 (0) | 2 (1) | 4 (1) | 0 (0) |
| TIF1B_HUMAN  | TIF1B_HUMAN  | Transcription intermediary factor 1-beta                                                                                 | TRIM28   | □ | 0 (0) | 0 (0) | 0 (0) | 0 (0) | 0 (0) | 0 (0) | 1 (1) | 3 (1) | 4 (3) | 0 (0) |
| SPD2B_HUMAN  | SPD2B_HUMAN  | SH3 and PX domain-containing protein 2B                                                                                  | SH3PXD2B | □ | 0 (0) | 0 (0) | 0 (0) | 2 (1) | 0 (0) | 2 (1) | 1 (1) | 1 (1) | 2 (2) | 0 (0) |
| A8K5L5_HUMAN | A8K5L5_HUMAN | cDNA FLJ75689, highly similar to Homo sapiens poliovirus receptor-related 2 (herpesvirus entry mediator B) (PVRL2), mRNA | NULL     | □ | 0 (0) | 1 (1) | 2 (2) | 3 (2) | 0 (0) | 0 (0) | 0 (0) | 1 (1) | 1 (1) | 0 (0) |
| NBN_HUMAN    | NBN_HUMAN    | Nibrin                                                                                                                   | NBN      | □ | 0 (0) | 0 (0) | 0 (0) | 0 (0) | 2 (1) | 0 (0) | 1 (1) | 1 (1) | 2 (1) | 2 (1) |

|             |             |                                                                                 |          |                          |       |       |       |       |       |       |       |       |       |       |
|-------------|-------------|---------------------------------------------------------------------------------|----------|--------------------------|-------|-------|-------|-------|-------|-------|-------|-------|-------|-------|
| RABE1_HUMAN | RABE1_HUMAN | Rab GTPase-binding effector protein 1                                           | RABEP1   | <input type="checkbox"/> | 0 (0) | 0 (0) | 0 (0) | 1 (1) | 0 (0) | 0 (0) | 0 (0) | 2 (1) | 3 (3) | 0 (0) |
| DUS3_HUMAN  | DUS3_HUMAN  | Dual specificity protein phosphatase 3                                          | DUSP3    | <input type="checkbox"/> | 0 (0) | 0 (0) | 0 (0) | 0 (0) | 2 (1) | 2 (1) | 2 (1) | 1 (1) | 0 (0) | 1 (1) |
| KIFC1_HUMAN | KIFC1_HUMAN | Kinesin-like protein KIFC1                                                      | KIFC1    | <input type="checkbox"/> | 0 (0) | 2 (1) | 0 (0) | 0 (0) | 1 (1) | 2 (1) | 1 (1) | 0 (0) | 2 (1) | 0 (0) |
| CALD1_HUMAN | CALD1_HUMAN | Caldesmon                                                                       | CALD1    | <input type="checkbox"/> | 0 (0) | 0 (0) | 0 (0) | 0 (0) | 0 (0) | 0 (0) | 0 (0) | 4 (1) | 4 (1) | 0 (0) |
| UBA1_HUMAN  | UBA1_HUMAN  | Ubiquitin-like modifier-activating enzyme 1                                     | UBA1     | <input type="checkbox"/> | 0 (0) | 0 (0) | 0 (0) | 0 (0) | 2 (1) | 1 (1) | 2 (1) | 1 (1) | 1 (1) | 1 (1) |
| MK04_HUMAN  | MK04_HUMAN  | Mitogen-activated protein kinase 4                                              | MAPK4    | <input type="checkbox"/> | 0 (0) | 0 (0) | 0 (0) | 0 (0) | 2 (2) | 2 (1) | 2 (1) | 1 (1) | 0 (0) | 1 (1) |
| PGM1_HUMAN  | PGM1_HUMAN  | Phosphoglucomutase-1                                                            | PGM1     | <input type="checkbox"/> | 0 (0) | 0 (0) | 0 (0) | 0 (0) | 2 (1) | 2 (1) | 1 (1) | 2 (1) | 1 (1) | 0 (0) |
| ATX2L_HUMAN | ATX2L_HUMAN | Ataxin-2-like protein                                                           | ATXN2L   | <input type="checkbox"/> | 0 (0) | 0 (0) | 0 (0) | 0 (0) | 1 (1) | 2 (1) | 2 (2) | 2 (1) | 1 (1) | 0 (0) |
| 2A5A_HUMAN  | 2A5A_HUMAN  | Serine/threonine-protein phosphatase 2A 56 kDa regulatory subunit alpha isoform | PPP2R5A  | <input type="checkbox"/> | 3 (2) | 2 (1) | 2 (1) | 0 (0) | 0 (0) | 1 (1) | 0 (0) | 0 (0) | 0 (0) | 0 (0) |
| KIRR1_HUMAN | KIRR1_HUMAN | Kin of IRRE-like protein 1                                                      | KIRREL   | <input type="checkbox"/> | 0 (0) | 1 (1) | 1 (1) | 0 (0) | 1 (1) | 0 (0) | 1 (1) | 2 (2) | 1 (1) | 1 (1) |
| TSR1_HUMAN  | TSR1_HUMAN  | Pre-rRNA-processing protein TSR1 homolog                                        | TSR1     | <input type="checkbox"/> | 0 (0) | 0 (0) | 1 (1) | 0 (0) | 2 (1) | 1 (1) | 0 (0) | 1 (1) | 1 (1) | 2 (1) |
| EXOC2_HUMAN | EXOC2_HUMAN | Exocyst complex component 2                                                     | EXOC2    | <input type="checkbox"/> | 0 (0) | 0 (0) | 0 (0) | 0 (0) | 0 (0) | 3 (2) | 2 (1) | 2 (2) | 1 (1) | 0 (0) |
| STK10_HUMAN | STK10_HUMAN | Serine/threonine-protein kinase 10                                              | STK10    | <input type="checkbox"/> | 0 (0) | 0 (0) | 1 (1) | 2 (1) | 0 (0) | 3 (2) | 1 (1) | 1 (1) | 0 (0) | 0 (0) |
| HAP28_HUMAN | HAP28_HUMAN | 28 kDa heat- and acid-stable phosphoprotein                                     | PDAP1    | <input type="checkbox"/> | 0 (0) | 0 (0) | 1 (1) | 2 (1) | 1 (1) | 2 (1) | 0 (0) | 0 (0) | 1 (1) | 1 (1) |
| GRM1A_HUMAN | GRM1A_HUMAN | GRAM domain-containing protein 1A                                               | GRAMD1A  | <input type="checkbox"/> | 0 (0) | 1 (1) | 0 (0) | 0 (0) | 2 (2) | 2 (1) | 2 (1) | 1 (1) | 0 (0) | 0 (0) |
| TOE1_HUMAN  | TOE1_HUMAN  | Target of EGR1 protein 1                                                        | TOE1     | <input type="checkbox"/> | 0 (0) | 1 (1) | 0 (0) | 2 (1) | 0 (0) | 0 (0) | 0 (0) | 2 (1) | 3 (2) | 0 (0) |
| NCOA4_HUMAN | NCOA4_HUMAN | Nuclear receptor coactivator 4                                                  | NCOA4    | <input type="checkbox"/> | 0 (0) | 0 (0) | 0 (0) | 0 (0) | 0 (0) | 0 (0) | 1 (1) | 5 (2) | 2 (1) | 0 (0) |
| NKAP_HUMAN  | NKAP_HUMAN  | NF-kappa-B-activating protein                                                   | NKAP     | <input type="checkbox"/> | 0 (0) | 0 (0) | 0 (0) | 2 (1) | 0 (0) | 0 (0) | 0 (0) | 2 (1) | 4 (2) | 0 (0) |
| ALS2_HUMAN  | ALS2_HUMAN  | Alsin                                                                           | ALS2     | <input type="checkbox"/> | 0 (0) | 0 (0) | 1 (1) | 0 (0) | 1 (1) | 2 (1) | 3 (2) | 0 (0) | 1 (1) | 0 (0) |
| CH055_HUMAN | CH055_HUMAN | UPF0670 protein C8orf55                                                         | C8orf55  | <input type="checkbox"/> | 0 (0) | 0 (0) | 0 (0) | 2 (1) | 0 (0) | 1 (1) | 0 (0) | 3 (1) | 1 (1) | 1 (1) |
| RED_HUMAN   | RED_HUMAN   | Protein Red                                                                     | IK       | <input type="checkbox"/> | 0 (0) | 0 (0) | 0 (0) | 0 (0) | 0 (0) | 0 (0) | 2 (1) | 3 (1) | 3 (1) | 0 (0) |
| YBOX1_HUMAN | YBOX1_HUMAN | Nuclease-sensitive element-binding protein 1                                    | YBX1     | <input type="checkbox"/> | 0 (0) | 0 (0) | 0 (0) | 0 (0) | 2 (1) | 1 (1) | 0 (0) | 1 (1) | 2 (1) | 2 (2) |
| SSFA2_HUMAN | SSFA2_HUMAN | Sperm-specific antigen 2                                                        | SSFA2    | <input type="checkbox"/> | 0 (0) | 0 (0) | 0 (0) | 2 (2) | 0 (0) | 0 (0) | 0 (0) | 2 (1) | 4 (3) | 0 (0) |
| BUB3_HUMAN  | BUB3_HUMAN  | Mitotic checkpoint protein BUB3                                                 | BUB3     | <input type="checkbox"/> | 0 (0) | 0 (0) | 0 (0) | 0 (0) | 3 (2) | 1 (1) | 1 (1) | 2 (2) | 1 (1) | 0 (0) |
| ENSA_HUMAN  | ENSA_HUMAN  | Alpha-endosulfine                                                               | ENSA     | <input type="checkbox"/> | 0 (0) | 0 (0) | 0 (0) | 0 (0) | 0 (0) | 0 (0) | 0 (0) | 2 (2) | 5 (2) | 0 (0) |
| CGBP1_HUMAN | CGBP1_HUMAN | CGG triplet repeat-binding protein 1                                            | CGGBP1   | <input type="checkbox"/> | 0 (0) | 0 (0) | 0 (0) | 0 (0) | 0 (0) | 0 (0) | 0 (0) | 2 (2) | 6 (2) | 0 (0) |
| C19L1_HUMAN | C19L1_HUMAN | CWF19-like protein 1                                                            | CWF19L1  | <input type="checkbox"/> | 0 (0) | 0 (0) | 0 (0) | 0 (0) | 2 (1) | 2 (2) | 1 (1) | 2 (1) | 0 (0) | 1 (1) |
| AIBP_HUMAN  | AIBP_HUMAN  | Apolipoprotein A-I-binding protein                                              | APOA1BP  | <input type="checkbox"/> | 0 (0) | 0 (0) | 0 (0) | 0 (0) | 2 (1) | 2 (1) | 2 (1) | 0 (0) | 0 (0) | 2 (1) |
| CDKAL_HUMAN | CDKAL_HUMAN | CDK5 regulatory subunit-associated protein 1-like 1                             | CDKAL1   | <input type="checkbox"/> | 0 (0) | 0 (0) | 0 (0) | 0 (0) | 2 (1) | 1 (1) | 2 (1) | 1 (1) | 1 (1) | 1 (1) |
| IF4G1_HUMAN | IF4G1_HUMAN | Eukaryotic translation initiation factor 4 gamma 1                              | EIF4G1   | <input type="checkbox"/> | 2 (1) | 1 (1) | 3 (1) | 0 (0) | 1 (1) | 0 (0) | 0 (0) | 1 (1) | 0 (0) | 0 (0) |
| CPSF7_HUMAN | CPSF7_HUMAN | Cleavage and polyadenylation specificity factor subunit 7                       | CPSF7    | <input type="checkbox"/> | 0 (0) | 0 (0) | 0 (0) | 0 (0) | 2 (1) | 1 (1) | 1 (1) | 2 (1) | 2 (1) | 0 (0) |
| ARC1B_HUMAN | ARC1B_HUMAN | Actin-related protein 2/3 complex subunit 1B                                    | ARPC1B   | <input type="checkbox"/> | 0 (0) | 0 (0) | 0 (0) | 0 (0) | 4 (2) | 0 (0) | 1 (1) | 2 (1) | 0 (0) | 1 (1) |
| KAT6A_HUMAN | KAT6A_HUMAN | --                                                                              | --       | <input type="checkbox"/> | 0 (0) | 0 (0) | 0 (0) | 0 (0) | 0 (0) | 1 (1) | 0 (0) | 0 (0) | 6 (2) | 0 (0) |
| ATE1_HUMAN  | ATE1_HUMAN  | Arginyl-tRNA--protein transferase 1                                             | ATE1     | <input type="checkbox"/> | 0 (0) | 0 (0) | 0 (0) | 1 (1) | 0 (0) | 0 (0) | 0 (0) | 2 (1) | 4 (1) | 0 (0) |
| PCM1_HUMAN  | PCM1_HUMAN  | Pericentriolar material 1 protein                                               | PCM1     | <input type="checkbox"/> | 0 (0) | 0 (0) | 0 (0) | 0 (0) | 0 (0) | 1 (1) | 1 (1) | 1 (1) | 4 (2) | 0 (0) |
| SRRM2_HUMAN | SRRM2_HUMAN | Serine/arginine repetitive matrix protein 2                                     | SRRM2    | <input type="checkbox"/> | 0 (0) | 0 (0) | 0 (0) | 0 (0) | 1 (1) | 1 (1) | 1 (1) | 2 (2) | 2 (2) | 0 (0) |
| CK048_HUMAN | CK048_HUMAN | Uncharacterized protein C11orf48                                                | C11orf48 | <input type="checkbox"/> | 0 (0) | 0 (0) | 0 (0) | 0 (0) | 0 (0) | 0 (0) | 2 (2) | 2 (1) | 3 (2) | 0 (0) |
| DBPA_HUMAN  | DBPA_HUMAN  | DNA-binding protein A                                                           | CSDA     | <input type="checkbox"/> | 0 (0) | 0 (0) | 0 (0) | 0 (0) | 0 (0) | 0 (0) | 0 (0) | 2 (1) | 5 (2) | 0 (0) |
| KI20A_HUMAN | KI20A_HUMAN | Kinesin-like protein KIF20A                                                     | KIF20A   | <input type="checkbox"/> | 0 (0) | 0 (0) | 0 (0) | 0 (0) | 0 (0) | 0 (0) | 1 (1) | 2 (2) | 4 (4) | 0 (0) |
| SPF30_HUMAN | SPF30_HUMAN | Survival of motor neuron-related-splicing factor 30                             | SMNDC1   | <input type="checkbox"/> | 0 (0) | 0 (0) | 0 (0) | 0 (0) | 2 (2) | 1 (1) | 0 (0) | 2 (2) | 2 (2) | 0 (0) |
| CTR2_HUMAN  | CTR2_HUMAN  | Low affinity cationic amino acid transporter 2                                  | SLC7A2   | <input type="checkbox"/> | 0 (0) | 3 (2) | 0 (0) | 0 (0) | 0 (0) | 1 (1) | 0 (0) | 2 (1) | 1 (1) | 0 (0) |
| TIF1A_HUMAN | TIF1A_HUMAN | Transcription intermediary factor 1-alpha                                       | TRIM24   | <input type="checkbox"/> | 1 (1) | 0 (0) | 0 (0) | 0 (0) | 1 (1) | 1 (1) | 2 (1) | 1 (1) | 1 (1) | 0 (0) |
| TTF2_HUMAN  | TTF2_HUMAN  | Transcription termination factor 2                                              | TTF2     | <input type="checkbox"/> | 0 (0) | 0 (0) | 0 (0) | 0 (0) | 0 (0) | 1 (1) | 2 (1) | 2 (2) | 2 (2) | 0 (0) |
| TCPD_HUMAN  | TCPD_HUMAN  | T-complex protein 1 subunit delta                                               | CCT4     | <input type="checkbox"/> | 0 (0) | 0 (0) | 0 (0) | 0 (0) | 2 (1) | 2 (1) | 0 (0) | 1 (1) | 1 (1) | 1 (1) |

|              |              |                                                            |          |                          |       |       |       |       |       |       |       |       |       |       |
|--------------|--------------|------------------------------------------------------------|----------|--------------------------|-------|-------|-------|-------|-------|-------|-------|-------|-------|-------|
| TBRG4_HUMAN  | TBRG4_HUMAN  | Protein TBRG4                                              | TBRG4    | <input type="checkbox"/> | 0 (0) | 0 (0) | 0 (0) | 0 (0) | 2 (1) | 1 (1) | 1 (1) | 1 (1) | 1 (1) | 1 (1) |
| SDA1_HUMAN   | SDA1_HUMAN   | Protein SDA1 homolog                                       | SDAD1    | <input type="checkbox"/> | 0 (0) | 0 (0) | 0 (0) | 1 (1) | 0 (0) | 0 (0) | 2 (1) | 2 (1) | 2 (1) | 0 (0) |
| TACC3_HUMAN  | TACC3_HUMAN  | Transforming acidic coiled-coil-containing protein 3       | TACC3    | <input type="checkbox"/> | 2 (1) | 0 (0) | 1 (1) | 2 (1) | 0 (0) | 1 (1) | 0 (0) | 0 (0) | 0 (0) | 0 (0) |
| SAAL1_HUMAN  | SAAL1_HUMAN  | Protein SAAL1                                              | SAAL1    | <input type="checkbox"/> | 0 (0) | 0 (0) | 0 (0) | 0 (0) | 2 (1) | 1 (1) | 1 (1) | 2 (1) | 1 (1) | 0 (0) |
| ZSC21_HUMAN  | ZSC21_HUMAN  | Zinc finger and SCAN domain-containing protein 21          | ZSCAN21  | <input type="checkbox"/> | 0 (0) | 0 (0) | 0 (0) | 0 (0) | 0 (0) | 0 (0) | 0 (0) | 2 (1) | 3 (2) | 0 (0) |
| GDAP1_HUMAN  | GDAP1_HUMAN  | Ganglioside-induced differentiation-associated protein 1   | GDAP1    | <input type="checkbox"/> | 0 (0) | 0 (0) | 0 (0) | 1 (1) | 0 (0) | 0 (0) | 0 (0) | 2 (2) | 4 (2) | 0 (0) |
| ENASE_HUMAN  | ENASE_HUMAN  | Cytosolic endo-beta-N-acetylglucosaminidase                | ENGASE   | <input type="checkbox"/> | 0 (0) | 0 (0) | 0 (0) | 0 (0) | 0 (0) | 1 (1) | 1 (1) | 3 (2) | 2 (1) | 0 (0) |
| K1109_HUMAN  | K1109_HUMAN  | Uncharacterized protein KIAA1109                           | KIAA1109 | <input type="checkbox"/> | 0 (0) | 0 (0) | 0 (0) | 0 (0) | 2 (1) | 2 (2) | 1 (1) | 1 (1) | 0 (0) | 1 (1) |
| MSH6_HUMAN   | MSH6_HUMAN   | DNA mismatch repair protein Msh6                           | MSH6     | <input type="checkbox"/> | 0 (0) | 0 (0) | 0 (0) | 3 (3) | 0 (0) | 0 (0) | 0 (0) | 1 (1) | 3 (2) | 0 (0) |
| KDM2A_HUMAN  | KDM2A_HUMAN  | Lysine-specific demethylase 2A                             | KDM2A    | <input type="checkbox"/> | 0 (0) | 0 (0) | 0 (0) | 1 (1) | 0 (0) | 0 (0) | 0 (0) | 3 (1) | 3 (2) | 0 (0) |
| CO3_HUMAN    | CO3_HUMAN    | Complement C3                                              | C3       | <input type="checkbox"/> | 0 (0) | 0 (0) | 0 (0) | 0 (0) | 2 (1) | 2 (1) | 2 (1) | 1 (1) | 0 (0) | 0 (0) |
| F5GZS6_HUMAN | F5GZS6_HUMAN | --                                                         | --       | <input type="checkbox"/> | 0 (0) | 0 (0) | 1 (1) | 0 (0) | 0 (0) | 1 (1) | 1 (1) | 2 (2) | 2 (2) | 0 (0) |
| IMA2_HUMAN   | IMA2_HUMAN   | Importin subunit alpha-2                                   | KPNA2    | <input type="checkbox"/> | 0 (0) | 0 (0) | 0 (0) | 0 (0) | 1 (1) | 2 (1) | 1 (1) | 1 (1) | 0 (0) | 2 (1) |
| F5GWH4_HUMAN | F5GWH4_HUMAN | --                                                         | --       | <input type="checkbox"/> | 0 (0) | 0 (0) | 0 (0) | 0 (0) | 0 (0) | 0 (0) | 2 (1) | 2 (1) | 3 (2) | 0 (0) |
| CUX1_HUMAN   | CUX1_HUMAN   | Homeobox protein cut-like 1                                | CUX1     | <input type="checkbox"/> | 0 (0) | 0 (0) | 0 (0) | 1 (1) | 0 (0) | 0 (0) | 0 (0) | 3 (2) | 3 (2) | 0 (0) |
| CS029_HUMAN  | CS029_HUMAN  | Uncharacterized protein C19orf29                           | C19orf29 | <input type="checkbox"/> | 0 (0) | 0 (0) | 0 (0) | 1 (1) | 0 (0) | 0 (0) | 0 (0) | 2 (1) | 4 (1) | 0 (0) |
| HYLS1_HUMAN  | HYLS1_HUMAN  | Hydrolethalus syndrome protein 1                           | HYLS1    | <input type="checkbox"/> | 0 (0) | 0 (0) | 0 (0) | 0 (0) | 0 (0) | 1 (1) | 2 (1) | 2 (1) | 2 (1) | 0 (0) |
| T2FB_HUMAN   | T2FB_HUMAN   | General transcription factor IIF subunit 2                 | GTF2F2   | <input type="checkbox"/> | 0 (0) | 0 (0) | 0 (0) | 0 (0) | 1 (1) | 1 (1) | 2 (1) | 1 (1) | 1 (1) | 1 (1) |
| KS6A5_HUMAN  | KS6A5_HUMAN  | Ribosomal protein S6 kinase alpha-5                        | RPS6KA5  | <input type="checkbox"/> | 0 (0) | 0 (0) | 0 (0) | 0 (0) | 1 (1) | 2 (1) | 0 (0) | 2 (1) | 2 (1) | 0 (0) |
| LBR_HUMAN    | LBR_HUMAN    | Lamin-B receptor                                           | LBR      | <input type="checkbox"/> | 0 (0) | 0 (0) | 0 (0) | 0 (0) | 0 (0) | 0 (0) | 0 (0) | 2 (1) | 3 (2) | 0 (0) |
| NEB1_HUMAN   | NEB1_HUMAN   | Neurabin-1                                                 | PPP1R9A  | <input type="checkbox"/> | 0 (0) | 0 (0) | 0 (0) | 3 (2) | 0 (0) | 0 (0) | 0 (0) | 2 (1) | 2 (1) | 0 (0) |
| 1433Z_HUMAN  | 1433Z_HUMAN  | 14-3-3 protein zeta/delta                                  | YWHAZ    | <input type="checkbox"/> | 0 (0) | 1 (1) | 0 (0) | 0 (0) | 2 (1) | 2 (1) | 2 (1) | 0 (0) | 0 (0) | 0 (0) |
| TCF20_HUMAN  | TCF20_HUMAN  | Transcription factor 20                                    | TCF20    | <input type="checkbox"/> | 0 (0) | 0 (0) | 3 (1) | 2 (1) | 1 (1) | 0 (0) | 0 (0) | 0 (0) | 0 (0) | 0 (0) |
| ADT3_HUMAN   | ADT3_HUMAN   | ADP/ATP translocase 3                                      | SLC25A6  | <input type="checkbox"/> | 0 (0) | 0 (0) | 0 (0) | 0 (0) | 1 (1) | 2 (1) | 1 (1) | 2 (1) | 0 (0) | 0 (0) |
| DUS12_HUMAN  | DUS12_HUMAN  | Dual specificity protein phosphatase 12                    | DUSP12   | <input type="checkbox"/> | 0 (0) | 1 (1) | 1 (1) | 2 (1) | 0 (0) | 0 (0) | 0 (0) | 0 (0) | 2 (1) | 0 (0) |
| PHB_HUMAN    | PHB_HUMAN    | Prohibitin                                                 | PHB      | <input type="checkbox"/> | 0 (0) | 0 (0) | 0 (0) | 0 (0) | 1 (1) | 2 (1) | 2 (1) | 1 (1) | 0 (0) | 0 (0) |
| URFB1_HUMAN  | URFB1_HUMAN  | UHRF1-binding protein 1                                    | UHRF1BP1 | <input type="checkbox"/> | 0 (0) | 1 (1) | 0 (0) | 1 (1) | 1 (1) | 0 (0) | 0 (0) | 0 (0) | 0 (0) | 3 (1) |
| K0947_HUMAN  | K0947_HUMAN  | Uncharacterized protein KIAA0947                           | KIAA0947 | <input type="checkbox"/> | 2 (2) | 2 (1) | 0 (0) | 2 (1) | 0 (0) | 0 (0) | 0 (0) | 0 (0) | 0 (0) | 0 (0) |
| CE164_HUMAN  | CE164_HUMAN  | Centrosomal protein of 164 kDa                             | CEP164   | <input type="checkbox"/> | 0 (0) | 0 (0) | 0 (0) | 0 (0) | 1 (1) | 3 (2) | 2 (2) | 0 (0) | 0 (0) | 0 (0) |
| DYST_HUMAN   | DYST_HUMAN   | --                                                         | --       | <input type="checkbox"/> | 0 (0) | 0 (0) | 0 (0) | 0 (0) | 0 (0) | 0 (0) | 0 (0) | 2 (1) | 4 (3) | 0 (0) |
| CDYL1_HUMAN  | CDYL1_HUMAN  | Chromodomain Y-like protein                                | CDYL     | <input type="checkbox"/> | 0 (0) | 0 (0) | 0 (0) | 3 (2) | 0 (0) | 0 (0) | 0 (0) | 2 (1) | 1 (1) | 0 (0) |
| MK671_HUMAN  | MK671_HUMAN  | MK167 FHA domain-interacting nucleolar phosphoprotein      | MK167IP  | <input type="checkbox"/> | 0 (0) | 0 (0) | 0 (0) | 0 (0) | 1 (1) | 2 (1) | 0 (0) | 2 (1) | 1 (1) | 0 (0) |
| UBP20_HUMAN  | UBP20_HUMAN  | Ubiquitin carboxyl-terminal hydrolase 20                   | USP20    | <input type="checkbox"/> | 0 (0) | 0 (0) | 0 (0) | 0 (0) | 1 (1) | 2 (1) | 0 (0) | 1 (1) | 2 (1) | 0 (0) |
| FL2D_HUMAN   | FL2D_HUMAN   | Pre-mRNA-splicing regulator WTAP                           | WTAP     | <input type="checkbox"/> | 0 (0) | 0 (0) | 0 (0) | 1 (1) | 0 (0) | 0 (0) | 1 (1) | 2 (1) | 2 (1) | 0 (0) |
| MICA3_HUMAN  | MICA3_HUMAN  | Protein MICAL-3                                            | MICAL3   | <input type="checkbox"/> | 0 (0) | 0 (0) | 0 (0) | 0 (0) | 2 (1) | 1 (1) | 2 (1) | 1 (1) | 0 (0) | 0 (0) |
| LYRIC_HUMAN  | LYRIC_HUMAN  | Protein LYRIC                                              | MTDH     | <input type="checkbox"/> | 0 (0) | 0 (0) | 0 (0) | 4 (2) | 0 (0) | 0 (0) | 0 (0) | 0 (0) | 3 (2) | 0 (0) |
| LMNB1_HUMAN  | LMNB1_HUMAN  | Lamin-B1                                                   | LMNB1    | <input type="checkbox"/> | 0 (0) | 0 (0) | 1 (1) | 2 (1) | 0 (0) | 0 (0) | 0 (0) | 0 (0) | 1 (2) | 0 (0) |
| LS14A_HUMAN  | LS14A_HUMAN  | Protein LSM14 homolog A                                    | LSM14A   | <input type="checkbox"/> | 0 (0) | 0 (0) | 0 (0) | 1 (1) | 0 (0) | 1 (1) | 1 (1) | 1 (1) | 1 (1) | 1 (1) |
| DDX6_HUMAN   | DDX6_HUMAN   | Probable ATP-dependent RNA helicase DDX6                   | DDX6     | <input type="checkbox"/> | 0 (0) | 0 (0) | 0 (0) | 0 (0) | 2 (1) | 2 (2) | 0 (0) | 0 (0) | 2 (1) | 0 (0) |
| WDR70_HUMAN  | WDR70_HUMAN  | WD repeat-containing protein 70                            | WDR70    | <input type="checkbox"/> | 0 (0) | 0 (0) | 0 (0) | 0 (0) | 0 (0) | 0 (0) | 0 (0) | 3 (2) | 3 (2) | 0 (0) |
| SSRP1_HUMAN  | SSRP1_HUMAN  | FACT complex subunit SSRP1                                 | SSRP1    | <input type="checkbox"/> | 0 (0) | 0 (0) | 0 (0) | 1 (1) | 1 (1) | 2 (1) | 2 (1) | 0 (0) | 0 (0) | 0 (0) |
| RS3A_HUMAN   | RS3A_HUMAN   | 40S ribosomal protein S3a                                  | RPS3A    | <input type="checkbox"/> | 0 (0) | 0 (0) | 0 (0) | 0 (0) | 2 (1) | 2 (1) | 0 (0) | 1 (1) | 0 (0) | 1 (1) |
| SYSC_HUMAN   | SYSC_HUMAN   | Seryl-tRNA synthetase, cytoplasmic                         | SARS     | <input type="checkbox"/> | 0 (0) | 0 (0) | 0 (0) | 0 (0) | 1 (1) | 2 (1) | 1 (1) | 1 (1) | 1 (1) | 0 (0) |
| TDIF2_HUMAN  | TDIF2_HUMAN  | Deoxynucleotidyltransferase terminal-interacting protein 2 | DNTTIP2  | <input type="checkbox"/> | 0 (0) | 0 (0) | 0 (0) | 1 (1) | 0 (0) | 1 (1) | 0 (0) | 2 (1) | 2 (1) | 0 (0) |
| PRP4B_HUMAN  | PRP4B_HUMAN  | Serine/threonine-protein kinase PRP4 homolog               | PRPF4B   | <input type="checkbox"/> | 0 (0) | 0 (0) | 0 (0) | 0 (0) | 0 (0) | 0 (0) | 0 (0) | 1 (1) | 4 (3) | 1 (1) |

|              |              |                                                                                                  |          |                          |       |       |       |       |       |       |       |       |       |       |
|--------------|--------------|--------------------------------------------------------------------------------------------------|----------|--------------------------|-------|-------|-------|-------|-------|-------|-------|-------|-------|-------|
| TRMB_HUMAN   | TRMB_HUMAN   | tRNA (guanine-N(7)-methyltransferase                                                             | METTL1   | <input type="checkbox"/> | 0 (0) | 0 (0) | 0 (0) | 1 (1) | 0 (0) | 0 (0) | 0 (0) | 4 (2) | 1 (1) | 0 (0) |
| ZC3HE_HUMAN  | ZC3HE_HUMAN  | Zinc finger CCCH domain-containing protein 14                                                    | ZC3H14   | <input type="checkbox"/> | 0 (0) | 0 (0) | 0 (0) | 0 (0) | 0 (0) | 1 (1) | 1 (1) | 1 (1) | 2 (1) | 0 (0) |
| MED13_HUMAN  | MED13_HUMAN  | Mediator of RNA polymerase II transcription subunit 13                                           | MED13    | <input type="checkbox"/> | 0 (0) | 0 (0) | 0 (0) | 0 (0) | 1 (1) | 1 (1) | 0 (0) | 2 (2) | 0 (0) | 1 (1) |
| DHX15_HUMAN  | DHX15_HUMAN  | Putative pre-mRNA-splicing factor ATP-dependent RNA helicase DHX15                               | DHX15    | <input type="checkbox"/> | 1 (1) | 2 (1) | 2 (1) | 0 (0) | 0 (0) | 0 (0) | 0 (0) | 0 (0) | 0 (0) | 0 (0) |
| YKT6_HUMAN   | YKT6_HUMAN   | Synaptobrevin homolog YKT6                                                                       | YKT6     | <input type="checkbox"/> | 0 (0) | 0 (0) | 1 (1) | 4 (2) | 0 (0) | 0 (0) | 0 (0) | 0 (0) | 0 (0) | 0 (0) |
| SYNEM_HUMAN  | SYNEM_HUMAN  | Synemin                                                                                          | SYNM     | <input type="checkbox"/> | 0 (0) | 0 (0) | 0 (0) | 0 (0) | 0 (0) | 0 (0) | 0 (0) | 1 (1) | 4 (4) | 0 (0) |
| 1A01_HUMAN   | 1A01_HUMAN   | HLA class I histocompatibility antigen, A-1 alpha chain                                          | HLA-A    | <input type="checkbox"/> | 0 (0) | 0 (0) | 0 (0) | 0 (0) | 3 (3) | 0 (0) | 1 (1) | 0 (0) | 0 (0) | 1 (1) |
| BICD2_HUMAN  | BICD2_HUMAN  | Protein bicaudal D homolog 2                                                                     | BICD2    | <input type="checkbox"/> | 1 (1) | 1 (1) | 0 (0) | 1 (1) | 0 (0) | 1 (1) | 0 (0) | 0 (0) | 1 (1) | 0 (0) |
| AMPD2_HUMAN  | AMPD2_HUMAN  | AMP deaminase 2                                                                                  | AMPD2    | <input type="checkbox"/> | 0 (0) | 0 (0) | 0 (0) | 0 (0) | 0 (0) | 2 (2) | 0 (0) | 1 (1) | 0 (0) | 2 (1) |
| ZN623_HUMAN  | ZN623_HUMAN  | Zinc finger protein 623                                                                          | ZNF623   | <input type="checkbox"/> | 0 (0) | 0 (0) | 0 (0) | 0 (0) | 0 (0) | 1 (1) | 1 (1) | 1 (1) | 2 (1) | 0 (0) |
| ENPL_HUMAN   | ENPL_HUMAN   | Endoplasmic                                                                                      | HSP90B1  | <input type="checkbox"/> | 0 (0) | 0 (0) | 0 (0) | 0 (0) | 3 (1) | 0 (0) | 0 (0) | 0 (0) | 2 (1) | 0 (0) |
| CPSF5_HUMAN  | CPSF5_HUMAN  | Cleavage and polyadenylation specificity factor subunit 5                                        | NUDT21   | <input type="checkbox"/> | 0 (0) | 0 (0) | 0 (0) | 0 (0) | 0 (0) | 2 (1) | 2 (1) | 1 (1) | 0 (0) | 0 (0) |
| B2R9R2_HUMAN | B2R9R2_HUMAN | cDNA, FLJ94517, highly similar to Homo sapiens baculoviral IAP repeat-containing 4 (BIRC4), mRNA | NULL     | <input type="checkbox"/> | 0 (0) | 0 (0) | 0 (0) | 0 (0) | 0 (0) | 2 (2) | 2 (2) | 0 (0) | 1 (1) | 0 (0) |
| UBP48_HUMAN  | UBP48_HUMAN  | Ubiquitin carboxyl-terminal hydrolase 48                                                         | USP48    | <input type="checkbox"/> | 0 (0) | 0 (0) | 0 (0) | 0 (0) | 0 (0) | 0 (0) | 0 (0) | 0 (0) | 3 (4) | 0 (0) |
| TF3B_HUMAN   | TF3B_HUMAN   | Transcription factor IIB 90 kDa subunit                                                          | BRF1     | <input type="checkbox"/> | 0 (0) | 0 (0) | 0 (0) | 0 (0) | 0 (0) | 0 (0) | 0 (0) | 2 (1) | 1 (1) | 0 (0) |
| CTDP1_HUMAN  | CTDP1_HUMAN  | RNA polymerase II subunit A C-terminal domain phosphatase                                        | CTDP1    | <input type="checkbox"/> | 0 (0) | 0 (0) | 0 (0) | 0 (0) | 0 (0) | 0 (0) | 0 (0) | 0 (0) | 3 (3) | 0 (0) |
| SI1L1_HUMAN  | SI1L1_HUMAN  | Signal-induced proliferation-associated 1-like protein 1                                         | SIPA1L1  | <input type="checkbox"/> | 0 (0) | 0 (0) | 1 (1) | 1 (1) | 1 (1) | 1 (1) | 0 (0) | 0 (0) | 1 (1) | 0 (0) |
| ZC3HF_HUMAN  | ZC3HF_HUMAN  | Zinc finger CCCH domain-containing protein 15                                                    | ZC3H15   | <input type="checkbox"/> | 0 (0) | 0 (0) | 0 (0) | 0 (0) | 0 (0) | 0 (0) | 0 (0) | 2 (2) | 1 (1) | 0 (0) |
| UBP36_HUMAN  | UBP36_HUMAN  | Ubiquitin carboxyl-terminal hydrolase 36                                                         | USP36    | <input type="checkbox"/> | 0 (0) | 0 (0) | 0 (0) | 0 (0) | 0 (0) | 0 (0) | 1 (1) | 2 (1) | 2 (1) | 0 (0) |
| MAF1_HUMAN   | MAF1_HUMAN   | Repressor of RNA polymerase III transcription MAF1 homolog                                       | MAF1     | <input type="checkbox"/> | 0 (0) | 0 (0) | 0 (0) | 0 (0) | 0 (0) | 0 (0) | 0 (0) | 2 (1) | 1 (1) | 0 (0) |
| NOB1_HUMAN   | NOB1_HUMAN   | RNA-binding protein NOB1                                                                         | NOB1     | <input type="checkbox"/> | 0 (0) | 0 (0) | 1 (1) | 1 (1) | 0 (0) | 0 (0) | 0 (0) | 0 (0) | 1 (1) | 0 (0) |
| TFAM_HUMAN   | TFAM_HUMAN   | Transcription factor A, mitochondrial                                                            | TFAM     | <input type="checkbox"/> | 0 (0) | 0 (0) | 0 (0) | 1 (1) | 0 (0) | 0 (0) | 0 (0) | 0 (0) | 4 (1) | 0 (0) |
| PKHA5_HUMAN  | PKHA5_HUMAN  | Pleckstrin homology domain-containing family A member 5                                          | PLEKHA5  | <input type="checkbox"/> | 0 (0) | 1 (1) | 2 (1) | 1 (1) | 0 (0) | 0 (0) | 0 (0) | 0 (0) | 1 (1) | 0 (0) |
| NUP85_HUMAN  | NUP85_HUMAN  | Nuclear pore complex protein Nup85                                                               | NUP85    | <input type="checkbox"/> | 0 (0) | 0 (0) | 0 (0) | 0 (0) | 0 (0) | 1 (1) | 1 (1) | 1 (1) | 1 (1) | 1 (1) |
| KIF15_HUMAN  | KIF15_HUMAN  | Kinesin-like protein KIF15                                                                       | KIF15    | <input type="checkbox"/> | 0 (0) | 0 (0) | 0 (0) | 0 (0) | 0 (0) | 1 (1) | 2 (1) | 1 (1) | 0 (0) | 1 (1) |
| ZN281_HUMAN  | ZN281_HUMAN  | Zinc finger protein 281                                                                          | ZNF281   | <input type="checkbox"/> | 0 (0) | 0 (0) | 0 (0) | 0 (0) | 0 (0) | 0 (0) | 1 (1) | 2 (1) | 2 (1) | 0 (0) |
| CL041_HUMAN  | CL041_HUMAN  | Uncharacterized protein C12orf41                                                                 | C12orf41 | <input type="checkbox"/> | 0 (0) | 0 (0) | 0 (0) | 1 (1) | 0 (0) | 0 (0) | 0 (0) | 2 (1) | 2 (1) | 0 (0) |
| F208A_HUMAN  | F208A_HUMAN  | --                                                                                               | --       | <input type="checkbox"/> | 0 (0) | 0 (0) | 0 (0) | 0 (0) | 0 (0) | 0 (0) | 0 (0) | 3 (2) | 2 (2) | 0 (0) |
| NDE1_HUMAN   | NDE1_HUMAN   | Nuclear distribution protein nudE homolog 1                                                      | NDE1     | <input type="checkbox"/> | 0 (0) | 0 (0) | 0 (0) | 0 (0) | 0 (0) | 0 (0) | 0 (0) | 3 (2) | 2 (1) | 0 (0) |
| ASXL2_HUMAN  | ASXL2_HUMAN  | Putative Polycomb group protein ASXL2                                                            | ASXL2    | <input type="checkbox"/> | 0 (0) | 0 (0) | 0 (0) | 0 (0) | 0 (0) | 0 (0) | 0 (0) | 2 (1) | 1 (2) | 0 (0) |
| IQGA1_HUMAN  | IQGA1_HUMAN  | Ras GTPase-activating-like protein IQGAP1                                                        | IQGAP1   | <input type="checkbox"/> | 0 (0) | 0 (0) | 0 (0) | 0 (0) | 2 (1) | 0 (0) | 1 (1) | 0 (0) | 0 (0) | 2 (1) |
| KDM4A_HUMAN  | KDM4A_HUMAN  | Lysine-specific demethylase 4A                                                                   | KDM4A    | <input type="checkbox"/> | 0 (0) | 0 (0) | 0 (0) | 0 (0) | 2 (2) | 2 (2) | 1 (1) | 0 (0) | 0 (0) | 0 (0) |
| RPRD2_HUMAN  | RPRD2_HUMAN  | Regulation of nuclear pre-mRNA domain-containing protein 2                                       | RPRD2    | <input type="checkbox"/> | 0 (0) | 0 (0) | 0 (0) | 0 (0) | 0 (0) | 1 (1) | 2 (2) | 2 (1) | 0 (0) | 0 (0) |
| CHMP6_HUMAN  | CHMP6_HUMAN  | Charged multivesicular body protein 6                                                            | CHMP6    | <input type="checkbox"/> | 0 (0) | 0 (0) | 0 (0) | 0 (0) | 2 (1) | 1 (1) | 0 (0) | 0 (0) | 0 (0) | 2 (1) |
| RBP56_HUMAN  | RBP56_HUMAN  | TATA-binding protein-associated factor 2N                                                        | TAF15    | <input type="checkbox"/> | 0 (0) | 0 (0) | 0 (0) | 0 (0) | 0 (0) | 0 (0) | 1 (1) | 1 (1) | 1 (2) | 0 (0) |
| USP9X_HUMAN  | USP9X_HUMAN  | Probable ubiquitin carboxyl-terminal hydrolase FAF-X                                             | USP9X    | <input type="checkbox"/> | 0 (0) | 0 (0) | 0 (0) | 0 (0) | 2 (1) | 1 (1) | 0 (0) | 0 (0) | 0 (0) | 2 (1) |
| TCPA_HUMAN   | TCPA_HUMAN   | T-complex protein 1 subunit alpha                                                                | TCP1     | <input type="checkbox"/> | 0 (0) | 0 (0) | 0 (0) | 0 (0) | 0 (0) | 2 (1) | 0 (0) | 2 (2) | 0 (0) | 1 (1) |
| PHAR4_HUMAN  | PHAR4_HUMAN  | Phosphatase and actin regulator 4                                                                | PHACTR4  | <input type="checkbox"/> | 1 (1) | 2 (1) | 2 (1) | 0 (0) | 0 (0) | 0 (0) | 0 (0) | 0 (0) | 0 (0) | 0 (0) |
| REP11_HUMAN  | REP11_HUMAN  | Replication initiator 1                                                                          | REPIN1   | <input type="checkbox"/> | 0 (0) | 0 (0) | 0 (0) | 0 (0) | 0 (0) | 2 (2) | 2 (1) | 0 (0) | 1 (1) | 0 (0) |
| E9PAX8_HUMAN | E9PAX8_HUMAN | --                                                                                               | --       | <input type="checkbox"/> | 0 (0) | 0 (0) | 0 (0) | 1 (1) | 0 (0) | 0 (0) | 0 (0) | 1 (1) | 2 (2) | 0 (0) |





|               |               |                                                                           |         |   |       |       |       |       |       |       |       |       |       |       |       |
|---------------|---------------|---------------------------------------------------------------------------|---------|---|-------|-------|-------|-------|-------|-------|-------|-------|-------|-------|-------|
| TARBP1_HUMAN  | TARBP1_HUMAN  | TARBP1                                                                    |         |   |       |       |       |       |       |       |       |       |       |       |       |
| SYNE2_HUMAN   | SYNE2_HUMAN   | Nesprin-2                                                                 | SYNE2   | ☐ | 0 (0) | 0 (0) | 0 (0) | 0 (0) | 0 (0) | 0 (0) | 0 (0) | 0 (0) | 0 (0) | 4 (2) | 0 (0) |
| MARE1_HUMAN   | MARE1_HUMAN   | Microtubule-associated protein RP/EB family member 1                      | MAPRE1  | ☐ | 0 (0) | 0 (0) | 0 (0) | 0 (0) | 1 (1) | 1 (1) | 1 (1) | 0 (0) | 1 (1) | 1 (1) | 0 (0) |
| SCRN1_HUMAN   | SCRN1_HUMAN   | Secernin-1                                                                | SCRN1   | ☐ | 0 (0) | 0 (0) | 0 (0) | 0 (0) | 0 (0) | 0 (0) | 0 (0) | 2 (1) | 2 (1) | 2 (1) | 0 (0) |
| GOGA3_HUMAN   | GOGA3_HUMAN   | Golgin subfamily A member 3                                               | GOLGA3  | ☐ | 0 (0) | 0 (0) | 0 (0) | 0 (0) | 0 (0) | 0 (0) | 0 (0) | 0 (0) | 4 (2) | 4 (2) | 0 (0) |
| HEX11_HUMAN   | HEX11_HUMAN   | Protein HEXM1                                                             | HEXM1   | ☐ | 0 (0) | 0 (0) | 0 (0) | 0 (0) | 1 (1) | 0 (0) | 0 (0) | 1 (1) | 2 (1) | 2 (1) | 0 (0) |
| XPO5_HUMAN    | XPO5_HUMAN    | Exportin-5                                                                | XPO5    | ☐ | 0 (0) | 0 (0) | 0 (0) | 0 (0) | 0 (0) | 1 (1) | 0 (0) | 0 (0) | 2 (1) | 2 (1) | 0 (0) |
| TRIM33_HUMAN  | TRIM33_HUMAN  | E3 ubiquitin-protein ligase TRIM33                                        | TRIM33  | ☐ | 0 (0) | 0 (0) | 0 (0) | 0 (0) | 0 (0) | 0 (0) | 0 (0) | 2 (1) | 1 (1) | 1 (1) | 0 (0) |
| APOA1_HUMAN   | APOA1_HUMAN   | Apolipoprotein A-I                                                        | APOA1   | ☐ | 0 (0) | 0 (0) | 0 (0) | 0 (0) | 0 (0) | 0 (0) | 0 (0) | 1 (1) | 2 (1) | 2 (1) | 0 (0) |
| VRK1_HUMAN    | VRK1_HUMAN    | Serine/threonine-protein kinase VRK1                                      | VRK1    | ☐ | 0 (0) | 0 (0) | 0 (0) | 0 (0) | 0 (0) | 0 (0) | 0 (0) | 2 (1) | 1 (1) | 1 (1) | 0 (0) |
| SCFD1_HUMAN   | SCFD1_HUMAN   | Sec1 family domain-containing protein 1                                   | SCFD1   | ☐ | 0 (0) | 0 (0) | 0 (0) | 0 (0) | 0 (0) | 1 (1) | 0 (0) | 1 (1) | 1 (1) | 1 (1) | 0 (0) |
| PMS1_HUMAN    | PMS1_HUMAN    | PMS1 protein homolog 1                                                    | PMS1    | ☐ | 0 (0) | 0 (0) | 0 (0) | 0 (0) | 0 (0) | 1 (1) | 1 (1) | 1 (1) | 0 (0) | 0 (0) | 0 (0) |
| YLAT2_HUMAN   | YLAT2_HUMAN   | Y+L amino acid transporter 2                                              | SLC7A6  | ☐ | 0 (0) | 0 (0) | 0 (0) | 0 (0) | 0 (0) | 1 (1) | 1 (1) | 0 (0) | 1 (1) | 1 (1) | 0 (0) |
| WDR91_HUMAN   | WDR91_HUMAN   | WD repeat-containing protein 91                                           | WDR91   | ☐ | 0 (0) | 0 (0) | 2 (2) | 1 (1) | 0 (0) | 0 (0) | 0 (0) | 0 (0) | 0 (0) | 0 (0) | 0 (0) |
| NBR1_HUMAN    | NBR1_HUMAN    | Next to BRCA1 gene 1 protein                                              | NBR1    | ☐ | 0 (0) | 0 (0) | 0 (0) | 0 (0) | 0 (0) | 0 (0) | 0 (0) | 2 (1) | 1 (1) | 0 (0) | 0 (0) |
| DHYS_HUMAN    | DHYS_HUMAN    | Deoxyhypusine synthase                                                    | DHPS    | ☐ | 0 (0) | 0 (0) | 0 (0) | 0 (0) | 0 (0) | 0 (0) | 0 (0) | 1 (1) | 2 (1) | 0 (0) | 0 (0) |
| ANKY2_HUMAN   | ANKY2_HUMAN   | Ankyrin repeat and MYND domain-containing protein 2                       | ANKMY2  | ☐ | 0 (0) | 0 (0) | 0 (0) | 0 (0) | 0 (0) | 0 (0) | 0 (0) | 2 (1) | 1 (1) | 1 (1) | 0 (0) |
| TERA_HUMAN    | TERA_HUMAN    | Transitional endoplasmic reticulum ATPase                                 | VCP     | ☐ | 0 (0) | 1 (1) | 0 (0) | 1 (1) | 0 (0) | 0 (0) | 0 (0) | 0 (0) | 0 (0) | 0 (0) | 1 (1) |
| PER1_HUMAN    | PER1_HUMAN    | Period circadian protein homolog 1                                        | PER1    | ☐ | 0 (0) | 0 (0) | 0 (0) | 0 (0) | 1 (1) | 0 (0) | 2 (2) | 0 (0) | 0 (0) | 0 (0) | 0 (0) |
| MINT_HUMAN    | MINT_HUMAN    | Msx2-interacting protein                                                  | SPEN    | ☐ | 0 (0) | 0 (0) | 0 (0) | 1 (1) | 0 (0) | 0 (0) | 0 (0) | 0 (0) | 0 (0) | 0 (0) | 0 (0) |
| DREB_HUMAN    | DREB_HUMAN    | Drebrin                                                                   | DBN1    | ☐ | 0 (0) | 0 (0) | 0 (0) | 0 (0) | 0 (0) | 0 (0) | 0 (0) | 0 (0) | 0 (0) | 1 (2) | 0 (0) |
| PARN_HUMAN    | PARN_HUMAN    | Poly(A)-specific ribonuclease PARN                                        | PARN    | ☐ | 0 (0) | 0 (0) | 0 (0) | 0 (0) | 0 (0) | 1 (1) | 0 (0) | 1 (1) | 1 (1) | 1 (1) | 0 (0) |
| INT5_HUMAN    | INT5_HUMAN    | Integrator complex subunit 5                                              | INTS5   | ☐ | 0 (0) | 0 (0) | 0 (0) | 0 (0) | 0 (0) | 0 (0) | 0 (0) | 0 (0) | 1 (2) | 1 (2) | 0 (0) |
| OLA1_HUMAN    | OLA1_HUMAN    | Obg-like ATPase 1                                                         | OLA1    | ☐ | 0 (0) | 0 (0) | 0 (0) | 0 (0) | 1 (1) | 1 (1) | 1 (1) | 0 (0) | 0 (0) | 0 (0) | 0 (0) |
| DNJA1_HUMAN   | DNJA1_HUMAN   | DnaJ homolog subfamily A member 1                                         | DNJA1   | ☐ | 0 (0) | 0 (0) | 0 (0) | 0 (0) | 0 (0) | 0 (0) | 0 (0) | 0 (0) | 0 (0) | 1 (2) | 0 (0) |
| SF3A1_HUMAN   | SF3A1_HUMAN   | Splicing factor 3A subunit 1                                              | SF3A1   | ☐ | 0 (0) | 0 (0) | 0 (0) | 0 (0) | 1 (1) | 1 (1) | 0 (0) | 0 (0) | 0 (0) | 0 (0) | 1 (1) |
| RS28_HUMAN    | RS28_HUMAN    | 40S ribosomal protein S28                                                 | RPS28   | ☐ | 0 (0) | 0 (0) | 0 (0) | 0 (0) | 1 (1) | 0 (0) | 0 (0) | 0 (0) | 1 (1) | 1 (1) | 0 (0) |
| ##PRKDC_HUMAN | ##PRKDC_HUMAN | --                                                                        | --      | ☐ | 0 (0) | 0 (0) | 0 (0) | 0 (0) | 0 (0) | 0 (0) | 0 (0) | 0 (0) | 0 (0) | 1 (2) | 0 (0) |
| B2RDE1_HUMAN  | B2RDE1_HUMAN  | cDNA, FLJ96568, highly similar to Homo sapiens tropomyosin 3 (TPM3), mRNA | NULL    | ☐ | 0 (0) | 0 (0) | 0 (0) | 0 (0) | 0 (0) | 0 (0) | 0 (0) | 0 (0) | 0 (0) | 2 (1) | 0 (0) |
| AKAP2_HUMAN   | AKAP2_HUMAN   | A-kinase anchor protein 2                                                 | AKAP2   | ☐ | 0 (0) | 0 (0) | 0 (0) | 0 (0) | 1 (1) | 0 (0) | 0 (0) | 1 (1) | 0 (0) | 1 (1) | 0 (0) |
| NOG1_HUMAN    | NOG1_HUMAN    | Nucleolar GTP-binding protein 1                                           | GTPBP4  | ☐ | 0 (0) | 0 (0) | 0 (0) | 2 (1) | 0 (0) | 0 (0) | 0 (0) | 0 (0) | 0 (0) | 1 (1) | 0 (0) |
| POGZ_HUMAN    | POGZ_HUMAN    | Pogo transposable element with ZNF domain                                 | POGZ    | ☐ | 0 (0) | 0 (0) | 0 (0) | 1 (1) | 0 (0) | 0 (0) | 0 (0) | 2 (2) | 0 (0) | 0 (0) | 0 (0) |
| SAE1_HUMAN    | SAE1_HUMAN    | SUMO-activating enzyme subunit 1                                          | SAE1    | ☐ | 2 (1) | 0 (0) | 1 (1) | 0 (0) | 0 (0) | 0 (0) | 0 (0) | 0 (0) | 0 (0) | 0 (0) | 0 (0) |
| TCP4_HUMAN    | TCP4_HUMAN    | Activated RNA polymerase II transcriptional coactivator p15               | SUB1    | ☐ | 0 (0) | 0 (0) | 0 (0) | 1 (1) | 0 (0) | 0 (0) | 0 (0) | 0 (0) | 0 (0) | 2 (2) | 0 (0) |
| NU214_HUMAN   | NU214_HUMAN   | Nuclear pore complex protein Nup214                                       | NUP214  | ☐ | 1 (1) | 0 (0) | 2 (1) | 0 (0) | 0 (0) | 0 (0) | 0 (0) | 0 (0) | 0 (0) | 0 (0) | 0 (0) |
| ATF7_HUMAN    | ATF7_HUMAN    | Cyclic AMP-dependent transcription factor ATF-7                           | ATF7    | ☐ | 0 (0) | 0 (0) | 0 (0) | 1 (1) | 0 (0) | 0 (0) | 0 (0) | 0 (0) | 1 (1) | 1 (1) | 0 (0) |
| AQR_HUMAN     | AQR_HUMAN     | Intron-binding protein aquarius                                           | AQR     | ☐ | 0 (0) | 1 (1) | 0 (0) | 2 (2) | 0 (0) | 0 (0) | 0 (0) | 0 (0) | 0 (0) | 0 (0) | 0 (0) |
| P52K_HUMAN    | P52K_HUMAN    | 52 kDa repressor of the inhibitor of the protein kinase                   | PRKRIR  | ☐ | 0 (0) | 0 (0) | 0 (0) | 2 (1) | 0 (0) | 0 (0) | 0 (0) | 0 (0) | 0 (0) | 1 (1) | 0 (0) |
| PSF3_HUMAN    | PSF3_HUMAN    | DNA replication complex GINS protein PSF3                                 | GINS3   | ☐ | 0 (0) | 0 (0) | 0 (0) | 2 (1) | 0 (0) | 0 (0) | 0 (0) | 0 (0) | 0 (0) | 1 (1) | 0 (0) |
| ATAD2_HUMAN   | ATAD2_HUMAN   | ATPase family AAA domain-containing protein 2                             | ATAD2   | ☐ | 0 (0) | 1 (1) | 0 (0) | 2 (1) | 0 (0) | 0 (0) | 0 (0) | 0 (0) | 0 (0) | 0 (0) | 0 (0) |
| TBA1B_HUMAN   | TBA1B_HUMAN   | Tubulin alpha-1B chain                                                    | TUBA1B  | ☐ | 0 (0) | 0 (0) | 1 (1) | 2 (1) | 0 (0) | 0 (0) | 0 (0) | 0 (0) | 0 (0) | 0 (0) | 0 (0) |
| GBB2_HUMAN    | GBB2_HUMAN    | Guanine nucleotide-binding protein G(I)/G(S)/G(T) subunit beta-2          | GNB2    | ☐ | 0 (0) | 0 (0) | 0 (0) | 0 (0) | 0 (0) | 0 (0) | 0 (0) | 0 (0) | 0 (0) | 1 (3) | 0 (0) |
| EH1L1_HUMAN   | EH1L1_HUMAN   | EH domain-binding protein 1-like protein 1                                | EHBP1L1 | ☐ | 0 (0) | 0 (0) | 0 (0) | 0 (0) | 0 (0) | 0 (0) | 0 (0) | 1 (1) | 2 (1) | 2 (1) | 0 (0) |
| CASC3_HUMAN   | CASC3_HUMAN   | Protein CASC3                                                             | CASC3   | ☐ | 0 (0) | 0 (0) | 0 (0) | 0 (0) | 0 (0) | 1 (1) | 1 (1) | 0 (0) | 1 (1) | 1 (1) | 0 (0) |

|              |              |                                                                   |          |                          |       |       |       |       |       |       |       |       |       |       |
|--------------|--------------|-------------------------------------------------------------------|----------|--------------------------|-------|-------|-------|-------|-------|-------|-------|-------|-------|-------|
| PPIE_HUMAN   | PPIE_HUMAN   | Peptidyl-prolyl cis-trans isomerase E                             | PPIE     | <input type="checkbox"/> | 0 (0) | 0 (0) | 0 (0) | 0 (0) | 0 (0) | 0 (0) | 0 (0) | 1 (1) | 2 (2) | 0 (0) |
| PSMD4_HUMAN  | PSMD4_HUMAN  | 26S proteasome non-ATPase regulatory subunit 4                    | PSMD4    | <input type="checkbox"/> | 0 (0) | 0 (0) | 1 (1) | 2 (1) | 0 (0) | 0 (0) | 0 (0) | 0 (0) | 0 (0) | 0 (0) |
| SERA_HUMAN   | SERA_HUMAN   | D-3-phosphoglycerate dehydrogenase                                | PHGDH    | <input type="checkbox"/> | 0 (0) | 0 (0) | 0 (0) | 0 (0) | 0 (0) | 2 (1) | 0 (0) | 0 (0) | 0 (0) | 1 (1) |
| SRP68_HUMAN  | SRP68_HUMAN  | Signal recognition particle 68 kDa protein                        | SRP68    | <input type="checkbox"/> | 0 (0) | 0 (0) | 0 (0) | 0 (0) | 1 (1) | 1 (1) | 0 (0) | 0 (0) | 1 (1) | 0 (0) |
| NRP1_HUMAN   | NRP1_HUMAN   | Neuropilin-1                                                      | NRP1     | <input type="checkbox"/> | 0 (0) | 0 (0) | 0 (0) | 0 (0) | 0 (0) | 2 (2) | 1 (1) | 0 (0) | 0 (0) | 0 (0) |
| RD23B_HUMAN  | RD23B_HUMAN  | UV excision repair protein RAD23 homolog B                        | RAD23B   | <input type="checkbox"/> | 0 (0) | 0 (0) | 0 (0) | 0 (0) | 0 (0) | 0 (0) | 1 (1) | 2 (1) | 2 (1) | 0 (0) |
| RRBP1_HUMAN  | RRBP1_HUMAN  | Ribosome-binding protein 1                                        | RRBP1    | <input type="checkbox"/> | 0 (0) | 0 (0) | 0 (0) | 0 (0) | 0 (0) | 0 (0) | 1 (1) | 2 (1) | 2 (1) | 0 (0) |
| TOIP2_HUMAN  | TOIP2_HUMAN  | Torsin-1A-interacting protein 2                                   | TOR1AIP2 | <input type="checkbox"/> | 0 (0) | 0 (0) | 0 (0) | 0 (0) | 0 (0) | 0 (0) | 1 (1) | 2 (1) | 2 (1) | 0 (0) |
| ZMYM1_HUMAN  | ZMYM1_HUMAN  | Zinc finger MYM-type protein 1                                    | ZMYM1    | <input type="checkbox"/> | 0 (0) | 0 (0) | 0 (0) | 0 (0) | 0 (0) | 0 (0) | 1 (1) | 2 (1) | 2 (1) | 0 (0) |
| TBCB_HUMAN   | TBCB_HUMAN   | Tubulin-folding cofactor B                                        | TBCB     | <input type="checkbox"/> | 0 (0) | 0 (0) | 0 (0) | 0 (0) | 0 (0) | 0 (0) | 1 (1) | 2 (1) | 2 (1) | 0 (0) |
| PHC1_HUMAN   | PHC1_HUMAN   | Polyhomeotic-like protein 1                                       | PHC1     | <input type="checkbox"/> | 0 (0) | 0 (0) | 0 (0) | 0 (0) | 0 (0) | 0 (0) | 1 (1) | 2 (1) | 2 (1) | 0 (0) |
| SEP10_HUMAN  | SEP10_HUMAN  | Septin-10                                                         | SEPT10   | <input type="checkbox"/> | 0 (0) | 0 (0) | 1 (1) | 2 (2) | 0 (0) | 0 (0) | 0 (0) | 0 (0) | 0 (0) | 0 (0) |
| SENP6_HUMAN  | SENP6_HUMAN  | Sentrin-specific protease 6                                       | SENP6    | <input type="checkbox"/> | 0 (0) | 0 (0) | 0 (0) | 0 (0) | 0 (0) | 0 (0) | 1 (1) | 2 (2) | 2 (2) | 0 (0) |
| PSMD9_HUMAN  | PSMD9_HUMAN  | 26S proteasome non-ATPase regulatory subunit 9                    | PSMD9    | <input type="checkbox"/> | 0 (0) | 0 (0) | 0 (0) | 0 (0) | 0 (0) | 0 (0) | 1 (1) | 2 (1) | 2 (1) | 0 (0) |
| PYR1_HUMAN   | PYR1_HUMAN   | CAD protein                                                       | CAD      | <input type="checkbox"/> | 0 (0) | 0 (0) | 0 (0) | 0 (0) | 0 (0) | 0 (0) | 0 (0) | 2 (2) | 2 (2) | 0 (0) |
| K0664_HUMAN  | K0664_HUMAN  | Protein KIAA0664                                                  | KIAA0664 | <input type="checkbox"/> | 0 (0) | 0 (0) | 0 (0) | 0 (0) | 0 (0) | 0 (0) | 1 (1) | 1 (1) | 1 (1) | 0 (0) |
| TPC11_HUMAN  | TPC11_HUMAN  | --                                                                | --       | <input type="checkbox"/> | 0 (0) | 0 (0) | 0 (0) | 0 (0) | 0 (0) | 0 (0) | 0 (0) | 2 (1) | 2 (1) | 0 (0) |
| CIZ1_HUMAN   | CIZ1_HUMAN   | Cip1-interacting zinc finger protein                              | CIZ1     | <input type="checkbox"/> | 0 (0) | 0 (0) | 0 (0) | 0 (0) | 0 (0) | 0 (0) | 1 (1) | 1 (1) | 1 (1) | 0 (0) |
| ZFY19_HUMAN  | ZFY19_HUMAN  | Zinc finger FYVE domain-containing protein 19                     | ZFYVE19  | <input type="checkbox"/> | 0 (0) | 0 (0) | 0 (0) | 0 (0) | 0 (0) | 0 (0) | 0 (0) | 2 (1) | 2 (1) | 0 (0) |
| TBB1_HUMAN   | TBB1_HUMAN   | Tubulin beta-1 chain                                              | TUBB1    | <input type="checkbox"/> | 0 (0) | 0 (0) | 0 (0) | 0 (0) | 0 (0) | 0 (0) | 0 (0) | 2 (1) | 2 (1) | 0 (0) |
| PHAX_HUMAN   | PHAX_HUMAN   | Phosphorylated adapter RNA export protein                         | PHAX     | <input type="checkbox"/> | 0 (0) | 0 (0) | 0 (0) | 0 (0) | 0 (0) | 0 (0) | 0 (0) | 2 (1) | 2 (1) | 0 (0) |
| RALY_HUMAN   | RALY_HUMAN   | RNA-binding protein Raly                                          | RALY     | <input type="checkbox"/> | 0 (0) | 0 (0) | 0 (0) | 0 (0) | 0 (0) | 0 (0) | 0 (0) | 2 (2) | 2 (2) | 0 (0) |
| SYK_HUMAN    | SYK_HUMAN    | Lysyl-tRNA synthetase                                             | KARS     | <input type="checkbox"/> | 0 (0) | 0 (0) | 0 (0) | 0 (0) | 0 (0) | 0 (0) | 0 (0) | 2 (1) | 2 (1) | 0 (0) |
| TARA_HUMAN   | TARA_HUMAN   | TRIO and F-actin-binding protein                                  | TRIOBP   | <input type="checkbox"/> | 0 (0) | 0 (0) | 0 (0) | 0 (0) | 0 (0) | 0 (0) | 0 (0) | 2 (1) | 2 (1) | 0 (0) |
| PA2G4_HUMAN  | PA2G4_HUMAN  | Proliferation-associated protein 2G4                              | PA2G4    | <input type="checkbox"/> | 0 (0) | 0 (0) | 0 (0) | 0 (0) | 0 (0) | 0 (0) | 1 (1) | 1 (1) | 1 (1) | 0 (0) |
| MICA1_HUMAN  | MICA1_HUMAN  | NEDD9-interacting protein with calponin homology and LIM domains  | MICAL1   | <input type="checkbox"/> | 0 (0) | 0 (0) | 0 (0) | 0 (0) | 0 (0) | 0 (0) | 0 (0) | 2 (1) | 2 (1) | 0 (0) |
| CC037_HUMAN  | CC037_HUMAN  | UPF0361 protein C3orf37                                           | C3orf37  | <input type="checkbox"/> | 0 (0) | 0 (0) | 0 (0) | 0 (0) | 0 (0) | 0 (0) | 0 (0) | 2 (1) | 2 (1) | 0 (0) |
| DDX3X_HUMAN  | DDX3X_HUMAN  | ATP-dependent RNA helicase DDX3X                                  | DDX3X    | <input type="checkbox"/> | 0 (0) | 0 (0) | 0 (0) | 0 (0) | 0 (0) | 0 (0) | 0 (0) | 2 (1) | 2 (1) | 0 (0) |
| AKP8L_HUMAN  | AKP8L_HUMAN  | A-kinase anchor protein 8-like                                    | AKAP8L   | <input type="checkbox"/> | 0 (0) | 0 (0) | 0 (0) | 0 (0) | 0 (0) | 0 (0) | 0 (0) | 2 (1) | 2 (1) | 0 (0) |
| SRGEF_HUMAN  | SRGEF_HUMAN  | Secretion-regulating guanine nucleotide exchange factor           | SERGEF   | <input type="checkbox"/> | 0 (0) | 0 (0) | 0 (0) | 0 (0) | 0 (0) | 0 (0) | 1 (1) | 1 (1) | 1 (1) | 0 (0) |
| ZN207_HUMAN  | ZN207_HUMAN  | Zinc finger protein 207                                           | ZNF207   | <input type="checkbox"/> | 0 (0) | 0 (0) | 0 (0) | 0 (0) | 0 (0) | 0 (0) | 1 (1) | 1 (1) | 1 (1) | 0 (0) |
| DESP_HUMAN   | DESP_HUMAN   | Desmoplakin                                                       | DSP      | <input type="checkbox"/> | 0 (0) | 0 (0) | 0 (0) | 0 (0) | 0 (0) | 0 (0) | 0 (0) | 2 (2) | 2 (2) | 0 (0) |
| DSRAD_HUMAN  | DSRAD_HUMAN  | Double-stranded RNA-specific adenosine deaminase                  | ADAR     | <input type="checkbox"/> | 0 (0) | 0 (0) | 0 (0) | 0 (0) | 0 (0) | 0 (0) | 0 (0) | 2 (1) | 2 (1) | 0 (0) |
| NGDN_HUMAN   | NGDN_HUMAN   | Neuroguidin                                                       | NGDN     | <input type="checkbox"/> | 0 (0) | 0 (0) | 0 (0) | 0 (0) | 0 (0) | 0 (0) | 0 (0) | 2 (2) | 2 (2) | 0 (0) |
| HNRL1_HUMAN  | HNRL1_HUMAN  | Heterogeneous nuclear ribonucleoprotein L-like                    | HNRL1    | <input type="checkbox"/> | 0 (0) | 0 (0) | 0 (0) | 0 (0) | 0 (0) | 0 (0) | 0 (0) | 2 (1) | 2 (1) | 0 (0) |
| GRAP1_HUMAN  | GRAP1_HUMAN  | GRIP1-associated protein 1                                        | GRIPAP1  | <input type="checkbox"/> | 0 (0) | 0 (0) | 0 (0) | 0 (0) | 0 (0) | 0 (0) | 0 (0) | 2 (2) | 2 (2) | 0 (0) |
| EIF3E_HUMAN  | EIF3E_HUMAN  | Eukaryotic translation initiation factor 3 subunit E              | EIF3E    | <input type="checkbox"/> | 0 (0) | 0 (0) | 0 (0) | 0 (0) | 0 (0) | 0 (0) | 0 (0) | 2 (1) | 2 (1) | 0 (0) |
| NIPA_HUMAN   | NIPA_HUMAN   | Nuclear-interacting partner of ALK                                | ZC3HC1   | <input type="checkbox"/> | 0 (0) | 0 (0) | 0 (0) | 0 (0) | 0 (0) | 0 (0) | 0 (0) | 2 (2) | 2 (2) | 0 (0) |
| EIF3B_HUMAN  | EIF3B_HUMAN  | Eukaryotic translation initiation factor 3 subunit B              | EIF3B    | <input type="checkbox"/> | 0 (0) | 0 (0) | 0 (0) | 0 (0) | 0 (0) | 1 (1) | 0 (0) | 1 (1) | 1 (1) | 0 (0) |
| LPAR3_HUMAN  | LPAR3_HUMAN  | Lysophosphatidic acid receptor 3                                  | LPAR3    | <input type="checkbox"/> | 0 (0) | 0 (0) | 0 (0) | 0 (0) | 1 (1) | 0 (0) | 1 (1) | 0 (0) | 0 (0) | 0 (0) |
| PDIA4_HUMAN  | PDIA4_HUMAN  | Protein disulfide-isomerase A4                                    | PDIA4    | <input type="checkbox"/> | 0 (0) | 0 (0) | 0 (0) | 0 (0) | 1 (1) | 0 (0) | 0 (0) | 1 (1) | 0 (0) | 0 (0) |
| PLCG1_HUMAN  | PLCG1_HUMAN  | 1-phosphatidylinositol-4,5-bisphosphate phosphodiesterase gamma-1 | PLCG1    | <input type="checkbox"/> | 0 (0) | 0 (0) | 0 (0) | 0 (0) | 1 (1) | 0 (0) | 0 (0) | 0 (0) | 0 (0) | 1 (1) |
| CDK11A_HUMAN | CDK11A_HUMAN | Cell division protein kinase 11A                                  | CDK11A   | <input type="checkbox"/> | 0 (0) | 0 (0) | 0 (0) | 0 (0) | 0 (0) | 1 (1) | 0 (0) | 1 (1) | 0 (0) | 0 (0) |



|              |              |                                                                                               |         |                          |       |       |       |       |       |       |       |       |       |       |
|--------------|--------------|-----------------------------------------------------------------------------------------------|---------|--------------------------|-------|-------|-------|-------|-------|-------|-------|-------|-------|-------|
| PCCB_HUMAN   | PCCB_HUMAN   | Propionyl-CoA carboxylase beta chain, mitochondrial                                           | PCCB    | <input type="checkbox"/> | 0 (0) | 0 (0) | 0 (0) | 0 (0) | 0 (0) | 0 (0) | 0 (0) | 0 (0) | 0 (0) | 1 (1) |
| KANK1_HUMAN  | KANK1_HUMAN  | KN motif and ankyrin repeat domain-containing protein 1                                       | KANK1   | <input type="checkbox"/> | 0 (0) | 0 (0) | 0 (0) | 0 (0) | 0 (0) | 0 (0) | 0 (0) | 0 (0) | 0 (0) | 1 (1) |
| ZPR1_HUMAN   | ZPR1_HUMAN   | Zinc finger protein ZPR1                                                                      | ZNF259  | <input type="checkbox"/> | 0 (0) | 0 (0) | 0 (0) | 0 (0) | 0 (0) | 0 (0) | 0 (0) | 0 (0) | 1 (1) | 0 (0) |
| SV2A_HUMAN   | SV2A_HUMAN   | Synaptic vesicle glycoprotein 2A                                                              | SV2A    | <input type="checkbox"/> | 0 (0) | 0 (0) | 0 (0) | 0 (0) | 0 (0) | 0 (0) | 0 (0) | 0 (0) | 1 (1) | 0 (0) |
| SIN3A_HUMAN  | SIN3A_HUMAN  | Paired amphipathic helix protein Sin3a                                                        | SIN3A   | <input type="checkbox"/> | 0 (0) | 0 (0) | 0 (0) | 0 (0) | 0 (0) | 0 (0) | 0 (0) | 0 (0) | 1 (1) | 0 (0) |
| LRC59_HUMAN  | LRC59_HUMAN  | Leucine-rich repeat-containing protein 59                                                     | LRRCS9  | <input type="checkbox"/> | 0 (0) | 0 (0) | 0 (0) | 0 (0) | 0 (0) | 0 (0) | 0 (0) | 0 (0) | 1 (1) | 0 (0) |
| MCM5_HUMAN   | MCM5_HUMAN   | DNA replication licensing factor MCM5                                                         | MCM5    | <input type="checkbox"/> | 0 (0) | 0 (0) | 0 (0) | 0 (0) | 0 (0) | 0 (0) | 0 (0) | 0 (0) | 1 (1) | 0 (0) |
| JHD2C_HUMAN  | JHD2C_HUMAN  | Probable JmjC domain-containing histone demethylation protein 2C                              | JMJD1C  | <input type="checkbox"/> | 0 (0) | 0 (0) | 0 (0) | 0 (0) | 0 (0) | 0 (0) | 0 (0) | 0 (0) | 1 (1) | 0 (0) |
| ICAL_HUMAN   | ICAL_HUMAN   | Calpastatin                                                                                   | CAST    | <input type="checkbox"/> | 0 (0) | 0 (0) | 0 (0) | 0 (0) | 0 (0) | 0 (0) | 0 (0) | 0 (0) | 1 (1) | 0 (0) |
| GTR14_HUMAN  | GTR14_HUMAN  | Solute carrier family 2, facilitated glucose transporter member 14                            | SLC2A14 | <input type="checkbox"/> | 0 (0) | 0 (0) | 0 (0) | 0 (0) | 0 (0) | 0 (0) | 0 (0) | 0 (0) | 1 (1) | 0 (0) |
| NOP2_HUMAN   | NOP2_HUMAN   | Putative ribosomal RNA methyltransferase NOP2                                                 | NOP2    | <input type="checkbox"/> | 0 (0) | 0 (0) | 0 (0) | 0 (0) | 0 (0) | 0 (0) | 0 (0) | 0 (0) | 1 (1) | 0 (0) |
| PAPOA_HUMAN  | PAPOA_HUMAN  | Poly(A) polymerase alpha                                                                      | PAPOLA  | <input type="checkbox"/> | 0 (0) | 0 (0) | 0 (0) | 0 (0) | 0 (0) | 0 (0) | 0 (0) | 0 (0) | 1 (1) | 0 (0) |
| RBM10_HUMAN  | RBM10_HUMAN  | RNA-binding protein 10                                                                        | RBM10   | <input type="checkbox"/> | 0 (0) | 0 (0) | 0 (0) | 0 (0) | 0 (0) | 0 (0) | 0 (0) | 0 (0) | 1 (1) | 0 (0) |
| RCN1_HUMAN   | RCN1_HUMAN   | Reticulocalbin-1                                                                              | RCN1    | <input type="checkbox"/> | 0 (0) | 0 (0) | 0 (0) | 0 (0) | 0 (0) | 0 (0) | 0 (0) | 0 (0) | 1 (1) | 0 (0) |
| PTN23_HUMAN  | PTN23_HUMAN  | Tyrosine-protein phosphatase non-receptor type 23                                             | PTPN23  | <input type="checkbox"/> | 0 (0) | 0 (0) | 0 (0) | 0 (0) | 0 (0) | 0 (0) | 0 (0) | 0 (0) | 1 (1) | 0 (0) |
| PTAR1_HUMAN  | PTAR1_HUMAN  | Protein prenyltransferase alpha subunit repeat-containing protein 1                           | PTAR1   | <input type="checkbox"/> | 0 (0) | 0 (0) | 0 (0) | 0 (0) | 0 (0) | 0 (0) | 0 (0) | 0 (0) | 1 (1) | 0 (0) |
| PGAM5_HUMAN  | PGAM5_HUMAN  | Serine/threonine-protein phosphatase PGAM5, mitochondrial                                     | PGAM5   | <input type="checkbox"/> | 0 (0) | 0 (0) | 0 (0) | 0 (0) | 0 (0) | 0 (0) | 0 (0) | 0 (0) | 1 (1) | 0 (0) |
| GEM14_HUMAN  | GEM14_HUMAN  | Component of gems 4                                                                           | GEMIN4  | <input type="checkbox"/> | 0 (0) | 0 (0) | 0 (0) | 0 (0) | 0 (0) | 0 (0) | 0 (0) | 0 (0) | 1 (1) | 0 (0) |
| EF1G_HUMAN   | EF1G_HUMAN   | Elongation factor 1-gamma                                                                     | EEF1G   | <input type="checkbox"/> | 0 (0) | 0 (0) | 0 (0) | 0 (0) | 1 (1) | 0 (0) | 0 (0) | 0 (0) | 0 (0) | 0 (0) |
| NED4L_HUMAN  | NED4L_HUMAN  | E3 ubiquitin-protein ligase NEDD4-like                                                        | NEDD4L  | <input type="checkbox"/> | 0 (0) | 0 (0) | 0 (0) | 0 (0) | 0 (0) | 0 (0) | 0 (0) | 1 (1) | 0 (0) | 0 (0) |
| IF2G_HUMAN   | IF2G_HUMAN   | Eukaryotic translation initiation factor 2 subunit 3                                          | EIF2S3  | <input type="checkbox"/> | 0 (0) | 0 (0) | 0 (0) | 0 (0) | 0 (0) | 1 (1) | 0 (0) | 0 (0) | 0 (0) | 0 (0) |
| MAP4_HUMAN   | MAP4_HUMAN   | Microtubule-associated protein 4                                                              | MAP4    | <input type="checkbox"/> | 0 (0) | 0 (0) | 0 (0) | 0 (0) | 0 (0) | 0 (0) | 0 (0) | 1 (1) | 0 (0) | 0 (0) |
| HCFC1_HUMAN  | HCFC1_HUMAN  | Host cell factor 1                                                                            | HCFC1   | <input type="checkbox"/> | 0 (0) | 0 (0) | 0 (0) | 0 (0) | 0 (0) | 0 (0) | 0 (0) | 1 (1) | 0 (0) | 0 (0) |
| HECD1_HUMAN  | HECD1_HUMAN  | E3 ubiquitin-protein ligase HECTD1                                                            | HECTD1  | <input type="checkbox"/> | 0 (0) | 0 (0) | 0 (0) | 0 (0) | 0 (0) | 1 (1) | 0 (0) | 0 (0) | 0 (0) | 0 (0) |
| PIPNA_HUMAN  | PIPNA_HUMAN  | Phosphatidylinositol transfer protein alpha isoform                                           | PITPNA  | <input type="checkbox"/> | 0 (0) | 0 (0) | 1 (1) | 0 (0) | 0 (0) | 0 (0) | 0 (0) | 0 (0) | 0 (0) | 0 (0) |
| PHLP_HUMAN   | PHLP_HUMAN   | Phosducin-like protein                                                                        | PDCL    | <input type="checkbox"/> | 0 (0) | 1 (1) | 0 (0) | 0 (0) | 0 (0) | 0 (0) | 0 (0) | 0 (0) | 0 (0) | 0 (0) |
| RAB28_HUMAN  | RAB28_HUMAN  | Ras-related protein Rab-28                                                                    | RAB28   | <input type="checkbox"/> | 0 (0) | 0 (0) | 1 (1) | 0 (0) | 0 (0) | 0 (0) | 0 (0) | 0 (0) | 0 (0) | 0 (0) |
| ACSL3_HUMAN  | ACSL3_HUMAN  | Long-chain-fatty-acid-CoA ligase 3                                                            | ACSL3   | <input type="checkbox"/> | 0 (0) | 0 (0) | 0 (0) | 0 (0) | 0 (0) | 1 (1) | 0 (0) | 0 (0) | 0 (0) | 0 (0) |
| LMAN1_HUMAN  | LMAN1_HUMAN  | Protein ERGIC-53                                                                              | LMAN1   | <input type="checkbox"/> | 0 (0) | 0 (0) | 0 (0) | 0 (0) | 0 (0) | 1 (1) | 0 (0) | 0 (0) | 0 (0) | 0 (0) |
| NSD1_HUMAN   | NSD1_HUMAN   | Histone-lysine N-methyltransferase, H3 lysine-36 and H4 lysine-20 specific                    | NSD1    | <input type="checkbox"/> | 0 (0) | 0 (0) | 0 (0) | 0 (0) | 0 (0) | 1 (1) | 0 (0) | 0 (0) | 0 (0) | 0 (0) |
| SATB1_HUMAN  | SATB1_HUMAN  | DNA-binding protein SATB1                                                                     | SATB1   | <input type="checkbox"/> | 0 (0) | 1 (1) | 0 (0) | 0 (0) | 0 (0) | 0 (0) | 0 (0) | 0 (0) | 0 (0) | 0 (0) |
| GIPC1_HUMAN  | GIPC1_HUMAN  | PDZ domain-containing protein GIPC1                                                           | GIPC1   | <input type="checkbox"/> | 0 (0) | 0 (0) | 1 (1) | 0 (0) | 0 (0) | 0 (0) | 0 (0) | 0 (0) | 0 (0) | 0 (0) |
| AT12A_HUMAN  | AT12A_HUMAN  | Potassium-transporting ATPase alpha chain 2                                                   | ATP12A  | <input type="checkbox"/> | 0 (0) | 0 (0) | 0 (0) | 0 (0) | 0 (0) | 0 (0) | 1 (1) | 0 (0) | 0 (0) | 0 (0) |
| YTDC1_HUMAN  | YTDC1_HUMAN  | YTH domain-containing protein 1                                                               | YTHDC1  | <input type="checkbox"/> | 0 (0) | 1 (1) | 0 (0) | 0 (0) | 0 (0) | 0 (0) | 0 (0) | 0 (0) | 0 (0) | 0 (0) |
| MSH3_HUMAN   | MSH3_HUMAN   | DNA mismatch repair protein Msh3                                                              | MSH3    | <input type="checkbox"/> | 0 (0) | 0 (0) | 1 (1) | 0 (0) | 0 (0) | 0 (0) | 0 (0) | 0 (0) | 0 (0) | 0 (0) |
| VDAC2_HUMAN  | VDAC2_HUMAN  | Voltage-dependent anion-selective channel protein 2                                           | VDAC2   | <input type="checkbox"/> | 0 (0) | 0 (0) | 0 (0) | 0 (0) | 0 (0) | 1 (1) | 0 (0) | 0 (0) | 0 (0) | 0 (0) |
| PPP6R3_HUMAN | PPP6R3_HUMAN | Serine/threonine-protein phosphatase 6 regulatory subunit 3                                   | PPP6R3  | <input type="checkbox"/> | 0 (0) | 0 (0) | 0 (0) | 0 (0) | 0 (0) | 1 (1) | 0 (0) | 0 (0) | 0 (0) | 0 (0) |
| RAD50_HUMAN  | RAD50_HUMAN  | DNA repair protein RAD50                                                                      | RAD50   | <input type="checkbox"/> | 0 (0) | 0 (0) | 0 (0) | 0 (0) | 0 (0) | 1 (1) | 0 (0) | 0 (0) | 0 (0) | 0 (0) |
| SMRD1_HUMAN  | SMRD1_HUMAN  | SWI/SNF-related matrix-associated actin-dependent regulator of chromatin subfamily D member 1 | SMARCD1 | <input type="checkbox"/> | 0 (0) | 0 (0) | 0 (0) | 0 (0) | 0 (0) | 1 (1) | 0 (0) | 0 (0) | 0 (0) | 0 (0) |
| SAE2_HUMAN   | SAE2_HUMAN   | SUMO-activating enzyme subunit 2                                                              | UBA2    | <input type="checkbox"/> | 0 (0) | 0 (0) | 0 (0) | 0 (0) | 0 (0) | 0 (0) | 0 (0) | 1 (1) | 0 (0) | 0 (0) |
| SENP3_HUMAN  | SENP3_HUMAN  | Sentrin-specific protease 3                                                                   | SENP3   | <input type="checkbox"/> | 0 (0) | 0 (0) | 0 (0) | 0 (0) | 0 (0) | 0 (0) | 0 (0) | 1 (1) | 0 (0) | 0 (0) |

|              |              |                                                                    |         |                          |       |       |       |       |       |       |       |       |       |
|--------------|--------------|--------------------------------------------------------------------|---------|--------------------------|-------|-------|-------|-------|-------|-------|-------|-------|-------|
| B4DLZ5_HUMAN | B4DLZ5_HUMAN | N-acetylglucosamine kinase                                         | NAGK    | <input type="checkbox"/> | 0 (0) | 1 (1) | 0 (0) | 0 (0) | 0 (0) | 0 (0) | 0 (0) | 0 (0) | 0 (0) |
| DYHC1_HUMAN  | DYHC1_HUMAN  | Cytoplasmic dynein 1 heavy chain 1                                 | DYNC1H1 | <input type="checkbox"/> | 0 (0) | 0 (0) | 0 (0) | 0 (0) | 1 (1) | 0 (0) | 0 (0) | 0 (0) | 0 (0) |
| VANG1_HUMAN  | VANG1_HUMAN  | Vang-like protein 1                                                | VANGL1  | <input type="checkbox"/> | 0 (0) | 0 (0) | 0 (0) | 0 (0) | 0 (0) | 0 (0) | 1 (1) | 0 (0) | 0 (0) |
| FAH2A_HUMAN  | FAH2A_HUMAN  | Fumarylacetoacetate hydrolase domain-containing protein 2A         | FAHD2A  | <input type="checkbox"/> | 0 (0) | 0 (0) | 0 (0) | 0 (0) | 1 (1) | 0 (0) | 0 (0) | 0 (0) | 0 (0) |
| AGAP1_HUMAN  | AGAP1_HUMAN  | Arf-GAP with GTPase, ANK repeat and PH domain-containing protein 1 | AGAP1   | <input type="checkbox"/> | 0 (0) | 0 (0) | 0 (0) | 0 (0) | 1 (1) | 0 (0) | 0 (0) | 0 (0) | 0 (0) |
| CEP97_HUMAN  | CEP97_HUMAN  | Centrosomal protein of 97 kDa                                      | CEP97   | <input type="checkbox"/> | 0 (0) | 0 (0) | 0 (0) | 1 (1) | 0 (0) | 0 (0) | 0 (0) | 0 (0) | 0 (0) |
| PSIP1_HUMAN  | PSIP1_HUMAN  | PC4 and SFRS1-interacting protein                                  | PSIP1   | <input type="checkbox"/> | 0 (0) | 0 (0) | 0 (0) | 1 (1) | 0 (0) | 0 (0) | 0 (0) | 0 (0) | 0 (0) |
| KIF18A_HUMAN | KIF18A_HUMAN | Kinesin-like protein KIF18A                                        | KIF18A  | <input type="checkbox"/> | 0 (0) | 0 (0) | 0 (0) | 1 (1) | 0 (0) | 0 (0) | 0 (0) | 0 (0) | 0 (0) |
| KAD1_HUMAN   | KAD1_HUMAN   | Adenylate kinase isoenzyme 1                                       | AK1     | <input type="checkbox"/> | 0 (0) | 0 (0) | 0 (0) | 1 (1) | 0 (0) | 0 (0) | 0 (0) | 0 (0) | 0 (0) |
| HERC2_HUMAN  | HERC2_HUMAN  | E3 ubiquitin-protein ligase HERC2                                  | HERC2   | <input type="checkbox"/> | 0 (0) | 0 (0) | 0 (0) | 0 (0) | 1 (1) | 0 (0) | 0 (0) | 0 (0) | 0 (0) |
| JMJD6_HUMAN  | JMJD6_HUMAN  | Bifunctional arginine demethylase and lysyl-hydroxylase JMJD6      | JMJD6   | <input type="checkbox"/> | 0 (0) | 0 (0) | 0 (0) | 0 (0) | 1 (1) | 0 (0) | 0 (0) | 0 (0) | 0 (0) |
| UBE2N_HUMAN  | UBE2N_HUMAN  | Ubiquitin-conjugating enzyme E2 N                                  | UBE2N   | <input type="checkbox"/> | 0 (0) | 0 (0) | 0 (0) | 0 (0) | 1 (1) | 0 (0) | 0 (0) | 0 (0) | 0 (0) |
| SF3B2_HUMAN  | SF3B2_HUMAN  | Splicing factor 3B subunit 2                                       | SF3B2   | <input type="checkbox"/> | 0 (0) | 0 (0) | 0 (0) | 0 (0) | 0 (0) | 0 (0) | 0 (0) | 1 (1) | 0 (0) |
| WDR1_HUMAN   | WDR1_HUMAN   | WD repeat-containing protein 1                                     | WDR1    | <input type="checkbox"/> | 0 (0) | 0 (0) | 0 (0) | 0 (0) | 1 (1) | 0 (0) | 0 (0) | 0 (0) | 0 (0) |
| TRIM25_HUMAN | TRIM25_HUMAN | E3 ubiquitin/ISG15 ligase TRIM25                                   | TRIM25  | <input type="checkbox"/> | 0 (0) | 0 (0) | 0 (0) | 0 (0) | 1 (1) | 0 (0) | 0 (0) | 0 (0) | 0 (0) |
| NEK2_HUMAN   | NEK2_HUMAN   | Serine/threonine-protein kinase Nek2                               | NEK2    | <input type="checkbox"/> | 0 (0) | 1 (1) | 0 (0) | 0 (0) | 0 (0) | 0 (0) | 0 (0) | 0 (0) | 0 (0) |
| LMTK2_HUMAN  | LMTK2_HUMAN  | Serine/threonine-protein kinase LMTK2                              | LMTK2   | <input type="checkbox"/> | 0 (0) | 1 (1) | 0 (0) | 0 (0) | 0 (0) | 0 (0) | 0 (0) | 0 (0) | 0 (0) |
| SMD2_HUMAN   | SMD2_HUMAN   | Small nuclear ribonucleoprotein Sm D2                              | SNRPD2  | <input type="checkbox"/> | 0 (0) | 0 (0) | 0 (0) | 0 (0) | 1 (1) | 0 (0) | 0 (0) | 0 (0) | 0 (0) |
| TAGL_HUMAN   | TAGL_HUMAN   | Transgelin                                                         | TAGLN   | <input type="checkbox"/> | 0 (0) | 0 (0) | 1 (1) | 0 (0) | 0 (0) | 0 (0) | 0 (0) | 0 (0) | 0 (0) |
| TBL1R_HUMAN  | TBL1R_HUMAN  | F-box-like/WD repeat-containing protein TBL1XR1                    | TBL1XR1 | <input type="checkbox"/> | 0 (0) | 0 (0) | 0 (0) | 1 (1) | 0 (0) | 0 (0) | 0 (0) | 0 (0) | 0 (0) |

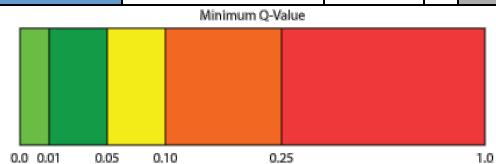

Summarization Method: Primary Reference
